# Supplementary material
Source: MDPI journal article supplement (https://www.mdpi.com/2073-8994/16/3/367)
Supplement: s1 [file s1]

Supplementary Materials

of

An ONIOM-based High-level Thermochemistry Study on  
Hydrogen Abstraction Reactions of Large Straight-chain  
Alkanes by Hydrogen, Hydroxyl, and Hydroperoxyl Radicals

Yicheng Chi <sup>1,2</sup>, Hao Pan <sup>1\*</sup>, Qinghui Meng <sup>3</sup>, Lidong Zhang <sup>3</sup>, and Peng Zhang <sup>2</sup>

<sup>1</sup> School of Automotive and Transportation Engineering, Shenzhen Polytechnic University, Shenzhen, 518005, China

<sup>2</sup> Department of Mechanical Engineering, City University of Hong Kong, Kowloon Tong, 999077, Hong Kong

<sup>3</sup> National Laboratory of Synchrotron, University of Science and Technology of China, Hefei, 230029, China

---

\*Corresponding author  
E-mail address: panhao@szpu.edu.cn

## Table of Contents

|                                                                                                                                                                                                                                                                                                                                                        |      |
|--------------------------------------------------------------------------------------------------------------------------------------------------------------------------------------------------------------------------------------------------------------------------------------------------------------------------------------------------------|------|
| 1. Figure .....                                                                                                                                                                                                                                                                                                                                        | s4   |
| Figure S1 The IRC curves of the reactions (a) H-R66: $\text{H} + \text{CH}_3(\text{CH}_2)_{14}\text{CH}_3 \rightarrow \text{H}_2 + \text{CH}_3\text{CH}(\text{CH}_2)_{13}\text{CH}_3$ and (b) H-R72: $\text{H} + \text{CH}_3(\text{CH}_2)_{14}\text{CH}_3 \rightarrow \text{H}_2 + \text{CH}_3(\text{CH}_2)_6\text{CH}(\text{CH}_2)_7\text{CH}_3$ .... | s4   |
| 2. Tables .....                                                                                                                                                                                                                                                                                                                                        | s5   |
| Table S1 The calculated results (EB and $\Delta H$ ) for the hydrogen abstraction reactions of $n\text{-C}_n\text{H}_{2n+2} + \text{H}$ ( $n = 10\text{-}16$ ) using the ONIOM method. ....                                                                                                                                                            | s5   |
| Table S2. The calculated results (EB and $\Delta H$ ) for the hydrogen abstraction reactions of $n\text{-C}_n\text{H}_{2n+2} + \text{OH}$ ( $n = 9\text{-}16$ ) using the ONIOM method (unit: kcal/mol). ....                                                                                                                                          | s7   |
| Table S3. The calculated results (EB and $\Delta H$ ) for the hydrogen abstraction reactions of $n\text{-C}_n\text{H}_{2n+2} + \text{HO}_2$ ( $n = 8\text{-}16$ ) using the ONIOM method (unit: kcal/mol). ....                                                                                                                                        | s9   |
| 3. Cartesian coordinates for all optimized geometries at the B3LYP/6-311++G(d,p) level.....                                                                                                                                                                                                                                                            | s11  |
| 2.1 Hydrogen abstraction reaction of $n\text{-C}_n\text{H}_{2n+2}$ ( $n = 1\text{-}16$ ) by H radical.....                                                                                                                                                                                                                                             | s11  |
| 2.1.1 C1 ( $\text{CH}_4$ ) .....                                                                                                                                                                                                                                                                                                                       | s11  |
| 2.1.2 C2 ( $\text{C}_2\text{H}_6$ ) .....                                                                                                                                                                                                                                                                                                              | s11  |
| 2.1.3 C3 ( $\text{C}_3\text{H}_8$ ) .....                                                                                                                                                                                                                                                                                                              | s12  |
| 2.1.4 C4 ( $n\text{-C}_4\text{H}_{10}$ ).....                                                                                                                                                                                                                                                                                                          | s14  |
| 2.1.5 C5 ( $n\text{-C}_5\text{H}_{10}$ ).....                                                                                                                                                                                                                                                                                                          | s16  |
| 2.1.6 C6 ( $n\text{-C}_6\text{H}_{14}$ ).....                                                                                                                                                                                                                                                                                                          | s19  |
| 2.1.7 C7 ( $n\text{-C}_7\text{H}_{16}$ ).....                                                                                                                                                                                                                                                                                                          | s22  |
| 2.1.8 C8 ( $n\text{-C}_8\text{H}_{18}$ ).....                                                                                                                                                                                                                                                                                                          | s28  |
| 2.1.9 C9 ( $n\text{-C}_9\text{H}_{20}$ ).....                                                                                                                                                                                                                                                                                                          | s34  |
| 2.1.10 C10 ( $n\text{-C}_{10}\text{H}_{22}$ ) .....                                                                                                                                                                                                                                                                                                    | s42  |
| 2.1.11 C11 ( $n\text{-C}_{11}\text{H}_{24}$ ).....                                                                                                                                                                                                                                                                                                     | s51  |
| 2.1.12 C12 ( $n\text{-C}_{12}\text{H}_{26}$ ) .....                                                                                                                                                                                                                                                                                                    | s62  |
| 2.1.13 C13 ( $n\text{-C}_{13}\text{H}_{28}$ ) .....                                                                                                                                                                                                                                                                                                    | s74  |
| 2.1.14 C14 ( $n\text{-C}_{14}\text{H}_{30}$ ) .....                                                                                                                                                                                                                                                                                                    | s89  |
| 2.1.15 C15 ( $n\text{-C}_{15}\text{H}_{32}$ ) .....                                                                                                                                                                                                                                                                                                    | s106 |
| 2.1.16 C16 ( $n\text{-C}_{16}\text{H}_{34}$ ) .....                                                                                                                                                                                                                                                                                                    | s125 |
| 2.2 Hydrogen abstraction reaction of $n\text{-C}_n\text{H}_{2n+2}$ ( $n = 1\text{-}16$ ) by $\text{HO}_2$ radical.....                                                                                                                                                                                                                                 | s147 |
| 2.2.1 C1 ( $\text{CH}_4$ ) .....                                                                                                                                                                                                                                                                                                                       | s147 |
| 2.2.2 C2 ( $\text{C}_2\text{H}_6$ ) .....                                                                                                                                                                                                                                                                                                              | s147 |
| 2.2.3 C3 ( $\text{C}_3\text{H}_8$ ) .....                                                                                                                                                                                                                                                                                                              | s147 |
| 2.2.4 C4 ( $n\text{-C}_4\text{H}_{10}$ ).....                                                                                                                                                                                                                                                                                                          | s148 |
| 2.2.5 C5 ( $n\text{-C}_5\text{H}_{10}$ ).....                                                                                                                                                                                                                                                                                                          | s149 |
| 2.2.6 C6 ( $n\text{-C}_6\text{H}_{14}$ ).....                                                                                                                                                                                                                                                                                                          | s151 |
| 2.2.7 C7 ( $n\text{-C}_7\text{H}_{16}$ ).....                                                                                                                                                                                                                                                                                                          | s153 |
| 2.2.8 C8 ( $n\text{-C}_8\text{H}_{18}$ ).....                                                                                                                                                                                                                                                                                                          | s155 |
| 2.2.9 C9 ( $n\text{-C}_9\text{H}_{20}$ ).....                                                                                                                                                                                                                                                                                                          | s158 |
| 2.2.10 C10 ( $n\text{-C}_{10}\text{H}_{22}$ ) .....                                                                                                                                                                                                                                                                                                    | s163 |
| 2.2.11 C11 ( $n\text{-C}_{11}\text{H}_{24}$ ).....                                                                                                                                                                                                                                                                                                     | s167 |
| 2.2.12 C12 ( $n\text{-C}_{12}\text{H}_{26}$ ) .....                                                                                                                                                                                                                                                                                                    | s173 |
| 2.2.13 C13 ( $n\text{-C}_{13}\text{H}_{28}$ ) .....                                                                                                                                                                                                                                                                                                    | s179 |

|                                                                                                              |      |
|--------------------------------------------------------------------------------------------------------------|------|
| 2.2.14 C14 ( $n\text{-C}_{14}\text{H}_{30}$ ) .....                                                          | s187 |
| 2.2.15 C15 ( $n\text{-C}_{15}\text{H}_{32}$ ) .....                                                          | s195 |
| 2.2.16 C16 ( $n\text{-C}_{16}\text{H}_{34}$ ) .....                                                          | s205 |
| 4. Cartesian coordinates for all optimized geometries at the M06-2X/6-311++G(d,p) level..                    | s216 |
| 3.1 Hydrogen abstraction reaction of $n\text{-C}_n\text{H}_{2n+2}$ ( $n = 1\text{-}16$ ) by OH radical ..... | s216 |
| 3.1.1 C1 ( $\text{CH}_4$ ) .....                                                                             | s216 |
| 3.1.2 C2 ( $\text{C}_2\text{H}_6$ ) .....                                                                    | s216 |
| 3.1.3 C3 ( $\text{C}_3\text{H}_8$ ) .....                                                                    | s217 |
| 3.1.4 C4 ( $n\text{-C}_4\text{H}_{10}$ ) .....                                                               | s219 |
| 3.1.5 C5 ( $n\text{-C}_5\text{H}_{12}$ ) .....                                                               | s221 |
| 3.1.6 C6 ( $n\text{-C}_6\text{H}_{14}$ ) .....                                                               | s224 |
| 3.1.7 C7 ( $n\text{-C}_7\text{H}_{16}$ ) .....                                                               | s228 |
| 3.1.8 C8 ( $n\text{-C}_8\text{H}_{18}$ ) .....                                                               | s233 |
| 3.1.9 C9 ( $n\text{-C}_9\text{H}_{20}$ ) .....                                                               | s239 |
| 3.1.10 C10 ( $n\text{-C}_{10}\text{H}_{22}$ ) .....                                                          | s247 |
| 3.1.11 C11 ( $n\text{-C}_{11}\text{H}_{24}$ ) .....                                                          | s256 |
| 3.1.12 C12 ( $n\text{-C}_{12}\text{H}_{26}$ ) .....                                                          | s268 |
| 3.1.13 C13 ( $n\text{-C}_{13}\text{H}_{28}$ ) .....                                                          | s280 |
| 3.1.14 C14 ( $n\text{-C}_{14}\text{H}_{30}$ ) .....                                                          | s296 |
| 3.1.15 C15 ( $n\text{-C}_{15}\text{H}_{32}$ ) .....                                                          | s312 |
| 3.1.16 C16 ( $n\text{-C}_{16}\text{H}_{34}$ ) .....                                                          | s332 |

# 1. Figure

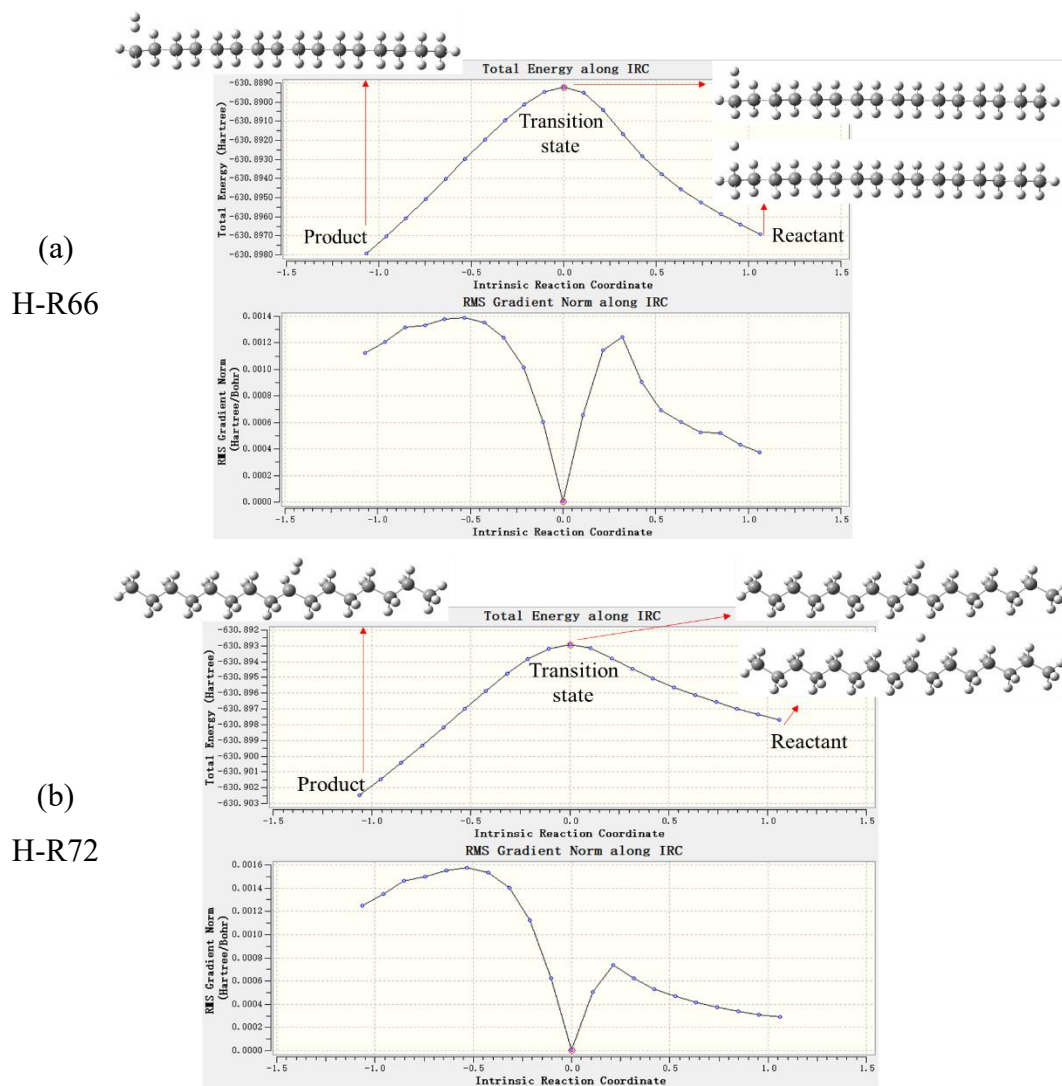

**Figure S1** The IRC curves of the reactions (a) H-R66:  $\text{H} + \text{CH}_3(\text{CH}_2)_{14}\text{CH}_3 \rightarrow \text{H}_2 + \text{CH}_3\text{CH}(\text{CH}_2)_{13}\text{CH}_3$  and (b) H-R72:  $\text{H} + \text{CH}_3(\text{CH}_2)_{14}\text{CH}_3 \rightarrow \text{H}_2 + \text{CH}_3(\text{CH}_2)_6\text{CH}(\text{CH}_2)_7\text{CH}_3$ .

## 2. Tables

**Table S1** The calculated results (EB and  $\Delta H$ ) for the hydrogen abstraction reactions of  $n\text{-C}_n\text{H}_{2n+2} + \text{H}$  ( $n = 10\text{-}16$ ) using the ONIOM method (unit: kcal/mol).

|     | No.   | Reactions                                                                                                                                    | EB   | $\Delta H$ |
|-----|-------|----------------------------------------------------------------------------------------------------------------------------------------------|------|------------|
| C10 | H-R26 | $\text{H} + \text{CH}_3(\text{CH}_2)_8\text{CH}_3 \rightarrow \text{H}_2 + \text{CH}_2(\text{CH}_2)_8\text{CH}_3$                            | 9.82 | -3.70      |
|     | H-R27 | $\text{H} + \text{CH}_3(\text{CH}_2)_8\text{CH}_3 \rightarrow \text{H}_2 + \text{CH}_3\text{CH}(\text{CH}_2)_7\text{CH}_3$                   | 7.15 | -6.47      |
|     | H-R28 | $\text{H} + \text{CH}_3(\text{CH}_2)_8\text{CH}_3 \rightarrow \text{H}_2 + \text{CH}_3\text{CH}_2\text{CH}(\text{CH}_2)_6\text{CH}_3$        | 7.05 | -6.19      |
|     | H-R29 | $\text{H} + \text{CH}_3(\text{CH}_2)_8\text{CH}_3 \rightarrow \text{H}_2 + \text{CH}_3(\text{CH}_2)_2\text{CH}(\text{CH}_2)_5\text{CH}_3$    | 7.04 | -6.25      |
|     | H-R30 | $\text{H} + \text{CH}_3(\text{CH}_2)_8\text{CH}_3 \rightarrow \text{H}_2 + \text{CH}_3(\text{CH}_2)_3\text{CH}(\text{CH}_2)_4\text{CH}_3$    | 7.02 | -6.27      |
| C11 | H-R31 | $\text{H} + \text{CH}_3(\text{CH}_2)_9\text{CH}_3 \rightarrow \text{H}_2 + \text{CH}_2(\text{CH}_2)_9\text{CH}_3$                            | 9.78 | -3.71      |
|     | H-R32 | $\text{H} + \text{CH}_3(\text{CH}_2)_9\text{CH}_3 \rightarrow \text{H}_2 + \text{CH}_3\text{CH}(\text{CH}_2)_8\text{CH}_3$                   | 7.12 | -6.47      |
|     | H-R33 | $\text{H} + \text{CH}_3(\text{CH}_2)_9\text{CH}_3 \rightarrow \text{H}_2 + \text{CH}_3\text{CH}_2\text{CH}(\text{CH}_2)_7\text{CH}_3$        | 7.06 | -6.19      |
|     | H-R34 | $\text{H} + \text{CH}_3(\text{CH}_2)_9\text{CH}_3 \rightarrow \text{H}_2 + \text{CH}_3(\text{CH}_2)_2\text{CH}(\text{CH}_2)_6\text{CH}_3$    | 6.96 | -6.26      |
|     | H-R35 | $\text{H} + \text{CH}_3(\text{CH}_2)_9\text{CH}_3 \rightarrow \text{H}_2 + \text{CH}_3(\text{CH}_2)_3\text{CH}(\text{CH}_2)_5\text{CH}_3$    | 6.99 | -6.25      |
|     | H-R36 | $\text{H} + \text{CH}_3(\text{CH}_2)_9\text{CH}_3 \rightarrow \text{H}_2 + \text{CH}_3(\text{CH}_2)_4\text{CH}(\text{CH}_2)_4\text{CH}_3$    | 6.98 | -6.32      |
| C12 | H-R37 | $\text{H} + \text{CH}_3(\text{CH}_2)_{10}\text{CH}_3 \rightarrow \text{H}_2 + \text{CH}_2(\text{CH}_2)_{10}\text{CH}_3$                      | 9.79 | -3.70      |
|     | H-R38 | $\text{H} + \text{CH}_3(\text{CH}_2)_{10}\text{CH}_3 \rightarrow \text{H}_2 + \text{CH}_3\text{CH}(\text{CH}_2)_9\text{CH}_3$                | 7.13 | -6.46      |
|     | H-R39 | $\text{H} + \text{CH}_3(\text{CH}_2)_{10}\text{CH}_3 \rightarrow \text{H}_2 + \text{CH}_3\text{CH}_2\text{CH}(\text{CH}_2)_8\text{CH}_3$     | 7.11 | -6.19      |
|     | H-R40 | $\text{H} + \text{CH}_3(\text{CH}_2)_{10}\text{CH}_3 \rightarrow \text{H}_2 + \text{CH}_3(\text{CH}_2)_2\text{CH}(\text{CH}_2)_7\text{CH}_3$ | 7.05 | -6.25      |
|     | H-R41 | $\text{H} + \text{CH}_3(\text{CH}_2)_{10}\text{CH}_3 \rightarrow \text{H}_2 + \text{CH}_3(\text{CH}_2)_3\text{CH}(\text{CH}_2)_6\text{CH}_3$ | 7.05 | -6.28      |
|     | H-R42 | $\text{H} + \text{CH}_3(\text{CH}_2)_{10}\text{CH}_3 \rightarrow \text{H}_2 + \text{CH}_3(\text{CH}_2)_4\text{CH}(\text{CH}_2)_5\text{CH}_3$ | 7.01 | -6.29      |
| C13 | H-R43 | $\text{H} + \text{CH}_3(\text{CH}_2)_{11}\text{CH}_3 \rightarrow \text{H}_2 + \text{CH}_2(\text{CH}_2)_{11}\text{CH}_3$                      | 9.79 | -3.72      |
|     | H-R44 | $\text{H} + \text{CH}_3(\text{CH}_2)_{11}\text{CH}_3 \rightarrow \text{H}_2 + \text{CH}_3\text{CH}(\text{CH}_2)_{10}\text{CH}_3$             | 7.16 | -6.49      |
|     | H-R45 | $\text{H} + \text{CH}_3(\text{CH}_2)_{11}\text{CH}_3 \rightarrow \text{H}_2 + \text{CH}_3\text{CH}_2\text{CH}(\text{CH}_2)_9\text{CH}_3$     | 7.09 | -6.21      |
|     | H-R46 | $\text{H} + \text{CH}_3(\text{CH}_2)_{11}\text{CH}_3 \rightarrow \text{H}_2 + \text{CH}_3(\text{CH}_2)_2\text{CH}(\text{CH}_2)_8\text{CH}_3$ | 7.05 | -6.28      |
|     | H-R47 | $\text{H} + \text{CH}_3(\text{CH}_2)_{11}\text{CH}_3 \rightarrow \text{H}_2 + \text{CH}_3(\text{CH}_2)_3\text{CH}(\text{CH}_2)_7\text{CH}_3$ | 7.00 | -6.26      |
|     | H-R48 | $\text{H} + \text{CH}_3(\text{CH}_2)_{11}\text{CH}_3 \rightarrow \text{H}_2 + \text{CH}_3(\text{CH}_2)_4\text{CH}(\text{CH}_2)_6\text{CH}_3$ | 7.00 | -6.37      |
|     | H-R49 | $\text{H} + \text{CH}_3(\text{CH}_2)_{11}\text{CH}_3 \rightarrow \text{H}_2 + \text{CH}_3(\text{CH}_2)_5\text{CH}(\text{CH}_2)_5\text{CH}_3$ | 6.97 | -6.18      |
| C14 | H-R50 | $\text{H} + \text{CH}_3(\text{CH}_2)_{12}\text{CH}_3 \rightarrow \text{H}_2 + \text{CH}_2(\text{CH}_2)_{12}\text{CH}_3$                      | 9.81 | -3.70      |
|     | H-R51 | $\text{H} + \text{CH}_3(\text{CH}_2)_{12}\text{CH}_3 \rightarrow \text{H}_2 + \text{CH}_3\text{CH}(\text{CH}_2)_{11}\text{CH}_3$             | 7.21 | -6.46      |
|     | H-R52 | $\text{H} + \text{CH}_3(\text{CH}_2)_{12}\text{CH}_3 \rightarrow \text{H}_2 + \text{CH}_3\text{CH}_2\text{CH}(\text{CH}_2)_{10}\text{CH}_3$  | 7.12 | -6.19      |
|     | H-R53 | $\text{H} + \text{CH}_3(\text{CH}_2)_{12}\text{CH}_3 \rightarrow \text{H}_2 + \text{CH}_3(\text{CH}_2)_2\text{CH}(\text{CH}_2)_9\text{CH}_3$ | 7.08 | -6.24      |
|     | H-R54 | $\text{H} + \text{CH}_3(\text{CH}_2)_{12}\text{CH}_3 \rightarrow \text{H}_2 + \text{CH}_3(\text{CH}_2)_3\text{CH}(\text{CH}_2)_8\text{CH}_3$ | 7.05 | -6.30      |

|     |       |                                                                                                                                                 |      |       |
|-----|-------|-------------------------------------------------------------------------------------------------------------------------------------------------|------|-------|
|     | H-R55 | $\text{H} + \text{CH}_3(\text{CH}_2)_{12}\text{CH}_3 \rightarrow \text{H}_2 + \text{CH}_3(\text{CH}_2)_4\text{CH}(\text{CH}_2)_7\text{CH}_3$    | 7.03 | -6.17 |
|     | H-R56 | $\text{H} + \text{CH}_3(\text{CH}_2)_{12}\text{CH}_3 \rightarrow \text{H}_2 + \text{CH}_3(\text{CH}_2)_5\text{CH}(\text{CH}_2)_6\text{CH}_3$    | 6.98 | -6.16 |
| C15 | H-R57 | $\text{H} + \text{CH}_3(\text{CH}_2)_{13}\text{CH}_3 \rightarrow \text{H}_2 + \text{CH}_2(\text{CH}_2)_{13}\text{CH}_3$                         | 9.82 | -3.71 |
|     | H-R58 | $\text{H} + \text{CH}_3(\text{CH}_2)_{13}\text{CH}_3 \rightarrow \text{H}_2 + \text{CH}_3\text{CH}(\text{CH}_2)_{12}\text{CH}_3$                | 7.19 | -6.46 |
|     | H-R59 | $\text{H} + \text{CH}_3(\text{CH}_2)_{13}\text{CH}_3 \rightarrow \text{H}_2 + \text{CH}_3\text{CH}_2\text{CH}(\text{CH}_2)_{11}\text{CH}_3$     | 7.11 | -6.19 |
|     | H-R60 | $\text{H} + \text{CH}_3(\text{CH}_2)_{13}\text{CH}_3 \rightarrow \text{H}_2 + \text{CH}_3(\text{CH}_2)_2\text{CH}(\text{CH}_2)_{10}\text{CH}_3$ | 7.08 | -6.24 |
|     | H-R61 | $\text{H} + \text{CH}_3(\text{CH}_2)_{13}\text{CH}_3 \rightarrow \text{H}_2 + \text{CH}_3(\text{CH}_2)_3\text{CH}(\text{CH}_2)_9\text{CH}_3$    | 7.01 | -6.34 |
|     | H-R62 | $\text{H} + \text{CH}_3(\text{CH}_2)_{13}\text{CH}_3 \rightarrow \text{H}_2 + \text{CH}_3(\text{CH}_2)_4\text{CH}(\text{CH}_2)_8\text{CH}_3$    | 7.01 | -6.33 |
|     | H-R63 | $\text{H} + \text{CH}_3(\text{CH}_2)_{13}\text{CH}_3 \rightarrow \text{H}_2 + \text{CH}_3(\text{CH}_2)_5\text{CH}(\text{CH}_2)_7\text{CH}_3$    | 6.95 | -6.34 |
|     | H-R64 | $\text{H} + \text{CH}_3(\text{CH}_2)_{13}\text{CH}_3 \rightarrow \text{H}_2 + \text{CH}_3(\text{CH}_2)_6\text{CH}(\text{CH}_2)_6\text{CH}_3$    | 6.93 | -6.26 |
| C16 | H-R65 | $\text{H} + \text{CH}_3(\text{CH}_2)_{14}\text{CH}_3 \rightarrow \text{H}_2 + \text{CH}_2(\text{CH}_2)_{14}\text{CH}_3$                         | 9.82 | -3.70 |
|     | H-R66 | $\text{H} + \text{CH}_3(\text{CH}_2)_{14}\text{CH}_3 \rightarrow \text{H}_2 + \text{CH}_3\text{CH}(\text{CH}_2)_{13}\text{CH}_3$                | 7.21 | -6.46 |
|     | H-R67 | $\text{H} + \text{CH}_3(\text{CH}_2)_{14}\text{CH}_3 \rightarrow \text{H}_2 + \text{CH}_3\text{CH}_2\text{CH}(\text{CH}_2)_{12}\text{CH}_3$     | 7.12 | -6.19 |
|     | H-R68 | $\text{H} + \text{CH}_3(\text{CH}_2)_{14}\text{CH}_3 \rightarrow \text{H}_2 + \text{CH}_3(\text{CH}_2)_2\text{CH}(\text{CH}_2)_{11}\text{CH}_3$ | 7.08 | -6.24 |
|     | H-R69 | $\text{H} + \text{CH}_3(\text{CH}_2)_{14}\text{CH}_3 \rightarrow \text{H}_2 + \text{CH}_3(\text{CH}_2)_3\text{CH}(\text{CH}_2)_{10}\text{CH}_3$ | 7.00 | -6.40 |
|     | H-R70 | $\text{H} + \text{CH}_3(\text{CH}_2)_{14}\text{CH}_3 \rightarrow \text{H}_2 + \text{CH}_3(\text{CH}_2)_4\text{CH}(\text{CH}_2)_9\text{CH}_3$    | 7.02 | -6.27 |
|     | H-R71 | $\text{H} + \text{CH}_3(\text{CH}_2)_{14}\text{CH}_3 \rightarrow \text{H}_2 + \text{CH}_3(\text{CH}_2)_5\text{CH}(\text{CH}_2)_8\text{CH}_3$    | 6.93 | -6.33 |
|     | H-R72 | $\text{H} + \text{CH}_3(\text{CH}_2)_{14}\text{CH}_3 \rightarrow \text{H}_2 + \text{CH}_3(\text{CH}_2)_6\text{CH}(\text{CH}_2)_7\text{CH}_3$    | 6.98 | -6.34 |

**Table S2.** The calculated results (EB and  $\Delta H$ ) for the hydrogen abstraction reactions of  $n\text{-C}_n\text{H}_{2n+2} + \text{OH}$  ( $n = 9\text{-}16$ ) using the ONIOM method (unit: kcal/mol).

|     | No.    | Reactions                                                                                                                                             | EB    | $\Delta H$ |
|-----|--------|-------------------------------------------------------------------------------------------------------------------------------------------------------|-------|------------|
| C9  | OH-R21 | $\text{OH} + \text{CH}_3(\text{CH}_2)_7\text{CH}_3 \rightarrow \text{H}_2\text{O} + \text{CH}_2(\text{CH}_2)_7\text{CH}_3$                            | 1.79  | -18.52     |
|     | OH-R22 | $\text{OH} + \text{CH}_3(\text{CH}_2)_7\text{CH}_3 \rightarrow \text{H}_2\text{O} + \text{CH}_3\text{CH}(\text{CH}_2)_6\text{CH}_3$                   | -0.32 | -21.59     |
|     | OH-R23 | $\text{OH} + \text{CH}_3(\text{CH}_2)_7\text{CH}_3 \rightarrow \text{H}_2\text{O} + \text{CH}_3\text{CH}_2\text{CH}(\text{CH}_2)_5\text{CH}_3$        | -0.43 | -20.91     |
|     | OH-R24 | $\text{OH} + \text{CH}_3(\text{CH}_2)_7\text{CH}_3 \rightarrow \text{H}_2\text{O} + \text{CH}_3(\text{CH}_2)_2\text{CH}(\text{CH}_2)_4\text{CH}_3$    | -0.39 | -21.12     |
|     | OH-R25 | $\text{OH} + \text{CH}_3(\text{CH}_2)_7\text{CH}_3 \rightarrow \text{H}_2\text{O} + \text{CH}_3(\text{CH}_2)_3\text{CH}(\text{CH}_2)_3\text{CH}_3$    | -0.67 | -21.00     |
| C10 | OH-R26 | $\text{OH} + \text{CH}_3(\text{CH}_2)_8\text{CH}_3 \rightarrow \text{H}_2\text{O} + \text{CH}_2(\text{CH}_2)_8\text{CH}_3$                            | 2.24  | -18.46     |
|     | OH-R27 | $\text{OH} + \text{CH}_3(\text{CH}_2)_8\text{CH}_3 \rightarrow \text{H}_2\text{O} + \text{CH}_3\text{CH}(\text{CH}_2)_7\text{CH}_3$                   | -0.50 | -21.26     |
|     | OH-R28 | $\text{OH} + \text{CH}_3(\text{CH}_2)_8\text{CH}_3 \rightarrow \text{H}_2\text{O} + \text{CH}_3\text{CH}_2\text{CH}(\text{CH}_2)_6\text{CH}_3$        | -0.52 | -21.06     |
|     | OH-R29 | $\text{OH} + \text{CH}_3(\text{CH}_2)_8\text{CH}_3 \rightarrow \text{H}_2\text{O} + \text{CH}_3(\text{CH}_2)_2\text{CH}(\text{CH}_2)_5\text{CH}_3$    | -1.13 | -20.85     |
|     | OH-R30 | $\text{OH} + \text{CH}_3(\text{CH}_2)_8\text{CH}_3 \rightarrow \text{H}_2\text{O} + \text{CH}_3(\text{CH}_2)_3\text{CH}(\text{CH}_2)_4\text{CH}_3$    | -0.49 | -21.12     |
| C11 | OH-R31 | $\text{OH} + \text{CH}_3(\text{CH}_2)_9\text{CH}_3 \rightarrow \text{H}_2\text{O} + \text{CH}_2(\text{CH}_2)_9\text{CH}_3$                            | 1.92  | -18.50     |
|     | OH-R32 | $\text{OH} + \text{CH}_3(\text{CH}_2)_9\text{CH}_3 \rightarrow \text{H}_2\text{O} + \text{CH}_3\text{CH}(\text{CH}_2)_8\text{CH}_3$                   | -0.52 | -21.52     |
|     | OH-R33 | $\text{OH} + \text{CH}_3(\text{CH}_2)_9\text{CH}_3 \rightarrow \text{H}_2\text{O} + \text{CH}_3\text{CH}_2\text{CH}(\text{CH}_2)_7\text{CH}_3$        | -0.59 | -20.85     |
|     | OH-R34 | $\text{OH} + \text{CH}_3(\text{CH}_2)_9\text{CH}_3 \rightarrow \text{H}_2\text{O} + \text{CH}_3(\text{CH}_2)_2\text{CH}(\text{CH}_2)_6\text{CH}_3$    | -0.53 | -21.31     |
|     | OH-R35 | $\text{OH} + \text{CH}_3(\text{CH}_2)_9\text{CH}_3 \rightarrow \text{H}_2\text{O} + \text{CH}_3(\text{CH}_2)_3\text{CH}(\text{CH}_2)_5\text{CH}_3$    | -1.20 | -21.38     |
|     | OH-R36 | $\text{OH} + \text{CH}_3(\text{CH}_2)_9\text{CH}_3 \rightarrow \text{H}_2\text{O} + \text{CH}_3(\text{CH}_2)_4\text{CH}(\text{CH}_2)_4\text{CH}_3$    | -0.52 | -21.47     |
| C12 | OH-R37 | $\text{OH} + \text{CH}_3(\text{CH}_2)_{10}\text{CH}_3 \rightarrow \text{H}_2\text{O} + \text{CH}_2(\text{CH}_2)_{10}\text{CH}_3$                      | 1.80  | -18.47     |
|     | OH-R38 | $\text{OH} + \text{CH}_3(\text{CH}_2)_{10}\text{CH}_3 \rightarrow \text{H}_2\text{O} + \text{CH}_3\text{CH}(\text{CH}_2)_9\text{CH}_3$                | -0.78 | -21.29     |
|     | OH-R39 | $\text{OH} + \text{CH}_3(\text{CH}_2)_{10}\text{CH}_3 \rightarrow \text{H}_2\text{O} + \text{CH}_3\text{CH}_2\text{CH}(\text{CH}_2)_8\text{CH}_3$     | -0.91 | -20.92     |
|     | OH-R40 | $\text{OH} + \text{CH}_3(\text{CH}_2)_{10}\text{CH}_3 \rightarrow \text{H}_2\text{O} + \text{CH}_3(\text{CH}_2)_2\text{CH}(\text{CH}_2)_7\text{CH}_3$ | -1.29 | -20.84     |
|     | OH-R41 | $\text{OH} + \text{CH}_3(\text{CH}_2)_{10}\text{CH}_3 \rightarrow \text{H}_2\text{O} + \text{CH}_3(\text{CH}_2)_3\text{CH}(\text{CH}_2)_6\text{CH}_3$ | -0.56 | -21.27     |
|     | OH-R42 | $\text{OH} + \text{CH}_3(\text{CH}_2)_{10}\text{CH}_3 \rightarrow \text{H}_2\text{O} + \text{CH}_3(\text{CH}_2)_4\text{CH}(\text{CH}_2)_5\text{CH}_3$ | -0.63 | -21.20     |
| C13 | OH-R43 | $\text{OH} + \text{CH}_3(\text{CH}_2)_{11}\text{CH}_3 \rightarrow \text{H}_2\text{O} + \text{CH}_2(\text{CH}_2)_{11}\text{CH}_3$                      | 1.84  | -18.48     |
|     | OH-R44 | $\text{OH} + \text{CH}_3(\text{CH}_2)_{11}\text{CH}_3 \rightarrow \text{H}_2\text{O} + \text{CH}_3\text{CH}(\text{CH}_2)_{10}\text{CH}_3$             | -0.73 | -21.46     |
|     | OH-R45 | $\text{OH} + \text{CH}_3(\text{CH}_2)_{11}\text{CH}_3 \rightarrow \text{H}_2\text{O} + \text{CH}_3\text{CH}_2\text{CH}(\text{CH}_2)_9\text{CH}_3$     | -1.33 | -20.83     |
|     | OH-R46 | $\text{OH} + \text{CH}_3(\text{CH}_2)_{11}\text{CH}_3 \rightarrow \text{H}_2\text{O} + \text{CH}_3(\text{CH}_2)_2\text{CH}(\text{CH}_2)_8\text{CH}_3$ | -1.18 | -21.04     |
|     | OH-R47 | $\text{OH} + \text{CH}_3(\text{CH}_2)_{11}\text{CH}_3 \rightarrow \text{H}_2\text{O} + \text{CH}_3(\text{CH}_2)_3\text{CH}(\text{CH}_2)_7\text{CH}_3$ | -1.41 | -21.49     |
|     | OH-R48 | $\text{OH} + \text{CH}_3(\text{CH}_2)_{11}\text{CH}_3 \rightarrow \text{H}_2\text{O} + \text{CH}_3(\text{CH}_2)_4\text{CH}(\text{CH}_2)_6\text{CH}_3$ | -1.06 | -21.36     |
|     | OH-R49 | $\text{OH} + \text{CH}_3(\text{CH}_2)_{11}\text{CH}_3 \rightarrow \text{H}_2\text{O} + \text{CH}_3(\text{CH}_2)_5\text{CH}(\text{CH}_2)_5\text{CH}_3$ | -1.00 | -21.48     |
| C14 | OH-R50 | $\text{OH} + \text{CH}_3(\text{CH}_2)_{12}\text{CH}_3 \rightarrow \text{H}_2\text{O} + \text{CH}_2(\text{CH}_2)_{12}\text{CH}_3$                      | 2.17  | -18.47     |
|     | OH-R51 | $\text{OH} + \text{CH}_3(\text{CH}_2)_{12}\text{CH}_3 \rightarrow \text{H}_2\text{O} + \text{CH}_3\text{CH}(\text{CH}_2)_{11}\text{CH}_3$             | -1.06 | -21.30     |
|     | OH-R52 | $\text{OH} + \text{CH}_3(\text{CH}_2)_{12}\text{CH}_3 \rightarrow \text{H}_2\text{O} + \text{CH}_3\text{CH}_2\text{CH}(\text{CH}_2)_{10}\text{CH}_3$  | -1.16 | -20.87     |

|     |        |                                                                                                                                                              |       |        |
|-----|--------|--------------------------------------------------------------------------------------------------------------------------------------------------------------|-------|--------|
|     | OH-R53 | $\text{OH} + \text{CH}_3(\text{CH}_2)_{12}\text{CH}_3 \rightarrow \text{H}_2\text{O} + \text{CH}_3(\text{CH}_2)_2\text{CH}(\text{CH}_2)_9\text{CH}_3$        | -1.36 | -20.91 |
|     | OH-R54 | $\text{OH} + \text{CH}_3(\text{CH}_2)_{12}\text{CH}_3 \rightarrow \text{H}_2\text{O} + \text{CH}_3(\text{CH}_2)_3\text{CH}(\text{CH}_2)_8\text{CH}_3$        | -1.19 | -21.43 |
|     | OH-R55 | $\text{OH} + \text{CH}_3(\text{CH}_2)_{12}\text{CH}_3 \rightarrow \text{H}_2\text{O} + \text{CH}_3(\text{CH}_2)_4\text{CH}(\text{CH}_2)_7\text{CH}_3$        | -1.27 | -21.25 |
|     | OH-R56 | $\text{OH} + \text{CH}_3(\text{CH}_2)_{12}\text{CH}_3 \rightarrow \text{H}_2\text{O} + \text{CH}_3(\text{CH}_2)_5\text{CH}(\text{CH}_2)_6\text{CH}_3$        | -1.21 | -21.48 |
| C15 | OH-R57 | $\text{OH} + \text{CH}_3(\text{CH}_2)_{13}\text{CH}_3 \rightarrow \text{H}_2\text{O} + \text{CH}_2(\text{CH}_2)_{13}\text{CH}_3$                             | 2.04  | -18.47 |
|     | OH-R58 | $\text{OH} + \text{CH}_3(\text{CH}_2)_{13}\text{CH}_3 \rightarrow \text{H}_2\text{O} + \text{CH}_3\text{CH}(\text{CH}_2)_{12}\text{CH}_3$                    | -0.98 | -21.40 |
|     | OH-R59 | $\text{OH} + \text{CH}_3(\text{CH}_2)_{13}\text{CH}_3 \rightarrow \text{H}_2\text{O} + \text{CH}_3\text{CH}_2\text{CH}(\text{CH}_2)_{11}\text{CH}_3$         | -1.57 | -20.82 |
|     | OH-R60 | $\text{OH} + \text{CH}_3(\text{CH}_2)_{13}\text{CH}_3 \rightarrow \text{H}_2\text{O} + \text{CH}_3(\text{CH}_2)_2\text{CH}(\text{CH}_2)_{10}\text{CH}_3$     | -1.24 | -20.94 |
|     | OH-R61 | $\text{OH} + \text{CH}_3(\text{CH}_2)_{13}\text{CH}_3 \rightarrow \text{H}_2\text{O} + \text{CH}_3(\text{CH}_2)_3\text{CH}(\text{CH}_2)_9\text{CH}_3$        | -1.53 | -21.60 |
|     | OH-R62 | $\text{OH} + \text{CH}_3(\text{CH}_2)_{13}\text{CH}_3 \rightarrow \text{H}_2\text{O} + \text{CH}_3(\text{CH}_2)_4\text{CH}(\text{CH}_2)_8\text{CH}_3$        | -1.06 | -21.59 |
|     | OH-R63 | $\text{OH} + \text{CH}_3(\text{CH}_2)_{13}\text{CH}_3 \rightarrow \text{H}_2\text{O} + \text{CH}_3(\text{CH}_2)_5\text{CH}(\text{CH}_2)_7\text{CH}_3$        | -1.45 | -21.57 |
|     | OH-R64 | $\text{OH} + \text{CH}_3(\text{CH}_2)_{13}\text{CH}_3 \rightarrow \text{H}_2\text{O} + \text{CH}_3(\text{CH}_2)_6\text{CH}(\text{CH}_2)_6\text{CH}_3$        | -1.06 | -21.57 |
| C16 | OH-R65 | $\text{OH} + \text{CH}_3(\text{CH}_2)_{14}\text{CH}_3 \rightarrow \text{H}_2\text{O} + \text{CH}_2(\text{CH}_2)_{14}\text{CH}_3$                             | 2.17  | -19.35 |
|     | OH-R66 | $\text{OH} + \text{CH}_3(\text{CH}_2)_{14}\text{CH}_3 \rightarrow \text{H}_2\text{O} + \text{CH}_3\text{CH}(\text{CH}_2)_{13}\text{CH}_3$                    | -0.96 | -21.29 |
|     | OH-R67 | $\text{OH} + \text{CH}_3(\text{CH}_2)_{14}\text{CH}_3 \rightarrow \text{H}_2\text{O} + \text{CH}_3\text{CH}_2\text{CH}(\text{CH}_2)_{12}\text{CH}_3$         | -1.40 | -20.84 |
|     | OH-R68 | $\text{HO}_2 + \text{CH}_3(\text{CH}_2)_{14}\text{CH}_3 \rightarrow \text{H}_2\text{O}_2 + \text{CH}_3(\text{CH}_2)_2\text{CH}(\text{CH}_2)_{11}\text{CH}_3$ | -1.48 | -21.00 |
|     | OH-R69 | $\text{HO}_2 + \text{CH}_3(\text{CH}_2)_{14}\text{CH}_3 \rightarrow \text{H}_2\text{O}_2 + \text{CH}_3(\text{CH}_2)_3\text{CH}(\text{CH}_2)_{10}\text{CH}_3$ | -1.31 | -21.98 |
|     | OH-R70 | $\text{HO}_2 + \text{CH}_3(\text{CH}_2)_{14}\text{CH}_3 \rightarrow \text{H}_2\text{O}_2 + \text{CH}_3(\text{CH}_2)_4\text{CH}(\text{CH}_2)_9\text{CH}_3$    | -1.26 | -21.18 |
|     | OH-R71 | $\text{HO}_2 + \text{CH}_3(\text{CH}_2)_{14}\text{CH}_3 \rightarrow \text{H}_2\text{O}_2 + \text{CH}_3(\text{CH}_2)_5\text{CH}(\text{CH}_2)_8\text{CH}_3$    | -1.24 | -21.54 |
|     | OH-R72 | $\text{HO}_2 + \text{CH}_3(\text{CH}_2)_{14}\text{CH}_3 \rightarrow \text{H}_2\text{O}_2 + \text{CH}_3(\text{CH}_2)_6\text{CH}(\text{CH}_2)_7\text{CH}_3$    | -1.31 | -21.62 |



**Table S3.** The calculated results (EB and  $\Delta H$ ) for the hydrogen abstraction reactions of  $n\text{-C}_n\text{H}_{2n+2} + \text{HO}_2$  ( $n = 8\text{-}16$ ) using the ONIOM method (unit: kcal/mol).

|     | No.                  | Reactions                                                                                                                                                          | EB    | $\Delta H$ |
|-----|----------------------|--------------------------------------------------------------------------------------------------------------------------------------------------------------------|-------|------------|
| C8  | HO <sub>2</sub> -R17 | $\text{HO}_2 + \text{CH}_3(\text{CH}_2)_6\text{CH}_3 \rightarrow \text{H}_2\text{O}_2 + \text{CH}_2(\text{CH}_2)_6\text{CH}_3$                                     | 19.46 | 13.63      |
|     | HO <sub>2</sub> -R18 | $\text{HO}_2 + \text{CH}_3(\text{CH}_2)_6\text{CH}_3 \rightarrow \text{H}_2\text{O}_2 + \text{CH}_3\text{CH}(\text{CH}_2)_5\text{CH}_3$                            | 16.52 | 10.86      |
|     | HO <sub>2</sub> -R19 | $\text{HO}_2 + \text{CH}_3(\text{CH}_2)_6\text{CH}_3 \rightarrow \text{H}_2\text{O}_2 + \text{CH}_3\text{CH}_2\text{CH}(\text{CH}_2)_4\text{CH}_3$                 | 16.46 | 11.16      |
|     | HO <sub>2</sub> -R20 | $\text{HO}_2 + \text{CH}_3(\text{CH}_2)_6\text{CH}_3 \rightarrow \text{H}_2\text{O}_2 + \text{CH}_3(\text{CH}_2)_2\text{CH}(\text{CH}_2)_3\text{CH}_3$             | 15.85 | 11.10      |
| C9  | HO <sub>2</sub> -R21 | $\text{HO}_2 + \text{CH}_3(\text{CH}_2)_7\text{CH}_3 \rightarrow \text{H}_2\text{O}_2 + \text{CH}_2(\text{CH}_2)_7\text{CH}_3$                                     | 19.45 | 13.63      |
|     | HO <sub>2</sub> -R22 | $\text{HO}_2 + \text{CH}_3(\text{CH}_2)_7\text{CH}_3 \rightarrow \text{H}_2\text{O}_2 + \text{CH}_3\text{CH}(\text{CH}_2)_6\text{CH}_3$                            | 16.44 | 10.87      |
|     | HO <sub>2</sub> -R23 | $\text{HO}_2 + \text{CH}_3(\text{CH}_2)_7\text{CH}_3 \rightarrow \text{H}_2\text{O}_2 + \text{CH}_3\text{CH}_2\text{CH}(\text{CH}_2)_5\text{CH}_3$                 | 16.26 | 11.16      |
|     | HO <sub>2</sub> -R24 | $\text{HO}_2 + \text{CH}_3(\text{CH}_2)_7\text{CH}_3 \rightarrow \text{H}_2\text{O}_2 + \text{CH}_3(\text{CH}_2)_2\text{CH}(\text{CH}_2)_4\text{CH}_3$             | 15.92 | 11.09      |
|     | HO <sub>2</sub> -R25 | $\text{HO}_2 + \text{CH}_3(\text{CH}_2)_7\text{CH}_3 \rightarrow \text{H}_2\text{O}_2 + \text{CH}_3(\text{CH}_2)_3\text{CH}(\text{CH}_2)_3\text{CH}_3$             | 15.74 | 11.12      |
| C10 | HO <sub>2</sub> -R26 | $\text{HO}_2 + \text{CH}_3(\text{CH}_2)_8\text{CH}_3 \rightarrow \text{H}_2\text{O}_2 + \text{CH}_2(\text{CH}_2)_8\text{CH}_3$                                     | 19.47 | 13.64      |
|     | HO <sub>2</sub> -R27 | $\text{HO}_2 + \text{CH}_3(\text{CH}_2)_8\text{CH}_3 \rightarrow \text{H}_2\text{O}_2 + \text{CH}_3\text{CH}(\text{CH}_2)_7\text{CH}_3$                            | 16.20 | 10.87      |
|     | HO <sub>2</sub> -R28 | $\text{HO}_2 + \text{CH}_3(\text{CH}_2)_8\text{CH}_3 \rightarrow \text{H}_2\text{O}_2 + \text{CH}_3\text{CH}_2\text{CH}(\text{CH}_2)_6\text{CH}_3$                 | 15.92 | 11.15      |
|     | HO <sub>2</sub> -R29 | $\text{HO}_2 + \text{CH}_3(\text{CH}_2)_8\text{CH}_3 \rightarrow \text{H}_2\text{O}_2 + \text{CH}_3(\text{CH}_2)_2\text{CH}(\text{CH}_2)_5\text{CH}_3$             | 15.79 | 11.09      |
|     | HO <sub>2</sub> -R30 | $\text{HO}_2 + \text{CH}_3(\text{CH}_2)_8\text{CH}_3 \rightarrow \text{H}_2\text{O}_2 + \text{CH}_3(\text{CH}_2)_3\text{CH}(\text{CH}_2)_4\text{CH}_3$             | 16.28 | 11.07      |
| C11 | HO <sub>2</sub> -R31 | $\text{HO}_2 + \text{CH}_3(\text{CH}_2)_9\text{CH}_3 \rightarrow \text{H}_2\text{O}_2 + \text{CH}_2(\text{CH}_2)_9\text{CH}_3$                                     | 19.55 | 13.63      |
|     | HO <sub>2</sub> -R32 | $\text{HO}_2 + \text{CH}_3(\text{CH}_2)_9\text{CH}_3 \rightarrow \text{H}_2\text{O}_2 + \text{CH}_3\text{CH}(\text{CH}_2)_8\text{CH}_3$                            | 16.15 | 10.87      |
|     | HO <sub>2</sub> -R33 | $\text{HO}_2 + \text{CH}_3(\text{CH}_2)_9\text{CH}_3 \rightarrow \text{H}_2\text{O}_2 + \text{H}_2 + \text{CH}_3\text{CH}_2\text{CH}(\text{CH}_2)_7\text{CH}_3$    | 16.28 | 11.15      |
|     | HO <sub>2</sub> -R34 | $\text{HO}_2 + \text{CH}_3(\text{CH}_2)_9\text{CH}_3 \rightarrow \text{H}_2\text{O}_2 + \text{CH}_3(\text{CH}_2)_2\text{CH}(\text{CH}_2)_6\text{CH}_3$             | 15.78 | 11.08      |
|     | HO <sub>2</sub> -R35 | $\text{HO}_2 + \text{CH}_3(\text{CH}_2)_9\text{CH}_3 \rightarrow \text{H}_2\text{O}_2 + \text{CH}_3(\text{CH}_2)_3\text{CH}(\text{CH}_2)_5\text{CH}_3$             | 16.20 | 11.09      |
|     | HO <sub>2</sub> -R36 | $\text{HO}_2 + \text{CH}_3(\text{CH}_2)_9\text{CH}_3 \rightarrow \text{H}_2\text{O}_2 + \text{CH}_3(\text{CH}_2)_4\text{CH}(\text{CH}_2)_4\text{CH}_3$             | 15.74 | 11.02      |
| C12 | HO <sub>2</sub> -R37 | $\text{HO}_2 + \text{CH}_3(\text{CH}_2)_{10}\text{CH}_3 \rightarrow \text{H}_2\text{O}_2 + \text{CH}_2(\text{CH}_2)_{10}\text{CH}_3$                               | 19.55 | 13.64      |
|     | HO <sub>2</sub> -R38 | $\text{HO}_2 + \text{CH}_3(\text{CH}_2)_{10}\text{CH}_3 \rightarrow \text{H}_2\text{O}_2 + \text{CH}_3\text{CH}(\text{CH}_2)_9\text{CH}_3$                         | 16.58 | 10.88      |
|     | HO <sub>2</sub> -R39 | $\text{HO}_2 + \text{CH}_3(\text{CH}_2)_{10}\text{CH}_3 \rightarrow \text{H}_2\text{O}_2 + \text{H}_2 + \text{CH}_3\text{CH}_2\text{CH}(\text{CH}_2)_8\text{CH}_3$ | 15.88 | 11.15      |
|     | HO <sub>2</sub> -R40 | $\text{HO}_2 + \text{CH}_3(\text{CH}_2)_{10}\text{CH}_3 \rightarrow \text{H}_2\text{O}_2 + \text{CH}_3(\text{CH}_2)_2\text{CH}(\text{CH}_2)_7\text{CH}_3$          | 15.74 | 11.09      |
|     | HO <sub>2</sub> -R41 | $\text{HO}_2 + \text{CH}_3(\text{CH}_2)_{10}\text{CH}_3 \rightarrow \text{H}_2\text{O}_2 + \text{CH}_3(\text{CH}_2)_3\text{CH}(\text{CH}_2)_6\text{CH}_3$          | 15.45 | 11.06      |
|     | HO <sub>2</sub> -R42 | $\text{HO}_2 + \text{CH}_3(\text{CH}_2)_{10}\text{CH}_3 \rightarrow \text{H}_2\text{O}_2 + \text{CH}_3(\text{CH}_2)_4\text{CH}(\text{CH}_2)_5\text{CH}_3$          | 16.07 | 11.05      |
| C13 | HO <sub>2</sub> -R43 | $\text{HO}_2 + \text{CH}_3(\text{CH}_2)_{11}\text{CH}_3 \rightarrow \text{H}_2\text{O}_2 + \text{CH}_2(\text{CH}_2)_{11}\text{CH}_3$                               | 19.56 | 13.62      |
|     | HO <sub>2</sub> -R44 | $\text{HO}_2 + \text{CH}_3(\text{CH}_2)_{11}\text{CH}_3 \rightarrow \text{H}_2\text{O}_2 + \text{CH}_3\text{CH}(\text{CH}_2)_{10}\text{CH}_3$                      | 16.31 | 10.85      |
|     | HO <sub>2</sub> -R45 | $\text{HO}_2 + \text{CH}_3(\text{CH}_2)_{11}\text{CH}_3 \rightarrow \text{H}_2\text{O}_2 + \text{H}_2 + \text{CH}_3\text{CH}_2\text{CH}(\text{CH}_2)_9\text{CH}_3$ | 15.81 | 11.13      |
|     | HO <sub>2</sub> -R46 | $\text{HO}_2 + \text{CH}_3(\text{CH}_2)_{11}\text{CH}_3 \rightarrow \text{H}_2\text{O}_2 + \text{CH}_3(\text{CH}_2)_2\text{CH}(\text{CH}_2)_8\text{CH}_3$          | 16.19 | 11.06      |
|     | HO <sub>2</sub> -R47 | $\text{HO}_2 + \text{CH}_3(\text{CH}_2)_{11}\text{CH}_3 \rightarrow \text{H}_2\text{O}_2 + \text{CH}_3(\text{CH}_2)_3\text{CH}(\text{CH}_2)_7\text{CH}_3$          | 15.62 | 11.08      |
|     | HO <sub>2</sub> -R48 | $\text{HO}_2 + \text{CH}_3(\text{CH}_2)_{11}\text{CH}_3 \rightarrow \text{H}_2\text{O}_2 + \text{CH}_3(\text{CH}_2)_4\text{CH}(\text{CH}_2)_6\text{CH}_3$          | 16.14 | 10.97      |
|     | HO <sub>2</sub> -R49 | $\text{HO}_2 + \text{CH}_3(\text{CH}_2)_{11}\text{CH}_3 \rightarrow \text{H}_2\text{O}_2 + \text{CH}_3(\text{CH}_2)_5\text{CH}(\text{CH}_2)_5\text{CH}_3$          | 15.45 | 11.16      |

|     |                      |                                                                                                                                                                       |       |       |
|-----|----------------------|-----------------------------------------------------------------------------------------------------------------------------------------------------------------------|-------|-------|
| C14 | HO <sub>2</sub> -R50 | $\text{HO}_2 + \text{CH}_3(\text{CH}_2)_{12}\text{CH}_3 \rightarrow \text{H}_2\text{O}_2 + \text{CH}_2(\text{CH}_2)_{12}\text{CH}_3$                                  | 19.00 | 13.64 |
|     | HO <sub>2</sub> -R51 | $\text{HO}_2 + \text{CH}_3(\text{CH}_2)_{12}\text{CH}_3 \rightarrow \text{H}_2\text{O}_2 + \text{CH}_3\text{CH}(\text{CH}_2)_{11}\text{CH}_3$                         | 16.42 | 10.88 |
|     | HO <sub>2</sub> -R52 | $\text{HO}_2 + \text{CH}_3(\text{CH}_2)_{12}\text{CH}_3 \rightarrow \text{H}_2\text{O}_2 + \text{H}_2 + \text{CH}_3\text{CH}_2\text{CH}(\text{CH}_2)_{10}\text{CH}_3$ | 15.68 | 11.15 |
|     | HO <sub>2</sub> -R53 | $\text{HO}_2 + \text{CH}_3(\text{CH}_2)_{12}\text{CH}_3 \rightarrow \text{H}_2\text{O}_2 + \text{CH}_3(\text{CH}_2)_2\text{CH}(\text{CH}_2)_9\text{CH}_3$             | 16.20 | 11.10 |
|     | HO <sub>2</sub> -R54 | $\text{HO}_2 + \text{CH}_3(\text{CH}_2)_{12}\text{CH}_3 \rightarrow \text{H}_2\text{O}_2 + \text{CH}_3(\text{CH}_2)_3\text{CH}(\text{CH}_2)_8\text{CH}_3$             | 15.61 | 11.04 |
|     | HO <sub>2</sub> -R55 | $\text{HO}_2 + \text{CH}_3(\text{CH}_2)_{12}\text{CH}_3 \rightarrow \text{H}_2\text{O}_2 + \text{CH}_3(\text{CH}_2)_4\text{CH}(\text{CH}_2)_7\text{CH}_3$             | 16.16 | 11.17 |
|     | HO <sub>2</sub> -R56 | $\text{HO}_2 + \text{CH}_3(\text{CH}_2)_{12}\text{CH}_3 \rightarrow \text{H}_2\text{O}_2 + \text{CH}_3(\text{CH}_2)_5\text{CH}(\text{CH}_2)_6\text{CH}_3$             | 15.68 | 11.18 |
| C15 | HO <sub>2</sub> -R57 | $\text{HO}_2 + \text{CH}_3(\text{CH}_2)_{13}\text{CH}_3 \rightarrow \text{H}_2\text{O}_2 + \text{CH}_2(\text{CH}_2)_{13}\text{CH}_3$                                  | 19.69 | 13.63 |
|     | HO <sub>2</sub> -R58 | $\text{HO}_2 + \text{CH}_3(\text{CH}_2)_{13}\text{CH}_3 \rightarrow \text{H}_2\text{O}_2 + \text{CH}_3\text{CH}(\text{CH}_2)_{12}\text{CH}_3$                         | 16.25 | 10.87 |
|     | HO <sub>2</sub> -R59 | $\text{HO}_2 + \text{CH}_3(\text{CH}_2)_{13}\text{CH}_3 \rightarrow \text{H}_2\text{O}_2 + \text{H}_2 + \text{CH}_3\text{CH}_2\text{CH}(\text{CH}_2)_{11}\text{CH}_3$ | 15.64 | 11.15 |
|     | HO <sub>2</sub> -R60 | $\text{HO}_2 + \text{CH}_3(\text{CH}_2)_{13}\text{CH}_3 \rightarrow \text{H}_2\text{O}_2 + \text{CH}_3(\text{CH}_2)_2\text{CH}(\text{CH}_2)_{10}\text{CH}_3$          | 16.23 | 11.10 |
|     | HO <sub>2</sub> -R61 | $\text{HO}_2 + \text{CH}_3(\text{CH}_2)_{13}\text{CH}_3 \rightarrow \text{H}_2\text{O}_2 + \text{CH}_3(\text{CH}_2)_3\text{CH}(\text{CH}_2)_9\text{CH}_3$             | 15.58 | 11.00 |
|     | HO <sub>2</sub> -R62 | $\text{HO}_2 + \text{CH}_3(\text{CH}_2)_{13}\text{CH}_3 \rightarrow \text{H}_2\text{O}_2 + \text{CH}_3(\text{CH}_2)_4\text{CH}(\text{CH}_2)_8\text{CH}_3$             | 16.05 | 11.01 |
|     | HO <sub>2</sub> -R63 | $\text{HO}_2 + \text{CH}_3(\text{CH}_2)_{13}\text{CH}_3 \rightarrow \text{H}_2\text{O}_2 + \text{CH}_3(\text{CH}_2)_5\text{CH}(\text{CH}_2)_7\text{CH}_3$             | 15.65 | 11.00 |
|     | HO <sub>2</sub> -R64 | $\text{HO}_2 + \text{CH}_3(\text{CH}_2)_{13}\text{CH}_3 \rightarrow \text{H}_2\text{O}_2 + \text{CH}_3(\text{CH}_2)_6\text{CH}(\text{CH}_2)_6\text{CH}_3$             | 16.20 | 11.08 |
| C16 | HO <sub>2</sub> -R65 | $\text{HO}_2 + \text{CH}_3(\text{CH}_2)_{14}\text{CH}_3 \rightarrow \text{H}_2\text{O}_2 + \text{CH}_2(\text{CH}_2)_{14}\text{CH}_3$                                  | 19.36 | 13.64 |
|     | HO <sub>2</sub> -R66 | $\text{HO}_2 + \text{CH}_3(\text{CH}_2)_{14}\text{CH}_3 \rightarrow \text{H}_2\text{O}_2 + \text{CH}_3\text{CH}(\text{CH}_2)_{13}\text{CH}_3$                         | 16.54 | 10.88 |
|     | HO <sub>2</sub> -R67 | $\text{HO}_2 + \text{CH}_3(\text{CH}_2)_{14}\text{CH}_3 \rightarrow \text{H}_2\text{O}_2 + \text{H}_2 + \text{CH}_3\text{CH}_2\text{CH}(\text{CH}_2)_{12}\text{CH}_3$ | 15.66 | 11.15 |
|     | HO <sub>2</sub> -R68 | $\text{HO}_2 + \text{CH}_3(\text{CH}_2)_{14}\text{CH}_3 \rightarrow \text{H}_2\text{O}_2 + \text{CH}_3(\text{CH}_2)_2\text{CH}(\text{CH}_2)_{11}\text{CH}_3$          | 16.05 | 11.10 |
|     | HO <sub>2</sub> -R69 | $\text{HO}_2 + \text{CH}_3(\text{CH}_2)_{14}\text{CH}_3 \rightarrow \text{H}_2\text{O}_2 + \text{CH}_3(\text{CH}_2)_3\text{CH}(\text{CH}_2)_{10}\text{CH}_3$          | 15.45 | 10.94 |
|     | HO <sub>2</sub> -R70 | $\text{HO}_2 + \text{CH}_3(\text{CH}_2)_{14}\text{CH}_3 \rightarrow \text{H}_2\text{O}_2 + \text{CH}_3(\text{CH}_2)_4\text{CH}(\text{CH}_2)_9\text{CH}_3$             | 16.09 | 11.07 |
|     | HO <sub>2</sub> -R71 | $\text{HO}_2 + \text{CH}_3(\text{CH}_2)_{14}\text{CH}_3 \rightarrow \text{H}_2\text{O}_2 + \text{CH}_3(\text{CH}_2)_5\text{CH}(\text{CH}_2)_8\text{CH}_3$             | 15.56 | 11.01 |
|     | HO <sub>2</sub> -R72 | $\text{HO}_2 + \text{CH}_3(\text{CH}_2)_{14}\text{CH}_3 \rightarrow \text{H}_2\text{O}_2 + \text{CH}_3(\text{CH}_2)_6\text{CH}(\text{CH}_2)_7\text{CH}_3$             | 15.98 | 11.00 |

### 3. Cartesian coordinates for all optimized geometries at the B3LYP/6-311++G(d,p) level

#### 2.1 Hydrogen abstraction reaction of $n$ -C<sub>n</sub>H<sub>2n+2</sub> (n = 1-16) by H radical

##### 2.1.1 C1 (CH<sub>4</sub>)

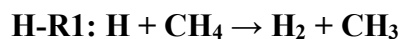

##### **H<sub>2</sub>**

|   |            |            |             |
|---|------------|------------|-------------|
| H | 0.00000000 | 0.00000000 | 0.37207600  |
| H | 0.00000000 | 0.00000000 | -0.37207600 |

##### **CH<sub>4</sub>**

|   |             |             |             |
|---|-------------|-------------|-------------|
| C | 0.00000000  | 0.00000000  | 0.00000000  |
| H | 0.62967300  | 0.62967300  | 0.62967300  |
| H | -0.62967300 | -0.62967300 | 0.62967300  |
| H | -0.62967300 | 0.62967300  | -0.62967300 |
| H | 0.62967300  | -0.62967300 | -0.62967300 |

##### **CH<sub>3</sub>**

|   |             |             |             |
|---|-------------|-------------|-------------|
| C | 0.00000000  | 0.00000000  | 0.00001800  |
| H | 0.00000000  | 1.08065300  | -0.00003700 |
| H | -0.93587300 | -0.54032600 | -0.00003700 |
| H | 0.93587300  | -0.54032600 | -0.00003700 |

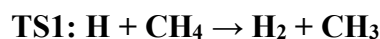

|   |             |             |             |
|---|-------------|-------------|-------------|
| C | -0.27220900 | -0.00001500 | -0.00003000 |
| H | -0.51369100 | -0.71133900 | -0.78411700 |
| H | 1.14354600  | 0.00045000  | 0.00080100  |
| H | -0.51487100 | 1.03437400  | -0.22422700 |
| H | -0.51544100 | -0.32336800 | 1.00763900  |
| H | 2.03371000  | -0.00002700 | 0.00008400  |

##### 2.1.2 C2 (C<sub>2</sub>H<sub>6</sub>)

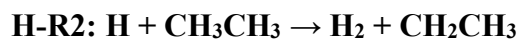

##### **C<sub>2</sub>H<sub>6</sub>**

|   |             |             |             |
|---|-------------|-------------|-------------|
| C | 0.00000000  | 0.00000000  | 0.76536300  |
| H | 0.50903500  | 0.88239000  | 1.16386300  |
| H | 0.50965500  | -0.88203200 | 1.16386300  |
| H | -1.01869000 | -0.00035800 | 1.16386300  |
| C | 0.00000000  | 0.00000000  | -0.76536300 |
| H | 1.01869000  | -0.00035800 | -1.16386300 |
| H | -0.50965500 | -0.88203200 | -1.16386300 |

|   |             |            |             |
|---|-------------|------------|-------------|
| H | -0.50903500 | 0.88239000 | -1.16386300 |
|---|-------------|------------|-------------|

### CH<sub>2</sub>CH<sub>3</sub>

|   |             |             |             |
|---|-------------|-------------|-------------|
| C | -0.69339800 | 0.00000000  | -0.00203400 |
| H | -1.09320700 | -0.00001300 | 1.02570600  |
| H | -1.10669100 | -0.88657600 | -0.49273000 |
| H | -1.10669100 | 0.88658800  | -0.49270900 |
| C | 0.79402900  | 0.00000000  | -0.01799900 |
| H | 1.35140100  | -0.92666800 | 0.03996600  |
| H | 1.35140300  | 0.92666700  | 0.03996600  |

### TS2: H + CH<sub>3</sub>CH<sub>3</sub> → H<sub>2</sub> + CH<sub>2</sub>CH<sub>3</sub>

|   |             |             |             |
|---|-------------|-------------|-------------|
| C | -0.83757200 | 0.13118800  | 0.00000100  |
| H | -1.53770600 | -0.71366500 | -0.00136000 |
| H | -1.05674800 | 0.73611200  | -0.88401600 |
| H | -1.05748800 | 0.73389400  | 0.88535600  |
| C | 0.59118000  | -0.35114500 | 0.00000900  |
| H | 0.92251800  | -0.86003800 | -0.90454800 |
| H | 1.38656100  | 0.75505700  | -0.00030000 |
| H | 0.92263800  | -0.85955400 | 0.90479500  |
| H | 1.89857300  | 1.52793700  | 0.00001700  |

## 2.1.3 C3 (C<sub>3</sub>H<sub>8</sub>)

### H-R3: H + CH<sub>3</sub>CH<sub>2</sub>CH<sub>3</sub> → H<sub>2</sub> + CH<sub>2</sub>CH<sub>2</sub>CH<sub>3</sub>

#### C<sub>3</sub>H<sub>8</sub>

|   |             |             |             |
|---|-------------|-------------|-------------|
| C | 1.27718800  | -0.25966800 | 0.00000100  |
| H | 1.32215700  | -0.90561700 | -0.88298000 |
| H | 1.32226900  | -0.90542700 | 0.88311300  |
| H | 2.17408400  | 0.36654000  | -0.00012500 |
| C | 0.00000000  | 0.58583200  | 0.00000000  |
| H | 0.00000000  | 1.24503000  | 0.87572500  |
| H | 0.00000100  | 1.24500600  | -0.87574200 |
| C | -1.27718800 | -0.25966800 | 0.00000000  |
| H | -1.32221900 | -0.90550400 | 0.88305900  |
| H | -2.17408400 | 0.36654000  | -0.00001800 |
| H | -1.32220700 | -0.90553900 | -0.88303400 |

#### CH<sub>2</sub>CH<sub>2</sub>CH<sub>3</sub>

|   |             |             |             |
|---|-------------|-------------|-------------|
| C | -1.22868000 | -0.24244200 | -0.03623100 |
| H | -1.28758600 | -0.98559200 | 0.76478900  |
| H | -1.30416800 | -0.77314700 | -0.98929700 |
| H | -2.09718200 | 0.41536300  | 0.05435700  |

|   |            |             |             |
|---|------------|-------------|-------------|
| C | 0.08115200 | 0.55194800  | 0.04856200  |
| H | 0.10809800 | 1.31453500  | -0.74028800 |
| H | 0.08546000 | 1.12545300  | 0.99248600  |
| C | 1.30479300 | -0.29378200 | -0.02818500 |
| H | 2.26467600 | 0.13528600  | -0.28969800 |
| H | 1.28710700 | -1.32624200 | 0.30277700  |

**TS3: H + CH<sub>3</sub>CH<sub>2</sub>CH<sub>3</sub> → H<sub>2</sub> + CH<sub>2</sub>CH<sub>2</sub>CH<sub>3</sub>**

|   |             |             |             |
|---|-------------|-------------|-------------|
| C | 1.21194300  | -0.04331500 | 0.24883100  |
| C | -0.10598900 | -0.58418200 | -0.25145200 |
| H | 2.09709900  | -0.61999000 | -0.01814500 |
| H | 1.44128900  | 1.12700200  | -0.41973600 |
| H | 1.22680600  | 0.28395200  | 1.28912200  |
| C | -1.30525200 | 0.29968800  | 0.10632700  |
| H | -0.05551100 | -0.72195500 | -1.33779700 |
| H | -0.25824200 | -1.59002800 | 0.16699400  |
| H | -2.23947000 | -0.13321600 | -0.26070400 |
| H | -1.39567400 | 0.41936200  | 1.19042800  |
| H | -1.20287500 | 1.29686100  | -0.33083800 |
| H | 1.58237000  | 1.90486300  | -0.90155500 |

**H-R4: H + CH<sub>3</sub>CH<sub>2</sub>CH<sub>3</sub> → H<sub>2</sub> + CH<sub>3</sub>CHCH<sub>3</sub>**

**CH<sub>3</sub>CHCH<sub>3</sub>**

|   |             |             |             |
|---|-------------|-------------|-------------|
| C | 1.29700200  | -0.19799900 | 0.00232700  |
| H | 1.31802000  | -1.02272500 | -0.72207300 |
| H | 1.47831500  | -0.65750500 | 0.98902500  |
| H | 2.14582700  | 0.45760400  | -0.20635700 |
| C | 0.00000000  | 0.53494500  | -0.03998500 |
| H | -0.00000100 | 1.61157700  | 0.09080500  |
| C | -1.29700200 | -0.19800000 | 0.00232600  |
| H | -1.47833300 | -0.65747300 | 0.98903700  |
| H | -2.14582300 | 0.45759600  | -0.20639300 |
| H | -1.31800600 | -1.02274900 | -0.72204700 |

**TS4: H + CH<sub>3</sub>CH<sub>2</sub>CH<sub>3</sub> → H<sub>2</sub> + CH<sub>3</sub>CHCH<sub>3</sub>**

|   |             |             |             |
|---|-------------|-------------|-------------|
| C | -1.28718800 | -0.31316100 | 0.09263800  |
| C | 0.00000000  | 0.36119500  | -0.32779900 |
| H | -2.16214600 | 0.28252600  | -0.18034200 |
| H | -1.39014900 | -1.29321500 | -0.39083800 |
| H | -1.31314500 | -0.47858500 | 1.17419700  |
| C | 1.28717300  | -0.31319000 | 0.09263200  |
| H | 0.00000100  | 0.67229900  | -1.37527400 |
| H | 0.00001700  | 1.52553700  | 0.27375900  |

|   |            |             |             |
|---|------------|-------------|-------------|
| H | 2.16214000 | 0.28252000  | −0.18027200 |
| H | 1.31309200 | −0.47869600 | 1.17418000  |
| H | 1.39015400 | −1.29320700 | −0.39091700 |
| H | 0.00012700 | 2.37175900  | 0.75067800  |

#### 2.1.4 C4 (*n*-C<sub>4</sub>H<sub>10</sub>)

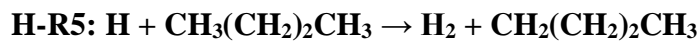

##### *n*-C<sub>4</sub>H<sub>10</sub>

|   |             |             |             |
|---|-------------|-------------|-------------|
| C | 1.96237900  | −0.12089900 | −0.00000100 |
| H | 2.11012200  | −0.75099000 | −0.88310500 |
| H | 2.11016900  | −0.75087600 | 0.88317400  |
| H | 2.74857400  | 0.63959500  | −0.00007400 |
| C | 0.56860800  | 0.51374700  | 0.00000200  |
| H | 0.46407900  | 1.16571000  | 0.87633500  |
| H | 0.46407600  | 1.16569900  | −0.87633700 |
| C | −0.56860800 | −0.51374700 | 0.00000200  |
| H | −0.46407800 | −1.16570200 | 0.87634000  |
| H | −0.46407700 | −1.16570700 | −0.87633100 |
| C | −1.96237900 | 0.12089900  | −0.00000200 |
| H | −2.11013900 | 0.75094600  | −0.88313300 |
| H | −2.74857400 | −0.63959500 | −0.00002000 |
| H | −2.11015200 | 0.75092000  | 0.88314600  |

##### CH<sub>2</sub>(CH<sub>2</sub>)<sub>2</sub>CH<sub>3</sub>

|   |             |             |             |
|---|-------------|-------------|-------------|
| C | 1.89065500  | −0.13298000 | 0.01796600  |
| H | 2.03652800  | −0.85347500 | −0.79313500 |
| H | 2.01950800  | −0.66948000 | 0.96344600  |
| H | 2.68875200  | 0.61101700  | −0.05288000 |
| C | 0.50958400  | 0.52183700  | −0.06432400 |
| H | 0.40401800  | 1.26027200  | 0.73940100  |
| H | 0.41882900  | 1.07740500  | −1.00425200 |
| C | −0.64479400 | −0.48800600 | 0.03253100  |
| H | −0.52452800 | −1.06291900 | 0.96912500  |
| H | −0.55129400 | −1.23471300 | −0.76737000 |
| C | −1.99885700 | 0.13018100  | −0.00809000 |
| H | −2.86978100 | −0.44772900 | −0.29282800 |
| H | −2.16155600 | 1.13342300  | 0.36999000  |

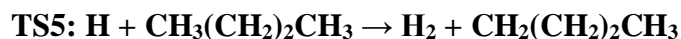

|   |            |             |             |
|---|------------|-------------|-------------|
| C | 2.02529000 | −0.04297600 | 0.09498100  |
| H | 2.25299100 | −0.99578400 | −0.39355900 |
| H | 2.13766000 | −0.18941200 | 1.17386400  |
| H | 2.78105700 | 0.68095700  | −0.22134400 |

|   |             |             |             |
|---|-------------|-------------|-------------|
| C | 0.61408900  | 0.43646200  | -0.25422700 |
| H | 0.42567700  | 1.40507400  | 0.22223900  |
| H | 0.54114300  | 0.60799300  | -1.33496800 |
| C | -0.48037700 | -0.55125600 | 0.17022000  |
| H | -0.41128500 | -0.73595800 | 1.24960700  |
| H | -0.29010400 | -1.52457400 | -0.30812500 |
| C | -1.87812100 | -0.09940400 | -0.17697800 |
| H | -2.02115700 | 0.26551400  | -1.19467500 |
| H | -2.68557100 | -0.75611600 | 0.14547700  |
| H | -2.13166700 | 1.02020800  | 0.56430800  |
| H | -2.28402800 | 1.76514200  | 1.09320000  |

**H-R6:  $\text{H} + \text{CH}_3(\text{CH}_2)_2\text{CH}_3 \rightarrow \text{H}_2 + \text{CH}_3\text{CHCH}_2\text{CH}_3$**   
 **$\text{CH}_3\text{CHCH}_2\text{CH}_3$**

|   |             |             |             |
|---|-------------|-------------|-------------|
| C | -1.93936300 | 0.16714600  | -0.06931200 |
| H | -2.01803200 | 0.69084600  | -1.02618900 |
| H | -2.10409100 | 0.90023900  | 0.72615300  |
| H | -2.74863300 | -0.56611000 | -0.01877700 |
| C | -0.56934200 | -0.50448200 | 0.07821400  |
| H | -0.55027300 | -1.07417100 | 1.02541000  |
| H | -0.44238400 | -1.26679000 | -0.70441400 |
| C | 0.58141500  | 0.44514500  | 0.03818600  |
| H | 0.40254800  | 1.48623900  | 0.29111800  |
| C | 1.98633600  | -0.04327700 | -0.05732100 |
| H | 2.09763400  | -0.80211300 | -0.84222100 |
| H | 2.68798200  | 0.76751100  | -0.26816700 |
| H | 2.32097500  | -0.52283700 | 0.87848600  |

**TS6:  $\text{H} + \text{CH}_3(\text{CH}_2)_2\text{CH}_3 \rightarrow \text{H}_2 + \text{CH}_3\text{CHCH}_2\text{CH}_3$**

|   |             |             |             |
|---|-------------|-------------|-------------|
| C | -1.97191900 | 0.07469100  | -0.08592600 |
| H | -2.11538800 | 0.19957500  | -1.16363300 |
| H | -2.09074700 | 1.05626400  | 0.38127700  |
| H | -2.77285600 | -0.57089600 | 0.28366000  |
| C | -0.59460500 | -0.51996700 | 0.22207500  |
| H | -0.48859700 | -0.67561600 | 1.30280700  |
| H | -0.51811600 | -1.52004800 | -0.23072400 |
| C | 0.56118400  | 0.32485500  | -0.27412000 |
| H | 0.47343200  | 1.45810600  | 0.38709800  |
| H | 0.42681600  | 0.67133900  | -1.30280100 |
| C | 1.95463700  | -0.19329200 | 0.00443500  |
| H | 2.13909400  | -1.12994400 | -0.53703300 |
| H | 2.71960900  | 0.52279300  | -0.30686100 |
| H | 2.09685300  | -0.39818900 | 1.06999300  |

|   |            |            |            |
|---|------------|------------|------------|
| H | 0.43411700 | 2.26889300 | 0.91743500 |
|---|------------|------------|------------|

### 2.1.5 C5 (*n*-C<sub>5</sub>H<sub>10</sub>)

**H-R7: H + CH<sub>3</sub>(CH<sub>2</sub>)<sub>3</sub>CH<sub>3</sub> → H<sub>2</sub> + CH<sub>2</sub>(CH<sub>2</sub>)<sub>3</sub>CH<sub>3</sub>**

***n*-C<sub>5</sub>H<sub>10</sub>**

|   |             |             |             |
|---|-------------|-------------|-------------|
| C | -2.56001500 | 0.32448200  | 0.00000100  |
| H | -2.60551700 | 0.97009100  | -0.88304800 |
| H | -2.60552500 | 0.97007400  | 0.88306100  |
| H | -3.45699100 | -0.30156300 | -0.00000900 |
| C | -1.28414300 | -0.52291400 | -0.00000200 |
| H | -1.28420500 | -1.18280500 | 0.87636800  |
| H | -1.28420500 | -1.18280000 | -0.87637500 |
| C | 0.00000000  | 0.31410100  | 0.00000000  |
| H | -0.00000100 | 0.97529100  | 0.87691100  |
| H | 0.00000100  | 0.97529000  | -0.87691200 |
| C | 1.28414300  | -0.52291400 | 0.00000200  |
| H | 1.28420500  | -1.18280500 | -0.87636800 |
| H | 1.28420500  | -1.18280000 | 0.87637500  |
| C | 2.56001500  | 0.32448200  | -0.00000100 |
| H | 2.60552100  | 0.97008600  | 0.88305200  |
| H | 3.45699100  | -0.30156300 | 0.00000200  |
| H | 2.60552200  | 0.97008000  | -0.88305700 |

**CH<sub>2</sub>(CH<sub>2</sub>)<sub>3</sub>CH<sub>3</sub>**

|   |             |             |             |
|---|-------------|-------------|-------------|
| C | -2.59979300 | -0.34001800 | -0.01596000 |
| H | -2.60752600 | -1.34842700 | 0.38253500  |
| H | -3.54738000 | 0.08889400  | -0.31886000 |
| C | -1.35925600 | 0.48321500  | 0.01906600  |
| H | -1.37319300 | 1.21235500  | -0.80195100 |
| H | -1.34407400 | 1.09610600  | 0.93885800  |
| C | -0.06110100 | -0.33667300 | -0.03699200 |
| H | -0.04951100 | -0.92680500 | -0.96128400 |
| H | -0.05963500 | -1.06036000 | 0.78810900  |
| C | 1.20699100  | 0.52024100  | 0.03782000  |
| H | 1.19066300  | 1.10902300  | 0.96323200  |
| H | 1.20067200  | 1.24638100  | -0.78423600 |
| C | 2.49663200  | -0.30357100 | -0.02047300 |
| H | 2.55905800  | -0.87499300 | -0.95196600 |
| H | 3.38211000  | 0.33557200  | 0.03660800  |
| H | 2.54797500  | -1.01691200 | 0.80819200  |

**TS7: H + CH<sub>3</sub>(CH<sub>2</sub>)<sub>3</sub>CH<sub>3</sub> → H<sub>2</sub> + CH<sub>2</sub>(CH<sub>2</sub>)<sub>3</sub>CH<sub>3</sub>**

|   |             |            |             |
|---|-------------|------------|-------------|
| C | -2.61040100 | 0.35419500 | -0.07328200 |
|---|-------------|------------|-------------|



|   |             |             |             |
|---|-------------|-------------|-------------|
| H | -2.67690600 | 0.66321700  | -1.12127900 |
| H | -2.60496200 | 1.26189300  | 0.53839900  |
| H | -3.52069400 | -0.20205000 | 0.16688200  |
| C | -1.35704200 | -0.48926600 | 0.17686200  |
| H | -1.33834600 | -0.81318600 | 1.22459300  |
| H | -1.40744300 | -1.40579100 | -0.42378000 |
| C | -0.05518000 | 0.25295100  | -0.14377400 |
| H | -0.00010100 | 1.16743100  | 0.45929100  |
| H | -0.07227700 | 0.57893500  | -1.19190400 |
| C | 1.20393600  | -0.58811200 | 0.10001800  |
| H | 1.14479100  | -1.50698400 | -0.50356200 |
| H | 1.22774800  | -0.92372800 | 1.14429900  |
| C | 2.49084700  | 0.12922200  | -0.22869800 |
| H | 2.61258800  | 1.16196400  | 0.65826900  |
| H | 3.40840800  | -0.42588900 | -0.03563500 |
| H | 2.51435200  | 0.64958000  | -1.18681900 |
| H | 2.67988600  | 1.84066400  | 1.28449100  |

**H-R8:  $\text{H} + \text{CH}_3(\text{CH}_2)_3\text{CH}_3 \rightarrow \text{H}_2 + \text{CH}_3\text{CH}(\text{CH}_2)_2\text{CH}_3$**   
 **$\text{CH}_3\text{CH}(\text{CH}_2)_2\text{CH}_3$**

|   |             |             |             |
|---|-------------|-------------|-------------|
| C | 2.53691600  | -0.29135500 | -0.00753100 |
| H | 2.56519400  | -1.05465800 | -0.79171100 |
| H | 2.62825000  | -0.80397800 | 0.95543200  |
| H | 3.41924000  | 0.34266300  | -0.13080600 |
| C | 1.24616000  | 0.52854700  | -0.07894100 |
| H | 1.26136100  | 1.30391700  | 0.69611800  |
| H | 1.19622200  | 1.05575000  | -1.03826700 |
| C | -0.02114900 | -0.32113200 | 0.09001800  |
| H | 0.04936400  | -0.87223700 | 1.04695900  |
| H | -0.04257100 | -1.10699000 | -0.68023500 |
| C | -1.29424100 | 0.45619300  | 0.04487800  |
| H | -1.26731700 | 1.50922900  | 0.31006000  |
| C | -2.61557100 | -0.22477500 | -0.06517300 |
| H | -2.89124900 | -0.74469000 | 0.86838100  |
| H | -3.42156200 | 0.47920700  | -0.28685700 |
| H | -2.60962400 | -0.99308300 | -0.84858600 |

**TS8:  $\text{H} + \text{CH}_3(\text{CH}_2)_3\text{CH}_3 \rightarrow \text{H}_2 + \text{CH}_3\text{CH}(\text{CH}_2)_2\text{CH}_3$**

|   |            |             |             |
|---|------------|-------------|-------------|
| C | 2.59894100 | -0.29149300 | 0.11327100  |
| H | 2.67495700 | -1.21964200 | -0.46207500 |
| H | 2.64545200 | -0.55550800 | 1.17447800  |
| H | 3.47972200 | 0.31435400  | -0.11610800 |
| C | 1.30536200 | 0.45963000  | -0.21374400 |

|   |             |             |             |
|---|-------------|-------------|-------------|
| H | 1.27185000  | 1.39685900  | 0.35282000  |
| H | 1.30388500  | 0.74221600  | -1.27335600 |
| C | 0.04295100  | -0.35628800 | 0.08915600  |
| H | 0.03963500  | -0.65180800 | 1.14675500  |
| H | 0.07611200  | -1.29794100 | -0.48130800 |
| C | -1.25191300 | 0.36089700  | -0.23293000 |
| H | -1.23937000 | 0.85007100  | -1.21095700 |
| H | -1.28545500 | 1.40242300  | 0.57020800  |
| C | -2.53446000 | -0.39377400 | 0.03994000  |
| H | -2.57354000 | -0.75033700 | 1.07384700  |
| H | -3.41413300 | 0.23089800  | -0.13566900 |
| H | -2.61686600 | -1.27198500 | -0.61300900 |
| H | -1.32752900 | 2.13656800  | 1.20021700  |

**H-R9:  $\text{H} + \text{CH}_3(\text{CH}_2)_3\text{CH}_3 \rightarrow \text{H}_2 + \text{CH}_3\text{CH}_2\text{CHCH}_2\text{CH}_3$**

**$\text{CH}_3\text{CH}_2\text{CHCH}_2\text{CH}_3$**

|   |             |             |             |
|---|-------------|-------------|-------------|
| C | -2.52091700 | -0.40333900 | 0.07692800  |
| H | -2.45671700 | -1.05025200 | 0.95637500  |
| H | -2.58977000 | -1.04678900 | -0.80538400 |
| H | -3.45055000 | 0.16783100  | 0.14577700  |
| C | -1.30323100 | 0.52378000  | -0.01368500 |
| H | -1.43520800 | 1.20304900  | -0.87568000 |
| H | -1.27716400 | 1.18973300  | 0.86096800  |
| C | 0.00000000  | -0.19406900 | -0.13277600 |
| H | 0.00000000  | -1.20801900 | -0.52637800 |
| C | 1.30323100  | 0.52378000  | -0.01368500 |
| H | 1.27716400  | 1.18973300  | 0.86096800  |
| H | 1.43520800  | 1.20304900  | -0.87568000 |
| C | 2.52091700  | -0.40333900 | 0.07692800  |
| H | 2.58977000  | -1.04678900 | -0.80538400 |
| H | 3.45055000  | 0.16783100  | 0.14577700  |
| H | 2.45671700  | -1.05025300 | 0.95637400  |

**TS9:  $\text{H} + \text{CH}_3(\text{CH}_2)_3\text{CH}_3 \rightarrow \text{H}_2 + \text{CH}_3\text{CH}_2\text{CHCH}_2\text{CH}_3$**

|   |             |             |             |
|---|-------------|-------------|-------------|
| C | -2.55045800 | 0.27487600  | -0.15823800 |
| H | -2.58114500 | 0.57956800  | -1.20888900 |
| H | -2.58434300 | 1.18143700  | 0.45231000  |
| H | -3.45634400 | -0.30121500 | 0.04779900  |
| C | -1.29222400 | -0.54553500 | 0.14140000  |
| H | -1.30305200 | -0.87460100 | 1.18777200  |
| H | -1.30481000 | -1.46667100 | -0.46015100 |
| C | 0.00000200  | 0.19554000  | -0.13562000 |
| H | 0.00000000  | 1.21281700  | 0.70505700  |

|   |             |             |             |
|---|-------------|-------------|-------------|
| H | 0.00000100  | 0.71304500  | -1.10033000 |
| C | 1.29223000  | -0.54553400 | 0.14139700  |
| H | 1.30482200  | -1.46666600 | -0.46015900 |
| H | 1.30305600  | -0.87460500 | 1.18776800  |
| C | 2.55046200  | 0.27488500  | -0.15823100 |
| H | 2.58433700  | 1.18144500  | 0.45231800  |
| H | 3.45635000  | -0.30120100 | 0.04781100  |
| H | 2.58115300  | 0.57957800  | -1.20888200 |
| H | -0.00009800 | 1.91168000  | 1.37333000  |

### 2.1.6 C6 (*n*-C<sub>6</sub>H<sub>14</sub>)

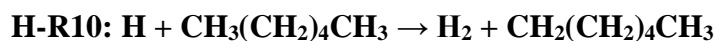

*n*-C<sub>6</sub>H<sub>14</sub>

|   |             |             |             |
|---|-------------|-------------|-------------|
| C | -3.22383000 | 0.20850600  | 0.00000200  |
| H | -3.31415500 | 0.84939500  | -0.88305700 |
| H | -3.31416000 | 0.84937700  | 0.88307500  |
| H | -4.07532000 | -0.47816400 | -0.00000700 |
| C | -1.89256500 | -0.54887400 | -0.00000200 |
| H | -1.84760800 | -1.20728600 | 0.87630600  |
| H | -1.84761100 | -1.20728000 | -0.87631500 |
| C | -0.66878800 | 0.37423000  | -0.00000100 |
| H | -0.71482800 | 1.03361900  | 0.87689900  |
| H | -0.71482600 | 1.03361800  | -0.87690100 |
| C | 0.66878800  | -0.37423000 | 0.00000100  |
| H | 0.71482700  | -1.03362100 | -0.87689800 |
| H | 0.71482700  | -1.03361600 | 0.87690200  |
| C | 1.89256500  | 0.54887400  | -0.00000200 |
| H | 1.84760900  | 1.20728600  | 0.87630700  |
| H | 1.84761000  | 1.20728000  | -0.87631400 |
| C | 3.22383000  | -0.20850600 | 0.00000200  |
| H | 3.31415800  | -0.84938900 | -0.88306200 |
| H | 4.07532000  | 0.47816400  | 0.00000000  |
| H | 3.31415700  | -0.84938300 | 0.88307000  |

**CH<sub>2</sub>(CH<sub>2</sub>)<sub>4</sub>CH<sub>3</sub>**

|   |             |             |             |
|---|-------------|-------------|-------------|
| C | -3.14961200 | -0.22281100 | 0.02044600  |
| H | -3.23126700 | -0.80292300 | 0.94515300  |
| H | -3.23738200 | -0.92269600 | -0.81666300 |
| H | -4.00688400 | 0.45478400  | -0.02265900 |
| C | -1.82564100 | 0.54488700  | -0.03645300 |
| H | -1.79005700 | 1.14385300  | -0.95458100 |
| H | -1.78234100 | 1.25990600  | 0.79412500  |
| C | -0.59376800 | -0.36581800 | 0.01853700  |

|   |             |             |             |
|---|-------------|-------------|-------------|
| H | -0.63752300 | -1.08125700 | -0.81315600 |
| H | -0.62970100 | -0.96637300 | 0.93706000  |
| C | 0.73453000  | 0.39547300  | -0.03771900 |
| H | 0.78221800  | 1.10694700  | 0.79640600  |
| H | 0.77431200  | 0.99578600  | -0.95448500 |
| C | 1.96804600  | -0.51925200 | 0.01555500  |
| H | 1.93361800  | -1.23740300 | -0.81447700 |
| H | 1.90192000  | -1.14042600 | 0.92746400  |
| C | 3.26593900  | 0.21100800  | -0.00187600 |
| H | 3.34421300  | 1.21199900  | 0.40754300  |
| H | 4.18190700  | -0.28312800 | -0.30266800 |

**TS10:  $\text{H} + \text{CH}_3(\text{CH}_2)_4\text{CH}_3 \rightarrow \text{H}_2 + \text{CH}_2(\text{CH}_2)_4\text{CH}_3$**

|   |             |             |             |
|---|-------------|-------------|-------------|
| C | 3.28971900  | -0.15656400 | 0.10098400  |
| H | 3.41527800  | -1.02502000 | -0.55344600 |
| H | 3.36481200  | -0.50882300 | 1.13467900  |
| H | 4.12949800  | 0.51991200  | -0.08059100 |
| C | 1.94752700  | 0.53659200  | -0.15117900 |
| H | 1.86563900  | 1.41987700  | 0.49371800  |
| H | 1.91737700  | 0.90977600  | -1.18217000 |
| C | 0.73997800  | -0.37645200 | 0.08973400  |
| H | 0.77114900  | -0.74997000 | 1.12165800  |
| H | 0.82204000  | -1.26107000 | -0.55552300 |
| C | -0.60757000 | 0.30908500  | -0.15914100 |
| H | -0.64093600 | 0.68211200  | -1.19092500 |
| H | -0.69330200 | 1.19077700  | 0.48731600  |
| C | -1.81265300 | -0.60927500 | 0.08086800  |
| H | -1.78634600 | -0.99244700 | 1.10854200  |
| H | -1.72362500 | -1.49531800 | -0.56642900 |
| C | -3.14494900 | 0.05188400  | -0.17708300 |
| H | -3.22669700 | 0.60956200  | -1.11070400 |
| H | -4.02587800 | -0.55848100 | 0.01983800  |
| H | -3.29017600 | 1.03930500  | 0.75661700  |
| H | -3.37113800 | 1.68818700  | 1.41232200  |

**H-R11:  $\text{H} + \text{CH}_3(\text{CH}_2)_4\text{CH}_3 \rightarrow \text{H}_2 + \text{CH}_3\text{CH}(\text{CH}_2)_3\text{CH}_3$**   
 **$\text{CH}_3\text{CH}(\text{CH}_2)_3\text{CH}_3$**

|   |            |             |             |
|---|------------|-------------|-------------|
| C | 3.18193500 | 0.23363400  | 0.06760700  |
| H | 3.24206300 | 0.79021600  | 1.00824800  |
| H | 3.28691900 | 0.95472200  | -0.74930300 |
| H | 4.04119600 | -0.44158300 | 0.02630600  |
| C | 1.86096800 | -0.53390200 | -0.03774000 |
| H | 1.84618400 | -1.10928400 | -0.97158300 |

|   |             |             |             |
|---|-------------|-------------|-------------|
| H | 1.80152400  | -1.27014700 | 0.77320700  |
| C | 0.62763900  | 0.37391800  | 0.01488000  |
| H | 0.68328100  | 1.10800600  | -0.79909100 |
| H | 0.63904000  | 0.95072800  | 0.94775500  |
| C | -0.70038300 | -0.38854300 | -0.08706300 |
| H | -0.76157900 | -1.13187300 | 0.72224100  |
| H | -0.69271600 | -0.98965500 | -1.01586500 |
| C | -1.91302600 | 0.48101900  | -0.05682500 |
| H | -1.81475500 | 1.51825500  | -0.36385500 |
| C | -3.27781200 | -0.09721400 | 0.10061000  |
| H | -3.31269300 | -0.83396100 | 0.91304800  |
| H | -4.02660900 | 0.67145800  | 0.30762100  |
| H | -3.60777900 | -0.63035600 | -0.80754700 |

**TS11: H + CH<sub>3</sub>(CH<sub>2</sub>)<sub>4</sub>CH<sub>3</sub> → H<sub>2</sub> + CH<sub>3</sub>CH(CH<sub>2</sub>)<sub>3</sub>CH<sub>3</sub>**

|   |             |             |             |
|---|-------------|-------------|-------------|
| C | -3.25529300 | 0.21502000  | -0.07079200 |
| H | -3.34782500 | 0.51963700  | -1.11811100 |
| H | -3.31982100 | 1.11909900  | 0.54273000  |
| H | -4.11841600 | -0.41183400 | 0.16976600  |
| C | -1.93872900 | -0.52745300 | 0.17543400  |
| H | -1.89189100 | -0.84934400 | 1.22288500  |
| H | -1.91914200 | -1.44503600 | -0.42548300 |
| C | -0.70019200 | 0.31529100  | -0.14810800 |
| H | -0.71666300 | 1.23091200  | 0.45539300  |
| H | -0.74665700 | 0.63921200  | -1.19589800 |
| C | 0.62175800  | -0.42303700 | 0.09218200  |
| H | 0.64066500  | -1.33944200 | -0.51846600 |
| H | 0.67193500  | -0.76192200 | 1.13532500  |
| C | 1.85525100  | 0.39725700  | -0.22516300 |
| H | 1.83359600  | 1.40388200  | 0.62050500  |
| H | 1.78548500  | 0.92450300  | -1.18068300 |
| C | 3.19422800  | -0.27339500 | -0.01009100 |
| H | 3.32472200  | -1.11562900 | -0.70142800 |
| H | 4.02269900  | 0.42020800  | -0.17589400 |
| H | 3.28195800  | -0.66836900 | 1.00672100  |
| H | 1.83722800  | 2.11202100  | 1.28186100  |

**H-R12: H + CH<sub>3</sub>(CH<sub>2</sub>)<sub>4</sub>CH<sub>3</sub> → H<sub>2</sub> + CH<sub>3</sub>CH<sub>2</sub>CH(CH<sub>2</sub>)<sub>2</sub>CH<sub>3</sub>**  
**CH<sub>3</sub>CH<sub>2</sub>CH(CH<sub>2</sub>)<sub>2</sub>CH<sub>3</sub>**

|   |             |             |             |
|---|-------------|-------------|-------------|
| C | -3.20624500 | -0.13133400 | 0.08127500  |
| H | -3.27656500 | -0.80241400 | 0.94330900  |
| H | -3.37895500 | -0.73073300 | -0.81837900 |
| H | -4.02150700 | 0.59332300  | 0.15855800  |

|   |             |             |             |
|---|-------------|-------------|-------------|
| C | -1.84376200 | 0.56467300  | 0.03074700  |
| H | -1.81482000 | 1.25250900  | -0.82260100 |
| H | -1.71159400 | 1.18232900  | 0.92616600  |
| C | -0.66683800 | -0.41523900 | -0.07813400 |
| H | -0.82294500 | -1.05498400 | -0.96719900 |
| H | -0.69017600 | -1.11312700 | 0.77234800  |
| C | 0.67244600  | 0.23905700  | -0.15365500 |
| H | 0.73144100  | 1.25751700  | -0.53091800 |
| C | 1.93619200  | -0.54305600 | -0.01453300 |
| H | 2.05651100  | -1.21584800 | -0.88330300 |
| H | 1.85622000  | -1.21917000 | 0.84897700  |
| C | 3.19499600  | 0.32162900  | 0.11988100  |
| H | 3.13985200  | 0.95932800  | 1.00667600  |
| H | 4.09347200  | -0.29558800 | 0.20391800  |
| H | 3.31833100  | 0.97248000  | -0.75104200 |

**TS12:  $\text{H} + \text{CH}_3(\text{CH}_2)_4\text{CH}_3 \rightarrow \text{H}_2 + \text{CH}_3\text{CH}_2\text{CH}(\text{CH}_2)_2\text{CH}_3$**

|   |             |             |             |
|---|-------------|-------------|-------------|
| C | -3.23952300 | -0.19863200 | 0.04134900  |
| H | -3.33620300 | -0.52417800 | 1.08189500  |
| H | -3.34756000 | -1.08390500 | -0.59345300 |
| H | -4.07713200 | 0.46978800  | -0.17567700 |
| C | -1.89587700 | 0.49531700  | -0.19850200 |
| H | -1.84227600 | 0.84052600  | -1.23802100 |
| H | -1.82996000 | 1.39333000  | 0.42582200  |
| C | -0.69172400 | -0.40885300 | 0.09244500  |
| H | -0.75928200 | -1.31162100 | -0.53479700 |
| H | -0.74161900 | -0.76498700 | 1.12985900  |
| C | 0.65047800  | 0.25108500  | -0.14708800 |
| H | 0.70400700  | 1.24631100  | 0.71711600  |
| H | 0.70223600  | 0.78905600  | -1.09903500 |
| C | 1.88696800  | -0.57870300 | 0.13292200  |
| H | 1.85220500  | -1.48392900 | -0.49155700 |
| H | 1.85732300  | -0.93312300 | 1.17058100  |
| C | 3.20043300  | 0.16621000  | -0.12444100 |
| H | 3.28078300  | 1.05309700  | 0.51013100  |
| H | 4.06377600  | -0.47203100 | 0.08118500  |
| H | 3.26936900  | 0.49452200  | -1.16613300 |
| H | 0.73980700  | 1.92860100  | 1.40197300  |

**2.1.7 C7 (*n*-C<sub>7</sub>H<sub>16</sub>)**

**H-R13:  $\text{H} + \text{CH}_3(\text{CH}_2)_5\text{CH}_3 \rightarrow \text{H}_2 + \text{CH}_2(\text{CH}_2)_5\text{CH}_3$**

***n*-C<sub>7</sub>H<sub>16</sub>**

|   |            |             |            |
|---|------------|-------------|------------|
| C | 3.84318100 | -0.35384700 | 0.00000200 |
|---|------------|-------------|------------|

|   |             |             |             |
|---|-------------|-------------|-------------|
| H | 3.88847700  | -0.99952200 | -0.88303400 |
| H | 3.88848000  | -0.99950900 | 0.88304900  |
| H | 4.74048100  | 0.27178600  | -0.00000500 |
| C | 2.56763600  | 0.49398400  | -0.00000300 |
| H | 2.56795800  | 1.15388300  | 0.87632600  |
| H | 2.56796000  | 1.15387500  | -0.87633800 |
| C | 1.28319900  | -0.34286400 | 0.00000000  |
| H | 1.28397200  | -1.00382500 | -0.87686000 |
| H | 1.28397400  | -1.00382500 | 0.87686000  |
| C | 0.00000000  | 0.49570300  | 0.00000100  |
| H | 0.00000100  | 1.15639600  | -0.87691900 |
| H | -0.00000100 | 1.15639200  | 0.87692300  |
| C | -1.28319900 | -0.34286400 | -0.00000200 |
| H | -1.28397300 | -1.00382800 | 0.87685500  |
| H | -1.28397400 | -1.00382100 | -0.87686500 |
| C | -2.56763600 | 0.49398400  | 0.00000200  |
| H | -2.56796000 | 1.15388200  | -0.87632800 |
| H | -2.56795800 | 1.15387600  | 0.87633600  |
| C | -3.84318100 | -0.35384700 | 0.00000000  |
| H | -3.88847800 | -0.99951800 | 0.88304000  |
| H | -4.74048100 | 0.27178600  | 0.00000300  |
| H | -3.88847900 | -0.99951300 | -0.88304400 |

**CH<sub>2</sub>(CH<sub>2</sub>)<sub>5</sub>CH<sub>3</sub>**

|   |             |             |             |
|---|-------------|-------------|-------------|
| C | 3.77410400  | -0.33403400 | 0.01418700  |
| H | 3.82298600  | -1.02750600 | -0.83138000 |
| H | 3.82906800  | -0.92860000 | 0.93165800  |
| H | 4.66475700  | 0.29937800  | -0.02440800 |
| C | 2.49053000  | 0.50034200  | -0.02817500 |
| H | 2.48641000  | 1.20656600  | 0.81103500  |
| H | 2.48199500  | 1.11148400  | -0.93899900 |
| C | 1.21446000  | -0.34786300 | 0.02115200  |
| H | 1.21908900  | -1.05479500 | -0.81881300 |
| H | 1.22366200  | -0.96019800 | 0.93232700  |
| C | -0.07589800 | 0.47822400  | -0.02021600 |
| H | -0.08509400 | 1.08957900  | -0.93207600 |
| H | -0.07876300 | 1.18562500  | 0.81926900  |
| C | -1.34961400 | -0.37194600 | 0.03167100  |
| H | -1.34591200 | -0.98235500 | 0.94257300  |
| H | -1.35191600 | -1.07689000 | -0.80929500 |
| C | -2.64179200 | 0.45850300  | -0.00962200 |
| H | -2.62116800 | 1.08962900  | -0.91683500 |
| H | -2.65147700 | 1.17129500  | 0.82574500  |

|   |             |             |             |
|---|-------------|-------------|-------------|
| C | -3.88820200 | -0.35638700 | 0.00780400  |
| H | -4.83388200 | 0.07452800  | 0.31386000  |
| H | -3.90128300 | -1.35877000 | -0.40546100 |

**TS13:  $\text{H} + \text{CH}_3(\text{CH}_2)_5\text{CH}_3 \rightarrow \text{H}_2 + \text{CH}_2(\text{CH}_2)_5\text{CH}_3$**

|   |             |             |             |
|---|-------------|-------------|-------------|
| C | -3.90244100 | 0.37978800  | -0.05125700 |
| H | -3.95998900 | 0.77669200  | -1.06982600 |
| H | -3.92246200 | 1.23173300  | 0.63585900  |
| H | -4.80597400 | -0.21020800 | 0.12615300  |
| C | -2.63734400 | -0.46063100 | 0.14464500  |
| H | -2.62474200 | -0.86939700 | 1.16241100  |
| H | -2.66632500 | -1.32577700 | -0.52919100 |
| C | -1.34352000 | 0.32449200  | -0.09867900 |
| H | -1.35736800 | 0.73564900  | -1.11661100 |
| H | -1.31440800 | 1.18954300  | 0.57673000  |
| C | -0.07215900 | -0.50971600 | 0.09266100  |
| H | -0.10006500 | -1.37215900 | -0.58629100 |
| H | -0.06147300 | -0.92414600 | 1.10908900  |
| C | 1.22009300  | 0.27904600  | -0.14356100 |
| H | 1.25466500  | 1.13545800  | 0.54068700  |
| H | 1.21058300  | 0.69862400  | -1.15775900 |
| C | 2.49059200  | -0.56073600 | 0.03897300  |
| H | 2.45970400  | -1.41559700 | -0.65407100 |
| H | 2.50294800  | -0.99855900 | 1.04488800  |
| C | 3.76842000  | 0.20931200  | -0.19126300 |
| H | 3.85540100  | 1.14404700  | 0.80121300  |
| H | 4.69363200  | -0.34651500 | -0.04170600 |
| H | 3.79629000  | 0.82830300  | -1.08868300 |
| H | 3.89773400  | 1.75298000  | 1.49798900  |

**H-R14:  $\text{H} + \text{CH}_3(\text{CH}_2)_5\text{CH}_3 \rightarrow \text{H}_2 + \text{CH}_3\text{CH}(\text{CH}_2)_4\text{CH}_3$**

**$\text{CH}_3\text{CH}(\text{CH}_2)_4\text{CH}_3$**

|   |             |             |             |
|---|-------------|-------------|-------------|
| C | 3.80229900  | -0.33135100 | -0.00965000 |
| H | 3.83648800  | -1.05700100 | -0.82852700 |
| H | 3.87180100  | -0.89015100 | 0.92909100  |
| H | 4.69291600  | 0.29851800  | -0.08734800 |
| C | 2.51918100  | 0.50310700  | -0.06326800 |
| H | 2.52981700  | 1.24131200  | 0.74788400  |
| H | 2.49646700  | 1.07846000  | -0.99681400 |
| C | 1.24305400  | -0.34001700 | 0.03956100  |
| H | 1.23458400  | -1.07989500 | -0.77162800 |
| H | 1.26553000  | -0.91563700 | 0.97432600  |
| C | -0.04577500 | 0.48644900  | -0.01614400 |



|   |             |             |             |
|---|-------------|-------------|-------------|
| H | -0.07176600 | 1.06037800  | -0.95034200 |
| H | -0.03953700 | 1.22414500  | 0.79618900  |
| C | -1.32218800 | -0.35988500 | 0.08672600  |
| H | -1.27798100 | -0.95514500 | 1.01820400  |
| H | -1.33368000 | -1.10919300 | -0.71927400 |
| C | -2.58808900 | 0.42984000  | 0.05012000  |
| H | -2.55610200 | 1.47448300  | 0.34588300  |
| C | -3.91330200 | -0.23629100 | -0.09765400 |
| H | -4.20862300 | -0.77617100 | 0.81842200  |
| H | -4.70957100 | 0.48012900  | -0.31480700 |
| H | -3.90142400 | -0.98534900 | -0.89940500 |

**TS14:  $\text{H} + \text{CH}_3(\text{CH}_2)_5\text{CH}_3 \rightarrow \text{H}_2 + \text{CH}_3\text{CH}(\text{CH}_2)_4\text{CH}_3$**

|   |             |             |             |
|---|-------------|-------------|-------------|
| C | 3.89225900  | -0.31319300 | 0.10617400  |
| H | 3.96194700  | -1.17608900 | -0.56386300 |
| H | 3.93537400  | -0.68901400 | 1.13338300  |
| H | 4.77853100  | 0.30612200  | -0.05763200 |
| C | 2.60388600  | 0.47703200  | -0.14037000 |
| H | 2.58198900  | 1.35393500  | 0.51808500  |
| H | 2.60568300  | 0.86755500  | -1.16537000 |
| C | 1.33296500  | -0.35071900 | 0.08117900  |
| H | 1.35542800  | -1.22914900 | -0.57739400 |
| H | 1.33179200  | -0.74124600 | 1.10721100  |
| C | 0.03933200  | 0.43353700  | -0.16267800 |
| H | 0.04072700  | 0.82599900  | -1.18767200 |
| H | 0.01406500  | 1.30779200  | 0.49898300  |
| C | -1.22974600 | -0.39888400 | 0.05470000  |
| H | -1.23461800 | -0.80689700 | 1.07397800  |
| H | -1.20851100 | -1.27347800 | -0.61442400 |
| C | -2.51764600 | 0.36249400  | -0.18342000 |
| H | -2.50188300 | 0.95459100  | -1.10273300 |
| H | -2.53747800 | 1.31013900  | 0.72672400  |
| C | -3.80801400 | -0.40286100 | 0.01102400  |
| H | -3.84887100 | -0.86814100 | 1.00068400  |
| H | -4.68085200 | 0.24691900  | -0.09317800 |
| H | -3.90240300 | -1.20482900 | -0.73221400 |
| H | -2.56913200 | 1.97135500  | 1.43578200  |

**H-R15:  $\text{H} + \text{CH}_3(\text{CH}_2)_5\text{CH}_3 \rightarrow \text{H}_2 + \text{CH}_3\text{CH}_2\text{CH}(\text{CH}_2)_3\text{CH}_3$**

|   |             |             |             |
|---|-------------|-------------|-------------|
| C | -3.79129600 | -0.42744300 | 0.07478200  |
| H | -3.77572700 | -1.08830800 | 0.94726800  |
| H | -3.85272300 | -1.05977300 | -0.81662900 |

|   |             |             |             |
|---|-------------|-------------|-------------|
| H | -4.70853800 | 0.16596100  | 0.12447100  |
| C | -2.54774400 | 0.46544500  | 0.03474100  |
| H | -2.60847700 | 1.13769400  | -0.82998300 |
| H | -2.53379400 | 1.11173700  | 0.92095500  |
| C | -1.23736100 | -0.32595900 | -0.03273100 |
| H | -1.17228600 | -0.99739600 | 0.83212600  |
| H | -1.24964300 | -0.97140400 | -0.92027400 |
| C | 0.01491900  | 0.56073400  | -0.07485500 |
| H | 0.03298300  | 1.21464800  | 0.80995300  |
| H | -0.07273900 | 1.25489500  | -0.93170500 |
| C | 1.29882200  | -0.19494400 | -0.16528600 |
| H | 1.28344700  | -1.19571300 | -0.59079000 |
| C | 2.61809600  | 0.47547900  | 0.02987700  |
| H | 2.58190700  | 1.10125100  | 0.93354100  |
| H | 2.79984200  | 1.18948000  | -0.79414200 |
| C | 3.80370900  | -0.49248500 | 0.11702300  |
| H | 3.88308100  | -1.09713600 | -0.79147800 |
| H | 4.74718600  | 0.04541900  | 0.24237500  |
| H | 3.69060700  | -1.17631500 | 0.96300100  |

**TS15:  $\text{H} + \text{CH}_3(\text{CH}_2)_5\text{CH}_3 \rightarrow \text{H}_2 + \text{CH}_3\text{CH}_2\text{CH}(\text{CH}_2)_3\text{CH}_3$**

|   |             |             |             |
|---|-------------|-------------|-------------|
| C | 3.85604300  | 0.35178800  | -0.10358500 |
| H | 3.88979200  | 1.19527700  | 0.59318900  |
| H | 3.89676600  | 0.76052000  | -1.11826200 |
| H | 4.76091200  | -0.24244600 | 0.05105100  |
| C | 2.59283200  | -0.48835100 | 0.10459500  |
| H | 2.60828800  | -1.34603600 | -0.57930400 |
| H | 2.59677500  | -0.90806800 | 1.11787900  |
| C | 1.29792900  | 0.30347100  | -0.10725900 |
| H | 1.28007800  | 1.15969300  | 0.57801700  |
| H | 1.29285900  | 0.72382400  | -1.12125100 |
| C | 0.02956800  | -0.53327000 | 0.09738600  |
| H | 0.03164700  | -0.96524400 | 1.10665100  |
| H | 0.04750500  | -1.39128100 | -0.59274900 |
| C | -1.25891600 | 0.23437400  | -0.11553900 |
| H | -1.24994500 | 0.84748000  | -1.02229700 |
| H | -1.26868900 | 1.15924500  | 0.82308000  |
| C | -2.55425800 | -0.52920200 | 0.07152500  |
| H | -2.57424600 | -0.96612100 | 1.07743800  |
| H | -2.56275000 | -1.38237000 | -0.62324200 |
| C | -3.80934800 | 0.31989100  | -0.15114000 |
| H | -3.82952800 | 0.73558700  | -1.16329700 |
| H | -4.71724200 | -0.27410700 | -0.01732900 |

|   |             |            |            |
|---|-------------|------------|------------|
| H | -3.85001600 | 1.15602000 | 0.55254300 |
| H | -1.27531100 | 1.78581800 | 1.56199100 |

**H-R16:  $\text{H} + \text{CH}_3(\text{CH}_2)_5\text{CH}_3 \rightarrow \text{H}_2 + \text{CH}_3(\text{CH}_2)_2\text{CH}(\text{CH}_2)_2\text{CH}_3$**   
 **$\text{CH}_3(\text{CH}_2)_2\text{CH}(\text{CH}_2)_2\text{CH}_3$**

|   |             |             |             |
|---|-------------|-------------|-------------|
| C | 3.84900100  | -0.24160100 | 0.11851900  |
| H | 4.01364700  | -0.80718800 | -0.80422900 |
| H | 3.86327500  | -0.95434800 | 0.94929900  |
| H | 4.69775200  | 0.43546300  | 0.24848500  |
| C | 2.52513600  | 0.52553000  | 0.07016900  |
| H | 2.40303200  | 1.10869200  | 0.98980800  |
| H | 2.55165600  | 1.25114000  | -0.75134500 |
| C | 1.30328000  | -0.38669000 | -0.10895800 |
| H | 1.44770600  | -0.99187900 | -1.02384100 |
| H | 1.27235900  | -1.12359400 | 0.70774200  |
| C | 0.00000000  | 0.33709400  | -0.18003600 |
| H | 0.00000000  | 1.37399300  | -0.50838100 |
| C | -1.30328000 | -0.38669000 | -0.10895800 |
| H | -1.27235900 | -1.12359400 | 0.70774200  |
| H | -1.44770600 | -0.99187900 | -1.02384000 |
| C | -2.52513600 | 0.52553000  | 0.07016900  |
| H | -2.55165600 | 1.25114000  | -0.75134500 |
| H | -2.40303200 | 1.10869200  | 0.98980700  |
| C | -3.84900100 | -0.24160100 | 0.11851900  |
| H | -3.86327500 | -0.95434700 | 0.94929900  |
| H | -4.69775200 | 0.43546300  | 0.24848500  |
| H | -4.01364700 | -0.80718900 | -0.80422900 |

**TS16:  $\text{H} + \text{CH}_3(\text{CH}_2)_5\text{CH}_3 \rightarrow \text{H}_2 + \text{CH}_3(\text{CH}_2)_2\text{CH}(\text{CH}_2)_2\text{CH}_3$**

|   |             |             |             |
|---|-------------|-------------|-------------|
| C | -3.84859500 | -0.34555000 | 0.05412300  |
| H | -3.91006900 | -0.71903900 | 1.08113000  |
| H | -3.90643400 | -1.20957200 | -0.61565900 |
| H | -4.73146900 | 0.27364200  | -0.12642500 |
| C | -2.55741800 | 0.44595400  | -0.17037900 |
| H | -2.53937600 | 0.83418400  | -1.19582800 |
| H | -2.54463900 | 1.32161400  | 0.48824400  |
| C | -1.29179200 | -0.38479900 | 0.07351500  |
| H | -1.30519200 | -0.78375100 | 1.09631000  |
| H | -1.30548800 | -1.26496700 | -0.58834500 |
| C | -0.00000300 | 0.37375000  | -0.15218800 |
| H | 0.00000200  | 1.32942700  | 0.75483300  |
| H | 0.00001700  | 0.95592600  | -1.07905300 |
| C | 1.29178600  | -0.38478700 | 0.07355100  |

|   |            |             |             |
|---|------------|-------------|-------------|
| H | 1.30545100 | -1.26501600 | -0.58822900 |
| H | 1.30521000 | -0.78365200 | 1.09637900  |
| C | 2.55741300 | 0.44593200  | -0.17045400 |
| H | 2.54463800 | 1.32167900  | 0.48805200  |
| H | 2.53937200 | 0.83402200  | -1.19595600 |
| C | 3.84858600 | -0.34555000 | 0.05414800  |
| H | 3.90638900 | -1.20969500 | -0.61547900 |
| H | 4.73146400 | 0.27359500  | -0.12653900 |
| H | 3.91008800 | -0.71885600 | 1.08122100  |
| H | 0.00017300 | 1.98076300  | 1.47144800  |

### 2.1.8 C8 (*n*-C<sub>8</sub>H<sub>18</sub>)

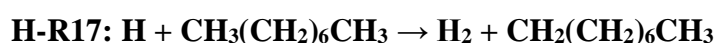

#### *n*-C<sub>8</sub>H<sub>18</sub>

|   |             |             |             |
|---|-------------|-------------|-------------|
| C | 4.49836200  | -0.25644100 | 0.00002700  |
| H | 4.56897900  | -0.89994900 | -0.88294200 |
| H | 4.56905800  | -0.89971100 | 0.88316000  |
| H | 5.37045300  | 0.40389200  | -0.00010100 |
| C | 3.19068200  | 0.54093500  | -0.00003200 |
| H | 3.16551000  | 1.20041200  | 0.87625200  |
| H | 3.16553100  | 1.20032700  | -0.87637900 |
| C | 1.93965200  | -0.34501000 | -0.00000600 |
| H | 1.96588900  | -1.00546800 | 0.87685600  |
| H | 1.96586200  | -1.00546400 | -0.87687100 |
| C | 0.62513200  | 0.44356800  | 0.00001300  |
| H | 0.59991500  | 1.10385100  | -0.87682400 |
| H | 0.59991000  | 1.10380400  | 0.87688500  |
| C | -0.62513200 | -0.44356800 | -0.00001400 |
| H | -0.59991300 | -1.10385400 | 0.87682100  |
| H | -0.59991200 | -1.10380100 | -0.87688900 |
| C | -1.93965200 | 0.34501000  | 0.00000900  |
| H | -1.96587700 | 1.00548500  | -0.87684000 |
| H | -1.96587400 | 1.00544600  | 0.87688700  |
| C | -3.19068200 | -0.54093500 | -0.00000800 |
| H | -3.16552000 | -1.20038800 | 0.87629300  |
| H | -3.16552100 | -1.20035100 | -0.87633800 |
| C | -4.49836200 | 0.25644100  | 0.00000900  |
| H | -4.56901800 | 0.89985000  | -0.88302700 |
| H | -5.37045300 | -0.40389200 | -0.00000700 |
| H | -4.56902000 | 0.89981000  | 0.88307500  |

#### **CH<sub>2</sub>(CH<sub>2</sub>)<sub>6</sub>CH<sub>3</sub>**

|   |             |             |            |
|---|-------------|-------------|------------|
| C | -4.42266500 | -0.27035800 | 0.01656000 |
|---|-------------|-------------|------------|

|   |             |             |             |
|---|-------------|-------------|-------------|
| H | -4.48942600 | -0.86955900 | 0.93024600  |
| H | -4.49047900 | -0.95685000 | -0.83340900 |
| H | -5.29804900 | 0.38437900  | -0.01531900 |
| C | -3.11965100 | 0.53343300  | -0.02403100 |
| H | -3.09914200 | 1.15010900  | -0.93091900 |
| H | -3.09657200 | 1.23401100  | 0.81960100  |
| C | -1.86376500 | -0.34476600 | 0.01603300  |
| H | -1.88744400 | -1.04592000 | -0.82849500 |
| H | -1.88482600 | -0.96281700 | 0.92325300  |
| C | -0.55443100 | 0.45112700  | -0.02401700 |
| H | -0.53134200 | 1.15175200  | 0.82074000  |
| H | -0.53488900 | 1.06921600  | -0.93097700 |
| C | 0.70083000  | -0.42785200 | 0.01484000  |
| H | 0.67663800  | -1.12954300 | -0.82905300 |
| H | 0.68289400  | -1.04475100 | 0.92279400  |
| C | 2.00834100  | 0.36979200  | -0.02905800 |
| H | 2.03759700  | 1.06858100  | 0.81653700  |
| H | 2.03149900  | 0.98582000  | -0.93588800 |
| C | 3.26559800  | -0.51276400 | 0.00906000  |
| H | 3.24840000  | -1.21956900 | -0.83122300 |
| H | 3.21748900  | -1.14867100 | 0.91188700  |
| C | 4.54391700  | 0.25134200  | 0.00001200  |
| H | 4.59650200  | 1.24886400  | 0.42181400  |
| H | 5.47210400  | -0.21478300 | -0.30798500 |

**TS17:  $\text{H} + \text{CH}_3(\text{CH}_2)_6\text{CH}_3 \rightarrow \text{H}_2 + \text{CH}_2(\text{CH}_2)_6\text{CH}_3$**

|   |             |             |             |
|---|-------------|-------------|-------------|
| C | -4.56650000 | -0.21479800 | 0.09836000  |
| H | -4.62773600 | -0.63895400 | 1.10565800  |
| H | -4.65978700 | -1.04135800 | -0.61335700 |
| H | -5.43155800 | 0.44004000  | -0.03876600 |
| C | -3.25160700 | 0.54388600  | -0.10353100 |
| H | -3.23635900 | 0.98747500  | -1.10661500 |
| H | -3.20317300 | 1.38393000  | 0.60011100  |
| C | -2.00953800 | -0.33629200 | 0.07673100  |
| H | -2.05768500 | -1.17599900 | -0.62910500 |
| H | -2.02679500 | -0.78266100 | 1.07967700  |
| C | -0.68833000 | 0.41524900  | -0.11958900 |
| H | -0.63963700 | 1.25224400  | 0.58893800  |
| H | -0.67323400 | 0.86467700  | -1.12105100 |
| C | 0.55267700  | -0.46726900 | 0.05614200  |
| H | 0.50678400  | -1.30158500 | -0.65604200 |
| H | 0.53523100  | -0.92043800 | 1.05578100  |
| C | 1.87276300  | 0.28754800  | -0.13227700 |

|   |            |             |             |
|---|------------|-------------|-------------|
| H | 1.92481100 | 1.11618900  | 0.58422500  |
| H | 1.89173600 | 0.74470700  | -1.12997800 |
| C | 3.11294100 | -0.59951300 | 0.03563200  |
| H | 3.06205500 | -1.42905400 | -0.68635300 |
| H | 3.09882100 | -1.07088900 | 1.02622400  |
| C | 4.41789000 | 0.13504000  | -0.15480300 |
| H | 4.52081100 | 1.03846400  | 0.86490600  |
| H | 5.32262800 | -0.45451400 | -0.00915200 |
| H | 4.47829300 | 0.77790500  | -1.03364900 |
| H | 4.57301900 | 1.62672000  | 1.57855700  |

**H-R18:  $\text{H} + \text{CH}_3(\text{CH}_2)_6\text{CH}_3 \rightarrow \text{H}_2 + \text{CH}_3\text{CH}(\text{CH}_2)_5\text{CH}_3$**   
 **$\text{CH}_3\text{CH}(\text{CH}_2)_5\text{CH}_3$**

|   |             |             |             |
|---|-------------|-------------|-------------|
| C | -4.44766400 | 0.27242000  | 0.05873600  |
| H | -4.52858600 | 0.97652000  | -0.77555800 |
| H | -4.50173600 | 0.85229500  | 0.98564100  |
| H | -5.32281400 | -0.38261400 | 0.02587100  |
| C | -3.14461300 | -0.52868100 | -0.01743000 |
| H | -3.10903800 | -1.24689900 | 0.81081000  |
| H | -3.13633300 | -1.12601600 | -0.93739300 |
| C | -1.88897400 | 0.34984400  | 0.02383200  |
| H | -1.89818900 | 0.94877800  | 0.94391800  |
| H | -1.92454400 | 1.06841500  | -0.80550300 |
| C | -0.57990000 | -0.44384400 | -0.05018800 |
| H | -0.57106700 | -1.04158300 | -0.97104500 |
| H | -0.54686900 | -1.16328100 | 0.77840400  |
| C | 0.67442800  | 0.43512000  | -0.00561400 |
| H | 0.67055700  | 1.03129500  | 0.91487800  |
| H | 0.64492100  | 1.15288200  | -0.83511500 |
| C | 1.98398800  | -0.36207400 | -0.07996100 |
| H | 1.97028600  | -0.98024100 | -0.99737800 |
| H | 2.01875600  | -1.09131900 | 0.74358200  |
| C | 3.21760700  | 0.47753800  | -0.05348400 |
| H | 3.14771200  | 1.51209700  | -0.37693800 |
| C | 4.56639300  | -0.13174400 | 0.12366300  |
| H | 4.89230400  | -0.68221300 | -0.77559500 |
| H | 5.33158800  | 0.62081600  | 0.33009500  |
| H | 4.57545800  | -0.86041300 | 0.94400300  |

**TS18:  $\text{H} + \text{CH}_3(\text{CH}_2)_6\text{CH}_3 \rightarrow \text{H}_2 + \text{CH}_3\text{CH}(\text{CH}_2)_5\text{CH}_3$**

|   |             |            |             |
|---|-------------|------------|-------------|
| C | -4.54176800 | 0.27471600 | -0.05402700 |
| H | -4.61375500 | 0.67566400 | -1.07008500 |
| H | -4.59735100 | 1.12059100 | 0.63860400  |

|   |             |             |             |
|---|-------------|-------------|-------------|
| H | -5.42079100 | -0.35276100 | 0.11785100  |
| C | -3.24373500 | -0.51467100 | 0.13871400  |
| H | -3.21599600 | -0.92920100 | 1.15384800  |
| H | -3.23649000 | -1.37595400 | -0.54066600 |
| C | -1.98267900 | 0.32408900  | -0.09746600 |
| H | -1.99121600 | 1.18690100  | 0.58139000  |
| H | -2.01061000 | 0.73844400  | -1.11381900 |
| C | -0.67846700 | -0.45742500 | 0.09471000  |
| H | -0.67046600 | -1.32005400 | -0.58457500 |
| H | -0.65182800 | -0.87150200 | 1.11095400  |
| C | 0.58080100  | 0.38377700  | -0.14043100 |
| H | 0.57732500  | 1.24247900  | 0.54173100  |
| H | 0.55482200  | 0.79997400  | -1.15563500 |
| C | 1.88362900  | -0.40241800 | 0.04694800  |
| H | 1.89050700  | -1.26150900 | -0.64230500 |
| H | 1.91398100  | -0.83333800 | 1.05629500  |
| C | 3.13827200  | 0.41451900  | -0.18393000 |
| H | 3.13017100  | 1.34033600  | 0.74773000  |
| H | 3.09060700  | 1.02703600  | -1.08867400 |
| C | 4.45983700  | -0.30316300 | -0.01903800 |
| H | 4.58117600  | -1.07963000 | -0.78501500 |
| H | 5.30485000  | 0.38426500  | -0.11052300 |
| H | 4.52681400  | -0.79344900 | 0.95701200  |
| H | 3.14290900  | 1.98515400  | 1.47300100  |

**H-R19:  $\text{H} + \text{CH}_3(\text{CH}_2)_6\text{CH}_3 \rightarrow \text{H}_2 + \text{CH}_3\text{CH}_2\text{CH}(\text{CH}_2)_4\text{CH}_3$**   
 **$\text{CH}_3\text{CH}_2\text{CH}(\text{CH}_2)_4\text{CH}_3$**

|   |             |             |             |
|---|-------------|-------------|-------------|
| C | 4.46322000  | -0.18594200 | 0.07441500  |
| H | 4.58271300  | -0.81418700 | -0.81404100 |
| H | 4.52325400  | -0.83936500 | 0.95063300  |
| H | 5.31465600  | 0.49930600  | 0.11284100  |
| C | 3.13379400  | 0.57368000  | 0.04078000  |
| H | 3.06137900  | 1.22136100  | 0.92301900  |
| H | 3.11732000  | 1.24245600  | -0.82844300 |
| C | 1.90969900  | -0.34761600 | -0.00963600 |
| H | 1.92624600  | -1.01644600 | 0.86095800  |
| H | 1.98349000  | -0.99719900 | -0.89184900 |
| C | 0.57583500  | 0.40519000  | -0.04519700 |
| H | 0.55843100  | 1.07132600  | -0.91705100 |
| H | 0.49820000  | 1.05331900  | 0.83608400  |
| C | -0.64941800 | -0.51833400 | -0.09675100 |
| H | -0.63972200 | -1.19212900 | 0.77307800  |
| H | -0.54885200 | -1.19011100 | -0.96985200 |

|   |             |             |             |
|---|-------------|-------------|-------------|
| C | -1.95627800 | 0.19993600  | -0.15944900 |
| H | -1.97471900 | 1.20985300  | -0.56260300 |
| C | -3.25277100 | -0.51435400 | 0.03275000  |
| H | -3.19087700 | -1.15398100 | 0.92529500  |
| H | -3.41800200 | -1.21964400 | -0.80215000 |
| C | -4.46729300 | 0.41439800  | 0.14450800  |
| H | -4.57284200 | 1.03091700  | -0.75328400 |
| H | -5.39246200 | -0.15482200 | 0.26804500  |
| H | -4.36894100 | 1.08759500  | 1.00080400  |

**TS19:  $\text{H} + \text{CH}_3(\text{CH}_2)_6\text{CH}_3 \rightarrow \text{H}_2 + \text{CH}_3\text{CH}_2\text{CH}(\text{CH}_2)_4\text{CH}_3$**

|   |             |             |             |
|---|-------------|-------------|-------------|
| C | 4.52791300  | -0.22839500 | 0.05507700  |
| H | 4.61663100  | -1.05220900 | -0.66041100 |
| H | 4.59975800  | -0.65574800 | 1.06029900  |
| H | 5.38987500  | 0.42920800  | -0.08791400 |
| C | 3.20947200  | 0.52791200  | -0.13164300 |
| H | 3.16628300  | 1.36629300  | 0.57416400  |
| H | 3.18276000  | 0.97341500  | -1.13362900 |
| C | 1.97138600  | -0.35535200 | 0.06018600  |
| H | 1.99888500  | -0.80076900 | 1.06324700  |
| H | 2.01483700  | -1.19536500 | -0.64573000 |
| C | 0.64801800  | 0.39482700  | -0.12392100 |
| H | 0.61884200  | 0.83800000  | -1.12760800 |
| H | 0.60399800  | 1.23328600  | 0.58153700  |
| C | -0.58843400 | -0.49134900 | 0.07037800  |
| H | -0.56312000 | -0.94545500 | 1.06951500  |
| H | -0.54563000 | -1.33227900 | -0.63930600 |
| C | -1.90451100 | 0.23541500  | -0.11574900 |
| H | -1.92725700 | 0.86075800  | -1.01393100 |
| H | -1.93359600 | 1.14611000  | 0.83555900  |
| C | -3.17142500 | -0.57342100 | 0.07589200  |
| H | -3.16497200 | -1.02333400 | 1.07625200  |
| H | -3.15996300 | -1.41759400 | -0.62970900 |
| C | -4.45639500 | 0.23640600  | -0.12132600 |
| H | -4.50316900 | 0.66218600  | -1.12839100 |
| H | -5.34266700 | -0.38835600 | 0.01723500  |
| H | -4.51494700 | 1.06310500  | 0.59216900  |
| H | -1.95270100 | 1.76249000  | 1.58329100  |

**H-R20:  $\text{H} + \text{CH}_3(\text{CH}_2)_6\text{CH}_3 \rightarrow \text{H}_2 + \text{CH}_3(\text{CH}_2)_2\text{CH}(\text{CH}_2)_3\text{CH}_3$   
 $\text{CH}_3(\text{CH}_2)_2\text{CH}(\text{CH}_2)_3\text{CH}_3$**

|   |             |            |             |
|---|-------------|------------|-------------|
| C | -4.45410200 | 0.37618100 | 0.12745100  |
| H | -4.54626100 | 1.01603700 | -0.75591900 |



|   |             |             |             |
|---|-------------|-------------|-------------|
| H | -4.43505300 | 1.02842000  | 1.00635300  |
| H | -5.35773000 | -0.23671800 | 0.18879700  |
| C | -3.19342600 | -0.49018100 | 0.05389700  |
| H | -3.14965100 | -1.14572200 | 0.93231200  |
| H | -3.25683300 | -1.15398900 | -0.81713300 |
| C | -1.90101700 | 0.32875200  | -0.02907400 |
| H | -1.83270500 | 0.99084300  | 0.84275000  |
| H | -1.94389400 | 0.98457600  | -0.90804500 |
| C | -0.63196600 | -0.53107200 | -0.10691900 |
| H | -0.72227700 | -1.21667800 | -0.97034800 |
| H | -0.58297900 | -1.19541900 | 0.76902500  |
| C | 0.63435800  | 0.25191900  | -0.21279100 |
| H | 0.58780100  | 1.26251100  | -0.61194400 |
| C | 1.97134600  | -0.39656900 | -0.07372100 |
| H | 2.15922600  | -1.06051400 | -0.93856400 |
| H | 1.96709500  | -1.07073600 | 0.79609000  |
| C | 3.14215800  | 0.58917600  | 0.04783800  |
| H | 2.97982200  | 1.22933300  | 0.92224600  |
| H | 3.13932200  | 1.25468600  | -0.82352200 |
| C | 4.50362300  | -0.10154000 | 0.16003400  |
| H | 4.70633400  | -0.72310100 | -0.71806300 |
| H | 5.31468500  | 0.62693400  | 0.24508600  |
| H | 4.54726000  | -0.75045900 | 1.04059300  |

**TS20:  $\text{H} + \text{CH}_3(\text{CH}_2)_6\text{CH}_3 \rightarrow \text{H}_2 + \text{CH}_3(\text{CH}_2)_2\text{CH}(\text{CH}_2)_3\text{CH}_3$**

|   |             |             |             |
|---|-------------|-------------|-------------|
| C | 4.49892800  | 0.25947100  | -0.09472700 |
| H | 4.55958400  | 1.10119500  | 0.60235400  |
| H | 4.55823100  | 0.66654300  | -1.10914200 |
| H | 5.38145700  | -0.36655500 | 0.06348900  |
| C | 3.20575100  | -0.53519400 | 0.10801900  |
| H | 3.19274700  | -1.39188400 | -0.57716700 |
| H | 3.19119700  | -0.95626000 | 1.12064400  |
| C | 1.94086500  | 0.30299600  | -0.10687500 |
| H | 1.95510300  | 0.72594900  | -1.11969400 |
| H | 1.95086100  | 1.15748800  | 0.58071700  |
| C | 0.64243800  | -0.48808500 | 0.09022300  |
| H | 0.62539900  | -0.92403200 | 1.09760500  |
| H | 0.63146800  | -1.34325400 | -0.60349800 |
| C | -0.61649000 | 0.32730100  | -0.12340300 |
| H | -0.58012900 | 0.94545900  | -1.02592300 |
| H | -0.59483600 | 1.24537300  | 0.82094800  |
| C | -1.93941300 | -0.38938200 | 0.05309300  |
| H | -1.98039100 | -0.83575500 | 1.05532900  |

|   |             |             |             |
|---|-------------|-------------|-------------|
| H | -1.98033500 | -1.23558700 | -0.65060600 |
| C | -3.16855900 | 0.50209000  | -0.16248800 |
| H | -3.12309400 | 0.93867800  | -1.16744000 |
| H | -3.12896400 | 1.34340800  | 0.53838200  |
| C | -4.49233700 | -0.24748200 | 0.01011700  |
| H | -4.58120900 | -0.66634200 | 1.01743400  |
| H | -5.34813200 | 0.41386300  | -0.15019100 |
| H | -4.57514300 | -1.07603200 | -0.70063200 |
| H | -0.58091200 | 1.86745700  | 1.56363500  |

### 2.1.9 C9 (*n*-C<sub>9</sub>H<sub>20</sub>)

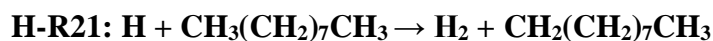

*n*-C<sub>9</sub>H<sub>20</sub>

|   |             |             |             |
|---|-------------|-------------|-------------|
| C | 5.12585300  | -0.37071200 | 0.00000200  |
| H | 5.17126900  | -1.01633500 | -0.88288000 |
| H | 5.17128300  | -1.01630100 | 0.88290700  |
| H | 6.02293500  | 0.25485500  | -0.00001800 |
| C | 3.85047700  | 0.47733900  | -0.00000500 |
| H | 3.85066600  | 1.13718600  | 0.87623500  |
| H | 3.85066600  | 1.13717000  | -0.87625700 |
| C | 2.56602500  | -0.35945300 | 0.00000100  |
| H | 2.56666500  | -1.02032000 | 0.87679700  |
| H | 2.56666000  | -1.02032200 | -0.87679400 |
| C | 1.28328800  | 0.47955800  | 0.00000300  |
| H | 1.28350100  | 1.14016400  | -0.87681300 |
| H | 1.28349900  | 1.14015600  | 0.87682400  |
| C | 0.00000000  | -0.35900300 | -0.00000100 |
| H | 0.00000000  | -1.01964100 | 0.87674700  |
| H | 0.00000000  | -1.01963200 | -0.87675700 |
| C | -1.28328800 | 0.47955800  | 0.00000300  |
| H | -1.28350100 | 1.14016300  | -0.87681400 |
| H | -1.28350000 | 1.14015700  | 0.87682400  |
| C | -2.56602500 | -0.35945300 | 0.00000000  |
| H | -2.56666300 | -1.02032200 | 0.87679500  |
| H | -2.56666100 | -1.02032000 | -0.87679600 |
| C | -3.85047700 | 0.47733900  | 0.00000000  |
| H | -3.85066600 | 1.13717800  | -0.87624600 |
| H | -3.85066700 | 1.13717800  | 0.87624600  |
| C | -5.12585300 | -0.37071200 | -0.00000100 |
| H | -5.17127700 | -1.01631800 | 0.88289200  |
| H | -6.02293500 | 0.25485500  | -0.00000300 |
| H | -5.17127500 | -1.01631800 | -0.88289500 |

**CH<sub>2</sub>(CH<sub>2</sub>)<sub>7</sub>CH<sub>3</sub>**

|   |             |             |             |
|---|-------------|-------------|-------------|
| C | -5.05426800 | -0.35260200 | 0.01194800  |
| H | -5.10541200 | -0.95992900 | 0.92126400  |
| H | -5.10241500 | -1.03462700 | -0.84293400 |
| H | -5.94720800 | 0.27817300  | -0.01625600 |
| C | -3.77353600 | 0.48657400  | -0.02140500 |
| H | -3.76875700 | 1.11002600  | -0.92388600 |
| H | -3.77029800 | 1.18154000  | 0.82718200  |
| C | -2.49441900 | -0.35766500 | 0.01408600  |
| H | -2.49821900 | -1.05312100 | -0.83546300 |
| H | -2.50008700 | -0.98267100 | 0.91674500  |
| C | -1.20666800 | 0.47298100  | -0.01797100 |
| H | -1.20395800 | 1.16829100  | 0.83151400  |
| H | -1.20175000 | 1.09757600  | -0.92075900 |
| C | 0.07144400  | -0.37272500 | 0.01815800  |
| H | 0.06878100  | -1.06849000 | -0.83087400 |
| H | 0.06659900  | -0.99668500 | 0.92124300  |
| C | 1.35915400  | 0.45823600  | -0.01431800 |
| H | 1.36006600  | 1.15610800  | 0.83309100  |
| H | 1.36605100  | 1.07994400  | -0.91914000 |
| C | 2.63559500  | -0.38833200 | 0.02762700  |
| H | 2.63974000  | -1.08418400 | -0.82088500 |
| H | 2.63436500  | -1.00857500 | 0.93187400  |
| C | 3.92503400  | 0.44672100  | -0.00525500 |
| H | 3.93236200  | 1.15108000  | 0.83726300  |
| H | 3.90234400  | 1.08694600  | -0.90601500 |
| C | 5.17413600  | -0.36416200 | 0.00397600  |
| H | 5.19050200  | -1.36238700 | -0.41912900 |
| H | 6.11846700  | 0.06683400  | 0.31408800  |

**TS21: H + CH<sub>3</sub>(CH<sub>2</sub>)<sub>7</sub>CH<sub>3</sub> → H<sub>2</sub> + CH<sub>2</sub>(CH<sub>2</sub>)<sub>7</sub>CH<sub>3</sub>**

|   |            |             |             |
|---|------------|-------------|-------------|
| C | 5.19112900 | 0.39180100  | -0.04078800 |
| H | 5.22301700 | 1.20433100  | 0.69212300  |
| H | 5.24358100 | 0.84400400  | -1.03634200 |
| H | 6.09160300 | -0.21350700 | 0.09620400  |
| C | 3.92114000 | -0.44900400 | 0.11883200  |
| H | 3.93818500 | -1.27536500 | -0.60240700 |
| H | 3.91374500 | -0.91403100 | 1.11223000  |
| C | 2.63119800 | 0.35744700  | -0.06917300 |
| H | 2.63973500 | 0.82447900  | -1.06279600 |
| H | 2.61452400 | 1.18399000  | 0.65339900  |
| C | 1.35489700 | -0.47669300 | 0.08670600  |
| H | 1.34885100 | -0.94612600 | 1.07903300  |

|   |             |             |             |
|---|-------------|-------------|-------------|
| H | 1.37161400  | -1.30107700 | -0.63821200 |
| C | 0.06526400  | 0.33120000  | -0.09699100 |
| H | 0.07322900  | 0.80523600  | -1.08708100 |
| H | 0.04570200  | 1.15189700  | 0.63170700  |
| C | -1.21022400 | -0.50587900 | 0.05141900  |
| H | -1.21594100 | -0.98407400 | 1.03946400  |
| H | -1.19310500 | -1.32346700 | -0.68119300 |
| C | -2.49899800 | 0.30411400  | -0.12424000 |
| H | -2.49377500 | 0.78758200  | -1.10961400 |
| H | -2.52378700 | 1.11516600  | 0.61355700  |
| C | -3.77341400 | -0.53840800 | 0.01340000  |
| H | -3.78463500 | -1.03464600 | 0.99179400  |
| H | -3.74920200 | -1.35092200 | -0.72906000 |
| C | -5.04798900 | 0.24996300  | -0.16717500 |
| H | -5.07642800 | 0.91750200  | -1.02908100 |
| H | -5.97554000 | -0.30850400 | -0.04422700 |
| H | -5.12628500 | 1.12963100  | 0.87484700  |
| H | -5.16310900 | 1.70065200  | 1.60371700  |

**H-R22:  $\text{H} + \text{CH}_3(\text{CH}_2)_7\text{CH}_3 \rightarrow \text{H}_2 + \text{CH}_3\text{CH}(\text{CH}_2)_6\text{CH}_3$**   
 **$\text{CH}_3\text{CH}(\text{CH}_2)_6\text{CH}_3$**

|   |             |             |             |
|---|-------------|-------------|-------------|
| C | -5.07602300 | -0.35362200 | -0.01133800 |
| H | -5.13743200 | -0.93317200 | 0.91531900  |
| H | -5.11273400 | -1.06134900 | -0.84565900 |
| H | -5.96949000 | 0.27435700  | -0.06956100 |
| C | -3.79620500 | 0.48650700  | -0.05463000 |
| H | -3.78182600 | 1.08291400  | -0.97510900 |
| H | -3.80397400 | 1.20630600  | 0.77295600  |
| C | -2.51633900 | -0.35396900 | 0.02057600  |
| H | -2.50975200 | -1.07449000 | -0.80781200 |
| H | -2.53121000 | -0.95167000 | 0.94146800  |
| C | -1.22940100 | 0.47747100  | -0.02243900 |
| H | -1.23635400 | 1.19752100  | 0.80613600  |
| H | -1.21582900 | 1.07505300  | -0.94318800 |
| C | 0.04925700  | -0.36479300 | 0.05161700  |
| H | 0.05411800  | -1.08687700 | -0.77525500 |
| H | 0.03721300  | -0.96020400 | 0.97390400  |
| C | 1.33527300  | 0.46684600  | 0.00297000  |
| H | 1.33288200  | 1.18836600  | 0.82970400  |
| H | 1.35274100  | 1.05920200  | -0.91983400 |
| C | 2.61475200  | -0.37757400 | 0.07981000  |
| H | 2.62174800  | -1.11174500 | -0.74006900 |
| H | 2.57972300  | -0.99021100 | 1.00034600  |

|   |            |             |             |
|---|------------|-------------|-------------|
| C | 3.87809700 | 0.41641600  | 0.04773700  |
| H | 3.84525100 | 1.45576900  | 0.36152100  |
| C | 5.20418900 | -0.24292300 | -0.12114400 |
| H | 5.18803900 | -0.97983500 | -0.93397800 |
| H | 5.99628600 | 0.47940700  | -0.33404200 |
| H | 5.50900400 | -0.79549900 | 0.78420200  |

**TS22:  $\text{H} + \text{CH}_3(\text{CH}_2)_7\text{CH}_3 \rightarrow \text{H}_2 + \text{CH}_3\text{CH}(\text{CH}_2)_6\text{CH}_3$**

|   |             |             |             |
|---|-------------|-------------|-------------|
| C | 5.18161300  | -0.33197700 | 0.09473100  |
| H | 5.24398900  | -1.15590300 | -0.62342500 |
| H | 5.22602500  | -0.76609100 | 1.09867400  |
| H | 6.07115800  | 0.29039900  | -0.03693300 |
| C | 3.89692900  | 0.47812200  | -0.10153100 |
| H | 3.88259100  | 1.31606500  | 0.60619200  |
| H | 3.89769300  | 0.92690200  | -1.10241300 |
| C | 2.62159300  | -0.35344800 | 0.07647800  |
| H | 2.62147600  | -0.80307200 | 1.07810500  |
| H | 2.63702700  | -1.19245400 | -0.63175400 |
| C | 1.33058700  | 0.44930900  | -0.11774000 |
| H | 1.33275600  | 0.90090000  | -1.11835000 |
| H | 1.31504100  | 1.28636100  | 0.59229800  |
| C | 0.05599200  | -0.38397800 | 0.05700300  |
| H | 0.05503900  | -0.83797000 | 1.05638200  |
| H | 0.06970200  | -1.21922700 | -0.65552100 |
| C | -1.23370300 | 0.42194900  | -0.13215000 |
| H | -1.23184600 | 0.88100000  | -1.12906600 |
| H | -1.25330200 | 1.25087800  | 0.58561900  |
| C | -2.50693200 | -0.41629800 | 0.03232700  |
| H | -2.51184100 | -0.89171500 | 1.02195100  |
| H | -2.49174500 | -1.24412700 | -0.69399600 |
| C | -3.79106900 | 0.36617900  | -0.15101600 |
| H | -3.77340600 | 1.01984900  | -1.02759500 |
| H | -3.80528100 | 1.24917500  | 0.82145700  |
| C | -5.08558600 | -0.40345900 | -0.00733100 |
| H | -5.12597100 | -0.93900900 | 0.94614000  |
| H | -5.95450600 | 0.25771200  | -0.06056700 |
| H | -5.18804900 | -1.14861000 | -0.80648300 |
| H | -3.83309700 | 1.86054100  | 1.57466000  |

**H-R23:  $\text{H} + \text{CH}_3(\text{CH}_2)_7\text{CH}_3 \rightarrow \text{H}_2 + \text{CH}_3\text{CH}_2\text{CH}(\text{CH}_2)_5\text{CH}_3$**   
 **$\text{CH}_3\text{CH}_2\text{CH}(\text{CH}_2)_5\text{CH}_3$**

|   |             |             |            |
|---|-------------|-------------|------------|
| C | -5.06856200 | -0.43800800 | 0.06823700 |
| H | -5.07345900 | -1.10507500 | 0.93617400 |

|   |             |             |             |
|---|-------------|-------------|-------------|
| H | -5.12525000 | -1.06347600 | -0.82835100 |
| H | -5.97912200 | 0.16632300  | 0.10923800  |
| C | -3.81337300 | 0.43935900  | 0.05209600  |
| H | -3.85323600 | 1.11801100  | -0.80872800 |
| H | -3.80380000 | 1.07960700  | 0.94269300  |
| C | -2.51078900 | -0.36717000 | -0.00215800 |
| H | -2.52124000 | -1.00916200 | -0.89275600 |
| H | -2.47152800 | -1.04605000 | 0.85976800  |
| C | -1.24825500 | 0.50160600  | -0.01983400 |
| H | -1.23915300 | 1.14369300  | 0.87062200  |
| H | -1.28806000 | 1.17990300  | -0.88218500 |
| C | 0.05181200  | -0.30767800 | -0.07290000 |
| H | 0.04485200  | -0.94764500 | -0.96428200 |
| H | 0.09659600  | -0.98458000 | 0.78873200  |
| C | 1.31635300  | 0.56281300  | -0.09194400 |
| H | 1.33139600  | 1.21017400  | 0.79756500  |
| H | 1.24913500  | 1.26368900  | -0.94514200 |
| C | 2.59090400  | -0.20975200 | -0.17072600 |
| H | 2.56968500  | -1.20177900 | -0.61607800 |
| C | 3.91554700  | 0.43654100  | 0.06522500  |
| H | 3.87082700  | 1.04063400  | 0.98319300  |
| H | 4.12304200  | 1.16770200  | -0.73735900 |
| C | 5.08553000  | -0.55034500 | 0.15083000  |
| H | 5.17414000  | -1.13342000 | -0.77083300 |
| H | 6.03386700  | -0.02951500 | 0.30769300  |
| H | 4.94630000  | -1.25323700 | 0.97707700  |

**TS23:  $\text{H} + \text{CH}_3(\text{CH}_2)_7\text{CH}_3 \rightarrow \text{H}_2 + \text{CH}_3\text{CH}_2\text{CH}(\text{CH}_2)_5\text{CH}_3$**

|   |             |             |             |
|---|-------------|-------------|-------------|
| C | -5.15326100 | 0.38496800  | -0.06683200 |
| H | -5.20026100 | 0.84560600  | -1.05878100 |
| H | -5.18603400 | 1.19136900  | 0.67273600  |
| H | -6.05587900 | -0.21906500 | 0.06128400  |
| C | -3.88625100 | -0.46059500 | 0.09129700  |
| H | -3.88431000 | -0.93350400 | 1.08097900  |
| H | -3.90237600 | -1.28106000 | -0.63666900 |
| C | -2.59356900 | 0.34418700  | -0.08455700 |
| H | -2.57876300 | 1.16599500  | 0.64326100  |
| H | -2.59543000 | 0.81734500  | -1.07530300 |
| C | -1.32022800 | -0.49394000 | 0.07374600  |
| H | -1.33480700 | -1.31484900 | -0.65526700 |
| H | -1.32056300 | -0.96771100 | 1.06395200  |
| C | -0.02910100 | 0.31352000  | -0.09842900 |
| H | -0.01120700 | 1.13112100  | 0.63218600  |

|   |             |             |             |
|---|-------------|-------------|-------------|
| H | -0.02684500 | 0.78790600  | -1.08812200 |
| C | 1.24267700  | -0.52889800 | 0.05828200  |
| H | 1.22794500  | -1.34637400 | -0.67940400 |
| H | 1.24245300  | -1.01730900 | 1.04144800  |
| C | 2.52790800  | 0.25500200  | -0.11036600 |
| H | 2.53084100  | 1.12873900  | 0.87564400  |
| H | 2.51824800  | 0.91513900  | -0.98350300 |
| C | 3.82681200  | -0.51075000 | 0.03987600  |
| H | 3.84421600  | -1.32296800 | -0.70212500 |
| H | 3.84428700  | -1.00377500 | 1.01955900  |
| C | 5.07786600  | 0.35706500  | -0.12719800 |
| H | 5.10829300  | 1.15312600  | 0.62194700  |
| H | 5.98877400  | -0.23778600 | -0.02032300 |
| H | 5.10177400  | 0.82830700  | -1.11464100 |
| H | 2.53252700  | 1.71640100  | 1.64622900  |

**H-R24:  $\text{H} + \text{CH}_3(\text{CH}_2)_7\text{CH}_3 \rightarrow \text{H}_2 + \text{CH}_3(\text{CH}_2)_2\text{CH}(\text{CH}_2)_4\text{CH}_3$**   
 **$\text{CH}_3(\text{CH}_2)_2\text{CH}(\text{CH}_2)_4\text{CH}_3$**

|   |             |             |             |
|---|-------------|-------------|-------------|
| C | 5.11041800  | -0.25792300 | 0.11837100  |
| H | 5.23054700  | -0.86470600 | -0.78479900 |
| H | 5.13876400  | -0.93608500 | 0.97722400  |
| H | 5.97737800  | 0.40478500  | 0.19032400  |
| C | 3.80047000  | 0.53476200  | 0.08271800  |
| H | 3.72830700  | 1.16062300  | 0.98058600  |
| H | 3.81510500  | 1.22623500  | -0.76857400 |
| C | 2.55573200  | -0.35483700 | -0.01262300 |
| H | 2.54175000  | -1.04680500 | 0.83973200  |
| H | 2.62906000  | -0.98221000 | -0.91080400 |
| C | 1.24075600  | 0.43042500  | -0.04942000 |
| H | 1.25417500  | 1.12066200  | -0.90238300 |
| H | 1.16304600  | 1.05546400  | 0.84841200  |
| C | -0.00461800 | -0.46170600 | -0.14771800 |
| H | -0.02464900 | -1.16109500 | 0.70162900  |
| H | 0.09454000  | -1.10991200 | -1.03858500 |
| C | -1.29359000 | 0.28844600  | -0.20900100 |
| H | -1.27974400 | 1.31589900  | -0.56526100 |
| C | -2.60988400 | -0.40391600 | -0.08488400 |
| H | -2.57761700 | -1.11172400 | 0.75721400  |
| H | -2.78648700 | -1.03821000 | -0.97400700 |
| C | -3.80780600 | 0.54104800  | 0.08608700  |
| H | -3.83336200 | 1.24014300  | -0.75814600 |
| H | -3.65567300 | 1.15071500  | 0.98381000  |
| C | -5.14713400 | -0.19389300 | 0.18298500  |

|   |             |             |             |
|---|-------------|-------------|-------------|
| H | -5.16152500 | -0.87978000 | 1.03608300  |
| H | -5.97820800 | 0.50591600  | 0.30661800  |
| H | -5.34147300 | -0.78435200 | -0.71816500 |

**TS24:  $\text{H} + \text{CH}_3(\text{CH}_2)_7\text{CH}_3 \rightarrow \text{H}_2 + \text{CH}_3(\text{CH}_2)_2\text{CH}(\text{CH}_2)_4\text{CH}_3$**

|   |             |             |             |
|---|-------------|-------------|-------------|
| C | -5.14778900 | -0.33746000 | 0.06016800  |
| H | -5.20159700 | -0.77482900 | 1.06222500  |
| H | -5.20894800 | -1.15846700 | -0.66146900 |
| H | -6.03325200 | 0.28976100  | -0.07564800 |
| C | -3.85807200 | 0.46748000  | -0.12370800 |
| H | -3.84934800 | 0.91987000  | -1.12292400 |
| H | -3.84473600 | 1.30256100  | 0.58725800  |
| C | -2.58816500 | -0.37091000 | 0.06070800  |
| H | -2.60218400 | -1.20749000 | -0.65052800 |
| H | -2.59742400 | -0.82345200 | 1.06089700  |
| C | -1.29333800 | 0.42809300  | -0.12082500 |
| H | -1.27674000 | 1.26082800  | 0.59263100  |
| H | -1.28417100 | 0.88170200  | -1.12022100 |
| C | -0.02512500 | -0.41475000 | 0.06002900  |
| H | -0.03936100 | -1.24830500 | -0.65942500 |
| H | -0.03093400 | -0.88134700 | 1.05368400  |
| C | 1.26331800  | 0.36153900  | -0.12087500 |
| H | 1.26513200  | 1.25379200  | 0.84806400  |
| H | 1.25661300  | 1.00470000  | -1.00638600 |
| C | 2.55889200  | -0.40548100 | 0.04661600  |
| H | 2.57488800  | -1.23570200 | -0.67689800 |
| H | 2.57700100  | -0.87677100 | 1.03807600  |
| C | 3.82009400  | 0.44680300  | -0.13990600 |
| H | 3.80486800  | 1.27263600  | 0.58013100  |
| H | 3.79736200  | 0.90787100  | -1.13465800 |
| C | 5.11571700  | -0.35227900 | 0.02389400  |
| H | 5.17583500  | -1.16602500 | -0.70604400 |
| H | 5.99507600  | 0.28266600  | -0.11424900 |
| H | 5.18214100  | -0.79795000 | 1.02142200  |
| H | 1.26658800  | 1.85574800  | 1.60745300  |

**H-R25:  $\text{H} + \text{CH}_3(\text{CH}_2)_7\text{CH}_3 \rightarrow \text{H}_2 + \text{CH}_3(\text{CH}_2)_3\text{CH}(\text{CH}_2)_3\text{CH}_3$**

|   |            |             |             |
|---|------------|-------------|-------------|
| C | 5.07000100 | -0.53507400 | 0.13068900  |
| H | 5.14134400 | -1.11479100 | -0.79510600 |
| H | 5.00587400 | -1.24600500 | 0.96056700  |
| H | 6.00282300 | 0.02424900  | 0.24448000  |
| C | 3.85636100 | 0.39853400  | 0.10656500  |



|   |             |             |             |
|---|-------------|-------------|-------------|
| H | 3.83215200  | 0.98953500  | 1.03037800  |
| H | 3.96709800  | 1.12022800  | -0.71216500 |
| C | 2.52529300  | -0.34371100 | -0.05201500 |
| H | 2.41050700  | -1.06513500 | 0.76624500  |
| H | 2.54740200  | -0.93287500 | -0.97770900 |
| C | 1.30339400  | 0.58475000  | -0.07738700 |
| H | 1.44086500  | 1.32779400  | -0.88531700 |
| H | 1.27665800  | 1.18312000  | 0.84585200  |
| C | 0.00000000  | -0.12073600 | -0.25421900 |
| H | 0.00000000  | -1.10181200 | -0.72337400 |
| C | -1.30339400 | 0.58475000  | -0.07738600 |
| H | -1.44086500 | 1.32779500  | -0.88531400 |
| H | -1.27665700 | 1.18311900  | 0.84585400  |
| C | -2.52529300 | -0.34371100 | -0.05201500 |
| H | -2.41050700 | -1.06513600 | 0.76624400  |
| H | -2.54740200 | -0.93287400 | -0.97771100 |
| C | -3.85636100 | 0.39853400  | 0.10656600  |
| H | -3.96709800 | 1.12022900  | -0.71216300 |
| H | -3.83215200 | 0.98953400  | 1.03038000  |
| C | -5.07000100 | -0.53507400 | 0.13068800  |
| H | -5.00587500 | -1.24600600 | 0.96056500  |
| H | -6.00282300 | 0.02424900  | 0.24447900  |
| H | -5.14134400 | -1.11479000 | -0.79510700 |

**TS25:  $\text{H} + \text{CH}_3(\text{CH}_2)_7\text{CH}_3 \rightarrow \text{H}_2 + \text{CH}_3(\text{CH}_2)_3\text{CH}(\text{CH}_2)_3\text{CH}_3$**

|   |             |             |             |
|---|-------------|-------------|-------------|
| C | -5.40808200 | -0.14115900 | 0.79695700  |
| H | -5.07412100 | -1.18366400 | 0.79231600  |
| H | -5.05015100 | 0.32380100  | -0.12700100 |
| H | -6.50116600 | -0.14300900 | 0.76574000  |
| C | -4.88462000 | 0.60239800  | 2.02915600  |
| H | -5.26338800 | 1.63164400  | 2.02237500  |
| H | -5.28845500 | 0.13593600  | 2.93619400  |
| C | -3.35453700 | 0.62974700  | 2.11376800  |
| H | -2.94938700 | 1.09933500  | 1.20926000  |
| H | -2.97463000 | -0.40008700 | 2.11970700  |
| C | -2.82376400 | 1.36956700  | 3.34751400  |
| H | -3.23184300 | 0.89772900  | 4.25492800  |
| H | -3.20443500 | 2.39926400  | 3.35228800  |
| C | -1.31230900 | 1.39369600  | 3.45023800  |
| H | -0.90674400 | 2.07121200  | 2.39522100  |
| H | -0.85420200 | 0.41650200  | 3.26799200  |
| C | -0.71386600 | 2.11882000  | 4.63840600  |
| H | -1.10362400 | 1.66488400  | 5.56280800  |

|   |             |            |            |
|---|-------------|------------|------------|
| H | -1.06856000 | 3.15769000 | 4.64618500 |
| C | 0.81891700  | 2.09762500 | 4.67493700 |
| H | 1.20788700  | 2.54531000 | 3.75242700 |
| H | 1.16436100  | 1.05575900 | 4.67821700 |
| C | 1.41188700  | 2.83055600 | 5.88331500 |
| H | 1.01643200  | 2.38681300 | 6.80530600 |
| H | 1.06924100  | 3.87240400 | 5.87645100 |
| C | 2.94261700  | 2.79808200 | 5.91778800 |
| H | 3.36824600  | 3.26552700 | 5.02427200 |
| H | 3.33398900  | 3.33034900 | 6.78918700 |
| H | 3.31552500  | 1.76987300 | 5.96168900 |
| H | -0.64348900 | 2.62464000 | 1.64572300 |

### 2.1.10 C10 (*n*-C<sub>10</sub>H<sub>22</sub>)

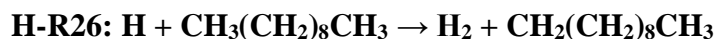

*n*-C<sub>10</sub>H<sub>22</sub>

|   |             |             |             |
|---|-------------|-------------|-------------|
| C | 5.77660500  | -0.28684000 | 0.00000300  |
| H | 6.65746100  | 0.36138400  | -0.00000300 |
| H | 5.83850900  | -0.93107800 | -0.88289300 |
| H | 5.83851000  | -0.93106300 | 0.88291000  |
| C | 4.48011200  | 0.52857600  | -0.00000500 |
| H | 4.46370600  | 1.18821300  | -0.87624800 |
| H | 4.46370200  | 1.18822100  | 0.87623200  |
| C | 3.21714900  | -0.34027500 | -0.00000600 |
| H | 3.23430400  | -1.00091900 | -0.87680800 |
| H | 3.23430700  | -1.00092200 | 0.87679300  |
| C | 1.91385500  | 0.46645500  | 0.00000000  |
| H | 1.89773400  | 1.12689100  | -0.87680000 |
| H | 1.89773700  | 1.12688800  | 0.87680300  |
| C | 0.65167400  | -0.40350500 | 0.00000200  |
| H | 0.66784000  | -1.06394400 | 0.87676600  |
| H | 0.66783400  | -1.06393800 | -0.87676700 |
| C | -0.65167400 | 0.40350500  | 0.00000700  |
| H | -0.66783800 | 1.06394500  | -0.87675600 |
| H | -0.66783600 | 1.06393700  | 0.87677700  |
| C | -1.91385600 | -0.46645500 | 0.00000400  |
| H | -1.89773700 | -1.12689000 | 0.87680400  |
| H | -1.89773400 | -1.12688800 | -0.87679800 |
| C | -3.21714900 | 0.34027500  | 0.00000300  |
| H | -3.23430300 | 1.00092300  | -0.87679600 |
| H | -3.23430700 | 1.00091900  | 0.87680500  |
| C | -4.48011100 | -0.52857700 | -0.00000200 |
| H | -4.46370600 | -1.18821800 | 0.87623700  |

|   |             |             |             |
|---|-------------|-------------|-------------|
| H | -4.46370100 | -1.18821600 | -0.87624400 |
| C | -5.77660500 | 0.28683900  | -0.00000500 |
| H | -5.83850700 | 0.93107100  | -0.88290600 |
| H | -6.65746100 | -0.36138500 | -0.00000800 |
| H | -5.83851200 | 0.93106900  | 0.88289700  |

**CH<sub>2</sub>(CH<sub>2</sub>)<sub>8</sub>CH<sub>3</sub>**

|   |             |             |             |
|---|-------------|-------------|-------------|
| C | -5.82494800 | 0.27545300  | 0.00054000  |
| H | -6.75813200 | -0.17783600 | -0.31152300 |
| H | -5.86667200 | 1.27047800  | 0.42941700  |
| C | -4.55543900 | -0.50319300 | 0.00508400  |
| H | -4.54551200 | -1.20390300 | -0.84041000 |
| H | -4.51547300 | -1.14635500 | 0.90314900  |
| C | -3.28805500 | 0.36504700  | -0.02536000 |
| H | -3.30359100 | 0.98862300  | -0.92717400 |
| H | -3.30958400 | 1.05729700  | 0.82582800  |
| C | -1.98997800 | -0.44814900 | 0.01252400  |
| H | -1.97349600 | -1.14283900 | -0.83733900 |
| H | -1.97991600 | -1.07302300 | 0.91513100  |
| C | -0.72442700 | 0.41623600  | -0.01806200 |
| H | -0.73913500 | 1.10892800  | 0.83337000  |
| H | -0.73665400 | 1.04324700  | -0.91897300 |
| C | 0.57531200  | -0.39596100 | 0.01401400  |
| H | 0.58983400  | -1.08818900 | -0.83783300 |
| H | 0.58752900  | -1.02360800 | 0.91457600  |
| C | 1.84104100  | 0.46830700  | -0.01638700 |
| H | 1.82711900  | 1.15991600  | 0.83601200  |
| H | 1.82810300  | 1.09669500  | -0.91645400 |
| C | 3.14090700  | -0.34334900 | 0.01359600  |
| H | 3.15539500  | -1.03574200 | -0.83835300 |
| H | 3.15538700  | -0.97137100 | 0.91408100  |
| C | 4.40739400  | 0.51983500  | -0.01835600 |
| H | 4.39353600  | 1.21172600  | 0.83263200  |
| H | 4.39369200  | 1.14631900  | -0.91863700 |
| C | 5.70051900  | -0.30021900 | 0.01252300  |
| H | 5.75921300  | -0.97836800 | -0.84479200 |
| H | 6.58392700  | 0.34395600  | -0.01306600 |
| H | 5.76047800  | -0.90999100 | 0.91966700  |

**TS26: H + CH<sub>3</sub>(CH<sub>2</sub>)<sub>8</sub>CH<sub>3</sub> → H<sub>2</sub> + CH<sub>2</sub>(CH<sub>2</sub>)<sub>8</sub>CH<sub>3</sub>**

|   |            |             |             |
|---|------------|-------------|-------------|
| C | 5.69474000 | 0.18177200  | -0.14575500 |
| H | 6.60969100 | -0.39744500 | -0.02445900 |
| H | 5.78476000 | 1.04676300  | 0.90808400  |

|   |             |             |             |
|---|-------------|-------------|-------------|
| H | 5.74245900  | 0.85966000  | -0.99867700 |
| C | 4.40282800  | -0.58196500 | 0.01647200  |
| H | 4.39963200  | -1.09607000 | 0.98563800  |
| H | 4.36356800  | -1.37997200 | -0.74092300 |
| C | 3.14743000  | 0.29049500  | -0.10990300 |
| H | 3.18428000  | 1.08343400  | 0.64676800  |
| H | 3.15941200  | 0.79669500  | -1.08373700 |
| C | 1.84056700  | -0.49578900 | 0.03784100  |
| H | 1.83012000  | -0.99985000 | 1.01291200  |
| H | 1.80996600  | -1.29311100 | -0.71628200 |
| C | 0.58447200  | 0.37274200  | -0.09505400 |
| H | 0.59476500  | 0.87595100  | -1.07063600 |
| H | 0.61588700  | 1.17080800  | 0.65790400  |
| C | -0.72373200 | -0.41200300 | 0.05462200  |
| H | -0.73608200 | -0.91102300 | 1.03231900  |
| H | -0.75260700 | -1.21353400 | -0.69500000 |
| C | -1.98011800 | 0.45502000  | -0.08571800 |
| H | -1.96925400 | 0.95090100  | -1.06509500 |
| H | -1.94957600 | 1.25901200  | 0.66115800  |
| C | -3.28856600 | -0.32793600 | 0.06908000  |
| H | -3.30233200 | -0.82025800 | 1.05035600  |
| H | -3.31847100 | -1.13504700 | -0.67475800 |
| C | -4.54556000 | 0.53721500  | -0.07745100 |
| H | -4.53409200 | 1.02565500  | -1.05953400 |
| H | -4.51508900 | 1.34550900  | 0.66342000  |
| C | -5.84763900 | -0.25262500 | 0.08393800  |
| H | -5.90551100 | -0.72231500 | 1.07104500  |
| H | -6.72366900 | 0.39236900  | -0.02814300 |
| H | -5.92352100 | -1.04823000 | -0.66422900 |
| H | 5.82912900  | 1.60853900  | 1.64344200  |

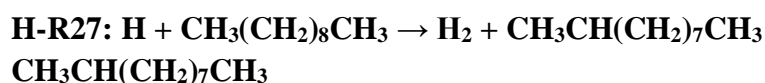

|   |             |             |             |
|---|-------------|-------------|-------------|
| C | -5.85296100 | -0.15480100 | 0.14178000  |
| H | -6.62552300 | 0.59080300  | 0.34609800  |
| H | -5.84908700 | -0.87635100 | 0.96841400  |
| H | -6.17778000 | -0.71670700 | -0.75078800 |
| C | -4.51225400 | 0.46819700  | -0.04841400 |
| H | -4.45613400 | 1.50006800  | -0.38295100 |
| C | -3.26906100 | -0.35720500 | -0.07312000 |
| H | -3.29108300 | -1.07873000 | 0.75761200  |
| H | -3.25262900 | -0.98407800 | -0.98456100 |
| C | -1.96861500 | 0.45602600  | -0.01325500 |

|   |             |             |             |
|---|-------------|-------------|-------------|
| H | -1.96763600 | 1.06195300  | 0.90085500  |
| H | -1.95135900 | 1.16525400  | -0.85040800 |
| C | -0.70420700 | -0.40851000 | -0.05425700 |
| H | -0.71049900 | -1.01694500 | -0.96807200 |
| H | -0.72450800 | -1.11863600 | 0.78269800  |
| C | 0.59568900  | 0.40182500  | 0.00389000  |
| H | 0.60036500  | 1.01280400  | 0.91585200  |
| H | 0.61834900  | 1.10945600  | -0.83501600 |
| C | 1.86080300  | -0.46322700 | -0.03075600 |
| H | 1.85579700  | -1.07486900 | -0.94239400 |
| H | 1.83789500  | -1.17042400 | 0.80857500  |
| C | 3.16135100  | 0.34581100  | 0.02693800  |
| H | 3.16738000  | 0.95774500  | 0.93852400  |
| H | 3.18566900  | 1.05312400  | -0.81243700 |
| C | 4.42681700  | -0.51881600 | -0.00708400 |
| H | 4.42182500  | -1.12889900 | -0.91866700 |
| H | 4.40271100  | -1.22591400 | 0.83108200  |
| C | 5.72088400  | 0.29813300  | 0.05270400  |
| H | 5.77188400  | 0.89133900  | 0.97131900  |
| H | 6.60345400  | -0.34713700 | 0.02522500  |
| H | 5.79023600  | 0.99154900  | -0.79151300 |

**TS27:  $\text{H} + \text{CH}_3(\text{CH}_2)_8\text{CH}_3 \rightarrow \text{H}_2 + \text{CH}_3\text{CH}(\text{CH}_2)_7\text{CH}_3$**

|   |             |             |             |
|---|-------------|-------------|-------------|
| C | -5.73360200 | -0.31946700 | -0.02277100 |
| H | -6.58554300 | 0.36393100  | -0.06939400 |
| H | -5.78970800 | -0.86587600 | 0.92371700  |
| H | -5.85278900 | -1.05156600 | -0.83158800 |
| C | -4.41991000 | 0.41935800  | -0.15381800 |
| H | -4.41477200 | 1.29027800  | 0.82971800  |
| H | -4.38389500 | 1.08336800  | -1.02201900 |
| C | -3.15619100 | -0.39721900 | 0.02232900  |
| H | -3.17712800 | -0.88777600 | 1.00432300  |
| H | -3.15834000 | -1.21371400 | -0.71688200 |
| C | -1.86178800 | 0.41146300  | -0.12384700 |
| H | -1.86307800 | 1.22822200  | 0.60796000  |
| H | -1.84465800 | 0.88722400  | -1.11274300 |
| C | -0.59359400 | -0.43008500 | 0.05568800  |
| H | -0.59808700 | -1.25250600 | -0.67171200 |
| H | -0.61039600 | -0.90175700 | 1.04671800  |
| C | 0.70250600  | 0.37340000  | -0.09897200 |
| H | 0.70501200  | 1.19799700  | 0.62558800  |
| H | 0.72100900  | 0.84217300  | -1.09144200 |
| C | 1.97161500  | -0.46591400 | 0.08690300  |

|   |             |             |             |
|---|-------------|-------------|-------------|
| H | 1.96743200  | -1.29267900 | -0.63550200 |
| H | 1.95410600  | -0.93204700 | 1.08065200  |
| C | 3.26828200  | 0.33560800  | -0.07158800 |
| H | 3.27283900  | 1.16376200  | 0.64932700  |
| H | 3.28787100  | 0.80033800  | -1.06613700 |
| C | 4.53788000  | -0.50234300 | 0.11727200  |
| H | 4.53435200  | -1.32966500 | -0.60305100 |
| H | 4.51900000  | -0.96596300 | 1.11118300  |
| C | 5.82825500  | 0.30661000  | -0.04328300 |
| H | 5.87985000  | 1.11935600  | 0.68829500  |
| H | 6.71353200  | -0.32043300 | 0.09501900  |
| H | 5.89210200  | 0.75578500  | -1.03954100 |
| H | -4.42943500 | 1.89308600  | 1.59004600  |

**H-R28:  $\text{H} + \text{CH}_3(\text{CH}_2)_8\text{CH}_3 \rightarrow \text{H}_2 + \text{CH}_3\text{CH}_2\text{CH}(\text{CH}_2)_6\text{CH}_3$**

**$\text{CH}_3\text{CH}_2\text{CH}(\text{CH}_2)_6\text{CH}_3$**

|   |             |             |             |
|---|-------------|-------------|-------------|
| C | 5.74192400  | 0.48050400  | 0.17446200  |
| H | 6.67886300  | -0.06201200 | 0.32624800  |
| H | 5.61352400  | 1.17222900  | 1.01180900  |
| H | 5.84612700  | 1.07684900  | -0.73701200 |
| C | 4.55258300  | -0.48090800 | 0.06800200  |
| H | 4.49190200  | -1.09899200 | 0.97568700  |
| H | 4.74857800  | -1.20282700 | -0.74576600 |
| C | 3.24230900  | 0.19595200  | -0.16239100 |
| H | 3.24297300  | 1.19549600  | -0.59111700 |
| C | 1.95204500  | -0.55181900 | -0.10181300 |
| H | 1.94937700  | -1.21294300 | 0.77763400  |
| H | 1.87531700  | -1.23805100 | -0.96605600 |
| C | 0.70530700  | 0.34375200  | -0.07559600 |
| H | 0.71601800  | 0.99738700  | -0.95696200 |
| H | 0.75923300  | 1.00626700  | 0.79665300  |
| C | -0.61117100 | -0.43956100 | -0.04170000 |
| H | -0.61965500 | -1.09589900 | 0.83826500  |
| H | -0.66037800 | -1.10301600 | -0.91502600 |
| C | -1.85583600 | 0.45478700  | -0.01603500 |
| H | -1.84675400 | 1.11197500  | -0.89532300 |
| H | -1.80693200 | 1.11741600  | 0.85780500  |
| C | -3.17426000 | -0.32628700 | 0.01637600  |
| H | -3.18461800 | -0.98369500 | 0.89567500  |
| H | -3.22432900 | -0.98908500 | -0.85752900 |
| C | -4.41926500 | 0.56774700  | 0.04189400  |
| H | -4.40921800 | 1.22460400  | -0.83649700 |
| H | -4.37007000 | 1.22918100  | 0.91553400  |

|   |             |             |             |
|---|-------------|-------------|-------------|
| C | -5.73160400 | -0.22116100 | 0.07356500  |
| H | -5.78581900 | -0.86303000 | 0.95867000  |
| H | -6.59873500 | 0.44497100  | 0.09335900  |
| H | -5.82760200 | -0.86486200 | -0.80664300 |

**TS28:  $\text{H} + \text{CH}_3(\text{CH}_2)_8\text{CH}_3 \rightarrow \text{H}_2 + \text{CH}_3\text{CH}_2\text{CH}(\text{CH}_2)_6\text{CH}_3$**

|   |             |             |             |
|---|-------------|-------------|-------------|
| C | 5.72315600  | 0.28669600  | -0.10660200 |
| H | 6.62101300  | -0.32633900 | 0.00765600  |
| H | 5.76416600  | 1.08289100  | 0.64192200  |
| H | 5.76390200  | 0.75620000  | -1.09431200 |
| C | 4.45354500  | -0.55534200 | 0.05193000  |
| H | 4.45450200  | -1.04905200 | 1.03143800  |
| H | 4.45905700  | -1.36745800 | -0.69035900 |
| C | 3.17174700  | 0.23717200  | -0.10598800 |
| H | 3.18437500  | 1.10622500  | 0.88475300  |
| H | 3.18296200  | 0.90197700  | -0.97553300 |
| C | 1.86917600  | -0.52077900 | 0.04743100  |
| H | 1.85417600  | -1.02217800 | 1.02389300  |
| H | 1.83951500  | -1.32761300 | -0.70142300 |
| C | 0.61682700  | 0.35161800  | -0.10246700 |
| H | 0.63676600  | 0.84460300  | -1.08283600 |
| H | 0.64700500  | 1.15452000  | 0.64380100  |
| C | -0.69281700 | -0.43057500 | 0.04472900  |
| H | -0.70849500 | -0.92849300 | 1.02286300  |
| H | -0.72295200 | -1.23250300 | -0.70452300 |
| C | -1.94575200 | 0.44107200  | -0.09742600 |
| H | -1.92966100 | 0.94092800  | -1.07469100 |
| H | -1.91496700 | 1.24165200  | 0.65292100  |
| C | -3.25726600 | -0.33824900 | 0.04937700  |
| H | -3.27309000 | -0.84048300 | 1.02557000  |
| H | -3.29068400 | -1.13743900 | -0.70280200 |
| C | -4.51044100 | 0.53401000  | -0.08775900 |
| H | -4.49571000 | 1.03504200  | -1.06343000 |
| H | -4.47734700 | 1.33242200  | 0.66356900  |
| C | -5.81598000 | -0.25241000 | 0.06190800  |
| H | -5.87664000 | -0.73524600 | 1.04247900  |
| H | -6.68911500 | 0.39784400  | -0.04196200 |
| H | -5.89468900 | -1.03736300 | -0.69713200 |
| H | 3.19274100  | 1.69058900  | 1.65734400  |

**H-R29:  $\text{H} + \text{CH}_3(\text{CH}_2)_8\text{CH}_3 \rightarrow \text{H}_2 + \text{CH}_3(\text{CH}_2)_2\text{CH}(\text{CH}_2)_5\text{CH}_3$**

|   |             |             |            |
|---|-------------|-------------|------------|
| C | -5.79258700 | -0.06974500 | 0.23036100 |
|---|-------------|-------------|------------|

|   |             |             |             |
|---|-------------|-------------|-------------|
| H | -6.59837800 | 0.66452700  | 0.31567800  |
| H | -5.81899800 | -0.69657300 | 1.12745800  |
| H | -6.01784900 | -0.71176800 | -0.62728100 |
| C | -4.43105200 | 0.61131400  | 0.07031600  |
| H | -4.24556500 | 1.27143300  | 0.92506000  |
| H | -4.44538700 | 1.25573500  | -0.81666100 |
| C | -3.26776400 | -0.38291300 | -0.05448000 |
| H | -3.24659300 | -1.03638800 | 0.83076400  |
| H | -3.47855000 | -1.06615700 | -0.89875400 |
| C | -1.93145100 | 0.25553800  | -0.23885500 |
| H | -1.88978400 | 1.25706900  | -0.66085400 |
| C | -0.66611000 | -0.53069000 | -0.14639900 |
| H | -0.59155500 | -1.22407600 | -1.00510000 |
| H | -0.70270100 | -1.18680300 | 0.73615700  |
| C | 0.60647300  | 0.32659300  | -0.09726500 |
| H | 0.55395100  | 0.99534800  | 0.77031400  |
| H | 0.63467000  | 0.97530300  | -0.98189600 |
| C | 1.89752200  | -0.49596900 | -0.03073000 |
| H | 1.94443800  | -1.16702800 | -0.89837800 |
| H | 1.86802900  | -1.14572800 | 0.85370100  |
| C | 3.16804900  | 0.36006500  | 0.01461900  |
| H | 3.12179100  | 1.03180000  | 0.88179500  |
| H | 3.19874100  | 1.00964600  | -0.86999600 |
| C | 4.46175100  | -0.45961100 | 0.08214900  |
| H | 4.50829200  | -1.13160400 | -0.78355600 |
| H | 4.43238000  | -1.10694200 | 0.96717100  |
| C | 5.72504800  | 0.40514600  | 0.12478900  |
| H | 5.72285600  | 1.06549700  | 0.99787200  |
| H | 6.62887300  | -0.20850400 | 0.17537400  |
| H | 5.80205500  | 1.03684000  | -0.76589800 |

**TS29:  $\text{H} + \text{CH}_3(\text{CH}_2)_8\text{CH}_3 \rightarrow \text{H}_2 + \text{CH}_3(\text{CH}_2)_2\text{CH}(\text{CH}_2)_5\text{CH}_3$**

|   |             |             |             |
|---|-------------|-------------|-------------|
| C | -5.75905200 | -0.26264800 | 0.00306600  |
| H | -6.62078500 | 0.40081400  | -0.10971400 |
| H | -5.83926300 | -0.74667500 | 0.98150700  |
| H | -5.83951400 | -1.04402500 | -0.75950700 |
| C | -4.44201600 | 0.50710200  | -0.12707300 |
| H | -4.40419100 | 1.30034800  | 0.62774400  |
| H | -4.40594100 | 1.00951200  | -1.10118900 |
| C | -3.20473300 | -0.38688400 | 0.02234500  |
| H | -3.23645200 | -0.89881000 | 0.99307100  |
| H | -3.24343700 | -1.18485300 | -0.73568300 |
| C | -1.88859000 | 0.35082300  | -0.11333500 |



|   |             |             |             |
|---|-------------|-------------|-------------|
| H | -1.87260000 | 1.21049700  | 0.88466300  |
| H | -1.86017500 | 1.02248800  | -0.97708600 |
| C | -0.62165500 | -0.46392200 | 0.04938700  |
| H | -0.62569400 | -1.27666000 | -0.69356400 |
| H | -0.63254600 | -0.95866400 | 1.02931900  |
| C | 0.66871000  | 0.35057900  | -0.10227500 |
| H | 0.66551200  | 1.16899300  | 0.62767200  |
| H | 0.68082900  | 0.82412700  | -1.09230600 |
| C | 1.94152900  | -0.48412000 | 0.07626700  |
| H | 1.93835300  | -1.31032100 | -0.64689800 |
| H | 1.93070100  | -0.95072400 | 1.06980100  |
| C | 3.23310200  | 0.32451500  | -0.08727500 |
| H | 3.23376000  | 1.15512900  | 0.63066900  |
| H | 3.24826500  | 0.78567500  | -1.08354600 |
| C | 4.50771200  | -0.50548300 | 0.10266700  |
| H | 4.50656100  | -1.33740000 | -0.61239100 |
| H | 4.49446900  | -0.96273900 | 1.09958800  |
| C | 5.79301100  | 0.30961700  | -0.06711700 |
| H | 5.84206600  | 1.12766900  | 0.65866300  |
| H | 6.68210700  | -0.31153700 | 0.07307600  |
| H | 5.85160300  | 0.75215900  | -1.06665000 |
| H | -1.86174000 | 1.78752500  | 1.66281700  |

**H-R30:  $\text{H} + \text{CH}_3(\text{CH}_2)_8\text{CH}_3 \rightarrow \text{H}_2 + \text{CH}_3(\text{CH}_2)_3\text{CH}(\text{CH}_2)_4\text{CH}_3$**   
 **$\text{CH}_3(\text{CH}_2)_3\text{CH}(\text{CH}_2)_4\text{CH}_3$**

|   |             |             |             |
|---|-------------|-------------|-------------|
| C | 5.72910600  | 0.48324200  | 0.16032400  |
| H | 6.65229600  | -0.09238800 | 0.27130300  |
| H | 5.67280700  | 1.18518400  | 0.99837700  |
| H | 5.81379300  | 1.07266400  | -0.75818700 |
| C | 4.50072000  | -0.43031700 | 0.11990700  |
| H | 4.46329700  | -1.03235500 | 1.03611400  |
| H | 4.60323100  | -1.14338300 | -0.70741700 |
| C | 3.18245900  | 0.33525200  | -0.03456100 |
| H | 3.07505000  | 1.04660600  | 0.79350000  |
| H | 3.21886400  | 0.93720500  | -0.95152500 |
| C | 1.94595900  | -0.57259600 | -0.07971200 |
| H | 1.90570800  | -1.18532400 | 0.83383200  |
| H | 2.07425200  | -1.30517700 | -0.89850800 |
| C | 0.65490800  | 0.15674700  | -0.25049900 |
| H | 0.67501800  | 1.15641200  | -0.67802600 |
| C | -0.65996600 | -0.53856500 | -0.12603300 |
| H | -0.65567400 | -1.17993800 | 0.76817200  |
| H | -0.79388100 | -1.24076100 | -0.97025400 |

|   |             |             |             |
|---|-------------|-------------|-------------|
| C | -1.86998500 | 0.40472600  | -0.07585600 |
| H | -1.86489300 | 1.04070200  | -0.97013700 |
| H | -1.76085200 | 1.08109300  | 0.78056400  |
| C | -3.21328000 | -0.32590500 | 0.01805300  |
| H | -3.21761800 | -0.96539100 | 0.91057300  |
| H | -3.31861000 | -1.00308500 | -0.83989300 |
| C | -4.42231900 | 0.61507200  | 0.06773400  |
| H | -4.41695500 | 1.25570200  | -0.82259400 |
| H | -4.31941900 | 1.28926300  | 0.92680500  |
| C | -5.76147100 | -0.12261400 | 0.15686600  |
| H | -5.81000000 | -0.74731700 | 1.05448700  |
| H | -6.60164800 | 0.57649300  | 0.19365400  |
| H | -5.91155300 | -0.77646200 | -0.70818000 |

**TS30:  $\text{H} + \text{CH}_3(\text{CH}_2)_8\text{CH}_3 \rightarrow \text{H}_2 + \text{CH}_3(\text{CH}_2)_3\text{CH}(\text{CH}_2)_4\text{CH}_3$**

|   |             |             |             |
|---|-------------|-------------|-------------|
| C | -5.75705500 | 0.31040700  | -0.08908800 |
| H | -6.65170100 | -0.30533600 | 0.03855100  |
| H | -5.80708400 | 0.76657200  | -1.08291800 |
| H | -5.80264200 | 1.11889300  | 0.64738700  |
| C | -4.47963300 | -0.51777000 | 0.07611500  |
| H | -4.48132000 | -1.33977400 | -0.65038700 |
| H | -4.47539400 | -0.98827300 | 1.06684200  |
| C | -3.19857400 | 0.30582400  | -0.09507800 |
| H | -3.20290400 | 0.78002400  | -1.08503200 |
| H | -3.19350100 | 1.12414100  | 0.63519900  |
| C | -1.91572100 | -0.51895000 | 0.06281500  |
| H | -1.91682600 | -1.33432700 | -0.67730800 |
| H | -1.91184500 | -1.01028500 | 1.04453100  |
| C | -0.64122900 | 0.28398500  | -0.09944500 |
| H | -0.65383300 | 1.14968500  | 0.89350000  |
| H | -0.66058600 | 0.95097400  | -0.96701000 |
| C | 0.66795100  | -0.46458400 | 0.04562700  |
| H | 0.70160400  | -1.26698000 | -0.70775100 |
| H | 0.69031900  | -0.97115200 | 1.01924500  |
| C | 1.91265400  | 0.41883700  | -0.10368800 |
| H | 1.87852300  | 1.21725600  | 0.64720900  |
| H | 1.88523800  | 0.91711500  | -1.08123000 |
| C | 3.22917100  | -0.35299000 | 0.03447600  |
| H | 3.26399000  | -1.15121200 | -0.71875500 |
| H | 3.25398800  | -0.85561300 | 1.01019500  |
| C | 4.47507300  | 0.52863900  | -0.10855900 |
| H | 4.44033300  | 1.32526500  | 0.64442100  |
| H | 4.45102000  | 1.03119700  | -1.08324300 |

|   |             |             |             |
|---|-------------|-------------|-------------|
| C | 5.78687100  | -0.24889700 | 0.03208800  |
| H | 5.86692900  | -1.03175000 | -0.72897100 |
| H | 6.65457400  | 0.40791700  | -0.07546200 |
| H | 5.85660600  | -0.73301800 | 1.01139100  |
| H | -0.66254200 | 1.73167100  | 1.66801400  |

### 2.1.11 C11 (*n*-C<sub>11</sub>H<sub>24</sub>)

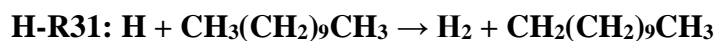

#### *n*-C<sub>11</sub>H<sub>24</sub>

|   |             |             |             |
|---|-------------|-------------|-------------|
| C | 6.40891800  | -0.38215800 | 0.00000500  |
| H | 6.45417800  | -1.02780200 | -0.88287800 |
| H | 6.45419100  | -1.02776600 | 0.88291400  |
| H | 7.30617800  | 0.24317100  | -0.00001500 |
| C | 5.13375500  | 0.46621600  | -0.00000400 |
| H | 5.13411300  | 1.12607000  | 0.87623600  |
| H | 5.13411600  | 1.12605200  | -0.87625800 |
| C | 3.84907600  | -0.37023300 | 0.00000000  |
| H | 3.84955600  | -1.03110800 | 0.87679600  |
| H | 3.84955300  | -1.03111000 | -0.87679500 |
| C | 2.56653900  | 0.46908700  | 0.00000000  |
| H | 2.56692600  | 1.12970500  | -0.87681100 |
| H | 2.56692200  | 1.12969700  | 0.87681800  |
| C | 1.28301900  | -0.36911700 | -0.00000500 |
| H | 1.28285200  | -1.02977300 | 0.87674500  |
| H | 1.28285100  | -1.02975900 | -0.87676600 |
| C | 0.00000000  | 0.46980800  | 0.00000200  |
| H | -0.00000100 | 1.13043300  | -0.87678200 |
| H | 0.00000100  | 1.13042400  | 0.87679200  |
| C | -1.28301900 | -0.36911700 | 0.00000000  |
| H | -1.28285100 | -1.02976800 | 0.87675400  |
| H | -1.28285100 | -1.02976400 | -0.87675700 |
| C | -2.56653900 | 0.46908700  | 0.00000200  |
| H | -2.56692400 | 1.12970200  | -0.87681200 |
| H | -2.56692300 | 1.12970000  | 0.87681700  |
| C | -3.84907600 | -0.37023300 | 0.00000100  |
| H | -3.84955500 | -1.03110900 | 0.87679700  |
| H | -3.84955400 | -1.03111000 | -0.87679400 |
| C | -5.13375500 | 0.46621600  | 0.00000000  |
| H | -5.13411400 | 1.12606100  | -0.87624700 |
| H | -5.13411500 | 1.12606200  | 0.87624700  |
| C | -6.40891800 | -0.38215800 | -0.00000100 |
| H | -6.45418600 | -1.02778300 | 0.88289600  |
| H | -7.30617800 | 0.24317100  | -0.00000300 |

|   |             |             |             |
|---|-------------|-------------|-------------|
| H | -6.45418400 | -1.02778500 | -0.88289600 |
|---|-------------|-------------|-------------|

**CH<sub>2</sub>(CH<sub>2</sub>)<sub>9</sub>CH<sub>3</sub>**

|   |             |             |             |
|---|-------------|-------------|-------------|
| C | -6.45896300 | -0.36859000 | 0.00227300  |
| H | -6.47743800 | -1.36382800 | -0.42776400 |
| H | -7.40242400 | 0.06187600  | 0.31578400  |
| C | -5.20843900 | 0.44012600  | -0.00218900 |
| H | -5.18484000 | 1.08584500  | -0.89899100 |
| H | -5.21435700 | 1.13926700  | 0.84465400  |
| C | -3.92048500 | -0.39739000 | 0.02526500  |
| H | -3.92592000 | -1.08789700 | -0.82759500 |
| H | -3.92028200 | -1.02334500 | 0.92556400  |
| C | -2.64255100 | 0.44715400  | -0.01143000 |
| H | -2.64208800 | 1.13951000  | 0.84049200  |
| H | -2.64852700 | 1.07479000  | -0.91215000 |
| C | -1.35628100 | -0.38623000 | 0.01537800  |
| H | -1.35464300 | -1.07599500 | -0.83855000 |
| H | -1.35271500 | -1.01661700 | 0.91400000  |
| C | -0.07677000 | 0.45754900  | -0.01438700 |
| H | -0.07835900 | 1.14641900  | 0.84030900  |
| H | -0.08062000 | 1.08903400  | -0.91234500 |
| C | 1.20964500  | -0.37574000 | 0.01140200  |
| H | 1.21205600  | -1.06346800 | -0.84420600 |
| H | 1.21247000  | -1.00850700 | 0.90844400  |
| C | 2.48944500  | 0.46771000  | -0.01533100 |
| H | 2.48694400  | 1.15550900  | 0.84026700  |
| H | 2.48684400  | 1.10041700  | -0.91247200 |
| C | 3.77571100  | -0.36544700 | 0.01090800  |
| H | 3.77901100  | -1.05384800 | -0.84438500 |
| H | 3.77945100  | -0.99802600 | 0.90830000  |
| C | 5.05646400  | 0.47660100  | -0.01639200 |
| H | 5.05368100  | 1.16463400  | 0.83783800  |
| H | 5.05375100  | 1.10746700  | -0.91371400 |
| C | 6.33559900  | -0.36521900 | 0.01130700  |
| H | 6.38337600  | -1.04016500 | -0.84920100 |
| H | 7.22979100  | 0.26404500  | -0.01065000 |
| H | 6.38459100  | -0.98025900 | 0.91554700  |

**TS31: H + CH<sub>3</sub>(CH<sub>2</sub>)<sub>9</sub>CH<sub>3</sub> → H<sub>2</sub> + CH<sub>2</sub>(CH<sub>2</sub>)<sub>9</sub>CH<sub>3</sub>**

|   |            |            |             |
|---|------------|------------|-------------|
| C | 6.32815500 | 0.27239900 | -0.15908100 |
| H | 6.39708300 | 1.17320300 | 0.86586000  |
| H | 6.35737600 | 0.92341300 | -1.03351400 |

|   |             |             |             |
|---|-------------|-------------|-------------|
| H | 7.25800900  | -0.27863800 | -0.02093100 |
| C | 5.05682500  | -0.51914400 | 0.03004800  |
| H | 5.03747000  | -1.34108100 | -0.70221900 |
| H | 5.06875100  | -1.00294400 | 1.01460700  |
| C | 3.77893300  | 0.31596200  | -0.11970400 |
| H | 3.77900800  | 0.79785700  | -1.10585000 |
| H | 3.79342900  | 1.12839000  | 0.61686700  |
| C | 2.49291000  | -0.50055100 | 0.04585300  |
| H | 2.49959500  | -0.99126800 | 1.02774100  |
| H | 2.47891400  | -1.30874800 | -0.69715200 |
| C | 1.21499100  | 0.33468300  | -0.09174100 |
| H | 1.21471900  | 0.83751600  | -1.06756200 |
| H | 1.22364400  | 1.13374100  | 0.66079500  |
| C | -0.07301400 | -0.48351300 | 0.05419300  |
| H | -0.06767200 | -0.99713100 | 1.02437800  |
| H | -0.08681500 | -1.27427400 | -0.70720400 |
| C | -1.35055500 | 0.35519400  | -0.06540000 |
| H | -1.35030900 | 0.87943900  | -1.02991600 |
| H | -1.34182000 | 1.13761100  | 0.70452800  |
| C | -2.63938500 | -0.46482000 | 0.06256200  |
| H | -2.63535100 | -0.99783100 | 1.02228600  |
| H | -2.65287100 | -1.24015800 | -0.71453100 |
| C | -3.91642900 | 0.37638800  | -0.04162500 |
| H | -3.91885200 | 0.91512200  | -0.99832100 |
| H | -3.90644300 | 1.14753300  | 0.73983100  |
| C | -5.20638500 | -0.44325400 | 0.07739000  |
| H | -5.20245100 | -0.98485600 | 1.03125100  |
| H | -5.21986300 | -1.21019200 | -0.70667900 |
| C | -6.47622200 | 0.40735500  | -0.02052400 |
| H | -6.52597800 | 0.93499100  | -0.97838300 |
| H | -7.37709700 | -0.20648400 | 0.06705500  |
| H | -6.50966800 | 1.16087800  | 0.77282300  |
| H | 6.42825200  | 1.75971800  | 1.58241100  |

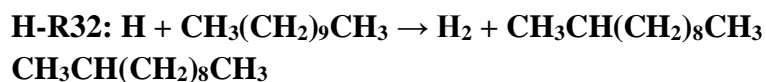

|   |             |             |             |
|---|-------------|-------------|-------------|
| C | -6.49200900 | -0.24744000 | -0.13929900 |
| H | -6.80209500 | -0.81060600 | 0.75769600  |
| H | -6.47273300 | -0.97439200 | -0.96098200 |
| H | -7.28210200 | 0.47850800  | -0.34731100 |
| C | -5.16593000 | 0.40801000  | 0.04422100  |
| H | -5.13336300 | 1.44339900  | 0.37089500  |
| C | -3.90369600 | -0.38787100 | 0.07282800  |

|   |             |             |             |
|---|-------------|-------------|-------------|
| H | -3.90826300 | -1.11320700 | -0.75487500 |
| H | -3.87303800 | -1.01034900 | 0.98689800  |
| C | -2.62290800 | 0.45575100  | 0.01013600  |
| H | -2.62282400 | 1.16825100  | 0.84466800  |
| H | -2.63611300 | 1.05817500  | -0.90619800 |
| C | -1.33808600 | -0.37796300 | 0.05460800  |
| H | -1.34045200 | -1.09065800 | -0.78039700 |
| H | -1.33053200 | -0.98383900 | 0.97011200  |
| C | -0.05815600 | 0.46349900  | -0.00461000 |
| H | -0.05328200 | 1.17337000  | 0.83269900  |
| H | -0.06767500 | 1.07235800  | -0.91796700 |
| C | 1.22757400  | -0.37044000 | 0.03279400  |
| H | 1.22279400  | -1.07930600 | -0.80538300 |
| H | 1.23645900  | -0.98056800 | 0.94538200  |
| C | 2.50818000  | 0.47023500  | -0.02487900 |
| H | 2.51369900  | 1.17854900  | 0.81379100  |
| H | 2.49893100  | 1.08095300  | -0.93709300 |
| C | 3.79347200  | -0.36408600 | 0.01078700  |
| H | 3.78810300  | -1.07357600 | -0.82709000 |
| H | 3.80435600  | -0.97406700 | 0.92365400  |
| C | 5.07521100  | 0.47476900  | -0.04921500 |
| H | 5.08132900  | 1.18407700  | 0.78740700  |
| H | 5.06529900  | 1.08280400  | -0.96212400 |
| C | 6.35326900  | -0.36832900 | -0.01193200 |
| H | 6.39158600  | -1.06562700 | -0.85492400 |
| H | 7.24817900  | 0.25854100  | -0.05907800 |
| H | 6.41019900  | -0.95959900 | 0.90758200  |

**TS32:  $\text{H} + \text{CH}_3(\text{CH}_2)_9\text{CH}_3 \rightarrow \text{H}_2 + \text{CH}_3\text{CH}(\text{CH}_2)_8\text{CH}_3$**

|   |             |             |             |
|---|-------------|-------------|-------------|
| C | -6.36520400 | -0.40027900 | 0.00999600  |
| H | -6.40576400 | -0.90745800 | 0.97885900  |
| H | -6.47206200 | -1.16827400 | -0.76666500 |
| H | -7.23169900 | 0.26237600  | -0.06098700 |
| C | -5.06803700 | 0.35981200  | -0.15821500 |
| H | -5.05141800 | 0.99213700  | -1.05034000 |
| H | -5.07445600 | 1.26721700  | 0.79251700  |
| C | -3.78656800 | -0.42403300 | 0.03708600  |
| H | -3.77070200 | -1.25738900 | -0.68300000 |
| H | -3.79659200 | -0.89181600 | 1.03024700  |
| C | -2.51038000 | 0.40966500  | -0.12788200 |
| H | -2.52168100 | 1.23129100  | 0.59836600  |
| H | -2.51250100 | 0.87894000  | -1.12000700 |
| C | -1.22317800 | -0.40421800 | 0.04373800  |

|   |             |             |             |
|---|-------------|-------------|-------------|
| H | -1.20698400 | -1.21642900 | -0.69484300 |
| H | -1.23017500 | -0.88964200 | 1.02823000  |
| C | 0.05353900  | 0.43244500  | -0.09632800 |
| H | 0.04523000  | 1.23116200  | 0.65656300  |
| H | 0.05144500  | 0.93575700  | -1.07191700 |
| C | 1.34288000  | -0.38416900 | 0.04662100  |
| H | 1.35924900  | -1.17020300 | -0.71959000 |
| H | 1.33728200  | -0.90371700 | 1.01363400  |
| C | 2.61903400  | 0.45770700  | -0.06601600 |
| H | 2.60990800  | 1.23230600  | 0.71178300  |
| H | 2.61690900  | 0.99161500  | -1.02525300 |
| C | 3.90920500  | -0.36127700 | 0.05203400  |
| H | 3.92403600  | -1.12846300 | -0.73327100 |
| H | 3.90816200  | -0.90470600 | 1.00606400  |
| C | 5.18563700  | 0.48219500  | -0.04496600 |
| H | 5.17507300  | 1.24356000  | 0.74448900  |
| H | 5.18396500  | 1.03042900  | -0.99504200 |
| C | 6.46931400  | -0.34603000 | 0.06335600  |
| H | 6.52670900  | -1.09300300 | -0.73484900 |
| H | 7.35993500  | 0.28462100  | -0.00813900 |
| H | 6.51637200  | -0.87974100 | 1.01797300  |
| H | -5.09770300 | 1.89851800  | 1.52863500  |

**H-R33:  $\text{H} + \text{CH}_3(\text{CH}_2)_9\text{CH}_3 \rightarrow \text{H}_2 + \text{CH}_3\text{CH}_2\text{CH}(\text{CH}_2)_7\text{CH}_3$**   
 **$\text{CH}_3\text{CH}_2\text{CH}(\text{CH}_2)_7\text{CH}_3$**

|   |            |             |             |
|---|------------|-------------|-------------|
| C | 6.36693400 | -0.59181300 | 0.18093600  |
| H | 6.46241900 | -1.16536300 | -0.74600600 |
| H | 6.21083700 | -1.30260400 | 0.99735100  |
| H | 7.31764400 | -0.08114400 | 0.35582500  |
| C | 5.20671700 | 0.40622800  | 0.09137000  |
| H | 5.15568800 | 1.00087800  | 1.01513500  |
| H | 5.43070800 | 1.14394100  | -0.70071000 |
| C | 3.87961200 | -0.22597000 | -0.16776200 |
| H | 3.85551000 | -1.21251000 | -0.62504200 |
| C | 2.61047100 | 0.55602300  | -0.09513500 |
| H | 2.55501100 | 1.26143700  | -0.94544000 |
| H | 2.62352900 | 1.19880700  | 0.79764800  |
| C | 1.33922100 | -0.30495700 | -0.09022100 |
| H | 1.37202500 | -0.98606400 | 0.76862400  |
| H | 1.33464100 | -0.94086600 | -0.98454000 |
| C | 0.04492100 | 0.51389000  | -0.04389900 |
| H | 0.01666800 | 1.19569200  | -0.90390100 |
| H | 0.05209400 | 1.15256000  | 0.84901000  |

|   |             |             |             |
|---|-------------|-------------|-------------|
| C | -1.22414400 | -0.34585300 | -0.03898900 |
| H | -1.19549600 | -1.02770100 | 0.82078500  |
| H | -1.23136200 | -0.98448700 | -0.93183700 |
| C | -2.52054600 | 0.47098100  | 0.00783600  |
| H | -2.54886800 | 1.15376800  | -0.85132700 |
| H | -2.51403100 | 1.10866200  | 0.90142400  |
| C | -3.78911400 | -0.38924800 | 0.01089900  |
| H | -3.76099800 | -1.07326700 | 0.86925900  |
| H | -3.79705200 | -1.02625400 | -0.88332700 |
| C | -5.08677700 | 0.42550100  | 0.05979700  |
| H | -5.11551400 | 1.10936200  | -0.79733300 |
| H | -5.07991300 | 1.06056800  | 0.95413200  |
| C | -6.34784400 | -0.44357900 | 0.06116000  |
| H | -6.36371900 | -1.11574700 | 0.92502600  |
| H | -7.25473800 | 0.16647300  | 0.09885200  |
| H | -6.40179000 | -1.06335700 | -0.83955200 |

**TS33:  $\text{H} + \text{CH}_3(\text{CH}_2)_9\text{CH}_3 \rightarrow \text{H}_2 + \text{CH}_3\text{CH}_2\text{CH}(\text{CH}_2)_7\text{CH}_3$**

|   |             |             |             |
|---|-------------|-------------|-------------|
| C | -6.35172600 | 0.37513300  | -0.13126600 |
| H | -6.37569400 | 0.82322000  | -1.12942600 |
| H | -6.37941900 | 1.18858000  | 0.59912400  |
| H | -7.26398700 | -0.21476200 | -0.00944900 |
| C | -5.10269300 | -0.49169000 | 0.05432400  |
| H | -5.12126500 | -0.96375000 | 1.04428300  |
| H | -5.12197200 | -1.31962400 | -0.67007800 |
| C | -3.80203500 | 0.26781500  | -0.11159500 |
| H | -3.79763000 | 1.15310200  | 0.86509000  |
| H | -3.79472700 | 0.91884800  | -0.99154100 |
| C | -2.51875200 | -0.51913100 | 0.05706500  |
| H | -2.50347300 | -1.33148900 | -0.68633300 |
| H | -2.52257400 | -1.01427000 | 1.03679200  |
| C | -1.24444100 | 0.32139600  | -0.08940000 |
| H | -1.25249100 | 1.11979900  | 0.66222900  |
| H | -1.25265600 | 0.82129600  | -1.06641100 |
| C | 0.04428400  | -0.49634700 | 0.04960400  |
| H | 0.05725700  | -1.28453800 | -0.71457200 |
| H | 0.04256100  | -1.01289700 | 1.01816900  |
| C | 1.31993700  | 0.34513000  | -0.07007200 |
| H | 1.31333400  | 1.12170900  | 0.70558300  |
| H | 1.31480100  | 0.87627400  | -1.03077100 |
| C | 2.61008100  | -0.47457300 | 0.04623800  |
| H | 2.62322400  | -1.24102700 | -0.73962100 |
| H | 2.60856900  | -1.01830600 | 0.99992100  |



|   |             |             |             |
|---|-------------|-------------|-------------|
| C | 3.88571300  | 0.36965900  | -0.05049300 |
| H | 3.87691300  | 1.13017400  | 0.74126000  |
| H | 3.88484100  | 0.92112600  | -0.99990200 |
| C | 5.17692000  | -0.45004500 | 0.05398300  |
| H | 5.18985600  | -1.20522300 | -0.74141800 |
| H | 5.17542600  | -1.00570100 | 0.99973100  |
| C | 6.44542200  | 0.40368800  | -0.03353700 |
| H | 6.47928400  | 1.14511400  | 0.77108400  |
| H | 7.34727700  | -0.21017500 | 0.04304200  |
| H | 6.49260500  | 0.94584100  | -0.98337900 |
| H | -3.79631500 | 1.75046600  | 1.62749000  |

**H-R34:  $\text{H} + \text{CH}_3(\text{CH}_2)_9\text{CH}_3 \rightarrow \text{H}_2 + \text{CH}_3(\text{CH}_2)_2\text{CH}(\text{CH}_2)_6\text{CH}_3$**   
 **$\text{CH}_3(\text{CH}_2)_2\text{CH}(\text{CH}_2)_6\text{CH}_3$**

|   |             |             |             |
|---|-------------|-------------|-------------|
| C | 6.43518600  | -0.14824000 | 0.25276700  |
| H | 6.65681000  | -0.75892400 | -0.62838800 |
| H | 6.44219100  | -0.81141500 | 1.12373500  |
| H | 7.25305700  | 0.56725500  | 0.37472000  |
| C | 5.08734900  | 0.56311000  | 0.10931500  |
| H | 4.90696400  | 1.19313100  | 0.98753400  |
| H | 5.12001200  | 1.24067400  | -0.75207700 |
| C | 3.90759300  | -0.40459600 | -0.06177600 |
| H | 3.86735000  | -1.08999400 | 0.79823600  |
| H | 4.11341800  | -1.05940900 | -0.92949200 |
| C | 2.58445200  | 0.26435700  | -0.23251100 |
| H | 2.56381100  | 1.27913800  | -0.62326700 |
| C | 1.30412800  | -0.50037800 | -0.17068600 |
| H | 1.32210500  | -1.18107600 | 0.69363300  |
| H | 1.22328500  | -1.16841800 | -1.04869900 |
| C | 0.04726000  | 0.37877500  | -0.10659100 |
| H | 0.03655900  | 1.05081500  | -0.97400500 |
| H | 0.10653900  | 1.02348700  | 0.77860300  |
| C | -1.25905300 | -0.42117800 | -0.06930900 |
| H | -1.24684100 | -1.09472700 | 0.79750200  |
| H | -1.31302300 | -1.06789200 | -0.95483900 |
| C | -2.51396500 | 0.45701200  | -0.00808800 |
| H | -2.52570700 | 1.13111200  | -0.87443900 |
| H | -2.46025200 | 1.10317700  | 0.87773400  |
| C | -3.82217500 | -0.34084500 | 0.02812800  |
| H | -3.81181000 | -1.01491500 | 0.89471500  |
| H | -3.87678800 | -0.98748500 | -0.85754400 |
| C | -5.07762600 | 0.53677300  | 0.08861800  |
| H | -5.08837000 | 1.21046100  | -0.77691200 |

|   |             |             |             |
|---|-------------|-------------|-------------|
| H | -5.02403500 | 1.18185400  | 0.97416100  |
| C | -6.37946000 | -0.26920300 | 0.12363400  |
| H | -6.41214800 | -0.92963300 | 0.99605800  |
| H | -7.25442100 | 0.38526100  | 0.17012300  |
| H | -6.48083300 | -0.89600800 | -0.76809100 |

**TS34: H + CH<sub>3</sub>(CH<sub>2</sub>)<sub>9</sub>CH<sub>3</sub> → H<sub>2</sub> + CH<sub>3</sub>(CH<sub>2</sub>)<sub>2</sub>CH(CH<sub>2</sub>)<sub>6</sub>CH<sub>3</sub>**

|   |             |             |             |
|---|-------------|-------------|-------------|
| C | -6.38918900 | -0.34259300 | 0.02529100  |
| H | -6.45097200 | -0.84585100 | 0.99532900  |
| H | -6.46044000 | -1.11143600 | -0.75080300 |
| H | -7.26519200 | 0.30502100  | -0.06805600 |
| C | -5.08927400 | 0.45626600  | -0.10164100 |
| H | -5.07219700 | 0.97763000  | -1.06626400 |
| H | -5.06083900 | 1.23567100  | 0.66785800  |
| C | -3.83276900 | -0.41482200 | 0.01995800  |
| H | -3.86072000 | -1.19735100 | -0.75443800 |
| H | -3.84649700 | -0.94754200 | 0.97986100  |
| C | -2.53325500 | 0.35291800  | -0.10932100 |
| H | -2.52628600 | 1.18850400  | 0.90935500  |
| H | -2.52625600 | 1.04569800  | -0.95664500 |
| C | -1.24821600 | -0.43870800 | 0.02296800  |
| H | -1.23851100 | -1.22860500 | -0.74412300 |
| H | -1.24305300 | -0.96260800 | 0.98765700  |
| C | 0.02331300  | 0.40823700  | -0.10998500 |
| H | 0.00611600  | 1.20323100  | 0.64513500  |
| H | 0.01947100  | 0.91243500  | -1.08484200 |
| C | 1.31522100  | -0.40307500 | 0.03636900  |
| H | 1.32770000  | -1.20498800 | -0.71341200 |
| H | 1.31936400  | -0.90186800 | 1.01416100  |
| C | 2.58728400  | 0.44044300  | -0.10526300 |
| H | 2.56892800  | 1.24855900  | 0.63742100  |
| H | 2.58800200  | 0.93133500  | -1.08718900 |
| C | 3.88100300  | -0.36492700 | 0.05783000  |
| H | 3.89868400  | -1.17718000 | -0.68081500 |
| H | 3.88317300  | -0.85103100 | 1.04226800  |
| C | 5.15342500  | 0.47702400  | -0.09030800 |
| H | 5.13403600  | 1.29162100  | 0.64399800  |
| H | 5.15451900  | 0.95773300  | -1.07625200 |
| C | 6.44093800  | -0.33383400 | 0.08305900  |
| H | 6.50673600  | -1.13629400 | -0.65871000 |
| H | 7.32834000  | 0.29528700  | -0.02972900 |
| H | 6.48624700  | -0.79682200 | 1.07397800  |
| H | -2.52122400 | 1.74727900  | 1.70051400  |

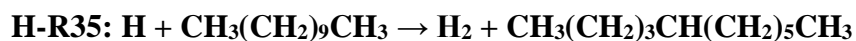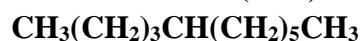

|   |             |             |             |
|---|-------------|-------------|-------------|
| C | 6.34317300  | -0.62897100 | 0.18435700  |
| H | 6.42894000  | -1.15472100 | -0.77194900 |
| H | 6.24117300  | -1.38594000 | 0.96848000  |
| H | 7.28357300  | -0.09789700 | 0.35627500  |
| C | 5.14979200  | 0.33071700  | 0.18306400  |
| H | 5.11193900  | 0.86708500  | 1.13918600  |
| H | 5.29758200  | 1.09636600  | -0.58848400 |
| C | 3.80887500  | -0.37185400 | -0.05401500 |
| H | 3.65686200  | -1.13681400 | 0.71727200  |
| H | 3.84472000  | -0.90667500 | -1.01172700 |
| C | 2.60747800  | 0.58331400  | -0.05756700 |
| H | 2.78268000  | 1.36836500  | -0.81703400 |
| H | 2.56758400  | 1.12805600  | 0.89785400  |
| C | 1.29487700  | -0.08133700 | -0.30866700 |
| H | 1.28738500  | -1.03555900 | -0.83035200 |
| C | 0.00210600  | 0.64351300  | -0.13221700 |
| H | -0.10967700 | 1.41057000  | -0.92142500 |
| H | 0.02511000  | 1.21508000  | 0.80767900  |
| C | -1.23673200 | -0.26310000 | -0.15187500 |
| H | -1.14720700 | -1.00781500 | 0.64818200  |
| H | -1.25286600 | -0.82652500 | -1.09340600 |
| C | -2.55621800 | 0.49981700  | 0.00535000  |
| H | -2.64280200 | 1.24353900  | -0.79760500 |
| H | -2.53583700 | 1.06858900  | 0.94416500  |
| C | -3.79330400 | -0.40488400 | -0.00886600 |
| H | -3.70740800 | -1.14847300 | 0.79429000  |
| H | -3.81528500 | -0.97433000 | -0.94730800 |
| C | -5.11473600 | 0.35595400  | 0.14915000  |
| H | -5.20232300 | 1.09733100  | -0.65455000 |
| H | -5.09241100 | 0.92594600  | 1.08606100  |
| C | -6.34456100 | -0.55666000 | 0.13692700  |
| H | -6.30332400 | -1.28657700 | 0.95165100  |
| H | -7.26922200 | 0.01602600  | 0.25119800  |
| H | -6.41368400 | -1.11468400 | -0.80229800 |

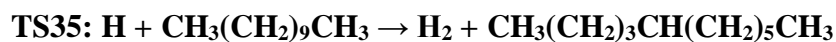

|   |             |             |             |
|---|-------------|-------------|-------------|
| C | -6.38068900 | 0.41110600  | -0.09588200 |
| H | -6.41741500 | 0.87171200  | -1.08825200 |
| H | -6.40593300 | 1.21799600  | 0.64328200  |
| H | -7.29139300 | -0.18131700 | 0.02859100  |
| C | -5.12571000 | -0.45098400 | 0.06813000  |

|   |             |             |             |
|---|-------------|-------------|-------------|
| H | -5.13543100 | -0.92495600 | 1.05716100  |
| H | -5.14792000 | -1.27005000 | -0.66134500 |
| C | -3.82319900 | 0.33930600  | -0.09800300 |
| H | -3.79690900 | 1.15333700  | 0.63657500  |
| H | -3.81414100 | 0.81857500  | -1.08548800 |
| C | -2.56275300 | -0.52007200 | 0.05630400  |
| H | -2.58325700 | -1.32907500 | -0.69046300 |
| H | -2.57449000 | -1.01932400 | 1.03397100  |
| C | -1.26728600 | 0.25074200  | -0.09555700 |
| H | -1.25894600 | 1.10518700  | 0.90752800  |
| H | -1.26784800 | 0.92810800  | -0.95524300 |
| C | 0.02137100  | -0.53393000 | 0.04203600  |
| H | 0.03845500  | -1.32195300 | -0.72695900 |
| H | 0.02492000  | -1.05995900 | 1.00552100  |
| C | 1.28960900  | 0.31929100  | -0.08274700 |
| H | 1.27511500  | 1.09859800  | 0.68850100  |
| H | 1.27818700  | 0.84323300  | -1.04705200 |
| C | 2.58454700  | -0.49158500 | 0.03775800  |
| H | 2.60247200  | -1.26452600 | -0.74172800 |
| H | 2.58812200  | -1.02687200 | 0.99611600  |
| C | 3.85346900  | 0.36164300  | -0.06729500 |
| H | 3.83767200  | 1.13049400  | 0.71611000  |
| H | 3.84907000  | 0.90263000  | -1.02268200 |
| C | 5.15081300  | -0.44685600 | 0.04733700  |
| H | 5.17052200  | -1.21093700 | -0.73939900 |
| H | 5.15283900  | -0.99157500 | 0.99940200  |
| C | 6.41254600  | 0.41591100  | -0.04878200 |
| H | 6.43977400  | 1.16656400  | 0.74744900  |
| H | 7.31907500  | -0.18996600 | 0.03552200  |
| H | 6.45638500  | 0.94762700  | -1.00465800 |
| H | -1.25524000 | 1.67901900  | 1.68774900  |

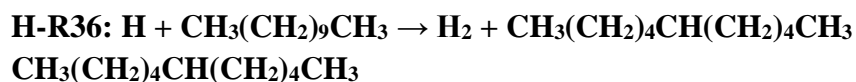

|   |            |             |             |
|---|------------|-------------|-------------|
| C | 6.41107800 | -0.18732500 | 0.16022300  |
| H | 6.54848900 | -0.82340700 | -0.72004400 |
| H | 6.45017800 | -0.83345200 | 1.04302000  |
| H | 7.26322300 | 0.49620300  | 0.21154300  |
| C | 5.08461400 | 0.57504000  | 0.09087800  |
| H | 4.99489600 | 1.23121500  | 0.96522600  |
| H | 5.08848200 | 1.23560500  | -0.78475200 |
| C | 3.85957800 | -0.34384800 | 0.02257900  |
| H | 3.85445000 | -1.00330800 | 0.90042400  |

|   |             |             |             |
|---|-------------|-------------|-------------|
| H | 3.95197600  | -1.00309200 | -0.85069200 |
| C | 2.52882500  | 0.41150400  | -0.05234900 |
| H | 2.53456300  | 1.06939000  | -0.93060500 |
| H | 2.43142500  | 1.06816600  | 0.82070300  |
| C | 1.30298300  | -0.50920300 | -0.12573500 |
| H | 1.28832300  | -1.17349700 | 0.75184100  |
| H | 1.42383300  | -1.19212900 | -0.98737600 |
| C | 0.00000000  | 0.21120000  | -0.23150700 |
| H | 0.00000000  | 1.23539400  | -0.59668400 |
| C | -1.30298300 | -0.50920300 | -0.12573300 |
| H | -1.28832300 | -1.17349400 | 0.75184500  |
| H | -1.42383200 | -1.19213100 | -0.98737200 |
| C | -2.52882500 | 0.41150400  | -0.05235100 |
| H | -2.53456300 | 1.06938800  | -0.93060900 |
| H | -2.43142500 | 1.06816900  | 0.82069900  |
| C | -3.85957800 | -0.34384800 | 0.02257900  |
| H | -3.85445000 | -1.00330600 | 0.90042700  |
| H | -3.95197600 | -1.00309400 | -0.85068900 |
| C | -5.08461400 | 0.57504000  | 0.09087600  |
| H | -5.08848300 | 1.23560200  | -0.78475700 |
| H | -4.99489600 | 1.23121900  | 0.96522100  |
| C | -6.41107800 | -0.18732500 | 0.16022500  |
| H | -6.45017700 | -0.83344900 | 1.04302400  |
| H | -7.26322300 | 0.49620200  | 0.21154300  |
| H | -6.54848900 | -0.82341000 | -0.72004000 |

**TS36:  $\text{H} + \text{CH}_3(\text{CH}_2)_9\text{CH}_3 \rightarrow \text{H}_2 + \text{CH}_3(\text{CH}_2)_4\text{CH}(\text{CH}_2)_4\text{CH}_3$**

|   |             |             |             |
|---|-------------|-------------|-------------|
| C | -6.41451400 | -0.32769600 | 0.06247000  |
| H | -6.46764300 | -0.77535900 | 1.05998700  |
| H | -6.48308300 | -1.14057200 | -0.66761600 |
| H | -7.29656000 | 0.30632300  | -0.06365900 |
| C | -5.12043800 | 0.47120000  | -0.11701600 |
| H | -5.11368100 | 0.93747200  | -1.10983400 |
| H | -5.09783900 | 1.29605400  | 0.60551700  |
| C | -3.85519900 | -0.37812200 | 0.04893100  |
| H | -3.87465100 | -1.19970700 | -0.67940200 |
| H | -3.86620000 | -0.85109300 | 1.03959200  |
| C | -2.55606300 | 0.41738300  | -0.11646200 |
| H | -2.53171300 | 1.23017000  | 0.61936900  |
| H | -2.54762500 | 0.89796300  | -1.10317200 |
| C | -1.29225900 | -0.43763000 | 0.03668300  |
| H | -1.30706700 | -1.24270700 | -0.71437800 |
| H | -1.30420500 | -0.94207800 | 1.01164700  |

|   |             |             |             |
|---|-------------|-------------|-------------|
| C | -0.00017200 | 0.34030000  | -0.10763100 |
| H | 0.00194100  | 1.18776700  | 0.90101400  |
| H | -0.00234900 | 1.02324600  | -0.96290500 |
| C | 1.29227300  | -0.43858200 | 0.02746200  |
| H | 1.31445200  | -1.22250500 | -0.74553300 |
| H | 1.29749800  | -0.96948100 | 0.98825500  |
| C | 2.55604300  | 0.42211600  | -0.09173800 |
| H | 2.53548900  | 1.19900600  | 0.68184100  |
| H | 2.54363000  | 0.94889000  | -1.05452800 |
| C | 3.85528700  | -0.38134800 | 0.02897800  |
| H | 3.87770200  | -1.15575600 | -0.74913600 |
| H | 3.86372200  | -0.91510200 | 0.98830500  |
| C | 5.12026300  | 0.47778500  | -0.07939500 |
| H | 5.09918700  | 1.24898600  | 0.70005700  |
| H | 5.11130300  | 1.01339300  | -1.03657700 |
| C | 6.41458700  | -0.33202300 | 0.03978900  |
| H | 6.48170700  | -1.08962200 | -0.74759100 |
| H | 7.29655100  | 0.30942600  | -0.04135600 |
| H | 6.46922600  | -0.85100800 | 1.00205100  |
| H | 0.00136700  | 1.75598700  | 1.68562300  |

### 2.1.12 C12 (*n*-C<sub>12</sub>H<sub>26</sub>)

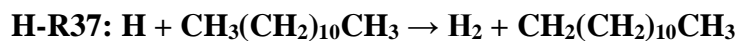

*n*-C<sub>12</sub>H<sub>26</sub>

|   |             |             |             |
|---|-------------|-------------|-------------|
| C | -7.05725600 | 0.30807300  | -0.00000700 |
| H | -7.11424600 | 0.95278200  | -0.88290500 |
| H | -7.11426400 | 0.95275200  | 0.88291000  |
| H | -7.94303000 | -0.33343800 | -0.00002700 |
| C | -5.76696100 | -0.51712000 | -0.00000900 |
| H | -5.75549700 | -1.17688000 | 0.87623400  |
| H | -5.75549300 | -1.17686500 | -0.87626100 |
| C | -4.49748800 | 0.34222000  | -0.00000200 |
| H | -4.50973000 | 1.00298200  | 0.87680400  |
| H | -4.50972200 | 1.00298300  | -0.87680700 |
| C | -3.20024300 | -0.47419500 | 0.00000300  |
| H | -3.18902200 | -1.13474400 | -0.87679900 |
| H | -3.18902400 | -1.13473600 | 0.87681200  |
| C | -1.93160900 | 0.38635000  | 0.00000100  |
| H | -1.94288800 | 1.04690600  | 0.87676500  |
| H | -1.94288300 | 1.04689300  | -0.87677100 |
| C | -0.63428400 | -0.43029200 | 0.00001100  |
| H | -0.62301100 | -1.09085200 | -0.87676100 |
| H | -0.62301600 | -1.09084300 | 0.87678900  |

|   |            |             |             |
|---|------------|-------------|-------------|
| C | 0.63428400 | 0.43029200  | 0.00001000  |
| H | 0.62301400 | 1.09084900  | 0.87678400  |
| H | 0.62301400 | 1.09084700  | -0.87676600 |
| C | 1.93160900 | -0.38634900 | 0.00001000  |
| H | 1.94288400 | -1.04690100 | -0.87675800 |
| H | 1.94288600 | -1.04689800 | 0.87677800  |
| C | 3.20024300 | 0.47419500  | 0.00000600  |
| H | 3.18902600 | 1.13473900  | 0.87681300  |
| H | 3.18902000 | 1.13474100  | -0.87679800 |
| C | 4.49748800 | -0.34222000 | 0.00000000  |
| H | 4.50972200 | -1.00298300 | -0.87680600 |
| H | 4.50973000 | -1.00298300 | 0.87680600  |
| C | 5.76696100 | 0.51712000  | -0.00000600 |
| H | 5.75549900 | 1.17687300  | 0.87624100  |
| H | 5.75549000 | 1.17687300  | -0.87625400 |
| C | 7.05725600 | -0.30807300 | -0.00001300 |
| H | 7.11425000 | -0.95276700 | -0.88292100 |
| H | 7.94303000 | 0.33343800  | -0.00001800 |
| H | 7.11426000 | -0.95276700 | 0.88289400  |

**CH<sub>2</sub>(CH<sub>2</sub>)<sub>10</sub>CH<sub>3</sub>**

|   |             |             |             |
|---|-------------|-------------|-------------|
| C | -7.10711300 | 0.29134300  | 0.00036200  |
| H | -7.14352600 | 1.28426000  | 0.43462400  |
| H | -8.04271400 | -0.15463100 | -0.31503800 |
| C | -5.84225500 | -0.49481800 | 0.00201000  |
| H | -5.80668400 | -1.14236300 | 0.89709800  |
| H | -5.83598800 | -1.19161000 | -0.84672700 |
| C | -4.56968700 | 0.36595100  | -0.02366500 |
| H | -4.58740700 | 1.05418100  | 0.83086300  |
| H | -4.58108300 | 0.99400200  | -0.92242500 |
| C | -3.27659100 | -0.45528500 | 0.01074800  |
| H | -3.26389900 | -1.14573300 | -0.84262900 |
| H | -3.27082300 | -1.08483300 | 0.91013100  |
| C | -2.00572000 | 0.40143000  | -0.01477800 |
| H | -2.01633100 | 1.08946300  | 0.84048200  |
| H | -2.01386900 | 1.03352400  | -0.91216800 |
| C | -0.71107800 | -0.41901600 | 0.01297600  |
| H | -0.70054300 | -1.10623100 | -0.84299000 |
| H | -0.70319100 | -1.05215100 | 0.90974100  |
| C | 0.56006700  | 0.43740700  | -0.01170900 |
| H | 0.55056500  | 1.12335100  | 0.84529000  |
| H | 0.55107400  | 1.07193800  | -0.90747400 |
| C | 1.85475200  | -0.38304600 | 0.01264000  |

|   |            |             |             |
|---|------------|-------------|-------------|
| H | 1.86401400 | -1.06899100 | -0.84436300 |
| H | 1.86387700 | -1.01761300 | 0.90838700  |
| C | 3.12609000 | 0.47313500  | -0.01253100 |
| H | 3.11709000 | 1.15900700  | 0.84456900  |
| H | 3.11681200 | 1.10778400  | -0.90825000 |
| C | 4.42067600 | -0.34711900 | 0.01123200  |
| H | 4.43014300 | -1.03398100 | -0.84525800 |
| H | 4.43155100 | -0.98119000 | 0.90751800  |
| C | 5.69284700 | 0.50783700  | -0.01576400 |
| H | 5.68397100 | 1.19428400  | 0.83969400  |
| H | 5.68289300 | 1.14025300  | -0.91193700 |
| C | 6.98049400 | -0.32099900 | 0.00913100  |
| H | 7.03428000 | -0.99385500 | -0.85266500 |
| H | 7.86821400 | 0.31737600  | -0.01257700 |
| H | 7.03668400 | -0.93715900 | 0.91219200  |

**TS37:  $\text{H} + \text{CH}_3(\text{CH}_2)_{10}\text{CH}_3 \rightarrow \text{H}_2 + \text{CH}_2(\text{CH}_2)_{10}\text{CH}_3$**

|   |             |             |             |
|---|-------------|-------------|-------------|
| C | 6.97328500  | 0.20806000  | -0.15780500 |
| H | 7.05767500  | 1.09884600  | 0.87498100  |
| H | 7.01184400  | 0.86624400  | -1.02648600 |
| H | 7.89439000  | -0.35893800 | -0.02578600 |
| C | 5.68962400  | -0.56472100 | 0.02568400  |
| H | 5.65456500  | -1.37731000 | -0.71633300 |
| H | 5.69612100  | -1.06035000 | 1.00438100  |
| C | 4.42524700  | 0.29312100  | -0.11058300 |
| H | 4.43221900  | 0.78886500  | -1.08981800 |
| H | 4.45374700  | 1.09461100  | 0.63741600  |
| C | 3.12635500  | -0.50485200 | 0.04462100  |
| H | 3.12574000  | -1.00973300 | 1.01932300  |
| H | 3.09871400  | -1.30183000 | -0.70999100 |
| C | 1.86198400  | 0.35284200  | -0.07999600 |
| H | 1.87076900  | 0.87150700  | -1.04745900 |
| H | 1.88256700  | 1.13916900  | 0.68555600  |
| C | 0.56105100  | -0.44724200 | 0.05104800  |
| H | 0.55611100  | -0.97563400 | 1.01326400  |
| H | 0.53663700  | -1.22591700 | -0.72241700 |
| C | -0.70301300 | 0.41301700  | -0.05875500 |
| H | -0.69079100 | 0.95338000  | -1.01427400 |
| H | -0.68540300 | 1.18207000  | 0.72434700  |
| C | -2.00466500 | -0.38931800 | 0.04994700  |
| H | -2.01401200 | -0.93706700 | 1.00126300  |
| H | -2.02547500 | -1.15223900 | -0.73912400 |
| C | -3.26837800 | 0.47290600  | -0.04844200 |



|   |             |             |             |
|---|-------------|-------------|-------------|
| H | -3.25474800 | 1.02753600  | -0.99576600 |
| H | -3.25160400 | 1.23014200  | 0.74616200  |
| C | -4.57044800 | -0.33006900 | 0.04698600  |
| H | -4.58420600 | -0.88777500 | 0.99264700  |
| H | -4.58956800 | -1.08506500 | -0.74993800 |
| C | -5.83454800 | 0.53212000  | -0.04712000 |
| H | -5.82045000 | 1.09014900  | -0.99137600 |
| H | -5.81735000 | 1.28498800  | 0.75033400  |
| C | -7.13013400 | -0.27922400 | 0.04627200  |
| H | -7.19052600 | -0.82002300 | 0.99613400  |
| H | -8.01158400 | 0.36415100  | -0.02556500 |
| H | -7.19264800 | -1.01881000 | -0.75840500 |
| H | 7.09909700  | 1.67919300  | 1.59579700  |

**H-R38:  $\text{H} + \text{CH}_3(\text{CH}_2)_{10}\text{CH}_3 \rightarrow \text{H}_2 + \text{CH}_3\text{CH}(\text{CH}_2)_9\text{CH}_3$**

**$\text{CH}_3\text{CH}(\text{CH}_2)_9\text{CH}_3$**

|   |             |             |             |
|---|-------------|-------------|-------------|
| C | 7.13846000  | -0.17110000 | 0.15681900  |
| H | 7.46296200  | -0.74240400 | -0.72988200 |
| H | 7.12699800  | -0.88577700 | 0.98934200  |
| H | 7.91499700  | 0.57125800  | 0.35786400  |
| C | 5.80245500  | 0.45879500  | -0.04342900 |
| H | 5.75417000  | 1.48831400  | -0.38634700 |
| C | 4.55411100  | -0.35883300 | -0.06668800 |
| H | 4.56896000  | -1.07516200 | 0.76866400  |
| H | 4.53635100  | -0.99134100 | -0.97420500 |
| C | 3.25879000  | 0.46318700  | -0.01597300 |
| H | 3.24859600  | 1.16700700  | -0.85779300 |
| H | 3.25913500  | 1.07511700  | 0.89412600  |
| C | 1.98882500  | -0.39326300 | -0.05497100 |
| H | 2.00188800  | -1.09774900 | 0.78687900  |
| H | 1.99383300  | -1.00799300 | -0.96456700 |
| C | 0.69417200  | 0.42606100  | -0.00635500 |
| H | 0.67835600  | 1.12742000  | -0.85067700 |
| H | 0.69126700  | 1.04402200  | 0.90090700  |
| C | -0.57654600 | -0.43083000 | -0.03758000 |
| H | -0.56079700 | -1.13110000 | 0.80767500  |
| H | -0.57294600 | -1.05014900 | -0.94400100 |
| C | -1.87188600 | 0.38759500  | 0.00942900  |
| H | -1.88860400 | 1.08680100  | -0.83667300 |
| H | -1.87485400 | 1.00801900  | 0.91507000  |
| C | -3.14223700 | -0.46997100 | -0.01916800 |
| H | -3.12520500 | -1.16937500 | 0.82681300  |
| H | -3.13934000 | -1.09024900 | -0.92496500 |

|   |             |             |             |
|---|-------------|-------------|-------------|
| C | -4.43789800 | 0.34754200  | 0.02840300  |
| H | -4.45575400 | 1.04780400  | -0.81703300 |
| H | -4.44230300 | 0.96731100  | 0.93469800  |
| C | -5.70875200 | -0.50931400 | -0.00138700 |
| H | -5.69113200 | -1.20951600 | 0.84271600  |
| H | -5.70549400 | -1.12704300 | -0.90781100 |
| C | -6.99769500 | 0.31637500  | 0.04839400  |
| H | -7.06044500 | 1.00317000  | -0.80172900 |
| H | -7.88435600 | -0.32339600 | 0.02406000  |
| H | -7.04708700 | 0.91753000  | 0.96191700  |

**TS38:  $\text{H} + \text{CH}_3(\text{CH}_2)_{10}\text{CH}_3 \rightarrow \text{H}_2 + \text{CH}_3\text{CH}(\text{CH}_2)_9\text{CH}_3$**

|   |             |             |             |
|---|-------------|-------------|-------------|
| C | -7.01075500 | -0.32997300 | -0.04097700 |
| H | -7.06134100 | -0.94483400 | 0.86288700  |
| H | -7.12820800 | -1.00125700 | -0.90117500 |
| H | -7.86642900 | 0.35032500  | -0.03526100 |
| C | -5.70131600 | 0.42370400  | -0.12016800 |
| H | -5.67134000 | 1.15089700  | -0.93637900 |
| H | -5.69776900 | 1.21851400  | 0.92671600  |
| C | -4.43281200 | -0.39692600 | -0.00860000 |
| H | -4.43188800 | -1.15478700 | -0.80770900 |
| H | -4.44895500 | -0.96076000 | 0.93334500  |
| C | -3.14301400 | 0.42780200  | -0.09511100 |
| H | -3.14924900 | 1.18937300  | 0.69379400  |
| H | -3.12831100 | 0.97373900  | -1.04712000 |
| C | -1.87016200 | -0.41751500 | 0.02453000  |
| H | -1.87387500 | -1.19116600 | -0.75442200 |
| H | -1.88068000 | -0.95212700 | 0.98316600  |
| C | -0.57840700 | 0.40058900  | -0.08382100 |
| H | -0.58207300 | 1.18555200  | 0.68340400  |
| H | -0.56076800 | 0.92128400  | -1.05009500 |
| C | 0.69512400  | -0.44019900 | 0.06102900  |
| H | 0.68903900  | -1.23918600 | -0.69187700 |
| H | 0.68620500  | -0.94335700 | 1.03665000  |
| C | 1.98767000  | 0.37214900  | -0.07720600 |
| H | 1.98567300  | 1.18422400  | 0.66150600  |
| H | 2.00488700  | 0.85821500  | -1.06136700 |
| C | 3.26088500  | -0.46368600 | 0.09617700  |
| H | 3.25423500  | -1.28794200 | -0.62906900 |
| H | 3.25178900  | -0.93348800 | 1.08833300  |
| C | 4.55397700  | 0.34221000  | -0.06929300 |
| H | 4.55657600  | 1.17522700  | 0.64608700  |
| H | 4.56969400  | 0.80043800  | -1.06693000 |

|   |             |             |             |
|---|-------------|-------------|-------------|
| C | 5.82745200  | -0.48907200 | 0.12283600  |
| H | 5.82207700  | -1.32635700 | -0.58590800 |
| H | 5.81628700  | -0.93895800 | 1.12315800  |
| C | 7.11423600  | 0.32148000  | -0.05725800 |
| H | 7.16685400  | 1.14620100  | 0.66074900  |
| H | 8.00236700  | -0.30027200 | 0.08660200  |
| H | 7.17145000  | 0.75462800  | -1.06098900 |
| H | -5.71351600 | 1.76249000  | 1.72907700  |

**H-R39:  $\text{H} + \text{CH}_3(\text{CH}_2)_{10}\text{CH}_3 \rightarrow \text{H}_2 + \text{CH}_3\text{CH}_2\text{CH}(\text{CH}_2)_8\text{CH}_3$**   
 **$\text{CH}_3\text{CH}_2\text{CH}(\text{CH}_2)_8\text{CH}_3$**

|   |             |             |             |
|---|-------------|-------------|-------------|
| C | -7.01868000 | 0.52955400  | 0.20356000  |
| H | -7.12510300 | 1.11659800  | -0.71368200 |
| H | -6.86946100 | 1.22911200  | 1.03088000  |
| H | -7.96173600 | 0.00316000  | 0.37320700  |
| C | -5.84525700 | -0.45098900 | 0.09417100  |
| H | -5.78261700 | -1.05925000 | 1.00828400  |
| H | -6.06218500 | -1.17916500 | -0.70864100 |
| C | -4.52801500 | 0.20351200  | -0.15984400 |
| H | -4.51936600 | 1.19607200  | -0.60449100 |
| C | -3.24748700 | -0.56088200 | -0.10075100 |
| H | -3.18500000 | -1.25560000 | -0.95934200 |
| H | -3.24800200 | -1.21404500 | 0.78456200  |
| C | -1.98887200 | 0.31839300  | -0.09030200 |
| H | -2.02889100 | 0.98963800  | 0.77597900  |
| H | -1.99630700 | 0.96392200  | -0.97767000 |
| C | -0.68261000 | -0.48186100 | -0.05670400 |
| H | -0.64698600 | -1.15373400 | -0.92422600 |
| H | -0.67779600 | -1.13032000 | 0.82913100  |
| C | 0.57373900  | 0.39629600  | -0.04589700 |
| H | 0.53783800  | 1.06796100  | 0.82160900  |
| H | 0.56880200  | 1.04499200  | -0.93148400 |
| C | 1.88206000  | -0.40193000 | -0.01227200 |
| H | 1.91785700  | -1.07397200 | -0.87956700 |
| H | 1.88742700  | -1.05024000 | 0.87359900  |
| C | 3.13798300  | 0.47697900  | -0.00239000 |
| H | 3.10221500  | 1.14883900  | 0.86507500  |
| H | 3.13215800  | 1.12558500  | -0.88808300 |
| C | 4.44682900  | -0.31999700 | 0.03061600  |
| H | 4.48365700  | -0.99223900 | -0.83670000 |
| H | 4.45408800  | -0.96854900 | 0.91651300  |
| C | 5.70307400  | 0.55854800  | 0.03995500  |
| H | 5.66692300  | 1.22978600  | 0.90672200  |

|   |            |             |             |
|---|------------|-------------|-------------|
| H | 5.69641100 | 1.20612200  | -0.84535000 |
| C | 7.00555500 | -0.24648400 | 0.07300100  |
| H | 7.08799200 | -0.90144100 | -0.80025100 |
| H | 7.88117300 | 0.40873000  | 0.07995800  |
| H | 7.05699700 | -0.87880000 | 0.96512300  |

**TS39:  $\text{H} + \text{CH}_3(\text{CH}_2)_{10}\text{CH}_3 \rightarrow \text{H}_2 + \text{CH}_3\text{CH}_2\text{CH}(\text{CH}_2)_8\text{CH}_3$**

|   |             |             |             |
|---|-------------|-------------|-------------|
| C | -6.99606400 | 0.30766700  | -0.13556300 |
| H | -7.02639100 | 0.74133400  | -1.13989300 |
| H | -7.03707500 | 1.13075300  | 0.58334700  |
| H | -7.89904000 | -0.29471000 | -0.00591700 |
| C | -5.73372100 | -0.53671300 | 0.06259000  |
| H | -5.74597800 | -0.99612400 | 1.05859100  |
| H | -5.73896300 | -1.37426700 | -0.65092900 |
| C | -4.44508900 | 0.24117000  | -0.11173200 |
| H | -4.45348200 | 1.13513200  | 0.85716100  |
| H | -4.44871300 | 0.88460200  | -0.99727700 |
| C | -3.14960600 | -0.52449200 | 0.06153300  |
| H | -3.11964900 | -1.33804100 | -0.68012700 |
| H | -3.14729500 | -1.01748700 | 1.04232400  |
| C | -1.88876400 | 0.33633900  | -0.08425300 |
| H | -1.90771800 | 1.13142000  | 0.67066000  |
| H | -1.90693700 | 0.84009100  | -1.05915100 |
| C | -0.58709700 | -0.46176000 | 0.04813000  |
| H | -0.56112300 | -1.24250700 | -0.72330400 |
| H | -0.58061400 | -0.98721300 | 1.01187600  |
| C | 0.67475400  | 0.40146700  | -0.06324000 |
| H | 0.65893200  | 1.16582400  | 0.72430900  |
| H | 0.65744600  | 0.94719100  | -1.01560600 |
| C | 1.97803600  | -0.39956300 | 0.03504800  |
| H | 2.00131000  | -1.15074800 | -0.76513600 |
| H | 1.98777800  | -0.96113000 | 0.97825900  |
| C | 3.23982100  | 0.46699400  | -0.04893400 |
| H | 3.22337600  | 1.20768500  | 0.76106200  |
| H | 3.22307500  | 1.04090800  | -0.98464500 |
| C | 4.54351000  | -0.33546100 | 0.02699200  |
| H | 4.56450700  | -1.07002100 | -0.78875300 |
| H | 4.55800000  | -0.91687000 | 0.95825900  |
| C | 5.80583900  | 0.53148600  | -0.04446400 |
| H | 5.78820200  | 1.26150800  | 0.77392300  |
| H | 5.78953600  | 1.11591700  | -0.97257500 |
| C | 7.10298600  | -0.27984800 | 0.02434400  |
| H | 7.16626200  | -0.99525500 | -0.80182800 |

|   |             |             |             |
|---|-------------|-------------|-------------|
| H | 7.98319000  | 0.36701300  | -0.02902500 |
| H | 7.16494300  | -0.84826500 | 0.95783700  |
| H | -4.46121000 | 1.73954000  | 1.61385400  |

**H-R40:  $\text{H} + \text{CH}_3(\text{CH}_2)_{10}\text{CH}_3 \rightarrow \text{H}_2 + \text{CH}_3(\text{CH}_2)_2\text{CH}(\text{CH}_2)_7\text{CH}_3$**   
 **$\text{CH}_3(\text{CH}_2)_2\text{CH}(\text{CH}_2)_7\text{CH}_3$**

|   |             |             |             |
|---|-------------|-------------|-------------|
| C | -7.07784600 | 0.04041900  | 0.28980800  |
| H | -7.31936100 | 0.69948000  | -0.55030400 |
| H | -7.09192500 | 0.64807000  | 1.20027800  |
| H | -7.87947400 | -0.69868100 | 0.37263300  |
| C | -5.71662900 | -0.63169700 | 0.09337100  |
| H | -5.51438100 | -1.30822800 | 0.93131400  |
| H | -5.74334400 | -1.25806700 | -0.80616800 |
| C | -4.55934500 | 0.36961500  | -0.03054100 |
| H | -4.52676300 | 1.00611200  | 0.86667600  |
| H | -4.78614200 | 1.06803300  | -0.85807500 |
| C | -3.22361300 | -0.25960900 | -0.24773800 |
| H | -3.18472000 | -1.25378200 | -0.68710100 |
| C | -1.95991800 | 0.53012800  | -0.16319400 |
| H | -1.98935000 | 1.18015900  | 0.72400900  |
| H | -1.89607600 | 1.22921300  | -1.01814700 |
| C | -0.68429100 | -0.32367700 | -0.13298700 |
| H | -0.66369100 | -0.96691000 | -1.02183900 |
| H | -0.72566100 | -0.99790100 | 0.73093900  |
| C | 0.60501400  | 0.50225400  | -0.07519300 |
| H | 0.58252800  | 1.14750600  | 0.81271500  |
| H | 0.64146300  | 1.17776400  | -0.93984700 |
| C | 1.87821000  | -0.35091000 | -0.04674500 |
| H | 1.90038900  | -0.99623600 | -0.93452300 |
| H | 1.84153600  | -1.02639500 | 0.81774500  |
| C | 3.16988100  | 0.47267600  | 0.01092900  |
| H | 3.14902400  | 1.11633500  | 0.89999600  |
| H | 3.20570200  | 1.14977500  | -0.85245200 |
| C | 4.44248100  | -0.38122300 | 0.03576100  |
| H | 4.46459400  | -1.02426000 | -0.85389700 |
| H | 4.40701400  | -1.05951700 | 0.89839300  |
| C | 5.73549700  | 0.44017100  | 0.09515300  |
| H | 5.71467000  | 1.08105100  | 0.98510900  |
| H | 5.77144700  | 1.11852200  | -0.76607900 |
| C | 7.00065500  | -0.42265600 | 0.11772300  |
| H | 7.06891700  | -1.04776400 | -0.77831600 |
| H | 7.90401600  | 0.19211400  | 0.16290500  |
| H | 7.00902000  | -1.08933700 | 0.98594800  |

**TS40:  $\text{H} + \text{CH}_3(\text{CH}_2)_{10}\text{CH}_3 \rightarrow \text{H}_2 + \text{CH}_3(\text{CH}_2)_2\text{CH}(\text{CH}_2)_7\text{CH}_3$** 

|   |             |             |             |
|---|-------------|-------------|-------------|
| C | -7.03084000 | -0.27306700 | 0.02980200  |
| H | -7.10513100 | -0.69522100 | 1.03692800  |
| H | -7.10865700 | -1.10120400 | -0.68201800 |
| H | -7.89697900 | 0.37684400  | -0.12152600 |
| C | -5.71897100 | 0.49493100  | -0.15239500 |
| H | -5.68969400 | 0.93766400  | -1.15526500 |
| H | -5.68340200 | 1.33283000  | 0.55284200  |
| C | -4.47591100 | -0.38114500 | 0.04515500  |
| H | -4.50724400 | -1.21768500 | -0.67048400 |
| H | -4.50606100 | -0.84272500 | 1.04091700  |
| C | -3.16451900 | 0.35807100  | -0.12457200 |
| H | -3.14519000 | 1.24700300  | 0.84820900  |
| H | -3.14661300 | 1.00515500  | -1.00716000 |
| C | -1.89311000 | -0.44764800 | 0.04696300  |
| H | -1.88728200 | -1.25855000 | -0.69814300 |
| H | -1.90732700 | -0.94476200 | 1.02554700  |
| C | -0.60620200 | 0.37449000  | -0.09346700 |
| H | -0.60243100 | 1.16770600  | 0.66364600  |
| H | -0.60629900 | 0.88120200  | -1.06700500 |
| C | 0.66987200  | -0.46378900 | 0.04020900  |
| H | 0.67339300  | -1.24342500 | -0.73277100 |
| H | 0.65752100  | -0.99114200 | 1.00286300  |
| C | 1.95828900  | 0.35984400  | -0.06612700 |
| H | 1.96261700  | 1.12514600  | 0.72065200  |
| H | 1.96246600  | 0.90479600  | -1.01906900 |
| C | 3.23562100  | -0.48114300 | 0.03958100  |
| H | 3.23883800  | -1.23484100 | -0.75860000 |
| H | 3.22366800  | -1.04019900 | 0.98429300  |
| C | 4.52416600  | 0.34498100  | -0.04083200 |
| H | 4.52592000  | 1.09162500  | 0.76405100  |
| H | 4.53320100  | 0.91285000  | -0.98048200 |
| C | 5.80246700  | -0.49625200 | 0.05090100  |
| H | 5.80491000  | -1.23741400 | -0.75765500 |
| H | 5.79093700  | -1.06836000 | 0.98672300  |
| C | 7.08405800  | 0.33927200  | -0.01998000 |
| H | 7.12773400  | 1.06625900  | 0.79725500  |
| H | 7.97627200  | -0.28956000 | 0.04754200  |
| H | 7.14128400  | 0.89678600  | -0.96032700 |
| H | -3.13597000 | 1.84795100  | 1.60760700  |

**H-R41:  $\text{H} + \text{CH}_3(\text{CH}_2)_{10}\text{CH}_3 \rightarrow \text{H}_2 + \text{CH}_3(\text{CH}_2)_3\text{CH}(\text{CH}_2)_6\text{CH}_3$   
 $\text{CH}_3(\text{CH}_2)_3\text{CH}(\text{CH}_2)_6\text{CH}_3$**

|   |             |             |             |
|---|-------------|-------------|-------------|
| C | -7.00202100 | 0.57341400  | 0.20026600  |
| H | -7.09114400 | 1.11742800  | -0.74545100 |
| H | -6.91456200 | 1.31542600  | 1.00026800  |
| H | -7.93533200 | 0.02533700  | 0.35675600  |
| C | -5.79482700 | -0.36871200 | 0.18478100  |
| H | -5.75299500 | -0.92386300 | 1.12994800  |
| H | -5.92848500 | -1.12057600 | -0.60277100 |
| C | -4.46334900 | 0.35779100  | -0.03238100 |
| H | -4.32473400 | 1.10797800  | 0.75581600  |
| H | -4.50388200 | 0.91264400  | -0.97842200 |
| C | -3.24845900 | -0.57961200 | -0.05259600 |
| H | -3.40834400 | -1.34956400 | -0.83052300 |
| H | -3.20512600 | -1.14618700 | 0.89018700  |
| C | -1.94450500 | 0.10953100  | -0.28195100 |
| H | -1.95002300 | 1.08982800  | -0.75265900 |
| C | -0.64386600 | -0.61121000 | -0.15303100 |
| H | -0.53463100 | -1.33861000 | -0.97929300 |
| H | -0.65181200 | -1.22760200 | 0.75841700  |
| C | 0.58700800  | 0.30619100  | -0.14214100 |
| H | 0.50307700  | 1.00718800  | 0.69707500  |
| H | 0.58484300  | 0.91831600  | -1.05291800 |
| C | 1.91507900  | -0.45176400 | -0.04447600 |
| H | 1.99496900  | -1.15178900 | -0.88644500 |
| H | 1.91434200  | -1.06890300 | 0.86346500  |
| C | 3.14408900  | 0.46418100  | -0.03087100 |
| H | 3.06623800  | 1.16110000  | 0.81372000  |
| H | 3.14241500  | 1.08464500  | -0.93650500 |
| C | 4.47419800  | -0.29205700 | 0.05991800  |
| H | 4.55348800  | -0.98827100 | -0.78539600 |
| H | 4.47700300  | -0.91363000 | 0.96496700  |
| C | 5.70346100  | 0.62368100  | 0.07455200  |
| H | 5.62566600  | 1.31784300  | 0.92029200  |
| H | 5.70030600  | 1.24546600  | -0.82907400 |
| C | 7.02785800  | -0.14030100 | 0.16301400  |
| H | 7.15281000  | -0.81579500 | -0.68930800 |
| H | 7.88311100  | 0.54122300  | 0.17396600  |
| H | 7.07480800  | -0.74642600 | 1.07338000  |

**TS41:  $\text{H} + \text{CH}_3(\text{CH}_2)_{10}\text{CH}_3 \rightarrow \text{H}_2 + \text{CH}_3(\text{CH}_2)_3\text{CH}(\text{CH}_2)_6\text{CH}_3$**

|   |             |             |             |
|---|-------------|-------------|-------------|
| C | -7.02371000 | 0.34240500  | -0.11062800 |
| H | -7.06466300 | 0.77894900  | -1.11364700 |
| H | -7.06482400 | 1.16593900  | 0.60925900  |
| H | -7.92495200 | -0.26191300 | 0.02500100  |

|   |             |             |             |
|---|-------------|-------------|-------------|
| C | -5.75533400 | -0.49477800 | 0.07715300  |
| H | -5.76100300 | -0.94678900 | 1.07643300  |
| H | -5.76122600 | -1.33015200 | -0.63395900 |
| C | -4.46530700 | 0.31294000  | -0.10197600 |
| H | -4.45293400 | 1.14040000  | 0.61790700  |
| H | -4.46269200 | 0.77456900  | -1.09786500 |
| C | -3.19166400 | -0.52345800 | 0.06831100  |
| H | -3.19614600 | -1.34256700 | -0.66762900 |
| H | -3.19875700 | -1.00999200 | 1.05244200  |
| C | -1.90836200 | 0.26646200  | -0.08895900 |
| H | -1.91091300 | 1.12309100  | 0.91214800  |
| H | -1.92127800 | 0.94194100  | -0.95004200 |
| C | -0.60774300 | -0.49878000 | 0.04550800  |
| H | -0.57720100 | -1.28025100 | -0.72974800 |
| H | -0.59735800 | -1.03228200 | 1.00478800  |
| C | 0.64738200  | 0.37491900  | -0.07068000 |
| H | 0.62600300  | 1.13988100  | 0.71458900  |
| H | 0.62293900  | 0.91598100  | -1.02525500 |
| C | 1.95442600  | -0.41941300 | 0.02721300  |
| H | 1.98093000  | -1.17325400 | -0.77046000 |
| H | 1.96925900  | -0.97721100 | 0.97251000  |
| C | 3.21035600  | 0.45504400  | -0.06162500 |
| H | 3.18937200  | 1.19887800  | 0.74522800  |
| H | 3.18917500  | 1.02478000  | -0.99977300 |
| C | 4.51915200  | -0.33875300 | 0.01687400  |
| H | 4.54493700  | -1.07626600 | -0.79607200 |
| H | 4.53767500  | -0.91635700 | 0.95041300  |
| C | 5.77554700  | 0.53648200  | -0.05804600 |
| H | 5.75275000  | 1.26962400  | 0.75738100  |
| H | 5.75539800  | 1.11701600  | -0.98851700 |
| C | 7.07814500  | -0.26572500 | 0.01424000  |
| H | 7.14653800  | -0.98405500 | -0.80898900 |
| H | 7.95385100  | 0.38697500  | -0.04163800 |
| H | 7.14386800  | -0.82982600 | 0.95008000  |
| H | -1.91607400 | 1.69881800  | 1.69110400  |

**H-R42:**  $\text{H} + \text{CH}_3(\text{CH}_2)_{10}\text{CH}_3 \rightarrow \text{H}_2 + \text{CH}_3(\text{CH}_2)_4\text{CH}(\text{CH}_2)_5\text{CH}_3$   
 $\text{CH}_3(\text{CH}_2)_4\text{CH}(\text{CH}_2)_5\text{CH}_3$

|   |             |             |             |
|---|-------------|-------------|-------------|
| C | -7.04605800 | 0.04896900  | 0.27359200  |
| H | -7.22877700 | 0.77162300  | -0.52810200 |
| H | -7.07336400 | 0.59497100  | 1.22198500  |
| H | -7.87784600 | -0.66105300 | 0.27582500  |
| C | -5.70314500 | -0.66198800 | 0.08252500  |



|   |             |             |             |
|---|-------------|-------------|-------------|
| H | -5.56622500 | -1.40388200 | 0.87877800  |
| H | -5.71965600 | -1.22642200 | -0.85784600 |
| C | -4.50570800 | 0.29499300  | 0.07430000  |
| H | -4.48999100 | 0.86023100  | 1.01548400  |
| H | -4.64346600 | 1.03789600  | -0.72246300 |
| C | -3.15832600 | -0.40874300 | -0.11632600 |
| H | -3.17316200 | -0.97235800 | -1.05779000 |
| H | -3.01660400 | -1.14884900 | 0.68057700  |
| C | -1.96068600 | 0.55129100  | -0.12681900 |
| H | -1.94127200 | 1.12597700  | 0.81160800  |
| H | -2.12374600 | 1.31163000  | -0.91356200 |
| C | -0.64117500 | -0.11543800 | -0.33202800 |
| H | -0.62081600 | -1.08937000 | -0.81548400 |
| C | 0.64500300  | 0.62281200  | -0.16307000 |
| H | 0.60902400  | 1.22035900  | 0.76023500  |
| H | 0.75911000  | 1.36857500  | -0.97209900 |
| C | 1.88983600  | -0.27540400 | -0.14546700 |
| H | 1.91826400  | -0.86538700 | -1.07029100 |
| H | 1.79794800  | -0.99756500 | 0.67477500  |
| C | 3.20293500  | 0.50048100  | 0.00152600  |
| H | 3.17127300  | 1.09439000  | 0.92431600  |
| H | 3.29091200  | 1.22269900  | -0.82069700 |
| C | 4.44606000  | -0.39574900 | 0.02135200  |
| H | 4.47889700  | -0.99048200 | -0.90094500 |
| H | 4.35916400  | -1.11768400 | 0.84394500  |
| C | 5.76123200  | 0.37810000  | 0.16815300  |
| H | 5.72856400  | 0.97259200  | 1.08940000  |
| H | 5.84937400  | 1.09847700  | -0.65437500 |
| C | 6.99723700  | -0.52596000 | 0.18835800  |
| H | 7.07677900  | -1.10776600 | -0.73547400 |
| H | 7.91716000  | 0.05593100  | 0.29405500  |
| H | 6.95523400  | -1.23470900 | 1.02155400  |

**TS42:  $\text{H} + \text{CH}_3(\text{CH}_2)_{10}\text{CH}_3 \rightarrow \text{H}_2 + \text{CH}_3(\text{CH}_2)_4\text{CH}(\text{CH}_2)_5\text{CH}_3$**

|   |             |             |             |
|---|-------------|-------------|-------------|
| C | -7.05455100 | -0.25239700 | 0.01318500  |
| H | -7.12361100 | -0.80141300 | 0.95768600  |
| H | -7.13228400 | -0.98238600 | -0.79889400 |
| H | -7.92373400 | 0.40818300  | -0.05051700 |
| C | -5.74446800 | 0.53588000  | -0.07416300 |
| H | -5.72097900 | 1.10240100  | -1.01313500 |
| H | -5.71202300 | 1.28045100  | 0.73036200  |
| C | -4.49665000 | -0.35059400 | 0.01070900  |
| H | -4.53049900 | -1.09872100 | -0.79227500 |

|   |             |             |             |
|---|-------------|-------------|-------------|
| H | -4.51937800 | -0.91495300 | 0.95212900  |
| C | -3.18189200 | 0.43142700  | -0.07911300 |
| H | -3.15019800 | 1.18294800  | 0.71870800  |
| H | -3.15506800 | 0.98799000  | -1.02470200 |
| C | -1.93512600 | -0.45651800 | 0.01790100  |
| H | -1.96982300 | -1.21663100 | -0.77805200 |
| H | -1.95355100 | -1.01535200 | 0.96255200  |
| C | -0.62774700 | 0.30130600  | -0.09081100 |
| H | -0.61913400 | 1.12211900  | 0.93992300  |
| H | -0.60873600 | 1.00608500  | -0.92796000 |
| C | 0.64910500  | -0.50376600 | 0.03972300  |
| H | 0.65102200  | -1.29266800 | -0.72842000 |
| H | 0.64875000  | -1.02918000 | 1.00365500  |
| C | 1.92909400  | 0.33046900  | -0.09204200 |
| H | 1.91516800  | 1.13153300  | 0.65674400  |
| H | 1.93535900  | 0.82696100  | -1.07082400 |
| C | 3.21247000  | -0.49167400 | 0.06827000  |
| H | 3.21650300  | -1.30638600 | -0.66777700 |
| H | 3.21100200  | -0.97384900 | 1.05439300  |
| C | 4.49363700  | 0.33490100  | -0.08760100 |
| H | 4.48397800  | 1.15866700  | 0.63811500  |
| H | 4.50253900  | 0.80551600  | -1.07951600 |
| C | 5.77873500  | -0.48056100 | 0.09441000  |
| H | 5.78570300  | -1.30886300 | -0.62479300 |
| H | 5.77383900  | -0.94286300 | 1.08907000  |
| C | 7.05359000  | 0.35087300  | -0.07495600 |
| H | 7.09406000  | 1.16701700  | 0.65349100  |
| H | 7.95052200  | -0.25978500 | 0.06141600  |
| H | 7.10479300  | 0.79744500  | -1.07310600 |
| H | -0.61140600 | 1.66965400  | 1.73866000  |

### 2.1.13 C13 (*n*-C<sub>13</sub>H<sub>28</sub>)

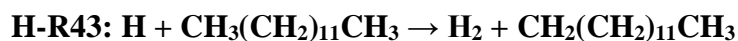

*n*-C<sub>13</sub>H<sub>28</sub>

|   |            |             |             |
|---|------------|-------------|-------------|
| C | 7.69200200 | -0.39093400 | 0.00002100  |
| H | 7.73708200 | -1.03665200 | -0.88285500 |
| H | 7.73706300 | -1.03654200 | 0.88297900  |
| H | 8.58950700 | 0.23409600  | -0.00000800 |
| C | 6.41710900 | 0.45786700  | -0.00005100 |
| H | 6.41768000 | 1.11779400  | 0.87617100  |
| H | 6.41770000 | 1.11768500  | -0.87635500 |
| C | 5.13211900 | -0.37811100 | -0.00001300 |
| H | 5.13237300 | -1.03897700 | 0.87682700  |

|   |             |             |             |
|---|-------------|-------------|-------------|
| H | 5.13236700  | -1.03904500 | -0.87680300 |
| C | 3.84985100  | 0.46163800  | -0.00003400 |
| H | 3.85045800  | 1.12224600  | -0.87689100 |
| H | 3.85047100  | 1.12231700  | 0.87676800  |
| C | 2.56603700  | -0.37612000 | 0.00001200  |
| H | 2.56567800  | -1.03678100 | 0.87679800  |
| H | 2.56564600  | -1.03682500 | -0.87674100 |
| C | 1.28326600  | 0.46318100  | 0.00001300  |
| H | 1.28345800  | 1.12382200  | -0.87679600 |
| H | 1.28347000  | 1.12383900  | 0.87681000  |
| C | 0.00000000  | -0.37535500 | 0.00002900  |
| H | 0.00000800  | -1.03603700 | 0.87680900  |
| H | -0.00000800 | -1.03604500 | -0.87674500 |
| C | -1.28326600 | 0.46318100  | 0.00003600  |
| H | -1.28346100 | 1.12384100  | -0.87675900 |
| H | -1.28346700 | 1.12382000  | 0.87684800  |
| C | -2.56603700 | -0.37612000 | 0.00002100  |
| H | -2.56566300 | -1.03681900 | 0.87677800  |
| H | -2.56566100 | -1.03678700 | -0.87676100 |
| C | -3.84985100 | 0.46163900  | 0.00003300  |
| H | -3.85045400 | 1.12231100  | -0.87677400 |
| H | -3.85047500 | 1.12225200  | 0.87688500  |
| C | -5.13211900 | -0.37811100 | -0.00001100 |
| H | -5.13238000 | -1.03904400 | 0.87677900  |
| H | -5.13236000 | -1.03897800 | -0.87685100 |
| C | -6.41710900 | 0.45786700  | 0.00000500  |
| H | -6.41767500 | 1.11777900  | -0.87622900 |
| H | -6.41770500 | 1.11770000  | 0.87629700  |
| C | -7.69200200 | -0.39093400 | -0.00005500 |
| H | -7.73708800 | -1.03663700 | 0.88283200  |
| H | -8.58950700 | 0.23409600  | -0.00004300 |
| H | -7.73705700 | -1.03655700 | -0.88300300 |

**CH<sub>2</sub>(CH<sub>2</sub>)<sub>11</sub>CH<sub>3</sub>**

|   |             |             |             |
|---|-------------|-------------|-------------|
| C | -7.74322800 | -0.37133100 | 0.00186200  |
| H | -7.76295900 | -1.36466000 | -0.43250900 |
| H | -8.68608500 | 0.05866700  | 0.31782800  |
| C | -6.49178700 | 0.43601000  | 0.00063800  |
| H | -6.46787100 | 1.08588400  | -0.89313200 |
| H | -6.49654700 | 1.13116800  | 0.85075200  |
| C | -5.20477700 | -0.40308000 | 0.02363800  |
| H | -5.21121900 | -1.08945700 | -0.83253300 |
| H | -5.20499700 | -1.03335200 | 0.92091100  |

|   |             |             |             |
|---|-------------|-------------|-------------|
| C | -3.92595200 | 0.44026500  | -0.00935000 |
| H | -3.92457600 | 1.12858300  | 0.84583100  |
| H | -3.93146800 | 1.07216800  | -0.90707400 |
| C | -2.64054700 | -0.39458000 | 0.01322700  |
| H | -2.63976300 | -1.08027000 | -0.84397000 |
| H | -2.63746800 | -1.02924000 | 0.90882600  |
| C | -1.36020200 | 0.44806400  | -0.01270900 |
| H | -1.36099600 | 1.13283600  | 0.84526800  |
| H | -1.36357300 | 1.08384700  | -0.90761900 |
| C | -0.07458400 | -0.38657500 | 0.00889300  |
| H | -0.07281100 | -1.06999500 | -0.85016300 |
| H | -0.07239600 | -1.02385500 | 0.90273500  |
| C | 1.20596000  | 0.45582900  | -0.01349400 |
| H | 1.20412300  | 1.13907000  | 0.84572000  |
| H | 1.20388400  | 1.09331400  | -0.90721000 |
| C | 2.49150000  | -0.37894400 | 0.00825700  |
| H | 2.49365000  | -1.06179000 | -0.85125800 |
| H | 2.49313100  | -1.01687500 | 0.90164200  |
| C | 3.77231200  | 0.46313200  | -0.01295200 |
| H | 3.77002000  | 1.14630600  | 0.84634300  |
| H | 3.77107900  | 1.10070000  | -0.90664000 |
| C | 5.05759400  | -0.37165900 | 0.00965000  |
| H | 5.06057700  | -1.05558300 | -0.84922600 |
| H | 5.06008400  | -1.00892900 | 0.90371500  |
| C | 6.33936100  | 0.46899400  | -0.01250200 |
| H | 6.33690300  | 1.15252500  | 0.84533100  |
| H | 6.33790300  | 1.10457300  | -0.90648300 |
| C | 7.61748300  | -0.37448400 | 0.01146000  |
| H | 7.66501400  | -1.04478400 | -0.85267800 |
| H | 8.51244500  | 0.25380700  | -0.00647000 |
| H | 7.66511000  | -0.99450400 | 0.91235900  |

**TS43:  $\text{H} + \text{CH}_3(\text{CH}_2)_{11}\text{CH}_3 \rightarrow \text{H}_2 + \text{CH}_2(\text{CH}_2)_{11}\text{CH}_3$**

|   |            |             |             |
|---|------------|-------------|-------------|
| C | 7.60883100 | 0.28730100  | -0.16639300 |
| H | 7.67815000 | 1.19629700  | 0.85145400  |
| H | 7.63470700 | 0.93174100  | -1.04579300 |
| H | 8.54018000 | -0.26070200 | -0.02625700 |
| C | 6.33961800 | -0.50559700 | 0.03118700  |
| H | 6.31890800 | -1.33064100 | -0.69756700 |
| H | 6.35613600 | -0.98516800 | 1.01772500  |
| C | 5.05969600 | 0.32668500  | -0.11711800 |
| H | 5.05786400 | 0.80914600  | -1.10298300 |
| H | 5.07302900 | 1.13873200  | 0.61988700  |

|   |             |             |             |
|---|-------------|-------------|-------------|
| C | 3.77555500  | -0.49279400 | 0.04850900  |
| H | 3.78627400  | -0.98926200 | 1.02746300  |
| H | 3.76030700  | -1.29661000 | -0.69920100 |
| C | 2.49593600  | 0.34137800  | -0.07975500 |
| H | 2.49608900  | 0.85757400  | -1.04857400 |
| H | 2.50158500  | 1.13000900  | 0.68369400  |
| C | 1.20947100  | -0.48167900 | 0.05205900  |
| H | 1.21639500  | -1.01386800 | 1.01216700  |
| H | 1.19649300  | -1.25760000 | -0.72444100 |
| C | -0.06959200 | 0.35702700  | -0.05052700 |
| H | -0.06623400 | 0.90733900  | -1.00042100 |
| H | -0.06632700 | 1.11816700  | 0.74044800  |
| C | -1.35696900 | -0.46930500 | 0.04835900  |
| H | -1.35462500 | -1.03227200 | 0.99080500  |
| H | -1.36639700 | -1.21975600 | -0.75279000 |
| C | -2.63549400 | 0.37254300  | -0.03329700 |
| H | -2.63124300 | 0.94702300  | -0.96877100 |
| H | -2.63233200 | 1.11318500  | 0.77691600  |
| C | -3.92349200 | -0.45516400 | 0.04426100  |
| H | -3.92440300 | -1.03676900 | 0.97536100  |
| H | -3.93046800 | -1.18955600 | -0.77167100 |
| C | -5.20152300 | 0.38818000  | -0.02499100 |
| H | -5.19933000 | 0.97425700  | -0.95345000 |
| H | -5.19771600 | 1.11912200  | 0.79422200  |
| C | -6.49059900 | -0.43857200 | 0.04494400  |
| H | -6.49227000 | -1.02561000 | 0.97154900  |
| H | -6.49670200 | -1.16671900 | -0.77533200 |
| C | -7.76134900 | 0.41377800  | -0.02096800 |
| H | -7.80600900 | 0.98561000  | -0.95337100 |
| H | -8.66172300 | -0.20473400 | 0.03216800  |
| H | -7.80081700 | 1.12929200  | 0.80654900  |
| H | 7.70994000  | 1.78907600  | 1.56260900  |

**H-R44:**  $\text{H} + \text{CH}_3(\text{CH}_2)_{11}\text{CH}_3 \rightarrow \text{H}_2 + \text{CH}_3\text{CH}(\text{CH}_2)_{10}\text{CH}_3$

**$\text{CH}_3\text{CH}(\text{CH}_2)_{10}\text{CH}_3$**

|   |             |             |             |
|---|-------------|-------------|-------------|
| C | -7.77827000 | -0.25149900 | -0.15329800 |
| H | -8.09144700 | -0.82223100 | 0.73782500  |
| H | -7.75667700 | -0.97137100 | -0.98113800 |
| H | -8.56740600 | 0.47654600  | -0.35758100 |
| C | -6.45251400 | 0.40177000  | 0.04002400  |
| H | -6.42058400 | 1.43423200  | 0.37590800  |
| C | -5.19069500 | -0.39485000 | 0.06586400  |
| H | -5.19321900 | -1.11361200 | -0.76755500 |

|   |             |             |             |
|---|-------------|-------------|-------------|
| H | -5.16279100 | -1.02454800 | 0.97506500  |
| C | -3.90939500 | 0.44871400  | 0.01338900  |
| H | -3.91112400 | 1.15438300  | 0.85370600  |
| H | -3.92000500 | 1.05861700  | -0.89801800 |
| C | -2.62507200 | -0.38596400 | 0.05423600  |
| H | -2.62589000 | -1.09207500 | -0.78635000 |
| H | -2.61991500 | -0.99905400 | 0.96494100  |
| C | -1.34457200 | 0.45525100  | 0.00457400  |
| H | -1.34118100 | 1.15845300  | 0.84750000  |
| H | -1.35174000 | 1.07136700  | -0.90392200 |
| C | -0.05937500 | -0.37968000 | 0.03816600  |
| H | -0.06262600 | -1.08172300 | -0.80575600 |
| H | -0.05296900 | -0.99724100 | 0.94577000  |
| C | 1.22182800  | 0.46067000  | -0.00961800 |
| H | 1.22600500  | 1.16174200  | 0.83510300  |
| H | 1.21489200  | 1.07924600  | -0.91651400 |
| C | 2.50651700  | -0.37513000 | 0.02159100  |
| H | 2.50207100  | -1.07615800 | -0.82316600 |
| H | 2.51328100  | -0.99384500 | 0.92840100  |
| C | 3.78836000  | 0.46429300  | -0.02628500 |
| H | 3.79299300  | 1.16559700  | 0.81827200  |
| H | 3.78191200  | 1.08264300  | -0.93337500 |
| C | 5.07249000  | -0.37199700 | 0.00524900  |
| H | 5.06792500  | -1.07472100 | -0.83832100 |
| H | 5.08065600  | -0.98934400 | 0.91317900  |
| C | 6.35547600  | 0.46557600  | -0.04527500 |
| H | 6.36061900  | 1.16828600  | 0.79690900  |
| H | 6.34843800  | 1.08078700  | -0.95339100 |
| C | 7.63232700  | -0.37951100 | -0.01173500 |
| H | 7.67166800  | -1.07013600 | -0.86015600 |
| H | 8.52819700  | 0.24648200  | -0.05179300 |
| H | 7.68628300  | -0.97816700 | 0.90316900  |

**TS44:  $\text{H} + \text{CH}_3(\text{CH}_2)_{11}\text{CH}_3 \rightarrow \text{H}_2 + \text{CH}_3\text{CH}(\text{CH}_2)_{10}\text{CH}_3$**

|   |            |             |             |
|---|------------|-------------|-------------|
| C | 7.64549400 | -0.39776900 | 0.01809300  |
| H | 7.75341300 | -1.18001200 | -0.74407200 |
| H | 7.68741300 | -0.88665400 | 0.99626200  |
| H | 8.51071800 | 0.26504000  | -0.06566600 |
| C | 6.34681300 | 0.35659200  | -0.16359800 |
| H | 6.35078500 | 1.28014600  | 0.77186100  |
| H | 6.32937500 | 0.97390400  | -1.06615900 |
| C | 5.06699400 | -0.42688700 | 0.04350400  |
| H | 5.07960900 | -0.88305300 | 1.04200900  |

|   |             |             |             |
|---|-------------|-------------|-------------|
| H | 5.05130200  | -1.26862100 | -0.66683500 |
| C | 3.78902400  | 0.40264200  | -0.12858100 |
| H | 3.79190800  | 0.86681900  | -1.12309400 |
| H | 3.79683000  | 1.22807600  | 0.59338400  |
| C | 2.50350200  | -0.41366800 | 0.04421100  |
| H | 2.51343300  | -0.90176200 | 1.02736100  |
| H | 2.48694400  | -1.22391800 | -0.69650800 |
| C | 1.22514900  | 0.42145400  | -0.09026100 |
| H | 1.22870900  | 0.93591500  | -1.06001100 |
| H | 1.22944600  | 1.21150800  | 0.67172300  |
| C | -0.06264200 | -0.39990900 | 0.03915000  |
| H | -0.05473200 | -0.93831900 | 0.99578500  |
| H | -0.07881700 | -1.17078300 | -0.74230100 |
| C | -1.34035500 | 0.44191300  | -0.05473000 |
| H | -1.33625300 | 1.00244700  | -0.99862900 |
| H | -1.33575400 | 1.19445900  | 0.74440300  |
| C | -2.62896500 | -0.38350000 | 0.03540400  |
| H | -2.62532500 | -0.96013200 | 0.96954200  |
| H | -2.64162000 | -1.12222200 | -0.77651400 |
| C | -3.90639300 | 0.46142900  | -0.03077800 |
| H | -3.90269200 | 1.05103500  | -0.95683100 |
| H | -3.90107400 | 1.18879500  | 0.79139000  |
| C | -5.19520000 | -0.36561400 | 0.03504300  |
| H | -5.19668000 | -0.96249500 | 0.95658600  |
| H | -5.20494500 | -1.08690300 | -0.79265700 |
| C | -6.47329500 | 0.47919600  | -0.01920500 |
| H | -6.46972200 | 1.07946300  | -0.93729100 |
| H | -6.46720200 | 1.19550200  | 0.81140000  |
| C | -7.75519900 | -0.35689400 | 0.03826000  |
| H | -7.80439300 | -0.94243700 | 0.96187600  |
| H | -8.64729300 | 0.27444700  | -0.00205500 |
| H | -7.80719500 | -1.05892000 | -0.80006500 |
| H | 6.37426000  | 1.92475900  | 1.49603700  |

**H-R45:  $\text{H} + \text{CH}_3(\text{CH}_2)_{11}\text{CH}_3 \rightarrow \text{H}_2 + \text{CH}_3\text{CH}_2\text{CH}(\text{CH}_2)_9\text{CH}_3$**   
 **$\text{CH}_3\text{CH}_2\text{CH}(\text{CH}_2)_9\text{CH}_3$**

|   |            |             |             |
|---|------------|-------------|-------------|
| C | 7.64846800 | -0.62368200 | 0.20604900  |
| H | 7.74845500 | -1.19330600 | -0.72283700 |
| H | 7.48101000 | -1.33745300 | 1.01759100  |
| H | 8.60070000 | -0.11964100 | 0.39157300  |
| C | 6.49503900 | 0.38178000  | 0.11145200  |
| H | 6.43989700 | 0.97253800  | 1.03745100  |
| H | 6.73007000 | 1.12161400  | -0.67542800 |

|   |             |             |             |
|---|-------------|-------------|-------------|
| C | 5.16639700  | -0.24136700 | -0.16136900 |
| H | 5.14033600  | -1.22486300 | -0.62509400 |
| C | 3.90089700  | 0.54691900  | -0.09337500 |
| H | 3.85310200  | 1.25445300  | -0.94238500 |
| H | 3.91270100  | 1.18753500  | 0.80093800  |
| C | 2.62537300  | -0.30780200 | -0.09681800 |
| H | 2.65056400  | -0.99098300 | 0.76062500  |
| H | 2.62219300  | -0.94169900 | -0.99257800 |
| C | 1.33483300  | 0.51720600  | -0.05510800 |
| H | 1.31388700  | 1.20075000  | -0.91392600 |
| H | 1.34084500  | 1.15415300  | 0.83904200  |
| C | 0.06168000  | -0.33649900 | -0.05776800 |
| H | 0.08315600  | -1.02011500 | 0.80081500  |
| H | 0.05564300  | -0.97341900 | -0.95186300 |
| C | -1.23107900 | 0.48629100  | -0.01545300 |
| H | -1.25233100 | 1.17062800  | -0.87355600 |
| H | -1.22571200 | 1.12245300  | 0.87920000  |
| C | -2.50358000 | -0.36847200 | -0.01968500 |
| H | -2.48184500 | -1.05325100 | 0.83803300  |
| H | -2.50877600 | -1.00430600 | -0.91456700 |
| C | -3.79720700 | 0.45294000  | 0.02327800  |
| H | -3.81864500 | 1.13864300  | -0.83375900 |
| H | -3.79291300 | 1.08771300  | 0.91895600  |
| C | -5.06898700 | -0.40254400 | 0.01703900  |
| H | -5.04774500 | -1.08953200 | 0.87322900  |
| H | -5.07474600 | -1.03654700 | -0.87934600 |
| C | -6.36389900 | 0.41679200  | 0.06208700  |
| H | -6.38576900 | 1.10364000  | -0.79284600 |
| H | -6.35927500 | 1.04880700  | 0.95860100  |
| C | -7.62813500 | -0.44765000 | 0.05407100  |
| H | -7.65087200 | -1.12267300 | 0.91555500  |
| H | -8.53299200 | 0.16558200  | 0.08919800  |
| H | -7.67973300 | -1.06418900 | -0.84900600 |

**TS45: H + CH<sub>3</sub>(CH<sub>2</sub>)<sub>11</sub>CH<sub>3</sub> → H<sub>2</sub> + CH<sub>3</sub>CH<sub>2</sub>CH(CH<sub>2</sub>)<sub>9</sub>CH<sub>3</sub>**

|   |             |             |             |
|---|-------------|-------------|-------------|
| C | -7.62835500 | 0.38547000  | -0.14555600 |
| H | -7.64819100 | 0.82189700  | -1.14895900 |
| H | -7.65894000 | 1.20739200  | 0.57519200  |
| H | -8.54122700 | -0.20282400 | -0.02060000 |
| C | -6.38029600 | -0.47932200 | 0.05509700  |
| H | -6.40342600 | -0.94070800 | 1.04999100  |
| H | -6.39633800 | -1.31508800 | -0.66035200 |
| C | -5.07875400 | 0.27822200  | -0.11293500 |



|   |             |             |             |
|---|-------------|-------------|-------------|
| H | -5.07593600 | 1.16986400  | 0.85831200  |
| H | -5.06915200 | 0.92388000  | -0.99681200 |
| C | -3.79659300 | -0.50906100 | 0.06225200  |
| H | -3.77832100 | -1.32126400 | -0.68129300 |
| H | -3.80527200 | -1.00443500 | 1.04180700  |
| C | -2.52091500 | 0.33049400  | -0.07814800 |
| H | -2.52652000 | 1.12201900  | 0.68070700  |
| H | -2.52932000 | 0.83930200  | -1.05054500 |
| C | -1.23369000 | -0.49126000 | 0.05109600  |
| H | -1.22090600 | -1.26776700 | -0.72493300 |
| H | -1.23774200 | -1.02248800 | 1.01168400  |
| C | 0.04367900  | 0.34961900  | -0.05390500 |
| H | 0.04218300  | 1.10789800  | 0.73964900  |
| H | 0.03627400  | 0.90303000  | -1.00194900 |
| C | 1.33193900  | -0.47620100 | 0.03754600  |
| H | 1.34158300  | -1.22029400 | -0.76952100 |
| H | 1.33074800  | -1.04655000 | 0.97553300  |
| C | 2.60966400  | 0.36740900  | -0.03794800 |
| H | 2.60757900  | 1.09939900  | 0.78004700  |
| H | 2.60333800  | 0.95171600  | -0.96729500 |
| C | 3.89811300  | -0.46058700 | 0.02844500  |
| H | 3.90534100  | -1.18406900 | -0.79718300 |
| H | 3.89939600  | -1.05454000 | 0.95171400  |
| C | 5.17576800  | 0.38415200  | -0.02954800 |
| H | 5.17254700  | 1.10275000  | 0.80050100  |
| H | 5.17252200  | 0.98405800  | -0.94912500 |
| C | 6.46509300  | -0.44327500 | 0.02674100  |
| H | 6.47118700  | -1.15801000 | -0.80525800 |
| H | 6.46707500  | -1.04531300 | 0.94367100  |
| C | 7.73557100  | 0.41041200  | -0.02546000 |
| H | 7.77517900  | 1.11191500  | 0.81395300  |
| H | 8.63613400  | -0.20865500 | 0.01687400  |
| H | 7.77962300  | 0.99785700  | -0.94813100 |
| H | -5.07676800 | 1.77260200  | 1.61625900  |

**H-R46:  $\text{H} + \text{CH}_3(\text{CH}_2)_{11}\text{CH}_3 \rightarrow \text{H}_2 + \text{CH}_3(\text{CH}_2)_2\text{CH}(\text{CH}_2)_8\text{CH}_3$**   
 **$\text{CH}_3(\text{CH}_2)_2\text{CH}(\text{CH}_2)_8\text{CH}_3$**

|   |            |             |             |
|---|------------|-------------|-------------|
| C | 7.71891700 | -0.10691700 | 0.31672000  |
| H | 7.96170000 | -0.73645400 | -0.54538100 |
| H | 7.71770000 | -0.74864500 | 1.20363700  |
| H | 8.52736100 | 0.61983800  | 0.43493800  |
| C | 6.36665300 | 0.58658000  | 0.13318600  |
| H | 6.16424100 | 1.23501500  | 0.99299700  |

|   |             |             |             |
|---|-------------|-------------|-------------|
| H | 6.40751300  | 1.24411700  | -0.74325900 |
| C | 5.19999500  | -0.39739200 | -0.03553300 |
| H | 5.15200400  | -1.06331100 | 0.83921300  |
| H | 5.42764300  | -1.06949200 | -0.88437500 |
| C | 3.87331300  | 0.25367300  | -0.24363900 |
| H | 3.84937500  | 1.25756100  | -0.66152000 |
| C | 2.59893500  | -0.52087700 | -0.18160800 |
| H | 2.61508200  | -1.18871800 | 0.69259500  |
| H | 2.53055300  | -1.20195400 | -1.05063800 |
| C | 1.33457400  | 0.34906400  | -0.14078100 |
| H | 1.32581400  | 1.00833300  | -1.01798100 |
| H | 1.38153500  | 1.00708900  | 0.73528200  |
| C | 0.03422600  | -0.46050800 | -0.10230300 |
| H | 0.04507100  | -1.12194600 | 0.77382500  |
| H | -0.00816000 | -1.11976700 | -0.97916200 |
| C | -1.22761000 | 0.40891900  | -0.06241900 |
| H | -1.23839100 | 1.07026300  | -0.93854500 |
| H | -1.18473100 | 1.06832500  | 0.81414600  |
| C | -2.53022900 | -0.39829800 | -0.02335400 |
| H | -2.52029800 | -1.05873200 | 0.85346900  |
| H | -2.57265700 | -1.05859400 | -0.89934300 |
| C | -3.79155700 | 0.47208800  | 0.01440400  |
| H | -3.80079400 | 1.13307000  | -0.86205400 |
| H | -3.74939200 | 1.13194700  | 0.89076400  |
| C | -5.09475100 | -0.33386300 | 0.05219500  |
| H | -5.08685500 | -0.99501300 | 0.92871900  |
| H | -5.13802500 | -0.99390700 | -0.82415700 |
| C | -6.35645400 | 0.53606800  | 0.08973800  |
| H | -6.36474100 | 1.19675200  | -0.78580300 |
| H | -6.31415200 | 1.19459500  | 0.96594400  |
| C | -7.65316900 | -0.27804900 | 0.12649300  |
| H | -7.68885600 | -0.92503100 | 1.00882200  |
| H | -8.53285100 | 0.37109100  | 0.15541900  |
| H | -7.74275100 | -0.91935500 | -0.75613600 |

**TS46:  $\text{H} + \text{CH}_3(\text{CH}_2)_{11}\text{CH}_3 \rightarrow \text{H}_2 + \text{CH}_3(\text{CH}_2)_2\text{CH}(\text{CH}_2)_8\text{CH}_3$**

|   |             |             |             |
|---|-------------|-------------|-------------|
| C | -7.66388800 | -0.34659900 | 0.03492900  |
| H | -7.73070800 | -0.76124100 | 1.04569200  |
| H | -7.72938600 | -1.18190000 | -0.66972700 |
| H | -8.54025400 | 0.28832400  | -0.12108800 |
| C | -6.36444300 | 0.44038900  | -0.15498800 |
| H | -6.34263600 | 0.87444700  | -1.16182600 |
| H | -6.34212000 | 1.28517800  | 0.54258900  |

|   |             |             |             |
|---|-------------|-------------|-------------|
| C | -5.10749400 | -0.41380000 | 0.04977200  |
| H | -5.12458100 | -1.25604000 | -0.65965700 |
| H | -5.13081500 | -0.86853400 | 1.04887300  |
| C | -3.80817800 | 0.34547700  | -0.12429600 |
| H | -3.80167500 | 1.23729400  | 0.84599100  |
| H | -3.80179100 | 0.99046600  | -1.00857200 |
| C | -2.52396100 | -0.43977200 | 0.04678500  |
| H | -2.50390500 | -1.24813100 | -0.70083500 |
| H | -2.53120500 | -0.94003000 | 1.02382400  |
| C | -1.25042900 | 0.40374400  | -0.08940800 |
| H | -1.25810500 | 1.19106700  | 0.67376900  |
| H | -1.26018100 | 0.91786400  | -1.05900500 |
| C | 0.03900400  | -0.41520600 | 0.03556000  |
| H | 0.05520900  | -1.18606100 | -0.74600400 |
| H | 0.03524200  | -0.95331600 | 0.99231400  |
| C | 1.31394700  | 0.43033300  | -0.06144500 |
| H | 1.30813600  | 1.18374700  | 0.73670400  |
| H | 1.30698800  | 0.98948600  | -1.00612000 |
| C | 2.60461300  | -0.39190000 | 0.02817600  |
| H | 2.61815800  | -1.13181800 | -0.78265000 |
| H | 2.60344700  | -0.96704000 | 0.96322300  |
| C | 3.87989900  | 0.45602100  | -0.04065200 |
| H | 3.87328700  | 1.18507200  | 0.77997500  |
| H | 3.87428600  | 1.04360900  | -0.96796800 |
| C | 5.17058600  | -0.36799800 | 0.02628500  |
| H | 5.18160800  | -1.09103200 | -0.79988300 |
| H | 5.17379400  | -0.96288400 | 0.94911000  |
| C | 6.44675600  | 0.47955500  | -0.03027400 |
| H | 6.43925700  | 1.19776100  | 0.79866700  |
| H | 6.44163600  | 1.07766300  | -0.94975900 |
| C | 7.73050600  | -0.35357500 | 0.02886300  |
| H | 7.78386100  | -1.05752000 | -0.80777100 |
| H | 8.62117700  | 0.27964700  | -0.01321000 |
| H | 7.78124100  | -0.93675100 | 0.95389300  |
| H | -3.80147900 | 1.84066100  | 1.60359400  |

**H-R47:  $\text{H} + \text{CH}_3(\text{CH}_2)_{11}\text{CH}_3 \rightarrow \text{H}_2 + \text{CH}_3(\text{CH}_2)_3\text{CH}(\text{CH}_2)_7\text{CH}_3$**   
 **$\text{CH}_3(\text{CH}_2)_3\text{CH}(\text{CH}_2)_7\text{CH}_3$**

|   |            |             |             |
|---|------------|-------------|-------------|
| C | 7.57907700 | -0.79398300 | 0.25312600  |
| H | 7.71579800 | -1.13645400 | -0.77758200 |
| H | 7.40248500 | -1.67827400 | 0.87361900  |
| H | 8.51973100 | -0.34197500 | 0.57995500  |
| C | 6.41566300 | 0.19644700  | 0.35762500  |

|   |             |             |             |
|---|-------------|-------------|-------------|
| H | 6.32619200  | 0.54516400  | 1.39380400  |
| H | 6.63877200  | 1.08643400  | -0.24365800 |
| C | 5.07574200  | -0.39483400 | -0.09234900 |
| H | 4.85019700  | -1.28450300 | 0.50833100  |
| H | 5.16291400  | -0.74128700 | -1.13007500 |
| C | 3.90247400  | 0.58952700  | 0.01111500  |
| H | 4.14423300  | 1.49059100  | -0.58352800 |
| H | 3.81885300  | 0.95507700  | 1.04554200  |
| C | 2.59072700  | 0.02711900  | -0.42616300 |
| H | 2.59177200  | -0.79942800 | -1.13333300 |
| C | 1.30282100  | 0.73779500  | -0.17265100 |
| H | 1.19265100  | 1.58321800  | -0.87761200 |
| H | 1.32932400  | 1.20461200  | 0.82238200  |
| C | 0.05883900  | -0.15635800 | -0.28803200 |
| H | 0.14105700  | -0.97621900 | 0.43552000  |
| H | 0.04556400  | -0.62492000 | -1.28025300 |
| C | -1.25791800 | 0.59425400  | -0.06317900 |
| H | -1.34491300 | 1.40361000  | -0.79976000 |
| H | -1.23342300 | 1.08106900  | 0.92055000  |
| C | -2.49711000 | -0.30410800 | -0.14898900 |
| H | -2.40945300 | -1.11036200 | 0.59072900  |
| H | -2.52125500 | -0.79503800 | -1.13056000 |
| C | -3.81627600 | 0.44420700  | 0.07407700  |
| H | -3.91057700 | 1.24281200  | -0.67321300 |
| H | -3.78683400 | 0.94502500  | 1.05056300  |
| C | -5.05344000 | -0.45834300 | 0.00793200  |
| H | -4.96028700 | -1.25506700 | 0.75756800  |
| H | -5.08319400 | -0.96234600 | -0.96704600 |
| C | -6.37387900 | 0.28844100  | 0.22865800  |
| H | -6.47094800 | 1.07979000  | -0.52467300 |
| H | -6.34223500 | 0.79695600  | 1.20005600  |
| C | -7.60278400 | -0.62382800 | 0.17124500  |
| H | -7.55245600 | -1.40308900 | 0.93834000  |
| H | -8.52701700 | -0.06114900 | 0.33012600  |
| H | -7.68056700 | -1.12226000 | -0.80028900 |

**TS47:  $\text{H} + \text{CH}_3(\text{CH}_2)_{11}\text{CH}_3 \rightarrow \text{H}_2 + \text{CH}_3(\text{CH}_2)_3\text{CH}(\text{CH}_2)_7\text{CH}_3$**

|   |             |             |             |
|---|-------------|-------------|-------------|
| C | -7.65218600 | 0.43118300  | -0.10349700 |
| H | -7.68581200 | 0.88468900  | -1.09924200 |
| H | -7.67692000 | 1.24345900  | 0.62976800  |
| H | -8.56460500 | -0.15807700 | 0.02342300  |
| C | -6.39970600 | -0.43283800 | 0.06911900  |
| H | -6.41299900 | -0.90061800 | 1.06104500  |

|   |             |             |             |
|---|-------------|-------------|-------------|
| H | -6.42212100 | -1.25639700 | -0.65529100 |
| C | -5.09481800 | 0.35316900  | -0.09866300 |
| H | -5.06648000 | 1.16925300  | 0.63357900  |
| H | -5.08386700 | 0.82954300  | -1.08753300 |
| C | -3.83703400 | -0.50957000 | 0.05837200  |
| H | -3.85806400 | -1.31834900 | -0.68860500 |
| H | -3.85227600 | -1.00912900 | 1.03585500  |
| C | -2.53914900 | 0.25788700  | -0.09012300 |
| H | -2.52683900 | 1.10551000  | 0.91888800  |
| H | -2.53857100 | 0.94123800  | -0.94506000 |
| C | -1.25313300 | -0.53247300 | 0.03927800  |
| H | -1.23725300 | -1.30951600 | -0.74085500 |
| H | -1.25295500 | -1.07215000 | 0.99517000  |
| C | 0.01824700  | 0.31809300  | -0.07125600 |
| H | 0.00957800  | 1.08042800  | 0.71681800  |
| H | 0.00591300  | 0.86301200  | -1.02386200 |
| C | 1.31007000  | -0.50081400 | 0.02656400  |
| H | 1.32411900  | -1.25249100 | -0.77347100 |
| H | 1.31244400  | -1.06179000 | 0.97010200  |
| C | 2.58223900  | 0.35034400  | -0.05670800 |
| H | 2.57275400  | 1.09246300  | 0.75191300  |
| H | 2.57438700  | 0.92269100  | -0.99343200 |
| C | 3.87599100  | -0.46800900 | 0.02381300  |
| H | 3.89071000  | -1.20225100 | -0.79217000 |
| H | 3.87880900  | -1.04953800 | 0.95493200  |
| C | 5.14767900  | 0.38515800  | -0.04166400 |
| H | 5.13567900  | 1.11579600  | 0.77769000  |
| H | 5.14379600  | 0.97142100  | -0.96998800 |
| C | 6.44280400  | -0.43172100 | 0.03213700  |
| H | 6.45779600  | -1.15875200 | -0.78903500 |
| H | 6.44545200  | -1.01990100 | 0.95800900  |
| C | 7.70706000  | 0.43067000  | -0.02761100 |
| H | 7.73777300  | 1.14498100  | 0.80129100  |
| H | 8.61201500  | -0.18089300 | 0.02787000  |
| H | 7.75073500  | 1.00446100  | -0.95884900 |
| H | -2.52157600 | 1.67443200  | 1.70247400  |

**H-R48:  $\text{H} + \text{CH}_3(\text{CH}_2)_{11}\text{CH}_3 \rightarrow \text{H}_2 + \text{CH}_3(\text{CH}_2)_4\text{CH}(\text{CH}_2)_6\text{CH}_3$**   
 **$\text{CH}_3(\text{CH}_2)_4\text{CH}(\text{CH}_2)_6\text{CH}_3$**

|   |            |             |             |
|---|------------|-------------|-------------|
| C | 7.69904300 | -0.11580500 | 0.24635700  |
| H | 7.86207900 | -0.81185900 | -0.58267300 |
| H | 7.72997100 | -0.69563100 | 1.17434900  |
| H | 8.54071400 | 0.58227000  | 0.26341300  |

|   |             |             |             |
|---|-------------|-------------|-------------|
| C | 6.36406600  | 0.61973700  | 0.09741100  |
| H | 6.24765600  | 1.33511600  | 0.92071900  |
| H | 6.37680800  | 1.21639600  | -0.82290400 |
| C | 5.15312600  | -0.31976100 | 0.07126400  |
| H | 5.14022400  | -0.91669700 | 0.99270100  |
| H | 5.27103100  | -1.03669700 | -0.75205100 |
| C | 3.81397800  | 0.40888400  | -0.07953600 |
| H | 3.82759700  | 1.00576600  | -1.00026800 |
| H | 3.69090500  | 1.12174900  | 0.74488200  |
| C | 2.60258800  | -0.53281900 | -0.11228100 |
| H | 2.58388600  | -1.14069700 | 0.80538300  |
| H | 2.74613200  | -1.26729400 | -0.92670800 |
| C | 1.29117000  | 0.15974700  | -0.28105700 |
| H | 1.28320000  | 1.16606400  | -0.69298100 |
| C | -0.00263400 | -0.57650800 | -0.17252400 |
| H | 0.01553600  | -1.22778700 | 0.71438900  |
| H | -0.10974500 | -1.27267700 | -1.02547400 |
| C | -1.24108500 | 0.32893600  | -0.11985500 |
| H | -1.24720700 | 0.97773500  | -1.00484600 |
| H | -1.16027700 | 0.99574100  | 0.74710300  |
| C | -2.56253200 | -0.44348400 | -0.04959100 |
| H | -2.55494800 | -1.09584400 | 0.83333000  |
| H | -2.63803900 | -1.11044800 | -0.91839000 |
| C | -3.79922800 | 0.46073500  | 0.00153200  |
| H | -3.80298100 | 1.11759300  | -0.87804400 |
| H | -3.72715100 | 1.12322700  | 0.87389400  |
| C | -5.12286300 | -0.30984700 | 0.06096100  |
| H | -5.12065800 | -0.96750700 | 0.94012300  |
| H | -5.19580700 | -0.97192400 | -0.81191100 |
| C | -6.36006100 | 0.59386000  | 0.11165700  |
| H | -6.36128900 | 1.25249200  | -0.76545700 |
| H | -6.28938900 | 1.25305000  | 0.98553800  |
| C | -7.67777700 | -0.18474300 | 0.16637300  |
| H | -7.71971800 | -0.82945500 | 1.05008600  |
| H | -8.53901500 | 0.48814400  | 0.20557100  |
| H | -7.79626700 | -0.82441500 | -0.71404200 |

**TS48:  $\text{H} + \text{CH}_3(\text{CH}_2)_{11}\text{CH}_3 \rightarrow \text{H}_2 + \text{CH}_3(\text{CH}_2)_4\text{CH}(\text{CH}_2)_6\text{CH}_3$**

|   |             |             |             |
|---|-------------|-------------|-------------|
| C | -7.68604900 | -0.31618100 | 0.06854600  |
| H | -7.74003800 | -0.75160400 | 1.07141600  |
| H | -7.75809800 | -1.13753200 | -0.65165400 |
| H | -8.56587400 | 0.31948600  | -0.06457800 |
| C | -6.38918600 | 0.47575100  | -0.12139600 |

|   |             |             |             |
|---|-------------|-------------|-------------|
| H | -6.38202600 | 0.93119900  | -1.11922300 |
| H | -6.36241600 | 1.30830700  | 0.59211700  |
| C | -5.12702400 | -0.37666400 | 0.05186300  |
| H | -5.14911900 | -1.20386300 | -0.67002300 |
| H | -5.14009600 | -0.84184000 | 1.04617900  |
| C | -3.82493600 | 0.41288100  | -0.11880400 |
| H | -3.79558600 | 1.22759900  | 0.61471800  |
| H | -3.81654300 | 0.89065800  | -1.10687900 |
| C | -2.56449200 | -0.44716800 | 0.03375900  |
| H | -2.58100400 | -1.24982800 | -0.71980900 |
| H | -2.57989200 | -0.95474000 | 1.00707900  |
| C | -1.26934700 | 0.32670000  | -0.10522900 |
| H | -1.26205500 | 1.16297600  | 0.91298700  |
| H | -1.27032200 | 1.01932700  | -0.95267200 |
| C | 0.01992100  | -0.45941100 | 0.01763400  |
| H | 0.04204600  | -1.22580400 | -0.77278600 |
| H | 0.01974200  | -1.01177400 | 0.96624300  |
| C | 1.28742600  | 0.39885900  | -0.07744600 |
| H | 1.27199400  | 1.15101100  | 0.72022400  |
| H | 1.27572700  | 0.95581300  | -1.02307900 |
| C | 2.58307300  | -0.41461200 | 0.01479400  |
| H | 2.60330000  | -1.15703300 | -0.79368800 |
| H | 2.58561200  | -0.98627400 | 0.95188200  |
| C | 3.85113800  | 0.44389700  | -0.05523800 |
| H | 3.83496500  | 1.17790400  | 0.76067900  |
| H | 3.84363900  | 1.02544700  | -0.98631600 |
| C | 5.14866000  | -0.36836100 | 0.02174100  |
| H | 5.16918100  | -1.09716200 | -0.79917000 |
| H | 5.15397300  | -0.95640500 | 0.94890500  |
| C | 6.41714100  | 0.49056700  | -0.03640700 |
| H | 6.39915800  | 1.21551500  | 0.78643800  |
| H | 6.41053900  | 1.08087900  | -0.96089900 |
| C | 7.70834100  | -0.32990100 | 0.03550600  |
| H | 7.77216700  | -1.04058100 | -0.79468500 |
| H | 8.59311000  | 0.31140700  | -0.00821900 |
| H | 7.76053800  | -0.90442400 | 0.96584300  |
| H | -1.26061700 | 1.72319000  | 1.70303200  |

**H-R49:  $\text{H} + \text{CH}_3(\text{CH}_2)_{11}\text{CH}_3 \rightarrow \text{H}_2 + \text{CH}_3(\text{CH}_2)_5\text{CH}(\text{CH}_2)_5\text{CH}_3$**   
 **$\text{CH}_3(\text{CH}_2)_5\text{CH}(\text{CH}_2)_5\text{CH}_3$**

|   |            |            |             |
|---|------------|------------|-------------|
| C | 7.54733400 | 0.84722100 | -0.19186900 |
| H | 7.66413900 | 1.11755600 | 0.86248400  |
| H | 7.40147100 | 1.77418200 | -0.75555100 |

|   |             |             |             |
|---|-------------|-------------|-------------|
| H | 8.48806800  | 0.40058400  | -0.52590400 |
| C | 6.36986600  | -0.11192400 | -0.39023800 |
| H | 6.29873700  | -0.38759300 | -1.44953600 |
| H | 6.56356400  | -1.04477000 | 0.15338300  |
| C | 5.02890300  | 0.47115100  | 0.06947600  |
| H | 4.83950000  | 1.40773100  | -0.47124000 |
| H | 5.09899500  | 0.74350400  | 1.13079300  |
| C | 3.84130800  | -0.47659600 | -0.13242400 |
| H | 4.02748200  | -1.41185700 | 0.41162300  |
| H | 3.77549600  | -0.75092800 | -1.19344800 |
| C | 2.50283300  | 0.11617200  | 0.31977700  |
| H | 2.31870300  | 1.05421700  | -0.21764000 |
| H | 2.56264400  | 0.38035700  | 1.38317000  |
| C | 1.30716600  | -0.82378400 | 0.10369300  |
| H | 1.50687100  | -1.77364200 | 0.63455200  |
| H | 1.24636600  | -1.10408300 | -0.95778000 |
| C | 0.00000000  | -0.25452700 | 0.54569800  |
| H | 0.00000100  | 0.44979600  | 1.37493300  |
| C | -1.30716700 | -0.82378800 | 0.10370100  |
| H | -1.50687300 | -1.77363800 | 0.63457200  |
| H | -1.24636900 | -1.10410000 | -0.95776900 |
| C | -2.50283200 | 0.11617200  | 0.31977600  |
| H | -2.31870200 | 1.05421100  | -0.21765400 |
| H | -2.56264100 | 0.38037100  | 1.38316500  |
| C | -3.84130900 | -0.47659900 | -0.13241700 |
| H | -4.02748300 | -1.41185300 | 0.41164200  |
| H | -3.77549800 | -0.75094400 | -1.19343800 |
| C | -5.02890200 | 0.47115200  | 0.06947400  |
| H | -4.83949800 | 1.40772500  | -0.47125300 |
| H | -5.09899300 | 0.74351700  | 1.13078800  |
| C | -6.36986600 | -0.11192600 | -0.39023400 |
| H | -6.56356600 | -1.04476600 | 0.15339800  |
| H | -6.29873800 | -0.38760600 | -1.44952900 |
| C | -7.54733300 | 0.84722400  | -0.19187500 |
| H | -7.40146800 | 1.77417800  | -0.75556700 |
| H | -8.48806800 | 0.40058500  | -0.52590500 |
| H | -7.66413700 | 1.11757000  | 0.86247500  |

**TS49:  $\text{H} + \text{CH}_3(\text{CH}_2)_{11}\text{CH}_3 \rightarrow \text{H}_2 + \text{CH}_3(\text{CH}_2)_5\text{CH}(\text{CH}_2)_5\text{CH}_3$**

|   |            |             |             |
|---|------------|-------------|-------------|
| C | 7.67839600 | -0.44664500 | -0.06006000 |
| H | 7.72278300 | -0.91952900 | -1.04635200 |
| H | 7.69944800 | -1.24449900 | 0.68911600  |
| H | 8.58771600 | 0.14819900  | 0.06360200  |



|   |             |             |             |
|---|-------------|-------------|-------------|
| C | 6.42092400  | 0.41556200  | 0.08412800  |
| H | 6.42311900  | 0.90264100  | 1.06690600  |
| H | 6.44732000  | 1.22514900  | -0.65558700 |
| C | 5.11949300  | -0.37720000 | -0.08150100 |
| H | 5.09198000  | -1.18404300 | 0.66246900  |
| H | 5.11970200  | -0.86997000 | -1.06263900 |
| C | 3.85532600  | 0.47872300  | 0.05432300  |
| H | 3.87790500  | 1.27853700  | -0.69749300 |
| H | 3.86160000  | 0.97999200  | 1.03087000  |
| C | 2.55585600  | -0.32017600 | -0.09342900 |
| H | 2.52720300  | -1.11070600 | 0.66599800  |
| H | 2.55109500  | -0.82969800 | -1.06550100 |
| C | 1.29244100  | 0.54045300  | 0.02908500  |
| H | 1.31080000  | 1.32232700  | -0.74599100 |
| H | 1.30152000  | 1.07414000  | 0.98839700  |
| C | 0.00012800  | -0.24044500 | -0.09600800 |
| H | -0.00398900 | -1.05975900 | 0.93603400  |
| H | 0.00336600  | -0.94679100 | -0.93203300 |
| C | -1.29237800 | 0.54204400  | 0.01587300  |
| H | -1.31483200 | 1.30275800  | -0.77995800 |
| H | -1.29762900 | 1.10108000  | 0.96058900  |
| C | -2.55588500 | -0.32227100 | -0.07739000 |
| H | -2.53439900 | -1.07603000 | 0.71863400  |
| H | -2.54394300 | -0.87713000 | -1.02424300 |
| C | -3.85560100 | 0.48398600  | 0.02083400  |
| H | -3.87977800 | 1.23283900  | -0.78162300 |
| H | -3.86095600 | 1.04793400  | 0.96260500  |
| C | -5.11906400 | -0.38031700 | -0.05609000 |
| H | -5.09571000 | -1.12671700 | 0.74852800  |
| H | -5.11378200 | -0.94789900 | -0.99592000 |
| C | -6.42162900 | 0.42221600  | 0.03997400  |
| H | -6.44808600 | 1.16517600  | -0.76653200 |
| H | -6.42543200 | 0.99175300  | 0.97740200  |
| C | -7.67748300 | -0.45154900 | -0.03064400 |
| H | -7.69674400 | -1.18234300 | 0.78406500  |
| H | -8.58809700 | 0.14974300  | 0.04152900  |
| H | -7.72034400 | -1.00714700 | -0.97287800 |
| H | -0.00497600 | -1.60630400 | 1.73543800  |

#### 2.1.14 C14 (*n*-C<sub>14</sub>H<sub>30</sub>)

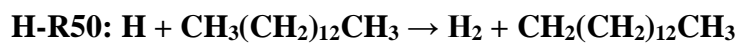

*n*-C<sub>14</sub>H<sub>30</sub>

|   |             |            |            |
|---|-------------|------------|------------|
| C | -8.33887800 | 0.32393900 | 0.00001500 |
|---|-------------|------------|------------|

|   |             |             |             |
|---|-------------|-------------|-------------|
| H | -8.39288300 | 0.96900900  | -0.88284300 |
| H | -8.39286200 | 0.96882300  | 0.88301100  |
| H | -9.22768300 | -0.31341800 | -0.00004100 |
| C | -7.05242900 | -0.50726000 | -0.00008800 |
| H | -7.04400100 | -1.16717600 | 0.87610700  |
| H | -7.04402300 | -1.16699300 | -0.87642100 |
| C | -5.77895700 | 0.34615700  | -0.00001500 |
| H | -5.78815700 | 1.00692000  | 0.87686300  |
| H | -5.78814700 | 1.00706300  | -0.87678600 |
| C | -4.48545200 | -0.47619200 | -0.00007600 |
| H | -4.47722900 | -1.13672900 | -0.87695600 |
| H | -4.47724400 | -1.13687300 | 0.87669500  |
| C | -3.21291400 | 0.37858800  | 0.00000900  |
| H | -3.22126700 | 1.03916700  | 0.87682400  |
| H | -3.22121400 | 1.03925800  | -0.87673900 |
| C | -1.91923300 | -0.44381300 | 0.00001100  |
| H | -1.91086400 | -1.10440500 | -0.87680500 |
| H | -1.91090000 | -1.10446300 | 0.87678400  |
| C | -0.64686400 | 0.41115500  | 0.00006600  |
| H | -0.65526900 | 1.07176800  | 0.87686700  |
| H | -0.65521400 | 1.07179100  | -0.87671800 |
| C | 0.64686400  | -0.41115400 | 0.00009200  |
| H | 0.65524000  | -1.07180700 | -0.87667900 |
| H | 0.65524300  | -1.07175100 | 0.87690700  |
| C | 1.91923300  | 0.44381300  | 0.00006000  |
| H | 1.91088200  | 1.10447000  | 0.87682700  |
| H | 1.91088200  | 1.10439800  | -0.87676200 |
| C | 3.21291400  | -0.37858800 | 0.00009200  |
| H | 3.22121700  | -1.03928400 | -0.87663500 |
| H | 3.22126400  | -1.03914100 | 0.87692700  |
| C | 4.48545200  | 0.47619200  | -0.00001500 |
| H | 4.47725800  | 1.13688200  | 0.87675100  |
| H | 4.47721600  | 1.13672100  | -0.87690100 |
| C | 5.77895700  | -0.34615700 | 0.00002800  |
| H | 5.78811900  | -1.00709100 | -0.87672100 |
| H | 5.78818500  | -1.00689200 | 0.87692700  |
| C | 7.05242900  | 0.50726000  | -0.00011700 |
| H | 7.04404100  | 1.16719100  | 0.87606800  |
| H | 7.04398400  | 1.16697800  | -0.87646000 |
| C | 8.33887800  | -0.32394000 | -0.00005800 |
| H | 8.39284600  | -0.96901900 | -0.88291200 |
| H | 9.22768300  | 0.31341700  | -0.00015800 |
| H | 8.39289800  | -0.96881300 | 0.88294300  |

**CH<sub>2</sub>(CH<sub>2</sub>)<sub>12</sub>CH<sub>3</sub>**

|   |             |             |             |
|---|-------------|-------------|-------------|
| C | -8.38989800 | 0.30209400  | -0.00007700 |
| H | -8.42302000 | 1.29382800  | 0.43708800  |
| H | -9.32672600 | -0.13989900 | -0.31738200 |
| C | -7.12765300 | -0.48825700 | -0.00042800 |
| H | -7.09461500 | -1.13903100 | 0.89241900  |
| H | -7.12321700 | -1.18217300 | -0.85156900 |
| C | -5.85215700 | 0.36831700  | -0.02248800 |
| H | -5.86784500 | 1.05340300  | 0.83461800  |
| H | -5.86111500 | 0.99973500  | -0.91892300 |
| C | -4.56190000 | -0.45748900 | 0.00923800  |
| H | -4.55138400 | -1.14484800 | -0.84667100 |
| H | -4.55853700 | -1.09034600 | 0.90631700  |
| C | -3.28802100 | 0.39485700  | -0.01284300 |
| H | -3.29635400 | 1.07967700  | 0.84502800  |
| H | -3.29380200 | 1.03036700  | -0.90784300 |
| C | -1.99629800 | -0.43028200 | 0.01196800  |
| H | -1.98805300 | -1.11421400 | -0.84666100 |
| H | -1.99084800 | -1.06691000 | 0.90628300  |
| C | -0.72205600 | 0.42164000  | -0.00915600 |
| H | -0.72918900 | 1.10417400  | 0.85059700  |
| H | -0.72863800 | 1.05977600  | -0.90238400 |
| C | 0.56962800  | -0.40362300 | 0.01204600  |
| H | 0.57664300  | -1.08585800 | -0.84796000 |
| H | 0.57609700  | -1.04213900 | 0.90502300  |
| C | 1.84413800  | 0.44791500  | -0.00892800 |
| H | 1.83768800  | 1.12959200  | 0.85152200  |
| H | 1.83727200  | 1.08699500  | -0.90149500 |
| C | 3.13561500  | -0.37771000 | 0.01079500  |
| H | 3.14179300  | -1.05953800 | -0.84953400 |
| H | 3.14258600  | -1.01666900 | 0.90344500  |
| C | 4.41043400  | 0.47339500  | -0.01073100 |
| H | 4.40441300  | 1.15535800  | 0.84952400  |
| H | 4.40359400  | 1.11218000  | -0.90354000 |
| C | 5.70163000  | -0.35230000 | 0.00902600  |
| H | 5.70815100  | -1.03519900 | -0.85066800 |
| H | 5.70995600  | -0.99058100 | 0.90235600  |
| C | 6.97738400  | 0.49742800  | -0.01410500 |
| H | 6.97146300  | 1.17988700  | 0.84457900  |
| H | 6.97001300  | 1.13406800  | -0.90731500 |
| C | 8.26152200  | -0.33695100 | 0.00676100  |
| H | 8.31240600  | -1.00591000 | -0.85824500 |
| H | 9.15195600  | 0.29773800  | -0.01193800 |

|   |            |             |            |
|---|------------|-------------|------------|
| H | 8.31510200 | -0.95766000 | 0.90686700 |
|---|------------|-------------|------------|

**TS50:  $\text{H} + \text{CH}_3(\text{CH}_2)_{12}\text{CH}_3 \rightarrow \text{H}_2 + \text{CH}_2(\text{CH}_2)_{12}\text{CH}_3$**

|   |             |             |             |
|---|-------------|-------------|-------------|
| C | 8.25325400  | 0.22478700  | -0.17429500 |
| H | 8.33979100  | 1.11527300  | 0.85855500  |
| H | 8.28426300  | 0.88377400  | -1.04267600 |
| H | 9.17738700  | -0.33855700 | -0.04790100 |
| C | 6.97382200  | -0.55348700 | 0.01539800  |
| H | 6.93735300  | -1.36427800 | -0.72852900 |
| H | 6.98838800  | -1.05159500 | 0.99273400  |
| C | 5.70517800  | 0.29960900  | -0.11079700 |
| H | 5.70574700  | 0.80060300  | -1.08738100 |
| H | 5.73344000  | 1.09719500  | 0.64136100  |
| C | 4.41047500  | -0.50497700 | 0.04536300  |
| H | 4.41682200  | -1.01689100 | 1.01636900  |
| H | 4.38259200  | -1.29660700 | -0.71484900 |
| C | 3.14173100  | 0.34797500  | -0.06697700 |
| H | 3.14594100  | 0.87744400  | -1.02860300 |
| H | 3.16003300  | 1.12576800  | 0.70727900  |
| C | 1.84509000  | -0.46014800 | 0.05727600  |
| H | 1.84514200  | -1.00090700 | 1.01261000  |
| H | 1.82284100  | -1.22893900 | -0.72607400 |
| C | 0.57625000  | 0.39474500  | -0.03870300 |
| H | 0.58595200  | 0.95133300  | -0.98489600 |
| H | 0.58879900  | 1.15042400  | 0.75738500  |
| C | -0.72065600 | -0.41717300 | 0.05485100  |
| H | -0.72693200 | -0.98269200 | 0.99575000  |
| H | -0.73642700 | -1.16535600 | -0.74832800 |
| C | -1.98974500 | 0.43871500  | -0.02811400 |
| H | -1.97688700 | 1.01483300  | -0.96251700 |
| H | -1.98080700 | 1.17776200  | 0.78351600  |
| C | -3.28646400 | -0.37569700 | 0.04422200  |
| H | -3.29731800 | -0.95699200 | 0.97541700  |
| H | -3.29723700 | -1.11027600 | -0.77147500 |
| C | -4.55587500 | 0.48043600  | -0.03125600 |
| H | -4.54182900 | 1.06677900  | -0.95928700 |
| H | -4.54860100 | 1.21055300  | 0.78847500  |
| C | -5.85232500 | -0.33489500 | 0.03052800  |
| H | -5.86720800 | -0.92264100 | 0.95780900  |
| H | -5.86083600 | -1.06419500 | -0.79014300 |
| C | -7.12261200 | 0.52009000  | -0.04378900 |
| H | -7.10772000 | 1.10748800  | -0.97005300 |
| H | -7.11581900 | 1.24777400  | 0.77686900  |

|   |             |             |             |
|---|-------------|-------------|-------------|
| C | -8.41215300 | -0.30396500 | 0.01663500  |
| H | -8.47363100 | -0.87436800 | 0.94895000  |
| H | -9.29838300 | 0.33428800  | -0.04066400 |
| H | -8.46379400 | -1.01872300 | -0.81089800 |
| H | 8.38310700  | 1.69564500  | 1.57913100  |

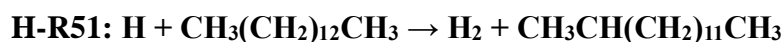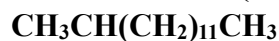

|   |             |             |             |
|---|-------------|-------------|-------------|
| C | 8.42344200  | -0.18393100 | 0.16843400  |
| H | 8.74719500  | -0.76126900 | -0.71461600 |
| H | 8.40752200  | -0.89412000 | 1.00472300  |
| H | 9.20265700  | 0.55628300  | 0.36700100  |
| C | 7.09040700  | 0.45037800  | -0.03761700 |
| H | 7.04693600  | 1.47853900  | -0.38520700 |
| C | 5.83882500  | -0.36232700 | -0.05960300 |
| H | 5.84857300  | -1.07404800 | 0.77976100  |
| H | 5.82088900  | -0.99982000 | -0.96361400 |
| C | 4.54673900  | 0.46520400  | -0.01684500 |
| H | 4.54133600  | 1.16408700  | -0.86281400 |
| H | 4.54746000  | 1.08251300  | 0.88962400  |
| C | 3.27339500  | -0.38630800 | -0.05368900 |
| H | 3.28189100  | -1.08612100 | 0.79211400  |
| H | 3.27778300  | -1.00617100 | -0.95980100 |
| C | 1.98197000  | 0.43848300  | -0.01233000 |
| H | 1.97068400  | 1.13518600  | -0.86057600 |
| H | 1.97975700  | 1.06153200  | 0.89145000  |
| C | 0.70784300  | -0.41340900 | -0.04129000 |
| H | 0.71921900  | -1.10916200 | 0.80776500  |
| H | 0.71059200  | -1.03765700 | -0.94432800 |
| C | -0.58426800 | 0.41046300  | -0.00109000 |
| H | -0.59677700 | 1.10491600  | -0.85118800 |
| H | -0.58618400 | 1.03607700  | 0.90098900  |
| C | -1.85799000 | -0.44213300 | -0.02682400 |
| H | -1.84532600 | -1.13637400 | 0.82345700  |
| H | -1.85591200 | -1.06803800 | -0.92871900 |
| C | -3.15048100 | 0.38115900  | 0.01326000  |
| H | -3.16346500 | 1.07519400  | -0.83716800 |
| H | -3.15249000 | 1.00723900  | 0.91501600  |
| C | -4.42398600 | -0.47182600 | -0.01189900 |
| H | -4.41071200 | -1.16628100 | 0.83822400  |
| H | -4.42222400 | -1.09748300 | -0.91399300 |
| C | -5.71659600 | 0.35086500  | 0.02905100  |
| H | -5.73048400 | 1.04637700  | -0.82037800 |

|   |             |             |             |
|---|-------------|-------------|-------------|
| H | -5.71997000 | 0.97582100  | 0.93178900  |
| C | -6.99073500 | -0.50118500 | 0.00220900  |
| H | -6.97716300 | -1.19659100 | 0.85035000  |
| H | -6.98848400 | -1.12415000 | -0.90063100 |
| C | -8.27649200 | 0.32984000  | 0.04516100  |
| H | -8.33516800 | 1.01192000  | -0.80904000 |
| H | -9.16565400 | -0.30653700 | 0.02314300  |
| H | -8.32491300 | 0.93650200  | 0.95509100  |

**TS51:  $\text{H} + \text{CH}_3(\text{CH}_2)_{12}\text{CH}_3 \rightarrow \text{H}_2 + \text{CH}_3\text{CH}(\text{CH}_2)_{11}\text{CH}_3$**

|   |             |             |             |
|---|-------------|-------------|-------------|
| C | 8.29019200  | -0.33309900 | 0.01706000  |
| H | 8.40625800  | -1.11871600 | -0.74041700 |
| H | 8.33975000  | -0.81529700 | 0.99818800  |
| H | 9.14713900  | 0.33963900  | -0.07240800 |
| C | 6.98209100  | 0.40427300  | -0.16700600 |
| H | 6.97659300  | 1.33384600  | 0.76247800  |
| H | 6.95552300  | 1.01545800  | -1.07350700 |
| C | 5.71236600  | -0.39345200 | 0.04753800  |
| H | 5.73183400  | -0.84201100 | 1.04937600  |
| H | 5.70647500  | -1.24061100 | -0.65650000 |
| C | 4.42383100  | 0.41850200  | -0.12924600 |
| H | 4.42053900  | 0.87657900  | -1.12658200 |
| H | 4.42097000  | 1.24837100  | 0.58766600  |
| C | 3.14913300  | -0.41356800 | 0.04856400  |
| H | 3.16572700  | -0.89610700 | 1.03436200  |
| H | 3.14325800  | -1.22806900 | -0.68766300 |
| C | 1.85971900  | 0.40360600  | -0.09015500 |
| H | 1.85747300  | 0.91508400  | -1.06148500 |
| H | 1.85206800  | 1.19598100  | 0.66939500  |
| C | 0.58319400  | -0.43510400 | 0.03994500  |
| H | 0.59837000  | -0.97257700 | 0.99702200  |
| H | 0.57774000  | -1.20678300 | -0.74085700 |
| C | -0.70592400 | 0.38903300  | -0.05461300 |
| H | -0.70840000 | 0.95088000  | -0.99773400 |
| H | -0.71281200 | 1.14046900  | 0.74555000  |
| C | -1.98314000 | -0.45424000 | 0.03269500  |
| H | -1.97121700 | -1.03456800 | 0.96448800  |
| H | -1.98609400 | -1.18976000 | -0.78222200 |
| C | -3.27184600 | 0.37365200  | -0.02923700 |
| H | -3.27592500 | 0.96859500  | -0.95183300 |
| H | -3.27646900 | 1.09630000  | 0.79705500  |
| C | -4.54958100 | -0.47119000 | 0.03161300  |
| H | -4.54031500 | -1.07598600 | 0.94777700  |

|   |             |             |             |
|---|-------------|-------------|-------------|
| H | -4.55057100 | -1.18492300 | -0.80248000 |
| C | -5.83786300 | 0.35813900  | -0.01217100 |
| H | -5.84503700 | 0.96912000  | -0.92440700 |
| H | -5.84088400 | 1.06668100  | 0.82649900  |
| C | -7.11664200 | -0.48587200 | 0.03803400  |
| H | -7.10823000 | -1.09901300 | 0.94753900  |
| H | -7.11654300 | -1.19045500 | -0.80259800 |
| C | -8.39776100 | 0.35254900  | 0.00020500  |
| H | -8.45199700 | 0.95072000  | -0.91499900 |
| H | -9.29046300 | -0.27811700 | 0.03762100  |
| H | -8.44337200 | 1.04313500  | 0.84833500  |
| H | 6.99200500  | 1.98277200  | 1.48298900  |

**H-R52:  $\text{H} + \text{CH}_3(\text{CH}_2)_{12}\text{CH}_3 \rightarrow \text{H}_2 + \text{CH}_3\text{CH}_2\text{CH}(\text{CH}_2)_{10}\text{CH}_3$**

**$\text{CH}_3\text{CH}_2\text{CH}(\text{CH}_2)_{10}\text{CH}_3$**

|   |             |             |             |
|---|-------------|-------------|-------------|
| C | -8.29678700 | 0.56802800  | 0.23020000  |
| H | -8.40532000 | 1.15308300  | -0.68806700 |
| H | -8.13264600 | 1.26873300  | 1.05369500  |
| H | -9.24374300 | 0.05214200  | 0.41012100  |
| C | -7.13466900 | -0.42517400 | 0.11361200  |
| H | -7.07014900 | -1.03105600 | 1.02910900  |
| H | -7.36652300 | -1.15345400 | -0.68492400 |
| C | -5.81309400 | 0.21494800  | -0.15413000 |
| H | -5.79845200 | 1.20338700  | -0.60776600 |
| C | -4.53898600 | -0.56020300 | -0.09650300 |
| H | -4.48639000 | -1.26061800 | -0.95111500 |
| H | -4.54091500 | -1.20784000 | 0.79282600  |
| C | -3.27286800 | 0.30836500  | -0.09736400 |
| H | -3.30355600 | 0.98573600  | 0.76451000  |
| H | -3.27863400 | 0.94796700  | -0.98903200 |
| C | -1.97325600 | -0.50264700 | -0.06370700 |
| H | -1.94651300 | -1.18024000 | -0.92707700 |
| H | -1.97048400 | -1.14551800 | 0.82620500  |
| C | -0.70962700 | 0.36509300  | -0.06309100 |
| H | -0.73699100 | 1.04269800  | 0.80008700  |
| H | -0.71234500 | 1.00800300  | -0.95290100 |
| C | 0.59224900  | -0.44356900 | -0.02867900 |
| H | 0.61977200  | -1.12132400 | -0.89182100 |
| H | 0.59523900  | -1.08631300 | 0.86126500  |
| C | 1.85522600  | 0.42521300  | -0.02836200 |
| H | 1.82754700  | 1.10290800  | 0.83481200  |
| H | 1.85180100  | 1.06814800  | -0.91817400 |
| C | 3.15780000  | -0.38231700 | 0.00572500  |

|   |            |             |             |
|---|------------|-------------|-------------|
| H | 3.18534900 | -1.06039600 | -0.85715700 |
| H | 3.16178000 | -1.02477500 | 0.89586900  |
| C | 4.42031300 | 0.48719600  | 0.00497500  |
| H | 4.39271100 | 1.16535400  | 0.86782500  |
| H | 4.41614300 | 1.12963200  | -0.88522400 |
| C | 5.72325100 | -0.31937100 | 0.03892400  |
| H | 5.75172700 | -0.99820600 | -0.82354800 |
| H | 5.72896000 | -0.96146100 | 0.92953500  |
| C | 6.98617500 | 0.54960900  | 0.03708000  |
| H | 6.95820600 | 1.22777900  | 0.89873200  |
| H | 6.98127500 | 1.19034500  | -0.85320600 |
| C | 8.28257000 | -0.26512100 | 0.07179700  |
| H | 8.35639800 | -0.92804800 | -0.79619600 |
| H | 9.16324900 | 0.38331100  | 0.06973400  |
| H | 8.33272200 | -0.89027700 | 0.96902400  |

**TS52:  $\text{H} + \text{CH}_3(\text{CH}_2)_{12}\text{CH}_3 \rightarrow \text{H}_2 + \text{CH}_3\text{CH}_2\text{CH}(\text{CH}_2)_{10}\text{CH}_3$**

|   |             |             |             |
|---|-------------|-------------|-------------|
| C | -8.27203600 | 0.32631700  | -0.14615300 |
| H | -8.29719100 | 0.76088200  | -1.15023900 |
| H | -8.31168900 | 1.14901800  | 0.57327300  |
| H | -9.17811800 | -0.27210600 | -0.01989900 |
| C | -7.01414500 | -0.52387900 | 0.05538700  |
| H | -7.03193200 | -0.98443400 | 1.05077900  |
| H | -7.02061600 | -1.36055300 | -0.65915300 |
| C | -5.72143700 | 0.24844800  | -0.11343200 |
| H | -5.72858200 | 1.14026600  | 0.85762100  |
| H | -5.71953700 | 0.89402000  | -0.99742000 |
| C | -4.43011600 | -0.52382800 | 0.06140800  |
| H | -4.40154000 | -1.33454800 | -0.68341200 |
| H | -4.43346600 | -1.02075900 | 1.04020200  |
| C | -3.16457100 | 0.33136700  | -0.07675700 |
| H | -3.18022400 | 1.12124900  | 0.68365200  |
| H | -3.17874100 | 0.84196700  | -1.04815100 |
| C | -1.86749300 | -0.47487500 | 0.05144500  |
| H | -1.84462300 | -1.24933500 | -0.72639300 |
| H | -1.86559800 | -1.00836000 | 1.01078900  |
| C | -0.60048900 | 0.38193100  | -0.05074500 |
| H | -0.61145100 | 1.13775800  | 0.74506200  |
| H | -0.61453500 | 0.93803400  | -0.99714100 |
| C | 0.69772600  | -0.42838500 | 0.03833000  |
| H | 0.71630800  | -1.16996100 | -0.77090000 |
| H | 0.70355700  | -1.00145600 | 0.97463800  |
| C | 1.96521400  | 0.43074800  | -0.03488900 |



|   |             |             |             |
|---|-------------|-------------|-------------|
| H | 1.95534000  | 1.15927000  | 0.78614500  |
| H | 1.95092400  | 1.01877500  | -0.96181200 |
| C | 3.26330700  | -0.38238700 | 0.02640100  |
| H | 3.27773400  | -1.10216500 | -0.80233300 |
| H | 3.27277100  | -0.98031000 | 0.94701900  |
| C | 4.53120100  | 0.47745500  | -0.02981900 |
| H | 4.52151600  | 1.19031400  | 0.80492700  |
| H | 4.51731600  | 1.08300700  | -0.94542700 |
| C | 5.82902900  | -0.33670600 | 0.01665900  |
| H | 5.84141100  | -1.04636700 | -0.82100800 |
| H | 5.84223800  | -0.94624100 | 0.92979000  |
| C | 7.09784100  | 0.52222200  | -0.03330300 |
| H | 7.08780200  | 1.22894200  | 0.80544700  |
| H | 7.08391200  | 1.13282700  | -0.94444600 |
| C | 8.38875700  | -0.30080500 | 0.00915600  |
| H | 8.44398100  | -0.99350000 | -0.83670000 |
| H | 9.27393600  | 0.34033500  | -0.02888700 |
| H | 8.44869300  | -0.89536300 | 0.92635500  |
| H | -5.73632200 | 1.74305400  | 1.61549200  |

**H-R53:  $\text{H} + \text{CH}_3(\text{CH}_2)_{12}\text{CH}_3 \rightarrow \text{H}_2 + \text{CH}_3(\text{CH}_2)_2\text{CH}(\text{CH}_2)_9\text{CH}_3$**   
 **$\text{CH}_3(\text{CH}_2)_2\text{CH}(\text{CH}_2)_9\text{CH}_3$**

|   |             |             |             |
|---|-------------|-------------|-------------|
| C | -8.36193600 | 0.01451600  | 0.33672200  |
| H | -8.61511200 | 0.68296800  | -0.49246300 |
| H | -8.36783000 | 0.61088800  | 1.25470900  |
| H | -9.16006900 | -0.72837000 | 0.41944000  |
| C | -7.00074500 | -0.65035200 | 0.11682800  |
| H | -6.78651400 | -1.33587400 | 0.94441500  |
| H | -7.03563900 | -1.26627100 | -0.78962300 |
| C | -5.84842900 | 0.35649300  | -0.00863000 |
| H | -5.80857400 | 0.98348200  | 0.89496700  |
| H | -6.08651400 | 1.06282000  | -0.82620700 |
| C | -4.51286600 | -0.26555600 | -0.24648300 |
| H | -4.47513000 | -1.25506300 | -0.69638100 |
| C | -3.25093300 | 0.52751300  | -0.16701800 |
| H | -3.27553200 | 1.17226900  | 0.72412200  |
| H | -3.19544200 | 1.23160500  | -1.01844000 |
| C | -1.97265900 | -0.32280100 | -0.15138500 |
| H | -1.95682500 | -0.96070500 | -1.04417100 |
| H | -2.00577100 | -1.00225400 | 0.70878200  |
| C | -0.68525600 | 0.50641900  | -0.09814500 |
| H | -0.70341400 | 1.14695600  | 0.79327000  |
| H | -0.65654300 | 1.18653400  | -0.95946800 |

|   |            |             |             |
|---|------------|-------------|-------------|
| C | 0.59035500 | -0.34347500 | -0.08281000 |
| H | 0.60806400 | -0.98431400 | -0.97394500 |
| H | 0.56131100 | -1.02339000 | 0.77849600  |
| C | 1.88033800 | 0.48304000  | -0.02990200 |
| H | 1.86364300 | 1.12296800  | 0.86191900  |
| H | 1.90906800 | 1.16378000  | -0.89065100 |
| C | 3.15500500 | -0.36840600 | -0.01677500 |
| H | 3.17104200 | -1.00844400 | -0.90852700 |
| H | 3.12610500 | -1.04920200 | 0.84390400  |
| C | 4.44611700 | 0.45640200  | 0.03562300  |
| H | 4.43136300 | 1.09503600  | 0.92844000  |
| H | 4.47446100 | 1.13843900  | -0.82413900 |
| C | 5.71993800 | -0.39600800 | 0.04578500  |
| H | 5.73597100 | -1.03399200 | -0.84764400 |
| H | 5.69192800 | -1.07922300 | 0.90480400  |
| C | 7.01241400 | 0.42660600  | 0.09985800  |
| H | 6.99764700 | 1.06245700  | 0.99354100  |
| H | 7.04095600 | 1.10982300  | -0.75778900 |
| C | 8.27871700 | -0.43481100 | 0.10784900  |
| H | 8.34071000 | -1.05488900 | -0.79213900 |
| H | 9.18171700 | 0.18074800  | 0.14940800  |
| H | 8.29455800 | -1.10626700 | 0.97227800  |

**TS53:  $\text{H} + \text{CH}_3(\text{CH}_2)_{12}\text{CH}_3 \rightarrow \text{H}_2 + \text{CH}_3(\text{CH}_2)_2\text{CH}(\text{CH}_2)_9\text{CH}_3$**

|   |             |             |             |
|---|-------------|-------------|-------------|
| C | -8.30623600 | -0.27956200 | 0.03309600  |
| H | -8.37921700 | -0.69498000 | 1.04311400  |
| H | -8.38161500 | -1.11281000 | -0.67299800 |
| H | -9.17432100 | 0.36669800  | -0.12265200 |
| C | -6.99666900 | 0.49108100  | -0.15443300 |
| H | -6.96878500 | 0.92709800  | -1.16028000 |
| H | -6.96362800 | 1.33386900  | 0.54510500  |
| C | -5.75101500 | -0.37990800 | 0.04886900  |
| H | -5.77922200 | -1.22061200 | -0.66201400 |
| H | -5.78036400 | -0.83598800 | 1.04719600  |
| C | -4.44178300 | 0.36243900  | -0.12397800 |
| H | -4.42407800 | 1.25378300  | 0.84677800  |
| H | -4.42645500 | 1.00766300  | -1.00797500 |
| C | -3.16819100 | -0.43980100 | 0.04752300  |
| H | -3.15921600 | -1.24890800 | -0.69952200 |
| H | -3.18211900 | -0.93928300 | 1.02489000  |
| C | -1.88330700 | 0.38613700  | -0.08940900 |
| H | -1.87974500 | 1.17372500  | 0.67352900  |
| H | -1.88631600 | 0.90003900  | -1.05916500 |

|   |             |             |             |
|---|-------------|-------------|-------------|
| C | -0.60527900 | -0.45059300 | 0.03525900  |
| H | -0.59998300 | -1.22149500 | -0.74640600 |
| H | -0.61639200 | -0.98874300 | 0.99193600  |
| C | 0.68129600  | 0.37710000  | -0.06173400 |
| H | 0.68635500  | 1.12995800  | 0.73695000  |
| H | 0.68181200  | 0.93697300  | -1.00600600 |
| C | 1.96042800  | -0.46311200 | 0.02686900  |
| H | 1.96432300  | -1.20132200 | -0.78562100 |
| H | 1.95062200  | -1.04028500 | 0.96062500  |
| C | 3.24723400  | 0.36740600  | -0.03888900 |
| H | 3.25008000  | 1.09399300  | 0.78390900  |
| H | 3.25022500  | 0.95785000  | -0.96436500 |
| C | 4.52666600  | -0.47453600 | 0.02644000  |
| H | 4.52913000  | -1.19275900 | -0.80379100 |
| H | 4.51855200  | -1.07436400 | 0.94586900  |
| C | 5.81330400  | 0.35708400  | -0.02174200 |
| H | 5.81446200  | 1.07072100  | 0.81258600  |
| H | 5.81980000  | 0.96247200  | -0.93770100 |
| C | 7.09367500  | -0.48414200 | 0.03439400  |
| H | 7.09530500  | -1.19412900 | -0.80167700 |
| H | 7.08602400  | -1.09140700 | 0.94784100  |
| C | 8.37320900  | 0.35645400  | -0.00829600 |
| H | 8.41700300  | 1.05277800  | 0.83521900  |
| H | 9.26707300  | -0.27225900 | 0.03387100  |
| H | 8.42687100  | 0.94858000  | -0.92745600 |
| H | -4.41616600 | 1.85686100  | 1.60440700  |

**H-R54:  $\text{H} + \text{CH}_3(\text{CH}_2)_{12}\text{CH}_3 \rightarrow \text{H}_2 + \text{CH}_3(\text{CH}_2)_3\text{CH}(\text{CH}_2)_8\text{CH}_3$**   
 **$\text{CH}_3(\text{CH}_2)_3\text{CH}(\text{CH}_2)_8\text{CH}_3$**

|   |             |             |             |
|---|-------------|-------------|-------------|
| C | -8.28146800 | 0.63886700  | 0.21595800  |
| H | -8.36947300 | 1.15580600  | -0.74494400 |
| H | -8.17992100 | 1.40304600  | 0.99310400  |
| H | -9.22059800 | 0.10751100  | 0.39382600  |
| C | -7.08617000 | -0.31843800 | 0.22171300  |
| H | -7.04639500 | -0.84674300 | 1.18223100  |
| H | -7.23315400 | -1.09074800 | -0.54332000 |
| C | -5.74691100 | 0.38479800  | -0.02251300 |
| H | -5.59463100 | 1.15471500  | 0.74384000  |
| H | -5.78578300 | 0.91367200  | -0.98338900 |
| C | -4.54408300 | -0.56808500 | -0.02324400 |
| H | -4.71742400 | -1.35688300 | -0.77900400 |
| H | -4.50311600 | -1.10956900 | 0.93443900  |
| C | -3.23254500 | 0.09759100  | -0.27729900 |

|   |             |             |             |
|---|-------------|-------------|-------------|
| H | -3.22814000 | 1.07240800  | -0.75919500 |
| C | -1.94186200 | -0.64168900 | -0.15359200 |
| H | -1.85074500 | -1.37713700 | -0.97487400 |
| H | -1.95104400 | -1.25052600 | 0.76289200  |
| C | -0.69717500 | 0.25700700  | -0.16099000 |
| H | -0.76206000 | 0.96469400  | 0.67426700  |
| H | -0.69926300 | 0.86307900  | -1.07581800 |
| C | 0.62019000  | -0.52044600 | -0.07166300 |
| H | 0.68103900  | -1.22665300 | -0.91003900 |
| H | 0.61916500  | -1.13200200 | 0.84006600  |
| C | 1.86305300  | 0.37670800  | -0.07599200 |
| H | 1.80494400  | 1.07901200  | 0.76566600  |
| H | 1.86101400  | 0.99246200  | -0.98481900 |
| C | 3.18242800  | -0.39971100 | 0.00428300  |
| H | 3.24043400  | -1.10136800 | -0.83801200 |
| H | 3.18483200  | -1.01619100 | 0.91261300  |
| C | 4.42499100  | 0.49798800  | -0.00016300 |
| H | 4.36853100  | 1.19762100  | 0.84393400  |
| H | 4.42051500  | 1.11673000  | -0.90699100 |
| C | 5.74504000  | -0.27738300 | 0.07475700  |
| H | 5.80268100  | -0.97691000 | -0.76955500 |
| H | 5.75103900  | -0.89653800 | 0.98145900  |
| C | 6.98773600  | 0.62022200  | 0.07009400  |
| H | 6.93114000  | 1.31835800  | 0.91422300  |
| H | 6.98188600  | 1.23881300  | -0.83572200 |
| C | 8.30180900  | -0.16291000 | 0.14413000  |
| H | 8.40487200  | -0.84423300 | -0.70648000 |
| H | 9.16717100  | 0.50582100  | 0.13998300  |
| H | 8.35229200  | -0.76536500 | 1.05674200  |

**TS54:  $\text{H} + \text{CH}_3(\text{CH}_2)_{12}\text{CH}_3 \rightarrow \text{H}_2 + \text{CH}_3(\text{CH}_2)_3\text{CH}(\text{CH}_2)_8\text{CH}_3$**

|   |             |             |             |
|---|-------------|-------------|-------------|
| C | -8.29525800 | 0.36887700  | -0.11631700 |
| H | -8.33147400 | 0.81156000  | -1.11682800 |
| H | -8.33284300 | 1.18838100  | 0.60834000  |
| H | -9.20045300 | -0.23071000 | 0.01389900  |
| C | -7.03241000 | -0.47715900 | 0.06906700  |
| H | -7.04308700 | -0.93537600 | 1.06547500  |
| H | -7.04178700 | -1.30800500 | -0.64728700 |
| C | -5.73705800 | 0.32374700  | -0.10208800 |
| H | -5.72063600 | 1.14584600  | 0.62381400  |
| H | -5.72986400 | 0.79253700  | -1.09460600 |
| C | -4.46903800 | -0.52200000 | 0.06411500  |
| H | -4.47730800 | -1.33524100 | -0.67825900 |

|   |             |             |             |
|---|-------------|-------------|-------------|
| H | -4.48119300 | -1.01622900 | 1.04436100  |
| C | -3.18037500 | 0.26087300  | -0.08441800 |
| H | -3.17897100 | 1.10913700  | 0.92403700  |
| H | -3.18745400 | 0.94369000  | -0.93975400 |
| C | -1.88514000 | -0.51419800 | 0.04549300  |
| H | -1.85858900 | -1.28877700 | -0.73680400 |
| H | -1.88012300 | -1.05652400 | 0.99985700  |
| C | -0.62369300 | 0.35165200  | -0.06058900 |
| H | -0.63990500 | 1.10822900  | 0.73287400  |
| H | -0.64353600 | 0.90312800  | -1.00929100 |
| C | 0.67730900  | -0.45351900 | 0.02924900  |
| H | 0.69885900  | -1.19795400 | -0.77736700 |
| H | 0.68684900  | -1.02274300 | 0.96779000  |
| C | 1.94004800  | 0.41215300  | -0.04782400 |
| H | 1.92559000  | 1.14431800  | 0.76974400  |
| H | 1.92292600  | 0.99564300  | -0.97753900 |
| C | 3.24240000  | -0.39374500 | 0.01798700  |
| H | 3.26184000  | -1.11684300 | -0.80775700 |
| H | 3.25421800  | -0.98765900 | 0.94115000  |
| C | 4.50531300  | 0.47325000  | -0.04028100 |
| H | 4.49008900  | 1.18968500  | 0.79127700  |
| H | 4.48925300  | 1.07465200  | -0.95857900 |
| C | 5.80785500  | -0.33298400 | 0.01184200  |
| H | 5.82616500  | -1.04588300 | -0.82296600 |
| H | 5.82299300  | -0.93874500 | 0.92744600  |
| C | 7.07146400  | 0.53352500  | -0.03906700 |
| H | 7.05532900  | 1.24352000  | 0.79680100  |
| H | 7.05564400  | 1.14036300  | -0.95269100 |
| C | 8.36736000  | -0.28129000 | 0.00937500  |
| H | 8.42875400  | -0.97699900 | -0.83358100 |
| H | 9.24857600  | 0.36523400  | -0.02936700 |
| H | 8.42908400  | -0.87177200 | 0.92908300  |
| H | -3.18161800 | 1.67844300  | 1.70745800  |

**H-R55:  $\text{H} + \text{CH}_3(\text{CH}_2)_{12}\text{CH}_3 \rightarrow \text{H}_2 + \text{CH}_3(\text{CH}_2)_4\text{CH}(\text{CH}_2)_7\text{CH}_3$**   
 **$\text{CH}_3(\text{CH}_2)_4\text{CH}(\text{CH}_2)_7\text{CH}_3$**

|   |             |             |             |
|---|-------------|-------------|-------------|
| C | -8.28516700 | -0.19681600 | 0.51687300  |
| H | -8.54355600 | 0.71990600  | -0.02276600 |
| H | -8.25096000 | 0.04721100  | 1.58345700  |
| H | -9.09962300 | -0.91094300 | 0.36623400  |
| C | -6.94642000 | -0.76400300 | 0.03585900  |
| H | -6.73210900 | -1.69704000 | 0.57117600  |
| H | -7.02394800 | -1.03374000 | -1.02452200 |

|   |             |             |             |
|---|-------------|-------------|-------------|
| C | -5.77363100 | 0.20504500  | 0.22424200  |
| H | -5.70049500 | 0.47938400  | 1.28491700  |
| H | -5.98617500 | 1.13721800  | -0.31568700 |
| C | -4.42970600 | -0.35986400 | -0.24631600 |
| H | -4.50259500 | -0.63601100 | -1.30585700 |
| H | -4.21361800 | -1.28780900 | 0.29693300  |
| C | -3.25478200 | 0.61082400  | -0.06228100 |
| H | -3.18795100 | 0.91206800  | 0.99401700  |
| H | -3.48169800 | 1.54794100  | -0.60442600 |
| C | -1.93828100 | 0.06801900  | -0.51005900 |
| H | -1.93150000 | -0.73111000 | -1.24802700 |
| C | -0.65252700 | 0.76627200  | -0.21468700 |
| H | -0.69545900 | 1.20848900  | 0.79082200  |
| H | -0.52498500 | 1.62779700  | -0.89677500 |
| C | 0.58907700  | -0.13163300 | -0.32911400 |
| H | 0.61533500  | -0.57985200 | -1.33044300 |
| H | 0.49173300  | -0.96571400 | 0.37601400  |
| C | 1.90611800  | 0.60705000  | -0.06896200 |
| H | 1.86875700  | 1.07506200  | 0.92345400  |
| H | 2.00928800  | 1.42974700  | -0.78843200 |
| C | 3.14115400  | -0.29727300 | -0.15257000 |
| H | 3.17693500  | -0.77059600 | -1.14241400 |
| H | 3.03766700  | -1.11614000 | 0.57104100  |
| C | 4.46151800  | 0.43835200  | 0.10327700  |
| H | 4.42098500  | 0.92153600  | 1.08821500  |
| H | 4.57172300  | 1.24968300  | -0.62791800 |
| C | 5.69366100  | -0.47117900 | 0.03852200  |
| H | 5.73390300  | -0.95801700 | -0.94477800 |
| H | 5.58479000  | -1.28040800 | 0.77246000  |
| C | 7.01575500  | 0.26258600  | 0.29085300  |
| H | 6.97413200  | 0.75348400  | 1.27090000  |
| H | 7.12819200  | 1.06680100  | -0.44650800 |
| C | 8.23925200  | -0.65693700 | 0.23342700  |
| H | 8.32761300  | -1.13727700 | -0.74628600 |
| H | 9.16490200  | -0.10394000 | 0.41622200  |
| H | 8.17258800  | -1.45037600 | 0.98458700  |

**TS55:  $\text{H} + \text{CH}_3(\text{CH}_2)_{12}\text{CH}_3 \rightarrow \text{H}_2 + \text{CH}_3(\text{CH}_2)_4\text{CH}(\text{CH}_2)_7\text{CH}_3$**

|   |             |             |             |
|---|-------------|-------------|-------------|
| C | -8.32617600 | -0.24032800 | 0.07326700  |
| H | -8.38555200 | -0.67884300 | 1.07448200  |
| H | -8.41130000 | -1.05765500 | -0.65006800 |
| H | -9.19648700 | 0.40901800  | -0.05630300 |
| C | -7.01770100 | 0.53265800  | -0.11520300 |

|   |             |             |             |
|---|-------------|-------------|-------------|
| H | -7.00540300 | 0.99290700  | -1.11078000 |
| H | -6.97662700 | 1.36107200  | 0.60240000  |
| C | -5.76845500 | -0.33996900 | 0.05137600  |
| H | -5.80466100 | -1.16321600 | -0.67440800 |
| H | -5.78680500 | -0.80962500 | 1.04350500  |
| C | -4.45480500 | 0.43044800  | -0.11814700 |
| H | -4.41231700 | 1.24221900  | 0.61795500  |
| H | -4.44026900 | 0.91120800  | -1.10470700 |
| C | -3.20723700 | -0.44896200 | 0.03030300  |
| H | -3.23742400 | -1.24987800 | -0.72468400 |
| H | -3.22846200 | -0.95797400 | 1.00275400  |
| C | -1.90087200 | 0.30558200  | -0.10983900 |
| H | -1.88045300 | 1.14246600  | 0.90786200  |
| H | -1.89226000 | 0.99763800  | -0.95771000 |
| C | -0.62324300 | -0.49934200 | 0.01286900  |
| H | -0.61287200 | -1.26668000 | -0.77688000 |
| H | -0.63104500 | -1.05080800 | 0.96197300  |
| C | 0.65664000  | 0.34017200  | -0.08350300 |
| H | 0.65181900  | 1.09403200  | 0.71269600  |
| H | 0.65337200  | 0.89540900  | -1.03020800 |
| C | 1.94046400  | -0.49161000 | 0.01102500  |
| H | 1.95130200  | -1.23486100 | -0.79688000 |
| H | 1.93357600  | -1.06251200 | 0.94856800  |
| C | 3.22047500  | 0.34904200  | -0.05757500 |
| H | 3.21296100  | 1.08385600  | 0.75771000  |
| H | 3.22272700  | 0.92993400  | -0.98905400 |
| C | 4.50672600  | -0.48107400 | 0.02265200  |
| H | 4.51951600  | -1.20852400 | -0.79941600 |
| H | 4.49970400  | -1.07039600 | 0.94883500  |
| C | 5.78586700  | 0.36184300  | -0.02898700 |
| H | 5.77524400  | 1.08629100  | 0.79586700  |
| H | 5.79220300  | 0.95518900  | -0.95278200 |
| C | 7.07373600  | -0.46632900 | 0.04598300  |
| H | 7.08728300  | -1.18748400 | -0.78037000 |
| H | 7.06634300  | -1.06120100 | 0.96754300  |
| C | 8.34537600  | 0.38597500  | -0.00046300 |
| H | 8.37707200  | 1.09430800  | 0.83352200  |
| H | 9.24493400  | -0.23340000 | 0.05606100  |
| H | 8.39921500  | 0.96576200  | -0.92744000 |
| H | -1.87010800 | 1.70311900  | 1.69740900  |

**H-R56:**  $\text{H} + \text{CH}_3(\text{CH}_2)_{12}\text{CH}_3 \rightarrow \text{H}_2 + \text{CH}_3(\text{CH}_2)_5\text{CH}(\text{CH}_2)_6\text{CH}_3$   
 $\text{CH}_3(\text{CH}_2)_5\text{CH}(\text{CH}_2)_6\text{CH}_3$

|   |             |             |             |
|---|-------------|-------------|-------------|
| C | 8.18605600  | -0.86678500 | 0.25185600  |
| H | 8.31307400  | -1.13812100 | -0.80105900 |
| H | 8.03106000  | -1.79291000 | 0.81445900  |
| H | 9.12473800  | -0.42318400 | 0.59557200  |
| C | 7.00986900  | 0.09649900  | 0.43730300  |
| H | 6.92834100  | 0.37272700  | 1.49570500  |
| H | 7.21257800  | 1.02850300  | -0.10445600 |
| C | 5.67183000  | -0.48195800 | -0.03662800 |
| H | 5.47384100  | -1.41832500 | 0.50135300  |
| H | 5.75196400  | -0.75371000 | -1.09738700 |
| C | 4.48543200  | 0.46961100  | 0.15393200  |
| H | 4.68137100  | 1.40562300  | -0.38535400 |
| H | 4.40832800  | 0.74136600  | 1.21486100  |
| C | 3.15002100  | -0.11666900 | -0.31553800 |
| H | 2.95716100  | -1.05691200 | 0.21489700  |
| H | 3.22034000  | -0.37543800 | -1.37961700 |
| C | 1.95522100  | 0.82624300  | -0.10715300 |
| H | 2.16593700  | 1.77977500  | -0.62703300 |
| H | 1.88139000  | 1.09732500  | 0.95581600  |
| C | 0.65176900  | 0.26671500  | -0.57199100 |
| H | 0.65907300  | -0.42235600 | -1.41388300 |
| C | -0.65853600 | 0.83020000  | -0.13190300 |
| H | -0.84086400 | 1.80117700  | -0.62980200 |
| H | -0.61401200 | 1.07050800  | 0.94028400  |
| C | -1.85771400 | -0.09028600 | -0.40343300 |
| H | -1.68988700 | -1.05012000 | 0.09987500  |
| H | -1.90240700 | -0.31240800 | -1.47715900 |
| C | -3.19858000 | 0.49579700  | 0.05036700  |
| H | -3.36750300 | 1.45422700  | -0.45778900 |
| H | -3.14840600 | 0.72588300  | 1.12267200  |
| C | -4.39043900 | -0.43238600 | -0.21011500 |
| H | -4.21526500 | -1.39282900 | 0.29191700  |
| H | -4.44577100 | -0.65742000 | -1.28318300 |
| C | -5.73303700 | 0.14158800  | 0.25553900  |
| H | -5.91321700 | 1.09989000  | -0.24920300 |
| H | -5.67693000 | 0.37027500  | 1.32797000  |
| C | -6.92235500 | -0.79198900 | 0.00247000  |
| H | -6.74131700 | -1.74971000 | 0.50564000  |
| H | -6.98102400 | -1.01891300 | -1.06908700 |
| C | -8.25919200 | -0.21334600 | 0.47507500  |
| H | -8.48662600 | 0.72719700  | -0.03683200 |
| H | -9.08499100 | -0.90385900 | 0.28198100  |
| H | -8.24305600 | -0.00766500 | 1.55015400  |



**TS56:  $\text{H} + \text{CH}_3(\text{CH}_2)_{12}\text{CH}_3 \rightarrow \text{H}_2 + \text{CH}_3(\text{CH}_2)_5\text{CH}(\text{CH}_2)_6\text{CH}_3$**

|   |             |             |             |
|---|-------------|-------------|-------------|
| C | -8.31680500 | 0.41121500  | 0.00392300  |
| H | -8.37076400 | 0.97168100  | -0.93484900 |
| H | -8.33498700 | 1.13735900  | 0.82281100  |
| H | -9.22258300 | -0.19690000 | 0.07967000  |
| C | -7.05430900 | -0.45398600 | 0.06011900  |
| H | -7.04701900 | -1.02885700 | 0.99426300  |
| H | -7.08155700 | -1.19251500 | -0.75042200 |
| C | -5.75827600 | 0.35842900  | -0.04101400 |
| H | -5.73400500 | 1.09987800  | 0.76815200  |
| H | -5.76441500 | 0.93199000  | -0.97719900 |
| C | -4.48798800 | -0.49707100 | 0.02051500  |
| H | -4.51201500 | -1.23971300 | -0.78769500 |
| H | -4.48270300 | -1.06843700 | 0.95780100  |
| C | -3.19516000 | 0.31990500  | -0.07987400 |
| H | -3.17366900 | 1.06643200  | 0.72294000  |
| H | -3.19442600 | 0.88359100  | -1.02157900 |
| C | -1.92418500 | -0.53513200 | -0.00379300 |
| H | -1.94466000 | -1.28648500 | -0.80850000 |
| H | -1.91956700 | -1.10531900 | 0.93424300  |
| C | -0.63913700 | 0.25988600  | -0.11305400 |
| H | -0.64485600 | 1.06581600  | 0.92952200  |
| H | -0.64677800 | 0.97681400  | -0.93999700 |
| C | 0.66111400  | -0.51034500 | -0.00487700 |
| H | 0.68485000  | -1.27923700 | -0.79266500 |
| H | 0.67869800  | -1.05933400 | 0.94563500  |
| C | 1.91509900  | 0.36542800  | -0.11704600 |
| H | 1.87914100  | 1.14416600  | 0.65413800  |
| H | 1.90286200  | 0.88935200  | -1.08138200 |
| C | 3.22385000  | -0.42064600 | 0.01693300  |
| H | 3.25590000  | -1.20765000 | -0.74785300 |
| H | 3.23660400  | -0.93761300 | 0.98517000  |
| C | 4.47715100  | 0.45364500  | -0.10487800 |
| H | 4.43524300  | 1.25084600  | 0.64853000  |
| H | 4.47265400  | 0.95782000  | -1.08004800 |
| C | 5.78825500  | -0.32349600 | 0.05629600  |
| H | 5.82946200  | -1.12634800 | -0.69158000 |
| H | 5.79612800  | -0.82084300 | 1.03507800  |
| C | 7.04128400  | 0.55003500  | -0.07421300 |
| H | 6.99574300  | 1.35794000  | 0.66626200  |
| H | 7.03903600  | 1.03850000  | -1.05634200 |
| C | 8.34645300  | -0.23100400 | 0.10398300  |
| H | 8.43604200  | -1.02805100 | -0.64112200 |

|   |             |             |            |
|---|-------------|-------------|------------|
| H | 9.21948800  | 0.41941200  | 0.00022800 |
| H | 8.39606700  | -0.69766100 | 1.09296700 |
| H | -0.64798900 | 1.60219200  | 1.73570200 |

### 2.1.15 C15 (*n*-C<sub>15</sub>H<sub>32</sub>)

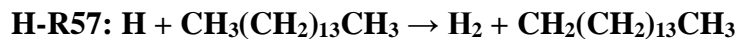

#### *n*-C<sub>15</sub>H<sub>32</sub>

|   |             |             |             |
|---|-------------|-------------|-------------|
| C | 8.97511000  | -0.39797300 | 0.00000900  |
| H | 9.01999200  | -1.04376800 | -0.88283700 |
| H | 9.01997600  | -1.04355200 | 0.88301300  |
| H | 9.87283200  | 0.22677200  | -0.00005900 |
| C | 7.70047200  | 0.45122700  | -0.00011300 |
| H | 7.70125000  | 1.11121600  | 0.87607500  |
| H | 7.70126600  | 1.11100100  | -0.87646400 |
| C | 6.41519900  | -0.38433100 | -0.00002100 |
| H | 6.41524100  | -1.04532000 | -0.87678200 |
| H | 6.41526100  | -1.04515600 | 0.87686300  |
| C | 5.13317300  | 0.45580200  | -0.00007600 |
| H | 5.13397700  | 1.11636600  | -0.87697800 |
| H | 5.13400700  | 1.11653600  | 0.87669800  |
| C | 3.84908400  | -0.38154700 | 0.00002900  |
| H | 3.84853600  | -1.04217300 | 0.87685400  |
| H | 3.84847900  | -1.04230100 | -0.87669900 |
| C | 2.56655500  | 0.45813500  | 0.00001000  |
| H | 2.56694200  | 1.11875200  | -0.87683200 |
| H | 2.56697000  | 1.11883800  | 0.87678600  |
| C | 1.28302300  | -0.38000000 | 0.00007000  |
| H | 1.28284500  | -1.04066500 | 0.87687800  |
| H | 1.28280600  | -1.04073000 | -0.87669000 |
| C | 0.00000000  | 0.45890900  | 0.00006600  |
| H | -0.00000100 | 1.11956200  | -0.87675000 |
| H | 0.00000100  | 1.11957500  | 0.87687300  |
| C | -1.28302300 | -0.38000000 | 0.00007200  |
| H | -1.28282000 | -1.04070300 | 0.87685200  |
| H | -1.28283100 | -1.04069300 | -0.87671600 |
| C | -2.56655500 | 0.45813500  | 0.00008400  |
| H | -2.56694300 | 1.11882800  | -0.87670100 |
| H | -2.56696900 | 1.11876300  | 0.87691700  |
| C | -3.84908400 | -0.38154700 | 0.00003100  |
| H | -3.84851800 | -1.04227900 | 0.87677600  |
| H | -3.84849700 | -1.04219600 | -0.87677700 |
| C | -5.13317300 | 0.45580300  | 0.00005300  |
| H | -5.13396700 | 1.11651300  | -0.87673800 |

|   |             |             |             |
|---|-------------|-------------|-------------|
| H | -5.13401700 | 1.11638900  | 0.87693800  |
| C | -6.41519900 | -0.38433100 | -0.00004400 |
| H | -6.41527400 | -1.04530500 | 0.87672800  |
| H | -6.41522700 | -1.04517100 | -0.87691700 |
| C | -7.70047200 | 0.45122700  | -0.00001600 |
| H | -7.70122700 | 1.11118500  | -0.87622800 |
| H | -7.70128800 | 1.11103200  | 0.87631100  |
| C | -8.97511000 | -0.39797300 | -0.00013400 |
| H | -9.02001500 | -1.04373700 | 0.88273200  |
| H | -9.87283200 | 0.22677200  | -0.00011100 |
| H | -9.01995300 | -1.04358200 | -0.88311800 |

**CH<sub>2</sub>(CH<sub>2</sub>)<sub>13</sub>CH<sub>3</sub>**

|   |             |             |             |
|---|-------------|-------------|-------------|
| C | 9.02728400  | -0.37307300 | -0.00266800 |
| H | 9.04805700  | -1.36482900 | 0.43521500  |
| H | 9.96950400  | 0.05667500  | -0.32084000 |
| C | 7.77523700  | 0.43329900  | -0.00310500 |
| H | 7.75115400  | 1.08564000  | 0.88887900  |
| H | 7.77905000  | 1.12611700  | -0.85515200 |
| C | 6.48882700  | -0.40683600 | -0.02316200 |
| H | 6.48914500  | -1.03967000 | -0.91864100 |
| H | 6.49617500  | -1.09077500 | 0.83497200  |
| C | 5.20937700  | 0.43563400  | 0.00796900  |
| H | 5.20716800  | 1.12156800  | -0.84914000 |
| H | 5.21477300  | 1.07005500  | 0.90392900  |
| C | 3.92455500  | -0.40018400 | -0.01178300 |
| H | 3.92446700  | -1.08331600 | 0.84746900  |
| H | 3.92170400  | -1.03753100 | -0.90548700 |
| C | 2.64362100  | 0.44163300  | 0.01191900  |
| H | 2.64370200  | 1.12374000  | -0.84819600 |
| H | 2.64683400  | 1.08022300  | 0.90484300  |
| C | 1.35852800  | -0.39389100 | -0.00669000 |
| H | 1.35726500  | -1.07437700 | 0.85471200  |
| H | 1.35665700  | -1.03424300 | -0.89834900 |
| C | 0.07745900  | 0.44779000  | 0.01288900  |
| H | 0.07873800  | 1.12789400  | -0.84883000 |
| H | 0.07934800  | 1.08856500  | 0.90426400  |
| C | -1.20764600 | -0.38773600 | -0.00554400 |
| H | -1.20951800 | -1.06705500 | 0.85679100  |
| H | -1.20883300 | -1.02935800 | -0.89630700 |
| C | -2.48885500 | 0.45378200  | 0.01199000  |
| H | -2.48691200 | 1.13309700  | -0.85035300 |
| H | -2.48786600 | 1.09539400  | 0.90276800  |

|   |             |             |             |
|---|-------------|-------------|-------------|
| C | -3.77380000 | -0.38198300 | -0.00679300 |
| H | -3.77583100 | -1.06119200 | 0.85562100  |
| H | -3.77457000 | -1.02372400 | -0.89746400 |
| C | -5.05528000 | 0.45917400  | 0.01029400  |
| H | -5.05317600 | 1.13869800  | -0.85190900 |
| H | -5.05488400 | 1.10055100  | 0.90126600  |
| C | -6.33992400 | -0.37667300 | -0.00922700 |
| H | -6.34265000 | -1.05701600 | 0.85250800  |
| H | -6.34164300 | -1.01768900 | -0.90062800 |
| C | -7.62237100 | 0.46304500  | 0.00900600  |
| H | -7.62023300 | 1.14290700  | -0.85175800 |
| H | -7.62164500 | 1.10245800  | 0.90026200  |
| C | -8.89982600 | -0.38153100 | -0.01164300 |
| H | -8.94711300 | -1.04805700 | 0.85543700  |
| H | -9.79530400 | 0.24612300  | 0.00322300  |
| H | -8.94667000 | -1.00557500 | -0.90981400 |

**TS57:  $\text{H} + \text{CH}_3(\text{CH}_2)_{13}\text{CH}_3 \rightarrow \text{H}_2 + \text{CH}_2(\text{CH}_2)_{13}\text{CH}_3$**

|   |             |             |             |
|---|-------------|-------------|-------------|
| C | 8.89017800  | 0.29212900  | -0.18983600 |
| H | 8.97279600  | 1.17170400  | 0.85266200  |
| H | 8.90889800  | 0.96147600  | -1.05061800 |
| H | 9.82127600  | -0.26218200 | -0.07513900 |
| C | 7.62069400  | -0.50278600 | -0.00248900 |
| H | 7.58887500  | -1.30419100 | -0.75673700 |
| H | 7.64671900  | -1.01331700 | 0.96816100  |
| C | 6.34173100  | 0.33735500  | -0.11023300 |
| H | 6.36394300  | 1.12359500  | 0.65394800  |
| H | 6.33218000  | 0.85315600  | -1.07903100 |
| C | 5.05723600  | -0.48480600 | 0.03875900  |
| H | 5.07352100  | -1.01137700 | 1.00177500  |
| H | 5.03584800  | -1.26498900 | -0.73338800 |
| C | 3.77789700  | 0.35434000  | -0.05600200 |
| H | 3.77259300  | 0.89906400  | -1.00906600 |
| H | 3.78901700  | 1.11980800  | 0.73054900  |
| C | 2.49172300  | -0.47173000 | 0.05896800  |
| H | 2.50031400  | -1.02595500 | 1.00651200  |
| H | 2.47791000  | -1.22953100 | -0.73519600 |
| C | 1.21192200  | 0.36812100  | -0.02316200 |
| H | 1.21282900  | 0.93755100  | -0.96173200 |
| H | 1.21606500  | 1.11302000  | 0.78309800  |
| C | -0.07422400 | -0.46174700 | 0.06126900  |
| H | -0.07282300 | -1.03806100 | 0.99561300  |
| H | -0.08028800 | -1.20081000 | -0.75043500 |

|   |             |             |             |
|---|-------------|-------------|-------------|
| C | -1.35451500 | 0.37817900  | -0.01199500 |
| H | -1.34959500 | 0.96446900  | -0.94012200 |
| H | -1.35511700 | 1.10847900  | 0.80756000  |
| C | -2.64031400 | -0.45409500 | 0.05172900  |
| H | -2.64398500 | -1.04422700 | 0.97741300  |
| H | -2.64071900 | -1.18105400 | -0.77084300 |
| C | -3.92092900 | 0.38573000  | -0.01674800 |
| H | -3.91413900 | 0.98072700  | -0.93929600 |
| H | -3.92389200 | 1.10832100  | 0.80961500  |
| C | -5.20654500 | -0.44759500 | 0.03662800  |
| H | -5.21306400 | -1.04380500 | 0.95842300  |
| H | -5.20388600 | -1.16911600 | -0.79073700 |
| C | -6.48721000 | 0.39189400  | -0.03049700 |
| H | -6.48130400 | 0.98894500  | -0.95192000 |
| H | -6.49143100 | 1.11308700  | 0.79731700  |
| C | -7.77351300 | -0.44051400 | 0.02133400  |
| H | -7.78037100 | -1.03588200 | 0.94258400  |
| H | -7.76991600 | -1.16127100 | -0.80545900 |
| C | -9.04714000 | 0.40729000  | -0.04747600 |
| H | -9.08690600 | 0.98644700  | -0.97557100 |
| H | -9.94539800 | -0.21520700 | -0.00631000 |
| H | -9.09590000 | 1.11596000  | 0.78542600  |
| H | 9.01398600  | 1.74457700  | 1.57944300  |

**H-R58:  $\text{H} + \text{CH}_3(\text{CH}_2)_{13}\text{CH}_3 \rightarrow \text{H}_2 + \text{CH}_3\text{CH}(\text{CH}_2)_{12}\text{CH}_3$**

**$\text{CH}_3\text{CH}(\text{CH}_2)_{12}\text{CH}_3$**

|   |             |             |             |
|---|-------------|-------------|-------------|
| C | -9.06353900 | -0.25490900 | -0.16559200 |
| H | -9.37898000 | -0.83298700 | 0.71997900  |
| H | -9.03989300 | -0.96792300 | -0.99929900 |
| H | -9.85212500 | 0.47484700  | -0.36584600 |
| C | -7.73824200 | 0.39665800  | 0.03642700  |
| H | -7.70711400 | 1.42660700  | 0.38001900  |
| C | -6.47660200 | -0.40030900 | 0.06018400  |
| H | -6.45027400 | -1.03476800 | 0.96612100  |
| H | -6.47780700 | -1.11463900 | -0.77701600 |
| C | -5.19510300 | 0.44336500  | 0.01433300  |
| H | -5.19822400 | 1.14471200  | 0.85826100  |
| H | -5.20405000 | 1.05796100  | -0.89392900 |
| C | -3.91095200 | -0.39167100 | 0.05312100  |
| H | -3.91049500 | -1.09358100 | -0.79097900 |
| H | -3.90734600 | -1.00931400 | 0.96074900  |
| C | -2.63026700 | 0.44961000  | 0.00971800  |
| H | -2.62796000 | 1.14837500  | 0.85633200  |

|   |             |             |             |
|---|-------------|-------------|-------------|
| H | -2.63607800 | 1.07051100  | -0.89552200 |
| C | -1.34524500 | -0.38569000 | 0.04067300  |
| H | -1.34737900 | -1.08315700 | -0.80704200 |
| H | -1.34026400 | -1.00818200 | 0.94491100  |
| C | -0.06382300 | 0.45466900  | -0.00065200 |
| H | -0.06056100 | 1.15083700  | 0.84812400  |
| H | -0.06952000 | 1.07851200  | -0.90394000 |
| C | 1.22066400  | -0.38155600 | 0.02727100  |
| H | 1.21737500  | -1.07724700 | -0.82190800 |
| H | 1.22586400  | -1.00601900 | 0.93015300  |
| C | 2.50273800  | 0.45785900  | -0.01319900 |
| H | 2.50645300  | 1.15329800  | 0.83617800  |
| H | 2.49761100  | 1.08250900  | -0.91594300 |
| C | 3.78661100  | -0.37933100 | 0.01419200  |
| H | 3.78251500  | -1.07503500 | -0.83496300 |
| H | 3.79169100  | -1.00377400 | 0.91707700  |
| C | 5.06932400  | 0.45912000  | -0.02681400 |
| H | 5.07336000  | 1.15544600  | 0.82186000  |
| H | 5.06483100  | 1.08281600  | -0.93025000 |
| C | 6.35261300  | -0.37856300 | 0.00173700  |
| H | 6.34863200  | -1.07640700 | -0.84588000 |
| H | 6.35885200  | -1.00116400 | 0.90608700  |
| C | 7.63647300  | 0.45805200  | -0.04201200 |
| H | 7.64094200  | 1.15596000  | 0.80416500  |
| H | 7.63145500  | 1.07843600  | -0.94661500 |
| C | 8.91245700  | -0.38844900 | -0.01126900 |
| H | 8.95254700  | -1.07417000 | -0.86362400 |
| H | 9.80900000  | 0.23689200  | -0.04618700 |
| H | 8.96429500  | -0.99247500 | 0.90022100  |

**TS58:  $\text{H} + \text{CH}_3(\text{CH}_2)_{13}\text{CH}_3 \rightarrow \text{H}_2 + \text{CH}_3\text{CH}(\text{CH}_2)_{12}\text{CH}_3$**

|   |            |             |             |
|---|------------|-------------|-------------|
| C | 8.92655100 | -0.39546100 | 0.02059500  |
| H | 9.03577700 | -1.17918800 | -0.73986100 |
| H | 8.96890500 | -0.88218600 | 0.99982400  |
| H | 9.79086000 | 0.26838800  | -0.06436600 |
| C | 7.62684300 | 0.35667600  | -0.16303600 |
| H | 7.62934000 | 1.28222800  | 0.77051400  |
| H | 7.60874900 | 0.97212600  | -1.06685600 |
| C | 6.34806000 | -0.42813700 | 0.04537300  |
| H | 6.33335900 | -1.27083900 | -0.66385000 |
| H | 6.36142700 | -0.88295300 | 1.04448200  |
| C | 5.06897000 | 0.39947300  | -0.12758300 |
| H | 5.07175100 | 0.86357700  | -1.12212900 |

|   |             |             |             |
|---|-------------|-------------|-------------|
| H | 5.07511100  | 1.22497300  | 0.59432400  |
| C | 3.78457500  | -0.41878900 | 0.04437500  |
| H | 3.79536400  | -0.90834700 | 1.02678900  |
| H | 3.76896800  | -1.22795600 | -0.69754800 |
| C | 2.50505000  | 0.41479600  | -0.08851400 |
| H | 2.50869100  | 0.93255800  | -1.05650600 |
| H | 2.50740200  | 1.20225600  | 0.67615200  |
| C | 1.21842700  | -0.40905000 | 0.03679500  |
| H | 1.22709000  | -0.95230100 | 0.99068500  |
| H | 1.20340100  | -1.17597200 | -0.74855200 |
| C | -0.06051300 | 0.43138600  | -0.05277900 |
| H | -0.05629600 | 0.99835200  | -0.99282800 |
| H | -0.05795300 | 1.17847400  | 0.75146300  |
| C | -1.34792200 | -0.39665600 | 0.03024500  |
| H | -1.34342400 | -0.98137000 | 0.95935500  |
| H | -1.35945100 | -1.12835500 | -0.78803600 |
| C | -2.62656000 | 0.44695200  | -0.02851200 |
| H | -2.62259400 | 1.04663200  | -0.94804800 |
| H | -2.62343500 | 1.16535300  | 0.80149000  |
| C | -3.91417100 | -0.38311300 | 0.02650800  |
| H | -3.91329300 | -0.99253100 | 0.93961200  |
| H | -3.92219100 | -1.09267100 | -0.81107200 |
| C | -5.19285500 | 0.46145600  | -0.01520700 |
| H | -5.18936800 | 1.07841800  | -0.92326600 |
| H | -5.18939900 | 1.16405100  | 0.82826400  |
| C | -6.48033700 | -0.36927900 | 0.02509400  |
| H | -6.48315700 | -0.99009800 | 0.93068300  |
| H | -6.48650800 | -1.06873100 | -0.82118300 |
| C | -7.75987700 | 0.47432500  | -0.01051600 |
| H | -7.75628600 | 1.09632500  | -0.91401700 |
| H | -7.75606000 | 1.17069000  | 0.83692100  |
| C | -9.04028400 | -0.36525900 | 0.02540900  |
| H | -9.08969200 | -0.97227400 | 0.93504600  |
| H | -9.93353900 | 0.26515800  | -0.00156200 |
| H | -9.08960900 | -1.04765700 | -0.82912800 |
| H | 7.65031300  | 1.92794500  | 1.49372000  |

**H-R59:  $\text{H} + \text{CH}_3(\text{CH}_2)_{13}\text{CH}_3 \rightarrow \text{H}_2 + \text{CH}_3\text{CH}_2\text{CH}(\text{CH}_2)_{11}\text{CH}_3$**   
 **$\text{CH}_3\text{CH}_2\text{CH}(\text{CH}_2)_{11}\text{CH}_3$**

|   |            |             |             |
|---|------------|-------------|-------------|
| C | 8.92962100 | -0.65025800 | 0.22916400  |
| H | 9.03235400 | -1.22229600 | -0.69793900 |
| H | 8.75319100 | -1.36144400 | 1.04105400  |
| H | 9.88334900 | -0.15090000 | 0.41961400  |

|   |             |             |             |
|---|-------------|-------------|-------------|
| C | 7.78212600  | 0.36115700  | 0.12531900  |
| H | 7.72429800  | 0.95405200  | 1.04973600  |
| H | 8.02611100  | 1.09799400  | -0.66165200 |
| C | 6.45202700  | -0.25574300 | -0.15446000 |
| H | 6.42402100  | -1.23768400 | -0.62139600 |
| C | 5.18930800  | 0.53724800  | -0.08954700 |
| H | 5.14725300  | 1.24678200  | -0.93719200 |
| H | 5.20019600  | 1.17583400  | 0.80621300  |
| C | 3.91064300  | -0.31275000 | -0.09959000 |
| H | 3.93050900  | -0.99829900 | 0.75609900  |
| H | 3.90815000  | -0.94424400 | -0.99704800 |
| C | 2.62294900  | 0.51679700  | -0.05987300 |
| H | 2.60694800  | 1.20234900  | -0.91719100 |
| H | 2.62857100  | 1.15168600  | 0.83574400  |
| C | 1.34684400  | -0.33246200 | -0.06817900 |
| H | 1.36345900  | -1.01798200 | 0.78899100  |
| H | 1.34129500  | -0.96746100 | -0.96364400 |
| C | 0.05671100  | 0.49454800  | -0.02793800 |
| H | 0.04000000  | 1.18039400  | -0.88493400 |
| H | 0.06174100  | 1.12916900  | 0.86781400  |
| C | -1.21852400 | -0.35610900 | -0.03704700 |
| H | -1.20153100 | -1.04197600 | 0.81991600  |
| H | -1.22296600 | -0.99089100 | -0.93269500 |
| C | -2.50971600 | 0.46924200  | 0.00284300  |
| H | -2.52648900 | 1.15580600  | -0.85358000 |
| H | -2.50621800 | 1.10316600  | 0.89910300  |
| C | -3.78401700 | -0.38280500 | -0.00811900 |
| H | -3.76677800 | -1.06982700 | 0.84791500  |
| H | -3.78732100 | -1.01636200 | -0.90463200 |
| C | -5.07613900 | 0.44110500  | 0.03230600  |
| H | -5.09311700 | 1.12909300  | -0.82299300 |
| H | -5.07380600 | 1.07352600  | 0.92965900  |
| C | -6.34960900 | -0.41179900 | 0.01922800  |
| H | -6.33268900 | -1.10125000 | 0.87353200  |
| H | -6.35352300 | -1.04324800 | -0.87897300 |
| C | -7.64304500 | 0.40997500  | 0.06212600  |
| H | -7.66053300 | 1.09940200  | -0.79082500 |
| H | -7.64034100 | 1.03930000  | 0.96054000  |
| C | -8.90896800 | -0.45191200 | 0.04703800  |
| H | -8.93608100 | -1.12949000 | 0.90638700  |
| H | -9.81273100 | 0.16300700  | 0.08082300  |
| H | -8.95859500 | -1.06561900 | -0.85808000 |



**TS59:  $\text{H} + \text{CH}_3(\text{CH}_2)_{13}\text{CH}_3 \rightarrow \text{H}_2 + \text{CH}_3\text{CH}_2\text{CH}(\text{CH}_2)_{11}\text{CH}_3$**

|   |             |             |             |
|---|-------------|-------------|-------------|
| C | -8.90647800 | 0.39693000  | -0.14971300 |
| H | -8.92463300 | 0.84078700  | -1.14988300 |
| H | -8.93712800 | 1.21352000  | 0.57705900  |
| H | -9.82008000 | -0.19137400 | -0.03025000 |
| C | -7.65950200 | -0.47055100 | 0.04609600  |
| H | -7.68465400 | -0.93978400 | 1.03726500  |
| H | -7.67515000 | -1.30059400 | -0.67598600 |
| C | -6.35704400 | 0.28718800  | -0.11375700 |
| H | -6.34539800 | 0.93994300  | -0.99237600 |
| H | -6.35526100 | 1.17112300  | 0.86464700  |
| C | -5.07577700 | -0.50243900 | 0.05732800  |
| H | -5.05628300 | -1.30786800 | -0.69350800 |
| H | -5.08698700 | -1.00663700 | 1.03234200  |
| C | -3.79922500 | 0.33751600  | -0.07261600 |
| H | -3.80564900 | 1.12168800  | 0.69380300  |
| H | -3.80544200 | 0.85563000  | -1.04010500 |
| C | -2.51291100 | -0.48653900 | 0.05099900  |
| H | -2.49996900 | -1.25615600 | -0.73185200 |
| H | -2.51861900 | -1.02624300 | 1.00684300  |
| C | -1.23455100 | 0.35390100  | -0.04522200 |
| H | -1.23589000 | 1.10509600  | 0.75503200  |
| H | -1.24048400 | 0.91571000  | -0.98832800 |
| C | 0.05263300  | -0.47428200 | 0.03985400  |
| H | 0.06121200  | -1.21204300 | -0.77301800 |
| H | 0.05066400  | -1.05198900 | 0.97332600  |
| C | 1.33159800  | 0.36800300  | -0.02921100 |
| H | 1.33123300  | 1.09306200  | 0.79494500  |
| H | 1.32555100  | 0.96016500  | -0.95358700 |
| C | 2.61867400  | -0.46270100 | 0.02900300  |
| H | 2.62371700  | -1.17919500 | -0.80269000 |
| H | 2.61987700  | -1.06448000 | 0.94716300  |
| C | 3.89783700  | 0.38048400  | -0.02330500 |
| H | 3.89717000  | 1.09003600  | 0.81427700  |
| H | 3.89233200  | 0.98989400  | -0.93640100 |
| C | 5.18496800  | -0.45105800 | 0.02046900  |
| H | 5.18818400  | -1.15631700 | -0.82080500 |
| H | 5.18809600  | -1.06513400 | 0.93047700  |
| C | 6.46399800  | 0.39244600  | -0.02334900 |
| H | 6.46307800  | 1.09568200  | 0.81978300  |
| H | 6.46059400  | 1.00920800  | -0.93170600 |
| C | 7.75200600  | -0.43801100 | 0.01599700  |
| H | 7.75460300  | -1.13917800 | -0.82749100 |

|   |             |             |             |
|---|-------------|-------------|-------------|
| H | 7.75533200  | -1.05487100 | 0.92301600  |
| C | 9.02383200  | 0.41424700  | -0.02575600 |
| H | 9.06660400  | 1.10240600  | 0.82448800  |
| H | 9.92344900  | -0.20690000 | 0.00466900  |
| H | 9.06666900  | 1.01607000  | -0.93917200 |
| H | -6.35708200 | 1.76793400  | 1.62712400  |

**H-R60:  $\text{H} + \text{CH}_3(\text{CH}_2)_{13}\text{CH}_3 \rightarrow \text{H}_2 + \text{CH}_3(\text{CH}_2)_2\text{CH}(\text{CH}_2)_{10}\text{CH}_3$**   
 **$\text{CH}_3(\text{CH}_2)_2\text{CH}(\text{CH}_2)_{10}\text{CH}_3$**

|   |             |             |             |
|---|-------------|-------------|-------------|
| C | 9.00225400  | -0.07298300 | 0.36525400  |
| H | 9.25839600  | -0.71613600 | -0.48281500 |
| H | 8.99564300  | -0.69878800 | 1.26345500  |
| H | 9.80466600  | 0.66112900  | 0.47909400  |
| C | 7.64760700  | 0.60815000  | 0.15495300  |
| H | 7.43127400  | 1.26967500  | 1.00129700  |
| H | 7.69399600  | 1.25103300  | -0.73203400 |
| C | 6.48935300  | -0.38633600 | -0.00997900 |
| H | 6.73018700  | -1.07017300 | -0.84568900 |
| H | 6.43681200  | -1.03864900 | 0.87470600  |
| C | 5.16058500  | 0.25238800  | -0.24167200 |
| H | 5.13432700  | 1.24971700  | -0.67487100 |
| C | 3.89059900  | -0.52943200 | -0.18077400 |
| H | 3.90460900  | -1.18813500 | 0.70032500  |
| H | 3.83235500  | -1.21964900 | -1.04330100 |
| C | 2.62076400  | 0.33322400  | -0.15772500 |
| H | 2.61404300  | 0.98324200  | -1.04183600 |
| H | 2.65789200  | 1.00067700  | 0.71164600  |
| C | 1.32497500  | -0.48364800 | -0.11937800 |
| H | 1.33425300  | -1.13639200 | 0.76327600  |
| H | 1.29182100  | -1.15171500 | -0.98993700 |
| C | 0.05796300  | 0.37881600  | -0.09567400 |
| H | 0.04849000  | 1.03117700  | -0.97853600 |
| H | 0.09211600  | 1.04734800  | 0.77433300  |
| C | -1.24037600 | -0.43522500 | -0.05569500 |
| H | -1.23144600 | -1.08716500 | 0.82749300  |
| H | -1.27461900 | -1.10412400 | -0.92549700 |
| C | -2.50648100 | 0.42868700  | -0.03284700 |
| H | -2.51472600 | 1.08099900  | -0.91577800 |
| H | -2.47219700 | 1.09736500  | 0.83711500  |
| C | -3.80571500 | -0.38395000 | 0.00630000  |
| H | -3.79819300 | -1.03573600 | 0.88961400  |
| H | -3.83978800 | -1.05305200 | -0.86334800 |
| C | -5.07125600 | 0.48087800  | 0.02777400  |

|   |             |             |             |
|---|-------------|-------------|-------------|
| H | -5.07818500 | 1.13314900  | -0.85522500 |
| H | -5.03748600 | 1.14956500  | 0.89778600  |
| C | -6.37093900 | -0.33072800 | 0.06564100  |
| H | -6.36539700 | -0.98302800 | 0.94880400  |
| H | -6.40574600 | -0.99974000 | -0.80425800 |
| C | -7.63688200 | 0.53358300  | 0.08663800  |
| H | -7.64298500 | 1.18506200  | -0.79580800 |
| H | -7.60285500 | 1.20141200  | 0.95613400  |
| C | -8.92998500 | -0.28622300 | 0.12418400  |
| H | -8.96843000 | -0.92339100 | 1.01351400  |
| H | -9.81290100 | 0.35897500  | 0.14003800  |
| H | -9.01072500 | -0.93787000 | -0.75170000 |

**TS60:  $\text{H} + \text{CH}_3(\text{CH}_2)_{13}\text{CH}_3 \rightarrow \text{H}_2 + \text{CH}_3(\text{CH}_2)_2\text{CH}(\text{CH}_2)_{10}\text{CH}_3$**

|   |             |             |             |
|---|-------------|-------------|-------------|
| C | -8.94144600 | -0.34408300 | 0.03677500  |
| H | -9.00839400 | -0.75822800 | 1.04773300  |
| H | -9.00827200 | -1.17958700 | -0.66751500 |
| H | -9.81706200 | 0.29189500  | -0.11916000 |
| C | -7.64105900 | 0.44115500  | -0.15396300 |
| H | -7.61921700 | 0.87504700  | -1.16087300 |
| H | -7.61720600 | 1.28599400  | 0.54350000  |
| C | -6.38516500 | -0.41472800 | 0.05019900  |
| H | -6.40888400 | -0.86983900 | 1.04912100  |
| H | -6.40348100 | -1.25666000 | -0.65956000 |
| C | -5.08488800 | 0.34294200  | -0.12374100 |
| H | -5.07669900 | 1.23369200  | 0.84763500  |
| H | -5.07807700 | 0.98898800  | -1.00724000 |
| C | -3.80172500 | -0.44438000 | 0.04561700  |
| H | -3.78244500 | -1.25054500 | -0.70439700 |
| H | -3.81000800 | -0.94752300 | 1.02116000  |
| C | -2.52694700 | 0.39775900  | -0.08755100 |
| H | -2.53284600 | 1.18151700  | 0.67928700  |
| H | -2.53647000 | 0.91640300  | -1.05473600 |
| C | -1.23882500 | -0.42397500 | 0.03269600  |
| H | -1.22377800 | -1.19010500 | -0.75351500 |
| H | -1.24361700 | -0.96788300 | 0.98616600  |
| C | 0.03757900  | 0.41997200  | -0.05890200 |
| H | 0.03378100  | 1.16728800  | 0.74496600  |
| H | 0.03095600  | 0.98632300  | -0.99928200 |
| C | 1.32673800  | -0.40540000 | 0.02340800  |
| H | 1.33913200  | -1.13769400 | -0.79433900 |
| H | 1.32417400  | -0.98934500 | 0.95299100  |
| C | 2.60363800  | 0.44069600  | -0.03689300 |

|   |             |             |             |
|---|-------------|-------------|-------------|
| H | 2.59911300  | 1.16045400  | 0.79188500  |
| H | 2.59856200  | 1.03875600  | -0.95746900 |
| C | 3.89266000  | -0.38707800 | 0.01967100  |
| H | 3.90199500  | -1.09810500 | -0.81665500 |
| H | 3.89265500  | -0.99486200 | 0.93385800  |
| C | 5.16997100  | 0.45948700  | -0.02329500 |
| H | 5.16484800  | 1.16408800  | 0.81847700  |
| H | 5.16610400  | 1.07423200  | -0.93285000 |
| C | 6.45869100  | -0.36919200 | 0.01988700  |
| H | 6.46652800  | -1.07066600 | -0.82470200 |
| H | 6.46179300  | -0.98781600 | 0.92697400  |
| C | 7.73698400  | 0.47624500  | -0.01682500 |
| H | 7.73135500  | 1.17484500  | 0.82875100  |
| H | 7.73329000  | 1.09581900  | -0.92198900 |
| C | 9.01860600  | -0.36133000 | 0.02253100  |
| H | 9.06972000  | -1.04601900 | -0.83006700 |
| H | 9.91093600  | 0.27035000  | -0.00540000 |
| H | 9.06813000  | -0.96574200 | 0.93389300  |
| H | -5.07549900 | 1.83638900  | 1.60566200  |

**H-R61:  $\text{H} + \text{CH}_3(\text{CH}_2)_{13}\text{CH}_3 \rightarrow \text{H}_2 + \text{CH}_3(\text{CH}_2)_3\text{CH}(\text{CH}_2)_9\text{CH}_3$**   
 **$\text{CH}_3(\text{CH}_2)_3\text{CH}(\text{CH}_2)_9\text{CH}_3$**

|   |             |             |             |
|---|-------------|-------------|-------------|
| C | -8.85727300 | 0.85845000  | 0.30129200  |
| H | -8.99669000 | 1.19704100  | -0.73033500 |
| H | -8.67030900 | 1.74427300  | 0.91654000  |
| H | -9.79980500 | 0.41565800  | 0.63525600  |
| C | -7.70144500 | -0.14090200 | 0.40451100  |
| H | -7.60889100 | -0.48483200 | 1.44201800  |
| H | -7.93523300 | -1.03223900 | -0.19068900 |
| C | -6.35919500 | 0.43659100  | -0.05642100 |
| H | -6.44941300 | 0.77765300  | -1.09567200 |
| H | -6.12275600 | 1.32781500  | 0.53771900  |
| C | -5.19406600 | -0.55737900 | 0.04617500  |
| H | -5.44848300 | -1.46111600 | -0.53903700 |
| H | -5.10590100 | -0.91520500 | 1.08294900  |
| C | -3.88043600 | -0.01145400 | -0.40609600 |
| H | -3.87848900 | 0.80965500  | -1.11947500 |
| C | -2.59908500 | -0.73525100 | -0.15654000 |
| H | -2.52055900 | -1.60711900 | -0.83305400 |
| H | -2.61122600 | -1.16723300 | 0.85464900  |
| C | -1.34283400 | 0.13122800  | -0.32992200 |
| H | -1.39711800 | 0.97979700  | 0.36263600  |
| H | -1.34045000 | 0.56083500  | -1.33969600 |

|   |             |             |             |
|---|-------------|-------------|-------------|
| C | -0.03500300 | -0.63322700 | -0.09994700 |
| H | 0.02488500  | -1.47120800 | -0.80668000 |
| H | -0.05006000 | -1.08224200 | 0.90179300  |
| C | 1.21759100  | 0.23911900  | -0.24056200 |
| H | 1.15624900  | 1.07403600  | 0.46951200  |
| H | 1.23334600  | 0.69246800  | -1.24021600 |
| C | 2.52757000  | -0.52301300 | -0.01047200 |
| H | 2.60025300  | -1.34556200 | -0.73380400 |
| H | 2.50233500  | -0.99313100 | 0.98126600  |
| C | 3.77758500  | 0.35788700  | -0.11803400 |
| H | 3.70448600  | 1.17688300  | 0.60928900  |
| H | 3.80211000  | 0.83300100  | -1.10736400 |
| C | 5.08867800  | -0.40312000 | 0.10947900  |
| H | 5.17072300  | -1.21198100 | -0.62817300 |
| H | 5.05703700  | -0.89149500 | 1.09218700  |
| C | 6.33620800  | 0.48378100  | 0.02798000  |
| H | 6.25553800  | 1.28991000  | 0.76898000  |
| H | 6.36789200  | 0.97647100  | -0.95270900 |
| C | 7.64868000  | -0.27594300 | 0.25192800  |
| H | 7.73455100  | -1.07536400 | -0.49420400 |
| H | 7.61411900  | -0.77496500 | 1.22814300  |
| C | 8.88780500  | 0.62155900  | 0.18253500  |
| H | 8.84934000  | 1.40764800  | 0.94332500  |
| H | 9.80606500  | 0.04956100  | 0.34278000  |
| H | 8.96777500  | 1.11103000  | -0.79337000 |

**TS61:  $\text{H} + \text{CH}_3(\text{CH}_2)_{13}\text{CH}_3 \rightarrow \text{H}_2 + \text{CH}_3(\text{CH}_2)_3\text{CH}(\text{CH}_2)_9\text{CH}_3$**

|   |             |             |             |
|---|-------------|-------------|-------------|
| C | -8.92595400 | 0.45415400  | -0.09777000 |
| H | -8.95862400 | 0.91926300  | -1.08818100 |
| H | -8.94715000 | 1.25794300  | 0.64487600  |
| H | -9.84041500 | -0.13323000 | 0.02300700  |
| C | -7.67645300 | -0.41630600 | 0.06395800  |
| H | -7.69094100 | -0.89566900 | 1.05032500  |
| H | -7.70208800 | -1.23115000 | -0.67010600 |
| C | -6.36893600 | 0.36715000  | -0.09517300 |
| H | -6.35645400 | 0.85448100  | -1.07867000 |
| H | -6.33777100 | 1.17485400  | 0.64614800  |
| C | -5.11398500 | -0.50146300 | 0.05220700  |
| H | -5.13807400 | -1.30226300 | -0.70320600 |
| H | -5.13050000 | -1.01111700 | 1.02443700  |
| C | -3.81367900 | 0.26326700  | -0.08890900 |
| H | -3.79954600 | 1.10242100  | 0.92739100  |
| H | -3.81048400 | 0.95385800  | -0.93799300 |

|   |             |             |             |
|---|-------------|-------------|-------------|
| C | -2.52995500 | -0.53170400 | 0.03495900  |
| H | -2.51582600 | -1.30277400 | -0.75110300 |
| H | -2.53172500 | -1.07868400 | 0.98669200  |
| C | -1.25622700 | 0.31624900  | -0.06850900 |
| H | -1.26334000 | 1.07278900  | 0.72513800  |
| H | -1.26655700 | 0.86819000  | -1.01709000 |
| C | 0.03341400  | -0.50672900 | 0.02392900  |
| H | 0.04551000  | -1.25304800 | -0.78113400 |
| H | 0.03425800  | -1.07401900 | 0.96368500  |
| C | 1.30778500  | 0.34166600  | -0.05368600 |
| H | 1.30079000  | 1.07771200  | 0.76049900  |
| H | 1.30077200  | 0.92108300  | -0.98607300 |
| C | 2.59946700  | -0.48060600 | 0.01954600  |
| H | 2.61175100  | -1.20830600 | -0.80228600 |
| H | 2.60144700  | -1.06959800 | 0.94593700  |
| C | 3.87321600  | 0.37026800  | -0.04004700 |
| H | 3.86400100  | 1.09210300  | 0.78688400  |
| H | 3.86752500  | 0.96600100  | -0.96211600 |
| C | 5.16587600  | -0.45146600 | 0.02178400  |
| H | 5.17808600  | -1.16905100 | -0.80891300 |
| H | 5.16916600  | -1.05186400 | 0.94086700  |
| C | 6.43890100  | 0.40073000  | -0.02866900 |
| H | 6.42824500  | 1.11699300  | 0.80334000  |
| H | 6.43573800  | 1.00318100  | -0.94657900 |
| C | 7.73286400  | -0.41919700 | 0.03053100  |
| H | 7.74532200  | -1.13364900 | -0.80164400 |
| H | 7.73602900  | -1.02146400 | 0.94730500  |
| C | 8.99839300  | 0.44203100  | -0.01816900 |
| H | 9.03104900  | 1.14437600  | 0.82083900  |
| H | 9.90251300  | -0.17158500 | 0.02755100  |
| H | 9.04190100  | 1.02905100  | -0.94113600 |
| H | -3.79295600 | 1.66490800  | 1.71541500  |

**H-R62:  $\text{H} + \text{CH}_3(\text{CH}_2)_{13}\text{CH}_3 \rightarrow \text{H}_2 + \text{CH}_3(\text{CH}_2)_4\text{CH}(\text{CH}_2)_8\text{CH}_3$**   
 **$\text{CH}_3(\text{CH}_2)_4\text{CH}(\text{CH}_2)_8\text{CH}_3$**

|   |            |             |             |
|---|------------|-------------|-------------|
| C | 8.98291700 | -0.05342000 | 0.31948900  |
| H | 9.16458700 | -0.79009900 | -0.46957900 |
| H | 9.00462200 | -0.58379900 | 1.27684300  |
| H | 9.81813700 | 0.65253000  | 0.31263600  |
| C | 7.64407600 | 0.66069700  | 0.11234800  |
| H | 7.50771800 | 1.41575900  | 0.89620800  |
| H | 7.66663500 | 1.21000800  | -0.83681400 |
| C | 6.44218600 | -0.29074300 | 0.11475500  |

|   |             |             |             |
|---|-------------|-------------|-------------|
| H | 6.57922800  | -1.04631500 | -0.67011700 |
| H | 6.42059100  | -0.84146800 | 1.06438300  |
| C | 5.09880500  | 0.41624400  | -0.09131000 |
| H | 5.12064000  | 0.96764500  | -1.03982100 |
| H | 4.95667000  | 1.16711700  | 0.69544400  |
| C | 3.89722600  | -0.53842900 | -0.09564700 |
| H | 3.87296500  | -1.10376100 | 0.84879500  |
| H | 4.05842100  | -1.30807600 | -0.87341400 |
| C | 2.58096100  | 0.13150800  | -0.31129000 |
| H | 2.56784900  | 1.12208300  | -0.75965800 |
| C | 1.29402600  | -0.61552500 | -0.19543000 |
| H | 1.31324800  | -1.24793100 | 0.70487800  |
| H | 1.19887200  | -1.33003500 | -1.03454500 |
| C | 0.04599900  | 0.27805300  | -0.16906800 |
| H | 0.03916500  | 0.90899100  | -1.06689500 |
| H | 0.11415300  | 0.96282200  | 0.68483900  |
| C | -1.26773500 | -0.50680500 | -0.09191300 |
| H | -1.25830700 | -1.14266900 | 0.80297100  |
| H | -1.33126100 | -1.19046500 | -0.94859500 |
| C | -2.51418000 | 0.38492800  | -0.06422400 |
| H | -2.51987300 | 1.02559800  | -0.95563600 |
| H | -2.45418400 | 1.06391600  | 0.79623600  |
| C | -3.82983900 | -0.39910600 | 0.00177600  |
| H | -3.82476900 | -1.04029000 | 0.89281300  |
| H | -3.88926700 | -1.07765700 | -0.85916100 |
| C | -5.07631800 | 0.49274700  | 0.02837000  |
| H | -5.07856200 | 1.13714200  | -0.86040400 |
| H | -5.01936500 | 1.16824000  | 0.89188700  |
| C | -6.39249100 | -0.29062000 | 0.08655100  |
| H | -6.39158900 | -0.93589200 | 0.97486400  |
| H | -6.45059000 | -0.96559200 | -0.77749700 |
| C | -7.63940500 | 0.60070700  | 0.11339500  |
| H | -7.63985100 | 1.24640500  | -0.77329900 |
| H | -7.58309200 | 1.27329700  | 0.97804900  |
| C | -8.94940300 | -0.19081600 | 0.16833100  |
| H | -8.99276100 | -0.82214100 | 1.06159000  |
| H | -9.81796400 | 0.47343200  | 0.18921300  |
| H | -9.05302100 | -0.84531800 | -0.70300900 |

**TS62:  $\text{H} + \text{CH}_3(\text{CH}_2)_{13}\text{CH}_3 \rightarrow \text{H}_2 + \text{CH}_3(\text{CH}_2)_4\text{CH}(\text{CH}_2)_8\text{CH}_3$**

|   |             |             |             |
|---|-------------|-------------|-------------|
| C | -8.96090100 | -0.29861900 | 0.08057500  |
| H | -9.01326200 | -0.74647200 | 1.07804200  |
| H | -9.03987300 | -1.11039100 | -0.64968800 |

|   |             |             |             |
|---|-------------|-------------|-------------|
| H | -9.83799000 | 0.34311000  | -0.04103500 |
| C | -7.66074300 | 0.48909100  | -0.10436300 |
| H | -7.65559400 | 0.95817600  | -1.09586400 |
| H | -7.62627900 | 1.31153700  | 0.62042100  |
| C | -6.40229800 | -0.37221900 | 0.05147600  |
| H | -6.41377500 | -0.85144500 | 1.03911700  |
| H | -6.43155400 | -1.18885300 | -0.68205200 |
| C | -5.09698000 | 0.41327300  | -0.11317000 |
| H | -5.06132000 | 1.21807300  | 0.63090300  |
| H | -5.08949900 | 0.90395400  | -1.09490900 |
| C | -3.84005100 | -0.45454500 | 0.02412400  |
| H | -3.86276300 | -1.24743600 | -0.73953900 |
| H | -3.85460200 | -0.97430900 | 0.99099300  |
| C | -2.54194200 | 0.31530900  | -0.10933700 |
| H | -2.52964000 | 1.14165800  | 0.91714500  |
| H | -2.54147600 | 1.01615400  | -0.94999300 |
| C | -1.25549400 | -0.47682400 | 0.00416200  |
| H | -1.23723600 | -1.23589800 | -0.79337900 |
| H | -1.25641500 | -1.03797700 | 0.94760400  |
| C | 0.01491700  | 0.37783900  | -0.08453500 |
| H | 0.00198600  | 1.12390700  | 0.71887200  |
| H | 0.00498900  | 0.94209100  | -1.02585300 |
| C | 1.30803300  | -0.44034000 | 0.00151200  |
| H | 1.32640600  | -1.17627100 | -0.81293300 |
| H | 1.30844400  | -1.01954300 | 0.93397300  |
| C | 2.57849900  | 0.41516500  | -0.06084800 |
| H | 2.56368900  | 1.14262200  | 0.76091800  |
| H | 2.57319900  | 1.00427700  | -0.98715200 |
| C | 3.87395200  | -0.40128700 | 0.01052400  |
| H | 3.89344700  | -1.12157000 | -0.81766900 |
| H | 3.87492100  | -0.99850400 | 0.93162400  |
| C | 5.14372100  | 0.45637800  | -0.03602000 |
| H | 5.12640700  | 1.17235300  | 0.79590000  |
| H | 5.14004900  | 1.05852200  | -0.95396000 |
| C | 6.43995800  | -0.35915300 | 0.02713400  |
| H | 6.45996700  | -1.07286600 | -0.80693600 |
| H | 6.44339800  | -0.96420500 | 0.94331900  |
| C | 7.71001300  | 0.49842300  | -0.01419700 |
| H | 7.69135400  | 1.21023300  | 0.82007600  |
| H | 7.70652800  | 1.10347000  | -0.92913400 |
| C | 8.99973700  | -0.32521900 | 0.04756600  |
| H | 9.06390500  | -1.02319200 | -0.79330400 |
| H | 9.88572100  | 0.31512400  | 0.01538500  |



|   |             |             |            |
|---|-------------|-------------|------------|
| H | 9.04910400  | -0.91408300 | 0.96905800 |
| H | -2.52475400 | 1.69412000  | 1.71242700 |

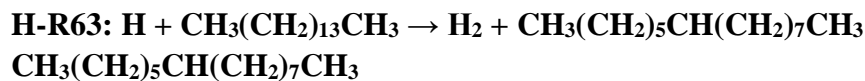

|   |             |             |             |
|---|-------------|-------------|-------------|
| C | 8.87520200  | -0.81168900 | 0.22327300  |
| H | 8.96003800  | -1.23965000 | -0.78074500 |
| H | 8.76434900  | -1.64258000 | 0.92726900  |
| H | 9.81929600  | -0.30839700 | 0.44997800  |
| C | 7.68902800  | 0.15280200  | 0.31559500  |
| H | 7.65433900  | 0.59312400  | 1.31963000  |
| H | 7.84331900  | 0.98894600  | -0.37727000 |
| C | 6.34202200  | -0.51244800 | 0.01050900  |
| H | 6.37767400  | -0.95359500 | -0.99431000 |
| H | 6.18883900  | -1.34999000 | 0.70352100  |
| C | 5.14732800  | 0.44355300  | 0.10076400  |
| H | 5.30177000  | 1.28189900  | -0.59096900 |
| H | 5.11154000  | 0.88269800  | 1.10636500  |
| C | 3.80344300  | -0.22512800 | -0.20700800 |
| H | 3.64665600  | -1.06474800 | 0.48067900  |
| H | 3.83585700  | -0.65760700 | -1.21505200 |
| C | 2.60533000  | 0.73044400  | -0.11150100 |
| H | 2.78913100  | 1.59302700  | -0.77943000 |
| H | 2.56036700  | 1.16577200  | 0.89777100  |
| C | 1.29306300  | 0.10168300  | -0.44402000 |
| H | 1.28574300  | -0.75454000 | -1.11478800 |
| C | -0.00287900 | 0.77999500  | -0.14665300 |
| H | -0.13625200 | 1.64835900  | -0.81896000 |
| H | 0.03139500  | 1.21400900  | 0.86359600  |
| C | -1.23325000 | -0.12973400 | -0.27476600 |
| H | -1.12741900 | -0.97387100 | 0.41713700  |
| H | -1.25427100 | -0.56188700 | -1.28326600 |
| C | -2.55859600 | 0.59012500  | -0.00440500 |
| H | -2.66164400 | 1.43312800  | -0.70000100 |
| H | -2.53405800 | 1.02855500  | 1.00181800  |
| C | -3.78591100 | -0.32007700 | -0.12808500 |
| H | -3.68349300 | -1.16145000 | 0.56935400  |
| H | -3.80878500 | -0.76084600 | -1.13324700 |
| C | -5.11396800 | 0.39782200  | 0.13815700  |
| H | -5.21684900 | 1.23883600  | -0.55980100 |
| H | -5.09136000 | 0.83903300  | 1.14316700  |
| C | -6.34033000 | -0.51345900 | 0.01468300  |
| H | -6.23848000 | -1.35452100 | 0.71293100  |

|   |             |             |             |
|---|-------------|-------------|-------------|
| H | -6.36335700 | -0.95543800 | -0.99014500 |
| C | -7.66976100 | 0.20242100  | 0.27960200  |
| H | -7.77212400 | 1.04238800  | -0.41827800 |
| H | -7.64788700 | 0.64331100  | 1.28375600  |
| C | -8.88833300 | -0.71681800 | 0.15355100  |
| H | -8.83096100 | -1.54855800 | 0.86289800  |
| H | -9.81914600 | -0.17719400 | 0.34965100  |
| H | -8.95855100 | -1.14516400 | -0.85143300 |

**TS63:  $\text{H} + \text{CH}_3(\text{CH}_2)_{13}\text{CH}_3 \rightarrow \text{H}_2 + \text{CH}_3(\text{CH}_2)_5\text{CH}(\text{CH}_2)_7\text{CH}_3$**

|   |             |             |             |
|---|-------------|-------------|-------------|
| C | 8.94715700  | -0.48265700 | -0.04473000 |
| H | 8.99083400  | -0.97034400 | -1.02381800 |
| H | 8.96076400  | -1.26942500 | 0.71621900  |
| H | 9.86016400  | 0.10781400  | 0.07255700  |
| C | 7.69511100  | 0.38996600  | 0.08350400  |
| H | 7.69819800  | 0.89147600  | 1.05899800  |
| H | 7.72856400  | 1.18830100  | -0.66803400 |
| C | 6.38897500  | -0.39679600 | -0.07357500 |
| H | 6.38754600  | -0.90254900 | -1.04808500 |
| H | 6.35535100  | -1.19347400 | 0.68099400  |
| C | 5.12981300  | 0.46848800  | 0.04912500  |
| H | 5.15887200  | 1.25917800  | -0.71203400 |
| H | 5.13700800  | 0.98116900  | 1.01972400  |
| C | 3.82603700  | -0.32455200 | -0.09216900 |
| H | 3.79251900  | -1.10784200 | 0.67450500  |
| H | 3.81924400  | -0.84303400 | -1.05948100 |
| C | 2.56703600  | 0.54376800  | 0.02150900  |
| H | 2.59088600  | 1.31968300  | -0.75938200 |
| H | 2.57720800  | 1.08453500  | 0.97683000  |
| C | 1.27103100  | -0.23152400 | -0.10018500 |
| H | 1.26228000  | -1.04547200 | 0.93614800  |
| H | 1.27158100  | -0.94229900 | -0.93245600 |
| C | -0.01805500 | 0.55730700  | 0.00665400  |
| H | -0.03655600 | 1.31410200  | -0.79300400 |
| H | -0.02166400 | 1.12106900  | 0.94856500  |
| C | -1.28505800 | -0.30222200 | -0.08333600 |
| H | -1.26730300 | -1.05195000 | 0.71659200  |
| H | -1.27439600 | -0.86207900 | -1.02727000 |
| C | -2.58183000 | 0.50939000  | 0.00934500  |
| H | -2.60293900 | 1.25343900  | -0.79762300 |
| H | -2.58572800 | 1.07902200  | 0.94767100  |
| C | -3.84805200 | -0.35160900 | -0.06302500 |
| H | -3.82721700 | -1.09165900 | 0.74728900  |

|   |             |             |             |
|---|-------------|-------------|-------------|
| H | -3.84197200 | -0.92622800 | -0.99837300 |
| C | -5.14787300 | 0.45627200  | 0.02466900  |
| H | -5.17237700 | 1.19202800  | -0.78970900 |
| H | -5.15120700 | 1.03579900  | 0.95702900  |
| C | -6.41264700 | -0.40743400 | -0.03688800 |
| H | -6.38852900 | -1.14275200 | 0.77800800  |
| H | -6.41012300 | -0.98819200 | -0.96866700 |
| C | -7.71437200 | 0.39743700  | 0.05090400  |
| H | -7.74079200 | 1.13072500  | -0.76440100 |
| H | -7.71661800 | 0.97829000  | 0.98138900  |
| C | -8.97130000 | -0.47567800 | -0.00806800 |
| H | -8.99019000 | -1.19733100 | 0.81480100  |
| H | -9.88127300 | 0.12725700  | 0.05859800  |
| H | -9.01600100 | -1.04180000 | -0.94394000 |
| H | 1.25802500  | -1.58839500 | 1.73794900  |

**H-R64:  $\text{H} + \text{CH}_3(\text{CH}_2)_{13}\text{CH}_3 \rightarrow \text{H}_2 + \text{CH}_3(\text{CH}_2)_6\text{CH}(\text{CH}_2)_6\text{CH}_3$**   
 **$\text{CH}_3(\text{CH}_2)_6\text{CH}(\text{CH}_2)_6\text{CH}_3$**

|   |             |             |             |
|---|-------------|-------------|-------------|
| C | 8.93968500  | -0.01366500 | 0.41737600  |
| H | 9.11870400  | -0.80394400 | -0.31862100 |
| H | 8.94508800  | -0.47884900 | 1.40828700  |
| H | 9.78446300  | 0.67940000  | 0.37192100  |
| C | 7.61249200  | 0.70184400  | 0.14874000  |
| H | 7.47730100  | 1.50788500  | 0.88026600  |
| H | 7.65256600  | 1.18783100  | -0.83382100 |
| C | 6.39828900  | -0.23270300 | 0.19915000  |
| H | 6.53400500  | -1.03958300 | -0.53290700 |
| H | 6.35905700  | -0.71964300 | 1.18244000  |
| C | 5.06509700  | 0.47470800  | -0.06830900 |
| H | 5.10480600  | 0.96071100  | -1.05187500 |
| H | 4.93105100  | 1.28198500  | 0.66331000  |
| C | 3.85157500  | -0.46048100 | -0.01573000 |
| H | 3.81275600  | -0.94616200 | 0.96808500  |
| H | 3.98509200  | -1.26808600 | -0.74723200 |
| C | 2.51931900  | 0.24818200  | -0.28175500 |
| H | 2.55256900  | 0.72588000  | -1.26914500 |
| H | 2.38422900  | 1.05810400  | 0.44508600  |
| C | 1.30410000  | -0.68837900 | -0.21933700 |
| H | 1.26157800  | -1.17106300 | 0.76822600  |
| H | 1.46497500  | -1.52088700 | -0.92995800 |
| C | 0.00000000  | -0.02101800 | -0.50550800 |
| H | 0.00000000  | 0.86487300  | -1.13664200 |
| C | -1.30410000 | -0.68838000 | -0.21934000 |

|   |             |             |             |
|---|-------------|-------------|-------------|
| H | -1.26157900 | -1.17106600 | 0.76822200  |
| H | -1.46497400 | -1.52088600 | -0.92996300 |
| C | -2.51931900 | 0.24818200  | -0.28175600 |
| H | -2.55256700 | 0.72588400  | -1.26914400 |
| H | -2.38423000 | 1.05810100  | 0.44508700  |
| C | -3.85157500 | -0.46048200 | -0.01573600 |
| H | -3.81275700 | -0.94616900 | 0.96807600  |
| H | -3.98509300 | -1.26808300 | -0.74724300 |
| C | -5.06509700 | 0.47470800  | -0.06830900 |
| H | -5.10480500 | 0.96071800  | -1.05187200 |
| H | -4.93105000 | 1.28198000  | 0.66331500  |
| C | -6.39828900 | -0.23270400 | 0.19914600  |
| H | -6.35905600 | -0.71965300 | 1.18243200  |
| H | -6.53400700 | -1.03957700 | -0.53291800 |
| C | -7.61249200 | 0.70184600  | 0.14874700  |
| H | -7.65256600 | 1.18784200  | -0.83381000 |
| H | -7.47729900 | 1.50787900  | 0.88028000  |
| C | -8.93968500 | -0.01366400 | 0.41737700  |
| H | -8.94508800 | -0.47885700 | 1.40828400  |
| H | -9.78446200 | 0.67940100  | 0.37192900  |
| H | -9.11870600 | -0.80393700 | -0.31862700 |

**TS64:  $\text{H} + \text{CH}_3(\text{CH}_2)_{13}\text{CH}_3 \rightarrow \text{H}_2 + \text{CH}_3(\text{CH}_2)_6\text{CH}(\text{CH}_2)_6\text{CH}_3$**

|   |             |             |             |
|---|-------------|-------------|-------------|
| C | -8.98085000 | -0.28299300 | 0.09901000  |
| H | -9.02598600 | -0.80896500 | 1.05799000  |
| H | -9.06544400 | -1.03406900 | -0.69292900 |
| H | -9.85869500 | 0.36612700  | 0.03537800  |
| C | -7.68156800 | 0.51694600  | -0.03254900 |
| H | -7.68323500 | 1.06259600  | -0.98409900 |
| H | -7.64181200 | 1.27988600  | 0.75443500  |
| C | -6.42198400 | -0.35338700 | 0.04642200  |
| H | -6.42348000 | -0.90402100 | 0.99628200  |
| H | -6.45939800 | -1.11391300 | -0.74458500 |
| C | -5.11709700 | 0.44129100  | -0.07532400 |
| H | -5.08171500 | 1.20061800  | 0.71650900  |
| H | -5.11673800 | 0.99299100  | -1.02442300 |
| C | -3.85661900 | -0.42755000 | 0.00418500  |
| H | -3.88670400 | -1.18320900 | -0.79162100 |
| H | -3.86009600 | -0.98322600 | 0.95082300  |
| C | -2.55488700 | 0.37388200  | -0.10540500 |
| H | -2.52536300 | 1.12874800  | 0.68936500  |
| H | -2.54804400 | 0.92741800  | -1.05310200 |
| C | -1.29291800 | -0.49349900 | -0.02023800 |

|   |             |             |             |
|---|-------------|-------------|-------------|
| H | -1.31580600 | -1.24617200 | -0.82359900 |
| H | -1.29925200 | -1.06193800 | 0.91887800  |
| C | -0.00000900 | 0.28973800  | -0.12231500 |
| H | -0.00004100 | 1.08676300  | 0.92712600  |
| H | -0.00000300 | 1.01381300  | -0.94303700 |
| C | 1.29292900  | -0.49345400 | -0.02025300 |
| H | 1.31610800  | -1.24566100 | -0.82404400 |
| H | 1.29902300  | -1.06243300 | 0.91853600  |
| C | 2.55487500  | 0.37405000  | -0.10454200 |
| H | 2.52539700  | 1.12801900  | 0.69107700  |
| H | 2.54795900  | 0.92865400  | -1.05161400 |
| C | 3.85662300  | -0.42749900 | 0.00400500  |
| H | 3.88681400  | -1.18193500 | -0.79295700 |
| H | 3.86001900  | -0.98463000 | 0.94978900  |
| C | 5.11708200  | 0.44150200  | -0.07402900 |
| H | 5.08188800  | 1.19921400  | 0.71935500  |
| H | 5.11651200  | 0.99513200  | -1.02200400 |
| C | 6.42199200  | -0.35344000 | 0.04576600  |
| H | 6.45930800  | -1.11213400 | -0.74700400 |
| H | 6.42360400  | -0.90626900 | 0.99435000  |
| C | 7.68156100  | 0.51708100  | -0.03134300 |
| H | 7.64206500  | 1.27797600  | 0.75762900  |
| H | 7.68294400  | 1.06519500  | -0.98147600 |
| C | 8.98087100  | -0.28322500 | 0.09773100  |
| H | 9.06526000  | -1.03213400 | -0.69627700 |
| H | 9.85870500  | 0.36606100  | 0.03565700  |
| H | 9.02623100  | -0.81180900 | 1.05526300  |
| H | -0.00002300 | 1.61664800  | 1.73758500  |

### 2.1.16 C16 (*n*-C<sub>16</sub>H<sub>34</sub>)

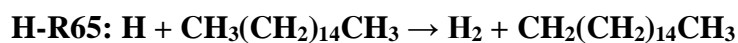

*n*-C<sub>16</sub>H<sub>34</sub>

|   |              |             |             |
|---|--------------|-------------|-------------|
| C | -9.62090800  | 0.33619200  | -0.00000600 |
| H | -9.67291100  | 0.98132900  | -0.88292200 |
| H | -9.67291500  | 0.98132800  | 0.88291000  |
| H | -10.51166600 | -0.29841800 | -0.00000900 |
| C | -8.33700800  | -0.49893100 | -0.00000400 |
| H | -8.33058100  | -1.15877000 | 0.87625200  |
| H | -8.33057900  | -1.15877000 | -0.87626000 |
| C | -7.06095300  | 0.35062700  | -0.00000300 |
| H | -7.06817000  | 1.01147600  | 0.87681100  |
| H | -7.06816700  | 1.01147500  | -0.87681900 |
| C | -5.76992600  | -0.47560500 | -0.00000100 |

|   |             |             |             |
|---|-------------|-------------|-------------|
| H | -5.76367800 | -1.13622500 | -0.87681800 |
| H | -5.76368000 | -1.13622300 | 0.87681800  |
| C | -4.49484600 | 0.37538400  | 0.00000000  |
| H | -4.50122300 | 1.03602300  | 0.87677100  |
| H | -4.50122000 | 1.03602000  | -0.87677300 |
| C | -3.20360300 | -0.45083400 | 0.00000300  |
| H | -3.19718800 | -1.11146900 | -0.87678200 |
| H | -3.19719000 | -1.11146700 | 0.87679000  |
| C | -1.92873500 | 0.40040500  | 0.00000400  |
| H | -1.93519700 | 1.06104700  | 0.87678600  |
| H | -1.93519500 | 1.06104600  | -0.87677800 |
| C | -0.63740500 | -0.42565700 | 0.00000600  |
| H | -0.63092800 | -1.08629500 | -0.87678000 |
| H | -0.63093000 | -1.08629400 | 0.87679200  |
| C | 0.63740500  | 0.42565700  | 0.00000600  |
| H | 0.63092900  | 1.08629400  | 0.87679200  |
| H | 0.63092900  | 1.08629500  | -0.87677900 |
| C | 1.92873500  | -0.40040500 | 0.00000600  |
| H | 1.93519500  | -1.06104600 | -0.87677600 |
| H | 1.93519600  | -1.06104600 | 0.87678800  |
| C | 3.20360300  | 0.45083400  | 0.00000500  |
| H | 3.19719000  | 1.11146800  | 0.87679100  |
| H | 3.19718800  | 1.11146900  | -0.87678000 |
| C | 4.49484600  | -0.37538400 | 0.00000300  |
| H | 4.50122000  | -1.03602100 | -0.87676800 |
| H | 4.50122300  | -1.03602100 | 0.87677500  |
| C | 5.76992600  | 0.47560500  | 0.00000100  |
| H | 5.76368100  | 1.13622400  | 0.87681900  |
| H | 5.76367700  | 1.13622500  | -0.87681700 |
| C | 7.06095300  | -0.35062700 | -0.00000200 |
| H | 7.06816600  | -1.01147500 | -0.87681800 |
| H | 7.06817100  | -1.01147600 | 0.87681200  |
| C | 8.33700800  | 0.49893100  | -0.00000600 |
| H | 8.33058200  | 1.15876900  | 0.87625100  |
| H | 8.33057700  | 1.15877000  | -0.87626100 |
| C | 9.62090800  | -0.33619200 | -0.00000900 |
| H | 9.67291100  | -0.98132800 | -0.88292600 |
| H | 10.51166600 | 0.29841800  | -0.00001200 |
| H | 9.67291500  | -0.98132900 | 0.88290600  |

**CH<sub>2</sub>(CH<sub>2</sub>)<sub>14</sub>CH<sub>3</sub>**

|   |             |            |             |
|---|-------------|------------|-------------|
| C | -9.67282200 | 0.30986100 | -0.00058200 |
| H | -9.70410700 | 1.30046500 | 0.43928400  |

|   |              |             |             |
|---|--------------|-------------|-------------|
| H | -10.61045200 | -0.12927500 | -0.31949000 |
| C | -8.41223700  | -0.48312200 | -0.00254200 |
| H | -8.38078700  | -1.13611900 | 0.88873200  |
| H | -8.40904400  | -1.17497400 | -0.85535900 |
| C | -7.13493800  | 0.37081800  | -0.02222200 |
| H | -7.14936500  | 1.05384800  | 0.83654200  |
| H | -7.14235000  | 1.00443800  | -0.91711100 |
| C | -5.84646100  | -0.45782000 | 0.00778100  |
| H | -5.83718900  | -1.14305600 | -0.84984000 |
| H | -5.84469900  | -1.09292800 | 0.90326700  |
| C | -4.57074300  | 0.39182800  | -0.01181700 |
| H | -4.57778500  | 1.07445200  | 0.84781000  |
| H | -4.57494400  | 1.02965100  | -0.90517400 |
| C | -3.28084200  | -0.43620200 | 0.01114600  |
| H | -3.27384900  | -1.11783700 | -0.84931700 |
| H | -3.27705600  | -1.07525700 | 0.90373300  |
| C | -2.00470600  | 0.41293900  | -0.00729600 |
| H | -2.01048100  | 1.09302900  | 0.85439900  |
| H | -2.00969400  | 1.05364300  | -0.89869000 |
| C | -0.71489400  | -0.41529400 | 0.01176500  |
| H | -0.70920400  | -1.09496500 | -0.85027800 |
| H | -0.71010200  | -1.05650700 | 0.90281400  |
| C | 0.56156700   | 0.43338300  | -0.00631900 |
| H | 0.55659100   | 1.11227400  | 0.85634100  |
| H | 0.55624800   | 1.07538200  | -0.89679500 |
| C | 1.85114100   | -0.39526800 | 0.01080800  |
| H | 1.85592800   | -1.07409300 | -0.85191100 |
| H | 1.85640800   | -1.03739000 | 0.90120200  |
| C | 3.12791000   | 0.45294400  | -0.00740200 |
| H | 3.12346400   | 1.13154600  | 0.85549100  |
| H | 3.12255500   | 1.09525800  | -0.89765400 |
| C | 4.41718800   | -0.37618100 | 0.00908900  |
| H | 4.42133800   | -1.05503600 | -0.85359900 |
| H | 4.42265400   | -1.01826400 | 0.89949900  |
| C | 5.69430700   | 0.47153500  | -0.00976200 |
| H | 5.69020800   | 1.15067200  | 0.85273600  |
| H | 5.68912200   | 1.11328100  | -0.90045100 |
| C | 6.98324900   | -0.35773600 | 0.00716100  |
| H | 6.98785700   | -1.03780900 | -0.85478000 |
| H | 6.98988000   | -0.99899100 | 0.89836600  |
| C | 8.26134300   | 0.48853800  | -0.01322000 |
| H | 8.25733900   | 1.16815000  | 0.84773000  |
| H | 8.25569100   | 1.12817300  | -0.90429700 |

|   |             |             |             |
|---|-------------|-------------|-------------|
| C | 9.54315600  | -0.34947700 | 0.00479100  |
| H | 9.59218100  | -1.01559800 | -0.86250500 |
| H | 10.43536300 | 0.28277700  | -0.01171200 |
| H | 9.59496900  | -0.97342800 | 0.90275300  |

**TS65:  $\text{H} + \text{CH}_3(\text{CH}_2)_{14}\text{CH}_3 \rightarrow \text{H}_2 + \text{CH}_2(\text{CH}_2)_{14}\text{CH}_3$**

|   |             |             |             |
|---|-------------|-------------|-------------|
| C | 9.53419300  | 0.23291300  | -0.19244200 |
| H | 9.62639400  | 1.10982800  | 0.85167200  |
| H | 9.55955400  | 0.90355200  | -1.05203800 |
| H | 10.45946100 | -0.33132800 | -0.07904400 |
| C | 8.25642100  | -0.54876800 | -0.00571300 |
| H | 8.21542700  | -1.34847900 | -0.76129900 |
| H | 8.27757300  | -1.06121100 | 0.96405300  |
| C | 6.98647200  | 0.30527200  | -0.11121100 |
| H | 6.98141500  | 0.82198300  | -1.07955900 |
| H | 7.01810200  | 1.09055000  | 0.65361800  |
| C | 5.69341100  | -0.50316800 | 0.03859500  |
| H | 5.70468200  | -1.02976600 | 1.00167000  |
| H | 5.66323400  | -1.28318500 | -0.73342500 |
| C | 4.42292200  | 0.34941900  | -0.05555300 |
| H | 4.42245600  | 0.89341600  | -1.00904600 |
| H | 4.44287400  | 1.11533600  | 0.73038400  |
| C | 3.12835700  | -0.46314700 | 0.06125000  |
| H | 3.13174100  | -1.01605300 | 1.00959700  |
| H | 3.10637600  | -1.22195800 | -0.73177200 |
| C | 1.85703800  | 0.38944600  | -0.02155900 |
| H | 1.86321300  | 0.95740500  | -0.96100100 |
| H | 1.86895500  | 1.13547100  | 0.78357800  |
| C | 0.56288900  | -0.42768900 | 0.06457900  |
| H | 0.55896900  | -1.00244300 | 0.99987700  |
| H | 0.54955400  | -1.16805000 | -0.74586200 |
| C | -0.70948300 | 0.42409400  | -0.00988400 |
| H | -0.69907000 | 1.00909700  | -0.93878100 |
| H | -0.70347400 | 1.15540500  | 0.80874500  |
| C | -2.00270900 | -0.39652300 | 0.05462200  |
| H | -2.01165100 | -0.98569600 | 0.98088300  |
| H | -2.00940200 | -1.12431000 | -0.76719900 |
| C | -3.27609600 | 0.45414100  | -0.01490100 |
| H | -3.26365100 | 1.04890200  | -0.93755800 |
| H | -3.27368700 | 1.17684700  | 0.81137100  |
| C | -4.56840400 | -0.36879000 | 0.03742500  |
| H | -4.58028800 | -0.96526700 | 0.95895900  |
| H | -4.57081200 | -1.09006200 | -0.79012600 |



|   |              |             |             |
|---|--------------|-------------|-------------|
| C | -5.84262400  | 0.48079000  | -0.03048900 |
| H | -5.82956800  | 1.07909600  | -0.95086500 |
| H | -5.84201600  | 1.20033400  | 0.79857700  |
| C | -7.13423600  | -0.34313200 | 0.01728800  |
| H | -7.14894500  | -0.94096400 | 0.93810100  |
| H | -7.13501800  | -1.06357800 | -0.81120900 |
| C | -8.40963000  | 0.50456800  | -0.05277100 |
| H | -8.39567500  | 1.10078900  | -0.97339300 |
| H | -8.40991300  | 1.22449600  | 0.77473700  |
| C | -9.69406300  | -0.32821400 | -0.00408700 |
| H | -9.75499300  | -0.90722600 | 0.92294000  |
| H | -10.58419700 | 0.30481300  | -0.05881600 |
| H | -9.73822000  | -1.03593300 | -0.83807100 |
| H | 9.67383300   | 1.68091400  | 1.57939900  |

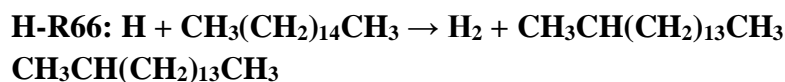

|   |             |             |             |
|---|-------------|-------------|-------------|
| C | 9.70781000  | -0.19378000 | 0.17998500  |
| H | 10.03190900 | -0.77763800 | -0.69864000 |
| H | 9.68812100  | -0.89859000 | 1.02074200  |
| H | 10.48860900 | 0.54555300  | 0.37556400  |
| C | 8.37697500  | 0.44284000  | -0.03301400 |
| H | 8.33708900  | 1.46914400  | -0.38647500 |
| C | 7.12329600  | -0.36665100 | -0.05392500 |
| H | 7.12985200  | -1.07529400 | 0.78804600  |
| H | 7.10497700  | -1.00736500 | -0.95565400 |
| C | 5.83338500  | 0.46454400  | -0.01619300 |
| H | 5.83125600  | 1.16043700  | -0.86463800 |
| H | 5.83434500  | 1.08506300  | 0.88807400  |
| C | 4.55776200  | -0.38359000 | -0.05207500 |
| H | 4.56302100  | -1.08048200 | 0.79616200  |
| H | 4.56182800  | -1.00660300 | -0.95602100 |
| C | 3.26857400  | 0.44492400  | -0.01556100 |
| H | 3.26040300  | 1.13855500  | -0.86635500 |
| H | 3.26683300  | 1.07127500  | 0.88593200  |
| C | 1.99212400  | -0.40353100 | -0.04316900 |
| H | 2.00037400  | -1.09612900 | 0.80849600  |
| H | 1.99442400  | -1.03116900 | -0.94385200 |
| C | 0.70223700  | 0.42405000  | -0.00790200 |
| H | 0.69268600  | 1.11512400  | -0.86078800 |
| H | 0.70092200  | 1.05327700  | 0.89165900  |
| C | -0.57378200 | -0.42516300 | -0.03177400 |
| H | -0.56410900 | -1.11586600 | 0.82142400  |

|   |              |             |             |
|---|--------------|-------------|-------------|
| H | -0.57220900  | -1.05486000 | -0.93102600 |
| C | -1.86412300  | 0.40173500  | 0.00313400  |
| H | -1.87439000  | 1.09184900  | -0.85052800 |
| H | -1.86537900  | 1.03201300  | 0.90197000  |
| C | -3.13979500  | -0.44804200 | -0.01930700 |
| H | -3.12933000  | -1.13821800 | 0.83430700  |
| H | -3.13854400  | -1.07828900 | -0.91817300 |
| C | -4.43038200  | 0.37845700  | 0.01587700  |
| H | -4.44086000  | 1.06881700  | -0.83757400 |
| H | -4.43179800  | 1.00847100  | 0.91489000  |
| C | -5.70593300  | -0.47153400 | -0.00687300 |
| H | -5.69514100  | -1.16247200 | 0.84614500  |
| H | -5.70487900  | -1.10094300 | -0.90635000 |
| C | -6.99653500  | 0.35451900  | 0.02943700  |
| H | -7.00780400  | 1.04666000  | -0.82277900 |
| H | -6.99927600  | 0.98309200  | 0.92965900  |
| C | -8.27280000  | -0.49441000 | 0.00467400  |
| H | -8.26189400  | -1.18642700 | 0.85562100  |
| H | -8.27118500  | -1.12100900 | -0.89564400 |
| C | -9.55646100  | 0.34008400  | 0.04288300  |
| H | -9.61245300  | 1.01882300  | -0.81415200 |
| H | -10.44724000 | -0.29408100 | 0.02250700  |
| H | -9.60425900  | 0.95057300  | 0.95028000  |

**TS66:  $\text{H} + \text{CH}_3(\text{CH}_2)_{14}\text{CH}_3 \rightarrow \text{H}_2 + \text{CH}_3\text{CH}(\text{CH}_2)_{13}\text{CH}_3$**

|   |             |             |             |
|---|-------------|-------------|-------------|
| C | 9.57065100  | -0.33598000 | 0.01882200  |
| H | 9.68612700  | -1.12152700 | -0.73881600 |
| H | 9.61931200  | -0.81849000 | 0.99984100  |
| H | 10.42838000 | 0.33582900  | -0.07015000 |
| C | 8.26344900  | 0.40292300  | -0.16550900 |
| H | 8.25869700  | 1.33222000  | 0.76428900  |
| H | 8.23793800  | 1.01448400  | -1.07179000 |
| C | 6.99269400  | -0.39339900 | 0.04818000  |
| H | 7.01175000  | -0.84342600 | 1.04936400  |
| H | 6.98553300  | -1.23952100 | -0.65709500 |
| C | 5.70521800  | 0.42055700  | -0.12715000 |
| H | 5.70285300  | 0.88104000  | -1.12337900 |
| H | 5.70314800  | 1.24870000  | 0.59175200  |
| C | 4.42938500  | -0.41031600 | 0.04814200  |
| H | 4.44542800  | -0.89617600 | 1.03231500  |
| H | 4.42222700  | -1.22232200 | -0.69081800 |
| C | 3.14114800  | 0.40922300  | -0.08762700 |
| H | 3.14007000  | 0.92493400  | -1.05672000 |

|   |              |             |             |
|---|--------------|-------------|-------------|
| H | 3.13426600   | 1.19828900  | 0.67536000  |
| C | 1.86335400   | -0.42821900 | 0.03817100  |
| H | 1.87749300   | -0.97036900 | 0.99262300  |
| H | 1.85691200   | -1.19606900 | -0.74638500 |
| C | 0.57552900   | 0.39836500  | -0.05269600 |
| H | 0.57461300   | 0.96547100  | -0.99267100 |
| H | 0.56919400   | 1.14534600  | 0.75162900  |
| C | -0.70306200  | -0.44340200 | 0.02887300  |
| H | -0.69271500  | -1.02918400 | 0.95726600  |
| H | -0.70659000  | -1.17415400 | -0.79032300 |
| C | -1.99041000  | 0.38688900  | -0.02917000 |
| H | -1.99219400  | 0.98818200  | -0.94766000 |
| H | -1.99508300  | 1.10387500  | 0.80205400  |
| C | -3.26954000  | -0.45632600 | 0.02383700  |
| H | -3.26225200  | -1.06831400 | 0.93520400  |
| H | -3.27077300  | -1.16352000 | -0.81578700 |
| C | -4.55642900  | 0.37578700  | -0.01484700 |
| H | -4.55914800  | 0.99586500  | -0.92074600 |
| H | -4.55949000  | 1.07553900  | 0.83095700  |
| C | -5.83604500  | -0.46753400 | 0.02305100  |
| H | -5.83069000  | -1.09272100 | 0.92545200  |
| H | -5.83604500  | -1.16245100 | -0.82679200 |
| C | -7.12249100  | 0.36527700  | -0.00604000 |
| H | -7.12729500  | 0.99359600  | -0.90643500 |
| H | -7.12494200  | 1.05771800  | 0.84599200  |
| C | -8.40315800  | -0.47672700 | 0.02662600  |
| H | -8.39817800  | -1.10541200 | 0.92547900  |
| H | -8.40253000  | -1.16681100 | -0.82596200 |
| C | -9.68239200  | 0.36499900  | 0.00020200  |
| H | -9.73329300  | 0.97862000  | -0.90491000 |
| H | -10.57653900 | -0.26424300 | 0.02505100  |
| H | -9.72836400  | 1.04131600  | 0.85974000  |
| H | 8.27477000   | 1.98098100  | 1.48489000  |

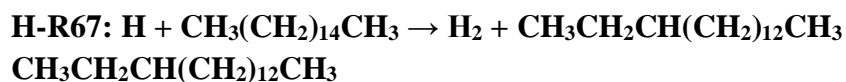

|   |              |             |             |
|---|--------------|-------------|-------------|
| C | -9.57611700  | 0.59998800  | 0.25199800  |
| H | -9.68605000  | 1.18428400  | -0.66658900 |
| H | -9.40147600  | 1.30083800  | 1.07319600  |
| H | -10.52575900 | 0.09151800  | 0.43876400  |
| C | -8.42215100  | -0.40207600 | 0.12985700  |
| H | -8.35644300  | -1.00694800 | 1.04588500  |
| H | -8.66441700  | -1.12973300 | -0.66614800 |

|   |             |             |             |
|---|-------------|-------------|-------------|
| C | -7.09759000 | 0.22795200  | -0.14695600 |
| H | -7.07865700 | 1.21395400  | -0.60573600 |
| C | -5.82819100 | -0.55504500 | -0.09129300 |
| H | -5.78275100 | -1.25834300 | -0.94394000 |
| H | -5.83119000 | -1.19987600 | 0.80004500  |
| C | -4.55675400 | 0.30570600  | -0.09902100 |
| H | -4.58060500 | 0.98603100  | 0.76073700  |
| H | -4.56145500 | 0.94247900  | -0.99272500 |
| C | -3.26195200 | -0.51301500 | -0.06676800 |
| H | -3.24176400 | -1.19338200 | -0.92812600 |
| H | -3.26037800 | -1.15317400 | 0.82510600  |
| C | -1.99324900 | 0.34727100  | -0.07245100 |
| H | -2.01448900 | 1.02801900  | 0.78842300  |
| H | -1.99454400 | 0.98711800  | -0.96447500 |
| C | -0.69593800 | -0.46870000 | -0.03849600 |
| H | -0.67435600 | -1.14956200 | -0.89935700 |
| H | -0.69436300 | -1.10838900 | 0.85365600  |
| C | 0.57185700  | 0.39302200  | -0.04425800 |
| H | 0.54985900  | 1.07399700  | 0.81649400  |
| H | 0.56987600  | 1.03275500  | -0.93638600 |
| C | 1.87014600  | -0.42136900 | -0.01021500 |
| H | 1.89212200  | -1.10271000 | -0.87069200 |
| H | 1.87274800  | -1.06061800 | 0.88225800  |
| C | 3.13714800  | 0.44152600  | -0.01699400 |
| H | 3.11492400  | 1.12303300  | 0.84334200  |
| H | 3.13427300  | 1.08069200  | -0.90953000 |
| C | 4.43609600  | -0.37181200 | 0.01706600  |
| H | 4.45815900  | -1.05382700 | -0.84286300 |
| H | 4.43958800  | -1.01035400 | 0.91003200  |
| C | 5.70260400  | 0.49183800  | 0.00899100  |
| H | 5.68029100  | 1.17422700  | 0.86865400  |
| H | 5.69915000  | 1.13003900  | -0.88425700 |
| C | 7.00188900  | -0.32056000 | 0.04356500  |
| H | 7.02495100  | -1.00385800 | -0.81553600 |
| H | 7.00698900  | -0.95818600 | 0.93738600  |
| C | 8.26883700  | 0.54249500  | 0.03398300  |
| H | 8.24619200  | 1.22534200  | 0.89208700  |
| H | 8.26466300  | 1.17853100  | -0.85967900 |
| C | 9.56148800  | -0.27810700 | 0.06976700  |
| H | 9.62972000  | -0.94636400 | -0.79459000 |
| H | 10.44520800 | 0.36612800  | 0.06149100  |
| H | 9.61124500  | -0.89833000 | 0.97043400  |

**TS67: H + CH<sub>3</sub>(CH<sub>2</sub>)<sub>14</sub>CH<sub>3</sub> → H<sub>2</sub> + CH<sub>3</sub>CH<sub>2</sub>CH(CH<sub>2</sub>)<sub>12</sub>CH<sub>3</sub>**

|   |              |             |             |
|---|--------------|-------------|-------------|
| C | -9.54997800  | 0.34000400  | -0.15401500 |
| H | -9.57184100  | 0.77981300  | -1.15589400 |
| H | -9.58891200  | 1.15908100  | 0.56956900  |
| H | -10.45794400 | -0.25659900 | -0.03276000 |
| C | -8.29482100  | -0.51464200 | 0.04578100  |
| H | -8.31620600  | -0.98066000 | 1.03855700  |
| H | -8.30181400  | -1.34731700 | -0.67340500 |
| C | -6.99966000  | 0.25516700  | -0.11565900 |
| H | -7.00671800  | 1.14147000  | 0.86046100  |
| H | -6.99397800  | 0.90576700  | -0.99593600 |
| C | -5.71086000  | -0.52162500 | 0.05769700  |
| H | -5.68267200  | -1.32785600 | -0.69199200 |
| H | -5.71797100  | -1.02451800 | 1.03341900  |
| C | -4.44256700  | 0.33080600  | -0.07223800 |
| H | -4.45727400  | 1.11551900  | 0.69350800  |
| H | -4.45338100  | 0.84803000  | -1.04016500 |
| C | -3.14823500  | -0.48033800 | 0.05280100  |
| H | -3.12686100  | -1.25002800 | -0.72979700 |
| H | -3.14941600  | -1.01979500 | 1.00880200  |
| C | -1.87818600  | 0.37275200  | -0.04249300 |
| H | -1.88723900  | 1.12346800  | 0.75815400  |
| H | -1.88930300  | 0.93497400  | -0.98530800 |
| C | -0.58304200  | -0.44290200 | 0.04255600  |
| H | -0.56695600  | -1.17989200 | -0.77090800 |
| H | -0.57986500  | -1.02139800 | 0.97553700  |
| C | 0.68788600   | 0.41158200  | -0.02524100 |
| H | 0.68093200   | 1.13514000  | 0.80020200  |
| H | 0.67610600   | 1.00528400  | -0.94857700 |
| C | 1.98254400   | -0.40737100 | 0.03111900  |
| H | 1.99383500   | -1.12216100 | -0.80198500 |
| H | 1.98938200   | -1.01097700 | 0.94805700  |
| C | 3.25421000   | 0.44716500  | -0.01984800 |
| H | 3.24834100   | 1.15409700  | 0.81993600  |
| H | 3.24248400   | 1.05930800  | -0.93106900 |
| C | 4.54828500   | -0.37369100 | 0.01982200  |
| H | 4.55629400   | -1.07609100 | -0.82377900 |
| H | 4.55748500   | -0.99082300 | 0.92768400  |
| C | 5.82054800   | 0.48044700  | -0.02269800 |
| H | 5.81514200   | 1.17928100  | 0.82388700  |
| H | 5.80919800   | 1.10135000  | -0.92800000 |
| C | 7.11414800   | -0.34110900 | 0.00930200  |
| H | 7.12103900   | -1.03890700 | -0.83833900 |

|   |             |             |             |
|---|-------------|-------------|-------------|
| H | 7.12593400  | -0.96361600 | 0.91366000  |
| C | 8.38745600  | 0.51163700  | -0.03115500 |
| H | 8.38209300  | 1.20773800  | 0.81649000  |
| H | 8.37580100  | 1.13382300  | -0.93445900 |
| C | 9.67397800  | -0.31877300 | -0.00061300 |
| H | 9.72431200  | -1.00130200 | -0.85499300 |
| H | 10.56257500 | 0.31799300  | -0.03198200 |
| H | 9.73185600  | -0.92489100 | 0.90912100  |
| H | -7.01468600 | 1.74003800  | 1.62160300  |

**H-R68:  $\text{H} + \text{CH}_3(\text{CH}_2)_{14}\text{CH}_3 \rightarrow \text{H}_2 + \text{CH}_3(\text{CH}_2)_2\text{CH}(\text{CH}_2)_{11}\text{CH}_3$**

**$\text{CH}_3(\text{CH}_2)_2\text{CH}(\text{CH}_2)_{11}\text{CH}_3$**

|   |             |             |             |
|---|-------------|-------------|-------------|
| C | 9.64562800  | -0.00946700 | 0.37366600  |
| H | 9.64627600  | 0.57805200  | 1.29736300  |
| H | 9.90710100  | 0.66612600  | -0.44711300 |
| H | 10.44091700 | -0.75551700 | 0.45532200  |
| C | 8.28421700  | -0.66812200 | 0.13707900  |
| H | 8.32439900  | -1.27591300 | -0.77462600 |
| H | 8.06146000  | -1.36045300 | 0.95670700  |
| C | 7.13591200  | 0.34329700  | 0.01175000  |
| H | 7.38196100  | 1.05565000  | -0.79819400 |
| H | 7.09146400  | 0.96288200  | 0.92023900  |
| C | 5.80021500  | -0.27267500 | -0.24070000 |
| H | 5.76270400  | -1.25889800 | -0.69778700 |
| C | 4.54009900  | 0.52364400  | -0.16498800 |
| H | 4.49097000  | 1.23103800  | -1.01405900 |
| H | 4.56168400  | 1.16488400  | 0.72872700  |
| C | 3.25950200  | -0.32334600 | -0.15941900 |
| H | 3.28631500  | -1.00611700 | 0.69832900  |
| H | 3.24677400  | -0.95786000 | -1.05467200 |
| C | 1.97392300  | 0.50893100  | -0.10983500 |
| H | 1.95100600  | 1.19182700  | -0.96912200 |
| H | 1.98933300  | 1.14660100  | 0.78368900  |
| C | 0.69625700  | -0.33799000 | -0.10327000 |
| H | 0.71973100  | -1.02073700 | 0.75596100  |
| H | 0.68127300  | -0.97594500 | -0.99652900 |
| C | -0.59214700 | 0.49119500  | -0.05374400 |
| H | -0.61559700 | 1.17446800  | -0.91264300 |
| H | -0.57808300 | 1.12851100  | 0.83999300  |
| C | -1.86860400 | -0.35766000 | -0.04877400 |
| H | -1.84506500 | -1.04069000 | 0.81030500  |
| H | -1.88165600 | -0.99544900 | -0.94220100 |
| C | -3.15838700 | 0.46943500  | -0.00049900 |

|   |              |             |             |
|---|--------------|-------------|-------------|
| H | -3.18151300  | 1.15339800  | -0.85885900 |
| H | -3.14666300  | 1.10608700  | 0.89375300  |
| C | -4.43368800  | -0.38118100 | 0.00176200  |
| H | -4.41027700  | -1.06539200 | 0.85990500  |
| H | -4.44488700  | -1.01771600 | -0.89257600 |
| C | -5.72460700  | 0.44419100  | 0.04983400  |
| H | -5.74760400  | 1.12955100  | -0.80743700 |
| H | -5.71463800  | 1.07937900  | 0.94517600  |
| C | -6.99895400  | -0.40750000 | 0.04936000  |
| H | -6.97611400  | -1.09422200 | 0.90573100  |
| H | -7.01035000  | -1.04184200 | -0.84673400 |
| C | -8.29127600  | 0.41560300  | 0.09956400  |
| H | -8.31467700  | 1.10233800  | -0.75541900 |
| H | -8.28115200  | 1.04778100  | 0.99591700  |
| C | -9.55804900  | -0.44516100 | 0.09693600  |
| H | -9.57908300  | -1.12011600 | 0.95852200  |
| H | -10.46096700 | 0.17069200  | 0.13590500  |
| H | -9.61528000  | -1.06155200 | -0.80590100 |

**TS68:  $\text{H} + \text{CH}_3(\text{CH}_2)_{14}\text{CH}_3 \rightarrow \text{H}_2 + \text{CH}_3(\text{CH}_2)_2\text{CH}(\text{CH}_2)_{11}\text{CH}_3$**

|   |              |             |             |
|---|--------------|-------------|-------------|
| C | -9.58376700  | -0.28241100 | 0.03568300  |
| H | -9.65556100  | -0.69845900 | 1.04552700  |
| H | -9.65855700  | -1.11538100 | -0.67080200 |
| H | -10.45277700 | 0.36282600  | -0.11915500 |
| C | -8.27531000  | 0.49000800  | -0.15226500 |
| H | -8.24871300  | 0.92679100  | -1.15781500 |
| H | -8.24282500  | 1.33233100  | 0.54786200  |
| C | -7.02840100  | -0.37954000 | 0.04948000  |
| H | -7.05568800  | -1.21935900 | -0.66248100 |
| H | -7.05679500  | -0.83697000 | 1.04721900  |
| C | -5.72026000  | 0.36486600  | -0.12274200 |
| H | -5.70305000  | 1.25404200  | 0.85010700  |
| H | -5.70645000  | 1.01217300  | -1.00523800 |
| C | -4.44549900  | -0.43612600 | 0.04583600  |
| H | -4.43519400  | -1.24220300 | -0.70445900 |
| H | -4.45882200  | -0.93953100 | 1.02119200  |
| C | -3.16180000  | 0.39226100  | -0.08757200 |
| H | -3.15899200  | 1.17600800  | 0.67930000  |
| H | -3.16594800  | 0.91101600  | -1.05473600 |
| C | -1.88257900  | -0.44335300 | 0.03228900  |
| H | -1.87626000  | -1.20978900 | -0.75374300 |
| H | -1.89284200  | -0.98695600 | 0.98589000  |
| C | -0.59716800  | 0.38668800  | -0.06010500 |

|   |             |             |             |
|---|-------------|-------------|-------------|
| H | -0.59273900 | 1.13452700  | 0.74328000  |
| H | -0.59787200 | 0.95248200  | -1.00084400 |
| C | 0.68312300  | -0.45236800 | 0.02252000  |
| H | 0.68764600  | -1.18522500 | -0.79480100 |
| H | 0.67446000  | -1.03569700 | 0.95245600  |
| C | 1.96884500  | 0.38021000  | -0.03831100 |
| H | 1.97174200  | 1.10052000  | 0.79000100  |
| H | 1.97004100  | 0.97772200  | -0.95925500 |
| C | 3.24931000  | -0.46070500 | 0.01893900  |
| H | 3.25197000  | -1.17176000 | -0.81741900 |
| H | 3.24260300  | -1.06848000 | 0.93312100  |
| C | 4.53497400  | 0.37312400  | -0.02303900 |
| H | 4.53626000  | 1.07734300  | 0.81903700  |
| H | 4.53764900  | 0.98835700  | -0.93223200 |
| C | 5.81568900  | -0.46826000 | 0.02058500  |
| H | 5.81722500  | -1.16803300 | -0.82526300 |
| H | 5.81046500  | -1.08826500 | 0.92655500  |
| C | 7.10109500  | 0.36600500  | -0.01232000 |
| H | 7.10174400  | 1.06374000  | 0.83537600  |
| H | 7.10610900  | 0.98867900  | -0.91662400 |
| C | 8.38276000  | -0.47419900 | 0.02706900  |
| H | 8.38383300  | -1.16982700 | -0.82099800 |
| H | 8.37763900  | -1.09700300 | 0.93000600  |
| C | 9.66100300  | 0.36888700  | -0.00358700 |
| H | 9.70511700  | 1.05113000  | 0.85134800  |
| H | 10.55587100 | -0.25908900 | 0.02665800  |
| H | 9.71227300  | 0.97634200  | -0.91282700 |
| H | -5.69564900 | 1.85547700  | 1.60899100  |

**H-R69:  $\text{H} + \text{CH}_3(\text{CH}_2)_{14}\text{CH}_3 \rightarrow \text{H}_2 + \text{CH}_3(\text{CH}_2)_3\text{CH}(\text{CH}_2)_{10}\text{CH}_3$**   
 **$\text{CH}_3(\text{CH}_2)_3\text{CH}(\text{CH}_2)_{10}\text{CH}_3$**

|   |              |             |             |
|---|--------------|-------------|-------------|
| C | -9.49889100  | 0.83019800  | 0.37143800  |
| H | -9.65122300  | 1.18721700  | -0.65210900 |
| H | -9.30807900  | 1.70525800  | 1.00076500  |
| H | -10.43603100 | 0.37788400  | 0.70781100  |
| C | -8.33857600  | -0.16667000 | 0.44310600  |
| H | -8.23288100  | -0.52927700 | 1.47297400  |
| H | -8.57619400  | -1.04779800 | -0.16565100 |
| C | -7.00355700  | 0.42381600  | -0.02241200 |
| H | -6.76318700  | 1.30477300  | 0.58532600  |
| H | -7.10672700  | 0.78363300  | -1.05410900 |
| C | -5.83431500  | -0.56809700 | 0.04886800  |
| H | -6.09246300  | -1.46143300 | -0.55056300 |



|   |             |             |             |
|---|-------------|-------------|-------------|
| H | -5.73383700 | -0.94511900 | 1.07764900  |
| C | -4.52717400 | -0.00973600 | -0.40694300 |
| H | -4.53523900 | 0.82206100  | -1.10781100 |
| C | -3.24063300 | -0.73191300 | -0.18049700 |
| H | -3.16243800 | -1.59004800 | -0.87438200 |
| H | -3.24359500 | -1.18335500 | 0.82219300  |
| C | -1.98966500 | 0.14388200  | -0.34571300 |
| H | -2.04355300 | 0.97907000  | 0.36294300  |
| H | -1.99587000 | 0.59230200  | -1.34725900 |
| C | -0.67684300 | -0.61849200 | -0.13839200 |
| H | -0.61783200 | -1.44322500 | -0.86060900 |
| H | -0.68313900 | -1.08567000 | 0.85510200  |
| C | 0.57089100  | 0.26199100  | -0.27148900 |
| H | 0.50988900  | 1.08451300  | 0.45293000  |
| H | 0.57866400  | 0.73218100  | -1.26343100 |
| C | 1.88559600  | -0.49789100 | -0.06182200 |
| H | 1.95650500  | -1.30956200 | -0.79751700 |
| H | 1.86932000  | -0.98244900 | 0.92313100  |
| C | 3.13127500  | 0.38958000  | -0.16557700 |
| H | 3.05887400  | 1.19938000  | 0.57205700  |
| H | 3.14814000  | 0.87676400  | -1.14919200 |
| C | 4.44677200  | -0.36853800 | 0.04544200  |
| H | 4.52652500  | -1.17039800 | -0.70002400 |
| H | 4.42405400  | -0.86586200 | 1.02387000  |
| C | 5.69035000  | 0.52415300  | -0.03721900 |
| H | 5.60901500  | 1.32552200  | 0.70866800  |
| H | 5.71402300  | 1.02220000  | -1.01526900 |
| C | 7.00645300  | -0.23179600 | 0.17631900  |
| H | 7.09262000  | -1.02963500 | -0.57299600 |
| H | 6.98118400  | -0.73460300 | 1.15205700  |
| C | 8.24923100  | 0.66294300  | 0.10383800  |
| H | 8.16259000  | 1.46033900  | 0.85201500  |
| H | 8.27613900  | 1.16406200  | -0.87153400 |
| C | 9.55926500  | -0.09997400 | 0.32105800  |
| H | 9.69009400  | -0.88378900 | -0.43188900 |
| H | 10.42500500 | 0.56554500  | 0.26073600  |
| H | 9.57856000  | -0.58122900 | 1.30409900  |

**TS69:  $\text{H} + \text{CH}_3(\text{CH}_2)_{14}\text{CH}_3 \rightarrow \text{H}_2 + \text{CH}_3(\text{CH}_2)_3\text{CH}(\text{CH}_2)_{10}\text{CH}_3$**

|   |              |             |             |
|---|--------------|-------------|-------------|
| C | -9.56859800  | 0.40476800  | -0.08933700 |
| H | -9.60636500  | 0.87882300  | -1.07531200 |
| H | -9.59557400  | 1.20138300  | 0.66081800  |
| H | -10.47797000 | -0.19134700 | 0.02699900  |

|   |             |             |             |
|---|-------------|-------------|-------------|
| C | -8.31164700 | -0.45665300 | 0.06279200  |
| H | -8.32092600 | -0.94545600 | 1.04458200  |
| H | -8.33127800 | -1.26466700 | -0.67895600 |
| C | -7.01095000 | 0.33928200  | -0.09030800 |
| H | -6.98617300 | 1.14063900  | 0.65810200  |
| H | -7.00335200 | 0.83537200  | -1.06946300 |
| C | -5.74851100 | -0.51980400 | 0.04873100  |
| H | -5.76643500 | -1.31446300 | -0.71331200 |
| H | -5.75979800 | -1.03763300 | 1.01670500  |
| C | -4.45487900 | 0.25709300  | -0.08721300 |
| H | -4.44776600 | 1.08924100  | 0.93483900  |
| H | -4.45776200 | 0.95341100  | -0.93160500 |
| C | -3.16428800 | -0.52754400 | 0.03117000  |
| H | -3.14408600 | -1.29415000 | -0.75910100 |
| H | -3.16055600 | -1.07972000 | 0.97989700  |
| C | -1.89804100 | 0.33200500  | -0.06863100 |
| H | -1.91183300 | 1.08512800  | 0.72816800  |
| H | -1.91323700 | 0.88778800  | -1.01490300 |
| C | -0.60122800 | -0.47997900 | 0.02047300  |
| H | -0.58311000 | -1.22373300 | -0.78685000 |
| H | -0.59487600 | -1.05009200 | 0.95849900  |
| C | 0.66569600  | 0.37967200  | -0.05537300 |
| H | 0.65240500  | 1.11386700  | 0.76040400  |
| H | 0.65352600  | 0.96101600  | -0.98651000 |
| C | 1.96443300  | -0.43156900 | 0.01594000  |
| H | 1.98240900  | -1.15806900 | -0.80685600 |
| H | 1.97200900  | -1.02176700 | 0.94153600  |
| C | 3.23090900  | 0.43011800  | -0.04335700 |
| H | 3.21611800  | 1.15092100  | 0.78440500  |
| H | 3.21964300  | 1.02683300  | -0.96475300 |
| C | 4.53035800  | -0.38092000 | 0.01666000  |
| H | 4.54772700  | -1.09764900 | -0.81465300 |
| H | 4.53940200  | -0.98212300 | 0.93514300  |
| C | 5.79642500  | 0.48195100  | -0.03424900 |
| H | 5.78038300  | 1.19636600  | 0.79907800  |
| H | 5.78583300  | 1.08576600  | -0.95104700 |
| C | 7.09624000  | -0.32845300 | 0.02105200  |
| H | 7.11389700  | -1.04231000 | -0.81294600 |
| H | 7.10762500  | -0.93328400 | 0.93732900  |
| C | 8.36273800  | 0.53393400  | -0.02836700 |
| H | 8.34588100  | 1.24695100  | 0.80492800  |
| H | 8.35196600  | 1.13757100  | -0.94418300 |
| C | 9.65596200  | -0.28463000 | 0.02760000  |

|   |             |             |             |
|---|-------------|-------------|-------------|
| H | 9.71778100  | -0.98430400 | -0.81203800 |
| H | 10.53931000 | 0.35898500  | -0.01132100 |
| H | 9.71304700  | -0.87119200 | 0.95011600  |
| H | -4.44559800 | 1.64627200  | 1.72675500  |

**H-R70:  $\text{H} + \text{CH}_3(\text{CH}_2)_{14}\text{CH}_3 \rightarrow \text{H}_2 + \text{CH}_3(\text{CH}_2)_4\text{CH}(\text{CH}_2)_9\text{CH}_3$**   
 **$\text{CH}_3(\text{CH}_2)_4\text{CH}(\text{CH}_2)_9\text{CH}_3$**

|   |             |             |             |
|---|-------------|-------------|-------------|
| C | 9.57033600  | -0.25874800 | 0.56016100  |
| H | 9.53623300  | -0.01074100 | 1.62583100  |
| H | 9.83634100  | 0.65413300  | 0.01772700  |
| H | 10.37969800 | -0.97943000 | 0.41333100  |
| C | 8.22815700  | -0.81757800 | 0.07886800  |
| H | 8.30540400  | -1.09129600 | -0.98051300 |
| H | 8.00600900  | -1.74725800 | 0.61681700  |
| C | 7.06245300  | 0.16091100  | 0.26218600  |
| H | 7.28374600  | 1.09031700  | -0.27897600 |
| H | 6.98859100  | 0.43792600  | 1.32211600  |
| C | 5.71533900  | -0.39406000 | -0.21117000 |
| H | 5.49044400  | -1.31963200 | 0.33251800  |
| H | 5.78890100  | -0.67192400 | -1.27022000 |
| C | 4.54798400  | 0.58648100  | -0.03152000 |
| H | 4.78631600  | 1.52289800  | -0.56995300 |
| H | 4.47779200  | 0.88572700  | 1.02514400  |
| C | 3.22918700  | 0.05745200  | -0.48890100 |
| H | 3.21902400  | -0.73909600 | -1.22953800 |
| C | 1.94984100  | 0.76952100  | -0.19877400 |
| H | 1.85650200  | 1.65805800  | -0.85122200 |
| H | 1.97709500  | 1.17505100  | 0.82294000  |
| C | 0.69456800  | -0.09815800 | -0.37427500 |
| H | 0.76126600  | -0.96137700 | 0.29877100  |
| H | 0.68077100  | -0.50568500 | -1.39308500 |
| C | -0.61360700 | 0.65500400  | -0.11113200 |
| H | -0.68621900 | 1.50773200  | -0.79872800 |
| H | -0.58814900 | 1.08218800  | 0.89990200  |
| C | -1.86333900 | -0.22088800 | -0.25547200 |
| H | -1.78973800 | -1.06986400 | 0.43649900  |
| H | -1.88787800 | -0.65369000 | -1.26403200 |
| C | -3.17492100 | 0.52882300  | 0.00446200  |
| H | -3.25947700 | 1.36633000  | -0.70013200 |
| H | -3.14221200 | 0.97746400  | 1.00588500  |
| C | -4.42084400 | -0.35706700 | -0.10986900 |
| H | -4.33606600 | -1.19094600 | 0.59901000  |
| H | -4.45199800 | -0.81107000 | -1.10889100 |

|   |              |             |             |
|---|--------------|-------------|-------------|
| C | -5.73428500  | 0.39078900  | 0.14600100  |
| H | -5.82727400  | 1.21567300  | -0.57231900 |
| H | -5.69715700  | 0.85681200  | 1.13931900  |
| C | -6.97716700  | -0.50170100 | 0.05456200  |
| H | -6.88555600  | -1.32410000 | 0.77612900  |
| H | -7.01404500  | -0.97192200 | -0.93693000 |
| C | -8.29230500  | 0.24455500  | 0.30652500  |
| H | -8.38840000  | 1.06109900  | -0.41951000 |
| H | -8.25330800  | 0.72011500  | 1.29421700  |
| C | -9.52657100  | -0.65860700 | 0.22474500  |
| H | -9.47706200  | -1.46319700 | 0.96529300  |
| H | -10.44694400 | -0.09656100 | 0.40663000  |
| H | -9.61160500  | -1.12410500 | -0.76240400 |

**TS70: H + CH<sub>3</sub>(CH<sub>2</sub>)<sub>14</sub>CH<sub>3</sub> → H<sub>2</sub> + CH<sub>3</sub>(CH<sub>2</sub>)<sub>4</sub>CH(CH<sub>2</sub>)<sub>9</sub>CH<sub>3</sub>**

|   |              |             |             |
|---|--------------|-------------|-------------|
| C | -9.60127700  | -0.22813500 | 0.08520000  |
| H | -9.65861800  | -0.67259900 | 1.08390700  |
| H | -9.69013400  | -1.04089400 | -0.64281800 |
| H | -10.47066900 | 0.42370300  | -0.03788400 |
| C | -8.29181800  | 0.54339100  | -0.10240100 |
| H | -8.28172900  | 1.01013700  | -1.09497400 |
| H | -8.24668400  | 1.36695900  | 0.62049900  |
| C | -7.04381500  | -0.33285300 | 0.05445700  |
| H | -7.08382100  | -1.15105100 | -0.67679700 |
| H | -7.06012700  | -0.80918800 | 1.04343300  |
| C | -5.72924700  | 0.43629100  | -0.11371500 |
| H | -5.68347500  | 1.24340500  | 0.62727500  |
| H | -5.71638700  | 0.92311000  | -1.09732400 |
| C | -4.48271800  | -0.44603100 | 0.02619900  |
| H | -4.51595200  | -1.24215100 | -0.73370500 |
| H | -4.50238100  | -0.96102700 | 0.99552200  |
| C | -3.17565900  | 0.30759700  | -0.11236400 |
| H | -3.15256000  | 1.13933200  | 0.90960200  |
| H | -3.16770000  | 1.00394300  | -0.95671800 |
| C | -1.89856000  | -0.49908600 | 0.00428300  |
| H | -1.88991700  | -1.26238600 | -0.78938600 |
| H | -1.90538800  | -1.05536100 | 0.95058500  |
| C | -0.61829200  | 0.34013500  | -0.08961600 |
| H | -0.62185700  | 1.09021800  | 0.71014600  |
| H | -0.62239600  | 0.89988600  | -1.03366000 |
| C | 0.66539000   | -0.49247500 | -0.00054300 |
| H | 0.67537600   | -1.23154900 | -0.81227900 |
| H | 0.65927400   | -1.06817700 | 0.93406600  |

|   |             |             |             |
|---|-------------|-------------|-------------|
| C | 1.94534700  | 0.34852100  | -0.06594100 |
| H | 1.93880300  | 1.07861800  | 0.75359200  |
| H | 1.94629900  | 0.93484200  | -0.99402800 |
| C | 3.23188300  | -0.48173200 | 0.00764900  |
| H | 3.24429700  | -1.20350300 | -0.81939000 |
| H | 3.22587100  | -1.07741200 | 0.92973700  |
| C | 4.51051300  | 0.36260500  | -0.03921200 |
| H | 4.50016100  | 1.07943500  | 0.79205300  |
| H | 4.51340600  | 0.96401000  | -0.95760300 |
| C | 5.79855100  | -0.46613200 | 0.02531300  |
| H | 5.81196800  | -1.17902300 | -0.80939700 |
| H | 5.79348900  | -1.07176200 | 0.94094800  |
| C | 7.07606400  | 0.37997300  | -0.01286000 |
| H | 7.06382700  | 1.09191600  | 0.82283400  |
| H | 7.08144900  | 0.98725900  | -0.92756600 |
| C | 8.36565000  | -0.44655000 | 0.04993200  |
| H | 8.37970900  | -1.15678900 | -0.78581700 |
| H | 8.36035200  | -1.05351500 | 0.96359200  |
| C | 9.63556700  | 0.40880200  | 0.01335800  |
| H | 9.66638400  | 1.10676600  | 0.85608900  |
| H | 10.53644500 | -0.20937400 | 0.06155000  |
| H | 9.68757000  | 1.00023300  | -0.90634300 |
| H | -3.14034900 | 1.69605200  | 1.70182400  |

**H-R71:  $\text{H} + \text{CH}_3(\text{CH}_2)_{14}\text{CH}_3 \rightarrow \text{H}_2 + \text{CH}_3(\text{CH}_2)_5\text{CH}(\text{CH}_2)_8\text{CH}_3$**   
 **$\text{CH}_3(\text{CH}_2)_5\text{CH}(\text{CH}_2)_8\text{CH}_3$**

|   |              |             |             |
|---|--------------|-------------|-------------|
| C | -9.52115300  | 0.79045100  | 0.28233500  |
| H | -9.61612500  | 1.23211600  | -0.71481100 |
| H | -9.40781300  | 1.61185300  | 0.99699900  |
| H | -10.46125500 | 0.28007000  | 0.50977700  |
| C | -8.33032900  | -0.17023100 | 0.35114100  |
| H | -8.28500100  | -0.62415400 | 1.34867700  |
| H | -8.48725500  | -0.99745900 | -0.35177300 |
| C | -6.98868700  | 0.50464800  | 0.04348100  |
| H | -6.83287800  | 1.33353100  | 0.74626400  |
| H | -7.03469300  | 0.95895800  | -0.95502400 |
| C | -5.78971800  | -0.44783300 | 0.11099000  |
| H | -5.94714200  | -1.27779200 | -0.59013300 |
| H | -5.74365400  | -0.89981600 | 1.11046300  |
| C | -4.45075600  | 0.22939900  | -0.19960500 |
| H | -4.29121700  | 1.06120700  | 0.49689000  |
| H | -4.49277300  | 0.67383800  | -1.20207300 |
| C | -3.24906800  | -0.72353400 | -0.12498700 |

|   |             |             |             |
|---|-------------|-------------|-------------|
| H | -3.43587800 | -1.57888000 | -0.80135600 |
| H | -3.19482300 | -1.17041200 | 0.87875500  |
| C | -1.94103100 | -0.08767700 | -0.46060600 |
| H | -1.94073600 | 0.77532700  | -1.12264400 |
| C | -0.64155800 | -0.76589700 | -0.17885100 |
| H | -0.51321600 | -1.63028700 | -0.85721800 |
| H | -0.66645800 | -1.20586300 | 0.82914100  |
| C | 0.58679500  | 0.14571500  | -0.31226000 |
| H | 0.48514300  | 0.98692700  | 0.38383800  |
| H | 0.60014000  | 0.58195300  | -1.31912900 |
| C | 1.91458800  | -0.57411900 | -0.05416200 |
| H | 2.01304900  | -1.41472800 | -0.75332500 |
| H | 1.89758300  | -1.01602200 | 0.95070000  |
| C | 3.14064700  | 0.33696800  | -0.18351000 |
| H | 3.04226000  | 1.17670800  | 0.51649800  |
| H | 3.15703500  | 0.78004600  | -1.18779000 |
| C | 4.47048000  | -0.38116000 | 0.07290800  |
| H | 4.56906600  | -1.22086400 | -0.62721400 |
| H | 4.45424600  | -0.82430100 | 1.07716100  |
| C | 5.69607300  | 0.53067800  | -0.05658600 |
| H | 5.59724400  | 1.37051100  | 0.64337200  |
| H | 5.71220300  | 0.97371000  | -1.06092800 |
| C | 7.02632300  | -0.18623400 | 0.19981200  |
| H | 7.12601500  | -1.02657900 | -0.49965000 |
| H | 7.01171000  | -0.62880400 | 1.20453000  |
| C | 8.25236200  | 0.72492900  | 0.06940900  |
| H | 8.15279700  | 1.56495600  | 0.76761100  |
| H | 8.26836000  | 1.16570800  | -0.93492700 |
| C | 9.57642200  | 0.00018800  | 0.32863400  |
| H | 9.71838900  | -0.82683700 | -0.37434900 |
| H | 10.43005500 | 0.67560400  | 0.22297400  |
| H | 9.60728100  | -0.41796800 | 1.33983700  |

**TS71:  $\text{H} + \text{CH}_3(\text{CH}_2)_{14}\text{CH}_3 \rightarrow \text{H}_2 + \text{CH}_3(\text{CH}_2)_5\text{CH}(\text{CH}_2)_8\text{CH}_3$**

|   |              |             |             |
|---|--------------|-------------|-------------|
| C | -9.58460200  | 0.46274000  | 0.02046300  |
| H | -9.63648600  | 1.01277200  | -0.92457800 |
| H | -9.59168100  | 1.19851000  | 0.83087600  |
| H | -10.49647400 | -0.13474400 | 0.10693500  |
| C | -8.33115600  | -0.41520200 | 0.08168200  |
| H | -8.32629100  | -0.97943800 | 1.02229900  |
| H | -8.36953500  | -1.16261200 | -0.72023700 |
| C | -7.02702300  | 0.38217800  | -0.03359600 |
| H | -6.99092300  | 1.13121200  | 0.76811900  |

|   |             |             |             |
|---|-------------|-------------|-------------|
| H | -7.03154500 | 0.94661800  | -0.97531700 |
| C | -5.76554500 | -0.48612800 | 0.03015300  |
| H | -5.79971200 | -1.23392600 | -0.77292300 |
| H | -5.76333600 | -1.05114900 | 0.97128100  |
| C | -4.46480100 | 0.31695600  | -0.07926700 |
| H | -4.43146800 | 1.06526000  | 0.72151500  |
| H | -4.46315000 | 0.87826700  | -1.02239200 |
| C | -3.20208800 | -0.55062300 | -0.00789100 |
| H | -3.23112600 | -1.29944900 | -0.81465000 |
| H | -3.20113000 | -1.12352600 | 0.92852100  |
| C | -1.91012200 | 0.23322600  | -0.11661700 |
| H | -1.90282600 | 1.02753200  | 0.93480000  |
| H | -1.91605200 | 0.95935300  | -0.93550300 |
| C | -0.61613300 | -0.54962800 | -0.02526300 |
| H | -0.59960100 | -1.30258500 | -0.82849900 |
| H | -0.60171700 | -1.11769600 | 0.91399900  |
| C | 0.64446100  | 0.31857900  | -0.12127800 |
| H | 0.61915700  | 1.07598800  | 0.67122500  |
| H | 0.63091300  | 0.86908200  | -1.07067100 |
| C | 1.94805900  | -0.48057000 | -0.01715500 |
| H | 1.97375000  | -1.24026100 | -0.80927200 |
| H | 1.95913000  | -1.03129300 | 0.93232900  |
| C | 3.20616100  | 0.39034400  | -0.10997000 |
| H | 3.17200800  | 1.15679100  | 0.67501800  |
| H | 3.20035300  | 0.93344800  | -1.06397600 |
| C | 4.51402000  | -0.39946200 | 0.01411900  |
| H | 4.54994900  | -1.16762000 | -0.76929600 |
| H | 4.52005800  | -0.94017900 | 0.96945600  |
| C | 5.76920400  | 0.47584300  | -0.07841600 |
| H | 5.72587000  | 1.25137900  | 0.69732700  |
| H | 5.76877100  | 1.00784300  | -1.03871500 |
| C | 7.07913800  | -0.30683000 | 0.06486500  |
| H | 7.12368000  | -1.08554300 | -0.70787500 |
| H | 7.08192900  | -0.83503400 | 1.02739800  |
| C | 8.33317000  | 0.56975700  | -0.03160200 |
| H | 8.28493500  | 1.35267500  | 0.73508600  |
| H | 8.33507400  | 1.09053200  | -0.99699400 |
| C | 9.63737400  | -0.21736600 | 0.12587400  |
| H | 9.72980200  | -0.98909700 | -0.64507400 |
| H | 10.51109000 | 0.43572900  | 0.04756300  |
| H | 9.68270700  | -0.71688500 | 1.09889400  |
| H | -1.89683600 | 1.55516800  | 1.74673800  |

**H-R72:  $\text{H} + \text{CH}_3(\text{CH}_2)_{14}\text{CH}_3 \rightarrow \text{H}_2 + \text{CH}_3(\text{CH}_2)_6\text{CH}(\text{CH}_2)_7\text{CH}_3$**   
 **$\text{CH}_3(\text{CH}_2)_6\text{CH}(\text{CH}_2)_7\text{CH}_3$**

|   |             |             |             |
|---|-------------|-------------|-------------|
| C | 9.58515100  | -0.12337600 | 0.38909600  |
| H | 9.61056700  | 0.29399000  | 1.40077200  |
| H | 9.77373200  | 0.69697900  | -0.31069400 |
| H | 10.41430300 | -0.83112500 | 0.30158000  |
| C | 8.24022900  | -0.79728900 | 0.10169100  |
| H | 8.26029900  | -1.23746100 | -0.90284700 |
| H | 8.09500400  | -1.63361200 | 0.79632100  |
| C | 7.04682800  | 0.15912500  | 0.20851100  |
| H | 7.19316100  | 0.99676400  | -0.48594200 |
| H | 7.02693200  | 0.59940700  | 1.21414200  |
| C | 5.69664200  | -0.50682500 | -0.07921300 |
| H | 5.55157100  | -1.34455900 | 0.61506600  |
| H | 5.71816500  | -0.94686500 | -1.08476600 |
| C | 4.50304000  | 0.44927400  | 0.02723600  |
| H | 4.64927100  | 1.28901000  | -0.66454000 |
| H | 4.47906900  | 0.88636900  | 1.03404600  |
| C | 3.15581700  | -0.21904300 | -0.26625600 |
| H | 3.00712400  | -1.06017200 | 0.42138600  |
| H | 3.17675000  | -0.64939500 | -1.27552600 |
| C | 1.95848000  | 0.73584200  | -0.15530100 |
| H | 2.13520200  | 1.60069100  | -0.82218900 |
| H | 1.92353200  | 1.16781000  | 0.85582100  |
| C | 0.64331600  | 0.10741100  | -0.47681400 |
| H | 0.63005200  | -0.74720100 | -1.14954300 |
| C | -0.65024600 | 0.78411200  | -0.16574200 |
| H | -0.79025500 | 1.65425100  | -0.83439300 |
| H | -0.60724400 | 1.21529800  | 0.84538200  |
| C | -1.88093700 | -0.12633600 | -0.28553700 |
| H | -1.76888900 | -0.97159400 | 0.40399600  |
| H | -1.90960100 | -0.55674900 | -1.29459400 |
| C | -3.20484700 | 0.59170300  | -0.00351800 |
| H | -3.31435600 | 1.43562800  | -0.69698900 |
| H | -3.17290000 | 1.02857600  | 1.00317200  |
| C | -4.43191500 | -0.31992500 | -0.11906200 |
| H | -4.32321900 | -1.16192200 | 0.57665600  |
| H | -4.46161100 | -0.75962100 | -1.12451800 |
| C | -5.75902000 | 0.39576700  | 0.15767700  |
| H | -5.86815700 | 1.23747100  | -0.53848200 |
| H | -5.72985300 | 0.83573500  | 1.16306000  |
| C | -6.98481100 | -0.51729700 | 0.04178700  |
| H | -6.87669400 | -1.35902300 | 0.73827800  |



|   |              |             |             |
|---|--------------|-------------|-------------|
| H | -7.01420400  | -0.95810700 | -0.96339000 |
| C | -8.31353700  | 0.19605600  | 0.31690300  |
| H | -8.42210500  | 1.03679500  | -0.37908800 |
| H | -8.28545200  | 0.63556800  | 1.32150500  |
| C | -9.53137200  | -0.72512400 | 0.19796000  |
| H | -9.46726800  | -1.55811900 | 0.90525200  |
| H | -10.46171200 | -0.18759200 | 0.40187400  |
| H | -9.60811400  | -1.15167300 | -0.80731100 |

**TS72:  $\text{H} + \text{CH}_3(\text{CH}_2)_{14}\text{CH}_3 \rightarrow \text{H}_2 + \text{CH}_3(\text{CH}_2)_6\text{CH}(\text{CH}_2)_7\text{CH}_3$**

|   |             |             |             |
|---|-------------|-------------|-------------|
| C | 9.61879800  | -0.21032200 | 0.11547200  |
| H | 9.71184600  | -1.00817100 | -0.62834500 |
| H | 9.66826400  | -0.67540800 | 1.10520000  |
| H | 10.49006900 | 0.44251500  | 0.01211100  |
| C | 8.31160300  | 0.56659400  | -0.06585900 |
| H | 8.26224700  | 1.37512200  | 0.67368800  |
| H | 8.30964000  | 1.05404800  | -1.04849100 |
| C | 7.06099100  | -0.31061700 | 0.06324700  |
| H | 7.06886700  | -0.80740600 | 1.04230800  |
| H | 7.10573400  | -1.11375500 | -0.68411200 |
| C | 5.74785700  | 0.46258700  | -0.10027100 |
| H | 5.74384200  | 0.96728400  | -1.07517300 |
| H | 5.70195900  | 1.25925600  | 0.65346200  |
| C | 4.49692200  | -0.41553800 | 0.01837700  |
| H | 4.50962700  | -0.93385200 | 0.98589000  |
| H | 4.53246700  | -1.20134300 | -0.74747700 |
| C | 3.18620900  | 0.36709100  | -0.11648300 |
| H | 3.17476300  | 0.89380900  | -1.07930900 |
| H | 3.14619500  | 1.14347900  | 0.65686300  |
| C | 1.93435100  | -0.51243300 | -0.00997800 |
| H | 1.95154400  | -1.06503700 | 0.93844800  |
| H | 1.96154100  | -1.27822900 | -0.80065000 |
| C | 0.63248900  | 0.25515100  | -0.11754000 |
| H | 0.62554100  | 0.97693600  | -0.94024700 |
| H | 0.62181500  | 1.05495100  | 0.92963200  |
| C | -0.65115200 | -0.54331900 | -0.01694300 |
| H | -0.64723800 | -1.12103200 | 0.91647100  |
| H | -0.66863100 | -1.28819500 | -0.82773000 |
| C | -1.92351700 | 0.31003700  | -0.08858300 |
| H | -1.92032800 | 0.88383400  | -1.02416800 |
| H | -1.90630700 | 1.04799700  | 0.72221200  |
| C | -3.21540600 | -0.50998900 | -0.00199900 |
| H | -3.21196600 | -1.09334700 | 0.92785500  |

|   |              |             |             |
|---|--------------|-------------|-------------|
| H | -3.23626600  | -1.24220200 | -0.81972100 |
| C | -4.48637000  | 0.34536100  | -0.05597500 |
| H | -4.48763000  | 0.93342700  | -0.98294600 |
| H | -4.46544700  | 1.07379500  | 0.76479300  |
| C | -5.78174100  | -0.47021600 | 0.02614800  |
| H | -5.77809400  | -1.06266600 | 0.95034600  |
| H | -5.80620500  | -1.19469200 | -0.79828000 |
| C | -7.05093800  | 0.38804800  | -0.01788800 |
| H | -7.05531200  | 0.98165000  | -0.94153000 |
| H | -7.02678300  | 1.11216600  | 0.80697900  |
| C | -8.34842300  | -0.42422700 | 0.06441200  |
| H | -8.34396400  | -1.01765600 | 0.98691700  |
| H | -8.37475500  | -1.14651900 | -0.76065300 |
| C | -9.60967900  | 0.44361400  | 0.02253400  |
| H | -9.66111000  | 1.02192900  | -0.90549900 |
| H | -10.51652500 | -0.16444600 | 0.08510700  |
| H | -9.62829900  | 1.15416200  | 0.85502300  |
| H | 0.61693300   | 1.58666600  | 1.73899900  |

## 2.2 Hydrogen abstraction reaction of $n$ -C<sub>n</sub>H<sub>2n+2</sub> (n = 1-16) by HO<sub>2</sub> radical

### 2.2.1 C1 (CH<sub>4</sub>)

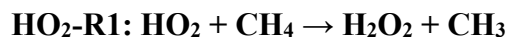

**HO<sub>2</sub>**

|   |             |             |            |
|---|-------------|-------------|------------|
| O | 0.05528300  | 0.71892300  | 0.00000000 |
| O | 0.05528300  | -0.60935400 | 0.00000000 |
| H | -0.88453600 | -0.87655400 | 0.00000000 |

**H<sub>2</sub>O<sub>2</sub>**

|   |             |             |             |
|---|-------------|-------------|-------------|
| O | 0.71704600  | 0.11962300  | -0.05193700 |
| H | 1.02700100  | -0.66834300 | 0.41527900  |
| O | -0.71712100 | -0.11966100 | -0.05186800 |
| H | -1.02640600 | 0.66865000  | 0.41516300  |

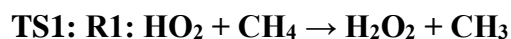

|   |             |             |             |
|---|-------------|-------------|-------------|
| C | -2.88344700 | 0.65332700  | -0.08987500 |
| H | -2.85876200 | -0.34755400 | 0.33008700  |
| H | -2.51556000 | 1.44594600  | 0.55514500  |
| H | -2.60730100 | 0.73043500  | -1.13734600 |
| H | -4.26643500 | 0.97018900  | -0.12740200 |
| O | -5.37311300 | 1.18560400  | -0.15080800 |
| O | -5.67089200 | 1.73592000  | 1.12046800  |
| H | -6.09269300 | 0.99186800  | 1.57527100  |

### 2.2.2 C2 (C<sub>2</sub>H<sub>6</sub>)

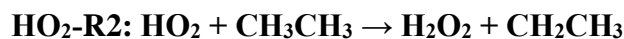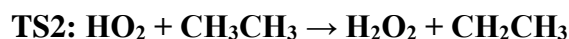

|   |             |             |             |
|---|-------------|-------------|-------------|
| C | -2.87442600 | 1.61357800  | -0.36349700 |
| H | -2.61465600 | 2.41482500  | 0.32814300  |
| H | -2.38626700 | 1.71329900  | -1.33269000 |
| H | -4.16962900 | 1.94657800  | -0.69675300 |
| C | -2.94859200 | 0.22913000  | 0.21556600  |
| H | -3.29174200 | -0.49929900 | -0.52262000 |
| H | -1.95728900 | -0.09613200 | 0.56292200  |
| H | -3.62214300 | 0.18797800  | 1.07544500  |
| O | -5.27330500 | 2.20320600  | -0.95172500 |
| O | -6.00721300 | 1.88298200  | 0.21720100  |
| H | -6.14849700 | 2.75233500  | 0.62049100  |

### 2.2.3 C3 (C<sub>3</sub>H<sub>8</sub>)

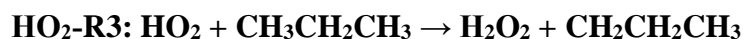

**TS3: HO<sub>2</sub> + CH<sub>3</sub>CH<sub>2</sub>CH<sub>3</sub> → H<sub>2</sub>O<sub>2</sub> + CH<sub>2</sub>CH<sub>2</sub>CH<sub>3</sub>**

|   |             |             |             |
|---|-------------|-------------|-------------|
| C | 0.53663500  | 1.24751900  | -0.09684400 |
| H | 0.89144800  | 1.58233900  | -1.07276500 |
| H | -0.63814300 | 0.61813200  | -0.45091000 |
| H | 0.16479300  | 2.06204200  | 0.52491700  |
| C | 1.36643300  | 0.20121500  | 0.59693500  |
| H | 0.80258000  | -0.21087300 | 1.44160600  |
| H | 2.24191200  | 0.69979800  | 1.04408100  |
| C | 1.83603900  | -0.93031000 | -0.32227500 |
| H | 2.45003300  | -1.65017100 | 0.22462200  |
| H | 0.98338500  | -1.46661800 | -0.74573100 |
| H | 2.43494800  | -0.54104300 | -1.15140000 |
| O | -1.62704000 | 0.06280700  | -0.70795200 |
| O | -2.00712200 | -0.58834200 | 0.49247000  |
| H | -2.69230000 | 0.00013000  | 0.84253700  |

**HO<sub>2</sub>-R4: HO<sub>2</sub> + CH<sub>3</sub>CH<sub>2</sub>CH<sub>3</sub> → H<sub>2</sub>O<sub>2</sub> + CH<sub>3</sub>CHCH<sub>3</sub>****TS4: HO<sub>2</sub> + CH<sub>3</sub>CH<sub>2</sub>CH<sub>3</sub> → H<sub>2</sub>O<sub>2</sub> + CH<sub>3</sub>CHCH<sub>3</sub>**

|   |             |             |             |
|---|-------------|-------------|-------------|
| C | -3.48885600 | 1.89379900  | 0.07289100  |
| H | -3.11090400 | 2.41174000  | 0.95975800  |
| H | -3.22929100 | 2.51390700  | -0.79725800 |
| H | -4.57959000 | 1.85491600  | 0.13056500  |
| C | -2.88311300 | 0.51879800  | -0.05781500 |
| H | -3.36693400 | -0.11087100 | -0.80885600 |
| H | -3.26651800 | -0.13895800 | 1.05904800  |
| C | -1.37791700 | 0.42351800  | -0.04884900 |
| H | -1.03771100 | -0.61427100 | -0.05636900 |
| H | -0.95695500 | 0.91723600  | -0.93674200 |
| H | -0.95387300 | 0.91720500  | 0.83028300  |
| O | -3.59628900 | -0.68613700 | 2.06078200  |
| O | -3.28720700 | 0.22362700  | 3.10088600  |
| H | -4.15142400 | 0.61007000  | 3.30618500  |

**2.2.4 C4 (*n*-C<sub>4</sub>H<sub>10</sub>)****HO<sub>2</sub>-R5: HO<sub>2</sub> + CH<sub>3</sub>(CH<sub>2</sub>)<sub>2</sub>CH<sub>3</sub> → H<sub>2</sub>O<sub>2</sub> + CH<sub>2</sub>(CH<sub>2</sub>)<sub>2</sub>CH<sub>3</sub>****TS5: HO<sub>2</sub> + CH<sub>3</sub>(CH<sub>2</sub>)<sub>2</sub>CH<sub>3</sub> → H<sub>2</sub>O<sub>2</sub> + CH<sub>2</sub>(CH<sub>2</sub>)<sub>2</sub>CH<sub>3</sub>**

|   |             |            |             |
|---|-------------|------------|-------------|
| C | 0.42269200  | 1.54623300 | -0.03433400 |
| H | 0.25995900  | 2.08722100 | 0.89900500  |
| H | 1.36662600  | 0.62363700 | 0.36241900  |
| H | 0.98307000  | 2.12353200 | -0.76977600 |
| C | -0.73716700 | 0.74340400 | -0.55721500 |
| H | -1.44696000 | 1.43538400 | -1.04151100 |
| H | -0.39066700 | 0.07583500 | -1.35590900 |

|   |             |             |             |
|---|-------------|-------------|-------------|
| C | -1.47500800 | -0.06912500 | 0.51408000  |
| H | -0.76501300 | -0.75216600 | 0.99113500  |
| H | -1.82719400 | 0.61010600  | 1.29989700  |
| C | -2.65757500 | -0.86218500 | -0.04738000 |
| H | -2.32818100 | -1.57358100 | -0.81100900 |
| H | -3.16203100 | -1.43052700 | 0.73846000  |
| H | -3.39923900 | -0.20090700 | -0.50723700 |
| O | 2.14829200  | -0.18685400 | 0.65752200  |
| O | 2.15695400  | -1.10179200 | -0.42512600 |
| H | 2.95000900  | -0.83933300 | -0.91554900 |

**HO<sub>2</sub>-R6: HO<sub>2</sub> + CH<sub>3</sub>(CH<sub>2</sub>)<sub>2</sub>CH<sub>3</sub> → H<sub>2</sub>O<sub>2</sub> + CH<sub>3</sub>CHCH<sub>2</sub>CH<sub>3</sub>**

**TS6: HO<sub>2</sub> + CH<sub>3</sub>(CH<sub>2</sub>)<sub>2</sub>CH<sub>3</sub> → H<sub>2</sub>O<sub>2</sub> + CH<sub>3</sub>CHCH<sub>2</sub>CH<sub>3</sub>**

|   |             |             |             |
|---|-------------|-------------|-------------|
| C | -3.92949300 | 1.73325200  | -0.13823800 |
| H | -3.71676400 | 2.24274200  | 0.80668100  |
| H | -3.52029100 | 2.36209800  | -0.94177400 |
| H | -5.01296000 | 1.69429500  | -0.27609200 |
| C | -3.30915900 | 0.35890500  | -0.17421100 |
| H | -3.90170400 | -0.31830600 | 0.83549200  |
| H | -3.63637400 | -0.25570900 | -1.01834700 |
| C | -1.83158300 | 0.25506400  | 0.12481200  |
| H | -1.29076000 | 0.87740400  | -0.60681200 |
| H | -1.62968900 | 0.70805600  | 1.10289100  |
| C | -1.28294700 | -1.17418800 | 0.08526700  |
| H | -1.43644700 | -1.62935900 | -0.89812200 |
| H | -0.21027000 | -1.18755900 | 0.29414200  |
| H | -1.77956300 | -1.80255900 | 0.82847400  |
| O | -4.41807100 | -0.87168700 | 1.75301300  |
| O | -4.18441200 | -0.03356300 | 2.87113200  |
| H | -5.02972200 | 0.42958400  | 2.96753000  |

### 2.2.5 C5 (*n*-C<sub>5</sub>H<sub>10</sub>)

**HO<sub>2</sub>-R7: HO<sub>2</sub> + CH<sub>3</sub>(CH<sub>2</sub>)<sub>3</sub>CH<sub>3</sub> → H<sub>2</sub>O<sub>2</sub> + CH<sub>2</sub>(CH<sub>2</sub>)<sub>3</sub>CH<sub>3</sub>**

**TS7: HO<sub>2</sub> + CH<sub>3</sub>(CH<sub>2</sub>)<sub>3</sub>CH<sub>3</sub> → H<sub>2</sub>O<sub>2</sub> + CH<sub>2</sub>(CH<sub>2</sub>)<sub>3</sub>CH<sub>3</sub>**

|   |             |             |             |
|---|-------------|-------------|-------------|
| C | 1.26056500  | 1.48997700  | 0.40831700  |
| H | 1.36901800  | 1.25192800  | 1.46787200  |
| H | 1.95761300  | 0.44260100  | -0.15469200 |
| H | 1.87016300  | 2.33780700  | 0.09595200  |
| C | -0.13642900 | 1.42825900  | -0.14866100 |
| H | -0.68223700 | 2.32368700  | 0.19391800  |
| H | -0.10088500 | 1.51016100  | -1.24172500 |
| C | -0.92141200 | 0.17460700  | 0.25676700  |
| H | -0.37242100 | -0.71382700 | -0.07368700 |

|   |             |             |             |
|---|-------------|-------------|-------------|
| H | -0.96694300 | 0.11703700  | 1.35196300  |
| C | -2.34361900 | 0.14012000  | -0.31299900 |
| H | -2.29402600 | 0.19735100  | -1.40715300 |
| H | -2.88856400 | 1.03445600  | 0.01432800  |
| C | -3.12498900 | -1.11151100 | 0.09632600  |
| H | -4.13297300 | -1.10879400 | -0.32758900 |
| H | -2.62174800 | -2.02056400 | -0.24688700 |
| H | -3.22234600 | -1.17892900 | 1.18452200  |
| O | 2.55141500  | -0.42113500 | -0.66066300 |
| O | 2.48892400  | -1.50942600 | 0.24483800  |
| H | 3.35793600  | -1.47714200 | 0.67127800  |

**HO<sub>2</sub>-R8: HO<sub>2</sub> + CH<sub>3</sub>(CH<sub>2</sub>)<sub>3</sub>CH<sub>3</sub> → H<sub>2</sub>O<sub>2</sub> + CH<sub>3</sub>CH(CH<sub>2</sub>)<sub>2</sub>CH<sub>3</sub>**

**TS8: HO<sub>2</sub> + CH<sub>3</sub>(CH<sub>2</sub>)<sub>3</sub>CH<sub>3</sub> → H<sub>2</sub>O<sub>2</sub> + CH<sub>3</sub>CH(CH<sub>2</sub>)<sub>2</sub>CH<sub>3</sub>**

|   |             |             |             |
|---|-------------|-------------|-------------|
| C | -3.99555300 | 2.89315900  | 0.07412600  |
| H | -3.68448000 | 3.50449800  | 0.93325700  |
| H | -3.68280500 | 3.42676600  | -0.82863800 |
| H | -5.08731600 | 2.84405600  | 0.08875800  |
| C | -3.37101500 | 1.52192000  | 0.14678700  |
| H | -3.78546600 | 0.88550100  | 0.93437900  |
| H | -3.84387600 | 0.86779300  | -0.93795500 |
| C | -1.86891400 | 1.43460300  | 0.01205800  |
| H | -1.56140400 | 1.90619400  | -0.93009600 |
| H | -1.41565000 | 2.04692700  | 0.81015400  |
| C | -1.30518000 | 0.01021400  | 0.08846200  |
| H | -1.75529000 | -0.59328000 | -0.70620200 |
| H | -1.61246100 | -0.44669200 | 1.03691200  |
| C | 0.22040300  | -0.03385600 | -0.03091400 |
| H | 0.59304700  | -1.06001900 | 0.02622900  |
| H | 0.55345200  | 0.38692700  | -0.98470900 |
| H | 0.69969300  | 0.53902700  | 0.76961500  |
| O | -4.25673600 | 0.33598700  | -1.91890000 |
| O | -3.94115300 | 1.21876300  | -2.98095300 |
| H | -4.78500800 | 1.66695100  | -3.14029400 |

**HO<sub>2</sub>-R9: HO<sub>2</sub> + CH<sub>3</sub>(CH<sub>2</sub>)<sub>3</sub>CH<sub>3</sub> → H<sub>2</sub>O<sub>2</sub> + CH<sub>3</sub>CH<sub>2</sub>CHCH<sub>2</sub>CH<sub>3</sub>**

**TS9: HO<sub>2</sub> + CH<sub>3</sub>(CH<sub>2</sub>)<sub>3</sub>CH<sub>3</sub> → H<sub>2</sub>O<sub>2</sub> + CH<sub>3</sub>CH<sub>2</sub>CHCH<sub>2</sub>CH<sub>3</sub>**

|   |             |            |             |
|---|-------------|------------|-------------|
| C | -3.96262100 | 3.02364500 | 0.52308400  |
| H | -3.72982300 | 3.19953400 | 1.57789200  |
| H | -3.51969200 | 3.83472700 | -0.05960100 |
| H | -5.04809000 | 3.07873700 | 0.40794700  |
| C | -3.43044300 | 1.66438600 | 0.05918700  |
| H | -3.91852800 | 0.86184100 | 0.63557300  |

|   |             |             |             |
|---|-------------|-------------|-------------|
| H | -3.71150900 | 1.48996100  | -0.98629900 |
| C | -1.93480400 | 1.50450900  | 0.20579200  |
| H | -1.42781500 | 2.42410500  | -0.64884800 |
| H | -1.53539800 | 1.89446900  | 1.14837300  |
| C | -1.32479900 | 0.18800400  | -0.21638000 |
| H | -1.60815800 | -0.02806500 | -1.25426400 |
| H | -1.78845400 | -0.61245800 | 0.38200400  |
| C | 0.19737800  | 0.12021000  | -0.05729100 |
| H | 0.58293200  | -0.85388600 | -0.36913200 |
| H | 0.69216200  | 0.88846900  | -0.65747600 |
| H | 0.49107800  | 0.27576800  | 0.98515900  |
| O | -1.01880500 | 3.20576700  | -1.44841400 |
| O | -1.61074500 | 2.82083700  | -2.67731600 |
| H | -0.89071300 | 2.34669300  | -3.11892900 |

## 2.2.6 C6 (*n*-C<sub>6</sub>H<sub>14</sub>)

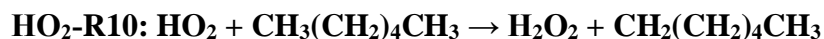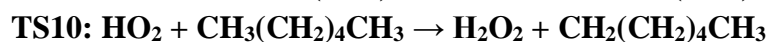

|   |             |             |             |
|---|-------------|-------------|-------------|
| C | -1.98870100 | 1.42727500  | -0.33561800 |
| H | -2.12100900 | 1.20046700  | -1.39494500 |
| H | -2.55019300 | 0.29985000  | 0.22506200  |
| H | -2.66566700 | 2.20194500  | 0.02425700  |
| C | -0.56863900 | 1.49791000  | 0.15758100  |
| H | -0.13204900 | 2.44906600  | -0.19161200 |
| H | -0.56060200 | 1.55962200  | 1.25254400  |
| C | 0.31978500  | 0.33695100  | -0.30773300 |
| H | -0.11115900 | -0.60664200 | 0.04395900  |
| H | 0.30476000  | 0.29142000  | -1.40418700 |
| C | 1.76835800  | 0.45366200  | 0.17730200  |
| H | 2.19498000  | 1.40346600  | -0.17195600 |
| H | 1.78071100  | 0.50024600  | 1.27410700  |
| C | 2.66342700  | -0.70122300 | -0.28629300 |
| H | 2.23787900  | -1.64901100 | 0.06427100  |
| H | 2.65051600  | -0.74955400 | -1.38200600 |
| C | 4.10980000  | -0.57851000 | 0.20157800  |
| H | 4.15882600  | -0.56408100 | 1.29504600  |
| H | 4.72120000  | -1.41574800 | -0.14634600 |
| H | 4.57315200  | 0.34440800  | -0.16165600 |
| O | -3.03092000 | -0.63500400 | 0.72317800  |
| O | -3.01608000 | -1.64571800 | -0.27010400 |
| H | -3.92952000 | -1.63607000 | -0.59202800 |

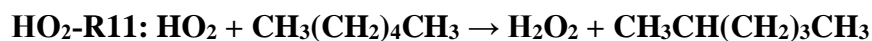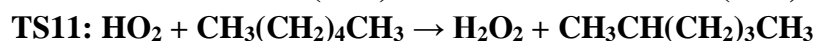

|   |             |             |             |
|---|-------------|-------------|-------------|
| C | -3.63919900 | 2.58704400  | -0.31661700 |
| H | -3.53408100 | 3.02248600  | 0.68120700  |
| H | -3.18655400 | 3.28924600  | -1.03138600 |
| H | -4.70419200 | 2.52024200  | -0.54929400 |
| C | -2.96470300 | 1.24052300  | -0.40219500 |
| H | -3.63847500 | 0.48636600  | 0.49462000  |
| H | -3.19484100 | 0.68276100  | -1.31495800 |
| C | -1.51404800 | 1.16196700  | 0.01236000  |
| H | -0.94083400 | 1.87493800  | -0.60357000 |
| H | -1.41038700 | 1.52578500  | 1.04351500  |
| C | -0.88712500 | -0.23094800 | -0.12009500 |
| H | -1.46034200 | -0.94593700 | 0.48234100  |
| H | -0.97989700 | -0.56938400 | -1.15992100 |
| C | 0.58721000  | -0.27750800 | 0.29654900  |
| H | 1.15623600  | 0.44009200  | -0.30711700 |
| H | 0.68021600  | 0.06070400  | 1.33601900  |
| C | 1.21029400  | -1.66917700 | 0.15592700  |
| H | 1.16728700  | -2.01886300 | -0.88030800 |
| H | 2.25974600  | -1.66915300 | 0.46284200  |
| H | 0.68338400  | -2.40326200 | 0.77356900  |
| O | -4.22872300 | -0.13467800 | 1.32076500  |
| O | -3.93074900 | 0.50651800  | 2.54861600  |
| H | -3.26159200 | -0.07790700 | 2.93457900  |

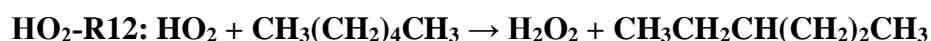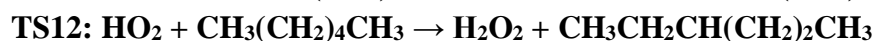

|   |             |             |             |
|---|-------------|-------------|-------------|
| C | -3.44998600 | 2.82622200  | 0.42267500  |
| H | -3.15391000 | 3.14644000  | 1.42654400  |
| H | -3.04182700 | 3.54326900  | -0.29338700 |
| H | -4.54037300 | 2.87521200  | 0.36595900  |
| C | -2.94863400 | 1.41025700  | 0.12347700  |
| H | -3.40250300 | 0.70121400  | 0.83462100  |
| H | -3.29195000 | 1.09392700  | -0.86867400 |
| C | -1.44699300 | 1.25657700  | 0.20200500  |
| H | -0.99171300 | 2.05512800  | -0.79090900 |
| H | -0.99311100 | 1.76044000  | 1.06217600  |
| C | -0.86780800 | -0.10977500 | -0.08156900 |
| H | -1.29961800 | -0.82398900 | 0.63924200  |
| H | -1.20933300 | -0.45489100 | -1.06678800 |
| C | 0.66213600  | -0.18546300 | -0.00202000 |
| H | 1.09561700  | 0.52612900  | -0.71311000 |



|   |             |             |             |
|---|-------------|-------------|-------------|
| H | 0.98528500  | 0.14446700  | 0.99233900  |
| C | 1.20724300  | -1.58960500 | -0.27662800 |
| H | 0.92572800  | -1.93636500 | -1.27618700 |
| H | 2.29842200  | -1.61180200 | -0.21373200 |
| H | 0.81825500  | -2.31499100 | 0.44497900  |
| O | -0.63240100 | 2.72817000  | -1.70603400 |
| O | -1.28662900 | 2.18781700  | -2.84114800 |
| H | -0.58796500 | 1.66104500  | -3.25666900 |

### 2.2.7 C7 (*n*-C<sub>7</sub>H<sub>16</sub>)

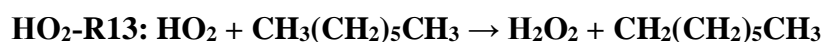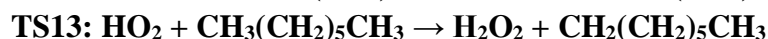

|   |             |             |             |
|---|-------------|-------------|-------------|
| C | -2.74081800 | -1.27969300 | 0.39427900  |
| H | -2.81939400 | -1.02728900 | 1.45310600  |
| H | -3.15161500 | -0.09533300 | -0.17796400 |
| H | -3.52536000 | -1.95683800 | 0.05668200  |
| C | -1.35426400 | -1.54874100 | -0.12588600 |
| H | -1.04758300 | -2.55216400 | 0.21497400  |
| H | -1.37710600 | -1.60855200 | -1.22079100 |
| C | -0.30457700 | -0.52265600 | 0.31995100  |
| H | -0.62260000 | 0.47563800  | 0.00064800  |
| H | -0.27083500 | -0.49759000 | 1.41665400  |
| C | 1.09657100  | -0.81515500 | -0.22656700 |
| H | 1.05887500  | -0.83452800 | -1.32342400 |
| H | 1.40780400  | -1.82124100 | 0.08480900  |
| C | 2.15130300  | 0.20175600  | 0.22322800  |
| H | 2.19513200  | 0.21763400  | 1.32016200  |
| H | 1.83595400  | 1.20784000  | -0.08180000 |
| C | 3.55198300  | -0.07814100 | -0.33285000 |
| H | 3.50780400  | -0.09338600 | -1.42868000 |
| H | 3.86746700  | -1.08359500 | -0.02789000 |
| C | 4.59877300  | 0.94364400  | 0.12062000  |
| H | 4.68896700  | 0.95997300  | 1.21147500  |
| H | 5.58595000  | 0.71440400  | -0.29038900 |
| H | 4.33087800  | 1.95439600  | -0.20308000 |
| O | -3.50742600 | 0.88549100  | -0.69419400 |
| O | -3.19358100 | 1.92971500  | 0.21100300  |
| H | -4.05011400 | 2.11290600  | 0.62438300  |

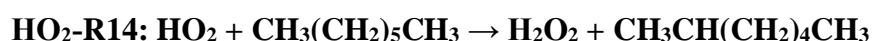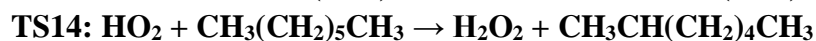

|   |             |            |            |
|---|-------------|------------|------------|
| C | -4.31894100 | 3.05553700 | 0.20225900 |
| H | -3.93443900 | 3.74952500 | 0.96323100 |

|   |             |             |             |
|---|-------------|-------------|-------------|
| H | -4.11811800 | 3.50729800  | -0.77401200 |
| H | -5.40132100 | 2.99028600  | 0.33945600  |
| C | -3.65455100 | 1.70748100  | 0.33213400  |
| H | -3.96573400 | 1.14177800  | 1.21547600  |
| H | -4.22214500 | 0.94599600  | -0.62973500 |
| C | -2.17362400 | 1.63168300  | 0.04250800  |
| H | -1.98380600 | 2.00739000  | -0.97097700 |
| H | -1.65463900 | 2.33178900  | 0.71885300  |
| C | -1.56700700 | 0.23229100  | 0.20153700  |
| H | -2.08557500 | -0.46009900 | -0.47069800 |
| H | -1.75384200 | -0.12737100 | 1.22159300  |
| C | -0.06196900 | 0.19082700  | -0.08299100 |
| H | 0.45562300  | 0.89351700  | 0.58367900  |
| H | 0.12254300  | 0.54856100  | -1.10417200 |
| C | 0.55359200  | -1.20364400 | 0.08002500  |
| H | 0.03612500  | -1.90497700 | -0.58534600 |
| H | 0.37060600  | -1.56151600 | 1.10054800  |
| C | 2.05677400  | -1.23809900 | -0.21077900 |
| H | 2.60587400  | -0.57360800 | 0.46408700  |
| H | 2.46478200  | -2.24535300 | -0.08911800 |
| H | 2.26816300  | -0.91567600 | -1.23526200 |
| O | -4.72068400 | 0.31607700  | -1.50780800 |
| O | -4.53141900 | 1.09312800  | -2.67705700 |
| H | -5.39535200 | 1.51613800  | -2.79132200 |

**HO<sub>2</sub>-R15: HO<sub>2</sub> + CH<sub>3</sub>(CH<sub>2</sub>)<sub>5</sub>CH<sub>3</sub> → H<sub>2</sub>O<sub>2</sub> + CH<sub>3</sub>CH<sub>2</sub>CH(CH<sub>2</sub>)<sub>3</sub>CH<sub>3</sub>**

**TS15: HO<sub>2</sub> + CH<sub>3</sub>(CH<sub>2</sub>)<sub>5</sub>CH<sub>3</sub> → H<sub>2</sub>O<sub>2</sub> + CH<sub>3</sub>CH<sub>2</sub>CH(CH<sub>2</sub>)<sub>3</sub>CH<sub>3</sub>**

|   |             |             |             |
|---|-------------|-------------|-------------|
| C | -4.24807300 | 3.13116100  | 0.09807700  |
| H | -3.90834000 | 3.65651400  | 0.99592400  |
| H | -3.91981500 | 3.70763000  | -0.76949200 |
| H | -5.34103400 | 3.12568300  | 0.10891400  |
| C | -3.69497300 | 1.70319900  | 0.05315700  |
| H | -4.06891700 | 1.13826500  | 0.92248500  |
| H | -4.08364700 | 1.17782800  | -0.82734100 |
| C | -2.18517700 | 1.62075600  | 0.05812900  |
| H | -1.80941800 | 2.23615500  | -1.08818400 |
| H | -1.70972300 | 2.29327600  | 0.78086000  |
| C | -1.56050300 | 0.24541000  | 0.00085200  |
| H | -1.93754400 | -0.29260100 | -0.87838900 |
| H | -1.91866000 | -0.32933800 | 0.87121800  |
| C | -0.02698500 | 0.23942400  | -0.00441000 |
| H | 0.33838800  | 0.77648800  | 0.88061900  |
| H | 0.33119500  | 0.79928300  | -0.87600600 |

|   |             |             |             |
|---|-------------|-------------|-------------|
| C | 0.57484900  | -1.17005900 | -0.02375100 |
| H | 0.20663200  | -1.70641400 | -0.90657600 |
| H | 0.21195600  | -1.73099000 | 0.84629200  |
| C | 2.10614900  | -1.17087900 | -0.02902100 |
| H | 2.50504500  | -0.67057600 | 0.85918400  |
| H | 2.50520600  | -2.18876300 | -0.04364900 |
| H | 2.49816100  | -0.64778500 | -0.90689900 |
| O | -1.48768700 | 2.72674100  | -2.12428500 |
| O | -1.29280900 | 4.10345300  | -1.85353900 |
| H | -0.32980900 | 4.16938400  | -1.77384200 |

**HO<sub>2</sub>-R16: HO<sub>2</sub> + CH<sub>3</sub>(CH<sub>2</sub>)<sub>5</sub>CH<sub>3</sub> → H<sub>2</sub>O<sub>2</sub> + CH<sub>3</sub>(CH<sub>2</sub>)<sub>2</sub>CH(CH<sub>2</sub>)<sub>2</sub>CH<sub>3</sub>**

**TS16: HO<sub>2</sub> + CH<sub>3</sub>(CH<sub>2</sub>)<sub>5</sub>CH<sub>3</sub> → H<sub>2</sub>O<sub>2</sub> + CH<sub>3</sub>(CH<sub>2</sub>)<sub>2</sub>CH(CH<sub>2</sub>)<sub>2</sub>CH<sub>3</sub>**

|   |             |             |             |
|---|-------------|-------------|-------------|
| C | -4.19561700 | 3.12376400  | -0.00694500 |
| H | -3.80046300 | 3.76890900  | 0.78459700  |
| H | -3.94275500 | 3.58401600  | -0.96708300 |
| H | -5.28532300 | 3.11999400  | 0.08126100  |
| C | -3.62548000 | 1.70627500  | 0.09180200  |
| H | -3.92279000 | 1.25653000  | 1.04684400  |
| H | -4.05793200 | 1.07901500  | -0.69386800 |
| C | -2.09693300 | 1.66981000  | -0.02610000 |
| H | -1.78869000 | 2.13025100  | -0.97341500 |
| H | -1.65711800 | 2.29924200  | 0.76579700  |
| C | -1.49306300 | 0.28834700  | 0.07790300  |
| H | -1.95999200 | -0.34838300 | -1.02030200 |
| H | -1.94383200 | -0.33806500 | 0.85499700  |
| C | 0.01177200  | 0.17545300  | 0.00055800  |
| H | 0.44474000  | 0.77442300  | 0.81896500  |
| H | 0.36827100  | 0.65147400  | -0.92282400 |
| C | 0.55071400  | -1.25800100 | 0.09285400  |
| H | 0.11852600  | -1.85797600 | -0.71523600 |
| H | 0.20143200  | -1.71095900 | 1.02821300  |
| C | 2.07879700  | -1.32864900 | 0.03024200  |
| H | 2.53649200  | -0.76443700 | 0.84902100  |
| H | 2.43186100  | -2.36089300 | 0.10066900  |
| H | 2.45740700  | -0.91229500 | -0.90873500 |
| O | -2.35435400 | -0.85456200 | -2.02488100 |
| O | -2.00418200 | 0.05135200  | -3.05709400 |
| H | -1.21094100 | -0.35581200 | -3.43553300 |

## 2.2.8 C8 (*n*-C<sub>8</sub>H<sub>18</sub>)

**HO<sub>2</sub>-R17: HO<sub>2</sub> + CH<sub>3</sub>(CH<sub>2</sub>)<sub>6</sub>CH<sub>3</sub> → H<sub>2</sub>O<sub>2</sub> + CH<sub>2</sub>(CH<sub>2</sub>)<sub>6</sub>CH<sub>3</sub>**

**TS17: HO<sub>2</sub> + CH<sub>3</sub>(CH<sub>2</sub>)<sub>6</sub>CH<sub>3</sub> → H<sub>2</sub>O<sub>2</sub> + CH<sub>2</sub>(CH<sub>2</sub>)<sub>6</sub>CH<sub>3</sub>**

|   |             |             |             |
|---|-------------|-------------|-------------|
| C | -3.38401900 | -1.23271300 | 0.33778700  |
| H | -3.47816500 | -0.99451500 | 1.39864400  |
| H | -3.74886700 | -0.02795200 | -0.22288800 |
| H | -4.18041700 | -1.88122100 | -0.02717700 |
| C | -1.99507300 | -1.53495400 | -0.15673700 |
| H | -1.99504900 | -1.57616800 | -1.25273500 |
| H | -1.72672900 | -2.55283900 | 0.17351200  |
| C | -0.92454700 | -0.54977000 | 0.32972300  |
| H | -1.19927700 | 0.46227500  | 0.01339700  |
| H | -0.92067900 | -0.53773500 | 1.42718200  |
| C | 0.48064500  | -0.88449100 | -0.18113200 |
| H | 0.47374200  | -0.88897500 | -1.27876900 |
| H | 0.74738400  | -1.90470600 | 0.12540500  |
| C | 1.55683600  | 0.08908600  | 0.31223000  |
| H | 1.56936800  | 0.08834500  | 1.40995700  |
| H | 1.28434500  | 1.10919700  | 0.01294600  |
| C | 2.96150800  | -0.23279900 | -0.20938800 |
| H | 2.94941100  | -0.22996800 | -1.30722100 |
| H | 3.23434100  | -1.25410400 | 0.08782900  |
| C | 4.03877600  | 0.73969900  | 0.28418100  |
| H | 4.05326300  | 0.73510100  | 1.38099100  |
| H | 3.76498300  | 1.76000000  | -0.01096100 |
| C | 5.43812800  | 0.41403200  | -0.24583100 |
| H | 5.46383100  | 0.44569600  | -1.33975400 |
| H | 6.18185200  | 1.12550800  | 0.12389000  |
| H | 5.75517200  | -0.58750600 | 0.06227400  |
| O | -4.06647000 | 0.97035100  | -0.73056400 |
| O | -3.76266800 | 1.98951100  | 0.20610600  |
| H | -4.62893400 | 2.18213100  | 0.59414600  |

**HO<sub>2</sub>-R18: HO<sub>2</sub> + CH<sub>3</sub>(CH<sub>2</sub>)<sub>6</sub>CH<sub>3</sub> → H<sub>2</sub>O<sub>2</sub> + CH<sub>3</sub>CH(CH<sub>2</sub>)<sub>5</sub>CH<sub>3</sub>**

**TS18: HO<sub>2</sub> + CH<sub>3</sub>(CH<sub>2</sub>)<sub>6</sub>CH<sub>3</sub> → H<sub>2</sub>O<sub>2</sub> + CH<sub>3</sub>CH(CH<sub>2</sub>)<sub>5</sub>CH<sub>3</sub>**

|   |             |            |             |
|---|-------------|------------|-------------|
| C | -4.82744100 | 3.05965600 | -0.00626400 |
| H | -4.42296100 | 3.64336100 | 0.82658900  |
| H | -4.62288900 | 3.62454100 | -0.92708100 |
| H | -5.91315800 | 3.00257400 | 0.10452000  |
| C | -4.20316100 | 1.68883600 | -0.07674300 |
| H | -4.65306600 | 1.03837200 | -0.83234300 |
| H | -4.64660600 | 1.05099600 | 1.03234100  |
| C | -2.69623100 | 1.59914400 | -0.01251400 |
| H | -2.28176200 | 2.15438500 | -0.87082000 |
| H | -2.33671000 | 2.12813600 | 0.87948000  |
| C | -2.14441400 | 0.16764500 | -0.02778500 |

|   |             |             |             |
|---|-------------|-------------|-------------|
| H | -2.50830900 | -0.34809300 | -0.92533500 |
| H | -2.54905800 | -0.38524400 | 0.82766500  |
| C | -0.61356100 | 0.10981800  | 0.00528300  |
| H | -0.25182700 | 0.62563200  | 0.90422200  |
| H | -0.21037900 | 0.66948700  | -0.84904100 |
| C | -0.05505900 | -1.31744800 | -0.01675600 |
| H | -0.41509900 | -1.83374800 | -0.91624100 |
| H | -0.45935100 | -1.87773900 | 0.83610600  |
| C | 1.47596900  | -1.37922100 | 0.01997700  |
| H | 1.83564700  | -0.86572100 | 0.91999500  |
| H | 1.88016600  | -0.81811000 | -0.83152700 |
| C | 2.02462300  | -2.80894500 | -0.00502200 |
| H | 1.71079400  | -3.33729700 | -0.91094100 |
| H | 3.11781700  | -2.81868600 | 0.02269900  |
| H | 1.66559200  | -3.38545600 | 0.85342900  |
| O | -5.01902200 | 0.52780100  | 2.03314300  |
| O | -6.32508200 | 1.02755400  | 2.25717700  |
| H | -6.17831600 | 1.70546400  | 2.93337800  |

**HO<sub>2</sub>-R19: HO<sub>2</sub> + CH<sub>3</sub>(CH<sub>2</sub>)<sub>6</sub>CH<sub>3</sub> → H<sub>2</sub>O<sub>2</sub> + CH<sub>3</sub>CH<sub>2</sub>CH(CH<sub>2</sub>)<sub>4</sub>CH<sub>3</sub>**

**TS19: HO<sub>2</sub> + CH<sub>3</sub>(CH<sub>2</sub>)<sub>6</sub>CH<sub>3</sub> → H<sub>2</sub>O<sub>2</sub> + CH<sub>3</sub>CH<sub>2</sub>CH(CH<sub>2</sub>)<sub>4</sub>CH<sub>3</sub>**

|   |             |             |             |
|---|-------------|-------------|-------------|
| C | -4.94768600 | 3.01020700  | -0.06919700 |
| H | -4.63279700 | 3.56991700  | 0.81415100  |
| H | -4.60225900 | 3.55736800  | -0.95172400 |
| H | -6.04041200 | 2.99741100  | -0.09190200 |
| C | -4.38506400 | 1.58544900  | -0.04933100 |
| H | -4.74561300 | 1.03705900  | -0.93475800 |
| H | -4.77959000 | 1.03837100  | 0.81522500  |
| C | -2.87471500 | 1.51309300  | -0.03949300 |
| H | -2.39596000 | 2.20443800  | -0.74200500 |
| H | -2.51560200 | 2.10529400  | 1.12405800  |
| C | -2.24176600 | 0.14085300  | -0.00539000 |
| H | -2.58929400 | -0.41804500 | -0.89023600 |
| H | -2.62265000 | -0.41752300 | 0.85937200  |
| C | -0.70808400 | 0.14373000  | 0.01234800  |
| H | -0.36089700 | 0.68744400  | 0.89833200  |
| H | -0.33948800 | 0.70149100  | -0.85826100 |
| C | -0.09994000 | -1.26278500 | 0.00690100  |
| H | -0.45314700 | -1.80893300 | -0.87776100 |
| H | -0.47109300 | -1.82084900 | 0.87626300  |
| C | 1.43284400  | -1.26801900 | 0.02301400  |
| H | 1.78510900  | -0.72350700 | 0.90748500  |
| H | 1.80433700  | -0.71008000 | -0.84532100 |

|   |             |             |             |
|---|-------------|-------------|-------------|
| C | 2.03331600  | -2.67670900 | 0.01868600  |
| H | 1.72685500  | -3.23507300 | -0.87160700 |
| H | 3.12631400  | -2.64515500 | 0.03027900  |
| H | 1.70856000  | -3.24785900 | 0.89416000  |
| O | -2.20786200 | 2.57536400  | 2.17400000  |
| O | -2.02053200 | 3.95908700  | 1.93561500  |
| H | -1.05739400 | 4.03345900  | 1.86561200  |

**HO<sub>2</sub>-R20: HO<sub>2</sub> + CH<sub>3</sub>(CH<sub>2</sub>)<sub>6</sub>CH<sub>3</sub> → H<sub>2</sub>O<sub>2</sub> + CH<sub>3</sub>(CH<sub>2</sub>)<sub>2</sub>CH(CH<sub>2</sub>)<sub>3</sub>CH<sub>3</sub>**

**TS20: HO<sub>2</sub> + CH<sub>3</sub>(CH<sub>2</sub>)<sub>6</sub>CH<sub>3</sub> → H<sub>2</sub>O<sub>2</sub> + CH<sub>3</sub>(CH<sub>2</sub>)<sub>2</sub>CH(CH<sub>2</sub>)<sub>3</sub>CH<sub>3</sub>**

|   |             |             |             |
|---|-------------|-------------|-------------|
| C | -4.92659600 | 3.08351600  | -0.18763200 |
| H | -4.74730800 | 3.53453400  | 0.79324500  |
| H | -4.47598700 | 3.73788900  | -0.94106400 |
| H | -6.00675800 | 3.07805800  | -0.35643800 |
| C | -4.34658000 | 1.66848600  | -0.25886400 |
| H | -4.57370700 | 1.22785300  | -1.23719600 |
| H | -4.83240400 | 1.03242400  | 0.48757900  |
| C | -2.83020600 | 1.63392900  | -0.03249700 |
| H | -2.33710700 | 2.27392100  | -0.78349200 |
| H | -2.59163100 | 2.08360000  | 0.93982700  |
| C | -2.21617200 | 0.25525700  | -0.11049400 |
| H | -2.60725700 | -0.36115800 | -0.92685400 |
| H | -2.75946000 | -0.39759800 | 0.94192200  |
| C | -0.72041900 | 0.14513500  | 0.07452700  |
| H | -0.43574900 | 0.60040400  | 1.03256600  |
| H | -0.23230500 | 0.76563400  | -0.69519600 |
| C | -0.16981800 | -1.28381900 | -0.01245100 |
| H | -0.44670200 | -1.71677200 | -0.98206600 |
| H | -0.65576900 | -1.90670300 | 0.74780000  |
| C | 1.35114500  | -1.36055100 | 0.15889300  |
| H | 1.62782700  | -0.92665800 | 1.12769000  |
| H | 1.83305800  | -0.73433700 | -0.60192000 |
| C | 1.89744000  | -2.78821600 | 0.06486900  |
| H | 1.66815900  | -3.23594300 | -0.90720000 |
| H | 2.98325300  | -2.80956900 | 0.19201400  |
| H | 1.45983500  | -3.43110700 | 0.83503900  |
| O | -3.22221200 | -0.91834400 | 1.90928500  |
| O | -2.93765900 | -0.03161400 | 2.97766900  |
| H | -2.17252500 | -0.44867600 | 3.40059400  |

## 2.2.9 C9 (*n*-C<sub>9</sub>H<sub>20</sub>)

**HO<sub>2</sub>-R21: HO<sub>2</sub> + CH<sub>3</sub>(CH<sub>2</sub>)<sub>7</sub>CH<sub>3</sub> → H<sub>2</sub>O<sub>2</sub> + CH<sub>2</sub>(CH<sub>2</sub>)<sub>7</sub>CH<sub>3</sub>**

**TS21: HO<sub>2</sub> + CH<sub>3</sub>(CH<sub>2</sub>)<sub>7</sub>CH<sub>3</sub> → H<sub>2</sub>O<sub>2</sub> + CH<sub>2</sub>(CH<sub>2</sub>)<sub>7</sub>CH<sub>3</sub>**

|   |             |             |             |
|---|-------------|-------------|-------------|
| C | -4.03199800 | -1.10234100 | 0.39667000  |
| H | -4.09371300 | -0.81756300 | 1.44842000  |
| H | -4.34054100 | 0.10024000  | -0.20192900 |
| H | -4.86937400 | -1.71923000 | 0.07067500  |
| C | -2.67107800 | -1.50259200 | -0.10586500 |
| H | -2.69367900 | -1.59503600 | -1.19844000 |
| H | -2.45310700 | -2.51727500 | 0.26838800  |
| C | -1.53851600 | -0.55794500 | 0.31640200  |
| H | -1.75284600 | 0.44848100  | -0.05873300 |
| H | -1.52541600 | -0.48116800 | 1.41112700  |
| C | -0.16045400 | -1.01005100 | -0.17823200 |
| H | -0.17578400 | -1.08296700 | -1.27338400 |
| H | 0.04421400  | -2.02365100 | 0.19114400  |
| C | 0.97837000  | -0.07737200 | 0.24918200  |
| H | 0.99225400  | -0.00208400 | 1.34426500  |
| H | 0.77453300  | 0.93499100  | -0.12181400 |
| C | 2.35799000  | -0.52930800 | -0.24323400 |
| H | 2.34411500  | -0.60376100 | -1.33839100 |
| H | 2.55974700  | -1.54293300 | 0.12706400  |
| C | 3.49881500  | 0.40048500  | 0.18471100  |
| H | 3.51267300  | 0.47700700  | 1.27991900  |
| H | 3.29933100  | 1.41397400  | -0.18699300 |
| C | 4.87902600  | -0.05263000 | -0.30527300 |
| H | 4.86578300  | -0.12825300 | -1.39947200 |
| H | 5.07857800  | -1.06517200 | 0.06634600  |
| C | 6.01272900  | 0.88183300  | 0.12714100  |
| H | 6.07529700  | 0.94963000  | 1.21793500  |
| H | 6.98188000  | 0.53194800  | -0.23943600 |
| H | 5.85851400  | 1.89499500  | -0.25752300 |
| O | -4.61179900 | 1.09844800  | -0.73522300 |
| O | -4.29656200 | 2.12360400  | 0.19107200  |
| H | -5.16486900 | 2.35093200  | 0.55502500  |

**HO<sub>2</sub>-R22: HO<sub>2</sub> + CH<sub>3</sub>(CH<sub>2</sub>)<sub>7</sub>CH<sub>3</sub> → H<sub>2</sub>O<sub>2</sub> + CH<sub>3</sub>CH(CH<sub>2</sub>)<sub>6</sub>CH<sub>3</sub>**

**TS22: HO<sub>2</sub> + CH<sub>3</sub>(CH<sub>2</sub>)<sub>7</sub>CH<sub>3</sub> → H<sub>2</sub>O<sub>2</sub> + CH<sub>3</sub>CH(CH<sub>2</sub>)<sub>6</sub>CH<sub>3</sub>**

|   |             |            |            |
|---|-------------|------------|------------|
| C | -2.17925600 | 4.47884200 | 1.45667100 |
| H | -1.32040500 | 4.68601800 | 2.10271400 |
| H | -2.03364700 | 5.05284800 | 0.53034400 |
| H | -3.07922400 | 4.86675700 | 1.94028700 |
| C | -2.30194500 | 3.00672700 | 1.15358900 |
| H | -3.20781400 | 2.74547100 | 0.59892100 |
| H | -2.61818800 | 2.43648600 | 2.33981700 |
| C | -1.06491100 | 2.28146800 | 0.67741700 |

|   |             |             |             |
|---|-------------|-------------|-------------|
| H | -0.74238500 | 2.74012000  | -0.27259800 |
| H | -0.24267900 | 2.45883000  | 1.38244300  |
| C | -1.25457200 | 0.77382500  | 0.46639600  |
| H | -2.08722500 | 0.61042100  | -0.22937100 |
| H | -1.55286000 | 0.31095800  | 1.41400000  |
| C | -0.00011100 | 0.07684400  | -0.07128500 |
| H | 0.83452600  | 0.24893900  | 0.62065800  |
| H | 0.29317400  | 0.54085800  | -1.02221000 |
| C | -0.17963700 | -1.43116000 | -0.27943500 |
| H | -1.02131700 | -1.60415200 | -0.96257400 |
| H | -0.46227600 | -1.89612000 | 0.67363300  |
| C | 1.06942700  | -2.12688000 | -0.83167200 |
| H | 1.91294100  | -1.95185400 | -0.15097600 |
| H | 1.34984900  | -1.66355000 | -1.78680600 |
| C | 0.89370700  | -3.63583500 | -1.03718200 |
| H | 0.04824100  | -3.81125600 | -1.71360800 |
| H | 0.61919400  | -4.10003300 | -0.08215300 |
| C | 2.14423300  | -4.32064800 | -1.59636700 |
| H | 2.99922400  | -4.19254600 | -0.92485600 |
| H | 1.98618400  | -5.39439900 | -1.73067300 |
| H | 2.42304300  | -3.90202000 | -2.56867300 |
| O | -2.85726200 | 1.95549600  | 3.40157300  |
| O | -3.66371500 | 2.90576000  | 4.07395600  |
| H | -3.03049300 | 3.33879800  | 4.66542500  |

**HO<sub>2</sub>-R23: HO<sub>2</sub> + CH<sub>3</sub>(CH<sub>2</sub>)<sub>7</sub>CH<sub>3</sub> → H<sub>2</sub>O<sub>2</sub> + CH<sub>3</sub>CH<sub>2</sub>CH(CH<sub>2</sub>)<sub>5</sub>CH<sub>3</sub>**

**TS23: HO<sub>2</sub> + CH<sub>3</sub>(CH<sub>2</sub>)<sub>7</sub>CH<sub>3</sub> → H<sub>2</sub>O<sub>2</sub> + CH<sub>3</sub>CH<sub>2</sub>CH(CH<sub>2</sub>)<sub>5</sub>CH<sub>3</sub>**

|   |             |            |             |
|---|-------------|------------|-------------|
| C | -2.39962900 | 4.42264900 | 1.48483300  |
| H | -1.66747900 | 4.58289000 | 2.27924200  |
| H | -2.04802200 | 4.95369400 | 0.59489800  |
| H | -3.34296700 | 4.87983600 | 1.79441200  |
| C | -2.58489100 | 2.92936700 | 1.19725000  |
| H | -3.35114400 | 2.79968800 | 0.41571100  |
| H | -2.98257300 | 2.42300600 | 2.08487000  |
| C | -1.32810400 | 2.22399100 | 0.73966200  |
| H | -0.75555300 | 2.78550900 | -0.00711600 |
| H | -0.47734600 | 2.32903100 | 1.78827500  |
| C | -1.42262700 | 0.74361200 | 0.44874500  |
| H | -2.17401000 | 0.59844600 | -0.34524300 |
| H | -1.82290400 | 0.22198900 | 1.32755100  |
| C | -0.10334200 | 0.09306500 | 0.01367800  |
| H | 0.63944000  | 0.22462100 | 0.80855800  |
| H | 0.28593600  | 0.62307800 | -0.86524700 |



|   |             |             |             |
|---|-------------|-------------|-------------|
| C | -0.24114800 | -1.39759100 | -0.31439800 |
| H | -0.98441700 | -1.52720400 | -1.11196500 |
| H | -0.64045200 | -1.92470000 | 0.56166100  |
| C | 1.07667800  | -2.05425300 | -0.74011200 |
| H | 1.81801400  | -1.92859700 | 0.05972900  |
| H | 1.48019900  | -1.52521400 | -1.61356300 |
| C | 0.94259600  | -3.54463300 | -1.07257200 |
| H | 0.20483300  | -3.67034500 | -1.87447600 |
| H | 0.53668000  | -4.07286200 | -0.20122000 |
| C | 2.26530900  | -4.19332800 | -1.49070800 |
| H | 3.01285500  | -4.11589300 | -0.69485500 |
| H | 2.13512700  | -5.25444200 | -1.72086100 |
| H | 2.68000200  | -3.70937100 | -2.38078700 |
| O | 0.25868300  | 2.36518300  | 2.72354800  |
| O | 0.97109300  | 3.58380200  | 2.60638800  |
| H | 1.81594800  | 3.29993700  | 2.22728500  |

**HO<sub>2</sub>-R24: HO<sub>2</sub> + CH<sub>3</sub>(CH<sub>2</sub>)<sub>7</sub>CH<sub>3</sub> → H<sub>2</sub>O<sub>2</sub> + CH<sub>3</sub>(CH<sub>2</sub>)<sub>2</sub>CH(CH<sub>2</sub>)<sub>4</sub>CH<sub>3</sub>**

**TS24: HO<sub>2</sub> + CH<sub>3</sub>(CH<sub>2</sub>)<sub>7</sub>CH<sub>3</sub> → H<sub>2</sub>O<sub>2</sub> + CH<sub>3</sub>(CH<sub>2</sub>)<sub>2</sub>CH(CH<sub>2</sub>)<sub>4</sub>CH<sub>3</sub>**

|   |             |             |             |
|---|-------------|-------------|-------------|
| C | -2.45045100 | 4.50093900  | 1.34852900  |
| H | -1.83635600 | 4.61724100  | 2.24690500  |
| H | -1.96968700 | 5.06498300  | 0.54256200  |
| H | -3.41924100 | 4.96693400  | 1.54745700  |
| C | -2.61051200 | 3.02425200  | 0.97802000  |
| H | -3.25666600 | 2.93511700  | 0.09626400  |
| H | -3.11878400 | 2.49330500  | 1.78894900  |
| C | -1.27172000 | 2.33283300  | 0.69192600  |
| H | -0.75684400 | 2.86435100  | -0.12611600 |
| H | -0.61280500 | 2.42682900  | 1.56457700  |
| C | -1.38771800 | 0.87574800  | 0.30910700  |
| H | -2.20536000 | 0.66151900  | -0.38730200 |
| H | -1.88312000 | 0.28887300  | 1.42241900  |
| C | -0.10960500 | 0.13108000  | -0.00166500 |
| H | 0.58148000  | 0.22219000  | 0.84704900  |
| H | 0.39298700  | 0.64374800  | -0.83843200 |
| C | -0.30398100 | -1.34648600 | -0.36427100 |
| H | -0.97386000 | -1.41819900 | -1.23043300 |
| H | -0.81795600 | -1.85592100 | 0.45925800  |
| C | 1.00846700  | -2.07272600 | -0.67787900 |
| H | 1.67981100  | -2.00013500 | 0.18814600  |
| H | 1.52146300  | -1.55855500 | -1.50131500 |
| C | 0.82037900  | -3.54879600 | -1.04592100 |
| H | 0.15199800  | -3.62159900 | -1.91247900 |

|   |             |             |             |
|---|-------------|-------------|-------------|
| H | 0.30766700  | -4.06286200 | -0.22390600 |
| C | 2.13643400  | -4.26777500 | -1.35582300 |
| H | 2.81309600  | -4.24396200 | -0.49564100 |
| H | 1.96719100  | -5.31645200 | -1.61521800 |
| H | 2.65581000  | -3.79757600 | -2.19690400 |
| O | -2.27157300 | -0.19639800 | 2.43959700  |
| O | -1.32724500 | 0.19641300  | 3.42073200  |
| H | -0.77976500 | -0.59684900 | 3.51673900  |

**HO<sub>2</sub>-R25: HO<sub>2</sub> + CH<sub>3</sub>(CH<sub>2</sub>)<sub>7</sub>CH<sub>3</sub> → H<sub>2</sub>O<sub>2</sub> + CH<sub>3</sub>(CH<sub>2</sub>)<sub>3</sub>CH(CH<sub>2</sub>)<sub>3</sub>CH<sub>3</sub>**

**TS25: HO<sub>2</sub> + CH<sub>3</sub>(CH<sub>2</sub>)<sub>7</sub>CH<sub>3</sub> → H<sub>2</sub>O<sub>2</sub> + CH<sub>3</sub>(CH<sub>2</sub>)<sub>3</sub>CH(CH<sub>2</sub>)<sub>3</sub>CH<sub>3</sub>**

|   |             |             |             |
|---|-------------|-------------|-------------|
| C | -2.28978000 | 4.57437700  | 1.19920800  |
| H | -1.40105000 | 4.90730100  | 1.74443900  |
| H | -2.21927400 | 4.97037200  | 0.18125300  |
| H | -3.16178300 | 5.03259900  | 1.67382500  |
| C | -2.39497500 | 3.04663900  | 1.19208500  |
| H | -3.31122900 | 2.74608500  | 0.66924100  |
| H | -2.50092200 | 2.68325500  | 2.22172300  |
| C | -1.19051200 | 2.36215600  | 0.53633500  |
| H | -1.08395500 | 2.72667900  | -0.49330600 |
| H | -0.27282800 | 2.65670600  | 1.05893600  |
| C | -1.29424600 | 0.83213300  | 0.51834900  |
| H | -2.21295600 | 0.54047600  | -0.01704600 |
| H | -1.42477700 | 0.45186900  | 1.54038300  |
| C | -0.12480000 | 0.13164200  | -0.13447500 |
| H | 0.94467300  | 0.41303000  | 0.64398400  |
| H | 0.20419400  | 0.59869800  | -1.06874500 |
| C | -0.14800700 | -1.37879600 | -0.17663200 |
| H | -1.07079500 | -1.69456500 | -0.69166600 |
| H | -0.23290700 | -1.76839200 | 0.84574800  |
| C | 1.06200000  | -2.01272300 | -0.87315000 |
| H | 1.97645500  | -1.69640200 | -0.35968400 |
| H | 1.13280800  | -1.62585700 | -1.89808600 |
| C | 1.00242000  | -3.54362000 | -0.91362600 |
| H | 0.08307500  | -3.85837200 | -1.42320700 |
| H | 0.92946700  | -3.92703500 | 0.11118900  |
| C | 2.21226400  | -4.17462500 | -1.60865500 |
| H | 3.14330200  | -3.90739600 | -1.09941200 |
| H | 2.14150800  | -5.26582400 | -1.62127400 |
| H | 2.29424600  | -3.83513000 | -2.64614000 |
| O | 1.86376800  | 0.61425300  | 1.37646500  |
| O | 1.60295600  | -0.17722800 | 2.52291400  |
| H | 1.25592700  | 0.47139600  | 3.15306900  |

### 2.2.10 C10 (*n*-C<sub>10</sub>H<sub>22</sub>)

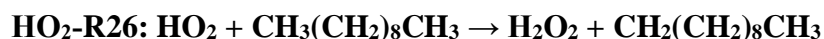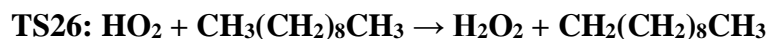

|   |             |             |             |
|---|-------------|-------------|-------------|
| C | 4.66221300  | -1.07601800 | -0.35731300 |
| H | 4.73362900  | -0.79808600 | -1.41028300 |
| H | 4.94996100  | 0.13469300  | 0.23531800  |
| H | 5.50243800  | -1.68094200 | -0.01652900 |
| C | 3.29982400  | -1.48817600 | 0.13148700  |
| H | 3.09875500  | -2.50857000 | -0.23657200 |
| H | 3.30956500  | -1.57095400 | 1.22505000  |
| C | 2.16171300  | -0.56076100 | -0.31339000 |
| H | 2.35919600  | 0.45120100  | 0.05608400  |
| H | 2.16212100  | -0.49316400 | -1.40879300 |
| C | 0.78263200  | -1.02513500 | 0.16678400  |
| H | 0.59484000  | -2.04416100 | -0.19659200 |
| H | 0.78408700  | -1.08864800 | 1.26262500  |
| C | -0.36121900 | -0.10974100 | -0.28396200 |
| H | -0.17508500 | 0.90775800  | 0.08229000  |
| H | -0.36004100 | -0.04266400 | -1.37967800 |
| C | -1.74225100 | -0.57509700 | 0.19153800  |
| H | -1.92607500 | -1.59377000 | -0.17415400 |
| H | -1.74378400 | -0.64148800 | 1.28726900  |
| C | -2.88799500 | 0.33749300  | -0.26047100 |
| H | -2.70721200 | 1.35505500  | 0.10927600  |
| H | -2.88340300 | 0.40789700  | -1.35603500 |
| C | -4.26946900 | -0.13254000 | 0.20865200  |
| H | -4.27538000 | -0.20315000 | 1.30429300  |
| H | -4.45041600 | -1.15035400 | -0.16120600 |
| C | -5.41703700 | 0.77795700  | -0.24304600 |
| H | -5.23923900 | 1.79402100  | 0.12973200  |
| H | -5.40961600 | 0.85091100  | -1.33751100 |
| C | -6.79327000 | 0.29639500  | 0.22584500  |
| H | -7.58869100 | 0.96591500  | -0.11342300 |
| H | -7.01432300 | -0.70401600 | -0.15968500 |
| H | -6.84426800 | 0.24732600  | 1.31824600  |
| O | 5.19824200  | 1.14112900  | 0.76412400  |
| O | 4.89465900  | 2.15311500  | -0.18032900 |
| H | 5.76889000  | 2.38497100  | -0.52682300 |

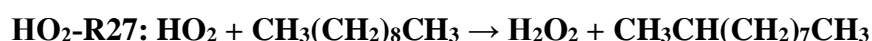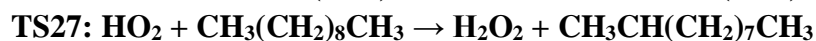

|   |             |            |            |
|---|-------------|------------|------------|
| C | -5.68173100 | 4.08286700 | 0.06616200 |
| H | -5.40614600 | 4.65147700 | 0.96582700 |

|   |             |             |             |
|---|-------------|-------------|-------------|
| H | -5.33117600 | 4.65802900  | -0.79628000 |
| H | -6.77324200 | 4.03654200  | 0.03315300  |
| C | -5.06245200 | 2.70772200  | 0.09869600  |
| H | -5.51081200 | 2.03524800  | 0.83611100  |
| H | -5.49000900 | 2.10865200  | -1.03515400 |
| C | -3.55605700 | 2.62164900  | 0.02322000  |
| H | -3.20922900 | 3.13767400  | -0.88112100 |
| H | -3.13673100 | 3.19343100  | 0.86835600  |
| C | -2.99962900 | 1.19291900  | 0.05410000  |
| H | -3.34869500 | 0.68988100  | 0.96506000  |
| H | -3.41514800 | 0.62974000  | -0.78868400 |
| C | -1.46923700 | 1.13939500  | 0.00093500  |
| H | -1.12225300 | 1.64321700  | -0.91030200 |
| H | -1.05525600 | 1.71191000  | 0.84155600  |
| C | -0.90669300 | -0.28625600 | 0.03491700  |
| H | -1.25573500 | -0.79149400 | 0.94490000  |
| H | -1.31969800 | -0.85725300 | -0.80634800 |
| C | 0.62399300  | -0.34325200 | -0.01815600 |
| H | 0.97280600  | 0.16081100  | -0.92879200 |
| H | 1.03664400  | 0.22973800  | 0.82255800  |
| C | 1.18742300  | -1.76841200 | 0.01743900  |
| H | 0.77583500  | -2.34188100 | -0.82339800 |
| H | 0.83865600  | -2.27362600 | 0.92771200  |
| C | 2.71814000  | -1.82726000 | -0.03518100 |
| H | 3.06692100  | -1.32243600 | -0.94434400 |
| H | 3.12988900  | -1.25593500 | 0.80582800  |
| C | 3.27112900  | -3.25515500 | -0.00074700 |
| H | 4.36407700  | -3.26247600 | -0.03905700 |
| H | 2.96755800  | -3.77501600 | 0.91359100  |
| H | 2.90538700  | -3.84155100 | -0.84969700 |
| O | -5.86152900 | 1.62341700  | -2.05648300 |
| O | -5.52060700 | 2.56220200  | -3.06117000 |
| H | -6.36327900 | 3.01087400  | -3.22536900 |

**HO<sub>2</sub>-R28: HO<sub>2</sub> + CH<sub>3</sub>(CH<sub>2</sub>)<sub>8</sub>CH<sub>3</sub> → H<sub>2</sub>O<sub>2</sub> + CH<sub>3</sub>CH<sub>2</sub>CH(CH<sub>2</sub>)<sub>6</sub>CH<sub>3</sub>**

**TS28: HO<sub>2</sub> + CH<sub>3</sub>(CH<sub>2</sub>)<sub>8</sub>CH<sub>3</sub> → H<sub>2</sub>O<sub>2</sub> + CH<sub>3</sub>CH<sub>2</sub>CH(CH<sub>2</sub>)<sub>6</sub>CH<sub>3</sub>**

|   |             |            |             |
|---|-------------|------------|-------------|
| C | -5.62778700 | 4.27060800 | 0.32641300  |
| H | -5.33941000 | 4.64758600 | 1.31263900  |
| H | -5.21211700 | 4.94451900 | -0.42627200 |
| H | -6.71756800 | 4.31787300 | 0.25771600  |
| C | -5.12640200 | 2.83883800 | 0.11440500  |
| H | -5.58909400 | 2.17299200 | 0.86073200  |
| H | -5.45989100 | 2.46595600 | -0.86123500 |

|   |             |             |             |
|---|-------------|-------------|-------------|
| C | -3.62604900 | 2.68786500  | 0.21822200  |
| H | -3.15711500 | 3.42832600  | -0.81247200 |
| H | -3.18117900 | 3.23856000  | 1.05398600  |
| C | -3.04561800 | 1.30714700  | 0.01678000  |
| H | -3.49956200 | 0.63062000  | 0.75973200  |
| H | -3.36355100 | 0.91637900  | -0.95903400 |
| C | -1.51883500 | 1.23336900  | 0.14064900  |
| H | -1.06324200 | 1.91276000  | -0.58930800 |
| H | -1.22108800 | 1.60666100  | 1.12856600  |
| C | -0.96067800 | -0.18069200 | -0.05571300 |
| H | -1.42069800 | -0.85728100 | 0.67623700  |
| H | -1.26030200 | -0.55518800 | -1.04330900 |
| C | 0.56453500  | -0.25997600 | 0.07240500  |
| H | 1.02453700  | 0.41591900  | -0.66002900 |
| H | 0.86400200  | 0.11469600  | 1.05969500  |
| C | 1.12461000  | -1.67353200 | -0.12254900 |
| H | 0.82383100  | -2.04991900 | -1.10912800 |
| H | 0.66668300  | -2.34942500 | 0.61156400  |
| C | 2.65014400  | -1.75430200 | 0.00235500  |
| H | 3.10809300  | -1.08001900 | -0.73156800 |
| H | 2.95143100  | -1.37934800 | 0.98802100  |
| C | 3.19923700  | -3.17051300 | -0.19438700 |
| H | 4.28855200  | -3.19408400 | -0.10136200 |
| H | 2.78763900  | -3.86123200 | 0.54845800  |
| H | 2.94209100  | -3.56000900 | -1.18458500 |
| O | -2.79170600 | 4.05490800  | -1.75787400 |
| O | -3.40351900 | 3.43134400  | -2.87410500 |
| H | -2.68334700 | 2.89516000  | -3.23756200 |

**HO<sub>2</sub>-R29: HO<sub>2</sub> + CH<sub>3</sub>(CH<sub>2</sub>)<sub>8</sub>CH<sub>3</sub> → H<sub>2</sub>O<sub>2</sub> + CH<sub>3</sub>(CH<sub>2</sub>)<sub>2</sub>CH(CH<sub>2</sub>)<sub>5</sub>CH<sub>3</sub>**

**TS29: HO<sub>2</sub> + CH<sub>3</sub>(CH<sub>2</sub>)<sub>8</sub>CH<sub>3</sub> → H<sub>2</sub>O<sub>2</sub> + CH<sub>3</sub>(CH<sub>2</sub>)<sub>2</sub>CH(CH<sub>2</sub>)<sub>5</sub>CH<sub>3</sub>**

|   |             |            |             |
|---|-------------|------------|-------------|
| C | -5.76642700 | 4.05918100 | 0.17492000  |
| H | -5.34101300 | 4.70026700 | 0.95354200  |
| H | -5.56153300 | 4.53340200 | -0.79027300 |
| H | -6.85083000 | 4.04516000 | 0.31293500  |
| C | -5.17948700 | 2.64637900 | 0.23592400  |
| H | -5.42954100 | 2.18755500 | 1.19979400  |
| H | -5.64669400 | 2.01755900 | -0.52962900 |
| C | -3.65708600 | 2.62073700 | 0.05022800  |
| H | -3.38770500 | 3.09359200 | -0.90382600 |
| H | -3.19140200 | 3.25139200 | 0.82573400  |
| C | -3.03609700 | 1.24498700 | 0.12553800  |
| H | -3.42287800 | 0.63019400 | 0.94516600  |

|   |             |             |             |
|---|-------------|-------------|-------------|
| H | -3.54147700 | 0.56113000  | -0.92576100 |
| C | -1.54112800 | 1.14203800  | -0.06941900 |
| H | -1.27559200 | 1.54848000  | -1.05353800 |
| H | -1.05181300 | 1.80308100  | 0.66539000  |
| C | -0.97800500 | -0.27722700 | 0.07471900  |
| H | -1.24189600 | -0.67045600 | 1.06490100  |
| H | -1.46376700 | -0.93127000 | -0.65748000 |
| C | 0.54193500  | -0.34310000 | -0.10794900 |
| H | 0.80251800  | 0.04494800  | -1.10087900 |
| H | 1.02534500  | 0.32541300  | 0.61684400  |
| C | 1.11600300  | -1.75576700 | 0.04850600  |
| H | 0.63336000  | -2.42464200 | -0.67561000 |
| H | 0.85537100  | -2.14507100 | 1.04144700  |
| C | 2.63603800  | -1.82540100 | -0.13587500 |
| H | 2.89612600  | -1.44073800 | -1.12948300 |
| H | 3.11813100  | -1.15398100 | 0.58534700  |
| C | 3.20146700  | -3.23944300 | 0.02788800  |
| H | 4.28627500  | -3.25543800 | -0.10983700 |
| H | 2.98739400  | -3.63759600 | 1.02486400  |
| H | 2.76380600  | -3.92728500 | -0.70252900 |
| O | -3.94235800 | -0.00557600 | -1.89519000 |
| O | -3.32700700 | 0.65302000  | -2.98895700 |
| H | -4.03449000 | 1.22949000  | -3.31364100 |

**HO<sub>2</sub>-R30: HO<sub>2</sub> + CH<sub>3</sub>(CH<sub>2</sub>)<sub>8</sub>CH<sub>3</sub> → H<sub>2</sub>O<sub>2</sub> + CH<sub>3</sub>(CH<sub>2</sub>)<sub>3</sub>CH(CH<sub>2</sub>)<sub>4</sub>CH<sub>3</sub>**

**TS30: HO<sub>2</sub> + CH<sub>3</sub>(CH<sub>2</sub>)<sub>8</sub>CH<sub>3</sub> → H<sub>2</sub>O<sub>2</sub> + CH<sub>3</sub>(CH<sub>2</sub>)<sub>3</sub>CH(CH<sub>2</sub>)<sub>4</sub>CH<sub>3</sub>**

|   |             |             |             |
|---|-------------|-------------|-------------|
| C | -5.93819800 | 4.08913100  | 0.56520100  |
| H | -5.54732600 | 4.71274400  | 1.37555600  |
| H | -5.68054400 | 4.57637400  | -0.38038500 |
| H | -7.02845000 | 4.08257600  | 0.64852900  |
| C | -5.36391000 | 2.67105800  | 0.63095200  |
| H | -5.66795600 | 2.19667100  | 1.57214200  |
| H | -5.80043700 | 2.06333500  | -0.17081700 |
| C | -3.83613400 | 2.63287500  | 0.51544000  |
| H | -3.53109200 | 3.10211600  | -0.42683700 |
| H | -3.39767100 | 3.23835300  | 1.31944600  |
| C | -3.25771700 | 1.21381600  | 0.58063800  |
| H | -3.57423900 | 0.73985500  | 1.52461300  |
| H | -3.69448500 | 0.59737000  | -0.21551000 |
| C | -1.74946200 | 1.14272900  | 0.50285200  |
| H | -1.43423800 | 1.63726800  | -0.71704100 |
| H | -1.23864000 | 1.88103200  | 1.13084600  |
| C | -1.11391800 | -0.22844000 | 0.53350500  |

|   |             |             |             |
|---|-------------|-------------|-------------|
| H | -1.42083600 | -0.72723000 | 1.46823400  |
| H | -1.53129400 | -0.84091200 | -0.27580400 |
| C | 0.41741100  | -0.22534300 | 0.44562300  |
| H | 0.72504700  | 0.27451800  | -0.47863500 |
| H | 0.82319900  | 0.37581200  | 1.26941500  |
| C | 1.02483000  | -1.63114200 | 0.49717000  |
| H | 0.62129100  | -2.23001900 | -0.32970800 |
| H | 0.70610100  | -2.13406400 | 1.42007800  |
| C | 2.55584200  | -1.63934300 | 0.42244700  |
| H | 2.87315600  | -1.13480300 | -0.49788600 |
| H | 2.96012600  | -1.04359300 | 1.25002600  |
| C | 3.15634800  | -3.04736800 | 0.46687900  |
| H | 4.24816800  | -3.01815200 | 0.41183400  |
| H | 2.88448000  | -3.56527200 | 1.39230800  |
| H | 2.79836900  | -3.65654400 | -0.36919200 |
| O | -1.20597700 | 2.03647100  | -1.81653900 |
| O | 0.04195600  | 2.70117500  | -1.73481800 |
| H | -0.21708900 | 3.63272400  | -1.67802900 |

### 2.2.11 C11 (*n*-C<sub>11</sub>H<sub>24</sub>)

**HO<sub>2</sub>-R31:** HO<sub>2</sub> + CH<sub>3</sub>(CH<sub>2</sub>)<sub>9</sub>CH<sub>3</sub> → H<sub>2</sub>O<sub>2</sub> + CH<sub>2</sub>(CH<sub>2</sub>)<sub>9</sub>CH<sub>3</sub>

**TS31:** HO<sub>2</sub> + CH<sub>3</sub>(CH<sub>2</sub>)<sub>9</sub>CH<sub>3</sub> → H<sub>2</sub>O<sub>2</sub> + CH<sub>2</sub>(CH<sub>2</sub>)<sub>9</sub>CH<sub>3</sub>

|   |             |             |             |
|---|-------------|-------------|-------------|
| C | -5.30946800 | -0.95251700 | 0.38403200  |
| H | -5.36654600 | -0.65338500 | 1.43204100  |
| H | -5.53745100 | 0.26091400  | -0.22892300 |
| H | -6.17814500 | -1.52166300 | 0.05321900  |
| C | -3.96855600 | -1.43696600 | -0.09842300 |
| H | -3.81593200 | -2.46039600 | 0.28403100  |
| H | -3.98313800 | -1.53462700 | -1.19073300 |
| C | -2.78788000 | -0.55761400 | 0.33293200  |
| H | -2.94422600 | 0.45972900  | -0.04165400 |
| H | -2.77786100 | -0.48335300 | 1.42786700  |
| C | -1.43328300 | -1.08251800 | -0.15427200 |
| H | -1.44499800 | -1.14919500 | -1.24985800 |
| H | -1.28600000 | -2.10746400 | 0.21120200  |
| C | -0.24894500 | -0.21450600 | 0.28551500  |
| H | -0.23454400 | -0.15128300 | 1.38135400  |
| H | -0.39988800 | 0.81080200  | -0.07525100 |
| C | 1.10727500  | -0.73058700 | -0.20845400 |
| H | 1.09336400  | -0.79059300 | -1.30446800 |
| H | 1.25618500  | -1.75770600 | 0.14952700  |
| C | 2.29233500  | 0.13493400  | 0.23457900  |
| H | 2.30706500  | 0.19399000  | 1.33068000  |

|   |             |             |             |
|---|-------------|-------------|-------------|
| H | 2.14262300  | 1.16218500  | -0.12205800 |
| C | 3.64868000  | -0.37916300 | -0.26139700 |
| H | 3.63402900  | -0.43719400 | -1.35756100 |
| H | 3.79794500  | -1.40696600 | 0.09438800  |
| C | 4.83410100  | 0.48524700  | 0.18215100  |
| H | 4.85047000  | 0.54294400  | 1.27847500  |
| H | 4.68555700  | 1.51353400  | -0.17269100 |
| C | 6.19081900  | -0.02711600 | -0.31472500 |
| H | 6.17518600  | -0.08407100 | -1.41002700 |
| H | 6.34022600  | -1.05424700 | 0.04014800  |
| C | 7.36871700  | 0.84306200  | 0.13345000  |
| H | 7.43330000  | 0.88952700  | 1.22525200  |
| H | 8.31986900  | 0.45185500  | -0.23851000 |
| H | 7.26519000  | 1.86888900  | -0.23432400 |
| O | -5.74150200 | 1.26904900  | -0.77246400 |
| O | -5.41047000 | 2.28023200  | 0.16364800  |
| H | -6.27926900 | 2.54999300  | 0.49608500  |

**HO<sub>2</sub>-R32: HO<sub>2</sub> + CH<sub>3</sub>(CH<sub>2</sub>)<sub>9</sub>CH<sub>3</sub> → H<sub>2</sub>O<sub>2</sub> + CH<sub>3</sub>CH(CH<sub>2</sub>)<sub>8</sub>CH<sub>3</sub>**

**TS32: HO<sub>2</sub> + CH<sub>3</sub>(CH<sub>2</sub>)<sub>9</sub>CH<sub>3</sub> → H<sub>2</sub>O<sub>2</sub> + CH<sub>3</sub>CH(CH<sub>2</sub>)<sub>8</sub>CH<sub>3</sub>**

|   |             |             |             |
|---|-------------|-------------|-------------|
| C | -5.47136500 | 3.26514600  | -0.02785900 |
| H | -5.20484800 | 3.85067500  | 0.86363700  |
| H | -5.11865200 | 3.82744400  | -0.89786900 |
| H | -6.56236500 | 3.21178200  | -0.06692500 |
| C | -4.84431200 | 1.89444600  | 0.03229100  |
| H | -5.29312900 | 1.23244800  | 0.77885600  |
| H | -5.26163000 | 1.27303400  | -1.09345200 |
| C | -3.33700600 | 1.81600600  | -0.03301200 |
| H | -2.98803600 | 2.31585100  | -0.94556200 |
| H | -2.92583900 | 2.40709100  | 0.80279500  |
| C | -2.77227600 | 0.39161500  | 0.03003000  |
| H | -3.18240300 | -0.19227900 | -0.80122800 |
| H | -3.12049500 | -0.09344200 | 0.95099500  |
| C | -1.24141200 | 0.34612000  | -0.01843400 |
| H | -0.83280200 | 0.94287100  | 0.80784000  |
| H | -0.89542100 | 0.82803200  | -0.94178200 |
| C | -0.67024500 | -1.07461600 | 0.05448900  |
| H | -1.07862700 | -1.67062600 | -0.77155400 |
| H | -1.01754500 | -1.55710000 | 0.97738700  |
| C | 0.86087300  | -1.12360200 | 0.00514000  |
| H | 1.26874100  | -0.52273200 | 0.82850700  |
| H | 1.20798600  | -0.64548400 | -0.91995600 |
| C | 1.43294000  | -2.54372600 | 0.08553400  |



|   |             |             |             |
|---|-------------|-------------|-------------|
| H | 1.02532300  | -3.14483100 | -0.73757400 |
| H | 1.08525500  | -3.02162100 | 1.01068300  |
| C | 2.96390700  | -2.59366700 | 0.03692300  |
| H | 3.37235300  | -1.99003400 | 0.85814700  |
| H | 3.31266600  | -2.11943500 | -0.88979700 |
| C | 3.53710600  | -4.01306200 | 0.12287500  |
| H | 3.13054400  | -4.61627900 | -0.69805500 |
| H | 3.18831200  | -4.48676700 | 1.04867600  |
| C | 5.06732000  | -4.05276600 | 0.07523200  |
| H | 5.50341700  | -3.48700300 | 0.90477200  |
| H | 5.44349400  | -5.07770300 | 0.13867200  |
| H | 5.44535800  | -3.61728300 | -0.85520700 |
| O | -5.62351200 | 0.76784400  | -2.10831700 |
| O | -5.27922700 | 1.68998100  | -3.12722700 |
| H | -6.12258400 | 2.13199300  | -3.30536000 |

**HO<sub>2</sub>-R33: HO<sub>2</sub> + CH<sub>3</sub>(CH<sub>2</sub>)<sub>9</sub>CH<sub>3</sub> → H<sub>2</sub>O<sub>2</sub> + H<sub>2</sub>+CH<sub>3</sub>CH<sub>2</sub>CH(CH<sub>2</sub>)<sub>7</sub>CH<sub>3</sub>**

**TS33: HO<sub>2</sub> + CH<sub>3</sub>(CH<sub>2</sub>)<sub>9</sub>CH<sub>3</sub> → H<sub>2</sub>O<sub>2</sub> + H<sub>2</sub>+CH<sub>3</sub>CH<sub>2</sub>CH(CH<sub>2</sub>)<sub>7</sub>CH<sub>3</sub>**

|   |             |             |             |
|---|-------------|-------------|-------------|
| C | -5.47266800 | 3.37699100  | 0.07576400  |
| H | -5.13634800 | 3.88988000  | 0.98228000  |
| H | -5.11946000 | 3.94907800  | -0.78590700 |
| H | -6.56540800 | 3.39842700  | 0.06834300  |
| C | -4.94989900 | 1.93759600  | 0.03070700  |
| H | -5.36151700 | 1.37427000  | 0.88346600  |
| H | -5.32766300 | 1.42889000  | -0.86430200 |
| C | -3.44314700 | 1.82055300  | 0.07755700  |
| H | -3.00597800 | 2.43724500  | -1.04563000 |
| H | -2.97370200 | 2.46659500  | 0.82788000  |
| C | -2.84759200 | 0.43280200  | 0.00818800  |
| H | -3.20935400 | -0.07397900 | -0.89543800 |
| H | -3.24557800 | -0.15296400 | 0.85392100  |
| C | -1.31493800 | 0.39376400  | 0.04749000  |
| H | -0.96678700 | 0.89225100  | 0.96124800  |
| H | -0.91762800 | 0.97705500  | -0.78948500 |
| C | -0.74742900 | -1.02909100 | -0.00156700 |
| H | -1.09130100 | -1.52355100 | -0.91924500 |
| H | -1.15755000 | -1.61535900 | 0.83153000  |
| C | 0.78346100  | -1.07686500 | 0.05297100  |
| H | 1.12773900  | -0.58787000 | 0.97353800  |
| H | 1.19186700  | -0.48466000 | -0.77570200 |
| C | 1.35617200  | -2.49754200 | -0.00961000 |
| H | 1.01200400  | -2.98551100 | -0.93073900 |
| H | 0.94657300  | -3.09040200 | 0.81876000  |

|   |             |             |             |
|---|-------------|-------------|-------------|
| C | 2.88700500  | -2.54556100 | 0.04440500  |
| H | 3.23254100  | -2.06015900 | 0.96660000  |
| H | 3.29699300  | -1.95096500 | -0.78243100 |
| C | 3.46187500  | -3.96522800 | -0.02335900 |
| H | 3.11636700  | -4.44997400 | -0.94463200 |
| H | 3.05365900  | -4.55951000 | 0.80336100  |
| C | 4.99200000  | -4.00246700 | 0.02916900  |
| H | 5.36675200  | -3.55518400 | 0.95536100  |
| H | 5.36973700  | -5.02758100 | -0.02086300 |
| H | 5.42962500  | -3.44609700 | -0.80583300 |
| O | -2.67296500 | 2.95515700  | -2.06565200 |
| O | -1.41548300 | 3.55167600  | -1.80270400 |
| H | -1.64766100 | 4.48089500  | -1.65868200 |

**HO<sub>2</sub>-R34: HO<sub>2</sub> + CH<sub>3</sub>(CH<sub>2</sub>)<sub>9</sub>CH<sub>3</sub> → H<sub>2</sub>O<sub>2</sub> + CH<sub>3</sub>(CH<sub>2</sub>)<sub>2</sub>CH(CH<sub>2</sub>)<sub>6</sub>CH<sub>3</sub>**

**TS34: HO<sub>2</sub> + CH<sub>3</sub>(CH<sub>2</sub>)<sub>9</sub>CH<sub>3</sub> → H<sub>2</sub>O<sub>2</sub> + CH<sub>3</sub>(CH<sub>2</sub>)<sub>2</sub>CH(CH<sub>2</sub>)<sub>6</sub>CH<sub>3</sub>**

|   |             |             |             |
|---|-------------|-------------|-------------|
| C | -5.51389100 | 3.15036400  | 0.15354300  |
| H | -5.15458200 | 3.73535300  | 1.00615400  |
| H | -5.22140600 | 3.68252600  | -0.75737400 |
| H | -6.60630400 | 3.14083900  | 0.19481300  |
| C | -4.94367500 | 1.72951700  | 0.17410200  |
| H | -5.27919600 | 1.21337900  | 1.08133800  |
| H | -5.34660800 | 1.15621800  | -0.66772200 |
| C | -3.41117000 | 1.69766200  | 0.11885300  |
| H | -3.05723700 | 2.22834200  | -0.77525900 |
| H | -3.01052300 | 2.27108700  | 0.97129600  |
| C | -2.80769500 | 0.31258600  | 0.15631100  |
| H | -3.22652300 | -0.29669800 | -0.97594100 |
| H | -3.26648900 | -0.34922900 | 0.89854000  |
| C | -1.30235000 | 0.20426500  | 0.08109400  |
| H | -0.87257300 | 0.80812200  | 0.89781700  |
| H | -0.95174600 | 0.67295500  | -0.84718300 |
| C | -0.76305000 | -1.22841900 | 0.17466500  |
| H | -1.19289500 | -1.82645500 | -0.63613200 |
| H | -1.10882100 | -1.68283600 | 1.11205600  |
| C | 0.76607600  | -1.30160600 | 0.11041500  |
| H | 1.19427100  | -0.68656200 | 0.91306600  |
| H | 1.10881200  | -0.85458100 | -0.83143900 |
| C | 1.31502300  | -2.72871900 | 0.22148200  |
| H | 0.88609400  | -3.34394000 | -0.57970300 |
| H | 0.97222500  | -3.17552500 | 1.16386300  |
| C | 2.84410100  | -2.80494500 | 0.15433500  |
| H | 3.27351800  | -2.18274000 | 0.95069600  |

|   |             |             |             |
|---|-------------|-------------|-------------|
| H | 3.18746900  | -2.36597800 | -0.79150700 |
| C | 3.39557300  | -4.23021000 | 0.27765700  |
| H | 2.96689000  | -4.85256900 | -0.51725000 |
| H | 3.05321300  | -4.66799100 | 1.22336900  |
| C | 4.92399900  | -4.29705400 | 0.20910000  |
| H | 5.38186400  | -3.71085900 | 1.01232900  |
| H | 5.28411400  | -5.32549100 | 0.30226400  |
| H | 5.29515800  | -3.90027800 | -0.74118300 |
| O | -3.54911300 | -0.79637100 | -2.00945000 |
| O | -2.82765600 | -0.08884200 | -3.00312400 |
| H | -3.49325300 | 0.52174900  | -3.35304600 |

**HO<sub>2</sub>-R35: HO<sub>2</sub> + CH<sub>3</sub>(CH<sub>2</sub>)<sub>9</sub>CH<sub>3</sub> → H<sub>2</sub>O<sub>2</sub> + CH<sub>3</sub>(CH<sub>2</sub>)<sub>3</sub>CH(CH<sub>2</sub>)<sub>5</sub>CH<sub>3</sub>**

**TS35: HO<sub>2</sub> + CH<sub>3</sub>(CH<sub>2</sub>)<sub>9</sub>CH<sub>3</sub> → H<sub>2</sub>O<sub>2</sub> + CH<sub>3</sub>(CH<sub>2</sub>)<sub>3</sub>CH(CH<sub>2</sub>)<sub>5</sub>CH<sub>3</sub>**

|   |             |             |             |
|---|-------------|-------------|-------------|
| C | -5.44351400 | 3.30950200  | 0.18825100  |
| H | -5.12239100 | 3.79246400  | 1.11670100  |
| H | -5.06537700 | 3.91054700  | -0.64467700 |
| H | -6.53580600 | 3.34748100  | 0.15546600  |
| C | -4.93095800 | 1.86856500  | 0.10797700  |
| H | -5.35674300 | 1.28294000  | 0.93205100  |
| H | -5.29466100 | 1.40275900  | -0.81579300 |
| C | -3.40240700 | 1.76890800  | 0.15342500  |
| H | -2.97561600 | 2.34988300  | -0.67220700 |
| H | -3.03780900 | 2.23236100  | 1.07940800  |
| C | -2.88491400 | 0.32725100  | 0.07402700  |
| H | -3.24493100 | -0.14707200 | -0.84794400 |
| H | -3.32746300 | -0.25932900 | 0.89630500  |
| C | -1.38169900 | 0.19087300  | 0.15738500  |
| H | -0.92277200 | 0.81675500  | 0.93076700  |
| H | -0.90544700 | 0.81973100  | -0.94226800 |
| C | -0.80173300 | -1.20337400 | 0.07787800  |
| H | -1.14904600 | -1.69032500 | -0.84217500 |
| H | -1.22584900 | -1.79829500 | 0.90424600  |
| C | 0.72899600  | -1.26179900 | 0.15064500  |
| H | 1.06228600  | -0.78802600 | 1.08287900  |
| H | 1.15160400  | -0.66470600 | -0.66390100 |
| C | 1.28140500  | -2.68985900 | 0.08131600  |
| H | 0.95267600  | -3.15883700 | -0.85511800 |
| H | 0.84604900  | -3.29039300 | 0.89116100  |
| C | 2.80980600  | -2.75725000 | 0.16850200  |
| H | 3.13979100  | -2.29628600 | 1.10872800  |
| H | 3.24430700  | -2.14958000 | -0.63555500 |
| C | 3.36884400  | -4.18225400 | 0.08249300  |

|   |             |             |             |
|---|-------------|-------------|-------------|
| H | 3.04107200  | -4.64109500 | -0.85829400 |
| H | 2.93287300  | -4.79039900 | 0.88469800  |
| C | 4.89655000  | -4.23974600 | 0.17237100  |
| H | 5.25306900  | -3.81985400 | 1.11836900  |
| H | 5.26305400  | -5.26804400 | 0.10662400  |
| H | 5.36161900  | -3.66882100 | -0.63751200 |
| O | -0.53956600 | 1.36104400  | -1.93900700 |
| O | 0.71184000  | 1.94412700  | -1.62402200 |
| H | 0.47968200  | 2.87040700  | -1.46216400 |

**HO<sub>2</sub>-R36: HO<sub>2</sub> + CH<sub>3</sub>(CH<sub>2</sub>)<sub>9</sub>CH<sub>3</sub> → H<sub>2</sub>O<sub>2</sub> + CH<sub>3</sub>(CH<sub>2</sub>)<sub>4</sub>CH(CH<sub>2</sub>)<sub>4</sub>CH<sub>3</sub>**

**TS36: HO<sub>2</sub> + CH<sub>3</sub>(CH<sub>2</sub>)<sub>9</sub>CH<sub>3</sub> → H<sub>2</sub>O<sub>2</sub> + CH<sub>3</sub>(CH<sub>2</sub>)<sub>4</sub>CH(CH<sub>2</sub>)<sub>4</sub>CH<sub>3</sub>**

|   |             |             |             |
|---|-------------|-------------|-------------|
| C | -5.50183200 | 3.17234000  | 0.11174700  |
| H | -5.15227400 | 3.74853300  | 0.97437000  |
| H | -5.18668600 | 3.70608600  | -0.79056600 |
| H | -6.59509000 | 3.17413500  | 0.13296600  |
| C | -4.94388300 | 1.74630300  | 0.13520400  |
| H | -5.30463500 | 1.22742300  | 1.03155300  |
| H | -5.33943100 | 1.18470300  | -0.71974700 |
| C | -3.41230400 | 1.69497900  | 0.10642000  |
| H | -3.05147600 | 2.21597300  | -0.79032200 |
| H | -3.01676400 | 2.25781700  | 0.96215700  |
| C | -2.84559100 | 0.27113100  | 0.12880800  |
| H | -3.23688000 | -0.29347000 | -0.72550400 |
| H | -3.20492300 | -0.24824700 | 1.02613800  |
| C | -1.31280800 | 0.22727600  | 0.10515700  |
| H | -0.92435700 | 0.78990500  | 0.97017000  |
| H | -0.93498700 | 0.76115800  | -0.77707800 |
| C | -0.72239400 | -1.16360700 | 0.14406100  |
| H | -1.11565300 | -1.75624800 | -1.00612800 |
| H | -1.20705800 | -1.82973200 | 0.86566700  |
| C | 0.78353700  | -1.28402200 | 0.10979400  |
| H | 1.19488300  | -0.69473400 | 0.94640000  |
| H | 1.16402300  | -0.80603600 | -0.80182700 |
| C | 1.30827500  | -2.72239400 | 0.19884000  |
| H | 0.89488800  | -3.30609200 | -0.63073500 |
| H | 0.93408700  | -3.18591700 | 1.12076900  |
| C | 2.83768500  | -2.80868900 | 0.17358300  |
| H | 3.25104200  | -2.21123100 | 0.99725300  |
| H | 3.20998400  | -2.35012600 | -0.75154400 |
| C | 3.37172500  | -4.24217100 | 0.27480500  |
| H | 2.95900400  | -4.83854100 | -0.54762600 |
| H | 2.99961900  | -4.70089800 | 1.19914800  |

|   |             |             |             |
|---|-------------|-------------|-------------|
| C | 4.90072800  | -4.32189000 | 0.24622200  |
| H | 5.34185800  | -3.76138000 | 1.07673600  |
| H | 5.24846100  | -5.35593700 | 0.32215200  |
| H | 5.30128600  | -3.90458100 | -0.68304100 |
| O | -1.41322900 | -2.24432000 | -2.05259500 |
| O | -0.65220400 | -1.54027000 | -3.01871700 |
| H | -1.29759300 | -0.91640200 | -3.38277400 |

## 2.2.12 C12 (*n*-C<sub>12</sub>H<sub>26</sub>)

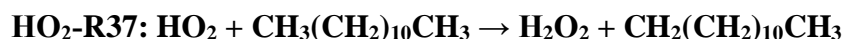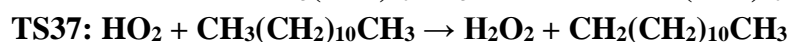

|   |             |             |             |
|---|-------------|-------------|-------------|
| C | 5.93935900  | -0.93323700 | -0.34549800 |
| H | 6.00514300  | -0.64137100 | -1.39504700 |
| H | 6.15133000  | 0.28659200  | 0.26044100  |
| H | 6.80882300  | -1.49319900 | -0.00135400 |
| C | 4.59713100  | -1.42433300 | 0.12651000  |
| H | 4.45598700  | -2.45154000 | -0.25017700 |
| H | 4.60108000  | -1.51409800 | 1.21959300  |
| C | 3.41472700  | -0.55664200 | -0.32333200 |
| H | 3.56040800  | 0.46455900  | 0.04500500  |
| H | 3.41516700  | -0.49075000 | -1.41883300 |
| C | 2.05883400  | -1.08697300 | 0.15425900  |
| H | 1.92177800  | -2.11550700 | -0.20508600 |
| H | 2.05997900  | -1.14550000 | 1.25036700  |
| C | 0.87355200  | -0.22979700 | -0.30386700 |
| H | 1.01442600  | 0.79900700  | 0.05100200  |
| H | 0.87004000  | -0.17449000 | -1.40021800 |
| C | -0.48452300 | -0.75074100 | 0.17975700  |
| H | -0.48161100 | -0.80313300 | 1.27623800  |
| H | -0.62366600 | -1.78116100 | -0.17264600 |
| C | -1.66993000 | 0.10469400  | -0.28157500 |
| H | -1.67313400 | 0.15664200  | -1.37813500 |
| H | -1.53007200 | 1.13510300  | 0.06997800  |
| C | -3.02854200 | -0.41422800 | 0.20292600  |
| H | -3.02548400 | -0.46563200 | 1.29947900  |
| H | -3.16819700 | -1.44494600 | -0.14823600 |
| C | -4.21387800 | 0.44107800  | -0.25895300 |
| H | -4.21676900 | 0.49276000  | -1.35555500 |
| H | -4.07434700 | 1.47169100  | 0.09240700  |
| C | -5.57260900 | -0.07752100 | 0.22496800  |
| H | -5.57094600 | -0.12915400 | 1.32168000  |
| H | -5.71318100 | -1.10828100 | -0.12621800 |
| C | -6.75877900 | 0.77682100  | -0.23659200 |

|   |             |             |             |
|---|-------------|-------------|-------------|
| H | -6.76060300 | 0.82876700  | -1.33226600 |
| H | -6.62016600 | 1.80633000  | 0.11546800  |
| C | -8.11170900 | 0.24941900  | 0.25034200  |
| H | -8.15431100 | 0.21913600  | 1.34378000  |
| H | -8.93544400 | 0.87980700  | -0.09626500 |
| H | -8.29466300 | -0.76626400 | -0.11477100 |
| O | 6.33846000  | 1.30064300  | 0.79904700  |
| O | 6.01521300  | 2.30164200  | -0.15066000 |
| H | 6.88725300  | 2.57509700  | -0.47139500 |

**HO<sub>2</sub>-R38: HO<sub>2</sub> + CH<sub>3</sub>(CH<sub>2</sub>)<sub>10</sub>CH<sub>3</sub> → H<sub>2</sub>O<sub>2</sub> + CH<sub>3</sub>CH(CH<sub>2</sub>)<sub>9</sub>CH<sub>3</sub>**

**TS38: HO<sub>2</sub> + CH<sub>3</sub>(CH<sub>2</sub>)<sub>10</sub>CH<sub>3</sub> → H<sub>2</sub>O<sub>2</sub> + CH<sub>3</sub>CH(CH<sub>2</sub>)<sub>9</sub>CH<sub>3</sub>**

|   |             |             |             |
|---|-------------|-------------|-------------|
| C | -6.18426800 | 3.27763300  | -0.20620700 |
| H | -5.72038200 | 3.92553400  | 0.54338500  |
| H | -6.08787200 | 3.78439500  | -1.17701800 |
| H | -7.25065300 | 3.20266100  | 0.01949500  |
| C | -5.52190000 | 1.92227700  | -0.25167000 |
| H | -5.74518600 | 1.38604300  | 0.96884200  |
| H | -6.05374600 | 1.18779300  | -0.86470600 |
| C | -4.02080700 | 1.88731300  | -0.42412100 |
| H | -3.77282200 | 2.40673600  | -1.36542900 |
| H | -3.55080900 | 2.48130700  | 0.37015300  |
| C | -3.41426800 | 0.47922900  | -0.45086000 |
| H | -3.66605200 | -0.03978000 | 0.47993100  |
| H | -3.88160900 | -0.09746800 | -1.25942300 |
| C | -1.89386100 | 0.48183600  | -0.64396600 |
| H | -1.64422000 | 1.01619500  | -1.57033200 |
| H | -1.42788700 | 1.05158300  | 0.17037200  |
| C | -1.28206400 | -0.92251100 | -0.69117500 |
| H | -1.74469100 | -1.49116900 | -1.50835300 |
| H | -1.53661000 | -1.45766000 | 0.23247100  |
| C | 0.23999700  | -0.92322600 | -0.87413200 |
| H | 0.70230900  | -0.35651700 | -0.05550500 |
| H | 0.49415000  | -0.38496100 | -1.79671500 |
| C | 0.85216400  | -2.32742100 | -0.92466100 |
| H | 0.38941700  | -2.89444600 | -1.74290500 |
| H | 0.59833700  | -2.86536100 | -0.00206700 |
| C | 2.37428400  | -2.32881500 | -1.10780400 |
| H | 2.83718100  | -1.76205100 | -0.28947400 |
| H | 2.62798100  | -1.79049900 | -2.03043700 |
| C | 2.98650700  | -3.73279500 | -1.15878600 |
| H | 2.52292700  | -4.30091300 | -1.97601200 |
| H | 2.73524300  | -4.27125100 | -0.23549600 |

|   |             |             |             |
|---|-------------|-------------|-------------|
| C | 4.50826000  | -3.73563100 | -1.34489000 |
| H | 4.97226200  | -3.16870700 | -0.52852100 |
| H | 4.75943800  | -3.19855200 | -2.26783000 |
| C | 5.11070100  | -5.14266600 | -1.39476900 |
| H | 4.69147600  | -5.72345200 | -2.22259000 |
| H | 6.19551900  | -5.10893600 | -1.52941000 |
| H | 4.90805300  | -5.69295000 | -0.47040500 |
| O | -5.95260500 | 0.97641900  | 2.06734000  |
| O | -6.05581600 | -0.43047400 | 1.94261300  |
| H | -7.01381900 | -0.57308400 | 1.94109400  |

**HO<sub>2</sub>-R39: HO<sub>2</sub> + CH<sub>3</sub>(CH<sub>2</sub>)<sub>10</sub>CH<sub>3</sub> → H<sub>2</sub>O<sub>2</sub> + H<sub>2</sub>+CH<sub>3</sub>CH<sub>2</sub>CH(CH<sub>2</sub>)<sub>8</sub>CH<sub>3</sub>**

**TS39: HO<sub>2</sub> + CH<sub>3</sub>(CH<sub>2</sub>)<sub>10</sub>CH<sub>3</sub> → H<sub>2</sub>O<sub>2</sub> + H<sub>2</sub>+CH<sub>3</sub>CH<sub>2</sub>CH(CH<sub>2</sub>)<sub>8</sub>CH<sub>3</sub>**

|   |             |             |             |
|---|-------------|-------------|-------------|
| C | -6.36580400 | 3.11379600  | -0.57155400 |
| H | -5.78740300 | 3.82749200  | 0.02117200  |
| H | -6.30009000 | 3.42423800  | -1.61861700 |
| H | -7.41286300 | 3.19080400  | -0.26733600 |
| C | -5.84023500 | 1.68653900  | -0.38691300 |
| H | -5.96757900 | 1.36658300  | 0.65493300  |
| H | -6.45733100 | 0.99248000  | -0.97950500 |
| C | -4.39731400 | 1.49913000  | -0.79540500 |
| H | -4.14055300 | 1.98396300  | -1.74333600 |
| H | -3.68225400 | 2.27381100  | 0.05227200  |
| C | -3.79278600 | 0.12496200  | -0.62181300 |
| H | -3.88133100 | -0.17948800 | 0.42879300  |
| H | -4.40405500 | -0.59504900 | -1.19141200 |
| C | -2.33115500 | 0.01405000  | -1.07142400 |
| H | -2.25514400 | 0.30733500  | -2.12646600 |
| H | -1.72860900 | 0.73329300  | -0.50635300 |
| C | -1.75033100 | -1.39308300 | -0.89275100 |
| H | -2.35925500 | -2.11358800 | -1.45484700 |
| H | -1.83061000 | -1.68445400 | 0.16234900  |
| C | -0.28885100 | -1.51119000 | -1.33812900 |
| H | 0.31820700  | -0.79018000 | -0.77605000 |
| H | -0.20718700 | -1.21917100 | -2.39327100 |
| C | 0.29673000  | -2.91638600 | -1.15609900 |
| H | -0.30937000 | -3.63742700 | -1.72008800 |
| H | 0.21231600  | -3.20889500 | -0.10141600 |
| C | 1.76004500  | -3.03353400 | -1.59626600 |
| H | 2.36526800  | -2.31168500 | -1.03270000 |
| H | 1.84493000  | -2.74168100 | -2.65119300 |
| C | 2.34756300  | -4.43742700 | -1.41200000 |
| H | 1.74488100  | -5.16009900 | -1.97779300 |

|   |             |             |             |
|---|-------------|-------------|-------------|
| H | 2.26070400  | -4.73091400 | -0.35756900 |
| C | 3.81247900  | -4.55435600 | -1.84715100 |
| H | 4.41491400  | -3.83320300 | -1.28139600 |
| H | 3.90026700  | -4.26203700 | -2.90079400 |
| C | 4.39035700  | -5.96020700 | -1.65852000 |
| H | 3.82929400  | -6.69972600 | -2.23884700 |
| H | 5.43476700  | -6.01026100 | -1.97909800 |
| H | 4.35061500  | -6.26659100 | -0.60835000 |
| O | -3.06408300 | 2.91100700  | 0.84780300  |
| O | -3.22272600 | 2.22282400  | 2.07648600  |
| H | -3.90056600 | 2.74809900  | 2.52690900  |

**HO<sub>2</sub>-R40: HO<sub>2</sub> + CH<sub>3</sub>(CH<sub>2</sub>)<sub>10</sub>CH<sub>3</sub> → H<sub>2</sub>O<sub>2</sub> + CH<sub>3</sub>(CH<sub>2</sub>)<sub>2</sub>CH(CH<sub>2</sub>)<sub>7</sub>CH<sub>3</sub>**

**TS40: HO<sub>2</sub> + CH<sub>3</sub>(CH<sub>2</sub>)<sub>10</sub>CH<sub>3</sub> → H<sub>2</sub>O<sub>2</sub> + CH<sub>3</sub>(CH<sub>2</sub>)<sub>2</sub>CH(CH<sub>2</sub>)<sub>7</sub>CH<sub>3</sub>**

|   |             |             |             |
|---|-------------|-------------|-------------|
| C | -7.19976400 | 2.61065400  | -0.14348100 |
| H | -6.65815800 | 3.18798100  | 0.61220300  |
| H | -7.13905100 | 3.16100600  | -1.08804900 |
| H | -8.25094100 | 2.57869500  | 0.15533300  |
| C | -6.61872300 | 1.20100800  | -0.28167100 |
| H | -6.71347600 | 0.66767100  | 0.66925700  |
| H | -7.20386800 | 0.63337800  | -1.01535100 |
| C | -5.14509600 | 1.20270100  | -0.70752800 |
| H | -5.04597200 | 1.73657300  | -1.66754900 |
| H | -4.55230200 | 1.78038100  | 0.01314200  |
| C | -4.53722600 | -0.17175200 | -0.86672400 |
| H | -4.56563000 | -0.68251000 | 0.38516700  |
| H | -5.18931100 | -0.89181800 | -1.37247600 |
| C | -3.09081200 | -0.25049700 | -1.29798400 |
| H | -2.99028200 | 0.27104100  | -2.26416300 |
| H | -2.46912700 | 0.32246200  | -0.59703500 |
| C | -2.54459500 | -1.67629000 | -1.44137000 |
| H | -3.16434100 | -2.22689100 | -2.16025600 |
| H | -2.65073500 | -2.20203000 | -0.48529500 |
| C | -1.08096300 | -1.72267600 | -1.89438100 |
| H | -0.46125400 | -1.17022100 | -1.17588200 |
| H | -0.97988200 | -1.19277400 | -2.85045500 |
| C | -0.53106600 | -3.14529800 | -2.04562400 |
| H | -1.14944400 | -3.69723900 | -2.76519000 |
| H | -0.63280400 | -3.67549100 | -1.08995600 |
| C | 0.93333300  | -3.19230900 | -2.49707300 |
| H | 1.55114500  | -2.63811500 | -1.77844500 |
| H | 1.03431500  | -2.66394600 | -3.45399600 |
| C | 1.48537700  | -4.61427400 | -2.64539700 |



|   |             |             |             |
|---|-------------|-------------|-------------|
| H | 0.86971300  | -5.16899500 | -3.36554900 |
| H | 1.38336500  | -5.14372700 | -1.68907000 |
| C | 2.95071800  | -4.66243900 | -3.09373700 |
| H | 3.56589000  | -4.10777700 | -2.37464000 |
| H | 3.05272000  | -4.13518400 | -4.05011800 |
| C | 3.49387000  | -6.08721400 | -3.23666100 |
| H | 2.92260400  | -6.65596100 | -3.97723300 |
| H | 4.54034100  | -6.08664500 | -3.55416400 |
| H | 3.43482900  | -6.62940100 | -2.28758000 |
| O | -4.55589200 | -1.07625100 | 1.51061900  |
| O | -3.78588800 | -0.12653500 | 2.22738400  |
| H | -2.92711900 | -0.56748100 | 2.30707900  |

**HO<sub>2</sub>-R41: HO<sub>2</sub> + CH<sub>3</sub>(CH<sub>2</sub>)<sub>10</sub>CH<sub>3</sub> → H<sub>2</sub>O<sub>2</sub> + CH<sub>3</sub>(CH<sub>2</sub>)<sub>3</sub>CH(CH<sub>2</sub>)<sub>6</sub>CH<sub>3</sub>**

**TS41: HO<sub>2</sub> + CH<sub>3</sub>(CH<sub>2</sub>)<sub>10</sub>CH<sub>3</sub> → H<sub>2</sub>O<sub>2</sub> + CH<sub>3</sub>(CH<sub>2</sub>)<sub>3</sub>CH(CH<sub>2</sub>)<sub>6</sub>CH<sub>3</sub>**

|   |             |             |             |
|---|-------------|-------------|-------------|
| C | -7.03519100 | 2.77320900  | -0.49797200 |
| H | -6.40363700 | 3.54674700  | -0.04994200 |
| H | -7.18774800 | 3.04003200  | -1.54845600 |
| H | -8.00866300 | 2.81018100  | -0.00139800 |
| C | -6.39298300 | 1.38937800  | -0.36664500 |
| H | -6.28777900 | 1.13537800  | 0.69539400  |
| H | -7.06326700 | 0.63338100  | -0.79376900 |
| C | -5.02266000 | 1.29335700  | -1.04709400 |
| H | -5.12776300 | 1.54976800  | -2.10900500 |
| H | -4.34824600 | 2.04436900  | -0.61914600 |
| C | -4.37718300 | -0.09243900 | -0.92816300 |
| H | -4.28791200 | -0.37649300 | 0.12896600  |
| H | -5.05153900 | -0.84307100 | -1.37254600 |
| C | -3.02772700 | -0.21260400 | -1.59898300 |
| H | -2.98473200 | 0.25230200  | -2.58968800 |
| H | -2.21364000 | 0.62992300  | -0.92417800 |
| C | -2.31616100 | -1.54279900 | -1.51394500 |
| H | -2.97707400 | -2.31472800 | -1.94276900 |
| H | -2.18655800 | -1.81820200 | -0.45965200 |
| C | -0.96098400 | -1.58212500 | -2.23095800 |
| H | -0.30528400 | -0.81976600 | -1.79683400 |
| H | -1.10271600 | -1.30502100 | -3.28362300 |
| C | -0.27559300 | -2.95050400 | -2.15648800 |
| H | -0.93540600 | -3.71360800 | -2.59028300 |
| H | -0.13917300 | -3.22883700 | -1.10359800 |
| C | 1.08121700  | -2.99091200 | -2.86877600 |
| H | 1.73992700  | -2.22972600 | -2.43164900 |
| H | 0.94599200  | -2.70676200 | -3.92064500 |

|   |             |             |             |
|---|-------------|-------------|-------------|
| C | 1.77235700  | -4.35699200 | -2.80084400 |
| H | 1.11460300  | -5.11904700 | -3.23941600 |
| H | 1.90787200  | -4.64268400 | -1.74943400 |
| C | 3.13025600  | -4.39481200 | -3.51140400 |
| H | 3.78700900  | -3.63353500 | -3.07308600 |
| H | 2.99515700  | -4.10976700 | -4.56204900 |
| C | 3.81568600  | -5.76235800 | -3.43901900 |
| H | 3.19784200  | -6.53958900 | -3.90014200 |
| H | 4.77936400  | -5.75472800 | -3.95610500 |
| H | 3.99844800  | -6.05906900 | -2.40129600 |
| O | -1.49310500 | 1.33010600  | -0.28149000 |
| O | -1.31855700 | 0.65084100  | 0.95015300  |
| H | -1.92485800 | 1.12291600  | 1.53985300  |

**HO<sub>2</sub>-R42: HO<sub>2</sub> + CH<sub>3</sub>(CH<sub>2</sub>)<sub>10</sub>CH<sub>3</sub> → H<sub>2</sub>O<sub>2</sub> + CH<sub>3</sub>(CH<sub>2</sub>)<sub>4</sub>CH(CH<sub>2</sub>)<sub>5</sub>CH<sub>3</sub>**

**TS42: HO<sub>2</sub> + CH<sub>3</sub>(CH<sub>2</sub>)<sub>10</sub>CH<sub>3</sub> → H<sub>2</sub>O<sub>2</sub> + CH<sub>3</sub>(CH<sub>2</sub>)<sub>4</sub>CH(CH<sub>2</sub>)<sub>5</sub>CH<sub>3</sub>**

|   |             |             |             |
|---|-------------|-------------|-------------|
| C | -7.25634100 | 2.57366900  | -0.24160500 |
| H | -6.66933900 | 3.27496600  | 0.35982900  |
| H | -7.35721100 | 3.00244700  | -1.24369000 |
| H | -8.25651500 | 2.51736800  | 0.19694900  |
| C | -6.58939000 | 1.19603200  | -0.29293100 |
| H | -6.53529300 | 0.77853000  | 0.71980300  |
| H | -7.21741400 | 0.50790100  | -0.87206300 |
| C | -5.18217000 | 1.22565800  | -0.89994500 |
| H | -5.23556600 | 1.64336600  | -1.91397500 |
| H | -4.55426300 | 1.91474000  | -0.32034800 |
| C | -4.50905500 | -0.15008900 | -0.95018300 |
| H | -4.44992800 | -0.56381900 | 0.06286000  |
| H | -5.13634700 | -0.83936900 | -1.53026500 |
| C | -3.10213000 | -0.11898200 | -1.55994400 |
| H | -3.16043800 | 0.29609200  | -2.57975600 |
| H | -2.46719700 | 0.57772500  | -0.99767400 |
| C | -2.42497700 | -1.46869900 | -1.63874700 |
| H | -3.08155000 | -2.27171600 | -1.99181300 |
| H | -2.26965400 | -1.86013800 | -0.35288500 |
| C | -1.03009300 | -1.52306700 | -2.22013000 |
| H | -0.37334300 | -0.84963800 | -1.65490300 |
| H | -1.06733900 | -1.10980700 | -3.24196000 |
| C | -0.41936700 | -2.92913200 | -2.26637400 |
| H | -1.07415100 | -3.58448900 | -2.85510000 |
| H | -0.39938900 | -3.34633100 | -1.25445000 |
| C | 0.99256300  | -2.95715400 | -2.86185600 |
| H | 1.64872500  | -2.30983300 | -2.26574600 |

|   |             |             |             |
|---|-------------|-------------|-------------|
| H | 0.97298100  | -2.52401500 | -3.87077400 |
| C | 1.59682400  | -4.36396000 | -2.92776900 |
| H | 0.94348100  | -5.01087200 | -3.52798000 |
| H | 1.61026800  | -4.79859800 | -1.92014300 |
| C | 3.01392300  | -4.39970000 | -3.51161800 |
| H | 3.66763800  | -3.75646000 | -2.90996900 |
| H | 3.00095200  | -3.96286700 | -4.51775700 |
| C | 3.60656300  | -5.81041300 | -3.57592300 |
| H | 2.99419300  | -6.46864900 | -4.20054500 |
| H | 4.61692600  | -5.80152100 | -3.99442400 |
| H | 3.66359700  | -6.26073800 | -2.57990100 |
| O | -2.10935000 | -2.13710100 | 0.79584100  |
| O | -2.18466300 | -3.54954100 | 0.86845800  |
| H | -3.09092700 | -3.69844500 | 1.17612700  |

### 2.2.13 C13 (*n*-C<sub>13</sub>H<sub>28</sub>)

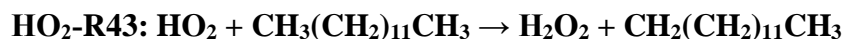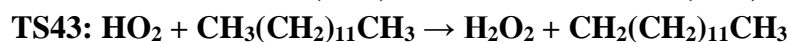

|   |             |             |             |
|---|-------------|-------------|-------------|
| C | -6.57881300 | -0.82710500 | 0.36816500  |
| H | -6.63416400 | -0.52047000 | 1.41409400  |
| H | -6.75185600 | 0.39118900  | -0.25277000 |
| H | -7.46592400 | -1.36337000 | 0.03145800  |
| C | -5.25320200 | -1.36554000 | -0.09919200 |
| H | -5.14371800 | -2.39261800 | 0.28831500  |
| H | -5.26117400 | -1.46682200 | -1.19126000 |
| C | -4.04389700 | -0.53020300 | 0.34021000  |
| H | -4.16096700 | 0.49226300  | -0.03484900 |
| H | -4.03810500 | -0.45661800 | 1.43521200  |
| C | -2.70607000 | -1.10297300 | -0.13910900 |
| H | -2.71349200 | -1.16823600 | -1.23480700 |
| H | -2.59727600 | -2.13283500 | 0.22615400  |
| C | -1.49465600 | -0.27745600 | 0.30872100  |
| H | -1.48333200 | -0.21762600 | 1.40478000  |
| H | -1.60908300 | 0.75341200  | -0.04977900 |
| C | -0.15435900 | -0.83753400 | -0.18052100 |
| H | -0.16554500 | -0.89478800 | -1.27670900 |
| H | -0.04084400 | -1.86976700 | 0.17583100  |
| C | 1.05652700  | -0.01218900 | 0.26934000  |
| H | 1.06952500  | 0.04264100  | 1.36568700  |
| H | 0.94058600  | 1.02059200  | -0.08405500 |
| C | 2.39746400  | -0.56707500 | -0.22425500 |
| H | 2.38430200  | -0.62123900 | -1.32061200 |
| H | 2.51377400  | -1.60013600 | 0.12864100  |

|   |             |             |             |
|---|-------------|-------------|-------------|
| C | 3.60771000  | 0.25921800  | 0.22565400  |
| H | 3.62238400  | 0.31149400  | 1.32210000  |
| H | 3.48975200  | 1.29272600  | -0.12511900 |
| C | 4.94881600  | -0.29237600 | -0.27131000 |
| H | 4.93383200  | -0.34462500 | -1.36776500 |
| H | 5.06733900  | -1.32589200 | 0.07951800  |
| C | 6.15867100  | 0.53457000  | 0.17773600  |
| H | 6.17596300  | 0.58566200  | 1.27437200  |
| H | 6.04016300  | 1.56877100  | -0.17138100 |
| C | 7.50030800  | -0.01393100 | -0.32128400 |
| H | 7.48361300  | -0.06493100 | -1.41685800 |
| H | 7.62023800  | -1.04668100 | 0.02844800  |
| C | 8.70238200  | 0.81995300  | 0.13172800  |
| H | 8.76769100  | 0.85895900  | 1.22378300  |
| H | 9.64217500  | 0.40366700  | -0.24187600 |
| H | 8.62826600  | 1.85020900  | -0.23080700 |
| O | -6.90849200 | 1.40362700  | -0.80426900 |
| O | -6.55855100 | 2.40655600  | 0.13382900  |
| H | -7.42305500 | 2.70944700  | 0.44847100  |

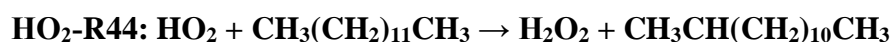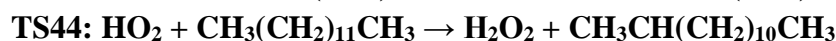

|   |             |             |             |
|---|-------------|-------------|-------------|
| C | -4.26466400 | 0.85007800  | -2.65225800 |
| H | -3.80949600 | 1.65840100  | -2.07331800 |
| H | -3.87609400 | 0.91862000  | -3.67857000 |
| H | -5.34183300 | 1.02764300  | -2.69621100 |
| C | -3.94807200 | -0.49883400 | -2.05641900 |
| H | -4.58799800 | -0.48294800 | -0.86712700 |
| H | -4.47034800 | -1.32999700 | -2.54055300 |
| C | -2.50549800 | -0.80147600 | -1.72325300 |
| H | -1.92219500 | -0.76262300 | -2.65857700 |
| H | -2.10163500 | 0.00034200  | -1.09230400 |
| C | -2.28089600 | -2.16056200 | -1.04792100 |
| H | -2.70106900 | -2.95147200 | -1.68243500 |
| H | -2.84205600 | -2.19206700 | -0.10713400 |
| C | -0.80410700 | -2.46395400 | -0.77261800 |
| H | -0.38099500 | -1.66583400 | -0.14916800 |
| H | -0.24611500 | -2.43933800 | -1.71780100 |
| C | -0.57632700 | -3.81517500 | -0.08556000 |
| H | -1.00993800 | -4.61272200 | -0.70291700 |
| H | -1.12602600 | -3.83401500 | 0.86409900  |
| C | 0.90083200  | -4.12847800 | 0.17850900  |
| H | 1.33681400  | -3.32731200 | 0.78929900  |

|   |             |              |             |
|---|-------------|--------------|-------------|
| H | 1.44857400  | -4.11663400  | -0.77275400 |
| C | 1.12774000  | -5.47482000  | 0.87552700  |
| H | 0.68524100  | -6.27549000  | 0.26860700  |
| H | 0.58566800  | -5.48342900  | 1.82993600  |
| C | 2.60532200  | -5.79346200  | 1.13094500  |
| H | 3.04928000  | -4.99078200  | 1.73402400  |
| H | 3.14620900  | -5.78910700  | 0.17572700  |
| C | 2.83189600  | -7.13695900  | 1.83359900  |
| H | 2.38421900  | -7.93934500  | 1.23274500  |
| H | 2.29444300  | -7.13950300  | 2.79073600  |
| C | 4.30951300  | -7.45874000  | 2.08371600  |
| H | 4.75884500  | -6.65592500  | 2.68297000  |
| H | 4.84720000  | -7.45894400  | 1.12651100  |
| C | 4.53704600  | -8.80060500  | 2.78927800  |
| H | 4.08778000  | -9.60301800  | 2.19135100  |
| H | 4.00143300  | -8.79956300  | 3.74643300  |
| C | 6.01626100  | -9.11390600  | 3.03306800  |
| H | 6.48510400  | -8.34721100  | 3.65813400  |
| H | 6.14416900  | -10.07617700 | 3.53676300  |
| H | 6.57193300  | -9.15585200  | 2.09086400  |
| O | -5.15180400 | -0.43816200  | 0.18100400  |
| O | -6.46442800 | -0.00013400  | -0.12131500 |
| H | -6.97095600 | -0.82561000  | -0.10435200 |

**HO<sub>2</sub>-R45: HO<sub>2</sub> + CH<sub>3</sub>(CH<sub>2</sub>)<sub>11</sub>CH<sub>3</sub> → H<sub>2</sub>O<sub>2</sub> + H<sub>2</sub>+CH<sub>3</sub>CH<sub>2</sub>CH(CH<sub>2</sub>)<sub>9</sub>CH<sub>3</sub>**

**TS45: HO<sub>2</sub> + CH<sub>3</sub>(CH<sub>2</sub>)<sub>11</sub>CH<sub>3</sub> → H<sub>2</sub>O<sub>2</sub> + H<sub>2</sub>+CH<sub>3</sub>CH<sub>2</sub>CH(CH<sub>2</sub>)<sub>9</sub>CH<sub>3</sub>**

|   |             |             |             |
|---|-------------|-------------|-------------|
| C | -4.20483900 | 0.82706400  | -2.83661600 |
| H | -3.80822300 | 1.65357500  | -2.24237900 |
| H | -3.67632000 | 0.81680900  | -3.79497400 |
| H | -5.25893000 | 1.03226400  | -3.03998500 |
| C | -4.03766600 | -0.50505500 | -2.09952800 |
| H | -4.60824800 | -0.48923500 | -1.16342000 |
| H | -4.47749000 | -1.31650600 | -2.70162000 |
| C | -2.60124200 | -0.86884800 | -1.80012800 |
| H | -1.91278000 | -0.68069000 | -2.63090000 |
| H | -2.19641200 | 0.10032800  | -0.94795200 |
| C | -2.34344600 | -2.16989200 | -1.07591200 |
| H | -2.77968100 | -2.98872100 | -1.67166200 |
| H | -2.89876900 | -2.17750900 | -0.12850300 |
| C | -0.86156500 | -2.47207600 | -0.82007100 |
| H | -0.42031400 | -1.65365600 | -0.23912500 |
| H | -0.32836700 | -2.48425400 | -1.77896500 |
| C | -0.62803300 | -3.80144400 | -0.09400800 |

|   |             |             |             |
|---|-------------|-------------|-------------|
| H | -1.07796500 | -4.61660300 | -0.67562900 |
| H | -1.15769400 | -3.78828900 | 0.86755600  |
| C | 0.85307500  | -4.11288700 | 0.14930700  |
| H | 1.30350100  | -3.29755900 | 0.73003500  |
| H | 1.38139500  | -4.12663600 | -0.81267600 |
| C | 1.09058400  | -5.44197900 | 0.87514800  |
| H | 0.63798800  | -6.25681500 | 0.29521800  |
| H | 0.56468100  | -5.42753300 | 1.83861400  |
| C | 2.57233900  | -5.75458300 | 1.11337800  |
| H | 3.02532100  | -4.93893500 | 1.69180900  |
| H | 3.09757900  | -5.77019300 | 0.14965500  |
| C | 2.81152500  | -7.08266000 | 1.84063400  |
| H | 2.35770700  | -7.89830700 | 1.26272200  |
| H | 2.28735000  | -7.06666500 | 2.80502200  |
| C | 4.29331400  | -7.39562900 | 2.07693900  |
| H | 4.74810100  | -6.58035500 | 2.65484500  |
| H | 4.81814600  | -7.41232300 | 1.11279900  |
| C | 4.53435800  | -8.72328700 | 2.80448600  |
| H | 4.08080900  | -9.53824800 | 2.22714500  |
| H | 4.01057700  | -8.70637500 | 3.76804000  |
| C | 6.01762300  | -9.02677000 | 3.03572200  |
| H | 6.49123900  | -8.24699400 | 3.64066800  |
| H | 6.15521600  | -9.97906900 | 3.55550300  |
| H | 6.56183700  | -9.08427400 | 2.08769100  |
| O | -1.89552000 | 0.93919200  | -0.15636300 |
| O | -2.80925600 | 0.77989900  | 0.91516700  |
| H | -2.28424800 | 0.29728000  | 1.57067500  |

**HO<sub>2</sub>-R46: HO<sub>2</sub> + CH<sub>3</sub>(CH<sub>2</sub>)<sub>11</sub>CH<sub>3</sub> → H<sub>2</sub>O<sub>2</sub> + CH<sub>3</sub>(CH<sub>2</sub>)<sub>2</sub>CH(CH<sub>2</sub>)<sub>8</sub>CH<sub>3</sub>**

**TS46: HO<sub>2</sub> + CH<sub>3</sub>(CH<sub>2</sub>)<sub>11</sub>CH<sub>3</sub> → H<sub>2</sub>O<sub>2</sub> + CH<sub>3</sub>(CH<sub>2</sub>)<sub>2</sub>CH(CH<sub>2</sub>)<sub>8</sub>CH<sub>3</sub>**

|   |             |             |             |
|---|-------------|-------------|-------------|
| C | -4.47894400 | 0.45607700  | -2.95778900 |
| H | -4.08224700 | 1.33511600  | -2.44015100 |
| H | -4.01442500 | 0.41765400  | -3.94855800 |
| H | -5.55152500 | 0.61281800  | -3.10004400 |
| C | -4.20608700 | -0.82356800 | -2.16304000 |
| H | -4.70337900 | -0.76932100 | -1.19011100 |
| H | -4.64672300 | -1.68108100 | -2.68547100 |
| C | -2.70949000 | -1.08336500 | -1.94816200 |
| H | -2.20979800 | -1.14553800 | -2.92964800 |
| H | -2.25292400 | -0.22325100 | -1.44165200 |
| C | -2.39461900 | -2.34588000 | -1.17840600 |
| H | -2.98446200 | -3.21356300 | -1.49406700 |
| H | -2.95214500 | -2.15042500 | 0.03976800  |

|   |             |             |             |
|---|-------------|-------------|-------------|
| C | -0.93929500 | -2.65999000 | -0.91541000 |
| H | -0.46812300 | -1.81279800 | -0.40071000 |
| H | -0.42418500 | -2.73393800 | -1.88760900 |
| C | -0.69736900 | -3.95056100 | -0.12293300 |
| H | -1.16718300 | -4.79014500 | -0.65138600 |
| H | -1.20041200 | -3.87510700 | 0.84782000  |
| C | 0.78802000  | -4.25845700 | 0.09589700  |
| H | 1.25554000  | -3.42049500 | 0.62872100  |
| H | 1.29309500  | -4.31934900 | -0.87695400 |
| C | 1.03596500  | -5.55447900 | 0.87580300  |
| H | 0.57001900  | -6.39274800 | 0.34153500  |
| H | 0.52907800  | -5.49460400 | 1.84752800  |
| C | 2.52112100  | -5.86165800 | 1.09930200  |
| H | 2.98577900  | -5.02538600 | 1.63750300  |
| H | 3.02903400  | -5.91619700 | 0.12766300  |
| C | 2.77032800  | -7.16120300 | 1.87315300  |
| H | 2.30675900  | -7.99765400 | 1.33400200  |
| H | 2.26134200  | -7.10750200 | 2.84428100  |
| C | 4.25526800  | -7.46736500 | 2.09830700  |
| H | 4.71922200  | -6.63228600 | 2.63941400  |
| H | 4.76549900  | -7.51957400 | 1.12757500  |
| C | 4.50618300  | -8.76809800 | 2.86972700  |
| H | 4.04371200  | -9.60286000 | 2.32891200  |
| H | 3.99660300  | -8.71592800 | 3.83963400  |
| C | 5.99240000  | -9.06500100 | 3.09026100  |
| H | 6.47564000  | -8.26398500 | 3.65874100  |
| H | 6.13650500  | -9.99745800 | 3.64319000  |
| H | 6.52266200  | -9.15883000 | 2.13723000  |
| O | -3.44051000 | -1.98172500 | 1.11318700  |
| O | -4.71406400 | -2.59850500 | 1.05549400  |
| H | -4.55936800 | -3.44520200 | 1.49965400  |

**HO<sub>2</sub>-R47: HO<sub>2</sub> + CH<sub>3</sub>(CH<sub>2</sub>)<sub>11</sub>CH<sub>3</sub> → H<sub>2</sub>O<sub>2</sub> + CH<sub>3</sub>(CH<sub>2</sub>)<sub>3</sub>CH(CH<sub>2</sub>)<sub>7</sub>CH<sub>3</sub>**

**TS47: HO<sub>2</sub> + CH<sub>3</sub>(CH<sub>2</sub>)<sub>11</sub>CH<sub>3</sub> → H<sub>2</sub>O<sub>2</sub> + CH<sub>3</sub>(CH<sub>2</sub>)<sub>3</sub>CH(CH<sub>2</sub>)<sub>7</sub>CH<sub>3</sub>**

|   |             |             |             |
|---|-------------|-------------|-------------|
| C | -4.31055300 | 0.60007900  | -3.11421200 |
| H | -3.86833700 | 1.45427400  | -2.59232200 |
| H | -3.83814100 | 0.53470600  | -4.09962300 |
| H | -5.37111700 | 0.81741300  | -3.26867400 |
| C | -4.11484200 | -0.69378200 | -2.31894700 |
| H | -4.62540900 | -0.60828100 | -1.35222900 |
| H | -4.59937500 | -1.52448700 | -2.84725100 |
| C | -2.64046700 | -1.03615400 | -2.07838100 |
| H | -2.12780100 | -1.12679100 | -3.04488000 |

|   |             |              |             |
|---|-------------|--------------|-------------|
| H | -2.15519700 | -0.20977200  | -1.54786800 |
| C | -2.44353000 | -2.32906600  | -1.27802600 |
| H | -2.93284900 | -3.16319700  | -1.80856300 |
| H | -2.96055200 | -2.24963200  | -0.31339100 |
| C | -0.99932700 | -2.70523400  | -1.03993500 |
| H | -0.52436200 | -1.69385900  | -0.27768000 |
| H | -0.35635400 | -2.58282200  | -1.91796500 |
| C | -0.72529700 | -3.96728900  | -0.25476400 |
| H | -1.19168300 | -4.81238600  | -0.78770600 |
| H | -1.24326600 | -3.91699400  | 0.71231400  |
| C | 0.76227700  | -4.27239500  | -0.03826500 |
| H | 1.23070700  | -3.43144000  | 0.48608700  |
| H | 1.25994700  | -4.33688600  | -1.01407500 |
| C | 1.00960600  | -5.56733000  | 0.74326100  |
| H | 0.53675400  | -6.40595900  | 0.21566800  |
| H | 0.51005400  | -5.50386300  | 1.71888500  |
| C | 2.49534200  | -5.87851300  | 0.95687000  |
| H | 2.96777600  | -5.04040200  | 1.48522100  |
| H | 2.99475700  | -5.94118500  | -0.01854100 |
| C | 2.74566300  | -7.17397100  | 1.73715900  |
| H | 2.27398500  | -8.01206800  | 1.20774800  |
| H | 2.24542300  | -7.11183600  | 2.71240200  |
| C | 4.23128500  | -7.48457800  | 1.95144300  |
| H | 4.70357100  | -6.64721000  | 2.48166900  |
| H | 4.73248200  | -7.54652500  | 0.97663800  |
| C | 4.48361400  | -8.78021400  | 2.73090900  |
| H | 4.01297500  | -9.61730300  | 2.20086600  |
| H | 3.98288000  | -8.71829000  | 3.70487600  |
| C | 5.97050700  | -9.08146900  | 2.94067100  |
| H | 6.46207200  | -8.27792200  | 3.49832700  |
| H | 6.11561700  | -10.01002900 | 3.49982400  |
| H | 6.49186600  | -9.18520400  | 1.98379000  |
| O | -0.15250500 | -0.80922700  | 0.42964800  |
| O | -1.11224500 | -0.73782000  | 1.47017400  |
| H | -0.67014900 | -1.19981700  | 2.19771700  |

**HO<sub>2</sub>-R48: HO<sub>2</sub> + CH<sub>3</sub>(CH<sub>2</sub>)<sub>11</sub>CH<sub>3</sub> → H<sub>2</sub>O<sub>2</sub> + CH<sub>3</sub>(CH<sub>2</sub>)<sub>4</sub>CH(CH<sub>2</sub>)<sub>6</sub>CH<sub>3</sub>**

**TS48: HO<sub>2</sub> + CH<sub>3</sub>(CH<sub>2</sub>)<sub>11</sub>CH<sub>3</sub> → H<sub>2</sub>O<sub>2</sub> + CH<sub>3</sub>(CH<sub>2</sub>)<sub>4</sub>CH(CH<sub>2</sub>)<sub>6</sub>CH<sub>3</sub>**

|   |             |             |             |
|---|-------------|-------------|-------------|
| C | -4.23812300 | 0.78663900  | -2.90137000 |
| H | -3.87466200 | 1.61293000  | -2.28215000 |
| H | -3.70882700 | 0.83400200  | -3.85846100 |
| H | -5.29899900 | 0.96300600  | -3.09983200 |
| C | -4.01410000 | -0.56191000 | -2.21093400 |



|   |             |              |             |
|---|-------------|--------------|-------------|
| H | -4.58128800 | -0.59208700  | -1.27311000 |
| H | -4.42077200 | -1.36512500  | -2.83758600 |
| C | -2.53844000 | -0.85246700  | -1.91451400 |
| H | -1.96920600 | -0.82268100  | -2.85324900 |
| H | -2.13263000 | -0.04757600  | -1.28780300 |
| C | -2.30789700 | -2.19855200  | -1.21954800 |
| H | -2.71152400 | -3.00441900  | -1.84603100 |
| H | -2.87120700 | -2.22923200  | -0.28139800 |
| C | -0.82815200 | -2.48094000  | -0.93023500 |
| H | -0.40884900 | -1.67319700  | -0.31705700 |
| H | -0.26340100 | -2.45544200  | -1.87728400 |
| C | -0.56013800 | -3.80938500  | -0.25982400 |
| H | -1.12273000 | -4.64418000  | -0.69242900 |
| H | -1.18538500 | -3.71995700  | 0.93731800  |
| C | 0.87633600  | -4.14664900  | 0.07008300  |
| H | 1.30800700  | -3.34661900  | 0.68510400  |
| H | 1.45417500  | -4.13739600  | -0.86900200 |
| C | 1.07287200  | -5.49990700  | 0.76466700  |
| H | 0.64496800  | -6.29211300  | 0.13675500  |
| H | 0.50523700  | -5.50729100  | 1.70191300  |
| C | 2.54265200  | -5.82290400  | 1.05539400  |
| H | 2.96934000  | -5.02904100  | 1.68181000  |
| H | 3.11081900  | -5.80699400  | 0.11614900  |
| C | 2.74700600  | -7.17565700  | 1.74663500  |
| H | 2.32034900  | -7.97016200  | 1.12050200  |
| H | 2.17869600  | -7.19089600  | 2.68550500  |
| C | 4.21614200  | -7.49905000  | 2.04065000  |
| H | 4.64332000  | -6.70496100  | 2.66697200  |
| H | 4.78564600  | -7.48377800  | 1.10215000  |
| C | 4.42222400  | -8.85126800  | 2.73278900  |
| H | 3.99770800  | -9.64538300  | 2.10637100  |
| H | 3.85217800  | -8.86664000  | 3.66972000  |
| C | 5.89253500  | -9.16415700  | 3.02568100  |
| H | 6.33568000  | -8.40567100  | 3.67881800  |
| H | 6.00476800  | -10.13341400 | 3.51952300  |
| H | 6.48264800  | -9.19089600  | 2.10409800  |
| O | -1.67915500 | -3.61464900  | 2.01695900  |
| O | -3.03343800 | -3.99957100  | 1.86223900  |
| H | -3.03263100 | -4.91329700  | 2.18354600  |

**HO<sub>2</sub>-R49:**  $\text{HO}_2 + \text{CH}_3(\text{CH}_2)_{11}\text{CH}_3 \rightarrow \text{H}_2\text{O}_2 + \text{CH}_3(\text{CH}_2)_5\text{CH}(\text{CH}_2)_5\text{CH}_3$

**TS49:**  $\text{HO}_2 + \text{CH}_3(\text{CH}_2)_{11}\text{CH}_3 \rightarrow \text{H}_2\text{O}_2 + \text{CH}_3(\text{CH}_2)_5\text{CH}(\text{CH}_2)_5\text{CH}_3$

|   |             |            |             |
|---|-------------|------------|-------------|
| C | -3.86454600 | 0.19925300 | -3.62886200 |
|---|-------------|------------|-------------|

|   |             |              |             |
|---|-------------|--------------|-------------|
| H | -3.39534200 | 1.05418900   | -3.13178600 |
| H | -3.42574600 | 0.11791000   | -4.62850900 |
| H | -4.92692100 | 0.42849200   | -3.75084500 |
| C | -3.65753100 | -1.08880300  | -2.82673900 |
| H | -4.13671000 | -0.98868900  | -1.84522400 |
| H | -4.16835400 | -1.91868200  | -3.33051800 |
| C | -2.18085600 | -1.45069100  | -2.63038100 |
| H | -1.70129100 | -1.55269700  | -3.61281600 |
| H | -1.66907100 | -0.61971500  | -2.12817400 |
| C | -1.96579300 | -2.73638200  | -1.82456400 |
| H | -2.47892400 | -3.56777500  | -2.32604400 |
| H | -2.44481800 | -2.63113700  | -0.84269000 |
| C | -0.48901000 | -3.09497800  | -1.62666000 |
| H | 0.02472200  | -2.26894600  | -1.12341400 |
| H | -0.00822700 | -3.20735000  | -2.60697400 |
| C | -0.28524800 | -4.37942000  | -0.81403000 |
| H | -0.80335700 | -5.21347400  | -1.31658300 |
| H | -0.77001700 | -4.27875800  | 0.16523200  |
| C | 1.16013100  | -4.77388500  | -0.61662000 |
| H | 1.67358900  | -3.76029000  | 0.11720900  |
| H | 1.77633900  | -4.67289300  | -1.51629400 |
| C | 1.44068500  | -6.02908700  | 0.17741300  |
| H | 0.94134100  | -6.87382300  | -0.32531100 |
| H | 0.95851100  | -5.95533300  | 1.16139000  |
| C | 2.92978600  | -6.35620800  | 0.34539400  |
| H | 3.43208000  | -5.51197100  | 0.83173400  |
| H | 3.38890000  | -6.45234200  | -0.64658600 |
| C | 3.18429900  | -7.63678300  | 1.14800400  |
| H | 2.67290400  | -8.47803600  | 0.66214400  |
| H | 2.72799200  | -7.53898000  | 2.14185600  |
| C | 4.67104300  | -7.97379800  | 1.30697600  |
| H | 5.18406900  | -7.13138700  | 1.78892200  |
| H | 5.12669500  | -8.07686100  | 0.31354800  |
| C | 4.92974700  | -9.25041400  | 2.11513100  |
| H | 4.41597800  | -10.09192000 | 1.63445800  |
| H | 4.47671800  | -9.14624900  | 3.10868700  |
| C | 6.41760400  | -9.58068400  | 2.26578000  |
| H | 6.95290200  | -8.77223300  | 2.77381600  |
| H | 6.56743100  | -10.49449400 | 2.84743900  |
| H | 6.89097800  | -9.72698700  | 1.28973900  |
| O | 2.07674200  | -2.87147900  | 0.80216000  |
| O | 1.15111300  | -2.77797900  | 1.87155000  |
| H | 1.61098000  | -3.23686500  | 2.59000200  |

### 2.2.14 C14 (*n*-C<sub>14</sub>H<sub>30</sub>)

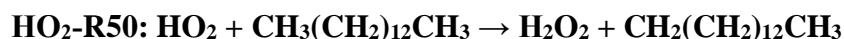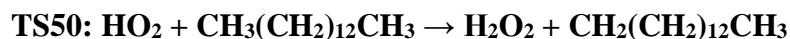

|   |             |             |             |
|---|-------------|-------------|-------------|
| C | -7.18823900 | -0.93570000 | 0.34504100  |
| H | -7.18492800 | -1.26516100 | 1.38506000  |
| H | -7.38107600 | 0.41970500  | 0.50276200  |
| H | -8.09569300 | -1.21805700 | -0.18897100 |
| C | -5.89517000 | -1.08047600 | -0.41023000 |
| H | -5.78884500 | -2.13601100 | -0.71265900 |
| H | -5.95230100 | -0.51324900 | -1.34735200 |
| C | -4.65323200 | -0.65361400 | 0.38196600  |
| H | -4.76312200 | 0.39552100  | 0.67751000  |
| H | -4.60443900 | -1.23358000 | 1.31259300  |
| C | -3.34681600 | -0.83257000 | -0.39827200 |
| H | -3.39854500 | -0.25008700 | -1.32700400 |
| H | -3.24506300 | -1.88274800 | -0.70251700 |
| C | -2.10171500 | -0.41307800 | 0.39130500  |
| H | -2.05156800 | -0.99323000 | 1.32194400  |
| H | -2.20337700 | 0.63695200  | 0.69358400  |
| C | -0.79299400 | -0.59180900 | -0.38638500 |
| H | -0.84288300 | -0.01103000 | -1.31654700 |
| H | -0.69296400 | -1.64215100 | -0.68983100 |
| C | 0.45297100  | -0.17400300 | 0.40291600  |
| H | 0.50127500  | -0.75290400 | 1.33443500  |
| H | 0.35418400  | 0.87685700  | 0.70428000  |
| C | 1.76227800  | -0.35621500 | -0.37310000 |
| H | 1.71450500  | 0.22291600  | -1.30446500 |
| H | 1.86034800  | -1.40721800 | -0.67475400 |
| C | 3.00846100  | 0.06025300  | 0.41659400  |
| H | 3.05401900  | -0.51652600 | 1.34956000  |
| H | 2.91218500  | 1.11213800  | 0.71543500  |
| C | 4.31847600  | -0.12726800 | -0.35699000 |
| H | 4.27401800  | 0.45009000  | -1.28962300 |
| H | 4.41388100  | -1.17914200 | -0.65636400 |
| C | 5.56457500  | 0.28700400  | 0.43405100  |
| H | 5.60624200  | -0.28747200 | 1.36863400  |
| H | 5.47135400  | 1.34005200  | 0.72991200  |
| C | 6.87557300  | 0.09311600  | -0.33586700 |
| H | 6.83599900  | 0.66785400  | -1.27054600 |
| H | 6.96940000  | -0.95995300 | -0.63210200 |
| C | 8.12198900  | 0.50574900  | 0.45560100  |
| H | 8.16062100  | -0.06656300 | 1.39055200  |
| H | 8.03055000  | 1.55888800  | 0.74834900  |

|   |             |             |             |
|---|-------------|-------------|-------------|
| C | 9.42719500  | 0.30367900  | -0.31964900 |
| H | 9.43294000  | 0.88929200  | -1.24454400 |
| H | 10.29534500 | 0.60897300  | 0.27127200  |
| H | 9.56553700  | -0.74692500 | -0.59430100 |
| O | -7.52787800 | 1.57094500  | 0.58931400  |
| O | -7.27249200 | 2.07446300  | -0.71093900 |
| H | -8.16476000 | 2.20909300  | -1.06318400 |

**HO<sub>2</sub>-R51: HO<sub>2</sub> + CH<sub>3</sub>(CH<sub>2</sub>)<sub>12</sub>CH<sub>3</sub> → H<sub>2</sub>O<sub>2</sub> + CH<sub>3</sub>CH(CH<sub>2</sub>)<sub>11</sub>CH<sub>3</sub>**

**TS51: HO<sub>2</sub> + CH<sub>3</sub>(CH<sub>2</sub>)<sub>12</sub>CH<sub>3</sub> → H<sub>2</sub>O<sub>2</sub> + CH<sub>3</sub>CH(CH<sub>2</sub>)<sub>11</sub>CH<sub>3</sub>**

|   |             |             |             |
|---|-------------|-------------|-------------|
| C | -6.83626600 | 3.49867800  | -0.30465100 |
| H | -6.36799100 | 4.19350800  | 0.39791000  |
| H | -6.76462200 | 3.94372200  | -1.30754200 |
| H | -7.89695700 | 3.42371800  | -0.05349200 |
| C | -6.16202700 | 2.14994500  | -0.27572200 |
| H | -6.43747100 | 1.67900000  | 0.95974400  |
| H | -6.66429800 | 1.39093000  | -0.88364500 |
| C | -4.65501600 | 2.11245800  | -0.38244400 |
| H | -4.36900800 | 2.54426200  | -1.35624100 |
| H | -4.22010600 | 2.77881100  | 0.37311500  |
| C | -4.04336600 | 0.71111700  | -0.25575100 |
| H | -4.49338600 | 0.05243300  | -1.00960100 |
| H | -4.31099300 | 0.28847900  | 0.71931900  |
| C | -2.51931100 | 0.69822700  | -0.41647100 |
| H | -2.07186500 | 1.37170900  | 0.32576900  |
| H | -2.25382300 | 1.10950000  | -1.39916600 |
| C | -1.90190300 | -0.69686700 | -0.26728400 |
| H | -2.35565600 | -1.37422600 | -1.00244100 |
| H | -2.16173300 | -1.10186600 | 0.71906500  |
| C | -0.37844500 | -0.71567500 | -0.43624900 |
| H | 0.07440500  | -0.02853900 | 0.29022700  |
| H | -0.11938000 | -0.32238200 | -1.42784500 |
| C | 0.24051500  | -2.10785500 | -0.26670800 |
| H | -0.21704100 | -2.79755100 | -0.98790800 |
| H | -0.01366600 | -2.49698100 | 0.72768300  |
| C | 1.76308900  | -2.12972700 | -0.44339400 |
| H | 2.22023800  | -1.43376200 | 0.27196300  |
| H | 2.01680700  | -1.74864600 | -1.44111200 |
| C | 2.38275900  | -3.51993500 | -0.26063400 |
| H | 1.92238800  | -4.21746100 | -0.97243400 |
| H | 2.13247900  | -3.89827000 | 0.73893800  |
| C | 3.90466800  | -3.54404100 | -0.44292000 |
| H | 4.36492100  | -2.84281300 | 0.26532800  |

|   |             |             |             |
|---|-------------|-------------|-------------|
| H | 4.15472000  | -3.17070500 | -1.44450400 |
| C | 4.52463700  | -4.93285200 | -0.25225500 |
| H | 4.06335800  | -5.63568900 | -0.95849000 |
| H | 4.27720600  | -5.30534700 | 0.75039900  |
| C | 6.04618000  | -4.95949600 | -0.43742800 |
| H | 6.50745600  | -4.25690500 | 0.26739600  |
| H | 6.29355200  | -4.58946800 | -1.43991900 |
| C | 6.65603200  | -6.35080800 | -0.24226000 |
| H | 6.23971500  | -7.06882700 | -0.95603100 |
| H | 7.74068000  | -6.33570000 | -0.38133800 |
| H | 6.45563100  | -6.73247700 | 0.76390900  |
| O | -6.68176700 | 1.29243800  | 2.05925000  |
| O | -8.07775000 | 1.47442500  | 2.21627200  |
| H | -8.42423300 | 0.58201100  | 2.06861300  |

**HO<sub>2</sub>-R52: HO<sub>2</sub> + CH<sub>3</sub>(CH<sub>2</sub>)<sub>12</sub>CH<sub>3</sub> → H<sub>2</sub>O<sub>2</sub> + H<sub>2</sub>+CH<sub>3</sub>CH<sub>2</sub>CH(CH<sub>2</sub>)<sub>10</sub>CH<sub>3</sub>**

**TS52: HO<sub>2</sub> + CH<sub>3</sub>(CH<sub>2</sub>)<sub>12</sub>CH<sub>3</sub> → H<sub>2</sub>O<sub>2</sub> + H<sub>2</sub>+CH<sub>3</sub>CH<sub>2</sub>CH(CH<sub>2</sub>)<sub>10</sub>CH<sub>3</sub>**

|   |             |             |             |
|---|-------------|-------------|-------------|
| C | -6.70004400 | 3.93276800  | -0.70096800 |
| H | -6.26202600 | 4.57512400  | 0.06659000  |
| H | -6.42685300 | 4.34139800  | -1.67884200 |
| H | -7.78764000 | 3.98920800  | -0.60860700 |
| C | -6.21044500 | 2.48912100  | -0.55033100 |
| H | -6.52725900 | 2.08480500  | 0.41827400  |
| H | -6.69625100 | 1.85533300  | -1.30975800 |
| C | -4.71431600 | 2.32705300  | -0.69229300 |
| H | -4.28156300 | 2.90457400  | -1.51621400 |
| H | -4.21449900 | 3.02076900  | 0.35614300  |
| C | -4.14391400 | 0.93425900  | -0.55540200 |
| H | -4.62498600 | 0.28848900  | -1.30854400 |
| H | -4.43925500 | 0.51279300  | 0.41468900  |
| C | -2.62196400 | 0.85087200  | -0.72399500 |
| H | -2.13992500 | 1.50651500  | 0.01076700  |
| H | -2.34828000 | 1.24856700  | -1.70930500 |
| C | -2.07097900 | -0.57251200 | -0.58093700 |
| H | -2.55747300 | -1.22602400 | -1.31672500 |
| H | -2.34563200 | -0.97039700 | 0.40475700  |
| C | -0.55082600 | -0.65998900 | -0.75468800 |
| H | -0.06491800 | -0.00333900 | -0.02144400 |
| H | -0.27680700 | -0.26596800 | -1.74178200 |
| C | 0.00418100  | -2.08149700 | -0.60578600 |
| H | -0.48008700 | -2.73811900 | -1.34023000 |
| H | -0.27131600 | -2.47568700 | 0.38101900  |
| C | 1.52483800  | -2.16725100 | -0.77656900 |

|   |             |             |             |
|---|-------------|-------------|-------------|
| H | 2.00807700  | -1.50662800 | -0.04503800 |
| H | 1.80026100  | -1.77724100 | -1.76496100 |
| C | 2.08262800  | -3.58684400 | -0.61997300 |
| H | 1.60180200  | -4.24767800 | -1.35293100 |
| H | 1.80507000  | -3.97727900 | 0.36771800  |
| C | 3.60398400  | -3.67050700 | -0.78606400 |
| H | 4.08400500  | -3.00731600 | -0.05468900 |
| H | 3.88165000  | -3.28248300 | -1.77467000 |
| C | 4.16382500  | -5.08850600 | -0.62469000 |
| H | 3.68634200  | -5.75256700 | -1.35719100 |
| H | 3.88515400  | -5.47778200 | 0.36331800  |
| C | 5.68568400  | -5.17211100 | -0.78694400 |
| H | 6.16299100  | -4.50885500 | -0.05524000 |
| H | 5.96464000  | -4.78486400 | -1.77446600 |
| C | 6.23535000  | -6.59223700 | -0.62192000 |
| H | 5.80367000  | -7.27222900 | -1.36329800 |
| H | 7.32206700  | -6.61765800 | -0.74178900 |
| H | 6.00116800  | -6.99381200 | 0.36913700  |
| O | -3.81186700 | 3.59498200  | 1.31974700  |
| O | -4.34435600 | 2.88345500  | 2.42372300  |
| H | -3.59146900 | 2.34644700  | 2.71194300  |

**HO<sub>2</sub>-R53: HO<sub>2</sub> + CH<sub>3</sub>(CH<sub>2</sub>)<sub>12</sub>CH<sub>3</sub> → H<sub>2</sub>O<sub>2</sub> + CH<sub>3</sub>(CH<sub>2</sub>)<sub>2</sub>CH(CH<sub>2</sub>)<sub>9</sub>CH<sub>3</sub>**

**TS53: HO<sub>2</sub> + CH<sub>3</sub>(CH<sub>2</sub>)<sub>12</sub>CH<sub>3</sub> → H<sub>2</sub>O<sub>2</sub> + CH<sub>3</sub>(CH<sub>2</sub>)<sub>2</sub>CH(CH<sub>2</sub>)<sub>9</sub>CH<sub>3</sub>**

|   |             |             |             |
|---|-------------|-------------|-------------|
| C | -6.66470800 | 4.02746400  | -0.27101300 |
| H | -6.30590400 | 4.56265700  | 0.61379600  |
| H | -6.35031700 | 4.59657100  | -1.15209500 |
| H | -7.75755000 | 4.03727500  | -0.24217800 |
| C | -6.12333600 | 2.59582000  | -0.30811000 |
| H | -6.47681100 | 2.04340500  | 0.56755500  |
| H | -6.52654900 | 2.07352100  | -1.18404400 |
| C | -4.59126400 | 2.54023700  | -0.35421900 |
| H | -4.23698600 | 3.09486400  | -1.23956600 |
| H | -4.17499400 | 3.07247500  | 0.51064600  |
| C | -4.01343400 | 1.14429700  | -0.41160100 |
| H | -4.53643100 | 0.47858500  | -1.10718400 |
| H | -4.38321900 | 0.57329400  | 0.75811400  |
| C | -2.50815500 | 1.01219300  | -0.45585100 |
| H | -2.06964100 | 1.53055900  | 0.40651800  |
| H | -2.14258500 | 1.55808400  | -1.34145900 |
| C | -1.99467100 | -0.43228800 | -0.51145400 |
| H | -2.43030300 | -0.93512400 | -1.38454800 |
| H | -2.35448400 | -0.97499100 | 0.37003200  |

|   |             |             |             |
|---|-------------|-------------|-------------|
| C | -0.46709600 | -0.52987900 | -0.58102300 |
| H | -0.03373000 | -0.02912600 | 0.29423600  |
| H | -0.10697100 | 0.02469900  | -1.45747200 |
| C | 0.05230700  | -1.97083600 | -0.64669100 |
| H | -0.37722400 | -2.47062800 | -1.52470900 |
| H | -0.31171500 | -2.52639200 | 0.22719800  |
| C | 1.58052700  | -2.06941800 | -0.70684000 |
| H | 2.00897400  | -1.57283000 | 0.17335900  |
| H | 1.94491500  | -1.50943300 | -1.57795400 |
| C | 2.10238000  | -3.50929900 | -0.77807100 |
| H | 1.67697600  | -4.00501900 | -1.66035300 |
| H | 1.73559200  | -4.07056900 | 0.09114500  |
| C | 3.63100900  | -3.60593700 | -0.83275900 |
| H | 4.05581200  | -3.11268300 | 0.05115700  |
| H | 3.99782700  | -3.04158200 | -1.70005300 |
| C | 4.15522000  | -5.04448300 | -0.90860700 |
| H | 3.73214100  | -5.53838600 | -1.79322500 |
| H | 3.78877900  | -5.61029000 | -0.04194700 |
| C | 5.68398400  | -5.14075700 | -0.96228100 |
| H | 6.10730800  | -4.65027500 | -0.07726500 |
| H | 6.05037100  | -4.57433500 | -1.82721300 |
| C | 6.19830600  | -6.58127300 | -1.04168900 |
| H | 5.82013300  | -7.08742700 | -1.93565400 |
| H | 7.29077300  | -6.61500900 | -1.07876600 |
| H | 5.87764100  | -7.16452000 | -0.17254500 |
| O | -4.65539100 | 0.09698100  | 1.81606900  |
| O | -5.92988800 | -0.49933100 | 1.65393800  |
| H | -5.71193800 | -1.43478300 | 1.52935500  |

**HO<sub>2</sub>-R54: HO<sub>2</sub> + CH<sub>3</sub>(CH<sub>2</sub>)<sub>12</sub>CH<sub>3</sub> → H<sub>2</sub>O<sub>2</sub> + CH<sub>3</sub>(CH<sub>2</sub>)<sub>3</sub>CH(CH<sub>2</sub>)<sub>8</sub>CH<sub>3</sub>**

**TS54: HO<sub>2</sub> + CH<sub>3</sub>(CH<sub>2</sub>)<sub>12</sub>CH<sub>3</sub> → H<sub>2</sub>O<sub>2</sub> + CH<sub>3</sub>(CH<sub>2</sub>)<sub>3</sub>CH(CH<sub>2</sub>)<sub>8</sub>CH<sub>3</sub>**

|   |             |            |             |
|---|-------------|------------|-------------|
| C | -6.15136900 | 5.30590000 | 0.20488100  |
| H | -5.69664900 | 5.56041000 | 1.16720100  |
| H | -5.74172800 | 5.99007800 | -0.54513100 |
| H | -7.22448900 | 5.50171700 | 0.28178600  |
| C | -5.87410600 | 3.84635500 | -0.16673700 |
| H | -6.32603800 | 3.18714400 | 0.58411200  |
| H | -6.36933200 | 3.61076800 | -1.11704600 |
| C | -4.37945200 | 3.52748800 | -0.27970100 |
| H | -3.92446500 | 4.18547600 | -1.03154300 |
| H | -3.88459800 | 3.75566700 | 0.67058000  |
| C | -4.09825100 | 2.06682300 | -0.65149100 |
| H | -4.58994500 | 1.83454900 | -1.61100500 |

|   |             |             |             |
|---|-------------|-------------|-------------|
| H | -4.56245300 | 1.40040000  | 0.08655200  |
| C | -2.63142900 | 1.72562200  | -0.77769200 |
| H | -2.15597700 | 1.88544900  | 0.47822000  |
| H | -2.03883500 | 2.48814800  | -1.29418700 |
| C | -2.27299700 | 0.30893000  | -1.16395800 |
| H | -2.73938600 | 0.08903900  | -2.13847800 |
| H | -2.73981000 | -0.39130200 | -0.45825100 |
| C | -0.76662000 | 0.03551800  | -1.25682600 |
| H | -0.29709100 | 0.26833200  | -0.29401100 |
| H | -0.32166000 | 0.72453500  | -1.98580900 |
| C | -0.43411600 | -1.40678700 | -1.65468400 |
| H | -0.90997800 | -1.63723800 | -2.61676600 |
| H | -0.87914400 | -2.09582500 | -0.92478400 |
| C | 1.07026900  | -1.68237200 | -1.75653800 |
| H | 1.54651500  | -1.44893100 | -0.79556100 |
| H | 1.51448300  | -0.99593900 | -2.48892200 |
| C | 1.40501400  | -3.12580600 | -2.14940500 |
| H | 0.92818100  | -3.35908600 | -3.11026200 |
| H | 0.96114400  | -3.81218900 | -1.41653100 |
| C | 2.90941000  | -3.40134500 | -2.25243900 |
| H | 3.38641000  | -3.16748300 | -1.29180700 |
| H | 3.35308900  | -2.71534700 | -2.98571500 |
| C | 3.24488100  | -4.84460300 | -2.64461200 |
| H | 2.76739800  | -5.07957100 | -3.60494300 |
| H | 2.80302800  | -5.53162900 | -1.91090900 |
| C | 4.74902700  | -5.12064700 | -2.75031300 |
| H | 5.22648900  | -4.88884100 | -1.79046600 |
| H | 5.19075900  | -4.43351700 | -3.48236400 |
| C | 5.07385100  | -6.56409400 | -3.14614500 |
| H | 4.63818000  | -6.81465500 | -4.11862800 |
| H | 6.15304400  | -6.72734200 | -3.21416100 |
| H | 4.67621100  | -7.27425100 | -2.41407900 |
| O | -1.78829500 | 1.98584300  | 1.60805500  |
| O | -2.65012600 | 1.14322600  | 2.35360700  |
| H | -2.10960900 | 0.35013700  | 2.48427300  |

**HO<sub>2</sub>-R55: HO<sub>2</sub> + CH<sub>3</sub>(CH<sub>2</sub>)<sub>12</sub>CH<sub>3</sub> → H<sub>2</sub>O<sub>2</sub> + CH<sub>3</sub>(CH<sub>2</sub>)<sub>4</sub>CH(CH<sub>2</sub>)<sub>7</sub>CH<sub>3</sub>**

**TS55: HO<sub>2</sub> + CH<sub>3</sub>(CH<sub>2</sub>)<sub>12</sub>CH<sub>3</sub> → H<sub>2</sub>O<sub>2</sub> + CH<sub>3</sub>(CH<sub>2</sub>)<sub>4</sub>CH(CH<sub>2</sub>)<sub>7</sub>CH<sub>3</sub>**

|   |             |            |             |
|---|-------------|------------|-------------|
| C | -6.31635200 | 5.07984400 | -0.81937300 |
| H | -5.87724600 | 5.45072100 | 0.11225800  |
| H | -5.91063700 | 5.68291200 | -1.63806600 |
| H | -7.39341200 | 5.26375400 | -0.77410200 |
| C | -6.01027300 | 3.59306100 | -1.02220400 |



|   |             |             |             |
|---|-------------|-------------|-------------|
| H | -6.45547000 | 3.01290600  | -0.20521900 |
| H | -6.49428400 | 3.24263600  | -1.94205500 |
| C | -4.50992800 | 3.28804800  | -1.09575100 |
| H | -4.06368400 | 3.86835300  | -1.91454100 |
| H | -4.02587400 | 3.63995500  | -0.17537400 |
| C | -4.19741500 | 1.80111800  | -1.29424300 |
| H | -4.68466400 | 1.44690600  | -2.21169600 |
| H | -4.63245200 | 1.22180800  | -0.47325700 |
| C | -2.69445300 | 1.50747500  | -1.37909200 |
| H | -2.19272100 | 1.87360200  | -0.47431300 |
| H | -2.25924900 | 2.08591200  | -2.21134500 |
| C | -2.34927900 | 0.05060400  | -1.58947100 |
| H | -2.97635700 | -0.44895500 | -2.33628700 |
| H | -2.80666500 | -0.56874500 | -0.47642400 |
| C | -0.88484700 | -0.31329600 | -1.68076100 |
| H | -0.36065100 | 0.04975900  | -0.78745600 |
| H | -0.44597700 | 0.24502900  | -2.52438900 |
| C | -0.60770400 | -1.80936900 | -1.87451000 |
| H | -1.13661800 | -2.16022000 | -2.77009300 |
| H | -1.02898000 | -2.36425200 | -1.02851700 |
| C | 0.88360600  | -2.13655700 | -2.00709200 |
| H | 1.41160100  | -1.78138500 | -1.11280900 |
| H | 1.30508900  | -1.57560100 | -2.85150000 |
| C | 1.16803900  | -3.63023700 | -2.20119400 |
| H | 0.63910900  | -3.98652200 | -3.09479600 |
| H | 0.74769800  | -4.19043400 | -1.35603300 |
| C | 2.65950000  | -3.95839500 | -2.33327000 |
| H | 3.18811700  | -3.60089400 | -1.44009900 |
| H | 3.07975000  | -3.39819300 | -3.17870800 |
| C | 2.94609600  | -5.45178100 | -2.52547300 |
| H | 2.41866500  | -5.81041300 | -3.41918100 |
| H | 2.52597800  | -6.01286500 | -1.68043300 |
| C | 4.43759300  | -5.78062700 | -2.65608600 |
| H | 4.96464800  | -5.42289500 | -1.76317700 |
| H | 4.85761400  | -5.22083500 | -3.50071100 |
| C | 4.71418000  | -7.27484500 | -2.84699600 |
| H | 4.22959400  | -7.65443800 | -3.75225300 |
| H | 5.78553200  | -7.47565600 | -2.93537900 |
| H | 4.33567500  | -7.85805400 | -2.00147500 |
| O | -3.15940700 | -1.09814600 | 0.53104000  |
| O | -4.48520800 | -1.53469200 | 0.29216300  |
| H | -4.36603400 | -2.47399900 | 0.08811200  |

**HO<sub>2</sub>-R56: HO<sub>2</sub> + CH<sub>3</sub>(CH<sub>2</sub>)<sub>12</sub>CH<sub>3</sub> → H<sub>2</sub>O<sub>2</sub> + CH<sub>3</sub>(CH<sub>2</sub>)<sub>5</sub>CH(CH<sub>2</sub>)<sub>6</sub>CH<sub>3</sub>**

**TS56: HO<sub>2</sub> + CH<sub>3</sub>(CH<sub>2</sub>)<sub>12</sub>CH<sub>3</sub> → H<sub>2</sub>O<sub>2</sub> + CH<sub>3</sub>(CH<sub>2</sub>)<sub>5</sub>CH(CH<sub>2</sub>)<sub>6</sub>CH<sub>3</sub>**

|   |             |             |             |
|---|-------------|-------------|-------------|
| C | -6.15640300 | 5.32190900  | -0.78083900 |
| H | -5.62306300 | 5.73185700  | 0.08270900  |
| H | -5.81219500 | 5.86322900  | -1.66792400 |
| H | -7.21952600 | 5.54218700  | -0.64936700 |
| C | -5.90838400 | 3.81704100  | -0.92053600 |
| H | -6.29276600 | 3.29986800  | -0.03295300 |
| H | -6.48362300 | 3.42953400  | -1.77041600 |
| C | -4.42925900 | 3.46158000  | -1.10894000 |
| H | -4.04411900 | 3.97987500  | -1.99699100 |
| H | -3.85386600 | 3.84918200  | -0.25844300 |
| C | -4.17172400 | 1.95729000  | -1.24905600 |
| H | -4.74753500 | 1.56952000  | -2.09995700 |
| H | -4.55690000 | 1.44110100  | -0.36035900 |
| C | -2.69181700 | 1.60479200  | -1.43324500 |
| H | -2.11682800 | 1.98192100  | -0.58069500 |
| H | -2.30341600 | 2.11991500  | -2.32127200 |
| C | -2.44457800 | 0.09814500  | -1.57637300 |
| H | -3.01775500 | -0.28431300 | -2.43751600 |
| H | -2.84428300 | -0.42751000 | -0.69988400 |
| C | -0.99483800 | -0.28307900 | -1.76827300 |
| H | -0.41395900 | 0.07245000  | -0.60049100 |
| H | -0.44684500 | 0.37489400  | -2.45102500 |
| C | -0.67535100 | -1.74962700 | -1.94600800 |
| H | -1.22599600 | -2.11791800 | -2.82736800 |
| H | -1.08047500 | -2.31690900 | -1.09730700 |
| C | 0.81604400  | -2.06091900 | -2.12262900 |
| H | 1.36942900  | -1.68271200 | -1.25521900 |
| H | 1.19724200  | -1.50828200 | -2.99056600 |
| C | 1.10653300  | -3.55459100 | -2.30590700 |
| H | 0.54610900  | -3.93032500 | -3.17190700 |
| H | 0.72558800  | -4.10682800 | -1.43676400 |
| C | 2.59473600  | -3.87093700 | -2.49214300 |
| H | 3.15564800  | -3.49170300 | -1.62818900 |
| H | 2.97458700  | -3.32268100 | -3.36393500 |
| C | 2.88724700  | -5.36507400 | -2.66874100 |
| H | 2.32670700  | -5.74496900 | -3.53298500 |
| H | 2.50775300  | -5.91403700 | -1.79686600 |
| C | 4.37509700  | -5.68338900 | -2.85526900 |
| H | 4.93560300  | -5.30401100 | -1.99218800 |
| H | 4.75416300  | -5.13636200 | -3.72712600 |
| C | 4.65731400  | -7.17856700 | -3.02948500 |

|   |             |             |             |
|---|-------------|-------------|-------------|
| H | 4.13919900  | -7.57950900 | -3.90650700 |
| H | 5.72588200  | -7.37172500 | -3.15868900 |
| H | 4.31979700  | -7.74881200 | -2.15815600 |
| O | 0.04633800  | 0.35299300  | 0.46367900  |
| O | -0.76783700 | -0.32073600 | 1.40796200  |
| H | -0.23264200 | -1.09573700 | 1.63425400  |

## 2.2.15 C15 (*n*-C<sub>15</sub>H<sub>32</sub>)

**HO<sub>2</sub>-R57:** HO<sub>2</sub> + CH<sub>3</sub>(CH<sub>2</sub>)<sub>13</sub>CH<sub>3</sub> → H<sub>2</sub>O<sub>2</sub> + CH<sub>2</sub>(CH<sub>2</sub>)<sub>13</sub>CH<sub>3</sub>

**TS57:** HO<sub>2</sub> + CH<sub>3</sub>(CH<sub>2</sub>)<sub>13</sub>CH<sub>3</sub> → H<sub>2</sub>O<sub>2</sub> + CH<sub>2</sub>(CH<sub>2</sub>)<sub>13</sub>CH<sub>3</sub>

|   |             |             |             |
|---|-------------|-------------|-------------|
| C | -6.12298800 | 3.08140600  | -1.10927500 |
| H | -5.75721200 | 3.70918400  | -0.29489900 |
| H | -6.06907400 | 3.56929600  | -2.08245200 |
| H | -7.47914700 | 3.12493500  | -0.86712500 |
| C | -5.72349600 | 1.63094400  | -1.06352200 |
| H | -6.28186700 | 1.07082500  | -1.82326600 |
| H | -4.66480900 | 1.55657900  | -1.36459200 |
| C | -5.90359900 | 0.97157800  | 0.30987400  |
| H | -5.32375000 | 1.53109300  | 1.05502800  |
| H | -6.95292100 | 1.05659300  | 0.61223100  |
| C | -5.47868700 | -0.50049700 | 0.33457500  |
| H | -6.05967500 | -1.05655900 | -0.41251200 |
| H | -4.42807400 | -0.58304200 | 0.02595900  |
| C | -5.65628100 | -1.16247900 | 1.70539000  |
| H | -5.07497300 | -0.60739800 | 2.45309300  |
| H | -6.70616900 | -1.07654800 | 2.01301500  |
| C | -5.23919500 | -2.63736900 | 1.73402300  |
| H | -5.81863800 | -3.19137000 | 0.98409600  |
| H | -4.18803500 | -2.72291400 | 1.42888700  |
| C | -5.42279000 | -3.30025600 | 3.10369000  |
| H | -6.47407600 | -3.21460100 | 3.40770700  |
| H | -4.84445400 | -2.74575100 | 3.85418500  |
| C | -5.00675200 | -4.77547000 | 3.13447100  |
| H | -5.58335100 | -5.32949000 | 2.38231600  |
| H | -3.95453700 | -4.86129200 | 2.83322400  |
| C | -5.19552400 | -5.43807900 | 4.50359800  |
| H | -6.24782400 | -5.35175100 | 4.80414000  |
| H | -4.61942900 | -4.88369000 | 5.25590300  |
| C | -4.78066200 | -6.91357500 | 4.53668100  |
| H | -5.35555800 | -7.46786600 | 3.78340800  |
| H | -3.72770900 | -7.00036600 | 4.23836500  |
| C | -4.97362300 | -7.57472900 | 5.90596800  |
| H | -6.02651800 | -7.48674800 | 6.20396600  |

|   |             |              |             |
|---|-------------|--------------|-------------|
| H | -4.39857900 | -7.02038400  | 6.65909300  |
| C | -4.56087700 | -9.05074200  | 5.94163400  |
| H | -5.13522200 | -9.60520200  | 5.18802700  |
| H | -3.50751000 | -9.13934000  | 5.64527300  |
| C | -4.75690600 | -9.71018100  | 7.31115600  |
| H | -5.81007100 | -9.62082200  | 7.60842600  |
| H | -4.18176700 | -9.15689100  | 8.06522700  |
| C | -4.34707400 | -11.18689200 | 7.34961500  |
| H | -4.92215400 | -11.74027300 | 6.59710700  |
| H | -3.29470700 | -11.27712600 | 7.05344000  |
| C | -4.54716700 | -11.83566600 | 8.72236500  |
| H | -5.59671800 | -11.79363700 | 9.03050600  |
| H | -4.24512100 | -12.88676400 | 8.71618200  |
| H | -3.95748600 | -11.32530600 | 9.49057100  |
| O | -8.63006000 | 3.15437200   | -0.69732600 |
| O | -8.80601800 | 3.38747600   | 0.68946400  |
| H | -9.01125700 | 4.33360400   | 0.71832700  |

**HO<sub>2</sub>-R58: HO<sub>2</sub> + CH<sub>3</sub>(CH<sub>2</sub>)<sub>13</sub>CH<sub>3</sub> → H<sub>2</sub>O<sub>2</sub> + CH<sub>3</sub>CH(CH<sub>2</sub>)<sub>12</sub>CH<sub>3</sub>**

**TS58: HO<sub>2</sub> + CH<sub>3</sub>(CH<sub>2</sub>)<sub>13</sub>CH<sub>3</sub> → H<sub>2</sub>O<sub>2</sub> + CH<sub>3</sub>CH(CH<sub>2</sub>)<sub>12</sub>CH<sub>3</sub>**

|   |             |             |             |
|---|-------------|-------------|-------------|
| C | -5.16444800 | 3.10192500  | -2.33243500 |
| H | -4.18529700 | 3.60210900  | -2.33228600 |
| H | -5.59298800 | 3.21887500  | -3.33069700 |
| H | -5.80516600 | 3.63226900  | -1.62256300 |
| C | -5.01424900 | 1.64844300  | -1.95854400 |
| H | -6.25555800 | 1.14282900  | -2.12540100 |
| H | -4.46506900 | 1.05604600  | -2.69699100 |
| C | -4.65273100 | 1.32294500  | -0.52757000 |
| H | -3.68305600 | 1.79734300  | -0.30155700 |
| H | -5.37580500 | 1.79942900  | 0.14660900  |
| C | -4.56227500 | -0.17730500 | -0.22143900 |
| H | -5.52406300 | -0.65027900 | -0.45061300 |
| H | -3.82613900 | -0.63746600 | -0.89309500 |
| C | -4.18033800 | -0.47814600 | 1.23194500  |
| H | -3.22043400 | 0.00215400  | 1.46290000  |
| H | -4.91887100 | -0.01848200 | 1.90125300  |
| C | -4.08323600 | -1.97642700 | 1.54027200  |
| H | -5.04104900 | -2.45639900 | 1.30201700  |
| H | -3.34022500 | -2.43538900 | 0.87505200  |
| C | -3.71401900 | -2.28142400 | 2.99648700  |
| H | -4.45824200 | -1.82349800 | 3.66090600  |
| H | -2.75693500 | -1.79994300 | 3.23594900  |
| C | -3.61649600 | -3.77987800 | 3.30430100  |

|   |             |              |             |
|---|-------------|--------------|-------------|
| H | -4.57244400 | -4.26151600  | 3.06111100  |
| H | -2.86982300 | -4.23733600  | 2.64214900  |
| C | -3.25354100 | -4.08623000  | 4.76184900  |
| H | -4.00110100 | -3.62991200  | 5.42370200  |
| H | -2.29822500 | -3.60353300  | 5.00582200  |
| C | -3.15481400 | -5.58478100  | 5.06888200  |
| H | -4.10968500 | -6.06762500  | 4.82365800  |
| H | -2.40639800 | -6.04079400  | 4.40770700  |
| C | -2.79374300 | -5.89177700  | 6.52677500  |
| H | -3.54294800 | -5.43719100  | 7.18797200  |
| H | -1.83958400 | -5.40770000  | 6.77247800  |
| C | -2.69276600 | -7.39039400  | 6.83290300  |
| H | -3.64707700 | -7.87454700  | 6.58792900  |
| H | -1.94401000 | -7.84488600  | 6.17103700  |
| C | -2.33028400 | -7.69795900  | 8.29010600  |
| H | -3.07943100 | -7.24548700  | 8.95311200  |
| H | -1.37637800 | -7.21322500  | 8.53621200  |
| C | -2.22640200 | -9.19632700  | 8.59655300  |
| H | -3.17997700 | -9.68096100  | 8.35389700  |
| H | -1.47902700 | -9.64878000  | 7.93327300  |
| C | -1.85997300 | -9.49292600  | 10.05381600 |
| H | -2.60770200 | -9.08391500  | 10.74082700 |
| H | -1.79265500 | -10.56866000 | 10.23898100 |
| H | -0.89407100 | -9.04966400  | 10.31632100 |
| O | -7.36220000 | 0.72646300   | -2.26270200 |
| O | -7.78750000 | 1.20938800   | -3.52467000 |
| H | -7.66940000 | 0.43654200   | -4.09649000 |

**HO<sub>2</sub>-R59: HO<sub>2</sub> + CH<sub>3</sub>(CH<sub>2</sub>)<sub>13</sub>CH<sub>3</sub> → H<sub>2</sub>O<sub>2</sub> + H<sub>2</sub>+CH<sub>3</sub>CH<sub>2</sub>CH(CH<sub>2</sub>)<sub>11</sub>CH<sub>3</sub>**

**TS59: HO<sub>2</sub> + CH<sub>3</sub>(CH<sub>2</sub>)<sub>13</sub>CH<sub>3</sub> → H<sub>2</sub>O<sub>2</sub> + H<sub>2</sub>+CH<sub>3</sub>CH<sub>2</sub>CH(CH<sub>2</sub>)<sub>11</sub>CH<sub>3</sub>**

|   |             |             |             |
|---|-------------|-------------|-------------|
| C | -5.17116900 | 2.91897200  | -2.46574500 |
| H | -4.13819100 | 3.27485900  | -2.40271500 |
| H | -5.52446100 | 3.10144500  | -3.48382900 |
| H | -5.77717500 | 3.52134100  | -1.78492700 |
| C | -5.26529300 | 1.43185800  | -2.11116400 |
| H | -6.29901600 | 1.08431300  | -2.22445200 |
| H | -4.67403700 | 0.84408600  | -2.83184100 |
| C | -4.77773400 | 1.09676700  | -0.72001900 |
| H | -3.85234200 | 1.61017800  | -0.43772600 |
| H | -5.64923500 | 1.74216300  | 0.08873900  |
| C | -4.82958900 | -0.35055100 | -0.28896900 |
| H | -5.85504400 | -0.72786500 | -0.39920000 |
| H | -4.22699900 | -0.94277900 | -0.99745500 |

|   |             |              |             |
|---|-------------|--------------|-------------|
| C | -4.32418600 | -0.60957500  | 1.13575000  |
| H | -3.29264800 | -0.24551300  | 1.22192500  |
| H | -4.91418400 | -0.01473000  | 1.84295100  |
| C | -4.37438400 | -2.08709900  | 1.54035900  |
| H | -5.40527600 | -2.45380600  | 1.44922200  |
| H | -3.77993400 | -2.67776200  | 0.83118000  |
| C | -3.86966700 | -2.34858400  | 2.96376200  |
| H | -4.46751200 | -1.76158200  | 3.67296100  |
| H | -2.84082600 | -1.97720900  | 3.05587300  |
| C | -3.91103000 | -3.82626900  | 3.36968700  |
| H | -4.93900400 | -4.19945200  | 3.27341600  |
| H | -3.30873100 | -4.41227900  | 2.66332900  |
| C | -3.41187900 | -4.08495200  | 4.79562500  |
| H | -4.01607200 | -3.50038400  | 5.50155400  |
| H | -2.38502400 | -3.70912500  | 4.89275300  |
| C | -3.44910500 | -5.56247200  | 5.20261200  |
| H | -4.47518300 | -5.93961700  | 5.10185800  |
| H | -2.84138200 | -6.14659100  | 4.49930000  |
| C | -2.95541100 | -5.81881800  | 6.63087700  |
| H | -3.56497600 | -5.23637300  | 7.33395100  |
| H | -1.93038800 | -5.43912200  | 6.73252600  |
| C | -2.98886300 | -7.29638300  | 7.03815800  |
| H | -4.01340000 | -7.67693100  | 6.93430200  |
| H | -2.37705300 | -7.87859400  | 6.33677000  |
| C | -2.49876600 | -7.55143400  | 8.46767300  |
| H | -3.11094600 | -6.97022800  | 9.16978000  |
| H | -1.47430000 | -7.17065100  | 8.57288300  |
| C | -2.53064700 | -9.02861700  | 8.87658700  |
| H | -3.55397200 | -9.40938800  | 8.77194200  |
| H | -1.91787800 | -9.60969500  | 8.17655300  |
| C | -2.04030700 | -9.27213300  | 10.30679700 |
| H | -2.65675300 | -8.73323500  | 11.03339600 |
| H | -2.07378900 | -10.33396400 | 10.56643000 |
| H | -1.00770000 | -8.93159700  | 10.43421600 |
| O | -6.46750900 | 2.27894300   | 0.76889400  |
| O | -7.69725100 | 1.66681500   | 0.41995500  |
| H | -7.83608800 | 1.04210000   | 1.14709300  |

**HO<sub>2</sub>-R60: HO<sub>2</sub> + CH<sub>3</sub>(CH<sub>2</sub>)<sub>13</sub>CH<sub>3</sub> → H<sub>2</sub>O<sub>2</sub> + CH<sub>3</sub>(CH<sub>2</sub>)<sub>2</sub>CH(CH<sub>2</sub>)<sub>10</sub>CH<sub>3</sub>**

**TS60: HO<sub>2</sub> + CH<sub>3</sub>(CH<sub>2</sub>)<sub>13</sub>CH<sub>3</sub> → H<sub>2</sub>O<sub>2</sub> + CH<sub>3</sub>(CH<sub>2</sub>)<sub>2</sub>CH(CH<sub>2</sub>)<sub>10</sub>CH<sub>3</sub>**

|   |             |            |             |
|---|-------------|------------|-------------|
| C | -5.34325400 | 2.80417300 | -2.51379200 |
| H | -4.37934400 | 3.30485600 | -2.37512600 |
| H | -5.63032300 | 2.92232200 | -3.56209000 |

|   |             |              |             |
|---|-------------|--------------|-------------|
| H | -6.08273600 | 3.33577000   | -1.90670400 |
| C | -5.26720900 | 1.32597100   | -2.12310000 |
| H | -6.23337200 | 0.84515300   | -2.30330000 |
| H | -4.54401100 | 0.81298800   | -2.76848500 |
| C | -4.86663300 | 1.11654000   | -0.65736800 |
| H | -3.88798300 | 1.59355200   | -0.47906300 |
| H | -5.57241100 | 1.64195700   | -0.00132600 |
| C | -4.76947700 | -0.33129900  | -0.23369800 |
| H | -6.02928700 | -0.80882600  | -0.36119000 |
| H | -4.26218300 | -0.97143600  | -0.96404000 |
| C | -4.38507500 | -0.61861000  | 1.20025000  |
| H | -3.40187600 | -0.15723700  | 1.39069500  |
| H | -5.08248100 | -0.10686500  | 1.87584900  |
| C | -4.31687200 | -2.10944100  | 1.55397400  |
| H | -5.29268000 | -2.56828300  | 1.35817500  |
| H | -3.60145600 | -2.60510800  | 0.88502600  |
| C | -3.91518000 | -2.37183700  | 3.00948400  |
| H | -4.63076000 | -1.87366100  | 3.67614900  |
| H | -2.94053600 | -1.90703700  | 3.20795900  |
| C | -3.84747200 | -3.86134700  | 3.36472400  |
| H | -4.82028500 | -4.32577900  | 3.15787600  |
| H | -3.12680100 | -4.35897900  | 2.70271300  |
| C | -3.46153200 | -4.12927200  | 4.82384800  |
| H | -4.18236900 | -3.63109600  | 5.48504500  |
| H | -2.48851300 | -3.66559100  | 5.03208000  |
| C | -3.39773700 | -5.61930400  | 5.17795700  |
| H | -4.36961800 | -6.08308500  | 4.96479500  |
| H | -2.67382100 | -6.11692500  | 4.51953200  |
| C | -3.02008800 | -5.88941300  | 6.63889400  |
| H | -3.74421200 | -5.39195100  | 7.29710200  |
| H | -2.04820300 | -5.42593100  | 6.85277800  |
| C | -2.95757600 | -7.37978400  | 6.99198700  |
| H | -3.92944800 | -7.84310600  | 6.77760600  |
| H | -2.23325500 | -7.87721300  | 6.33383900  |
| C | -2.58092400 | -7.65116000  | 8.45273800  |
| H | -3.30496100 | -7.15443900  | 9.11192700  |
| H | -1.60877000 | -7.18853700  | 8.66813500  |
| C | -2.51819000 | -9.14135000  | 8.80669200  |
| H | -3.49001000 | -9.60353900  | 8.59449900  |
| H | -1.79582800 | -9.63832300  | 8.14760600  |
| C | -2.13808500 | -9.40162600  | 10.26734900 |
| H | -2.86191400 | -8.94707200  | 10.95132300 |
| H | -2.10118500 | -10.47230100 | 10.48709800 |

|   |             |             |             |
|---|-------------|-------------|-------------|
| H | -1.15492800 | -8.98057100 | 10.50074800 |
| O | -7.15078000 | -1.20889100 | -0.40961200 |
| O | -7.33573300 | -1.68123500 | -1.73210100 |
| H | -7.22405300 | -2.63823000 | -1.63307300 |

**HO<sub>2</sub>-R61: HO<sub>2</sub> + CH<sub>3</sub>(CH<sub>2</sub>)<sub>13</sub>CH<sub>3</sub> → H<sub>2</sub>O<sub>2</sub> + CH<sub>3</sub>(CH<sub>2</sub>)<sub>3</sub>CH(CH<sub>2</sub>)<sub>9</sub>CH<sub>3</sub>**

**TS61: HO<sub>2</sub> + CH<sub>3</sub>(CH<sub>2</sub>)<sub>13</sub>CH<sub>3</sub> → H<sub>2</sub>O<sub>2</sub> + CH<sub>3</sub>(CH<sub>2</sub>)<sub>3</sub>CH(CH<sub>2</sub>)<sub>9</sub>CH<sub>3</sub>**

|   |             |             |             |
|---|-------------|-------------|-------------|
| C | -5.07678300 | 2.77174200  | -2.49110500 |
| H | -4.04031700 | 3.11466300  | -2.41110700 |
| H | -5.40728400 | 2.95114500  | -3.51797200 |
| H | -5.68406500 | 3.39936900  | -1.83162700 |
| C | -5.20130400 | 1.29277900  | -2.11386800 |
| H | -6.24222000 | 0.97104300  | -2.23845500 |
| H | -4.60920600 | 0.68680600  | -2.81111800 |
| C | -4.75352700 | 0.99854000  | -0.67802100 |
| H | -3.71296200 | 1.32401500  | -0.54987300 |
| H | -5.35164100 | 1.59455500  | 0.01995300  |
| C | -4.86794700 | -0.48234100 | -0.29723300 |
| H | -5.90159700 | -0.82319700 | -0.43676800 |
| H | -4.26054300 | -1.08505700 | -0.99304300 |
| C | -4.42418600 | -0.79688400 | 1.11290700  |
| H | -3.51714700 | -0.26687900 | 1.42244400  |
| H | -5.33166000 | -0.15522500 | 1.88277600  |
| C | -4.46727800 | -2.24023800 | 1.55929900  |
| H | -5.48046500 | -2.63890600 | 1.41540800  |
| H | -3.82696300 | -2.82920900 | 0.88195800  |
| C | -4.01108200 | -2.46974900 | 3.00542600  |
| H | -4.64326000 | -1.88206100 | 3.68127700  |
| H | -2.99334400 | -2.07729300 | 3.12527100  |
| C | -4.03660600 | -3.94252000 | 3.42932200  |
| H | -5.05383300 | -4.33823300 | 3.31023600  |
| H | -3.40316500 | -4.52702200 | 2.74938000  |
| C | -3.57204300 | -4.16785600 | 4.87238600  |
| H | -4.20958100 | -3.58775300 | 5.55201400  |
| H | -2.55812400 | -3.76429100 | 4.99127000  |
| C | -3.58216700 | -5.63914300 | 5.30288600  |
| H | -4.59538800 | -6.04493100 | 5.18450800  |
| H | -2.94240000 | -6.21883200 | 4.62482800  |
| C | -3.11627000 | -5.85636600 | 6.74681400  |
| H | -3.75893400 | -5.27944000 | 7.42444700  |
| H | -2.10544400 | -5.44476000 | 6.86523300  |
| C | -3.11592000 | -7.32641200 | 7.18171200  |
| H | -4.12627900 | -7.73942900 | 7.06367100  |



|   |             |              |             |
|---|-------------|--------------|-------------|
| H | -2.47184000 | -7.90338600  | 6.50536100  |
| C | -2.64971500 | -7.53821500  | 8.62614200  |
| H | -3.29517500 | -6.96338000  | 9.30320100  |
| H | -1.64042000 | -7.12250600  | 8.74528000  |
| C | -2.64326300 | -9.00721600  | 9.06455900  |
| H | -3.65137100 | -9.42327400  | 8.94678700  |
| H | -1.99733400 | -9.58201200  | 8.38959900  |
| C | -2.17601200 | -9.20588700  | 10.50931200 |
| H | -2.82458700 | -8.67264900  | 11.21168500 |
| H | -2.18133400 | -10.26281300 | 10.79014800 |
| H | -1.15766600 | -8.82987500  | 10.65088500 |
| O | -6.18343700 | 0.38030900   | 2.52322500  |
| O | -7.40262000 | -0.15321600  | 2.03599700  |
| H | -7.62847600 | -0.81304700  | 2.70819400  |

**HO<sub>2</sub>-R62: HO<sub>2</sub> + CH<sub>3</sub>(CH<sub>2</sub>)<sub>13</sub>CH<sub>3</sub> → H<sub>2</sub>O<sub>2</sub> + CH<sub>3</sub>(CH<sub>2</sub>)<sub>4</sub>CH(CH<sub>2</sub>)<sub>8</sub>CH<sub>3</sub>**

**TS62: HO<sub>2</sub> + CH<sub>3</sub>(CH<sub>2</sub>)<sub>13</sub>CH<sub>3</sub> → H<sub>2</sub>O<sub>2</sub> + CH<sub>3</sub>(CH<sub>2</sub>)<sub>4</sub>CH(CH<sub>2</sub>)<sub>8</sub>CH<sub>3</sub>**

|   |             |             |             |
|---|-------------|-------------|-------------|
| C | -5.22405700 | 2.54727700  | -2.66966100 |
| H | -4.21478900 | 2.96727500  | -2.60952400 |
| H | -5.56089300 | 2.64158800  | -3.70582800 |
| H | -5.87775400 | 3.16993300  | -2.05058100 |
| C | -5.24666000 | 1.08841400  | -2.20438100 |
| H | -6.26138700 | 0.68652100  | -2.31017200 |
| H | -4.61112700 | 0.48507500  | -2.86416000 |
| C | -4.78335000 | 0.90676200  | -0.75477900 |
| H | -3.76559700 | 1.30594600  | -0.64862700 |
| H | -5.41780700 | 1.51350700  | -0.09556900 |
| C | -4.81338600 | -0.55092600 | -0.28312400 |
| H | -5.82948900 | -0.94715700 | -0.38073900 |
| H | -4.18256400 | -1.15885200 | -0.94441000 |
| C | -4.33962800 | -0.72995500 | 1.16446900  |
| H | -3.31104300 | -0.34308000 | 1.25979500  |
| H | -4.94913800 | -0.11130400 | 1.83531000  |
| C | -4.35218800 | -2.16103600 | 1.65173700  |
| H | -5.65744800 | -2.51628300 | 1.62187200  |
| H | -3.95699200 | -2.87796500 | 0.92348300  |
| C | -3.90570000 | -2.42711300 | 3.07156800  |
| H | -4.50161800 | -1.81885900 | 3.76404000  |
| H | -2.87009400 | -2.06440200 | 3.17971000  |
| C | -3.96737300 | -3.90230600 | 3.48779800  |
| H | -4.99692300 | -4.26125600 | 3.37734800  |
| H | -3.35651200 | -4.49585800 | 2.79526800  |
| C | -3.49392000 | -4.15473400 | 4.92323300  |

|   |             |              |             |
|---|-------------|--------------|-------------|
| H | -4.10438200 | -3.56022700  | 5.61501100  |
| H | -2.46405100 | -3.79196100  | 5.03738000  |
| C | -3.55986000 | -5.63077100  | 5.33189400  |
| H | -4.58898900 | -5.99214800  | 5.20883900  |
| H | -2.94574600 | -6.22422000  | 4.64196600  |
| C | -3.10213900 | -5.89637900  | 6.77042100  |
| H | -3.71559300 | -5.30281400  | 7.46056300  |
| H | -2.07199700 | -5.53839800  | 6.89556700  |
| C | -3.17671900 | -7.37412800  | 7.17161500  |
| H | -4.20647200 | -7.73139900  | 7.04102600  |
| H | -2.56097600 | -7.96697900  | 6.48264600  |
| C | -2.72785500 | -7.64716800  | 8.61139500  |
| H | -3.34254000 | -7.05432200  | 9.30142500  |
| H | -1.69706200 | -7.29315700  | 8.74378300  |
| C | -2.80755200 | -9.12535500  | 9.01009200  |
| H | -3.83741800 | -9.47864000  | 8.87757600  |
| H | -2.19279600 | -9.71797700  | 8.32155300  |
| C | -2.35908500 | -9.39023200  | 10.45029400 |
| H | -2.97876700 | -8.83952600  | 11.16516500 |
| H | -2.42702100 | -10.45233100 | 10.70196900 |
| H | -1.32128800 | -9.07814400  | 10.60498600 |
| O | -6.81474300 | -2.80039400  | 1.65837700  |
| O | -7.12570100 | -3.32180400  | 0.37872000  |
| H | -7.10111300 | -4.27854900  | 0.52760200  |

**HO<sub>2</sub>-R63: HO<sub>2</sub> + CH<sub>3</sub>(CH<sub>2</sub>)<sub>13</sub>CH<sub>3</sub> → H<sub>2</sub>O<sub>2</sub> + CH<sub>3</sub>(CH<sub>2</sub>)<sub>5</sub>CH(CH<sub>2</sub>)<sub>7</sub>CH<sub>3</sub>**

**TS63: HO<sub>2</sub> + CH<sub>3</sub>(CH<sub>2</sub>)<sub>13</sub>CH<sub>3</sub> → H<sub>2</sub>O<sub>2</sub> + CH<sub>3</sub>(CH<sub>2</sub>)<sub>5</sub>CH(CH<sub>2</sub>)<sub>7</sub>CH<sub>3</sub>**

|   |             |             |             |
|---|-------------|-------------|-------------|
| C | -5.06065800 | 0.81366900  | -3.32116200 |
| H | -3.97475600 | 0.90892700  | -3.42171500 |
| H | -5.48914100 | 0.82353400  | -4.32732400 |
| H | -5.42247600 | 1.70414000  | -2.79748600 |
| C | -5.43658700 | -0.46367100 | -2.56466800 |
| H | -6.52885000 | -0.54688700 | -2.50910700 |
| H | -5.09406700 | -1.33791300 | -3.13197600 |
| C | -4.85488000 | -0.52226500 | -1.14737300 |
| H | -3.76150000 | -0.43876700 | -1.20294500 |
| H | -5.19729000 | 0.35289400  | -0.58035500 |
| C | -5.22763300 | -1.79619000 | -0.38164200 |
| H | -6.32075100 | -1.87844700 | -0.32802800 |
| H | -4.88359300 | -2.67217000 | -0.94750800 |
| C | -4.64960300 | -1.84643100 | 1.03705400  |
| H | -3.55609300 | -1.76561700 | 0.98650800  |
| H | -4.99800300 | -0.97716300 | 1.60506900  |

|   |             |             |             |
|---|-------------|-------------|-------------|
| C | -5.02583100 | -3.12295800 | 1.79856100  |
| H | -6.11784800 | -3.22261400 | 1.83996200  |
| H | -4.66922300 | -4.00132200 | 1.23499600  |
| C | -4.46445800 | -3.20122100 | 3.19990100  |
| H | -5.07580500 | -2.18389600 | 3.84687100  |
| H | -3.42333800 | -2.87163700 | 3.28213300  |
| C | -4.78007700 | -4.43459300 | 4.01394200  |
| H | -5.86920600 | -4.56223400 | 4.07571600  |
| H | -4.41831400 | -5.31619400 | 3.45945900  |
| C | -4.16822300 | -4.44218700 | 5.42075300  |
| H | -4.50389500 | -3.55207700 | 5.96569700  |
| H | -3.07771900 | -4.35333000 | 5.33765800  |
| C | -4.51404500 | -5.69861500 | 6.22691200  |
| H | -5.60500700 | -5.78148600 | 6.31866100  |
| H | -4.18935800 | -6.58770600 | 5.67072800  |
| C | -3.88628000 | -5.72172300 | 7.62546200  |
| H | -4.20378200 | -4.82892700 | 8.17953000  |
| H | -2.79505700 | -5.64808000 | 7.53272900  |
| C | -4.24131200 | -6.97284100 | 8.43645500  |
| H | -5.33256900 | -7.04314100 | 8.53348300  |
| H | -3.92863000 | -7.86564500 | 7.87938200  |
| C | -3.60749300 | -7.00172900 | 9.83194400  |
| H | -3.91731900 | -6.10811000 | 10.38953500 |
| H | -2.51588600 | -6.93473700 | 9.73558900  |
| C | -3.96504300 | -8.25091500 | 10.64499600 |
| H | -5.05545700 | -8.31698300 | 10.74364400 |
| H | -3.65625700 | -9.14407600 | 10.08812400 |
| C | -3.32469800 | -8.27159000 | 12.03613000 |
| H | -3.64249700 | -7.40942800 | 12.63114200 |
| H | -3.59741000 | -9.17469900 | 12.58929200 |
| H | -2.23253200 | -8.24075000 | 11.96883800 |
| O | -5.67956400 | -1.31431800 | 4.39687600  |
| O | -7.04608400 | -1.64781900 | 4.22484400  |
| H | -7.27761600 | -2.03956000 | 5.07994300  |

**HO<sub>2</sub>-R64:** HO<sub>2</sub> + CH<sub>3</sub>(CH<sub>2</sub>)<sub>13</sub>CH<sub>3</sub> → H<sub>2</sub>O<sub>2</sub> + CH<sub>3</sub>(CH<sub>2</sub>)<sub>6</sub>CH(CH<sub>2</sub>)<sub>6</sub>CH<sub>3</sub>

**TS64:** HO<sub>2</sub> + CH<sub>3</sub>(CH<sub>2</sub>)<sub>13</sub>CH<sub>3</sub> → H<sub>2</sub>O<sub>2</sub> + CH<sub>3</sub>(CH<sub>2</sub>)<sub>6</sub>CH(CH<sub>2</sub>)<sub>6</sub>CH<sub>3</sub>

|   |             |             |             |
|---|-------------|-------------|-------------|
| C | -4.30091600 | 0.24318400  | -3.85127100 |
| H | -3.22718500 | 0.17507200  | -4.05349500 |
| H | -4.82048400 | 0.23816600  | -4.81362100 |
| H | -4.48651000 | 1.21327000  | -3.37922700 |
| C | -4.76963400 | -0.90712600 | -2.95551800 |
| H | -5.85250900 | -0.82999100 | -2.79918400 |

|   |             |             |             |
|---|-------------|-------------|-------------|
| H | -4.60508200 | -1.86136700 | -3.47094900 |
| C | -4.06546400 | -0.94203200 | -1.59427500 |
| H | -2.98144000 | -1.01924600 | -1.75142800 |
| H | -4.22940100 | 0.01392800  | -1.07975700 |
| C | -4.52909500 | -2.08916200 | -0.68998300 |
| H | -5.61208200 | -2.01069300 | -0.53105300 |
| H | -4.36682500 | -3.04461200 | -1.20583200 |
| C | -3.82161000 | -2.12329700 | 0.66949100  |
| H | -2.73784500 | -2.20304200 | 0.51114400  |
| H | -3.98370200 | -1.16747300 | 1.18436200  |
| C | -4.28991300 | -3.26857700 | 1.57334000  |
| H | -5.36837200 | -3.18608900 | 1.74324600  |
| H | -4.13308500 | -4.22494000 | 1.05802900  |
| C | -3.56586100 | -3.30293500 | 2.92530700  |
| H | -3.70529400 | -2.34704900 | 3.44598700  |
| H | -2.47989300 | -3.38797500 | 2.75150800  |
| C | -3.98471700 | -4.43519900 | 3.83489600  |
| H | -5.29105700 | -4.19720800 | 4.09557500  |
| H | -4.07807300 | -5.40028700 | 3.32458500  |
| C | -3.32205400 | -4.52358200 | 5.19126400  |
| H | -3.45768500 | -3.57541100 | 5.72713600  |
| H | -2.23453500 | -4.61864200 | 5.03568900  |
| C | -3.80660500 | -5.68833100 | 6.06328500  |
| H | -4.88699800 | -5.59290300 | 6.22030000  |
| H | -3.65398800 | -6.63071000 | 5.52143900  |
| C | -3.09948300 | -5.76520500 | 7.42109100  |
| H | -3.25277300 | -4.82223000 | 7.96138200  |
| H | -2.01653500 | -5.85225200 | 7.26292300  |
| C | -3.57821600 | -6.93054100 | 8.29385700  |
| H | -4.66149000 | -6.84435200 | 8.44858800  |
| H | -3.42262900 | -7.87412800 | 7.75468500  |
| C | -2.87871300 | -7.00647000 | 9.65571800  |
| H | -3.03517200 | -6.06368700 | 10.19605500 |
| H | -1.79480400 | -7.09147200 | 9.50258900  |
| C | -3.35668000 | -8.17195800 | 10.52899700 |
| H | -4.43979500 | -8.08823700 | 10.68049400 |
| H | -3.19753900 | -9.11459600 | 9.99116200  |
| C | -2.65565900 | -8.23645900 | 11.88919500 |
| H | -2.82584100 | -7.32128800 | 12.46517200 |
| H | -3.01854000 | -9.07699900 | 12.48730000 |
| H | -1.57381700 | -8.35536800 | 11.77157400 |
| O | -6.42201200 | -3.94648400 | 4.37668400  |
| O | -7.21309800 | -4.53828100 | 3.36166200  |

|   |             |             |            |
|---|-------------|-------------|------------|
| H | -7.51340800 | -5.35946600 | 3.77832400 |
|---|-------------|-------------|------------|

## 2.2.16 C16 (n-C<sub>16</sub>H<sub>34</sub>)

**HO<sub>2</sub>-R65:**  $\text{HO}_2 + \text{CH}_3(\text{CH}_2)_{14}\text{CH}_3 \rightarrow \text{H}_2\text{O}_2 + \text{CH}_2(\text{CH}_2)_{14}\text{CH}_3$

**TS65:**  $\text{HO}_2 + \text{CH}_3(\text{CH}_2)_{14}\text{CH}_3 \rightarrow \text{H}_2\text{O}_2 + \text{CH}_2(\text{CH}_2)_{14}\text{CH}_3$

|   |             |             |             |
|---|-------------|-------------|-------------|
| C | -4.72437400 | 6.69231600  | 0.47154600  |
| H | -5.69072300 | 5.91100600  | 1.06714900  |
| H | -3.99466800 | 6.75418600  | 1.28070900  |
| H | -5.27398300 | 7.62127400  | 0.31978000  |
| C | -4.28240900 | 5.96593700  | -0.77030200 |
| H | -5.14249600 | 5.81138700  | -1.43301700 |
| H | -3.59866200 | 6.62752600  | -1.32883900 |
| C | -3.58058000 | 4.62829600  | -0.50317800 |
| H | -2.71690900 | 4.80166500  | 0.15141000  |
| H | -4.25925300 | 3.97278700  | 0.05302800  |
| C | -3.11607800 | 3.92367500  | -1.78215000 |
| H | -3.98209200 | 3.74788600  | -2.43324100 |
| H | -2.44509500 | 4.58896600  | -2.34167600 |
| C | -2.40343800 | 2.59215500  | -1.52034800 |
| H | -1.54099700 | 2.76735700  | -0.86417000 |
| H | -3.07615800 | 1.92616200  | -0.96522300 |
| C | -1.93114500 | 1.88698100  | -2.79688900 |
| H | -2.79298300 | 1.71137700  | -3.45368100 |
| H | -1.25873100 | 2.55482700  | -3.35118200 |
| C | -1.21671600 | 0.55636000  | -2.53489700 |
| H | -0.36103500 | 0.73113700  | -1.86972600 |
| H | -1.89213100 | -0.11519300 | -1.98921800 |
| C | -0.72971600 | -0.14213600 | -3.80965800 |
| H | -1.58436700 | -0.31733500 | -4.47595700 |
| H | -0.05412300 | 0.53046700  | -4.35414800 |
| C | -0.01340700 | -1.47160600 | -3.54690500 |
| H | -0.69197400 | -2.14844100 | -3.01163400 |
| H | 0.83465100  | -1.29708500 | -2.87194800 |
| C | 0.48953300  | -2.16217500 | -4.81981200 |
| H | -0.35755400 | -2.33800800 | -5.49557500 |
| H | 1.16757400  | -1.48409900 | -5.35432900 |
| C | 1.20906700  | -3.48967500 | -4.55595100 |
| H | 0.52858400  | -4.17162700 | -4.02965100 |
| H | 2.05018100  | -3.31430300 | -3.87256600 |
| C | 1.72647500  | -4.17301900 | -5.82695100 |
| H | 0.88612200  | -4.35033100 | -6.51070500 |
| H | 2.40589400  | -3.48979900 | -6.35304800 |
| C | 2.44987900  | -5.49817400 | -5.56179400 |

|   |             |             |             |
|---|-------------|-------------|-------------|
| H | 1.76886800  | -6.18428000 | -5.04156300 |
| H | 3.28593800  | -5.32105600 | -4.87264300 |
| C | 2.97793800  | -6.17647800 | -6.83084600 |
| H | 2.14278800  | -6.35676800 | -7.52047000 |
| H | 3.65794200  | -5.48996900 | -7.35223200 |
| C | 3.70555100  | -7.49930600 | -6.56562200 |
| H | 3.02605200  | -8.18728900 | -6.04785700 |
| H | 4.53892000  | -7.31970500 | -5.87529100 |
| C | 4.23418300  | -8.16683700 | -7.83861000 |
| H | 4.75018500  | -9.10463100 | -7.61411100 |
| H | 3.42002300  | -8.39470300 | -8.53404300 |
| H | 4.94180100  | -7.51577000 | -8.36182400 |
| O | -6.53191300 | 5.26618200  | 1.54815700  |
| O | -5.88651200 | 4.45570500  | 2.51498700  |
| H | -6.08609500 | 4.91767900  | 3.34254600  |

**HO<sub>2</sub>-R66: HO<sub>2</sub> + CH<sub>3</sub>(CH<sub>2</sub>)<sub>14</sub>CH<sub>3</sub> → H<sub>2</sub>O<sub>2</sub> + CH<sub>3</sub>CH(CH<sub>2</sub>)<sub>13</sub>CH<sub>3</sub>**

**TS66: HO<sub>2</sub> + CH<sub>3</sub>(CH<sub>2</sub>)<sub>14</sub>CH<sub>3</sub> → H<sub>2</sub>O<sub>2</sub> + CH<sub>3</sub>CH(CH<sub>2</sub>)<sub>13</sub>CH<sub>3</sub>**

|   |             |             |             |
|---|-------------|-------------|-------------|
| C | -4.49888000 | 7.22611200  | 0.25443400  |
| H | -4.91798200 | 6.62898300  | 1.06904100  |
| H | -3.64022500 | 7.78120300  | 0.65860500  |
| H | -5.24944500 | 7.95866400  | -0.05167000 |
| C | -4.06794500 | 6.35615900  | -0.89993000 |
| H | -5.22711900 | 5.84510100  | -1.36786800 |
| H | -3.73918000 | 6.91874700  | -1.77931500 |
| C | -3.20585000 | 5.15417000  | -0.59118600 |
| H | -2.27411500 | 5.51209600  | -0.12152200 |
| H | -3.69998300 | 4.53840000  | 0.17096400  |
| C | -2.85298700 | 4.29298600  | -1.81065400 |
| H | -3.77606600 | 3.91777700  | -2.26725700 |
| H | -2.36986500 | 4.92360100  | -2.56802100 |
| C | -1.93327500 | 3.11431500  | -1.47347100 |
| H | -1.01002700 | 3.49418700  | -1.01656200 |
| H | -2.41355200 | 2.48673800  | -0.71182300 |
| C | -1.57717000 | 2.25078500  | -2.68881500 |
| H | -2.49936100 | 1.85597600  | -3.13400800 |
| H | -1.11540700 | 2.88330700  | -3.45819800 |
| C | -0.63353700 | 1.08789200  | -2.36157900 |
| H | 0.29095200  | 1.48588700  | -1.92325900 |
| H | -1.08961000 | 0.45756700  | -1.58721300 |
| C | -0.28390500 | 0.22208900  | -3.57731800 |
| H | -1.20645900 | -0.19523900 | -4.00117400 |
| H | 0.14852400  | 0.85827600  | -4.36065100 |

|   |             |             |             |
|---|-------------|-------------|-------------|
| C | 0.69031800  | -0.91872400 | -3.26238600 |
| H | 0.26459200  | -1.55243900 | -2.47353500 |
| H | 1.61554400  | -0.49833600 | -2.84718500 |
| C | 1.03172700  | -1.78663300 | -4.47899300 |
| H | 0.10897900  | -2.22529300 | -4.88040300 |
| H | 1.43469100  | -1.14781700 | -5.27580800 |
| C | 2.03456800  | -2.90577900 | -4.17670100 |
| H | 1.63716100  | -3.54268800 | -3.37567800 |
| H | 2.95926300  | -2.46467400 | -3.78237600 |
| C | 2.36936000  | -3.77499400 | -5.39422200 |
| H | 1.44686900  | -4.22903000 | -5.77878400 |
| H | 2.75048000  | -3.13474700 | -6.20056300 |
| C | 3.39230400  | -4.87837400 | -5.10154300 |
| H | 3.01439500  | -5.51782300 | -4.29308100 |
| H | 4.31574700  | -4.42287700 | -4.72085300 |
| C | 3.72382700  | -5.74786400 | -6.31949800 |
| H | 2.80207700  | -6.21031600 | -6.69624400 |
| H | 4.09455700  | -5.10778000 | -7.13101000 |
| C | 4.75626500  | -6.84392600 | -6.03268200 |
| H | 4.38660700  | -7.48516500 | -5.22304400 |
| H | 5.67732200  | -6.38188700 | -5.65678800 |
| C | 5.08125500  | -7.70572800 | -7.25630800 |
| H | 5.81738800  | -8.47847800 | -7.01757300 |
| H | 4.18520600  | -8.20687800 | -7.63616900 |
| H | 5.48950000  | -7.09878400 | -8.07075800 |
| O | -6.26229900 | 5.39697300  | -1.74936200 |
| O | -7.13121300 | 6.51014400  | -1.85921000 |
| H | -7.11883900 | 6.69394400  | -2.81016300 |

**HO<sub>2</sub>-R67: HO<sub>2</sub> + CH<sub>3</sub>(CH<sub>2</sub>)<sub>14</sub>CH<sub>3</sub> → H<sub>2</sub>O<sub>2</sub> + H<sub>2</sub>+CH<sub>3</sub>CH<sub>2</sub>CH(CH<sub>2</sub>)<sub>12</sub>CH<sub>3</sub>**

**TS67: HO<sub>2</sub> + CH<sub>3</sub>(CH<sub>2</sub>)<sub>14</sub>CH<sub>3</sub> → H<sub>2</sub>O<sub>2</sub> + H<sub>2</sub>+CH<sub>3</sub>CH<sub>2</sub>CH(CH<sub>2</sub>)<sub>12</sub>CH<sub>3</sub>**

|   |             |            |             |
|---|-------------|------------|-------------|
| C | -4.62795800 | 7.12684400 | -0.03958900 |
| H | -5.05424700 | 6.57983000 | 0.80457400  |
| H | -3.70863800 | 7.61214900 | 0.30268100  |
| H | -5.33295000 | 7.91195200 | -0.32443700 |
| C | -4.35054300 | 6.18593000 | -1.21589200 |
| H | -5.28860500 | 5.74182700 | -1.56938500 |
| H | -3.95798600 | 6.76657800 | -2.06631600 |
| C | -3.36361000 | 5.08374300 | -0.90477900 |
| H | -2.48847200 | 5.41802400 | -0.33740100 |
| H | -3.98797200 | 4.35447400 | 0.04796000  |
| C | -3.04077200 | 4.10003800 | -2.00478000 |
| H | -3.96903400 | 3.62910800 | -2.35546500 |

|   |             |             |             |
|---|-------------|-------------|-------------|
| H | -2.65894100 | 4.66303700  | -2.87243400 |
| C | -2.01827100 | 3.02383400  | -1.61677800 |
| H | -1.08143700 | 3.51051900  | -1.31765900 |
| H | -2.37685600 | 2.48676700  | -0.73078200 |
| C | -1.73356600 | 2.02331700  | -2.74163000 |
| H | -2.66997000 | 1.52743100  | -3.02949200 |
| H | -1.39276800 | 2.56537300  | -3.63338600 |
| C | -0.69297000 | 0.96061400  | -2.36874400 |
| H | 0.25059400  | 1.45535800  | -2.10471200 |
| H | -1.02196800 | 0.43380000  | -1.46369200 |
| C | -0.43485700 | -0.06064600 | -3.48165600 |
| H | -1.37748400 | -0.56335100 | -3.73463600 |
| H | -0.11967400 | 0.46675300  | -4.39141100 |
| C | 0.61828800  | -1.11473200 | -3.11947800 |
| H | 0.31349700  | -1.62962000 | -2.19911100 |
| H | 1.56684700  | -0.61384100 | -2.88642400 |
| C | 0.85152500  | -2.15118200 | -4.22386800 |
| H | -0.09610100 | -2.65827500 | -4.44751300 |
| H | 1.14406100  | -1.63555000 | -5.14785900 |
| C | 1.91464900  | -3.19918100 | -3.87355500 |
| H | 1.62942400  | -3.70750600 | -2.94329000 |
| H | 2.86609000  | -2.69369000 | -3.66310700 |
| C | 2.12989400  | -4.24363500 | -4.97414100 |
| H | 1.17927300  | -4.75349300 | -5.17775800 |
| H | 2.40576700  | -3.73425200 | -5.90667700 |
| C | 3.20028300  | -5.28772100 | -4.63466400 |
| H | 2.92893300  | -5.79341000 | -3.69878300 |
| H | 4.15316100  | -4.77900100 | -4.43879100 |
| C | 3.40439300  | -6.33575600 | -5.73381500 |
| H | 2.45247900  | -6.84777300 | -5.92651800 |
| H | 3.67104100  | -5.83017100 | -6.67127700 |
| C | 4.47853700  | -7.37825000 | -5.40173700 |
| H | 4.21358700  | -7.88295400 | -4.46455300 |
| H | 5.43052800  | -6.86739900 | -5.21210500 |
| C | 4.67165300  | -8.42199400 | -6.50557000 |
| H | 5.44286400  | -9.14961800 | -6.23765100 |
| H | 3.74535900  | -8.97394400 | -6.69408700 |
| H | 4.97218100  | -7.95100000 | -7.44694500 |
| O | -4.59185200 | 3.69657600  | 0.83807800  |
| O | -5.76716300 | 3.28991200  | 0.15859400  |
| H | -5.55954400 | 2.37880000  | -0.09648000 |



**HO<sub>2</sub>-R68: HO<sub>2</sub> + CH<sub>3</sub>(CH<sub>2</sub>)<sub>14</sub>CH<sub>3</sub> → H<sub>2</sub>O<sub>2</sub> + CH<sub>3</sub>(CH<sub>2</sub>)<sub>2</sub>CH(CH<sub>2</sub>)<sub>11</sub>CH<sub>3</sub>**

**TS68: HO<sub>2</sub> + CH<sub>3</sub>(CH<sub>2</sub>)<sub>14</sub>CH<sub>3</sub> → H<sub>2</sub>O<sub>2</sub> + CH<sub>3</sub>(CH<sub>2</sub>)<sub>2</sub>CH(CH<sub>2</sub>)<sub>11</sub>CH<sub>3</sub>**

|   |             |             |             |
|---|-------------|-------------|-------------|
| C | -4.82093400 | 7.01526800  | -0.00650000 |
| H | -5.36395700 | 6.45808500  | 0.76329700  |
| H | -3.95309800 | 7.48112800  | 0.47184300  |
| H | -5.47609600 | 7.81670000  | -0.35826600 |
| C | -4.39931700 | 6.09818800  | -1.15739600 |
| H | -5.28619800 | 5.66947600  | -1.63342300 |
| H | -3.89119900 | 6.68816400  | -1.92966600 |
| C | -3.47185500 | 4.96241800  | -0.70575800 |
| H | -2.56754500 | 5.39521400  | -0.24577200 |
| H | -3.95625300 | 4.38241900  | 0.09017400  |
| C | -3.03817600 | 4.02978600  | -1.81357500 |
| H | -4.18246300 | 3.42979800  | -2.21618900 |
| H | -2.77189800 | 4.54329100  | -2.74423700 |
| C | -2.09884300 | 2.90083800  | -1.45302000 |
| H | -1.17119400 | 3.34307000  | -1.05312600 |
| H | -2.52462600 | 2.31818100  | -0.62622200 |
| C | -1.74714700 | 1.96893800  | -2.61901100 |
| H | -2.66698400 | 1.50930700  | -2.99782200 |
| H | -1.33626400 | 2.56476700  | -3.44434700 |
| C | -0.74589900 | 0.87138100  | -2.24093800 |
| H | 0.18273400  | 1.33367600  | -1.88147700 |
| H | -1.14429700 | 0.29361000  | -1.39703800 |
| C | -0.42357400 | -0.08229000 | -3.39633500 |
| H | -1.35238100 | -0.55453300 | -3.74146200 |
| H | -0.04270000 | 0.49597100  | -4.24830200 |
| C | 0.59204900  | -1.17175400 | -3.03222300 |
| H | 0.22481500  | -1.73268200 | -2.16302800 |
| H | 1.53106800  | -0.70034500 | -2.71428300 |
| C | 0.87781600  | -2.14847900 | -4.17807100 |
| H | -0.06107700 | -2.62826000 | -4.48363800 |
| H | 1.22966200  | -1.58714600 | -5.05348900 |
| C | 1.90614700  | -3.22997100 | -3.82616200 |
| H | 1.56625000  | -3.77700000 | -2.93714400 |
| H | 2.85302100  | -2.75157700 | -3.54393700 |
| C | 2.16103200  | -4.22500300 | -4.96360300 |
| H | 1.21469500  | -4.71020000 | -5.23582700 |
| H | 2.48821500  | -3.67738000 | -5.85706700 |
| C | 3.19984300  | -5.29993600 | -4.62276100 |
| H | 2.88068400  | -5.83860800 | -3.72098600 |
| H | 4.15103600  | -4.81589000 | -4.36572100 |
| C | 3.43474800  | -6.30607200 | -5.75456500 |

|   |             |             |             |
|---|-------------|-------------|-------------|
| H | 2.48440800  | -6.79465200 | -6.00670000 |
| H | 3.74739800  | -5.76781900 | -6.65905700 |
| C | 4.47899000  | -7.37799800 | -5.42122000 |
| H | 4.16954600  | -7.91327500 | -4.51516500 |
| H | 5.43039300  | -6.89065300 | -5.17519600 |
| C | 4.69956500  | -8.38242800 | -6.55599700 |
| H | 5.44863500  | -9.13233800 | -6.28670400 |
| H | 3.77313100  | -8.91145300 | -6.80114900 |
| H | 5.04374400  | -7.88137500 | -7.46641900 |
| O | -5.18258600 | 2.86013200  | -2.52658100 |
| O | -5.79405000 | 3.66652300  | -3.51755700 |
| H | -5.53775000 | 3.22316000  | -4.33966700 |

**HO<sub>2</sub>-R69: HO<sub>2</sub> + CH<sub>3</sub>(CH<sub>2</sub>)<sub>14</sub>CH<sub>3</sub> → H<sub>2</sub>O<sub>2</sub> + CH<sub>3</sub>(CH<sub>2</sub>)<sub>3</sub>CH(CH<sub>2</sub>)<sub>10</sub>CH<sub>3</sub>**

**TS69: HO<sub>2</sub> + CH<sub>3</sub>(CH<sub>2</sub>)<sub>14</sub>CH<sub>3</sub> → H<sub>2</sub>O<sub>2</sub> + CH<sub>3</sub>(CH<sub>2</sub>)<sub>3</sub>CH(CH<sub>2</sub>)<sub>10</sub>CH<sub>3</sub>**

|   |             |             |             |
|---|-------------|-------------|-------------|
| C | -4.69167300 | 7.04399900  | 0.03776800  |
| H | -5.04956900 | 6.52109200  | 0.93001800  |
| H | -3.77287900 | 7.57265900  | 0.31102000  |
| H | -5.43985500 | 7.79524900  | -0.22999500 |
| C | -4.44555300 | 6.06509600  | -1.11371300 |
| H | -5.38930700 | 5.57671700  | -1.38463500 |
| H | -4.12357700 | 6.62090700  | -2.00330900 |
| C | -3.40301700 | 4.99247600  | -0.77941600 |
| H | -2.45728800 | 5.47878000  | -0.50686600 |
| H | -3.72754200 | 4.43120300  | 0.10363100  |
| C | -3.15174400 | 4.01179400  | -1.93072400 |
| H | -4.09475200 | 3.53149300  | -2.22093000 |
| H | -2.81868500 | 4.57239500  | -2.82027800 |
| C | -2.12143000 | 2.94780700  | -1.62899500 |
| H | -1.24022000 | 3.31909700  | -1.09521700 |
| H | -2.69332900 | 2.22258300  | -0.64167800 |
| C | -1.79986600 | 1.95321000  | -2.71988300 |
| H | -2.72532200 | 1.46292600  | -3.05083200 |
| H | -1.43935600 | 2.51056900  | -3.60026000 |
| C | -0.75532900 | 0.89803300  | -2.33289200 |
| H | 0.17439400  | 1.40326400  | -2.04229700 |
| H | -1.09896500 | 0.35925300  | -1.44214800 |
| C | -0.45943800 | -0.10300400 | -3.45438300 |
| H | -1.39117400 | -0.60671800 | -3.74381800 |
| H | -0.11982200 | 0.43931900  | -4.34644200 |
| C | 0.58676200  | -1.15788400 | -3.07506100 |
| H | 0.25418700  | -1.68844100 | -2.17351800 |
| H | 1.52452700  | -0.65673200 | -2.80254800 |

|   |             |             |             |
|---|-------------|-------------|-------------|
| C | 0.86114000  | -2.17570100 | -4.18724800 |
| H | -0.07865200 | -2.67405100 | -4.45877800 |
| H | 1.19429400  | -1.64608900 | -5.08926200 |
| C | 1.90292200  | -3.23578200 | -3.81005400 |
| H | 1.57566500  | -3.75630600 | -2.90063700 |
| H | 2.84784500  | -2.74030300 | -3.55195500 |
| C | 2.15711400  | -4.26503400 | -4.91658500 |
| H | 1.21057800  | -4.75803200 | -5.17385700 |
| H | 2.48447400  | -3.74509700 | -5.82632600 |
| C | 3.19507700  | -5.33002500 | -4.54280000 |
| H | 2.87132200  | -5.84523800 | -3.62906200 |
| H | 4.14476800  | -4.83911900 | -4.29335300 |
| C | 3.43635700  | -6.36481400 | -5.64691300 |
| H | 2.48624700  | -6.85519300 | -5.89651800 |
| H | 3.76065700  | -5.85054800 | -6.56116600 |
| C | 4.47197000  | -7.43318300 | -5.27650600 |
| H | 4.14932500  | -7.94577900 | -4.36201200 |
| H | 5.42260700  | -6.94431500 | -5.03050800 |
| C | 4.70143400  | -8.46448900 | -6.38502200 |
| H | 5.44385200  | -9.21112000 | -6.08950800 |
| H | 3.77561500  | -8.99508300 | -6.62908400 |
| H | 5.05877600  | -7.98600000 | -7.30246500 |
| O | -3.25859200 | 1.57752100  | 0.18764000  |
| O | -4.50808200 | 1.24367700  | -0.39168400 |
| H | -4.36847200 | 0.33104500  | -0.68471400 |

**HO<sub>2</sub>-R70: HO<sub>2</sub> + CH<sub>3</sub>(CH<sub>2</sub>)<sub>14</sub>CH<sub>3</sub> → H<sub>2</sub>O<sub>2</sub> + CH<sub>3</sub>(CH<sub>2</sub>)<sub>4</sub>CH(CH<sub>2</sub>)<sub>9</sub>CH<sub>3</sub>**

**TS70: HO<sub>2</sub> + CH<sub>3</sub>(CH<sub>2</sub>)<sub>14</sub>CH<sub>3</sub> → H<sub>2</sub>O<sub>2</sub> + CH<sub>3</sub>(CH<sub>2</sub>)<sub>4</sub>CH(CH<sub>2</sub>)<sub>9</sub>CH<sub>3</sub>**

|   |             |            |             |
|---|-------------|------------|-------------|
| C | -4.87527500 | 6.98150100 | -0.04161000 |
| H | -5.41255400 | 6.41984100 | 0.72913300  |
| H | -4.01190900 | 7.45509100 | 0.43676900  |
| H | -5.53732100 | 7.77754400 | -0.39373500 |
| C | -4.44038500 | 6.06637500 | -1.18985700 |
| H | -5.32706600 | 5.63493400 | -1.66939200 |
| H | -3.93730100 | 6.66186200 | -1.96149500 |
| C | -3.50985000 | 4.93271700 | -0.74300800 |
| H | -2.61636400 | 5.36389400 | -0.27172900 |
| H | -4.00974700 | 4.34290600 | 0.03624100  |
| C | -3.08830400 | 4.00344500 | -1.88564900 |
| H | -3.97791500 | 3.55651100 | -2.34151200 |
| H | -2.60303100 | 4.59348900 | -2.67377600 |
| C | -2.13571200 | 2.88724600 | -1.43792600 |
| H | -1.22087600 | 3.33716900 | -1.01732200 |

|   |             |             |             |
|---|-------------|-------------|-------------|
| H | -2.58812100 | 2.32000300  | -0.61456400 |
| C | -1.73118000 | 1.93379100  | -2.53920200 |
| H | -2.88055700 | 1.30315700  | -2.87300800 |
| H | -1.51698900 | 2.42642600  | -3.49424400 |
| C | -0.75463900 | 0.83240200  | -2.19244100 |
| H | 0.18930400  | 1.30225800  | -1.86958400 |
| H | -1.11982600 | 0.27871200  | -1.31817100 |
| C | -0.46254700 | -0.14201500 | -3.34016800 |
| H | -1.39676600 | -0.63137400 | -3.63761800 |
| H | -0.11877200 | 0.42523200  | -4.21490200 |
| C | 0.58215500  | -1.20664900 | -2.98649600 |
| H | 0.25527200  | -1.75130200 | -2.09136000 |
| H | 1.52597900  | -0.71554900 | -2.71579400 |
| C | 0.83718500  | -2.20674500 | -4.11926600 |
| H | -0.10531100 | -2.70866600 | -4.37329100 |
| H | 1.14310100  | -1.66159000 | -5.02180300 |
| C | 1.89775100  | -3.26224800 | -3.78480000 |
| H | 1.60528400  | -3.79183800 | -2.86881800 |
| H | 2.84761400  | -2.76192000 | -3.55570000 |
| C | 2.12028200  | -4.28155400 | -4.90742900 |
| H | 1.17188400  | -4.78971600 | -5.12490100 |
| H | 2.39755800  | -3.75131900 | -5.82787600 |
| C | 3.19278400  | -5.32928900 | -4.58700400 |
| H | 2.92385700  | -5.85064500 | -3.65907800 |
| H | 4.14524900  | -4.82236000 | -4.38460400 |
| C | 3.39608500  | -6.35921000 | -5.70342200 |
| H | 2.44516900  | -6.87158400 | -5.89992700 |
| H | 3.65692300  | -5.83823300 | -6.63407800 |
| C | 4.47526800  | -7.40272700 | -5.39202000 |
| H | 4.21765900  | -7.92079200 | -4.46010000 |
| H | 5.42692200  | -6.89159400 | -5.20150500 |
| C | 4.66438300  | -8.43112400 | -6.51089700 |
| H | 5.43961000  | -9.15974100 | -6.25770300 |
| H | 3.73859300  | -8.98353400 | -6.70051600 |
| H | 4.95716100  | -7.94688000 | -7.44798700 |
| O | -3.88511200 | 0.70933200  | -3.12010600 |
| O | -4.55972900 | 1.48148900  | -4.09723300 |
| H | -4.33497700 | 1.02464400  | -4.92121500 |

**HO<sub>2</sub>-R71:**  $\text{HO}_2 + \text{CH}_3(\text{CH}_2)_{14}\text{CH}_3 \rightarrow \text{H}_2\text{O}_2 + \text{CH}_3(\text{CH}_2)_5\text{CH}(\text{CH}_2)_8\text{CH}_3$

**TS71:**  $\text{HO}_2 + \text{CH}_3(\text{CH}_2)_{14}\text{CH}_3 \rightarrow \text{H}_2\text{O}_2 + \text{CH}_3(\text{CH}_2)_5\text{CH}(\text{CH}_2)_8\text{CH}_3$

|   |             |            |             |
|---|-------------|------------|-------------|
| C | -4.73688600 | 7.01317000 | -0.31482800 |
| H | -4.98548500 | 6.55735000 | 0.64880300  |

|   |             |             |             |
|---|-------------|-------------|-------------|
| H | -3.80891600 | 7.57853200  | -0.18239600 |
| H | -5.52864100 | 7.72715800  | -0.55843900 |
| C | -4.58585300 | 5.94990700  | -1.40658000 |
| H | -5.54006200 | 5.42565600  | -1.53966700 |
| H | -4.37177100 | 6.43861700  | -2.36511700 |
| C | -3.48624800 | 4.92502000  | -1.10534400 |
| H | -2.53165000 | 5.45001200  | -0.96859800 |
| H | -3.70259200 | 4.43550800  | -0.14706200 |
| C | -3.32415000 | 3.85587200  | -2.19108700 |
| H | -4.28057800 | 3.33642500  | -2.33207400 |
| H | -3.09747800 | 4.34308800  | -3.14876900 |
| C | -2.23492000 | 2.82660900  | -1.86976300 |
| H | -1.27847300 | 3.34443000  | -1.72155900 |
| H | -2.46936700 | 2.33333000  | -0.92026500 |
| C | -2.06374300 | 1.75857000  | -2.95641400 |
| H | -3.02140600 | 1.25326300  | -3.13481800 |
| H | -1.80307100 | 2.24579200  | -3.91079200 |
| C | -1.00466900 | 0.72657000  | -2.64295700 |
| H | -0.10135800 | 1.14180300  | -2.18352800 |
| H | -1.51379900 | 0.06997200  | -1.57685400 |
| C | -0.72415500 | -0.34070700 | -3.67544500 |
| H | -1.66143900 | -0.84518900 | -3.94562800 |
| H | -0.38450500 | 0.15356200  | -4.60059900 |
| C | 0.32479300  | -1.37311200 | -3.24205500 |
| H | -0.00801200 | -1.85497300 | -2.31541100 |
| H | 1.25784800  | -0.85172200 | -2.99348400 |
| C | 0.61239300  | -2.44417500 | -4.29970300 |
| H | -0.32242100 | -2.95714500 | -4.56141100 |
| H | 0.96234300  | -1.96261800 | -5.22203300 |
| C | 1.64628000  | -3.47947800 | -3.84216200 |
| H | 1.29157800  | -3.95691100 | -2.91959200 |
| H | 2.57865600  | -2.96483400 | -3.57607100 |
| C | 1.94885700  | -4.56180500 | -4.88456600 |
| H | 1.01558300  | -5.06899100 | -5.16201400 |
| H | 2.32157900  | -4.08865100 | -5.80225400 |
| C | 2.96531100  | -5.60264700 | -4.40134300 |
| H | 2.58856300  | -6.07420700 | -3.48439400 |
| H | 3.89637400  | -5.09410000 | -4.11899400 |
| C | 3.27925500  | -6.69051300 | -5.43437100 |
| H | 2.34834700  | -7.19567800 | -5.72380700 |
| H | 3.66683200  | -6.22247900 | -6.34877100 |
| C | 4.28512100  | -7.73530500 | -4.93783100 |
| H | 3.89650700  | -8.20326400 | -4.02509500 |

|   |             |             |             |
|---|-------------|-------------|-------------|
| H | 5.21483000  | -7.23084300 | -4.64736800 |
| C | 4.59650400  | -8.81973200 | -5.97346500 |
| H | 5.31490900  | -9.54791500 | -5.58657000 |
| H | 3.69176000  | -9.36585100 | -6.25904100 |
| H | 5.02141700  | -8.38660300 | -6.88459700 |
| O | -2.02428800 | -0.51259300 | -0.66866300 |
| O | -3.31618600 | -0.86388100 | -1.13280200 |
| H | -3.20793700 | -1.79518800 | -1.37614800 |

**HO<sub>2</sub>-R72: HO<sub>2</sub> + CH<sub>3</sub>(CH<sub>2</sub>)<sub>14</sub>CH<sub>3</sub> → H<sub>2</sub>O<sub>2</sub> + CH<sub>3</sub>(CH<sub>2</sub>)<sub>6</sub>CH(CH<sub>2</sub>)<sub>7</sub>CH<sub>3</sub>**

**TS72: HO<sub>2</sub> + CH<sub>3</sub>(CH<sub>2</sub>)<sub>14</sub>CH<sub>3</sub> → H<sub>2</sub>O<sub>2</sub> + CH<sub>3</sub>(CH<sub>2</sub>)<sub>6</sub>CH(CH<sub>2</sub>)<sub>7</sub>CH<sub>3</sub>**

|   |             |             |             |
|---|-------------|-------------|-------------|
| C | -5.14760400 | 6.73170300  | -0.09129100 |
| H | -5.70327000 | 6.19863000  | 0.68670200  |
| H | -4.28551600 | 7.20777000  | 0.38682900  |
| H | -5.79406900 | 7.52593200  | -0.47521800 |
| C | -4.70660400 | 5.77992400  | -1.20710800 |
| H | -5.59196800 | 5.34857600  | -1.68989100 |
| H | -4.18348900 | 6.34827600  | -1.98594900 |
| C | -3.79919200 | 4.64590500  | -0.71622000 |
| H | -2.91261400 | 5.07730200  | -0.23290500 |
| H | -4.32266000 | 4.07719800  | 0.06340400  |
| C | -3.35619800 | 3.68932200  | -1.82858400 |
| H | -4.24345900 | 3.25851300  | -2.30976000 |
| H | -2.83512000 | 4.25924600  | -2.60889700 |
| C | -2.44815800 | 2.55417000  | -1.34169100 |
| H | -1.55408800 | 2.98248400  | -0.86929300 |
| H | -2.96590100 | 1.98889400  | -0.55611300 |
| C | -2.02636900 | 1.59369100  | -2.45852500 |
| H | -2.91676400 | 1.15470600  | -2.92016900 |
| H | -1.51812500 | 2.15926400  | -3.25015900 |
| C | -1.10179600 | 0.46872700  | -1.97569900 |
| H | -0.19256300 | 0.91034900  | -1.53451100 |
| H | -1.58367900 | -0.08622700 | -1.16086100 |
| C | -0.67896900 | -0.49700000 | -3.05930900 |
| H | -1.82846600 | -1.09968900 | -3.44062400 |
| H | -0.40607400 | -0.01019900 | -4.00218600 |
| C | 0.24243200  | -1.63242700 | -2.67252700 |
| H | -0.21294300 | -2.21472200 | -1.86122700 |
| H | 1.16069500  | -1.19927000 | -2.24252800 |
| C | 0.62111800  | -2.56106100 | -3.83262600 |
| H | -0.29300400 | -2.98433300 | -4.26412500 |
| H | 1.09298100  | -1.96816600 | -4.62680300 |
| C | 1.56375500  | -3.69832000 | -3.42279800 |

|   |             |             |             |
|---|-------------|-------------|-------------|
| H | 1.08830800  | -4.29458300 | -2.63354200 |
| H | 2.47419800  | -3.27549300 | -2.97820300 |
| C | 1.94943400  | -4.61663400 | -4.58760600 |
| H | 1.03766000  | -5.03167100 | -5.03615000 |
| H | 2.43013900  | -4.02025200 | -5.37398800 |
| C | 2.88153400  | -5.76556100 | -4.18507800 |
| H | 2.39926100  | -6.36455800 | -3.40182600 |
| H | 3.79257400  | -5.35201700 | -3.73322400 |
| C | 3.26741600  | -6.67859400 | -5.35385400 |
| H | 2.35627500  | -7.08995300 | -5.80774900 |
| H | 3.75198600  | -6.08014700 | -6.13648300 |
| C | 4.19595800  | -7.83191300 | -4.95557000 |
| H | 3.71176100  | -8.43092600 | -4.17476500 |
| H | 5.10657600  | -7.42142900 | -4.50236800 |
| C | 4.57515100  | -8.73696200 | -6.13132400 |
| H | 5.23900600  | -9.54661900 | -5.81560200 |
| H | 3.68749100  | -9.19205300 | -6.58220700 |
| H | 5.08988100  | -8.17194100 | -6.91501900 |
| O | -2.83062800 | -1.68455600 | -3.71797900 |
| O | -3.49698400 | -0.88284100 | -4.67655500 |
| H | -3.26194100 | -1.31183800 | -5.51252200 |

## 4. Cartesian coordinates for all optimized geometries at the M06-2X/6-311++G(d,p) level

### 3.1 Hydrogen abstraction reaction of $n$ -C<sub>n</sub>H<sub>2n+2</sub> (n = 1-16) by OH radical

#### 3.1.1 C1 (CH<sub>4</sub>)

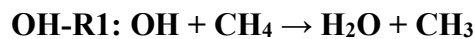

##### OH

|   |            |            |             |
|---|------------|------------|-------------|
| O | 0.00000000 | 0.00000000 | 0.10800100  |
| H | 0.00000000 | 0.00000000 | -0.86401200 |

##### H<sub>2</sub>O

|   |            |             |             |
|---|------------|-------------|-------------|
| O | 0.00000000 | 0.00000000  | 0.11657000  |
| H | 0.00000000 | 0.76160200  | -0.46627900 |
| H | 0.00000000 | -0.76160200 | -0.46627900 |

##### CH<sub>4</sub>

|   |             |             |             |
|---|-------------|-------------|-------------|
| C | 0.00000000  | 0.00000000  | 0.00000000  |
| H | 0.62889200  | 0.62889200  | 0.62889200  |
| H | -0.62889200 | -0.62889200 | 0.62889200  |
| H | -0.62889200 | 0.62889200  | -0.62889200 |
| H | 0.62889200  | -0.62889200 | -0.62889200 |

##### CH<sub>3</sub>

|   |             |             |             |
|---|-------------|-------------|-------------|
| C | 0.00000000  | 0.00000000  | 0.00006500  |
| H | 0.00000000  | 1.07889700  | -0.00013000 |
| H | -0.93435200 | -0.53944800 | -0.00013000 |
| H | 0.93435200  | -0.53944800 | -0.00013000 |

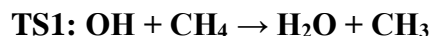

|   |             |             |             |
|---|-------------|-------------|-------------|
| C | 1.21668300  | 0.00903500  | 0.00048400  |
| H | 1.61595300  | -0.93574300 | -0.36159600 |
| H | 1.43845900  | 0.83359000  | -0.67238600 |
| H | 0.03428100  | -0.15106300 | 0.00406500  |
| H | 1.50593400  | 0.21749300  | 1.02741800  |
| O | -1.30868800 | -0.10901900 | 0.00005100  |
| H | -1.42522200 | 0.85365700  | -0.00081000 |

#### 3.1.2 C2 (C<sub>2</sub>H<sub>6</sub>)

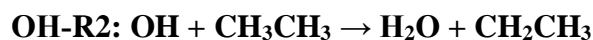

##### CH<sub>3</sub>CH<sub>3</sub>

|   |            |            |            |
|---|------------|------------|------------|
| C | 0.00000000 | 0.00000000 | 0.76355700 |
|---|------------|------------|------------|



|   |             |             |             |
|---|-------------|-------------|-------------|
| H | 0.50661500  | 0.88267500  | 1.15886400  |
| H | 0.51111200  | -0.88007900 | 1.15886400  |
| H | -1.01772700 | -0.00259700 | 1.15886400  |
| C | 0.00000000  | 0.00000000  | -0.76355700 |
| H | 1.01772700  | -0.00259700 | -1.15886400 |
| H | -0.51111200 | -0.88007900 | -1.15886400 |
| H | -0.50661500 | 0.88267500  | -1.15886400 |

### **CH<sub>2</sub>CH<sub>3</sub>**

|   |             |             |             |
|---|-------------|-------------|-------------|
| C | 0.69394200  | 0.00000000  | -0.00052900 |
| H | 1.08534200  | -0.00001100 | 1.02692500  |
| H | 1.10430600  | 0.88506600  | -0.49171800 |
| H | 1.10430700  | -0.88505500 | -0.49173600 |
| C | -0.79383800 | 0.00000000  | -0.02428000 |
| H | -1.34729000 | 0.92566200  | 0.05269000  |
| H | -1.34728900 | -0.92566300 | 0.05268900  |

### **TS2: OH + CH<sub>3</sub>CH<sub>3</sub> → H<sub>2</sub>O + CH<sub>2</sub>CH<sub>3</sub>**

|   |             |             |             |
|---|-------------|-------------|-------------|
| C | 1.44476100  | -0.47270600 | 0.02498200  |
| H | 1.21376400  | -1.12854100 | 0.86572300  |
| H | 2.47842200  | -0.13291600 | 0.13728500  |
| H | 1.38398600  | -1.06333900 | -0.89013900 |
| C | 0.49615700  | 0.70831300  | -0.02347200 |
| H | 0.49347300  | 1.29938300  | 0.89329100  |
| H | 0.64828500  | 1.35882500  | -0.88572200 |
| H | -0.58565400 | 0.29533100  | -0.15983400 |
| O | -1.88805800 | -0.27517600 | -0.08767100 |
| H | -2.17332500 | 0.15902200  | 0.73170000  |

### **3.1.3 C3 (C<sub>3</sub>H<sub>8</sub>)**

#### **OH-R3: OH + CH<sub>3</sub>CH<sub>2</sub>CH<sub>3</sub> → H<sub>2</sub>O + CH<sub>2</sub>CH<sub>2</sub>CH<sub>3</sub>**

#### **C<sub>3</sub>H<sub>8</sub>**

|   |             |             |             |
|---|-------------|-------------|-------------|
| C | 1.26630200  | -0.26115500 | 0.00000100  |
| H | 1.29782400  | -0.90642500 | -0.88222200 |
| H | 1.29820000  | -0.90584900 | 0.88263100  |
| H | 2.16899000  | 0.35336200  | -0.00039500 |
| C | 0.00000000  | 0.59262300  | 0.00000100  |
| H | 0.00000100  | 1.24800500  | 0.87618800  |
| H | -0.00000100 | 1.24793600  | -0.87623400 |
| C | -1.26630200 | -0.26115500 | 0.00000200  |
| H | -1.29806000 | -0.90605800 | 0.88248300  |
| H | -2.16899000 | 0.35336200  | -0.00010500 |
| H | -1.29796500 | -0.90621600 | -0.88237000 |

**CH<sub>2</sub>CH<sub>2</sub>CH<sub>3</sub>**

|   |             |             |             |
|---|-------------|-------------|-------------|
| C | -1.21854500 | -0.24535400 | -0.03866400 |
| H | -1.27015700 | -0.98436000 | 0.76485800  |
| H | -1.27357400 | -0.78035300 | -0.98921400 |
| H | -2.09471600 | 0.40081500  | 0.04076500  |
| C | 0.07853700  | 0.56002600  | 0.05292500  |
| H | 0.10510100  | 1.31949700  | -0.73579800 |
| H | 0.08212400  | 1.12354100  | 0.99898400  |
| C | 1.29434600  | -0.29585300 | -0.03262900 |
| H | 2.25404800  | 0.12175000  | -0.30604400 |
| H | 1.27114800  | -1.31380900 | 0.33666200  |

**TS3: OH + CH<sub>3</sub>CH<sub>2</sub>CH<sub>3</sub> → H<sub>2</sub>O + CH<sub>2</sub>CH<sub>2</sub>CH<sub>3</sub>**

|   |             |             |             |
|---|-------------|-------------|-------------|
| C | -1.38807700 | -0.90939700 | 0.17737000  |
| H | -1.71666000 | -0.77575800 | 1.21137200  |
| H | -0.53238100 | -1.58826800 | 0.18134500  |
| H | -2.20158400 | -1.38239900 | -0.37561600 |
| C | -0.99483500 | 0.42958100  | -0.44174800 |
| H | -0.70780600 | 0.28420600  | -1.48751800 |
| H | -1.85667400 | 1.10702700  | -0.44910300 |
| C | 0.14496400  | 1.08846200  | 0.31034000  |
| H | 1.04941100  | 0.35023800  | 0.31375700  |
| H | 0.49786800  | 2.01835800  | -0.13766600 |
| H | -0.06919500 | 1.23849800  | 1.37113700  |
| O | 2.07149500  | -0.59383000 | -0.01121600 |
| H | 2.39275300  | -0.15313800 | -0.81374600 |

**OH-R4: OH + CH<sub>3</sub>CH<sub>2</sub>CH<sub>3</sub> → H<sub>2</sub>O + CH<sub>3</sub>CHCH<sub>3</sub>**

|   |             |             |             |
|---|-------------|-------------|-------------|
| C | 1.28955300  | -0.20046500 | 0.00399700  |
| H | 1.30120100  | -1.02183500 | -0.72132100 |
| H | 1.45214100  | -0.65876500 | 0.99127700  |
| H | 2.14435000  | 0.44591400  | -0.19992500 |
| C | 0.00000000  | 0.54352300  | -0.05033500 |
| H | -0.00000100 | 1.61381000  | 0.11399100  |
| C | -1.28955300 | -0.20046500 | 0.00399600  |
| H | -1.45215600 | -0.65874100 | 0.99128600  |
| H | -2.14434800 | 0.44590800  | -0.19995300 |
| H | -1.30118800 | -1.02185200 | -0.72130200 |

**TS4: OH + CH<sub>3</sub>CH<sub>2</sub>CH<sub>3</sub> → H<sub>2</sub>O + CH<sub>3</sub>CHCH<sub>3</sub>**

|   |            |            |             |
|---|------------|------------|-------------|
| C | 0.96002200 | 1.27759100 | -0.13807200 |
| H | 0.86986500 | 1.29894500 | -1.22656600 |

|   |             |             |             |
|---|-------------|-------------|-------------|
| H | 0.46625800  | 2.16490500  | 0.26108900  |
| H | 2.02414600  | 1.33981400  | 0.11174200  |
| C | 0.35997700  | 0.00039000  | 0.42342600  |
| H | -0.74974300 | -0.00871200 | 0.12337000  |
| H | 0.36997900  | 0.00155700  | 1.51700600  |
| C | 0.97623400  | -1.27048100 | -0.13493900 |
| H | 0.49257000  | -2.16272600 | 0.26544300  |
| H | 0.88775100  | -1.29494500 | -1.22352300 |
| H | 2.04075900  | -1.31909100 | 0.11628800  |
| O | -2.20654500 | -0.01303900 | -0.19579200 |
| H | -2.52662400 | 0.03955800  | 0.71900200  |

### 3.1.4 C4 (*n*-C<sub>4</sub>H<sub>10</sub>)

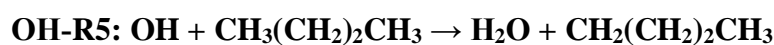

#### *n*-C<sub>4</sub>H<sub>10</sub>

|   |             |             |             |
|---|-------------|-------------|-------------|
| C | -1.94913700 | 0.11990400  | 0.00006500  |
| H | -2.08746800 | 0.75066200  | -0.88229600 |
| H | -2.08755700 | 0.75008100  | 0.88282500  |
| H | -2.73888400 | -0.63424800 | -0.00022600 |
| C | -0.56178600 | -0.51694100 | -0.00007100 |
| H | -0.45277700 | -1.16550700 | 0.87655500  |
| H | -0.45287800 | -1.16535900 | -0.87681800 |
| C | 0.56178600  | 0.51694100  | -0.00007100 |
| H | 0.45277500  | 1.16550800  | 0.87655400  |
| H | 0.45288000  | 1.16535800  | -0.87681900 |
| C | 1.94913700  | -0.11990400 | 0.00006500  |
| H | 2.08749400  | -0.75060400 | -0.88233400 |
| H | 2.73888400  | 0.63424800  | -0.00015100 |
| H | 2.08753100  | -0.75014000 | 0.88278800  |

#### CH<sub>2</sub>(CH<sub>2</sub>)<sub>2</sub>CH<sub>3</sub>

|   |             |             |             |
|---|-------------|-------------|-------------|
| C | 1.87880700  | -0.13045500 | 0.01867600  |
| H | 2.01272100  | -0.86326100 | -0.78142200 |
| H | 2.00271800  | -0.65258100 | 0.97116400  |
| H | 2.67905900  | 0.60721000  | -0.06593600 |
| C | 0.50319000  | 0.52392000  | -0.06829600 |
| H | 0.39184700  | 1.26416500  | 0.73117000  |
| H | 0.40658900  | 1.06927600  | -1.01218600 |
| C | -0.63601800 | -0.49340800 | 0.03605000  |
| H | -0.51283800 | -1.05668400 | 0.97616200  |
| H | -0.53735700 | -1.23817100 | -0.76242800 |
| C | -1.98621100 | 0.13170200  | -0.01279700 |
| H | -2.85760100 | -0.43764600 | -0.30695900 |

|   |             |            |            |
|---|-------------|------------|------------|
| H | -2.14374400 | 1.11713500 | 0.40863700 |
|---|-------------|------------|------------|

**TS5: OH + CH<sub>3</sub>(CH<sub>2</sub>)<sub>2</sub>CH<sub>3</sub> → H<sub>2</sub>O + CH<sub>2</sub>(CH<sub>2</sub>)<sub>2</sub>CH<sub>3</sub>**

|   |             |             |             |
|---|-------------|-------------|-------------|
| C | 0.98022200  | 0.86912500  | 0.00289100  |
| H | 1.02531900  | 1.40872900  | 0.95090900  |
| H | 0.94915100  | 1.57676300  | -0.82849900 |
| H | 2.01522900  | 0.34112500  | -0.12126500 |
| C | -0.13102400 | -0.16011100 | -0.05141800 |
| H | -0.05984000 | -0.72761600 | -0.98476000 |
| H | -0.01241600 | -0.88357300 | 0.76304100  |
| C | -1.51919900 | 0.47832000  | 0.04951900  |
| H | -1.63939500 | 1.20470500  | -0.76098800 |
| H | -1.58769100 | 1.04369800  | 0.98495100  |
| C | -2.63857400 | -0.55757300 | -0.01283100 |
| H | -2.54508500 | -1.28103900 | 0.80128200  |
| H | -3.62142800 | -0.08916100 | 0.06630400  |
| H | -2.60432600 | -1.11113600 | -0.95455800 |
| O | 3.12979400  | -0.53408700 | -0.07439200 |
| H | 2.89358000  | -0.98836900 | 0.74975900  |

**OH-R6: OH + CH<sub>3</sub>(CH<sub>2</sub>)<sub>2</sub>CH<sub>3</sub> → H<sub>2</sub>O + CH<sub>3</sub>CHCH<sub>2</sub>CH<sub>3</sub>**

**CH<sub>3</sub>CHCH<sub>2</sub>CH<sub>3</sub>**

|   |             |             |             |
|---|-------------|-------------|-------------|
| C | -1.92830400 | 0.16594000  | -0.06554900 |
| H | -2.00242700 | 0.68707600  | -1.02266100 |
| H | -2.07778400 | 0.90201300  | 0.72827400  |
| H | -2.74155700 | -0.55974200 | -0.00866600 |
| C | -0.56506500 | -0.50893300 | 0.07603100  |
| H | -0.53475900 | -1.07201600 | 1.02340900  |
| H | -0.43719600 | -1.26584300 | -0.70893200 |
| C | 0.57413500  | 0.45204800  | 0.02382600  |
| H | 0.39065300  | 1.48465100  | 0.30222900  |
| C | 1.97660600  | -0.04412100 | -0.05242000 |
| H | 2.08716000  | -0.79573900 | -0.84167500 |
| H | 2.68556200  | 0.76169200  | -0.24772300 |
| H | 2.28611400  | -0.53169400 | 0.88441600  |

**TS6: OH + CH<sub>3</sub>(CH<sub>2</sub>)<sub>2</sub>CH<sub>3</sub> → H<sub>2</sub>O + CH<sub>3</sub>CHCH<sub>2</sub>CH<sub>3</sub>**

|   |             |             |             |
|---|-------------|-------------|-------------|
| C | -1.81301800 | -0.96272200 | -0.04103300 |
| H | -1.82942800 | -2.02319300 | 0.23068200  |
| H | -1.95240600 | -0.89198100 | -1.12217000 |
| H | -2.66063400 | -0.47618600 | 0.44381600  |
| C | -0.49528100 | -0.33268000 | 0.37344400  |
| H | -0.54244600 | 0.77707800  | 0.06801100  |

|   |             |             |             |
|---|-------------|-------------|-------------|
| H | -0.37638700 | -0.32870600 | 1.46223400  |
| C | 0.73187800  | -0.92240100 | -0.30157000 |
| H | 0.59690900  | -0.87891700 | -1.38712700 |
| H | 0.79685700  | -1.98566400 | -0.03839500 |
| C | 2.02121500  | -0.20762400 | 0.09214300  |
| H | 2.17192800  | -0.24475300 | 1.17471700  |
| H | 2.89241300  | -0.66278400 | -0.38217000 |
| H | 1.98090400  | 0.84155600  | -0.21047200 |
| O | -0.45901800 | 2.24141500  | -0.20350300 |
| H | -0.07432800 | 2.49478900  | 0.65099000  |

### 3.1.5 C5 (*n*-C<sub>5</sub>H<sub>12</sub>)

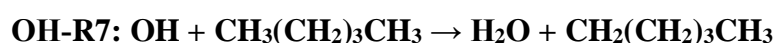

#### *n*-C<sub>5</sub>H<sub>12</sub>

|   |             |             |             |
|---|-------------|-------------|-------------|
| C | 2.54053900  | -0.32850200 | -0.00000500 |
| H | 2.57219600  | -0.97317400 | -0.88251100 |
| H | 2.57222500  | -0.97314000 | 0.88252300  |
| H | 3.44376400  | 0.28516500  | -0.00003300 |
| C | 1.27623300  | 0.52766200  | 0.00000000  |
| H | 1.27462900  | 1.18434100  | 0.87696700  |
| H | 1.27461600  | 1.18432900  | -0.87697500 |
| C | 0.00000000  | -0.31090800 | 0.00001200  |
| H | 0.00000100  | -0.96974400 | 0.87746400  |
| H | -0.00000100 | -0.96976800 | -0.87742200 |
| C | -1.27623300 | 0.52766200  | 0.00000100  |
| H | -1.27461600 | 1.18433200  | -0.87697300 |
| H | -1.27462900 | 1.18433800  | 0.87697000  |
| C | -2.54053900 | -0.32850200 | -0.00000600 |
| H | -2.57221700 | -0.97315500 | 0.88251300  |
| H | -3.44376400 | 0.28516500  | -0.00001400 |
| H | -2.57220400 | -0.97316000 | -0.88252100 |

#### CH<sub>2</sub>(CH<sub>2</sub>)<sub>3</sub>CH<sub>3</sub>

|   |             |             |             |
|---|-------------|-------------|-------------|
| C | -2.58001500 | -0.34646500 | -0.02517600 |
| H | -2.58112200 | -1.34047800 | 0.40498300  |
| H | -3.52683900 | 0.06754500  | -0.34465900 |
| C | -1.34956000 | 0.49014800  | 0.02506700  |
| H | -1.35785400 | 1.21617200  | -0.79636900 |
| H | -1.33844000 | 1.09455500  | 0.94711800  |
| C | -0.06060700 | -0.33269100 | -0.02973700 |
| H | -0.05254200 | -0.92631200 | -0.95087600 |
| H | -0.05730000 | -1.04931600 | 0.80040100  |
| C | 1.20035800  | 0.52503500  | 0.03590700  |

|   |            |             |             |
|---|------------|-------------|-------------|
| H | 1.18684300 | 1.11643100  | 0.95796600  |
| H | 1.18959200 | 1.24292000  | -0.79146700 |
| C | 2.47763500 | -0.30894000 | -0.02391300 |
| H | 2.51796100 | -0.89047800 | -0.94866300 |
| H | 3.37026600 | 0.31836500  | 0.01670900  |
| H | 2.52256300 | -1.01192400 | 0.81196600  |

**TS7: OH + CH<sub>3</sub>(CH<sub>2</sub>)<sub>3</sub>CH<sub>3</sub> → H<sub>2</sub>O + CH<sub>2</sub>(CH<sub>2</sub>)<sub>3</sub>CH<sub>3</sub>**

|   |             |             |             |
|---|-------------|-------------|-------------|
| C | -1.62508700 | 0.85783700  | -0.01069700 |
| H | -1.58982000 | 1.56301600  | -0.84403000 |
| H | -1.65283100 | 1.40110700  | 0.93587100  |
| H | -2.66901800 | 0.34605700  | -0.12448900 |
| C | -0.53053900 | -0.18896400 | -0.07163600 |
| H | -0.65973700 | -0.91395200 | 0.73954900  |
| H | -0.61317800 | -0.75036300 | -1.00756500 |
| C | 0.86646200  | 0.42867900  | 0.02917600  |
| H | 0.95365200  | 0.97816100  | 0.97426900  |
| H | 0.99438200  | 1.16807100  | -0.77038500 |
| C | 1.98321800  | -0.60924700 | -0.05918200 |
| H | 1.89684000  | -1.14796400 | -1.00882200 |
| H | 1.84640900  | -1.35426300 | 0.73210500  |
| C | 3.37141300  | 0.01535800  | 0.05498200  |
| H | 3.49097100  | 0.52619100  | 1.01397000  |
| H | 4.15760900  | -0.73797400 | -0.02398600 |
| H | 3.53237900  | 0.75241200  | -0.73603700 |
| O | -3.81121800 | -0.49192500 | -0.04223200 |
| H | -3.59072100 | -0.91707500 | 0.80154500  |

**OH-R8: OH + CH<sub>3</sub>(CH<sub>2</sub>)<sub>3</sub>CH<sub>3</sub> → H<sub>2</sub>O + CH<sub>3</sub>CH(CH<sub>2</sub>)<sub>2</sub>CH<sub>3</sub>**  
**CH<sub>3</sub>CH(CH<sub>2</sub>)<sub>2</sub>CH<sub>3</sub>**

|   |             |             |             |
|---|-------------|-------------|-------------|
| C | 2.59741700  | -0.22868900 | -0.08508400 |
| H | 2.57519700  | -0.94230600 | -0.91600200 |
| H | 2.85538700  | -0.80856000 | 0.81382800  |
| H | 3.41182700  | 0.47520600  | -0.26215100 |
| C | 1.28585900  | 0.46249900  | 0.06185500  |
| H | 1.26633300  | 1.49774000  | 0.38646400  |
| C | 0.01790400  | -0.31923700 | 0.12203400  |
| H | -0.06905700 | -0.82778800 | 1.09818800  |
| H | 0.05178500  | -1.12853500 | -0.62037400 |
| C | -1.23532500 | 0.52798900  | -0.10139800 |
| H | -1.16573800 | 1.01090300  | -1.08117600 |
| H | -1.25769800 | 1.33334500  | 0.64053200  |
| C | -2.51959900 | -0.29120600 | -0.01265300 |

|   |             |             |             |
|---|-------------|-------------|-------------|
| H | -2.61951700 | -0.75469800 | 0.97247900  |
| H | -3.40250200 | 0.32799600  | -0.18275100 |
| H | -2.52354700 | -1.09143600 | -0.75756400 |

**TS8: OH + CH<sub>3</sub>(CH<sub>2</sub>)<sub>3</sub>CH<sub>3</sub> → H<sub>2</sub>O + CH<sub>3</sub>CH(CH<sub>2</sub>)<sub>2</sub>CH<sub>3</sub>**

|   |             |             |             |
|---|-------------|-------------|-------------|
| C | 2.09777000  | -1.32533900 | -0.13487500 |
| H | 2.14530100  | -1.28215100 | -1.22530600 |
| H | 1.90148000  | -2.36356500 | 0.15158500  |
| H | 3.07528900  | -1.04411800 | 0.25954900  |
| C | 1.00107700  | -0.41620100 | 0.39121700  |
| H | 0.98935300  | -0.39359200 | 1.48604800  |
| H | 1.27334700  | 0.65459700  | 0.06730600  |
| C | -0.38384000 | -0.70695200 | -0.16034800 |
| H | -0.66659600 | -1.73183400 | 0.11714900  |
| H | -0.34806500 | -0.68161300 | -1.25568800 |
| C | -1.44851400 | 0.26714700  | 0.33804600  |
| H | -1.16414500 | 1.28051900  | 0.03631000  |
| H | -1.46186800 | 0.25456700  | 1.43385200  |
| C | -2.83981200 | -0.05996200 | -0.19728000 |
| H | -3.15111200 | -1.06166000 | 0.11053100  |
| H | -3.58574100 | 0.64934900  | 0.16638500  |
| H | -2.85202100 | -0.02878900 | -1.28969700 |
| O | 1.50997700  | 2.09284100  | -0.25854100 |
| H | 1.20487300  | 2.45340100  | 0.58974200  |

**OH-R9: OH + CH<sub>3</sub>(CH<sub>2</sub>)<sub>3</sub>CH<sub>3</sub> → H<sub>2</sub>O + CH<sub>3</sub>CH<sub>2</sub>CHCH<sub>2</sub>CH<sub>3</sub>  
CH<sub>3</sub>CH<sub>2</sub>CHCH<sub>2</sub>CH<sub>3</sub>**

|   |             |             |             |
|---|-------------|-------------|-------------|
| C | -2.50695500 | -0.40190700 | 0.06557100  |
| H | -2.44724400 | -1.03762600 | 0.95186000  |
| H | -2.54933200 | -1.05307200 | -0.81102300 |
| H | -3.44109100 | 0.16061100  | 0.11240400  |
| C | -1.29733400 | 0.52798700  | -0.01394600 |
| H | -1.40705200 | 1.19397300  | -0.88552500 |
| H | -1.28156200 | 1.19752000  | 0.85605000  |
| C | 0.00000000  | -0.20230300 | -0.09870000 |
| H | 0.00000000  | -1.22195200 | -0.47483400 |
| C | 1.29733400  | 0.52798700  | -0.01394600 |
| H | 1.28156200  | 1.19752100  | 0.85605000  |
| H | 1.40705200  | 1.19397300  | -0.88552600 |
| C | 2.50695500  | -0.40190700 | 0.06557100  |
| H | 2.54933200  | -1.05307200 | -0.81102200 |
| H | 3.44109100  | 0.16061100  | 0.11240300  |
| H | 2.44724400  | -1.03762600 | 0.95186000  |

**TS9: OH + CH<sub>3</sub>(CH<sub>2</sub>)<sub>3</sub>CH<sub>3</sub> → H<sub>2</sub>O + CH<sub>3</sub>CH<sub>2</sub>CHCH<sub>2</sub>CH<sub>3</sub>**

|   |             |             |             |
|---|-------------|-------------|-------------|
| C | 2.53202900  | -0.25604500 | -0.30884200 |
| H | 2.50797900  | 0.83517100  | -0.35740800 |
| H | 2.59120300  | -0.63473900 | -1.33230300 |
| H | 3.44171400  | -0.55718600 | 0.21374200  |
| C | 1.28385500  | -0.78565300 | 0.39235800  |
| H | 1.31192800  | -1.88134300 | 0.43407700  |
| H | 1.26612000  | -0.44254000 | 1.43350600  |
| C | 0.00003300  | -0.35551600 | -0.29611800 |
| H | 0.00005200  | -0.64501000 | -1.35408700 |
| H | -0.00034000 | 0.79981100  | -0.34609900 |
| C | -1.28359400 | -0.78593700 | 0.39250500  |
| H | -1.26582000 | -0.44265500 | 1.43357400  |
| H | -1.31144500 | -1.88164000 | 0.43422000  |
| C | -2.53186300 | -0.25645200 | -0.30859300 |
| H | -2.59110900 | -0.63513000 | -1.33206400 |
| H | -3.44146300 | -0.55771300 | 0.21407500  |
| H | -2.50782700 | 0.83476000  | -0.35694500 |
| O | -0.00146700 | 2.22514900  | 0.08154300  |
| H | 0.00798200  | 2.04463800  | 1.03551300  |

**3.1.6 C6 (*n*-C<sub>6</sub>H<sub>14</sub>)****OH-R10: OH + CH<sub>3</sub>(CH<sub>2</sub>)<sub>4</sub>CH<sub>3</sub> → H<sub>2</sub>O + CH<sub>2</sub>(CH<sub>2</sub>)<sub>4</sub>CH<sub>3</sub>*****n*-C<sub>6</sub>H<sub>14</sub>**

|   |             |             |             |
|---|-------------|-------------|-------------|
| C | -3.20106000 | 0.20961500  | 0.00000200  |
| H | -3.27882500 | 0.85046900  | -0.88247200 |
| H | -3.27882700 | 0.85045200  | 0.88248700  |
| H | -4.05823200 | -0.46680300 | -0.00000600 |
| C | -1.87880500 | -0.55378100 | -0.00000300 |
| H | -1.83095200 | -1.20892400 | 0.87685300  |
| H | -1.83095300 | -1.20891600 | -0.87686400 |
| C | -0.66565300 | 0.37359100  | 0.00000100  |
| H | -0.71269900 | 1.03056800  | 0.87748000  |
| H | -0.71269600 | 1.03057100  | -0.87747600 |
| C | 0.66565300  | -0.37359100 | 0.00000100  |
| H | 0.71269600  | -1.03057200 | -0.87747500 |
| H | 0.71269800  | -1.03056700 | 0.87748000  |
| C | 1.87880500  | 0.55378100  | -0.00000300 |
| H | 1.83095200  | 1.20892400  | 0.87685300  |
| H | 1.83095300  | 1.20891600  | -0.87686400 |
| C | 3.20106000  | -0.20961500 | 0.00000200  |
| H | 3.27882700  | -0.85046500 | -0.88247500 |
| H | 4.05823200  | 0.46680300  | -0.00000100 |



|   |            |             |            |
|---|------------|-------------|------------|
| H | 3.27882600 | -0.85045600 | 0.88248500 |
|---|------------|-------------|------------|

**CH<sub>2</sub>(CH<sub>2</sub>)<sub>4</sub>CH<sub>3</sub>**

|   |             |             |             |
|---|-------------|-------------|-------------|
| C | -3.12755500 | -0.22409400 | 0.01820800  |
| H | -3.19638000 | -0.80856300 | 0.93952500  |
| H | -3.20354500 | -0.91959800 | -0.82176300 |
| H | -3.99035600 | 0.44373000  | -0.02018700 |
| C | -1.81292000 | 0.55012600  | -0.03546200 |
| H | -1.77395300 | 1.14928100  | -0.95164500 |
| H | -1.76713900 | 1.25869500  | 0.79863800  |
| C | -0.59151500 | -0.36482400 | 0.01758300  |
| H | -0.63601500 | -1.07501700 | -0.81732000 |
| H | -0.62931400 | -0.96607000 | 0.93445300  |
| C | 0.73059000  | 0.39518800  | -0.03516100 |
| H | 0.77817300  | 1.10346000  | 0.80058000  |
| H | 0.77395100  | 0.99402900  | -0.95182100 |
| C | 1.95185600  | -0.52498300 | 0.02043400  |
| H | 1.91060700  | -1.24174600 | -0.80820300 |
| H | 1.88727800  | -1.13589200 | 0.93612700  |
| C | 3.24426700  | 0.21359400  | -0.01091700 |
| H | 3.31641100  | 1.20509400  | 0.41903400  |
| H | 4.16194300  | -0.27744300 | -0.30552900 |

**TS10: OH + CH<sub>3</sub>(CH<sub>2</sub>)<sub>4</sub>CH<sub>3</sub> → H<sub>2</sub>O + CH<sub>2</sub>(CH<sub>2</sub>)<sub>4</sub>CH<sub>3</sub>**

|   |             |             |             |
|---|-------------|-------------|-------------|
| C | -2.58633500 | -0.86513300 | 0.25924300  |
| H | -2.91147000 | 0.20485100  | -0.07886800 |
| H | -2.64194800 | -0.87440900 | 1.35005200  |
| H | -3.35193100 | -1.51951000 | -0.16002800 |
| C | -1.18947600 | -1.13044600 | -0.26516000 |
| H | -0.89820200 | -2.15491700 | 0.00093600  |
| H | -1.19165300 | -1.08300000 | -1.35871500 |
| C | -0.15413900 | -0.15203800 | 0.28503000  |
| H | -0.16971900 | -0.18782900 | 1.38183700  |
| H | -0.44351600 | 0.86548400  | -0.00222400 |
| C | 1.26122200  | -0.43624700 | -0.20947700 |
| H | 1.27446200  | -0.40714700 | -1.30577000 |
| H | 1.54959900  | -1.45580800 | 0.07501700  |
| C | 2.29465300  | 0.54888000  | 0.33219200  |
| H | 2.27779600  | 0.52125000  | 1.42725700  |
| H | 2.00589000  | 1.56559400  | 0.04445700  |
| C | 3.70575500  | 0.25297600  | -0.16885300 |
| H | 3.74856000  | 0.30092700  | -1.26012400 |
| H | 4.43098600  | 0.96694600  | 0.22650100  |

|   |             |             |             |
|---|-------------|-------------|-------------|
| H | 4.02331000  | -0.74900100 | 0.13168500  |
| O | -3.10848900 | 1.59835400  | -0.30481100 |
| H | -2.82433300 | 1.91178300  | 0.56862300  |

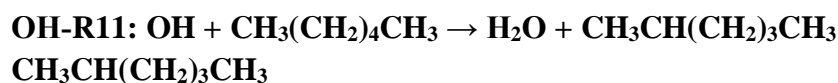

|   |             |             |             |
|---|-------------|-------------|-------------|
| C | 3.15954900  | 0.23408700  | 0.08122600  |
| H | 3.20159000  | 0.77404500  | 1.03077500  |
| H | 3.25882300  | 0.96904800  | -0.72196200 |
| H | 4.02416600  | -0.43100000 | 0.03571600  |
| C | 1.84863600  | -0.53724700 | -0.04640100 |
| H | 1.83749400  | -1.09473600 | -0.98937800 |
| H | 1.77960300  | -1.28292100 | 0.75323700  |
| C | 0.62488400  | 0.37343200  | 0.01217500  |
| H | 0.68367200  | 1.11253500  | -0.79590600 |
| H | 0.63414200  | 0.93983500  | 0.95042200  |
| C | -0.69499400 | -0.38886700 | -0.09916400 |
| H | -0.76004200 | -1.13199000 | 0.70786400  |
| H | -0.68691200 | -0.97932500 | -1.03187300 |
| C | -1.89941800 | 0.48897300  | -0.06128500 |
| H | -1.80599800 | 1.50784500  | -0.42212800 |
| C | -3.25661100 | -0.09962700 | 0.11466700  |
| H | -3.28053700 | -0.78618200 | 0.96804600  |
| H | -4.01739400 | 0.66627200  | 0.27206200  |
| H | -3.56088200 | -0.68793000 | -0.76418400 |

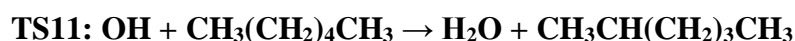

|   |             |             |             |
|---|-------------|-------------|-------------|
| C | -2.81072400 | -1.02688000 | -0.08312500 |
| H | -2.76558100 | -2.11549100 | 0.01892400  |
| H | -2.91703000 | -0.80438900 | -1.14884300 |
| H | -3.70832200 | -0.67844200 | 0.43068100  |
| C | -1.55587000 | -0.38802800 | 0.48511600  |
| H | -1.65981900 | 0.76005500  | 0.41931200  |
| H | -1.46801400 | -0.56508400 | 1.56223300  |
| C | -0.27326700 | -0.75701300 | -0.23936000 |
| H | -0.38052500 | -0.51881600 | -1.30508800 |
| H | -0.13096200 | -1.84476800 | -0.18070500 |
| C | 0.95583300  | -0.04593700 | 0.31987600  |
| H | 1.06832200  | -0.29764600 | 1.38159700  |
| H | 0.79094600  | 1.03645200  | 0.27208900  |
| C | 2.24192000  | -0.40268500 | -0.42140000 |
| H | 2.12816900  | -0.14736900 | -1.48065300 |
| H | 2.39523300  | -1.48680200 | -0.38002300 |

|   |             |            |             |
|---|-------------|------------|-------------|
| C | 3.46320800  | 0.31227600 | 0.15077000  |
| H | 3.61341500  | 0.04657300 | 1.20046700  |
| H | 4.37297300  | 0.05299300 | -0.39428800 |
| H | 3.33696600  | 1.39672600 | 0.09854000  |
| O | -1.81572900 | 2.14085600 | -0.10545900 |
| H | -2.27654200 | 1.88875800 | -0.92183200 |

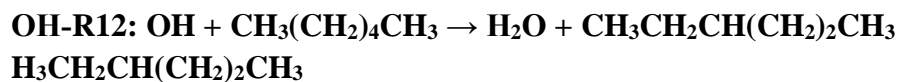

|   |             |             |             |
|---|-------------|-------------|-------------|
| C | -3.18153300 | -0.13785400 | 0.11479900  |
| H | -3.22554800 | -0.71156900 | 1.04433900  |
| H | -3.34492100 | -0.83401100 | -0.71216500 |
| H | -4.00889300 | 0.57422700  | 0.12165900  |
| C | -1.83535500 | 0.56670800  | -0.02466300 |
| H | -1.82001900 | 1.15900200  | -0.94556500 |
| H | -1.69568900 | 1.27235300  | 0.80045900  |
| C | -0.66179000 | -0.41198200 | -0.04399300 |
| H | -0.80474200 | -1.12435700 | -0.87487500 |
| H | -0.68542800 | -1.03042900 | 0.86500800  |
| C | 0.66949600  | 0.24859100  | -0.15952900 |
| H | 0.71757900  | 1.26091600  | -0.55235300 |
| C | 1.93024200  | -0.54423400 | -0.08498500 |
| H | 2.07399600  | -1.10742500 | -1.02166100 |
| H | 1.83248500  | -1.30678900 | 0.69767800  |
| C | 3.16639800  | 0.31656900  | 0.17471200  |
| H | 3.07609500  | 0.84207600  | 1.12789600  |
| H | 4.07489600  | -0.28801400 | 0.20218200  |
| H | 3.28543600  | 1.06723100  | -0.61065000 |

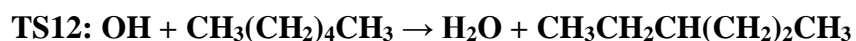

|   |             |             |             |
|---|-------------|-------------|-------------|
| C | 3.05546700  | -0.46890300 | 0.21832900  |
| H | 3.12912800  | -0.82701100 | 1.24832700  |
| H | 3.14974100  | 0.61941500  | 0.23488500  |
| H | 3.89859600  | -0.87909600 | -0.34047600 |
| C | 1.72218700  | -0.87785100 | -0.40206300 |
| H | 1.68248900  | -0.55451400 | -1.44886200 |
| H | 1.63311000  | -1.97098500 | -0.41723900 |
| C | 0.53112500  | -0.30076600 | 0.34345900  |
| H | 0.65793200  | 0.84882700  | 0.36358300  |
| H | 0.56096800  | -0.56795000 | 1.40676200  |
| C | -0.82648400 | -0.60683200 | -0.26362400 |
| H | -0.97388400 | -1.69508100 | -0.27896200 |
| H | -0.83718900 | -0.28594500 | -1.31368300 |

|   |             |             |             |
|---|-------------|-------------|-------------|
| C | -1.98359000 | 0.05484500  | 0.48207300  |
| H | -1.81264100 | 1.13561800  | 0.51128500  |
| H | -1.98055200 | -0.28785600 | 1.52229700  |
| C | -3.33664100 | -0.24601800 | -0.15668200 |
| H | -3.53303300 | -1.32138300 | -0.16973000 |
| H | -4.15147200 | 0.23705500  | 0.38581100  |
| H | -3.36660400 | 0.10937000  | -1.19017600 |
| O | 0.78991800  | 2.25602500  | -0.10010700 |
| H | 0.65167700  | 2.06449100  | -1.04191500 |

### 3.1.7 C7 (*n*-C<sub>7</sub>H<sub>16</sub>)

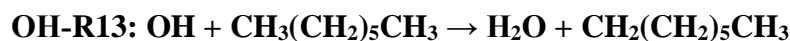

#### *n*-C<sub>7</sub>H<sub>16</sub>

|   |             |             |             |
|---|-------------|-------------|-------------|
| C | 3.81416600  | -0.35993000 | -0.00002900 |
| H | 3.84532500  | -1.00456900 | -0.88246000 |
| H | 3.84537500  | -1.00454500 | 0.88241700  |
| H | 4.71775200  | 0.25298000  | -0.00006300 |
| C | 2.55088300  | 0.49759000  | -0.00000600 |
| H | 2.54978500  | 1.15411600  | 0.87693800  |
| H | 2.54974500  | 1.15410200  | -0.87696000 |
| C | 1.27413700  | -0.34028600 | 0.00002900  |
| H | 1.27432400  | -0.99864000 | -0.87745000 |
| H | 1.27434400  | -0.99860100 | 0.87753700  |
| C | 0.00000000  | 0.50075400  | 0.00002200  |
| H | 0.00000000  | 1.15863900  | -0.87765400 |
| H | 0.00000000  | 1.15865900  | 0.87768400  |
| C | -1.27413700 | -0.34028600 | 0.00003000  |
| H | -1.27434600 | -0.99859500 | 0.87754200  |
| H | -1.27432200 | -0.99864500 | -0.87744500 |
| C | -2.55088300 | 0.49759000  | -0.00001300 |
| H | -2.54974600 | 1.15409100  | -0.87697500 |
| H | -2.54978400 | 1.15412700  | 0.87692200  |
| C | -3.81416600 | -0.35993000 | -0.00002500 |
| H | -3.84537600 | -1.00453100 | 0.88243200  |
| H | -4.71775200 | 0.25298000  | -0.00006900 |
| H | -3.84532400 | -1.00458300 | -0.88244500 |

#### **CH<sub>2</sub>(CH<sub>2</sub>)<sub>5</sub>CH<sub>3</sub>**

|   |             |             |             |
|---|-------------|-------------|-------------|
| C | -3.74620600 | -0.34130000 | -0.02064100 |
| H | -3.78838000 | -1.02372900 | 0.83230600  |
| H | -3.77866800 | -0.94617200 | -0.93072700 |
| H | -4.64403500 | 0.27955400  | 0.00153100  |
| C | -2.47531700 | 0.50358400  | 0.02276200  |

|   |             |             |             |
|---|-------------|-------------|-------------|
| H | -2.46565900 | 1.19941200  | -0.82319600 |
| H | -2.47089400 | 1.11932000  | 0.92877300  |
| C | -1.20627700 | -0.34519400 | -0.01325200 |
| H | -1.21358000 | -1.04238400 | 0.83356000  |
| H | -1.21077600 | -0.96307200 | -0.91955400 |
| C | 0.07481600  | 0.48410700  | 0.02596900  |
| H | 0.08325500  | 1.09667200  | 0.93583300  |
| H | 0.07759000  | 1.18543200  | -0.81736300 |
| C | 1.34009000  | -0.36787400 | -0.02324300 |
| H | 1.33598600  | -0.97929600 | -0.93251700 |
| H | 1.34247500  | -1.06757100 | 0.82098000  |
| C | 2.62414000  | 0.46391500  | 0.01422100  |
| H | 2.61125400  | 1.08464400  | 0.92529500  |
| H | 2.62634100  | 1.17506100  | -0.82012400 |
| C | 3.85950600  | -0.36608300 | -0.02358400 |
| H | 4.80360700  | 0.04825900  | -0.35069100 |
| H | 3.86697000  | -1.35306700 | 0.42251200  |

**TS13: OH + CH<sub>3</sub>(CH<sub>2</sub>)<sub>5</sub>CH<sub>3</sub> → H<sub>2</sub>O + CH<sub>2</sub>(CH<sub>2</sub>)<sub>5</sub>CH<sub>3</sub>**

|   |             |             |             |
|---|-------------|-------------|-------------|
| C | -2.96829800 | 0.84391600  | -0.00058500 |
| H | -2.97830900 | 1.53110000  | -0.84942900 |
| H | -3.03244100 | 1.40409200  | 0.93430300  |
| H | -3.97643300 | 0.26380900  | -0.10276700 |
| C | -1.80625400 | -0.12885100 | -0.03977300 |
| H | -1.87371200 | -0.82655600 | 0.80241300  |
| H | -1.86362900 | -0.73227200 | -0.95116900 |
| C | -0.45327300 | 0.58553700  | 0.01178700  |
| H | -0.38319300 | 1.28577200  | -0.82889500 |
| H | -0.39728200 | 1.19127600  | 0.92414600  |
| C | 0.72929300  | -0.37928200 | -0.03203400 |
| H | 0.67146900  | -0.98158000 | -0.94668000 |
| H | 0.65492300  | -1.08325300 | 0.80568000  |
| C | 2.08060100  | 0.32878000  | 0.02204700  |
| H | 2.14103000  | 0.92635200  | 0.93999500  |
| H | 2.15282900  | 1.03819200  | -0.81141900 |
| C | 3.26543600  | -0.63297900 | -0.03201700 |
| H | 3.20687800  | -1.22388600 | -0.95256600 |
| H | 3.18865800  | -1.34516900 | 0.79679100  |
| C | 4.60930900  | 0.08823300  | 0.03183500  |
| H | 4.70094000  | 0.65760300  | 0.96053800  |
| H | 5.44485100  | -0.61283300 | -0.01507400 |
| H | 4.71360600  | 0.79072400  | -0.79918300 |
| O | -5.04327800 | -0.67320900 | -0.05376500 |

|   |             |             |            |
|---|-------------|-------------|------------|
| H | -4.76485200 | -1.12982500 | 0.75587700 |
|---|-------------|-------------|------------|

**OH-R14: OH + CH<sub>3</sub>(CH<sub>2</sub>)<sub>5</sub>CH<sub>3</sub> → H<sub>2</sub>O + CH<sub>3</sub>CH(CH<sub>2</sub>)<sub>4</sub>CH<sub>3</sub>**  
**CH<sub>3</sub>CH(CH<sub>2</sub>)<sub>4</sub>CH<sub>3</sub>**

|   |             |             |             |
|---|-------------|-------------|-------------|
| C | 3.77579800  | -0.33570000 | -0.00530900 |
| H | 3.80510000  | -1.05136500 | -0.83111000 |
| H | 3.82416100  | -0.90378500 | 0.92748100  |
| H | 4.67249300  | 0.28419800  | -0.06669000 |
| C | 2.50372200  | 0.50658100  | -0.06125800 |
| H | 2.50926000  | 1.23766700  | 0.75451500  |
| H | 2.48243200  | 1.08344500  | -0.99218100 |
| C | 1.23591100  | -0.33918600 | 0.03377200  |
| H | 1.22898700  | -1.07250200 | -0.78213400 |
| H | 1.25644200  | -0.91725000 | 0.96591700  |
| C | -0.04456800 | 0.48910000  | -0.02013700 |
| H | -0.07275100 | 1.06128100  | -0.95437800 |
| H | -0.03663300 | 1.22401800  | 0.79362000  |
| C | -1.31164100 | -0.35900500 | 0.08514400  |
| H | -1.26987900 | -0.94710900 | 1.01837000  |
| H | -1.32329800 | -1.10568400 | -0.72145500 |
| C | -2.57105500 | 0.43758300  | 0.04060700  |
| H | -2.53855000 | 1.47334700  | 0.36208300  |
| C | -3.89001400 | -0.24242900 | -0.09075900 |
| H | -4.15383300 | -0.79766100 | 0.82198700  |
| H | -4.69721800 | 0.46562400  | -0.28407900 |
| H | -3.87563700 | -0.97589100 | -0.90431000 |

**TS14: OH + CH<sub>3</sub>(CH<sub>2</sub>)<sub>5</sub>CH<sub>3</sub> → H<sub>2</sub>O + CH<sub>3</sub>CH(CH<sub>2</sub>)<sub>4</sub>CH<sub>3</sub>**

|   |             |             |             |
|---|-------------|-------------|-------------|
| C | 3.38803600  | -1.03624000 | -0.18567500 |
| H | 3.42868000  | -0.82098200 | -1.25741200 |
| H | 3.34858500  | -2.12402900 | -0.07334900 |
| H | 4.31553100  | -0.68465500 | 0.26956500  |
| C | 2.17062500  | -0.39169100 | 0.45325800  |
| H | 2.14216700  | -0.57046500 | 1.53326400  |
| H | 2.27823900  | 0.75604000  | 0.38402900  |
| C | 0.84749700  | -0.75093800 | -0.19965300 |
| H | 0.89464400  | -0.50410200 | -1.26782600 |
| H | 0.70432800  | -1.83857700 | -0.14219800 |
| C | -0.34508100 | -0.03991400 | 0.43451600  |
| H | -0.17159400 | 1.04140100  | 0.39783900  |
| H | -0.40476900 | -0.31110100 | 1.49560400  |
| C | -1.66950600 | -0.37151600 | -0.24748600 |
| H | -1.83226600 | -1.45633600 | -0.22560600 |

|   |             |             |             |
|---|-------------|-------------|-------------|
| H | -1.61252200 | -0.09054900 | -1.30644300 |
| C | -2.86515500 | 0.32926800  | 0.39370900  |
| H | -2.69679600 | 1.41131600  | 0.37792800  |
| H | -2.92588000 | 0.04222900  | 1.44917500  |
| C | -4.18178600 | 0.00159800  | -0.30584300 |
| H | -4.37843400 | -1.07354400 | -0.28148200 |
| H | -5.02562400 | 0.50723400  | 0.16777900  |
| H | -4.15180900 | 0.30931400  | -1.35449600 |
| O | 2.40419900  | 2.13553800  | -0.15205900 |
| H | 2.78614400  | 1.87910700  | -1.00685100 |

**OH-R15: OH + CH<sub>3</sub>(CH<sub>2</sub>)<sub>5</sub>CH<sub>3</sub> → H<sub>2</sub>O + CH<sub>3</sub>CH<sub>2</sub>CH(CH<sub>2</sub>)<sub>3</sub>CH<sub>3</sub>**  
**CH<sub>3</sub>CH<sub>2</sub>CH(CH<sub>2</sub>)<sub>3</sub>CH<sub>3</sub>**

|   |             |             |             |
|---|-------------|-------------|-------------|
| C | -3.76703800 | -0.42864700 | 0.06357600  |
| H | -3.75250200 | -1.06724800 | 0.95071400  |
| H | -3.80190200 | -1.08031800 | -0.81347100 |
| H | -4.68980700 | 0.15444200  | 0.08515300  |
| C | -2.53400900 | 0.47048900  | 0.02136400  |
| H | -2.58283200 | 1.12408500  | -0.85654100 |
| H | -2.52696800 | 1.12925700  | 0.89661600  |
| C | -1.23164500 | -0.32468800 | -0.01881100 |
| H | -1.17546900 | -0.97977500 | 0.85819300  |
| H | -1.23578900 | -0.98205800 | -0.89652800 |
| C | 0.01268600  | 0.56155500  | -0.06352400 |
| H | 0.02489400  | 1.22322600  | 0.81399300  |
| H | -0.06361700 | 1.23900000  | -0.93158700 |
| C | 1.28967700  | -0.20482200 | -0.12797500 |
| H | 1.27209200  | -1.21111200 | -0.53809700 |
| C | 2.60502900  | 0.48025600  | 0.02674800  |
| H | 2.58418200  | 1.10874400  | 0.92687100  |
| H | 2.76017300  | 1.18292500  | -0.80827300 |
| C | 3.78306100  | -0.48998600 | 0.09526700  |
| H | 3.83479500  | -1.09608000 | -0.81263600 |
| H | 4.73190100  | 0.03875200  | 0.20156900  |
| H | 3.67428500  | -1.16878000 | 0.94415300  |

**TS15: OH + CH<sub>3</sub>(CH<sub>2</sub>)<sub>5</sub>CH<sub>3</sub> → H<sub>2</sub>O + CH<sub>3</sub>CH<sub>2</sub>CH(CH<sub>2</sub>)<sub>3</sub>CH<sub>3</sub>**

|   |            |             |             |
|---|------------|-------------|-------------|
| C | 3.62231700 | -0.31796400 | 0.28526000  |
| H | 3.66579100 | -0.40009600 | 1.37468300  |
| H | 3.66222700 | 0.74258000  | 0.02557400  |
| H | 4.50983700 | -0.80426300 | -0.12337600 |
| C | 2.34085800 | -0.94626200 | -0.25573300 |
| H | 2.33257500 | -0.89596800 | -1.34926300 |

|   |             |             |             |
|---|-------------|-------------|-------------|
| H | 2.30207800  | -2.01068400 | 0.00759600  |
| C | 1.09161500  | -0.26599500 | 0.27895700  |
| H | 1.09290600  | -0.24716500 | 1.37541400  |
| H | 1.16677000  | 0.83588200  | -0.04406600 |
| C | -0.22571300 | -0.79753100 | -0.25804900 |
| H | -0.32819300 | -1.85130500 | 0.03447700  |
| H | -0.20183900 | -0.77997300 | -1.35356700 |
| C | -1.43516600 | -0.00961300 | 0.23861600  |
| H | -1.32742500 | 1.03663300  | -0.07129100 |
| H | -1.44567100 | -0.01313000 | 1.33593400  |
| C | -2.76366500 | -0.55659400 | -0.27828000 |
| H | -2.86783500 | -1.60255100 | 0.03033900  |
| H | -2.74893200 | -0.55714000 | -1.37337500 |
| C | -3.96051800 | 0.24907900  | 0.22020800  |
| H | -3.88708700 | 1.29161500  | -0.10019900 |
| H | -4.90210200 | -0.15254700 | -0.15942100 |
| H | -4.00809900 | 0.23974300  | 1.31237800  |
| O | 1.25029800  | 2.30311200  | -0.35359400 |
| H | 0.96424700  | 2.61276200  | 0.52103100  |

**OH-R16: OH + CH<sub>3</sub>(CH<sub>2</sub>)<sub>5</sub>CH<sub>3</sub> → H<sub>2</sub>O + CH<sub>3</sub>(CH<sub>2</sub>)<sub>2</sub>CH(CH<sub>2</sub>)<sub>2</sub>CH<sub>3</sub>  
CH<sub>3</sub>(CH<sub>2</sub>)<sub>2</sub>CH(CH<sub>2</sub>)<sub>2</sub>CH<sub>3</sub>**

|   |             |             |             |
|---|-------------|-------------|-------------|
| C | 3.81767600  | -0.23506000 | 0.16192600  |
| H | 4.00574000  | -0.78761100 | -0.76247400 |
| H | 3.79959800  | -0.95705900 | 0.98262500  |
| H | 4.66080800  | 0.43839000  | 0.32730000  |
| C | 2.49889200  | 0.52839000  | 0.08175600  |
| H | 2.33889500  | 1.09611500  | 1.00377200  |
| H | 2.54351600  | 1.26108100  | -0.73096900 |
| C | 1.30006900  | -0.39356800 | -0.14548300 |
| H | 1.47332800  | -0.97716000 | -1.06641200 |
| H | 1.25127300  | -1.13815400 | 0.66093000  |
| C | 0.00000000  | 0.33080900  | -0.23160900 |
| H | 0.00000000  | 1.34680000  | -0.61828400 |
| C | -1.30006900 | -0.39356800 | -0.14548300 |
| H | -1.25127300 | -1.13815300 | 0.66093100  |
| H | -1.47332800 | -0.97716100 | -1.06641100 |
| C | -2.49889200 | 0.52838900  | 0.08175600  |
| H | -2.54351600 | 1.26108100  | -0.73097000 |
| H | -2.33889500 | 1.09611600  | 1.00377200  |
| C | -3.81767600 | -0.23506000 | 0.16192600  |
| H | -3.79959900 | -0.95705900 | 0.98262600  |
| H | -4.66080800 | 0.43839000  | 0.32729900  |



|   |             |             |             |
|---|-------------|-------------|-------------|
| H | -4.00574000 | -0.78761100 | -0.76247400 |
|---|-------------|-------------|-------------|

**TS16: OH + CH<sub>3</sub>(CH<sub>2</sub>)<sub>5</sub>CH<sub>3</sub> → H<sub>2</sub>O + CH<sub>3</sub>(CH<sub>2</sub>)<sub>2</sub>CH(CH<sub>2</sub>)<sub>2</sub>CH<sub>3</sub>**

|   |             |             |             |
|---|-------------|-------------|-------------|
| C | -3.82862200 | -0.60140700 | -0.20205900 |
| H | -3.90600300 | -1.65964800 | 0.06171200  |
| H | -3.85019800 | -0.52839500 | -1.29246400 |
| H | -4.71457100 | -0.09415000 | 0.18449500  |
| C | -2.54550900 | 0.00816700  | 0.35610500  |
| H | -2.48976300 | 1.06983200  | 0.09476500  |
| H | -2.55628000 | -0.04532400 | 1.45044800  |
| C | -1.29224000 | -0.69044300 | -0.16623800 |
| H | -1.32176000 | -1.75377600 | 0.10853000  |
| H | -1.28245300 | -0.65396900 | -1.26177200 |
| C | -0.00593400 | -0.08058100 | 0.36373600  |
| H | -0.00750000 | -0.04712100 | 1.45979100  |
| H | -0.00997300 | 1.01861700  | 0.02477800  |
| C | 1.27633100  | -0.70053700 | -0.16318300 |
| H | 1.25824100  | -0.69042600 | -1.25903700 |
| H | 1.30980100  | -1.75663900 | 0.13744300  |
| C | 2.53417300  | 0.01010400  | 0.33126400  |
| H | 2.54056500  | 0.00900200  | 1.42709000  |
| H | 2.48991800  | 1.05808000  | 0.01678000  |
| C | 3.81473300  | -0.63477100 | -0.19187400 |
| H | 3.83444100  | -0.62585400 | -1.28460600 |
| H | 4.70296600  | -0.10862900 | 0.16301900  |
| H | 3.88881600  | -1.67577600 | 0.13363700  |
| O | 0.01398300  | 2.47782400  | -0.33408700 |
| H | 0.28428300  | 2.79839200  | 0.54157600  |

### 3.1.8 C8 (*n*-C<sub>8</sub>H<sub>18</sub>)

**OH-R17: OH + CH<sub>3</sub>(CH<sub>2</sub>)<sub>6</sub>CH<sub>3</sub> → H<sub>2</sub>O + CH<sub>2</sub>(CH<sub>2</sub>)<sub>6</sub>CH<sub>3</sub>**

***n*-C<sub>8</sub>H<sub>18</sub>**

|   |            |             |             |
|---|------------|-------------|-------------|
| C | 4.46560400 | 0.25915700  | -0.00018000 |
| H | 4.52300000 | 0.90198200  | 0.88228000  |
| H | 4.52274800 | 0.90216000  | -0.88252600 |
| H | 5.34364500 | -0.38977000 | -0.00037200 |
| C | 3.16840100 | -0.54605800 | -0.00007600 |
| H | 3.14079900 | -1.20200900 | -0.87703500 |
| H | 3.14100700 | -1.20213300 | 0.87679700  |
| C | 1.92693900 | 0.34316100  | 0.00012600  |
| H | 1.95349800 | 1.00107100  | -0.87731200 |
| H | 1.95365500 | 1.00091300  | 0.87767700  |
| C | 0.61989100 | -0.44559300 | 0.00016400  |

|   |             |             |             |
|---|-------------|-------------|-------------|
| H | 0.59386000  | -1.10307800 | 0.87775700  |
| H | 0.59383100  | -1.10310000 | -0.87741100 |
| C | -0.61989100 | 0.44559400  | 0.00016000  |
| H | -0.59382500 | 1.10310200  | -0.87741400 |
| H | -0.59386700 | 1.10307600  | 0.87775400  |
| C | -1.92693900 | -0.34316100 | 0.00010800  |
| H | -1.95365500 | -1.00092400 | 0.87765100  |
| H | -1.95349700 | -1.00105900 | -0.87733800 |
| C | -3.16840100 | 0.54605800  | -0.00007900 |
| H | -3.14080800 | 1.20201300  | -0.87703600 |
| H | -3.14099900 | 1.20212900  | 0.87679700  |
| C | -4.46560400 | -0.25915700 | -0.00017100 |
| H | -4.52298600 | -0.90199100 | 0.88228300  |
| H | -5.34364600 | 0.38976900  | -0.00034300 |
| H | -4.52276200 | -0.90215200 | -0.88252200 |

**CH<sub>2</sub>(CH<sub>2</sub>)<sub>6</sub>CH<sub>3</sub>**

|   |             |             |             |
|---|-------------|-------------|-------------|
| C | -4.39118300 | -0.27418200 | 0.01334300  |
| H | -4.44223900 | -0.88073000 | 0.92148200  |
| H | -4.44717500 | -0.95292200 | -0.84179500 |
| H | -5.27312100 | 0.36897300  | -0.01034600 |
| C | -3.09920200 | 0.53842200  | -0.02293200 |
| H | -3.07693300 | 1.15729200  | -0.92656000 |
| H | -3.07444300 | 1.23065000  | 0.82566700  |
| C | -1.85208600 | -0.34219400 | 0.01268000  |
| H | -1.87538000 | -1.03573500 | -0.83689200 |
| H | -1.87388700 | -0.96338800 | 0.91657300  |
| C | -0.55032300 | 0.45453000  | -0.02153300 |
| H | -0.52836900 | 1.14949500  | 0.82668300  |
| H | -0.52795800 | 1.07328400  | -0.92681900 |
| C | 0.69460800  | -0.42848200 | 0.01757900  |
| H | 0.66953100  | -1.12686800 | -0.82780300 |
| H | 0.67493700  | -1.04363700 | 0.92552700  |
| C | 1.99560000  | 0.36813000  | -0.02542000 |
| H | 2.02508300  | 1.06559700  | 0.82014400  |
| H | 2.02142300  | 0.98064700  | -0.93361400 |
| C | 3.24159500  | -0.51932900 | 0.01575000  |
| H | 3.21648600  | -1.22784500 | -0.82049300 |
| H | 3.19714800  | -1.14135800 | 0.92505600  |
| C | 4.51306600  | 0.25473400  | -0.01306900 |
| H | 4.56177900  | 1.24042000  | 0.43329600  |
| H | 5.44066900  | -0.20365200 | -0.32849200 |

**TS17: OH + CH<sub>3</sub>(CH<sub>2</sub>)<sub>6</sub>CH<sub>3</sub> → H<sub>2</sub>O + CH<sub>2</sub>(CH<sub>2</sub>)<sub>6</sub>CH<sub>3</sub>**

|   |             |             |             |
|---|-------------|-------------|-------------|
| C | -3.64525900 | 0.77966300  | 0.00795700  |
| H | -3.68252500 | 1.46560600  | -0.84110100 |
| H | -3.74115400 | 1.33524300  | 0.94278700  |
| H | -4.62565800 | 0.15450300  | -0.09852500 |
| C | -2.43798600 | -0.13695000 | -0.02459000 |
| H | -2.46969000 | -0.82743300 | 0.82573900  |
| H | -2.46783600 | -0.75204000 | -0.92951800 |
| C | -1.12078800 | 0.64228300  | 0.01512900  |
| H | -1.09591800 | 1.26818100  | 0.91507400  |
| H | -1.08302700 | 1.32784100  | -0.83958000 |
| C | 0.10724900  | -0.26486900 | -0.00777000 |
| H | 0.07427400  | -0.89725200 | -0.90306300 |
| H | 0.07247700  | -0.94497900 | 0.85188100  |
| C | 1.42222700  | 0.51084100  | 0.01444300  |
| H | 1.45317800  | 1.14636600  | 0.90782900  |
| H | 1.45662700  | 1.18889700  | -0.84689100 |
| C | 2.65247400  | -0.39275800 | -0.00563200 |
| H | 2.62001600  | -1.03168900 | -0.89670100 |
| H | 2.62172200  | -1.06835300 | 0.85802600  |
| C | 3.96807400  | 0.38257700  | 0.00897700  |
| H | 3.99841600  | 1.02126600  | 0.89849200  |
| H | 3.99743500  | 1.05543800  | -0.85494800 |
| C | 5.18901400  | -0.53363200 | -0.00995200 |
| H | 5.18902700  | -1.16255700 | -0.90414800 |
| H | 6.12003800  | 0.03645900  | -0.00112500 |
| H | 5.19205000  | -1.19495100 | 0.86050100  |
| O | -5.64257700 | -0.83745200 | -0.07656700 |
| H | -5.29887000 | -1.34386800 | 0.67643400  |

**OH-R18: OH + CH<sub>3</sub>(CH<sub>2</sub>)<sub>6</sub>CH<sub>3</sub> → H<sub>2</sub>O + CH<sub>3</sub>CH(CH<sub>2</sub>)<sub>5</sub>CH<sub>3</sub>  
CH<sub>3</sub>CH(CH<sub>2</sub>)<sub>5</sub>CH<sub>3</sub>**

|   |             |             |             |
|---|-------------|-------------|-------------|
| C | -4.41658700 | 0.27483500  | 0.06703500  |
| H | -4.49004100 | 0.98207300  | -0.76333400 |
| H | -4.45265800 | 0.85023900  | 0.99586900  |
| H | -5.29754500 | -0.36947400 | 0.03774200  |
| C | -3.12413700 | -0.53284700 | -0.01989300 |
| H | -3.08225200 | -1.25217600 | 0.80523500  |
| H | -3.11735800 | -1.12229100 | -0.94319600 |
| C | -1.87758600 | 0.34840300  | 0.02135400  |
| H | -1.88586500 | 0.94331800  | 0.94286700  |
| H | -1.91491100 | 1.06611600  | -0.80740500 |
| C | -0.57637900 | -0.44595700 | -0.05543600 |

|   |             |             |             |
|---|-------------|-------------|-------------|
| H | -0.56815500 | -1.04049100 | -0.97719200 |
| H | -0.54141000 | -1.16354700 | 0.77344000  |
| C | 0.66845500  | 0.43594100  | -0.01109300 |
| H | 0.66371100  | 1.03178100  | 0.90863800  |
| H | 0.63879700  | 1.14961600  | -0.84297400 |
| C | 1.97004600  | -0.36198600 | -0.08244100 |
| H | 1.96188400  | -0.97541700 | -1.00008900 |
| H | 2.00342500  | -1.08619900 | 0.74367800  |
| C | 3.19552600  | 0.48617100  | -0.04655800 |
| H | 3.12659400  | 1.50858400  | -0.40282200 |
| C | 4.53811100  | -0.13501000 | 0.12896100  |
| H | 4.83231600  | -0.72227500 | -0.75397800 |
| H | 5.31547100  | 0.61211700  | 0.29557900  |
| H | 4.54330600  | -0.82926700 | 0.97637100  |

**TS18: OH + CH<sub>3</sub>(CH<sub>2</sub>)<sub>6</sub>CH<sub>3</sub> → H<sub>2</sub>O + CH<sub>3</sub>CH(CH<sub>2</sub>)<sub>5</sub>CH<sub>3</sub>**

|   |             |             |             |
|---|-------------|-------------|-------------|
| C | 4.03643800  | -0.91536800 | -0.10743800 |
| H | 4.09428700  | -0.72075800 | -1.18229300 |
| H | 4.04871300  | -2.00115200 | 0.02778000  |
| H | 4.93294300  | -0.50808200 | 0.36309000  |
| C | 2.77148900  | -0.32095100 | 0.48625700  |
| H | 2.72599500  | -0.47429300 | 1.56962400  |
| H | 2.81895500  | 0.82892300  | 0.38928100  |
| C | 1.48605000  | -0.76657800 | -0.18809600 |
| H | 1.39981300  | -1.85869100 | -0.10549900 |
| H | 1.54719600  | -0.54396000 | -1.26078500 |
| C | 0.24160100  | -0.10513700 | 0.39812800  |
| H | 0.35738200  | 0.98276000  | 0.33529200  |
| H | 0.16966100  | -0.35107100 | 1.46455600  |
| C | -1.04521400 | -0.52647500 | -0.30633500 |
| H | -1.15023100 | -1.61741100 | -0.25571800 |
| H | -0.97383100 | -0.27311600 | -1.37121900 |
| C | -2.29182800 | 0.12808100  | 0.28332300  |
| H | -2.18174700 | 1.21857500  | 0.24230600  |
| H | -2.37121600 | -0.13244400 | 1.34598100  |
| C | -3.57898400 | -0.27577900 | -0.43181400 |
| H | -3.68664300 | -1.36533300 | -0.39157100 |
| H | -3.49800200 | -0.01317400 | -1.49232600 |
| C | -4.81669600 | 0.38622100  | 0.16847000  |
| H | -4.73745700 | 1.47539600  | 0.11770700  |
| H | -5.72645000 | 0.09148100  | -0.35837500 |
| H | -4.93369200 | 0.11151700  | 1.22008000  |
| O | 2.87707800  | 2.19757500  | -0.18358400 |

|   |            |            |             |
|---|------------|------------|-------------|
| H | 3.33056900 | 1.94615100 | -1.00421300 |
|---|------------|------------|-------------|

**OH-R19: OH + CH<sub>3</sub>(CH<sub>2</sub>)<sub>6</sub>CH<sub>3</sub> → H<sub>2</sub>O + CH<sub>3</sub>CH<sub>2</sub>CH(CH<sub>2</sub>)<sub>4</sub>CH<sub>3</sub>**  
**CH<sub>3</sub>CH<sub>2</sub>CH(CH<sub>2</sub>)<sub>4</sub>CH<sub>3</sub>**

|   |             |             |             |
|---|-------------|-------------|-------------|
| C | 4.43167500  | -0.19180800 | 0.09259100  |
| H | 4.53843400  | -0.86820100 | -0.75961600 |
| H | 4.47436500  | -0.79655400 | 1.00236400  |
| H | 5.29157600  | 0.48085200  | 0.09649300  |
| C | 3.11482000  | 0.57641000  | 0.01420700  |
| H | 3.03823200  | 1.26541400  | 0.86239200  |
| H | 3.10168100  | 1.19664900  | -0.88865100 |
| C | 1.89787700  | -0.34584500 | 0.00606800  |
| H | 1.91218900  | -0.97089500 | 0.90748400  |
| H | 1.97144500  | -1.03382700 | -0.84536400 |
| C | 0.57325300  | 0.40808400  | -0.06548400 |
| H | 0.55965000  | 1.03467700  | -0.96517900 |
| H | 0.49316000  | 1.09051200  | 0.78841000  |
| C | -0.64315800 | -0.51691200 | -0.08150100 |
| H | -0.62779100 | -1.16018100 | 0.80974100  |
| H | -0.55337700 | -1.21048700 | -0.93529800 |
| C | -1.94416500 | 0.20796600  | -0.14846100 |
| H | -1.95710100 | 1.21842100  | -0.54863700 |
| C | -3.23838900 | -0.52069000 | -0.01614900 |
| H | -3.17324000 | -1.22758000 | 0.82082600  |
| H | -3.40867000 | -1.14578500 | -0.90819200 |
| C | -4.43401400 | 0.41089100  | 0.17893100  |
| H | -4.52247300 | 1.10458600  | -0.66085500 |
| H | -5.36851700 | -0.14826400 | 0.25297800  |
| H | -4.31695700 | 1.00208700  | 1.08989400  |

**TS19: OH + CH<sub>3</sub>(CH<sub>2</sub>)<sub>6</sub>CH<sub>3</sub> → H<sub>2</sub>O + CH<sub>3</sub>CH<sub>2</sub>CH(CH<sub>2</sub>)<sub>4</sub>CH<sub>3</sub>**

|   |             |             |             |
|---|-------------|-------------|-------------|
| C | -4.20575700 | -0.37626300 | 0.26633700  |
| H | -4.25731700 | 0.71483300  | 0.24722500  |
| H | -4.26844000 | -0.69618900 | 1.30959800  |
| H | -5.07717800 | -0.77142400 | -0.25879200 |
| C | -2.90410100 | -0.85780300 | -0.36905400 |
| H | -2.85856500 | -1.95356000 | -0.35100200 |
| H | -2.87503600 | -0.56872100 | -1.42618900 |
| C | -1.67518900 | -0.30575200 | 0.33260100  |
| H | -1.68867300 | -0.54372600 | 1.40308800  |
| H | -1.76109500 | 0.84822200  | 0.32434600  |
| C | -0.34402000 | -0.67501100 | -0.29781300 |
| H | -0.34550000 | -0.37358300 | -1.35362200 |

|   |             |             |             |
|---|-------------|-------------|-------------|
| H | -0.23843400 | -1.76806000 | -0.29598000 |
| C | 0.85182300  | -0.04324100 | 0.41106400  |
| H | 0.87107200  | -0.37980900 | 1.45456200  |
| H | 0.71495100  | 1.04388500  | 0.43911700  |
| C | 2.18477500  | -0.37667400 | -0.25325300 |
| H | 2.16545800  | -0.03758700 | -1.29651200 |
| H | 2.31584700  | -1.46545300 | -0.28674000 |
| C | 3.38149300  | 0.25286700  | 0.45613900  |
| H | 3.40439900  | -0.09080500 | 1.49597500  |
| H | 3.24480100  | 1.33890900  | 0.49358200  |
| C | 4.70715700  | -0.07718600 | -0.22495100 |
| H | 4.71174300  | 0.27832700  | -1.25873200 |
| H | 5.55069900  | 0.38496700  | 0.29159700  |
| H | 4.87653800  | -1.15699100 | -0.24492700 |
| O | -1.84434700 | 2.24202700  | -0.18655400 |
| H | -1.70758700 | 2.01492600  | -1.12058600 |

**OH-R20: OH + CH<sub>3</sub>(CH<sub>2</sub>)<sub>6</sub>CH<sub>3</sub> → H<sub>2</sub>O + CH<sub>3</sub>(CH<sub>2</sub>)<sub>2</sub>CH(CH<sub>2</sub>)<sub>3</sub>CH<sub>3</sub>  
CH<sub>3</sub>(CH<sub>2</sub>)<sub>2</sub>CH(CH<sub>2</sub>)<sub>3</sub>CH<sub>3</sub>**

|   |             |             |             |
|---|-------------|-------------|-------------|
| C | -4.42493000 | 0.37776300  | 0.12374100  |
| H | -4.49241600 | 1.04049700  | -0.74305800 |
| H | -4.40394000 | 1.00456000  | 1.01913800  |
| H | -5.33508300 | -0.22435900 | 0.15711600  |
| C | -3.17524300 | -0.49519000 | 0.04208600  |
| H | -3.13461700 | -1.16357300 | 0.90912500  |
| H | -3.23145800 | -1.13975700 | -0.84203200 |
| C | -1.89051600 | 0.32682000  | -0.01936300 |
| H | -1.82710700 | 0.97393700  | 0.86307000  |
| H | -1.92811600 | 0.99305300  | -0.88961800 |
| C | -0.62991400 | -0.53327900 | -0.10251700 |
| H | -0.71510600 | -1.20593200 | -0.97356500 |
| H | -0.58175200 | -1.20084100 | 0.76917700  |
| C | 0.62918700  | 0.25964200  | -0.19370300 |
| H | 0.58106400  | 1.26297800  | -0.60879600 |
| C | 1.96200800  | -0.39590600 | -0.06918500 |
| H | 2.13967300  | -1.06081600 | -0.93232400 |
| H | 1.96431000  | -1.05999000 | 0.80663900  |
| C | 3.12374200  | 0.59231200  | 0.03723400  |
| H | 2.95952300  | 1.24040300  | 0.90395300  |
| H | 3.11814600  | 1.24340500  | -0.84328400 |
| C | 4.47571900  | -0.10502700 | 0.15582100  |
| H | 4.66895800  | -0.73325300 | -0.71786700 |
| H | 5.29238300  | 0.61474800  | 0.23801600  |

|   |            |             |            |
|---|------------|-------------|------------|
| H | 4.50522500 | -0.74787100 | 1.03962200 |
|---|------------|-------------|------------|

**TS20: OH + CH<sub>3</sub>(CH<sub>2</sub>)<sub>6</sub>CH<sub>3</sub> → H<sub>2</sub>O + CH<sub>3</sub>(CH<sub>2</sub>)<sub>2</sub>CH(CH<sub>2</sub>)<sub>3</sub>CH<sub>3</sub>**

|   |             |             |             |
|---|-------------|-------------|-------------|
| C | -4.40362900 | -0.55328800 | -0.13830100 |
| H | -4.49224000 | -1.61156700 | 0.12177000  |
| H | -4.45087100 | -0.47377300 | -1.22748500 |
| H | -5.27115900 | -0.03362100 | 0.27282500  |
| C | -3.09727600 | 0.03182400  | 0.39136500  |
| H | -3.02943600 | 1.09363700  | 0.13366300  |
| H | -3.08273700 | -0.02632500 | 1.48539000  |
| C | -1.86895300 | -0.68583500 | -0.16350000 |
| H | -1.88555700 | -0.64665300 | -1.25888900 |
| H | -1.90876500 | -1.74928800 | 0.10959300  |
| C | -0.56072300 | -0.09739800 | 0.33611800  |
| H | -0.53543100 | -0.06557400 | 1.43188700  |
| H | -0.55885700 | 1.00279400  | 0.00008400  |
| C | 0.69899200  | -0.73599400 | -0.22248000 |
| H | 0.65293900  | -0.72616500 | -1.31741300 |
| H | 0.72465200  | -1.79193800 | 0.07888200  |
| C | 1.97731400  | -0.04208100 | 0.24039100  |
| H | 2.01260100  | -0.03842200 | 1.33722800  |
| H | 1.94475200  | 1.00705500  | -0.07700300 |
| C | 3.24703800  | -0.69425100 | -0.30127900 |
| H | 3.20789800  | -0.69930700 | -1.39577800 |
| H | 3.27563400  | -1.74360700 | 0.01214400  |
| C | 4.51395300  | 0.01778100  | 0.16545700  |
| H | 4.58578700  | 0.00919500  | 1.25633500  |
| H | 5.41266800  | -0.45680400 | -0.23305700 |
| H | 4.51403100  | 1.06169500  | -0.15913300 |
| O | -0.50605200 | 2.46041200  | -0.36118400 |
| H | -0.10778100 | 2.76082100  | 0.47180600  |

### 3.1.9 C9 (n-C<sub>9</sub>H<sub>20</sub>)

**OH-R21: OH + CH<sub>3</sub>(CH<sub>2</sub>)<sub>7</sub>CH<sub>3</sub> → H<sub>2</sub>O + CH<sub>2</sub>(CH<sub>2</sub>)<sub>7</sub>CH<sub>3</sub>**

*n*-C<sub>9</sub>H<sub>20</sub>

|   |             |             |             |
|---|-------------|-------------|-------------|
| C | -5.08834600 | -0.37898600 | -0.00009600 |
| H | -5.11906800 | -1.02367900 | 0.88229400  |
| H | -5.11900300 | -1.02358000 | -0.88256100 |
| H | -5.99237600 | 0.23325600  | -0.00009600 |
| C | -3.82574400 | 0.47947700  | -0.00000200 |
| H | -3.82511300 | 1.13602000  | -0.87691400 |
| H | -3.82518700 | 1.13593800  | 0.87697000  |
| C | -2.54830400 | -0.35739500 | 0.00001300  |

|   |             |             |             |
|---|-------------|-------------|-------------|
| H | -2.54798800 | -1.01568500 | -0.87749800 |
| H | -2.54803100 | -1.01572000 | 0.87749800  |
| C | -1.27497100 | 0.48479700  | 0.00005800  |
| H | -1.27558700 | 1.14266700  | 0.87770600  |
| H | -1.27553700 | 1.14267500  | -0.87758300 |
| C | 0.00000000  | -0.35531600 | 0.00009000  |
| H | -0.00000600 | -1.01334300 | -0.87741300 |
| H | 0.00000600  | -1.01326300 | 0.87765200  |
| C | 1.27497100  | 0.48479700  | 0.00003800  |
| H | 1.27557100  | 1.14271900  | 0.87764700  |
| H | 1.27555400  | 1.14262300  | -0.87764300 |
| C | 2.54830400  | -0.35739500 | 0.00007000  |
| H | 2.54796800  | -1.01579700 | -0.87735800 |
| H | 2.54805200  | -1.01560800 | 0.87763800  |
| C | 3.82574400  | 0.47947700  | -0.00008500 |
| H | 3.82519700  | 1.13607500  | 0.87678500  |
| H | 3.82510300  | 1.13588300  | -0.87709900 |
| C | 5.08834600  | -0.37898600 | -0.00006200 |
| H | 5.11897000  | -1.02375000 | -0.88240400 |
| H | 5.99237600  | 0.23325600  | -0.00021300 |
| H | 5.11910100  | -1.02350900 | 0.88245100  |

**CH<sub>2</sub>(CH<sub>2</sub>)<sub>7</sub>CH<sub>3</sub>**

|   |             |             |             |
|---|-------------|-------------|-------------|
| C | 5.13670000  | -0.37637700 | -0.02452400 |
| H | 5.14881400  | -1.35675000 | 0.43592500  |
| H | 6.07855800  | 0.03605800  | -0.36045700 |
| C | 3.89909600  | 0.45055800  | 0.00641100  |
| H | 3.88573600  | 1.08039400  | 0.91121000  |
| H | 3.89813600  | 1.15306000  | -0.83515600 |
| C | 2.61723000  | -0.38508800 | -0.02068000 |
| H | 2.62278400  | -1.07630100 | 0.83049200  |
| H | 2.61342200  | -1.00553000 | -0.92382900 |
| C | 1.34989600  | 0.46413000  | 0.02198500  |
| H | 1.34966300  | 1.15707700  | -0.82822300 |
| H | 1.35816300  | 1.08563800  | 0.92574800  |
| C | 0.07071900  | -0.36888700 | -0.00702900 |
| H | 0.06720200  | -1.05725300 | 0.84678900  |
| H | 0.06719900  | -0.99545200 | -0.90716100 |
| C | -1.19928000 | 0.47819600  | 0.02236800  |
| H | -1.19521000 | 1.16626000  | -0.83176700 |
| H | -1.19694500 | 1.10507600  | 0.92239500  |
| C | -2.47747300 | -0.35595200 | -0.00880000 |
| H | -2.48404600 | -1.04241800 | 0.84677600  |



|   |             |             |             |
|---|-------------|-------------|-------------|
| H | -2.47813300 | -0.98540200 | -0.90721000 |
| C | -3.74973900 | 0.48842600  | 0.01414900  |
| H | -3.74092400 | 1.17419700  | -0.84001000 |
| H | -3.74932100 | 1.11495500  | 0.91275600  |
| C | -5.01756900 | -0.36146500 | -0.02144800 |
| H | -5.05797800 | -1.03474400 | 0.83885500  |
| H | -5.91773000 | 0.25626000  | -0.00681800 |
| H | -5.04686800 | -0.97636400 | -0.92491400 |

**TS21: OH + CH<sub>3</sub>(CH<sub>2</sub>)<sub>7</sub>CH<sub>3</sub> → H<sub>2</sub>O + CH<sub>2</sub>(CH<sub>2</sub>)<sub>7</sub>CH<sub>3</sub>**

|   |             |             |             |
|---|-------------|-------------|-------------|
| C | 4.27681900  | 0.80761600  | 0.00772900  |
| H | 4.36137700  | 1.36657900  | 0.94165500  |
| H | 4.30526700  | 1.49236400  | -0.84263200 |
| H | 5.26744000  | 0.19801100  | -0.09493800 |
| C | 3.08443400  | -0.12818700 | -0.02611000 |
| H | 3.12491900  | -0.74243400 | -0.93121000 |
| H | 3.12630900  | -0.81840800 | 0.82400700  |
| C | 1.75500500  | 0.62995400  | 0.01279100  |
| H | 1.70763900  | 1.31635800  | -0.84077100 |
| H | 1.71916300  | 1.25391400  | 0.91374100  |
| C | 0.54139300  | -0.29623700 | -0.01323600 |
| H | 0.58673300  | -0.97858000 | 0.84417600  |
| H | 0.58421100  | -0.92511600 | -0.91060500 |
| C | -0.78531000 | 0.45901200  | 0.01155800  |
| H | -0.82990600 | 1.13995900  | -0.84700400 |
| H | -0.82597900 | 1.09051600  | 0.90740200  |
| C | -2.00198700 | -0.46298000 | -0.01216000 |
| H | -1.95922300 | -1.14259700 | 0.84767100  |
| H | -1.96060900 | -1.09595700 | -0.90695600 |
| C | -3.32751700 | 0.29399800  | 0.00890900  |
| H | -3.37091800 | 0.97344700  | -0.85120000 |
| H | -3.36881000 | 0.92812400  | 0.90312400  |
| C | -4.54718700 | -0.62446000 | -0.01360100 |
| H | -4.50220600 | -1.30317800 | 0.84507600  |
| H | -4.50610000 | -1.25560100 | -0.90805600 |
| C | -5.86310100 | 0.14919500  | 0.01041000  |
| H | -5.93790300 | 0.81483400  | -0.85356200 |
| H | -6.72518700 | -0.52042400 | -0.00634000 |
| H | -5.93414500 | 0.76564300  | 0.91050500  |
| O | 6.29794800  | -0.77946300 | -0.06830600 |
| H | 5.95905400  | -1.28921500 | 0.68461100  |

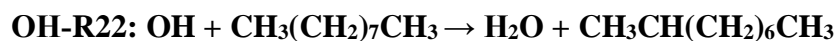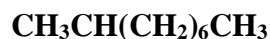

|   |             |             |             |
|---|-------------|-------------|-------------|
| C | 5.17309800  | -0.25076300 | -0.10399600 |
| H | 5.15834000  | -0.97723100 | -0.92378800 |
| H | 5.44143700  | -0.81306200 | 0.80308700  |
| H | 5.97759600  | 0.46134900  | -0.29370200 |
| C | 3.85255700  | 0.42409000  | 0.03741900  |
| H | 3.81769000  | 1.45698800  | 0.36758500  |
| C | 2.59567300  | -0.37673600 | 0.07640900  |
| H | 2.56291300  | -0.98276500 | 0.99841000  |
| H | 2.60311100  | -1.10792200 | -0.74435600 |
| C | 1.32556300  | 0.46952100  | -0.00326200 |
| H | 1.34651400  | 1.06178100  | -0.92509000 |
| H | 1.32016000  | 1.18665200  | 0.82615300  |
| C | 0.04787500  | -0.36403300 | 0.03984300  |
| H | 0.03578000  | -0.96291000 | 0.95872300  |
| H | 0.05273800  | -1.07822500 | -0.79260000 |
| C | -1.22213500 | 0.48061000  | -0.02815600 |
| H | -1.20970000 | 1.08184000  | -0.94535600 |
| H | -1.22823200 | 1.19257300  | 0.80615700  |
| C | -2.50027400 | -0.35323400 | 0.01179100  |
| H | -2.50970900 | -0.95946600 | 0.92598900  |
| H | -2.49810900 | -1.06145000 | -0.82590600 |
| C | -3.77237700 | 0.48967800  | -0.04552800 |
| H | -3.76303700 | 1.09346500  | -0.95950600 |
| H | -3.77226600 | 1.19677700  | 0.79109900  |
| C | -5.04050600 | -0.35929600 | -0.00113000 |
| H | -5.07742800 | -0.95330000 | 0.91593100  |
| H | -5.94041700 | 0.25794700  | -0.03709200 |
| H | -5.07422300 | -1.05205800 | -0.84607600 |

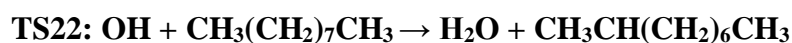

|   |            |             |             |
|---|------------|-------------|-------------|
| C | 4.63422900 | -0.92192500 | -0.19169700 |
| H | 4.65673700 | -0.72714400 | -1.26786800 |
| H | 4.64853100 | -2.00778400 | -0.05728900 |
| H | 5.54676200 | -0.51686600 | 0.24908300  |
| C | 3.39077600 | -0.32499100 | 0.44343500  |
| H | 3.38017200 | -0.47897300 | 1.52756500  |
| H | 3.43756800 | 0.82490800  | 0.34558900  |
| C | 2.08302200 | -0.76707500 | -0.18903900 |
| H | 1.99697700 | -1.85907300 | -0.10469400 |
| H | 2.10954600 | -0.54338700 | -1.26290300 |
| C | 0.86007800 | -0.10323200 | 0.43831500  |

|   |             |             |             |
|---|-------------|-------------|-------------|
| H | 0.97782700  | 0.98445300  | 0.37515000  |
| H | 0.82104500  | -0.35242800 | 1.50572700  |
| C | -0.44985000 | -0.51732000 | -0.22662800 |
| H | -0.55660200 | -1.60818400 | -0.17865400 |
| H | -0.41201500 | -0.25817300 | -1.29183000 |
| C | -1.67478400 | 0.13785400  | 0.40677400  |
| H | -1.55925900 | 1.22788500  | 0.37234100  |
| H | -1.72230700 | -0.13269100 | 1.46871900  |
| C | -2.98421600 | -0.25279700 | -0.27328900 |
| H | -3.09942300 | -1.34343100 | -0.24321700 |
| H | -2.93782800 | 0.02159600  | -1.33450100 |
| C | -4.21022100 | 0.40014100  | 0.36111500  |
| H | -4.09023700 | 1.48868000  | 0.33574300  |
| H | -4.25925000 | 0.12041200  | 1.41919900  |
| C | -5.51075700 | 0.00911400  | -0.33595000 |
| H | -5.66140000 | -1.07310900 | -0.29991400 |
| H | -6.37625900 | 0.48360800  | 0.13074900  |
| H | -5.49206800 | 0.30593300  | -1.38804900 |
| O | 3.48090600  | 2.19300500  | -0.22978500 |
| H | 3.91456800  | 1.94111500  | -1.06087000 |

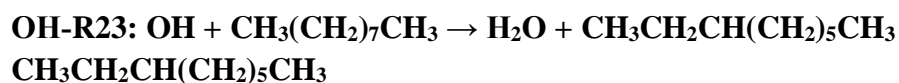

|   |             |             |             |
|---|-------------|-------------|-------------|
| C | -5.05895600 | -0.54544500 | 0.11616700  |
| H | -4.92498900 | -1.25693200 | 0.93412700  |
| H | -5.12237200 | -1.11463800 | -0.81456100 |
| H | -6.01150000 | -0.03332200 | 0.26287700  |
| C | -3.89390200 | 0.44112700  | 0.06435200  |
| H | -4.07034200 | 1.17165600  | -0.74198400 |
| H | -3.86618100 | 1.03721700  | 0.98618100  |
| C | -2.57285600 | -0.22109200 | -0.13489100 |
| H | -2.54974300 | -1.21783900 | -0.56763400 |
| C | -1.30555200 | 0.56183500  | -0.08047700 |
| H | -1.31824800 | 1.22096300  | 0.79876700  |
| H | -1.24566500 | 1.24193300  | -0.94771400 |
| C | -0.04940700 | -0.30876400 | -0.04961900 |
| H | -0.04578100 | -0.96352900 | -0.92911400 |
| H | -0.09008800 | -0.96631900 | 0.82614300  |
| C | 1.24204100  | 0.50398400  | -0.01923300 |
| H | 1.23715800  | 1.16138300  | 0.85877400  |
| H | 1.27679600  | 1.16192700  | -0.89626900 |
| C | 2.49635100  | -0.36568100 | 0.00889100  |
| H | 2.49894000  | -1.02687900 | -0.86639300 |

|   |            |             |             |
|---|------------|-------------|-------------|
| H | 2.46525800 | -1.02056700 | 0.88832500  |
| C | 3.79087500 | 0.44421600  | 0.03053400  |
| H | 3.78739900 | 1.10406800  | 0.90494800  |
| H | 3.82017100 | 1.09715100  | -0.84861000 |
| C | 5.03511700 | -0.44011200 | 0.05748700  |
| H | 5.06748100 | -1.09093800 | -0.82030700 |
| H | 5.95128300 | 0.15366700  | 0.06888100  |
| H | 5.03814700 | -1.07941300 | 0.94430000  |

**TS23: OH + CH<sub>3</sub>(CH<sub>2</sub>)<sub>7</sub>CH<sub>3</sub> → H<sub>2</sub>O + CH<sub>3</sub>CH<sub>2</sub>CH(CH<sub>2</sub>)<sub>5</sub>CH<sub>3</sub>**

|   |             |             |             |
|---|-------------|-------------|-------------|
| C | -4.79380400 | -0.27355200 | 0.36124000  |
| H | -4.81682600 | 0.81695400  | 0.30027200  |
| H | -4.83028600 | -0.55083600 | 1.41794500  |
| H | -5.69223500 | -0.66447300 | -0.11960000 |
| C | -3.52716900 | -0.81526700 | -0.29598000 |
| H | -3.51383200 | -1.91080200 | -0.24329900 |
| H | -3.52165000 | -0.56058300 | -1.36218300 |
| C | -2.26122000 | -0.28000900 | 0.35073200  |
| H | -2.24639600 | -0.48853100 | 1.42727300  |
| H | -2.31565300 | 0.87548500  | 0.31249000  |
| C | -0.96263700 | -0.70498700 | -0.31172000 |
| H | -0.98457500 | -0.41911800 | -1.37173500 |
| H | -0.89590300 | -1.80097700 | -0.29675900 |
| C | 0.27574900  | -0.10765500 | 0.35261000  |
| H | 0.32198300  | -0.44359800 | 1.39542700  |
| H | 0.17335300  | 0.98327100  | 0.38311200  |
| C | 1.57324400  | -0.48206200 | -0.35884100 |
| H | 1.53369800  | -0.12405200 | -1.39503600 |
| H | 1.65822100  | -1.57445400 | -0.41419000 |
| C | 2.81543200  | 0.08606400  | 0.32242300  |
| H | 2.86966600  | -0.29056200 | 1.35118700  |
| H | 2.72078000  | 1.17619100  | 0.39933000  |
| C | 4.11156300  | -0.25689900 | -0.40839000 |
| H | 4.05901500  | 0.13028800  | -1.43181900 |
| H | 4.19893100  | -1.34566200 | -0.49479800 |
| C | 5.34641100  | 0.30460700  | 0.29156200  |
| H | 5.43598400  | -0.09734900 | 1.30420400  |
| H | 6.26238400  | 0.05786300  | -0.24889500 |
| H | 5.28658400  | 1.39328600  | 0.37145400  |
| O | -2.36897400 | 2.25268100  | -0.24251200 |
| H | -2.21687400 | 1.99477700  | -1.16610700 |

**OH-R24: OH + CH<sub>3</sub>(CH<sub>2</sub>)<sub>7</sub>CH<sub>3</sub> → H<sub>2</sub>O + CH<sub>3</sub>(CH<sub>2</sub>)<sub>2</sub>CH(CH<sub>2</sub>)<sub>4</sub>CH<sub>3</sub>**

**CH<sub>3</sub>(CH<sub>2</sub>)<sub>2</sub>CH(CH<sub>2</sub>)<sub>4</sub>CH<sub>3</sub>**

|   |             |             |             |
|---|-------------|-------------|-------------|
| C | -5.10763300 | -0.18947200 | 0.22501700  |
| H | -5.09402400 | -0.85801100 | 1.08984200  |
| H | -5.31128900 | -0.79720100 | -0.66059700 |
| H | -5.93935500 | 0.50592400  | 0.35274200  |
| C | -3.77787600 | 0.54610100  | 0.08606300  |
| H | -3.81810100 | 1.22641100  | -0.77106800 |
| H | -3.60054500 | 1.16863700  | 0.96859200  |
| C | -2.59636500 | -0.40804600 | -0.09259500 |
| H | -2.78811200 | -1.04838800 | -0.97101800 |
| H | -2.55132300 | -1.09977500 | 0.76001100  |
| C | -1.28544000 | 0.28585500  | -0.24061800 |
| H | -1.27608700 | 1.29122600  | -0.65351200 |
| C | -0.00133400 | -0.46928200 | -0.18365100 |
| H | 0.10670600  | -1.10046600 | -1.08254300 |
| H | -0.02759400 | -1.17363400 | 0.65899200  |
| C | 1.23043100  | 0.42834500  | -0.06251300 |
| H | 1.13917200  | 1.04057900  | 0.84175000  |
| H | 1.25048900  | 1.12587800  | -0.90821400 |
| C | 2.53974600  | -0.35431000 | -0.02045900 |
| H | 2.62748000  | -0.96603000 | -0.92681000 |
| H | 2.51724000  | -1.05596800 | 0.82243000  |
| C | 3.77098100  | 0.54053500  | 0.10343300  |
| H | 3.68242300  | 1.14976800  | 1.00936400  |
| H | 3.79194300  | 1.24112100  | -0.73833400 |
| C | 5.07307600  | -0.25553000 | 0.14339800  |
| H | 5.19268600  | -0.85084500 | -0.76560900 |
| H | 5.94251700  | 0.39873100  | 0.23234100  |
| H | 5.08226200  | -0.94312200 | 0.99317800  |

**TS24: OH + CH<sub>3</sub>(CH<sub>2</sub>)<sub>7</sub>CH<sub>3</sub> → H<sub>2</sub>O + CH<sub>3</sub>(CH<sub>2</sub>)<sub>2</sub>CH(CH<sub>2</sub>)<sub>4</sub>CH<sub>3</sub>**

|   |             |             |             |
|---|-------------|-------------|-------------|
| C | -4.94294600 | -0.60787800 | -0.25237300 |
| H | -4.99974200 | -1.69738200 | -0.18016600 |
| H | -4.95928500 | -0.34446800 | -1.31343600 |
| H | -5.84211200 | -0.19413600 | 0.20777400  |
| C | -3.67746400 | -0.08055500 | 0.41818800  |
| H | -3.64644300 | 1.01193400  | 0.35775800  |
| H | -3.68991100 | -0.33314000 | 1.48391500  |
| C | -2.40586900 | -0.64394100 | -0.21258300 |
| H | -2.39570700 | -0.40896400 | -1.28491600 |
| H | -2.41466100 | -1.74003200 | -0.14245100 |
| C | -1.13423800 | -0.11857700 | 0.42985400  |
| H | -1.12986000 | -0.30024500 | 1.51118200  |

|   |             |             |             |
|---|-------------|-------------|-------------|
| H | -1.16043100 | 1.03638200  | 0.36209200  |
| C | 0.15845800  | -0.58898700 | -0.21362100 |
| H | 0.14212700  | -0.34348800 | -1.28358600 |
| H | 0.20725600  | -1.68457200 | -0.15577700 |
| C | 1.40571100  | 0.01427600  | 0.42815600  |
| H | 1.43462500  | -0.26194500 | 1.48909500  |
| H | 1.33031900  | 1.10725300  | 0.39457900  |
| C | 2.69911500  | -0.43317000 | -0.24714300 |
| H | 2.67022600  | -0.15429700 | -1.30794000 |
| H | 2.76731300  | -1.52787700 | -0.21944300 |
| C | 3.94894700  | 0.16538700  | 0.39422500  |
| H | 3.98193300  | -0.11976600 | 1.45142300  |
| H | 3.87479800  | 1.25793200  | 0.37205800  |
| C | 5.23391200  | -0.27855700 | -0.29982900 |
| H | 5.23066100  | 0.02055700  | -1.35146500 |
| H | 6.11690600  | 0.15915800  | 0.16981500  |
| H | 5.33973400  | -1.36615700 | -0.26508300 |
| O | -1.18153300 | 2.40053900  | -0.22667000 |
| H | -1.11924700 | 2.11095600  | -1.15131900 |

**OH-R25: OH + CH<sub>3</sub>(CH<sub>2</sub>)<sub>7</sub>CH<sub>3</sub> → H<sub>2</sub>O + CH<sub>3</sub>(CH<sub>2</sub>)<sub>3</sub>CH(CH<sub>2</sub>)<sub>3</sub>CH<sub>3</sub>  
CH<sub>3</sub>(CH<sub>2</sub>)<sub>3</sub>CH(CH<sub>2</sub>)<sub>3</sub>CH<sub>3</sub>**

|   |             |             |             |
|---|-------------|-------------|-------------|
| C | -5.01868600 | -0.56513000 | 0.16547100  |
| H | -4.90510100 | -1.31713900 | 0.95077700  |
| H | -5.10585400 | -1.09268500 | -0.78804500 |
| H | -5.95657700 | -0.03486800 | 0.34188300  |
| C | -3.82629000 | 0.38784700  | 0.15137100  |
| H | -3.96690800 | 1.14518800  | -0.62766500 |
| H | -3.77524100 | 0.92961100  | 1.10220900  |
| C | -2.50271800 | -0.33520900 | -0.08396900 |
| H | -2.54780200 | -0.87476400 | -1.03766500 |
| H | -2.35682700 | -1.09376400 | 0.69360300  |
| C | -1.29874700 | 0.60668700  | -0.09583100 |
| H | -1.25440900 | 1.15821000  | 0.85327500  |
| H | -1.45926700 | 1.37769700  | -0.86919600 |
| C | 0.00000000  | -0.08791300 | -0.32688400 |
| H | 0.00000300  | -0.99781000 | -0.92176500 |
| C | 1.29874600  | 0.60668500  | -0.09581600 |
| H | 1.25440200  | 1.15820100  | 0.85329400  |
| H | 1.45927100  | 1.37770200  | -0.86917400 |
| C | 2.50271700  | -0.33521100 | -0.08395300 |
| H | 2.54780400  | -0.87475900 | -1.03765300 |
| H | 2.35682300  | -1.09377100 | 0.69361300  |

|   |            |             |             |
|---|------------|-------------|-------------|
| C | 3.82628800 | 0.38784400  | 0.15139500  |
| H | 3.77524900 | 0.92957500  | 1.10225200  |
| H | 3.96689100 | 1.14521200  | -0.62761600 |
| C | 5.01869000 | -0.56512600 | 0.16544500  |
| H | 5.10584200 | -1.09265300 | -0.78808700 |
| H | 5.95658100 | -0.03486300 | 0.34185200  |
| H | 4.90512600 | -1.31715800 | 0.95073200  |

**TS25: OH + CH<sub>3</sub>(CH<sub>2</sub>)<sub>7</sub>CH<sub>3</sub> → H<sub>2</sub>O + CH<sub>3</sub>(CH<sub>2</sub>)<sub>3</sub>CH(CH<sub>2</sub>)<sub>3</sub>CH<sub>3</sub>**

|   |             |             |             |
|---|-------------|-------------|-------------|
| C | -5.07814800 | 0.01561200  | 0.32453200  |
| H | -5.06555100 | 1.10847900  | 0.32850600  |
| H | -5.13945300 | -0.31881400 | 1.36346100  |
| H | -5.98723700 | -0.30818400 | -0.18601300 |
| C | -3.82625200 | -0.53822700 | -0.35078400 |
| H | -3.86510500 | -1.63309900 | -0.36044400 |
| H | -3.80233900 | -0.22128100 | -1.39935700 |
| C | -2.54149300 | -0.08471200 | 0.33813100  |
| H | -2.56533700 | -0.39392700 | 1.39017600  |
| H | -2.49046900 | 1.01026900  | 0.33864000  |
| C | -1.28187600 | -0.64131400 | -0.32073900 |
| H | -1.27073000 | -0.36367800 | -1.38297800 |
| H | -1.30737100 | -1.73888900 | -0.29572000 |
| C | 0.00071400  | -0.16340800 | 0.33729700  |
| H | -0.00013100 | -0.37671200 | 1.41284000  |
| H | 0.00354600  | 0.99347900  | 0.30304200  |
| C | 1.28280200  | -0.64358000 | -0.31982300 |
| H | 1.27032800  | -0.37028600 | -1.38298700 |
| H | 1.30942200  | -1.74104200 | -0.28899700 |
| C | 2.54197700  | -0.08156700 | 0.33516100  |
| H | 2.56440000  | -0.38012900 | 1.39036700  |
| H | 2.49122100  | 1.01327800  | 0.32362200  |
| C | 3.82722800  | -0.54312100 | -0.34741300 |
| H | 3.80397300  | -0.23876400 | -1.39971300 |
| H | 3.86642700  | -1.63803500 | -0.34375800 |
| C | 5.07847300  | 0.01920400  | 0.32213000  |
| H | 5.13778900  | -0.30072100 | 1.36576700  |
| H | 5.98822100  | -0.31224900 | -0.18230500 |
| H | 5.06651000  | 1.11202200  | 0.31086400  |
| O | 0.00352000  | 2.37045800  | -0.25389300 |
| H | -0.05682400 | 2.10131000  | -1.18482200 |

**3.1.10 C<sub>10</sub> (*n*-C<sub>10</sub>H<sub>22</sub>)**

**OH-R26: OH + CH<sub>3</sub>(CH<sub>2</sub>)<sub>8</sub>CH<sub>3</sub> → H<sub>2</sub>O + CH<sub>2</sub>(CH<sub>2</sub>)<sub>8</sub>CH<sub>3</sub>**

*n*-C<sub>10</sub>H<sub>22</sub>

|   |             |             |             |
|---|-------------|-------------|-------------|
| C | 5.73542100  | -0.29095000 | -0.00038600 |
| H | 6.62285900  | 0.34508700  | -0.00081200 |
| H | 5.78299900  | -0.93488000 | -0.88260000 |
| H | 5.78344100  | -0.93432100 | 0.88221200  |
| C | 4.45022800  | 0.53328000  | -0.00032700 |
| H | 4.43206200  | 1.18932500  | -0.87743100 |
| H | 4.43243600  | 1.18979300  | 0.87643400  |
| C | 3.19580900  | -0.33769400 | 0.00016000  |
| H | 3.21279400  | -0.99602100 | -0.87716800 |
| H | 3.21314600  | -0.99557000 | 0.87781900  |
| C | 1.90035000  | 0.46998600  | 0.00020500  |
| H | 1.88358300  | 1.12761800  | -0.87747700 |
| H | 1.88374800  | 1.12780700  | 0.87774800  |
| C | 0.64803400  | -0.40352200 | 0.00039600  |
| H | 0.66504500  | -1.06119000 | 0.87801900  |
| H | 0.66491900  | -1.06135500 | -0.87710600 |
| C | -0.64803400 | 0.40352200  | 0.00040200  |
| H | -0.66492500 | 1.06135900  | -0.87709600 |
| H | -0.66503900 | 1.06118700  | 0.87802800  |
| C | -1.90034900 | -0.46998600 | 0.00021500  |
| H | -1.88374500 | -1.12780700 | 0.87775800  |
| H | -1.88358500 | -1.12761700 | -0.87746700 |
| C | -3.19580900 | 0.33769400  | 0.00017400  |
| H | -3.21279000 | 0.99603000  | -0.87714800 |
| H | -3.21315000 | 0.99556100  | 0.87784000  |
| C | -4.45022800 | -0.53328000 | -0.00032700 |
| H | -4.43244400 | -1.18979700 | 0.87643100  |
| H | -4.43205400 | -1.18932100 | -0.87743400 |
| C | -5.73542100 | 0.29094900  | -0.00039600 |
| H | -5.78298800 | 0.93488800  | -0.88260500 |
| H | -6.62285900 | -0.34508700 | -0.00084000 |
| H | -5.78345300 | 0.93431200  | 0.88220700  |

**CH<sub>2</sub>(CH<sub>2</sub>)<sub>8</sub>CH<sub>3</sub>**

|   |            |             |             |
|---|------------|-------------|-------------|
| C | 5.78500600 | 0.28015100  | -0.01535600 |
| H | 6.71539400 | -0.15974200 | -0.34841700 |
| H | 5.82499100 | 1.25839700  | 0.44803100  |
| C | 4.52352800 | -0.51015000 | 0.01035200  |
| H | 4.48870500 | -1.13958100 | 0.91493500  |
| H | 4.50519800 | -1.21211300 | -0.83145200 |
| C | 3.26651300 | 0.36230400  | -0.02098100 |
| H | 3.28930300 | 1.05337700  | 0.83002000  |
| H | 3.28301000 | 0.98223600  | -0.92433500 |



|   |             |             |             |
|---|-------------|-------------|-------------|
| C | 1.97536300  | -0.45038700 | 0.01822200  |
| H | 1.96409900  | -1.07182700 | 0.92201600  |
| H | 1.95780400  | -1.14323300 | -0.83190200 |
| C | 0.71997800  | 0.41796500  | -0.01383600 |
| H | 0.73494800  | 1.04376200  | -0.91439200 |
| H | 0.73382000  | 1.10666000  | 0.83962300  |
| C | -0.57240700 | -0.39449200 | 0.01413900  |
| H | -0.58660500 | -1.02211800 | 0.91353100  |
| H | -0.58632500 | -1.08170300 | -0.84055800 |
| C | -1.82865100 | 0.47278900  | -0.01596200 |
| H | -1.81394100 | 1.10161100  | -0.91452900 |
| H | -1.81596000 | 1.15882000  | 0.83972300  |
| C | -3.12022100 | -0.34068700 | 0.00925400  |
| H | -3.13467000 | -0.97080000 | 0.90710500  |
| H | -3.13405800 | -1.02627700 | -0.84696100 |
| C | -4.37869600 | 0.52395500  | -0.01868900 |
| H | -4.36437600 | 1.15105500  | -0.91679200 |
| H | -4.36293500 | 1.20887900  | 0.83604600  |
| C | -5.66005500 | -0.30565900 | 0.01022500  |
| H | -5.70322100 | -0.92077400 | 0.91300100  |
| H | -6.55030200 | 0.32617300  | -0.00804000 |
| H | -5.70703100 | -0.97753700 | -0.85086300 |

**TS26: OH + CH<sub>3</sub>(CH<sub>2</sub>)<sub>8</sub>CH<sub>3</sub> → H<sub>2</sub>O + CH<sub>2</sub>(CH<sub>2</sub>)<sub>8</sub>CH<sub>3</sub>**

|   |             |             |             |
|---|-------------|-------------|-------------|
| C | -4.93835500 | 0.73569800  | 0.00274400  |
| H | -5.90863800 | 0.09526200  | -0.10392800 |
| H | -4.98393100 | 1.41785500  | -0.84898300 |
| H | -5.04518900 | 1.29335400  | 0.93513800  |
| C | -3.71681400 | -0.16210100 | -0.02323100 |
| H | -3.73582800 | -0.78247900 | -0.92482300 |
| H | -3.73879900 | -0.84827700 | 0.83085300  |
| C | -2.41215300 | 0.63815800  | 0.01369200  |
| H | -2.38443300 | 1.31958600  | -0.84468700 |
| H | -2.39801700 | 1.26915300  | 0.91028300  |
| C | -1.16969100 | -0.24934900 | -0.00331700 |
| H | -1.19201200 | -0.88709900 | -0.89511200 |
| H | -1.19417800 | -0.92507100 | 0.86013900  |
| C | 0.13253500  | 0.54764900  | 0.01534100  |
| H | 0.15298900  | 1.18813400  | 0.90544100  |
| H | 0.15626600  | 1.22167400  | -0.84948100 |
| C | 1.37739200  | -0.33621300 | 0.00013300  |
| H | 1.35442500  | -0.97987500 | -0.88760900 |
| H | 1.35665200  | -1.00726100 | 0.86742100  |

|   |             |             |             |
|---|-------------|-------------|-------------|
| C | 2.67926100  | 0.46150900  | 0.01058400  |
| H | 2.70201500  | 1.10608400  | 0.89776100  |
| H | 2.69977600  | 1.13190000  | -0.85725700 |
| C | 3.92480600  | -0.42097800 | -0.00439900 |
| H | 3.90198800  | -1.06694400 | -0.89071700 |
| H | 3.90624100  | -1.09071500 | 0.86418100  |
| C | 5.22755900  | 0.37587900  | 0.00305400  |
| H | 5.24911100  | 1.02025300  | 0.88871300  |
| H | 5.24450300  | 1.04396100  | -0.86492200 |
| C | 6.46332700  | -0.52044200 | -0.01266500 |
| H | 6.47224800  | -1.15385200 | -0.90366100 |
| H | 7.38517500  | 0.06450800  | -0.00782200 |
| H | 6.47773100  | -1.17726800 | 0.86109900  |
| O | -6.91454400 | -0.90837100 | -0.07915800 |
| H | -6.56894600 | -1.40477200 | 0.67961600  |

**OH-R27: OH + CH<sub>3</sub>(CH<sub>2</sub>)<sub>8</sub>CH<sub>3</sub> → H<sub>2</sub>O + CH<sub>3</sub>CH(CH<sub>2</sub>)<sub>7</sub>CH<sub>3</sub>**  
**CH<sub>3</sub>CH(CH<sub>2</sub>)<sub>7</sub>CH<sub>3</sub>**

|   |             |             |             |
|---|-------------|-------------|-------------|
| C | -5.81704200 | -0.15806800 | 0.14069000  |
| H | -6.60184600 | 0.58050200  | 0.31062100  |
| H | -5.81307600 | -0.85421800 | 0.98654700  |
| H | -6.10705700 | -0.74637200 | -0.74293400 |
| C | -4.48151700 | 0.47772300  | -0.03630900 |
| H | -4.42408000 | 1.50084500  | -0.39255200 |
| C | -3.24661700 | -0.35669600 | -0.07143800 |
| H | -3.26659300 | -1.07325500 | 0.76182400  |
| H | -3.23698700 | -0.97886600 | -0.98313100 |
| C | -1.95403800 | 0.45693500  | -0.01573300 |
| H | -1.95196200 | 1.06376600  | 0.89681900  |
| H | -1.93676500 | 1.16081600  | -0.85625800 |
| C | -0.69910500 | -0.41065900 | -0.05552700 |
| H | -0.70657500 | -1.01939700 | -0.96796000 |
| H | -0.71933100 | -1.11557600 | 0.78457900  |
| C | 0.59290800  | 0.40083100  | -0.00079100 |
| H | 0.59862600  | 1.01186000  | 0.90996700  |
| H | 0.61536600  | 1.10359000  | -0.84255600 |
| C | 1.84885000  | -0.46676200 | -0.03421600 |
| H | 1.84408400  | -1.07714700 | -0.94551900 |
| H | 1.82516300  | -1.17026100 | 0.80696600  |
| C | 3.14100300  | 0.34397600  | 0.02360000  |
| H | 3.14555400  | 0.95521000  | 0.93448700  |
| H | 3.16656600  | 1.04734700  | -0.81780300 |
| C | 4.39818900  | -0.52246800 | -0.00686600 |

|   |            |             |             |
|---|------------|-------------|-------------|
| H | 4.39478400 | -1.12899900 | -0.91908100 |
| H | 4.36907000 | -1.22675000 | 0.83165700  |
| C | 5.68079700 | 0.30289600  | 0.05904100  |
| H | 5.71318400 | 0.89649800  | 0.97652900  |
| H | 6.56975300 | -0.33069500 | 0.03820200  |
| H | 5.74155700 | 0.99484500  | -0.78511300 |

**TS27: OH + CH<sub>3</sub>(CH<sub>2</sub>)<sub>8</sub>CH<sub>3</sub> → H<sub>2</sub>O + CH<sub>3</sub>CH(CH<sub>2</sub>)<sub>7</sub>CH<sub>3</sub>**

|   |             |             |             |
|---|-------------|-------------|-------------|
| C | -5.27885600 | -0.92158200 | -0.07973800 |
| H | -6.17915500 | -0.42866100 | 0.28991200  |
| H | -5.28930400 | -1.95747900 | 0.27416900  |
| H | -5.32426200 | -0.94030400 | -1.17091400 |
| C | -4.02097600 | -0.21483600 | 0.39390400  |
| H | -4.00272400 | -0.11675400 | 1.48442700  |
| H | -4.07661700 | 0.86388900  | -0.00549000 |
| C | -2.72395500 | -0.81702600 | -0.11852000 |
| H | -2.64531500 | -1.84846400 | 0.25135900  |
| H | -2.76403000 | -0.88201300 | -1.21193600 |
| C | -1.48531900 | -0.02981500 | 0.30131000  |
| H | -1.46928300 | 0.06622800  | 1.39440900  |
| H | -1.55863200 | 0.98608900  | -0.10419400 |
| C | -0.18051500 | -0.66869700 | -0.16688800 |
| H | -0.20110300 | -0.77431400 | -1.25823100 |
| H | -0.10599200 | -1.68460100 | 0.23983200  |
| C | 1.05577700  | 0.12950600  | 0.23979700  |
| H | 1.07383000  | 0.23963000  | 1.33105600  |
| H | 0.98149600  | 1.14389800  | -0.17064100 |
| C | 2.36276100  | -0.50807300 | -0.22443000 |
| H | 2.34263400  | -0.62249500 | -1.31507000 |
| H | 2.43998500  | -1.52094800 | 0.18945200  |
| C | 3.59763100  | 0.29547300  | 0.17554300  |
| H | 3.61914000  | 0.41002200  | 1.26638700  |
| H | 3.51992300  | 1.30874700  | -0.23758800 |
| C | 4.90653200  | -0.33814900 | -0.28970900 |
| H | 4.88355100  | -0.45167100 | -1.37902300 |
| H | 4.98384300  | -1.34963100 | 0.12384600  |
| C | 6.13039800  | 0.47880500  | 0.11721200  |
| H | 6.18831900  | 0.57679400  | 1.20456700  |
| H | 7.05710500  | 0.01577300  | -0.22753600 |
| H | 6.08176100  | 1.48654200  | -0.30381500 |
| O | -4.02066100 | 2.30340900  | -0.39514300 |
| H | -3.57075900 | 2.61881600  | 0.40527100  |

**OH-R28: OH + CH<sub>3</sub>(CH<sub>2</sub>)<sub>8</sub>CH<sub>3</sub> → H<sub>2</sub>O + CH<sub>3</sub>CH<sub>2</sub>CH(CH<sub>2</sub>)<sub>6</sub>CH<sub>3</sub>**  
**CH<sub>3</sub>CH<sub>2</sub>CH(CH<sub>2</sub>)<sub>6</sub>CH<sub>3</sub>**

|   |             |             |             |
|---|-------------|-------------|-------------|
| C | 5.71245100  | 0.46986700  | 0.13586400  |
| H | 6.65375900  | -0.06628800 | 0.26850800  |
| H | 5.59347900  | 1.16167000  | 0.97278900  |
| H | 5.78816100  | 1.06238100  | -0.77927700 |
| C | 4.52639900  | -0.48978800 | 0.05762900  |
| H | 4.48363900  | -1.10731400 | 0.96462700  |
| H | 4.68931300  | -1.20397800 | -0.76603200 |
| C | 3.22076000  | 0.20608700  | -0.12827000 |
| H | 3.22078200  | 1.21020200  | -0.54412900 |
| C | 1.93575500  | -0.54827600 | -0.08589100 |
| H | 1.93032900  | -1.21544700 | 0.78738900  |
| H | 1.86431200  | -1.21922300 | -0.95938000 |
| C | 0.69933800  | 0.34985500  | -0.05177200 |
| H | 0.71237900  | 1.01099800  | -0.92638500 |
| H | 0.75202300  | 0.99984200  | 0.82902100  |
| C | -0.60952000 | -0.43470100 | -0.03081100 |
| H | -0.62138400 | -1.09782200 | 0.84278800  |
| H | -0.65537100 | -1.08614200 | -0.91218500 |
| C | -1.84550700 | 0.46107200  | -0.00095600 |
| H | -1.83145300 | 1.12681300  | -0.87251300 |
| H | -1.80280900 | 1.10977500  | 0.88242000  |
| C | -3.15484200 | -0.32378900 | 0.01237600  |
| H | -3.17049000 | -0.98900000 | 0.88449200  |
| H | -3.19649600 | -0.97394900 | -0.87025100 |
| C | -4.39349100 | 0.56896200  | 0.03833400  |
| H | -4.37553800 | 1.23379300  | -0.83210600 |
| H | -4.35265600 | 1.21582400  | 0.92150100  |
| C | -5.69285000 | -0.23265000 | 0.04706900  |
| H | -5.74082100 | -0.88416900 | 0.92365500  |
| H | -6.56888900 | 0.41870700  | 0.06455500  |
| H | -5.76323600 | -0.86650700 | -0.84092100 |

**TS28: OH + CH<sub>3</sub>(CH<sub>2</sub>)<sub>8</sub>CH<sub>3</sub> → H<sub>2</sub>O + CH<sub>3</sub>CH<sub>2</sub>CH(CH<sub>2</sub>)<sub>6</sub>CH<sub>3</sub>**

|   |            |             |             |
|---|------------|-------------|-------------|
| C | 5.39946100 | -0.27926700 | 0.28892800  |
| H | 6.28621400 | -0.66912700 | -0.21396400 |
| H | 5.46091700 | -0.55895300 | 1.34379200  |
| H | 5.42125000 | 0.81137800  | 0.22994000  |
| C | 4.11749900 | -0.81933800 | -0.33938900 |
| H | 4.10378700 | -1.91483300 | -0.28610300 |
| H | 4.08834000 | -0.56507500 | -1.40534600 |

|   |             |             |             |
|---|-------------|-------------|-------------|
| C | 2.86739000  | -0.28174800 | 0.33554400  |
| H | 2.87804200  | -0.48707500 | 1.41274900  |
| H | 2.92125400  | 0.87359700  | 0.29278700  |
| C | 1.55302200  | -0.70787400 | -0.29424900 |
| H | 1.48351700  | -1.80353500 | -0.26925100 |
| H | 1.55164800  | -0.42995400 | -1.35656800 |
| C | 0.33229900  | -0.10119200 | 0.39376800  |
| H | 0.43706600  | 0.98982600  | 0.40853900  |
| H | 0.31206800  | -0.42434700 | 1.44149400  |
| C | -0.98344400 | -0.48177200 | -0.27974300 |
| H | -1.07505000 | -1.57444100 | -0.31346000 |
| H | -0.96742300 | -0.14241400 | -1.32282600 |
| C | -2.20578100 | 0.10561600  | 0.42132200  |
| H | -2.10355000 | 1.19639300  | 0.47263900  |
| H | -2.23415800 | -0.24942000 | 1.45863900  |
| C | -3.52087000 | -0.24621300 | -0.26913200 |
| H | -3.62289300 | -1.33715900 | -0.32505300 |
| H | -3.49356700 | 0.11293100  | -1.30532400 |
| C | -4.74435900 | 0.33840100  | 0.43293100  |
| H | -4.63666400 | 1.42686900  | 0.49406400  |
| H | -4.77518200 | -0.02652800 | 1.46531000  |
| C | -6.05047500 | -0.01079600 | -0.27592900 |
| H | -6.19156000 | -1.09398300 | -0.32048300 |
| H | -6.91385200 | 0.41889000  | 0.23588100  |
| H | -6.04772000 | 0.36547500  | -1.30229900 |
| O | 2.96546800  | 2.24971200  | -0.26645000 |
| H | 2.80530500  | 1.98887300  | -1.18786700 |

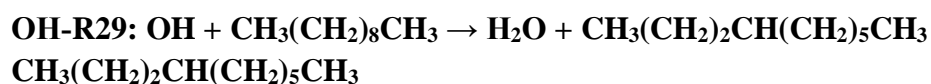

|   |             |             |             |
|---|-------------|-------------|-------------|
| C | -5.75697900 | -0.06676800 | 0.22071900  |
| H | -6.56416100 | 0.66191700  | 0.31713000  |
| H | -5.77185000 | -0.70290800 | 1.10973500  |
| H | -5.97735400 | -0.69919300 | -0.64345400 |
| C | -4.40144600 | 0.61608900  | 0.06468800  |
| H | -4.20983700 | 1.26861200  | 0.92237600  |
| H | -4.41023900 | 1.26085400  | -0.82048000 |
| C | -3.25184100 | -0.38420200 | -0.06210900 |
| H | -3.23885700 | -1.04133000 | 0.81868900  |
| H | -3.45699900 | -1.05344200 | -0.91569100 |
| C | -1.91717800 | 0.25922600  | -0.22374400 |
| H | -1.87058900 | 1.25253000  | -0.66273800 |
| C | -0.66000500 | -0.53685800 | -0.13362100 |

|   |             |             |             |
|---|-------------|-------------|-------------|
| H | -0.58878900 | -1.22800500 | -0.99123700 |
| H | -0.69781300 | -1.18531400 | 0.75279100  |
| C | 0.60380900  | 0.32176900  | -0.08646900 |
| H | 0.55141700  | 0.98938800  | 0.78106900  |
| H | 0.63104300  | 0.96697400  | -0.97263400 |
| C | 1.88699100  | -0.50175400 | -0.02135900 |
| H | 1.93329700  | -1.16958600 | -0.89036500 |
| H | 1.85962800  | -1.14948500 | 0.86341700  |
| C | 3.14778500  | 0.35788800  | 0.02175600  |
| H | 3.10694700  | 1.02004200  | 0.89535000  |
| H | 3.17026400  | 1.01219400  | -0.85843700 |
| C | 4.43536600  | -0.46166200 | 0.07146000  |
| H | 4.47414700  | -1.12170100 | -0.80199200 |
| H | 4.41276800  | -1.11466000 | 0.95074500  |
| C | 5.68572000  | 0.41347300  | 0.11194400  |
| H | 5.68102800  | 1.05737800  | 0.99540700  |
| H | 6.59721300  | -0.18696600 | 0.13933100  |
| H | 5.73541300  | 1.05950200  | -0.76860400 |

**TS29: OH + CH<sub>3</sub>(CH<sub>2</sub>)<sub>8</sub>CH<sub>3</sub> → H<sub>2</sub>O + CH<sub>3</sub>(CH<sub>2</sub>)<sub>2</sub>CH(CH<sub>2</sub>)<sub>5</sub>CH<sub>3</sub>**

|   |             |             |             |
|---|-------------|-------------|-------------|
| C | 5.54985800  | -0.60227100 | -0.15974700 |
| H | 6.43165400  | -0.08229400 | 0.21940800  |
| H | 5.57857600  | -0.55722800 | -1.25149500 |
| H | 5.62882400  | -1.65312500 | 0.13172900  |
| C | 4.26131100  | 0.01754500  | 0.37394800  |
| H | 4.20417300  | 1.07206300  | 0.08549700  |
| H | 4.26463400  | -0.00757300 | 1.46924700  |
| C | 3.01368700  | -0.69814000 | -0.13888500 |
| H | 3.01597300  | -0.69726000 | -1.23505700 |
| H | 3.03958400  | -1.75206100 | 0.17043800  |
| C | 1.72216300  | -0.07010100 | 0.35606800  |
| H | 1.73436500  | 1.01689400  | -0.02045900 |
| H | 1.71298900  | 0.00378300  | 1.45004000  |
| C | 0.44496200  | -0.70932500 | -0.16031400 |
| H | 0.39640700  | -1.74534900 | 0.20106100  |
| H | 0.48489200  | -0.76325600 | -1.25419800 |
| C | -0.81504900 | 0.03963400  | 0.26689000  |
| H | -0.76685000 | 1.06233000  | -0.12528200 |
| H | -0.83532000 | 0.12211800  | 1.36095400  |
| C | -2.10180000 | -0.62724100 | -0.21192400 |
| H | -2.15222900 | -1.64851300 | 0.18496600  |
| H | -2.07487600 | -0.72207400 | -1.30417400 |
| C | -3.35905100 | 0.13575800  | 0.19718800  |

|   |             |             |             |
|---|-------------|-------------|-------------|
| H | -3.30924500 | 1.15588600  | -0.20293500 |
| H | -3.38510900 | 0.23512400  | 1.28948800  |
| C | -4.64882800 | -0.52866400 | -0.27839100 |
| H | -4.69972900 | -1.54586500 | 0.12499000  |
| H | -4.61939400 | -0.63062100 | -1.36867200 |
| C | -5.89560300 | 0.25074500  | 0.13234700  |
| H | -5.87499300 | 1.26227700  | -0.28167800 |
| H | -6.80838400 | -0.23588800 | -0.21689800 |
| H | -5.95780500 | 0.33940700  | 1.22029000  |
| O | 1.70820400  | 2.46671200  | -0.41423100 |
| H | 1.29633300  | 2.78987900  | 0.40350300  |

**OH-R30: OH + CH<sub>3</sub>(CH<sub>2</sub>)<sub>8</sub>CH<sub>3</sub> → H<sub>2</sub>O + CH<sub>3</sub>(CH<sub>2</sub>)<sub>3</sub>CH(CH<sub>2</sub>)<sub>4</sub>CH<sub>3</sub>  
CH<sub>3</sub>(CH<sub>2</sub>)<sub>3</sub>CH(CH<sub>2</sub>)<sub>4</sub>CH<sub>3</sub>**

|   |             |             |             |
|---|-------------|-------------|-------------|
| C | 5.67665500  | 0.50502600  | 0.20223900  |
| H | 6.59933000  | -0.04116200 | 0.40710200  |
| H | 5.56384000  | 1.27430300  | 0.97064300  |
| H | 5.79332100  | 1.01177700  | -0.75922600 |
| C | 4.46440400  | -0.42264400 | 0.18333100  |
| H | 4.39106300  | -0.95343900 | 1.13874300  |
| H | 4.59737800  | -1.19037800 | -0.58671300 |
| C | 3.15957800  | 0.32694400  | -0.07209500 |
| H | 3.01975600  | 1.08998800  | 0.70213400  |
| H | 3.22847300  | 0.86300000  | -1.02623200 |
| C | 1.93593500  | -0.58837600 | -0.09765800 |
| H | 1.88142800  | -1.15528800 | 0.84241300  |
| H | 2.07752400  | -1.35037800 | -0.88320700 |
| C | 0.65185500  | 0.13799200  | -0.31315300 |
| H | 0.67852400  | 1.10632300  | -0.80650000 |
| C | -0.66060400 | -0.55530800 | -0.17560800 |
| H | -0.64831300 | -1.18869700 | 0.72195100  |
| H | -0.81011500 | -1.25376900 | -1.01709800 |
| C | -1.85303200 | 0.39927200  | -0.11076500 |
| H | -1.86237300 | 1.02474500  | -1.01123200 |
| H | -1.71991500 | 1.08046600  | 0.73728600  |
| C | -3.19069000 | -0.32321600 | 0.01845100  |
| H | -3.17969800 | -0.95058200 | 0.91820500  |
| H | -3.31889400 | -1.00664800 | -0.83009400 |
| C | -4.38359700 | 0.62765300  | 0.08427500  |
| H | -4.39467500 | 1.25299700  | -0.81496100 |
| H | -4.25341900 | 1.30937300  | 0.93173000  |
| C | -5.71395600 | -0.10924600 | 0.21647800  |
| H | -5.72954500 | -0.72278000 | 1.12116900  |

|   |             |             |             |
|---|-------------|-------------|-------------|
| H | -6.55531700 | 0.58456300  | 0.26748300  |
| H | -5.87766000 | -0.77300300 | -0.63655900 |

**TS30: OH + CH<sub>3</sub>(CH<sub>2</sub>)<sub>8</sub>CH<sub>3</sub> → H<sub>2</sub>O + CH<sub>3</sub>(CH<sub>2</sub>)<sub>3</sub>CH(CH<sub>2</sub>)<sub>4</sub>CH<sub>3</sub>**

|   |             |             |             |
|---|-------------|-------------|-------------|
| C | -5.65829500 | -0.05192400 | 0.25437600  |
| H | -6.55166100 | -0.41804800 | -0.25529400 |
| H | -5.67028900 | 1.04015100  | 0.21181400  |
| H | -5.72859100 | -0.34315100 | 1.30569500  |
| C | -4.38342900 | -0.60478400 | -0.37748300 |
| H | -4.34711400 | -0.32767300 | -1.43693100 |
| H | -4.39984100 | -1.69979700 | -0.34549000 |
| C | -3.12114900 | -0.09825500 | 0.31600800  |
| H | -3.09396200 | 0.99682800  | 0.27829300  |
| H | -3.15655500 | -0.37111100 | 1.37778700  |
| C | -1.83777200 | -0.64789700 | -0.30147100 |
| H | -1.80972100 | -0.39848300 | -1.37017200 |
| H | -1.84181600 | -1.74469500 | -0.24588500 |
| C | -0.57981800 | -0.12513700 | 0.36981100  |
| H | -0.59707200 | -0.31355100 | 1.44984800  |
| H | -0.60606600 | 1.03021900  | 0.30873800  |
| C | 0.72642800  | -0.58993700 | -0.24980500 |
| H | 0.73033000  | -0.34168900 | -1.31923400 |
| H | 0.77744600  | -1.68553100 | -0.19347600 |
| C | 1.95869000  | 0.01558700  | 0.41818400  |
| H | 1.96384700  | -0.25774900 | 1.48027300  |
| H | 1.88340800  | 1.10843700  | 0.38003900  |
| C | 3.26735800  | -0.43302500 | -0.22621800 |
| H | 3.26136900  | -0.16005500 | -1.28892500 |
| H | 3.33681200  | -1.52745700 | -0.19093100 |
| C | 4.50155100  | 0.17143600  | 0.43941100  |
| H | 4.50999000  | -0.10539100 | 1.49933300  |
| H | 4.42726500  | 1.26373400  | 0.40702800  |
| C | 5.80269900  | -0.27683800 | -0.22087500 |
| H | 5.82330600  | 0.01293900  | -1.27492300 |
| H | 6.67403600  | 0.16641000  | 0.26510300  |
| H | 5.90900300  | -1.36395600 | -0.17402800 |
| O | -0.62432300 | 2.39672500  | -0.27499700 |
| H | -0.55711600 | 2.11046200  | -1.20031500 |

**3.1.11 C11 (*n*-C<sub>11</sub>H<sub>24</sub>)**

**OH-R31: OH + CH<sub>3</sub>(CH<sub>2</sub>)<sub>9</sub>CH<sub>3</sub> → H<sub>2</sub>O + CH<sub>2</sub>(CH<sub>2</sub>)<sub>9</sub>CH<sub>3</sub>**

***n*-C<sub>11</sub>H<sub>24</sub>**

|   |             |             |             |
|---|-------------|-------------|-------------|
| C | -6.36257300 | -0.39256700 | -0.00038000 |
|---|-------------|-------------|-------------|



|   |             |             |             |
|---|-------------|-------------|-------------|
| H | -6.39293700 | -1.03732800 | 0.88197400  |
| H | -6.39268600 | -1.03713200 | -0.88288500 |
| H | -7.26703900 | 0.21903600  | -0.00044100 |
| C | -5.10059100 | 0.46680400  | -0.00010600 |
| H | -5.10034200 | 1.12340100  | -0.87697800 |
| H | -5.10059600 | 1.12322000  | 0.87690100  |
| C | -3.82254300 | -0.36913400 | -0.00000900 |
| H | -3.82168400 | -1.02740100 | -0.87753800 |
| H | -3.82187200 | -1.02748900 | 0.87745500  |
| C | -2.54983100 | 0.47398400  | 0.00016200  |
| H | -2.55101100 | 1.13183400  | 0.87782300  |
| H | -2.55082700 | 1.13189400  | -0.87745500 |
| C | -1.27419500 | -0.36510800 | 0.00026300  |
| H | -1.27366700 | -1.02315200 | -0.87723700 |
| H | -1.27372300 | -1.02303800 | 0.87784900  |
| C | 0.00000000  | 0.47610400  | 0.00023800  |
| H | -0.00002000 | 1.13405300  | 0.87780800  |
| H | 0.00002100  | 1.13391100  | -0.87743800 |
| C | 1.27419500  | -0.36510900 | 0.00032900  |
| H | 1.27363700  | -1.02327200 | -0.87708200 |
| H | 1.27375200  | -1.02292000 | 0.87800400  |
| C | 2.54983100  | 0.47398200  | 0.00006500  |
| H | 2.55098900  | 1.13204700  | 0.87756600  |
| H | 2.55084900  | 1.13167900  | -0.87771200 |
| C | 3.82254300  | -0.36913500 | 0.00013400  |
| H | 3.82164300  | -1.02771700 | -0.87715900 |
| H | 3.82191400  | -1.02717400 | 0.87783400  |
| C | 5.10059100  | 0.46680300  | -0.00032900 |
| H | 5.10061300  | 1.12358400  | 0.87640600  |
| H | 5.10032200  | 1.12303600  | -0.87747400 |
| C | 6.36257300  | -0.39256500 | -0.00027600 |
| H | 6.39263400  | -1.03754400 | -0.88248100 |
| H | 7.26703800  | 0.21903800  | -0.00067800 |
| H | 6.39299100  | -1.03691300 | 0.88237800  |

**CH<sub>2</sub>(CH<sub>2</sub>)<sub>9</sub>CH<sub>3</sub>**

|   |             |             |             |
|---|-------------|-------------|-------------|
| C | -6.41286700 | -0.38297200 | -0.02559600 |
| H | -6.42769000 | -1.35811800 | 0.44578000  |
| H | -7.35326000 | 0.02742300  | -0.36807500 |
| C | -5.17412100 | 0.44242500  | 0.00001500  |
| H | -5.17167600 | 1.13889700  | -0.84652200 |
| H | -5.16026700 | 1.07853800  | 0.90041800  |
| C | -3.89337400 | -0.39522200 | -0.02039100 |

|   |             |             |             |
|---|-------------|-------------|-------------|
| H | -3.88951800 | -1.02138800 | -0.91958500 |
| H | -3.90075300 | -1.08097300 | 0.83518300  |
| C | -2.62494300 | 0.45255500  | 0.01823600  |
| H | -2.63325200 | 1.07950900  | 0.91823700  |
| H | -2.62301500 | 1.14034500  | -0.83615500 |
| C | -1.34677200 | -0.38221000 | -0.00444500 |
| H | -1.34283800 | -1.01375200 | -0.90110300 |
| H | -1.34525000 | -1.06579100 | 0.85323300  |
| C | -0.07591600 | 0.46361400  | 0.02199100  |
| H | -0.07912300 | 1.09585100  | 0.91824900  |
| H | -0.07780600 | 1.14655100  | -0.83624500 |
| C | 1.20158700  | -0.37217700 | -0.00185600 |
| H | 1.20232800  | -1.00688600 | -0.89637400 |
| H | 1.20526500  | -1.05293900 | 0.85808800  |
| C | 2.47353000  | 0.47225600  | 0.01793400  |
| H | 2.47415300  | 1.10629700  | 0.91295400  |
| H | 2.46929100  | 1.15355800  | -0.84162300 |
| C | 3.75001900  | -0.36466000 | -0.00877600 |
| H | 3.74889900  | -0.99979000 | -0.90319700 |
| H | 3.75568300  | -1.04571700 | 0.85114100  |
| C | 5.02409300  | 0.47714800  | 0.00819300  |
| H | 5.02542100  | 1.10915800  | 0.90296100  |
| H | 5.01627500  | 1.15769700  | -0.85016000 |
| C | 6.29014700  | -0.37559400 | -0.02270600 |
| H | 6.31809300  | -0.99569900 | -0.92266000 |
| H | 7.19163000  | 0.24029600  | -0.01157500 |
| H | 6.32911700  | -1.04404800 | 0.84143900  |

**TS31: OH + CH<sub>3</sub>(CH<sub>2</sub>)<sub>9</sub>CH<sub>3</sub> → H<sub>2</sub>O + CH<sub>2</sub>(CH<sub>2</sub>)<sub>9</sub>CH<sub>3</sub>**

|   |            |             |             |
|---|------------|-------------|-------------|
| C | 5.56994400 | 0.77066200  | 0.00469000  |
| H | 5.66732000 | 1.32956300  | 0.93738900  |
| H | 5.60760600 | 1.45349700  | -0.84686900 |
| H | 6.54933300 | 0.14382000  | -0.10021400 |
| C | 4.36099500 | -0.14392300 | -0.02369200 |
| H | 4.38921800 | -0.76254900 | -0.92625800 |
| H | 4.39169300 | -0.83111500 | 0.82932700  |
| C | 3.04548600 | 0.63829100  | 0.01351100  |
| H | 3.00930800 | 1.32106300  | -0.84349700 |
| H | 3.02216400 | 1.26730800  | 0.91131800  |
| C | 1.81508500 | -0.26574600 | -0.00628000 |
| H | 1.84805300 | -0.94311600 | 0.85560900  |
| H | 1.84620700 | -0.90107800 | -0.89954700 |
| C | 0.50257200 | 0.51410400  | 0.01356600  |

|   |             |             |             |
|---|-------------|-------------|-------------|
| H | 0.47048700  | 1.18964600  | -0.84981500 |
| H | 0.47379200  | 1.15250700  | 0.90495200  |
| C | -0.73113000 | -0.38518200 | -0.00371000 |
| H | -0.70226300 | -1.05780000 | 0.86214400  |
| H | -0.70041200 | -1.02658200 | -0.89287400 |
| C | -2.04221300 | 0.39715000  | 0.00854400  |
| H | -2.07069500 | 1.06879900  | -0.85808100 |
| H | -2.07174500 | 1.04004600  | 0.89673200  |
| C | -3.27828300 | -0.49889300 | -0.00713200 |
| H | -3.25098700 | -1.16999900 | 0.85999800  |
| H | -3.24917600 | -1.14218500 | -0.89505100 |
| C | -4.58755900 | 0.28611800  | 0.00397200  |
| H | -4.61531500 | 0.95733600  | -0.86323700 |
| H | -4.61654200 | 0.93025500  | 0.89147900  |
| C | -5.82684000 | -0.60600600 | -0.01079600 |
| H | -5.79776400 | -1.27623500 | 0.85519900  |
| H | -5.79802300 | -1.24736900 | -0.89842100 |
| C | -7.12568700 | 0.19635400  | 0.00276700  |
| H | -7.18486600 | 0.85350100  | -0.86890900 |
| H | -8.00228600 | -0.45437500 | -0.00736500 |
| H | -7.18392100 | 0.82456600  | 0.89562700  |
| O | 7.56646100  | -0.84815500 | -0.07524200 |
| H | 7.22290200  | -1.35184300 | 0.67965300  |

**OH-R32: OH + CH<sub>3</sub>(CH<sub>2</sub>)<sub>9</sub>CH<sub>3</sub> → H<sub>2</sub>O + CH<sub>3</sub>CH(CH<sub>2</sub>)<sub>8</sub>CH<sub>3</sub>**

**CH<sub>3</sub>CH(CH<sub>2</sub>)<sub>8</sub>CH<sub>3</sub>**

|   |             |             |             |
|---|-------------|-------------|-------------|
| C | -6.45289100 | -0.25534300 | -0.11652300 |
| H | -6.72501400 | -0.82758500 | 0.78318400  |
| H | -6.43683400 | -0.97232100 | -0.94459800 |
| H | -7.25555900 | 0.46033000  | -0.30051200 |
| C | -5.13170100 | 0.41561900  | 0.03674900  |
| H | -5.09612500 | 1.44522600  | 0.37687100  |
| C | -3.87619200 | -0.38755600 | 0.07126700  |
| H | -3.88174800 | -1.10948900 | -0.75764500 |
| H | -3.84756800 | -1.00387900 | 0.98653700  |
| C | -2.60462400 | 0.45772100  | 0.00534400  |
| H | -2.60076700 | 1.16523100  | 0.84297600  |
| H | -2.62197400 | 1.06061400  | -0.90965100 |
| C | -1.32814100 | -0.37796300 | 0.04252100  |
| H | -1.33212000 | -1.08326500 | -0.79747300 |
| H | -1.31881000 | -0.98653400 | 0.95505300  |
| C | -0.05704300 | 0.46584800  | -0.01401200 |
| H | -0.05131800 | 1.16838100  | 0.82822900  |

|   |             |             |             |
|---|-------------|-------------|-------------|
| H | -0.06752600 | 1.07733700  | -0.92441900 |
| C | 1.22020900  | -0.37003700 | 0.01808800  |
| H | 1.21703400  | -1.06896200 | -0.82715900 |
| H | 1.22752100  | -0.98561700 | 0.92585700  |
| C | 2.49220900  | 0.47313000  | -0.02948700 |
| H | 2.49495800  | 1.17204100  | 0.81581400  |
| H | 2.48593300  | 1.08867300  | -0.93728700 |
| C | 3.76873500  | -0.36344400 | 0.00448700  |
| H | 3.76869600  | -1.06065600 | -0.84239600 |
| H | 3.77343100  | -0.98159400 | 0.91071500  |
| C | 5.04265300  | 0.47772300  | -0.03672300 |
| H | 5.03997400  | 1.17471300  | 0.80834700  |
| H | 5.03856300  | 1.09245100  | -0.94343300 |
| C | 6.30900400  | -0.37415500 | 0.00315800  |
| H | 6.34430900  | -1.05782200 | -0.84912100 |
| H | 7.21025900  | 0.24162700  | -0.02295900 |
| H | 6.34136800  | -0.97815900 | 0.91384500  |

**TS32: OH + CH<sub>3</sub>(CH<sub>2</sub>)<sub>9</sub>CH<sub>3</sub> → H<sub>2</sub>O + CH<sub>3</sub>CH(CH<sub>2</sub>)<sub>8</sub>CH<sub>3</sub>**

|   |             |             |             |
|---|-------------|-------------|-------------|
| C | 5.88381500  | -0.95494000 | -0.12265600 |
| H | 5.91319300  | -0.98021200 | -1.21423600 |
| H | 5.88941100  | -1.98887300 | 0.23701600  |
| H | 6.79408400  | -0.46866700 | 0.23109300  |
| C | 4.63984900  | -0.23325200 | 0.36502000  |
| H | 4.63830000  | -0.12898500 | 1.45509800  |
| H | 4.70064100  | 0.84268600  | -0.04109200 |
| C | 3.32977600  | -0.82534900 | -0.12541200 |
| H | 3.24632000  | -1.85389000 | 0.25141000  |
| H | 3.35353700  | -0.89683500 | -1.21887200 |
| C | 2.10498100  | -0.02376600 | 0.30760600  |
| H | 2.18218200  | 0.98910600  | -0.10477700 |
| H | 2.10559000  | 0.07862600  | 1.40022800  |
| C | 0.78755100  | -0.65273400 | -0.13814100 |
| H | 0.70919000  | -1.66551900 | 0.27560500  |
| H | 0.79163600  | -0.76495000 | -1.22898800 |
| C | -0.43533500 | 0.15944000  | 0.28118200  |
| H | -0.35777000 | 1.17049200  | -0.13688000 |
| H | -0.43661300 | 0.27667700  | 1.37183200  |
| C | -1.75443800 | -0.46937800 | -0.16005300 |
| H | -1.83506000 | -1.47851100 | 0.26222200  |
| H | -1.75049800 | -0.59191500 | -1.24994000 |
| C | -2.97664100 | 0.34826900  | 0.25091200  |
| H | -2.89573400 | 1.35687700  | -0.17258600 |

|   |             |             |             |
|---|-------------|-------------|-------------|
| H | -2.98044300 | 0.47226000  | 1.34075800  |
| C | -4.29608600 | -0.27963200 | -0.18998900 |
| H | -4.38042800 | -1.28684600 | 0.23657100  |
| H | -4.29116000 | -0.40772900 | -1.27943200 |
| C | -5.51883700 | 0.54121700  | 0.21403500  |
| H | -5.43294400 | 1.54641200  | -0.21300700 |
| H | -5.52307100 | 0.66826000  | 1.30210500  |
| C | -6.82981000 | -0.09895900 | -0.23480400 |
| H | -6.94830600 | -1.09269900 | 0.20539900  |
| H | -7.69301700 | 0.50209600  | 0.05804200  |
| H | -6.85413400 | -0.21361300 | -1.32172700 |
| O | 4.65412200  | 2.28082200  | -0.43716200 |
| H | 4.21317100  | 2.60367500  | 0.36525200  |

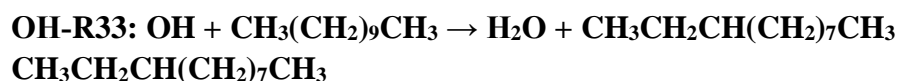

|   |             |             |             |
|---|-------------|-------------|-------------|
| C | 6.33529500  | -0.58235200 | 0.13300300  |
| H | 6.40448600  | -1.13369300 | -0.80799500 |
| H | 6.19010900  | -1.30882700 | 0.93577100  |
| H | 7.28909500  | -0.07825900 | 0.29827900  |
| C | 5.17619200  | 0.41149600  | 0.08980200  |
| H | 5.14406200  | 0.99062500  | 1.02230500  |
| H | 5.36321100  | 1.15587500  | -0.70132400 |
| C | 3.85291500  | -0.23883800 | -0.13249800 |
| H | 3.82737700  | -1.23082900 | -0.57594200 |
| C | 2.59087400  | 0.55285800  | -0.08404300 |
| H | 2.54070500  | 1.23506600  | -0.95023200 |
| H | 2.60305100  | 1.20996800  | 0.79666200  |
| C | 1.32832300  | -0.30881100 | -0.06241600 |
| H | 1.35946300  | -0.96860600 | 0.81203400  |
| H | 1.32496100  | -0.96153000 | -0.94345400 |
| C | 0.04279100  | 0.51338400  | -0.03719700 |
| H | 0.01740500  | 1.17338000  | -0.91296900 |
| H | 0.04798100  | 1.16889800  | 0.84220800  |
| C | -1.21821000 | -0.34712700 | -0.01737100 |
| H | -1.19480800 | -1.00488000 | 0.85994500  |
| H | -1.22125800 | -1.00494700 | -0.89500800 |
| C | -2.50566100 | 0.47350700  | 0.00175000  |
| H | -2.52819600 | 1.13191800  | -0.87522700 |
| H | -2.50374500 | 1.13072200  | 0.87987500  |
| C | -3.76623700 | -0.38742000 | 0.01866800  |
| H | -3.74585500 | -1.04455700 | 0.89680100  |
| H | -3.76717400 | -1.04669200 | -0.85809300 |

|   |             |             |             |
|---|-------------|-------------|-------------|
| C | -5.05545100 | 0.43106700  | 0.03322300  |
| H | -5.07429500 | 1.08646700  | -0.84436100 |
| H | -5.05374200 | 1.08862900  | 0.90937400  |
| C | -6.30574800 | -0.44501200 | 0.04909400  |
| H | -6.31835500 | -1.08752500 | 0.93350700  |
| H | -7.21809200 | 0.15470900  | 0.05702600  |
| H | -6.33688700 | -1.09243400 | -0.83127100 |

**TS33: OH + CH<sub>3</sub>(CH<sub>2</sub>)<sub>9</sub>CH<sub>3</sub> → H<sub>2</sub>O + CH<sub>3</sub>CH<sub>2</sub>CH(CH<sub>2</sub>)<sub>7</sub>CH<sub>3</sub>**

|   |             |             |             |
|---|-------------|-------------|-------------|
| C | -6.00118600 | -0.19624800 | 0.36033600  |
| H | -6.00689200 | 0.89138400  | 0.25807300  |
| H | -6.04559800 | -0.43285800 | 1.42652200  |
| H | -6.90393900 | -0.59110400 | -0.10906800 |
| C | -4.74082000 | -0.78178000 | -0.27097600 |
| H | -4.74542300 | -1.87475900 | -0.17847300 |
| H | -4.72691100 | -0.56578300 | -1.34550400 |
| C | -3.46907300 | -0.24377100 | 0.36197400  |
| H | -3.46297300 | -0.41223600 | 1.44556800  |
| H | -3.50396100 | 0.90983000  | 0.28058900  |
| C | -2.17480400 | -0.71573800 | -0.27673600 |
| H | -2.18672500 | -0.47088400 | -1.34708300 |
| H | -2.12724200 | -1.81134500 | -0.21906900 |
| C | -0.92926100 | -0.11472300 | 0.37070600  |
| H | -0.89647700 | -0.40676400 | 1.42723700  |
| H | -1.01026900 | 0.97834200  | 0.35447200  |
| C | 0.36497200  | -0.54410900 | -0.31495200 |
| H | 0.33976100  | -0.22851000 | -1.36536400 |
| H | 0.42780000  | -1.63925000 | -0.32478500 |
| C | 1.61435800  | 0.02626100  | 0.35163800  |
| H | 1.65696900  | -0.31455500 | 1.39323600  |
| H | 1.53781800  | 1.11965500  | 0.38895500  |
| C | 2.90582400  | -0.36521100 | -0.36211900 |
| H | 2.86798800  | -0.00794800 | -1.39852400 |
| H | 2.97427400  | -1.45870300 | -0.41646100 |
| C | 4.15832200  | 0.18509500  | 0.31490300  |
| H | 4.20927500  | -0.18932500 | 1.34469900  |
| H | 4.08146500  | 1.27695600  | 0.38895200  |
| C | 5.44749300  | -0.17938500 | -0.41786900 |
| H | 5.39741700  | 0.20392500  | -1.44287000 |
| H | 5.51895300  | -1.26960500 | -0.49978000 |
| C | 6.69242200  | 0.36742200  | 0.27585900  |
| H | 6.77984000  | -0.03181800 | 1.28977200  |
| H | 7.60310000  | 0.10597300  | -0.26668900 |

|   |             |            |             |
|---|-------------|------------|-------------|
| H | 6.64811600  | 1.45714100 | 0.35169200  |
| O | -3.53355300 | 2.26939800 | -0.32009100 |
| H | -3.36742900 | 1.98017800 | -1.23193700 |

**OH-R34: OH + CH<sub>3</sub>(CH<sub>2</sub>)<sub>9</sub>CH<sub>3</sub> → H<sub>2</sub>O + CH<sub>3</sub>(CH<sub>2</sub>)<sub>2</sub>CH(CH<sub>2</sub>)<sub>6</sub>CH<sub>3</sub>**  
**CH<sub>3</sub>(CH<sub>2</sub>)<sub>2</sub>CH(CH<sub>2</sub>)<sub>6</sub>CH<sub>3</sub>**

|   |             |             |             |
|---|-------------|-------------|-------------|
| C | 6.39318400  | -0.15406200 | 0.25168100  |
| H | 6.61420100  | -0.72488600 | -0.65415700 |
| H | 6.38594700  | -0.85393100 | 1.09146100  |
| H | 7.21085700  | 0.55147900  | 0.41094100  |
| C | 5.05136900  | 0.56221900  | 0.13021000  |
| H | 4.85728000  | 1.14985300  | 1.03300800  |
| H | 5.08434100  | 1.27279600  | -0.70240300 |
| C | 3.88774900  | -0.40554600 | -0.08947400 |
| H | 3.84658800  | -1.12462700 | 0.74037000  |
| H | 4.09878900  | -1.01360000 | -0.98633200 |
| C | 2.56730300  | 0.27203300  | -0.22707800 |
| H | 2.54329900  | 1.28140800  | -0.62956200 |
| C | 1.29335400  | -0.49988000 | -0.16653600 |
| H | 1.31053700  | -1.16816900 | 0.70575100  |
| H | 1.21658900  | -1.17086500 | -1.03954700 |
| C | 0.04609700  | 0.38194900  | -0.11085300 |
| H | 0.03266400  | 1.03932300  | -0.98830300 |
| H | 0.10866400  | 1.03657500  | 0.76591500  |
| C | -1.25180100 | -0.41911300 | -0.05885300 |
| H | -1.23828900 | -1.07622300 | 0.81925400  |
| H | -1.30675500 | -1.07722300 | -0.93474400 |
| C | -2.49820000 | 0.46133100  | -0.01047200 |
| H | -2.51061700 | 1.11929500  | -0.88794100 |
| H | -2.44490600 | 1.11856500  | 0.86602000  |
| C | -3.79711100 | -0.33925900 | 0.03784000  |
| H | -3.78779700 | -0.99426300 | 0.91774100  |
| H | -3.84808800 | -1.00028000 | -0.83619400 |
| C | -5.04587500 | 0.53881500  | 0.07774100  |
| H | -5.05355400 | 1.19204600  | -0.80158500 |
| H | -4.99478000 | 1.19800700  | 0.95121900  |
| C | -6.33496800 | -0.27786600 | 0.12426800  |
| H | -6.35816400 | -0.91612400 | 1.01156100  |
| H | -7.21825400 | 0.36343800  | 0.14891900  |
| H | -6.41515500 | -0.92633000 | -0.75225500 |

**TS34: OH + CH<sub>3</sub>(CH<sub>2</sub>)<sub>9</sub>CH<sub>3</sub> → H<sub>2</sub>O + CH<sub>3</sub>(CH<sub>2</sub>)<sub>2</sub>CH(CH<sub>2</sub>)<sub>6</sub>CH<sub>3</sub>**

|   |             |             |             |
|---|-------------|-------------|-------------|
| C | -6.12414000 | -0.62444400 | -0.23522900 |
|---|-------------|-------------|-------------|

|   |             |             |             |
|---|-------------|-------------|-------------|
| H | -6.17750200 | -1.71078300 | -0.12346900 |
| H | -6.14499000 | -0.39938100 | -1.30489600 |
| H | -7.02281600 | -0.19691500 | 0.21316500  |
| C | -4.85773500 | -0.06989600 | 0.41129900  |
| H | -4.82900700 | 1.01955100  | 0.30974600  |
| H | -4.86638300 | -0.28308200 | 1.48560000  |
| C | -3.58688400 | -0.65344600 | -0.20233700 |
| H | -3.57857100 | -0.45421400 | -1.28166600 |
| H | -3.59417600 | -1.74649900 | -0.09436900 |
| C | -2.31523600 | -0.10480000 | 0.42020900  |
| H | -2.30966500 | -0.24923000 | 1.50715300  |
| H | -2.34513400 | 1.04645900  | 0.31275300  |
| C | -1.02260800 | -0.59757500 | -0.20667600 |
| H | -1.03847100 | -0.39032900 | -1.28473700 |
| H | -0.97500900 | -1.69052300 | -0.11057700 |
| C | 0.22560600  | 0.02520000  | 0.41436600  |
| H | 0.24755500  | -0.20561900 | 1.48615400  |
| H | 0.15821000  | 1.11645800  | 0.33504800  |
| C | 1.51904800  | -0.46030600 | -0.23447000 |
| H | 1.49648600  | -0.22922800 | -1.30664000 |
| H | 1.57782400  | -1.55304300 | -0.15707000 |
| C | 2.76972600  | 0.15718100  | 0.38634200  |
| H | 2.79378700  | -0.07376500 | 1.45828000  |
| H | 2.71086600  | 1.24959500  | 0.30877100  |
| C | 4.06318200  | -0.32702300 | -0.26352500 |
| H | 4.03925700  | -0.09713300 | -1.33595000 |
| H | 4.12231300  | -1.41976600 | -0.18537300 |
| C | 5.31598200  | 0.28975700  | 0.35449700  |
| H | 5.33882000  | 0.05970500  | 1.42528400  |
| H | 5.25589000  | 1.38072200  | 0.27506000  |
| C | 6.60016500  | -0.20469600 | -0.30621000 |
| H | 6.60744900  | 0.03878100  | -1.37202400 |
| H | 7.48552400  | 0.24610400  | 0.14639300  |
| H | 6.69196700  | -1.29025300 | -0.21391100 |
| O | -2.36984200 | 2.39551300  | -0.31283100 |
| H | -2.20812500 | 2.08857100  | -1.21967700 |

**OH-R35: OH + CH<sub>3</sub>(CH<sub>2</sub>)<sub>9</sub>CH<sub>3</sub> → H<sub>2</sub>O + CH<sub>3</sub>(CH<sub>2</sub>)<sub>3</sub>CH(CH<sub>2</sub>)<sub>5</sub>CH<sub>3</sub>**

|   |             |             |             |
|---|-------------|-------------|-------------|
| C | -6.28950400 | -0.65182600 | 0.21006700  |
| H | -6.15913500 | -1.39707300 | 0.99904000  |
| H | -7.23757200 | -0.13984200 | 0.38584200  |
| H | -6.36783000 | -1.18603000 | -0.74043500 |
| C | -5.11732000 | 0.32594500  | 0.18813500  |



|   |             |             |             |
|---|-------------|-------------|-------------|
| H | -5.07165700 | 0.86879100  | 1.13849600  |
| H | -5.27940700 | 1.07969400  | -0.59008200 |
| C | -3.78034000 | -0.36876400 | -0.05692500 |
| H | -3.61234200 | -1.12408000 | 0.71923500  |
| H | -3.82149500 | -0.90883900 | -1.01038400 |
| C | -2.59615400 | 0.59766500  | -0.07884000 |
| H | -2.78156500 | 1.36866100  | -0.84654800 |
| H | -2.55125400 | 1.14605500  | 0.87210400  |
| C | -1.28679500 | -0.06941200 | -0.32973800 |
| H | -1.27740900 | -0.98983800 | -0.90759900 |
| C | -0.00026900 | 0.65682400  | -0.13023000 |
| H | -0.02715600 | 1.19217800  | 0.82884900  |
| H | 0.11274300  | 1.44421300  | -0.89528800 |
| C | 1.22804800  | -0.25226000 | -0.17471400 |
| H | 1.25170100  | -0.77646100 | -1.13739500 |
| H | 1.12938900  | -1.02476200 | 0.59621400  |
| C | 2.53929400  | 0.50324200  | 0.02305800  |
| H | 2.51257800  | 1.03058200  | 0.98441500  |
| H | 2.63319500  | 1.27644500  | -0.74922800 |
| C | 3.76623000  | -0.40408000 | -0.01978900 |
| H | 3.79438900  | -0.93161200 | -0.98109200 |
| H | 3.67284800  | -1.17778700 | 0.75204800  |
| C | 5.07964000  | 0.34923400  | 0.17920200  |
| H | 5.04984600  | 0.87560400  | 1.13936700  |
| H | 5.17170400  | 1.12107400  | -0.59259300 |
| C | 6.29669300  | -0.57137400 | 0.13451700  |
| H | 6.35829900  | -1.08776200 | -0.82701500 |
| H | 7.22642000  | -0.01718700 | 0.27740500  |
| H | 6.23658200  | -1.33318400 | 0.91618800  |

**TS35: OH + CH<sub>3</sub>(CH<sub>2</sub>)<sub>9</sub>CH<sub>3</sub> → H<sub>2</sub>O + CH<sub>3</sub>(CH<sub>2</sub>)<sub>3</sub>CH(CH<sub>2</sub>)<sub>5</sub>CH<sub>3</sub>**

|   |            |             |             |
|---|------------|-------------|-------------|
| C | 6.23791600 | 0.06353500  | 0.25200700  |
| H | 6.29802400 | -0.00798000 | 1.34133000  |
| H | 6.22361900 | 1.12470100  | -0.01018800 |
| H | 7.14864500 | -0.37253600 | -0.16316600 |
| C | 4.98779100 | -0.63965600 | -0.27024600 |
| H | 4.96348700 | -0.58486500 | -1.36392300 |
| H | 5.02842300 | -1.70443500 | -0.01493300 |
| C | 3.70177700 | -0.03517000 | 0.28809500  |
| H | 3.64721800 | 1.02584200  | 0.01794300  |
| H | 3.72826000 | -0.07684900 | 1.38413900  |
| C | 2.44269300 | -0.73749000 | -0.21341200 |
| H | 2.46273700 | -1.79347800 | 0.08872800  |

|   |             |             |             |
|---|-------------|-------------|-------------|
| H | 2.42940800  | -0.72888600 | -1.30938200 |
| C | 1.16343400  | -0.10090200 | 0.30271700  |
| H | 1.17705900  | 0.98547900  | -0.07506100 |
| H | 1.17279600  | -0.02600300 | 1.39659100  |
| C | -0.12643600 | -0.73165500 | -0.19196600 |
| H | -0.17913800 | -1.76510700 | 0.17612200  |
| H | -0.10263400 | -0.79213800 | -1.28596100 |
| C | -1.37339100 | 0.03127700  | 0.24878600  |
| H | -1.32295000 | 1.05020100  | -0.15284100 |
| H | -1.37540400 | 0.12331800  | 1.34226800  |
| C | -2.67321500 | -0.62872300 | -0.20342800 |
| H | -2.72706100 | -1.64517500 | 0.20524500  |
| H | -2.66371600 | -0.73557100 | -1.29483300 |
| C | -3.91701500 | 0.15046000  | 0.21626300  |
| H | -3.86455300 | 1.16518600  | -0.19709600 |
| H | -3.92461500 | 0.26343100  | 1.30749800  |
| C | -5.22016800 | -0.50795900 | -0.23024400 |
| H | -5.27421600 | -1.51924300 | 0.18740000  |
| H | -5.20891900 | -0.62461800 | -1.31935800 |
| C | -6.45306500 | 0.28859100  | 0.18951200  |
| H | -6.43005100 | 1.29405200  | -0.23897300 |
| H | -7.37570000 | -0.19449700 | -0.13811600 |
| H | -6.49675300 | 0.39302400  | 1.27691600  |
| O | 1.16019700  | 2.43327200  | -0.47886300 |
| H | 0.76253300  | 2.76611300  | 0.34205800  |

**OH-R36: OH + CH<sub>3</sub>(CH<sub>2</sub>)<sub>9</sub>CH<sub>3</sub> → H<sub>2</sub>O + CH<sub>3</sub>(CH<sub>2</sub>)<sub>4</sub>CH(CH<sub>2</sub>)<sub>4</sub>CH<sub>3</sub>  
CH<sub>3</sub>(CH<sub>2</sub>)<sub>4</sub>CH(CH<sub>2</sub>)<sub>4</sub>CH<sub>3</sub>**

|   |            |             |             |
|---|------------|-------------|-------------|
| C | 6.37247500 | -0.22168500 | 0.08784100  |
| H | 6.46410500 | -0.84707300 | -0.80422200 |
| H | 6.41561600 | -0.87985400 | 0.95966700  |
| H | 7.23991800 | 0.44028900  | 0.12369600  |
| C | 5.06367900 | 0.56412600  | 0.06609500  |
| H | 5.00222800 | 1.20413700  | 0.95301100  |
| H | 5.05004600 | 1.23472200  | -0.79995900 |
| C | 3.83687500 | -0.34356400 | 0.01535900  |
| H | 3.84566900 | -1.01208500 | 0.88505200  |
| H | 3.90218100 | -0.98955800 | -0.86904900 |
| C | 2.51942400 | 0.42566600  | -0.01895200 |
| H | 2.51195200 | 1.09366100  | -0.88838800 |
| H | 2.44544900 | 1.06761900  | 0.86631700  |
| C | 1.29575700 | -0.48748400 | -0.08063300 |
| H | 1.29471800 | -1.16014200 | 0.78906300  |

|   |             |             |             |
|---|-------------|-------------|-------------|
| H | 1.39152800  | -1.15377400 | -0.95530100 |
| C | 0.00000000  | 0.24682600  | -0.14503300 |
| H | 0.00000000  | 1.27846100  | -0.48609600 |
| C | -1.29575700 | -0.48748400 | -0.08063300 |
| H | -1.29471800 | -1.16014300 | 0.78906300  |
| H | -1.39152800 | -1.15377400 | -0.95530100 |
| C | -2.51942400 | 0.42566600  | -0.01895100 |
| H | -2.51195200 | 1.09366100  | -0.88838700 |
| H | -2.44544900 | 1.06761800  | 0.86631700  |
| C | -3.83687500 | -0.34356500 | 0.01535900  |
| H | -3.84566900 | -1.01208500 | 0.88505200  |
| H | -3.90218100 | -0.98955900 | -0.86904800 |
| C | -5.06367900 | 0.56412500  | 0.06609500  |
| H | -5.05004500 | 1.23472200  | -0.79995900 |
| H | -5.00222800 | 1.20413700  | 0.95301100  |
| C | -6.37247500 | -0.22168500 | 0.08784000  |
| H | -6.41561700 | -0.87985400 | 0.95966700  |
| H | -7.23991800 | 0.44029000  | 0.12369500  |
| H | -6.46410500 | -0.84707300 | -0.80422300 |

**TS36: OH + CH<sub>3</sub>(CH<sub>2</sub>)<sub>9</sub>CH<sub>3</sub> → H<sub>2</sub>O + CH<sub>3</sub>(CH<sub>2</sub>)<sub>4</sub>CH(CH<sub>2</sub>)<sub>4</sub>CH<sub>3</sub>**

|   |             |             |             |
|---|-------------|-------------|-------------|
| C | -6.36498300 | -0.40418600 | -0.27480200 |
| H | -6.43683600 | -1.49093900 | -0.17890700 |
| H | -6.37885000 | -0.16414400 | -1.34133400 |
| H | -7.25753500 | 0.03186000  | 0.17803400  |
| C | -5.08896100 | 0.11608100  | 0.38182800  |
| H | -5.04851200 | 1.20752300  | 0.29939700  |
| H | -5.10502800 | -0.11162600 | 1.45320100  |
| C | -3.82649100 | -0.47918600 | -0.23752700 |
| H | -3.81051000 | -0.25208100 | -1.31076300 |
| H | -3.86486900 | -1.57267300 | -0.15576200 |
| C | -2.54214500 | 0.03457500  | 0.40725200  |
| H | -2.55783600 | -0.19298400 | 1.47993300  |
| H | -2.49617000 | 1.12632800  | 0.32227400  |
| C | -1.28261100 | -0.56425800 | -0.21415200 |
| H | -1.27085600 | -0.35446500 | -1.29150300 |
| H | -1.30837800 | -1.65799100 | -0.11811200 |
| C | -0.00056000 | -0.04552700 | 0.41315200  |
| H | -0.00035900 | -0.19492400 | 1.49941800  |
| H | -0.00242800 | 1.10668900  | 0.31107400  |
| C | 1.28201600  | -0.56345400 | -0.21393800 |
| H | 1.27097500  | -0.35322000 | -1.29134300 |
| H | 1.30747600  | -1.65728500 | -0.11936100 |

|   |             |             |             |
|---|-------------|-------------|-------------|
| C | 2.54177500  | 0.03370000  | 0.40875700  |
| H | 2.55737000  | -0.19645900 | 1.48085100  |
| H | 2.49647400  | 1.12581300  | 0.32722100  |
| C | 3.82595200  | -0.47883100 | -0.23736800 |
| H | 3.80972600  | -0.24992300 | -1.31024100 |
| H | 3.86420100  | -1.57245100 | -0.15760300 |
| C | 5.08870200  | 0.11517700  | 0.38261300  |
| H | 5.10496900  | -0.11420100 | 1.45361800  |
| H | 5.04856000  | 1.20676900  | 0.30193400  |
| C | 6.36439900  | -0.40442200 | -0.27516800 |
| H | 6.37795500  | -0.16298200 | -1.34139200 |
| H | 7.25716500  | 0.03088300  | 0.17793800  |
| H | 6.43610800  | -1.49130600 | -0.18073300 |
| O | -0.00248300 | 2.45669400  | -0.31270100 |
| H | 0.04449200  | 2.14221200  | -1.23012900 |

### 3.1.12 C12 (*n*-C<sub>12</sub>H<sub>26</sub>)

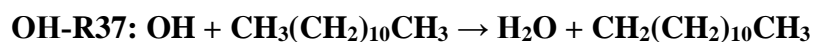

*n*-C<sub>12</sub>H<sub>26</sub>

|   |             |             |             |
|---|-------------|-------------|-------------|
| C | 7.00721800  | 0.31339100  | -0.00030200 |
| H | 7.04990500  | 0.95751700  | 0.88201500  |
| H | 7.04974800  | 0.95726500  | -0.88281200 |
| H | 7.89975600  | -0.31548600 | -0.00029200 |
| C | 5.72875900  | -0.52125800 | -0.00007000 |
| H | 5.71594800  | -1.17776700 | -0.87691700 |
| H | 5.71611100  | -1.17752700 | 0.87696000  |
| C | 4.46730700  | 0.33952000  | -0.00007000 |
| H | 4.47915800  | 0.99762800  | -0.87764200 |
| H | 4.47929200  | 0.99782700  | 0.87735000  |
| C | 3.17839100  | -0.47856900 | 0.00011700  |
| H | 3.16696700  | -1.13630000 | 0.87780400  |
| H | 3.16683000  | -1.13647700 | -0.87743600 |
| C | 1.91916800  | 0.38496500  | 0.00012700  |
| H | 1.93099400  | 1.04278600  | -0.87746200 |
| H | 1.93106300  | 1.04287000  | 0.87765200  |
| C | 0.62937400  | -0.43208100 | 0.00021100  |
| H | 0.61742300  | -1.08988200 | 0.87782200  |
| H | 0.61736100  | -1.08994800 | -0.87735000 |
| C | -0.62937400 | 0.43208100  | 0.00021900  |
| H | -0.61737500 | 1.08994400  | -0.87734400 |
| H | -0.61740900 | 1.08988600  | 0.87782700  |
| C | -1.91916800 | -0.38496500 | 0.00016000  |
| H | -1.93105600 | -1.04285800 | 0.87769400  |

|   |             |             |             |
|---|-------------|-------------|-------------|
| H | -1.93100200 | -1.04279800 | -0.87742000 |
| C | -3.17839100 | 0.47856900  | 0.00014700  |
| H | -3.16682800 | 1.13647400  | -0.87740800 |
| H | -3.16696900 | 1.13630200  | 0.87783200  |
| C | -4.46730700 | -0.33952000 | -0.00004200 |
| H | -4.47930500 | -0.99781100 | 0.87739000  |
| H | -4.47914500 | -0.99764400 | -0.87760200 |
| C | -5.72875900 | 0.52125800  | -0.00007800 |
| H | -5.71592800 | 1.17775700  | -0.87693200 |
| H | -5.71613000 | 1.17753600  | 0.87694500  |
| C | -7.00721800 | -0.31339100 | -0.00033200 |
| H | -7.04992900 | -0.95750300 | 0.88199500  |
| H | -7.89975600 | 0.31548600  | -0.00035600 |
| H | -7.04972400 | -0.95728000 | -0.88283200 |

**CH<sub>2</sub>(CH<sub>2</sub>)<sub>10</sub>CH<sub>3</sub>**

|   |             |             |             |
|---|-------------|-------------|-------------|
| C | -7.05825800 | 0.29716400  | -0.01673200 |
| H | -7.09366600 | 1.27004500  | 0.45824200  |
| H | -7.99018000 | -0.13227700 | -0.35902900 |
| C | -5.80217300 | -0.50178100 | 0.00518500  |
| H | -5.77245400 | -1.13719800 | 0.90573600  |
| H | -5.78749400 | -1.19820200 | -0.84121100 |
| C | -4.53937400 | 0.36263500  | -0.01897400 |
| H | -4.55892800 | 1.04873000  | 0.83612100  |
| H | -4.55056300 | 0.98804800  | -0.91861400 |
| C | -3.25358000 | -0.45866200 | 0.01721400  |
| H | -3.23970300 | -1.14715500 | -0.83650200 |
| H | -3.24712300 | -1.08482600 | 0.91777900  |
| C | -1.99262900 | 0.40178700  | -0.00927400 |
| H | -2.00287600 | 1.08626200  | 0.84762200  |
| H | -2.00291000 | 1.03217000  | -0.90668400 |
| C | -0.70537200 | -0.41887600 | 0.01562800  |
| H | -0.69536000 | -1.10223200 | -0.84221500 |
| H | -0.69541300 | -1.05064600 | 0.91217000  |
| C | 0.55610400  | 0.44086500  | -0.01012700 |
| H | 0.54779500  | 1.12240300  | 0.84916900  |
| H | 0.54483300  | 1.07450900  | -0.90532600 |
| C | 1.84292300  | -0.38060200 | 0.01010000  |
| H | 1.85124500  | -1.06160800 | -0.84962700 |
| H | 1.85361400  | -1.01495600 | 0.90481500  |
| C | 3.10531000  | 0.47790600  | -0.01465300 |
| H | 3.09705300  | 1.15921600  | 0.84485800  |
| H | 3.09541000  | 1.11184300  | -0.90969000 |

|   |            |             |             |
|---|------------|-------------|-------------|
| C | 4.39111200 | -0.34477700 | 0.00666400  |
| H | 4.40036500 | -1.02611000 | -0.85300600 |
| H | 4.40089000 | -0.97950100 | 0.90131900  |
| C | 5.65573700 | 0.51100500  | -0.01649600 |
| H | 5.64436200 | 1.19195100  | 0.84148700  |
| H | 5.64631700 | 1.14243700  | -0.91161800 |
| C | 6.93115200 | -0.32785500 | 0.00914200  |
| H | 6.97366200 | -0.99606000 | -0.85503200 |
| H | 7.82587700 | 0.29771700  | -0.00589500 |
| H | 6.96954200 | -0.94741700 | 0.90908400  |

**TS37: OH + CH<sub>3</sub>(CH<sub>2</sub>)<sub>10</sub>CH<sub>3</sub> → H<sub>2</sub>O + CH<sub>2</sub>(CH<sub>2</sub>)<sub>10</sub>CH<sub>3</sub>**

|   |             |             |             |
|---|-------------|-------------|-------------|
| C | 6.21187800  | 0.64017300  | -0.02939200 |
| H | 6.30839600  | 1.19586400  | 0.90579200  |
| H | 6.28789500  | 1.32309100  | -0.87809500 |
| H | 7.14972100  | -0.04730600 | -0.11515800 |
| C | 4.97487600  | -0.23549000 | -0.07106700 |
| H | 4.97928400  | -0.83542100 | -0.98628500 |
| H | 4.99556000  | -0.94074700 | 0.76563800  |
| C | 3.68517600  | 0.58796300  | -0.01120300 |
| H | 3.66410800  | 1.28934100  | -0.85367200 |
| H | 3.68488700  | 1.19818500  | 0.89986400  |
| C | 2.42820500  | -0.27876100 | -0.04165800 |
| H | 2.44760700  | -0.97455800 | 0.80566200  |
| H | 2.43576700  | -0.89619400 | -0.94780600 |
| C | 1.13876500  | 0.53766600  | 0.00329400  |
| H | 1.11869800  | 1.22980200  | -0.84723100 |
| H | 1.13423200  | 1.15978500  | 0.90657200  |
| C | -0.11945700 | -0.32697800 | -0.02043500 |
| H | -0.10210100 | -1.01564900 | 0.83296900  |
| H | -0.11217600 | -0.95297500 | -0.92096700 |
| C | -1.40926600 | 0.48922500  | 0.01598200  |
| H | -1.42673300 | 1.17674900  | -0.83840900 |
| H | -1.41619800 | 1.11654000  | 0.91569000  |
| C | -2.66766800 | -0.37505800 | -0.00662700 |
| H | -2.65196200 | -1.06060400 | 0.84936700  |
| H | -2.65887900 | -1.00454500 | -0.90476500 |
| C | -3.95787100 | 0.44083000  | 0.02434400  |
| H | -3.97322800 | 1.12641600  | -0.83168000 |
| H | -3.96736200 | 1.07025500  | 0.92257800  |
| C | -5.21589500 | -0.42364900 | 0.00028800  |
| H | -5.20264300 | -1.10825800 | 0.85729100  |
| H | -5.20571500 | -1.05484800 | -0.89684600 |

|   |             |             |             |
|---|-------------|-------------|-------------|
| C | -6.50761600 | 0.39052400  | 0.02715100  |
| H | -6.51898400 | 1.07389000  | -0.82892500 |
| H | -6.51726500 | 1.01951700  | 0.92400800  |
| C | -7.75545900 | -0.48874000 | 0.00046400  |
| H | -7.77632600 | -1.15955400 | 0.86337900  |
| H | -8.66951900 | 0.10816300  | 0.01728000  |
| H | -7.77490800 | -1.10739700 | -0.90069300 |
| O | 8.28402400  | -0.89847600 | 0.01598400  |
| H | 8.66165200  | -0.48795100 | 0.80972300  |

**OH-R38: OH + CH<sub>3</sub>(CH<sub>2</sub>)<sub>10</sub>CH<sub>3</sub> → H<sub>2</sub>O + CH<sub>3</sub>CH(CH<sub>2</sub>)<sub>9</sub>CH<sub>3</sub>**

**CH<sub>3</sub>CH(CH<sub>2</sub>)<sub>9</sub>CH<sub>3</sub>**

|   |             |             |             |
|---|-------------|-------------|-------------|
| C | 7.09477600  | -0.17337400 | 0.14998800  |
| H | 7.38303500  | -0.76405000 | -0.73262600 |
| H | 7.08576300  | -0.86865300 | 0.99652000  |
| H | 7.88325900  | 0.56116200  | 0.32041100  |
| C | 5.76300800  | 0.46948800  | -0.02968700 |
| H | 5.71163100  | 1.49211400  | -0.38826300 |
| C | 4.52324900  | -0.35777600 | -0.06325800 |
| H | 4.53668600  | -1.06969900 | 0.77411700  |
| H | 4.51225200  | -0.98501800 | -0.97143900 |
| C | 3.23556600  | 0.46409800  | -0.01555800 |
| H | 3.22455600  | 1.16260400  | -0.86065700 |
| H | 3.23527700  | 1.07680000  | 0.89306900  |
| C | 1.97520900  | -0.39573000 | -0.05256700 |
| H | 1.98815400  | -1.09417600 | 0.79305400  |
| H | 1.98157400  | -1.01152100 | -0.96026600 |
| C | 0.68837200  | 0.42464700  | -0.00842600 |
| H | 0.67311600  | 1.12026900  | -0.85626400 |
| H | 0.68406500  | 1.04344500  | 0.89709500  |
| C | -0.57316500 | -0.43486300 | -0.03827900 |
| H | -0.55811000 | -1.12944600 | 0.81043800  |
| H | -0.56837900 | -1.05488900 | -0.94304000 |
| C | -1.86020700 | 0.38532000  | 0.00462100  |
| H | -1.87636700 | 1.07879000  | -0.84497100 |
| H | -1.86388600 | 1.00659200  | 0.90851400  |
| C | -3.12193800 | -0.47410500 | -0.02177700 |
| H | -3.10470200 | -1.16874000 | 0.82688700  |
| H | -3.11958900 | -1.09413500 | -0.92656300 |
| C | -4.40862500 | 0.34607600  | 0.02475200  |
| H | -4.42708800 | 1.04118500  | -0.82367100 |
| H | -4.41114800 | 0.96633400  | 0.92954200  |
| C | -5.67191900 | -0.51163200 | -0.00034600 |

|   |             |             |             |
|---|-------------|-------------|-------------|
| H | -5.65032400 | -1.20739800 | 0.84547700  |
| H | -5.67034700 | -1.12749100 | -0.90629900 |
| C | -6.94868700 | 0.32371900  | 0.05327000  |
| H | -7.00170400 | 1.00733000  | -0.79816900 |
| H | -7.84220100 | -0.30355400 | 0.03616600  |
| H | -6.97935400 | 0.92693700  | 0.96453600  |

**TS38: OH + CH<sub>3</sub>(CH<sub>2</sub>)<sub>10</sub>CH<sub>3</sub> → H<sub>2</sub>O + CH<sub>3</sub>CH(CH<sub>2</sub>)<sub>9</sub>CH<sub>3</sub>**

|   |             |             |             |
|---|-------------|-------------|-------------|
| C | 6.52314300  | -0.85655700 | -0.08608600 |
| H | 6.55586300  | -0.90638100 | -1.17675900 |
| H | 6.55961300  | -1.88110900 | 0.29772300  |
| H | 7.41740900  | -0.33453800 | 0.25753200  |
| C | 5.25690200  | -0.16161700 | 0.38263500  |
| H | 5.24619600  | -0.03966700 | 1.47082800  |
| H | 5.29015300  | 0.90897700  | -0.04071500 |
| C | 3.96619000  | -0.79677700 | -0.10520900 |
| H | 3.90848500  | -1.82166500 | 0.28609600  |
| H | 3.99764800  | -0.88346900 | -1.19739900 |
| C | 2.71804800  | -0.02218300 | 0.30988700  |
| H | 2.77299100  | 0.98793500  | -0.11269400 |
| H | 2.70768300  | 0.09180500  | 1.40130900  |
| C | 1.42027500  | -0.68861800 | -0.13897400 |
| H | 1.36464800  | -1.69941900 | 0.28319700  |
| H | 1.43473100  | -0.81019400 | -1.22873000 |
| C | 0.17452000  | 0.09619100  | 0.26487600  |
| H | 0.23109400  | 1.10614900  | -0.15914300 |
| H | 0.16149500  | 0.22040900  | 1.35468000  |
| C | -1.12549000 | -0.56689200 | -0.18274300 |
| H | -1.18460300 | -1.57571600 | 0.24379900  |
| H | -1.11072000 | -0.69432600 | -1.27198800 |
| C | -2.36989600 | 0.22290600  | 0.21575700  |
| H | -2.30943300 | 1.23177500  | -0.21044400 |
| H | -2.38501900 | 0.35034500  | 1.30509100  |
| C | -3.67109000 | -0.43715300 | -0.23306500 |
| H | -3.73344000 | -1.44535500 | 0.19455900  |
| H | -3.65518300 | -0.56610000 | -1.32217800 |
| C | -4.91413700 | 0.35585900  | 0.16263300  |
| H | -4.85102600 | 1.36493000  | -0.26316800 |
| H | -4.93193100 | 0.48368800  | 1.25203100  |
| C | -6.21714100 | -0.29987000 | -0.28826600 |
| H | -6.27945300 | -1.30725400 | 0.13765400  |
| H | -6.19824100 | -0.42625500 | -1.37623900 |
| C | -7.44945200 | 0.50610700  | 0.11508600  |



|   |             |            |             |
|---|-------------|------------|-------------|
| H | -7.41703800 | 1.50862600 | -0.31975600 |
| H | -8.37189400 | 0.02591800 | -0.21741500 |
| H | -7.50199300 | 0.61815000 | 1.20133600  |
| O | 5.20646700  | 2.34029200 | -0.45418000 |
| H | 4.75899400  | 2.66204300 | 0.34504800  |

**OH-R39: OH + CH<sub>3</sub>(CH<sub>2</sub>)<sub>10</sub>CH<sub>3</sub> → H<sub>2</sub>O + CH<sub>3</sub>CH<sub>2</sub>CH(CH<sub>2</sub>)<sub>8</sub>CH<sub>3</sub>  
CH<sub>3</sub>CH<sub>2</sub>CH(CH<sub>2</sub>)<sub>8</sub>CH<sub>3</sub>**

|   |             |             |             |
|---|-------------|-------------|-------------|
| C | -6.98510900 | 0.51003100  | 0.14955500  |
| H | -7.06815000 | 1.06848600  | -0.78609500 |
| H | -6.84893900 | 1.23160500  | 0.95829100  |
| H | -7.92913900 | -0.01218400 | 0.31453800  |
| C | -5.80879500 | -0.46275100 | 0.09226600  |
| H | -5.76306800 | -1.05035400 | 1.01891000  |
| H | -5.98560400 | -1.20250000 | -0.70550300 |
| C | -4.49815200 | 0.21342300  | -0.12804800 |
| H | -4.49211900 | 1.20986900  | -0.56203400 |
| C | -3.22202500 | -0.55602100 | -0.09088000 |
| H | -3.16242800 | -1.22893300 | -0.96373400 |
| H | -3.22035800 | -1.22166600 | 0.78346500  |
| C | -1.97465800 | 0.32730500  | -0.06409900 |
| H | -2.01561800 | 0.97934500  | 0.81576400  |
| H | -1.98365900 | 0.98706900  | -0.93981800 |
| C | -0.67544100 | -0.47326600 | -0.04730000 |
| H | -0.64064700 | -1.12591900 | -0.92826700 |
| H | -0.66872200 | -1.13576200 | 0.82685000  |
| C | 0.57162300  | 0.40716000  | -0.02224300 |
| H | 0.53888000  | 1.05812500  | 0.85985100  |
| H | 0.56381000  | 1.07118400  | -0.89516600 |
| C | 1.87119900  | -0.39415200 | -0.01000400 |
| H | 1.90219700  | -1.04625200 | -0.89142700 |
| H | 1.87955200  | -1.05741500 | 0.86349800  |
| C | 3.11992400  | 0.48413800  | 0.01162100  |
| H | 3.09102700  | 1.13480700  | 0.89416100  |
| H | 3.11070700  | 1.14867100  | -0.86093800 |
| C | 4.41807200  | -0.31918900 | 0.01962100  |
| H | 4.44615000  | -0.97120100 | -0.86215500 |
| H | 4.42858700  | -0.98326600 | 0.89269200  |
| C | 5.66964200  | 0.55563400  | 0.03811300  |
| H | 5.64194800  | 1.20484000  | 0.92005800  |
| H | 5.65739100  | 1.21880300  | -0.83369700 |
| C | 6.95728000  | -0.26476100 | 0.04288700  |
| H | 7.01424300  | -0.90180700 | -0.84377800 |

|   |            |             |            |
|---|------------|-------------|------------|
| H | 7.84277800 | 0.37385600  | 0.05468700 |
| H | 6.99983100 | -0.91470600 | 0.92092600 |

**TS39: OH + CH<sub>3</sub>(CH<sub>2</sub>)<sub>10</sub>CH<sub>3</sub> → H<sub>2</sub>O + CH<sub>3</sub>CH<sub>2</sub>CH(CH<sub>2</sub>)<sub>8</sub>CH<sub>3</sub>**

|   |             |             |             |
|---|-------------|-------------|-------------|
| C | -6.61543000 | -0.20418000 | 0.25786800  |
| H | -6.61911500 | 0.84497900  | -0.04735600 |
| H | -6.67986300 | -0.23761700 | 1.34877100  |
| H | -7.50993900 | -0.68171300 | -0.14586700 |
| C | -5.34419100 | -0.89218700 | -0.23200700 |
| H | -5.33860700 | -1.94352600 | 0.08184700  |
| H | -5.31818900 | -0.89431000 | -1.32638800 |
| C | -4.08489200 | -0.22012500 | 0.28954700  |
| H | -4.10521100 | -0.14153300 | 1.38317600  |
| H | -4.12574700 | 0.86429700  | -0.09207500 |
| C | -2.77489800 | -0.81760200 | -0.19268300 |
| H | -2.78552900 | -0.87629700 | -1.28697300 |
| H | -2.70054900 | -1.85021800 | 0.17412700  |
| C | -1.55218400 | -0.02505800 | 0.26354900  |
| H | -1.56471200 | 0.06364200  | 1.35723000  |
| H | -1.62353800 | 0.99362100  | -0.13566800 |
| C | -0.23141400 | -0.65160600 | -0.17533500 |
| H | -0.22370100 | -0.75123200 | -1.26741000 |
| H | -0.15959300 | -1.66926900 | 0.22752500  |
| C | 0.98821600  | 0.15336900  | 0.26661200  |
| H | 0.97734700  | 0.25921200  | 1.35836300  |
| H | 0.91711800  | 1.16890400  | -0.14162500 |
| C | 2.31131700  | -0.47282000 | -0.16638100 |
| H | 2.31703300  | -0.58937200 | -1.25692500 |
| H | 2.38862200  | -1.48419800 | 0.25108300  |
| C | 3.52933600  | 0.34338800  | 0.25954300  |
| H | 3.52254900  | 0.46355000  | 1.34980800  |
| H | 3.45218800  | 1.35347400  | -0.16112100 |
| C | 4.85330900  | -0.28233600 | -0.17076200 |
| H | 4.85788000  | -0.40909600 | -1.26036500 |
| H | 4.93536400  | -1.28994600 | 0.25528600  |
| C | 6.07137000  | 0.53979100  | 0.24464400  |
| H | 6.06585500  | 0.66615700  | 1.33279100  |
| H | 5.98788500  | 1.54514600  | -0.18249800 |
| C | 7.38714800  | -0.09826000 | -0.19301800 |
| H | 7.42079200  | -0.21297800 | -1.27970700 |
| H | 8.24686400  | 0.50430100  | 0.10692000  |
| H | 7.50366400  | -1.09174900 | 0.24827000  |
| O | -4.16005700 | 2.31287200  | -0.49186100 |

|                                                                                                                                                                                         |             |             |             |
|-----------------------------------------------------------------------------------------------------------------------------------------------------------------------------------------|-------------|-------------|-------------|
| H                                                                                                                                                                                       | -3.78453300 | 2.65854900  | 0.33421400  |
| <b>OH-R40: OH + CH<sub>3</sub>(CH<sub>2</sub>)<sub>10</sub>CH<sub>3</sub> → H<sub>2</sub>O + CH<sub>3</sub>(CH<sub>2</sub>)<sub>2</sub>CH(CH<sub>2</sub>)<sub>7</sub>CH<sub>3</sub></b> |             |             |             |
| <b>CH<sub>3</sub>(CH<sub>2</sub>)<sub>2</sub>CH(CH<sub>2</sub>)<sub>7</sub>CH<sub>3</sub></b>                                                                                           |             |             |             |
| C                                                                                                                                                                                       | -7.03426800 | 0.02685300  | 0.27352600  |
| H                                                                                                                                                                                       | -7.27436500 | 0.66437300  | -0.58158500 |
| H                                                                                                                                                                                       | -7.04104400 | 0.65523700  | 1.16814500  |
| H                                                                                                                                                                                       | -7.83280300 | -0.71043500 | 0.37652700  |
| C                                                                                                                                                                                       | -5.67497500 | -0.64155600 | 0.08989900  |
| H                                                                                                                                                                                       | -5.46319600 | -1.29920300 | 0.93885800  |
| H                                                                                                                                                                                       | -5.69183600 | -1.27905000 | -0.80042400 |
| C                                                                                                                                                                                       | -4.53689900 | 0.37073100  | -0.04698300 |
| H                                                                                                                                                                                       | -4.51500600 | 1.01986000  | 0.83948600  |
| H                                                                                                                                                                                       | -4.76279100 | 1.04542200  | -0.89095800 |
| C                                                                                                                                                                                       | -3.19980300 | -0.25962400 | -0.23699300 |
| H                                                                                                                                                                                       | -3.15240800 | -1.24496600 | -0.69367300 |
| C                                                                                                                                                                                       | -1.94594800 | 0.54182000  | -0.14839800 |
| H                                                                                                                                                                                       | -1.97888100 | 1.17914300  | 0.74618000  |
| H                                                                                                                                                                                       | -1.88479700 | 1.24346200  | -0.99820400 |
| C                                                                                                                                                                                       | -0.67837800 | -0.31233700 | -0.12260300 |
| H                                                                                                                                                                                       | -0.65572300 | -0.94562300 | -1.01747400 |
| H                                                                                                                                                                                       | -0.72208000 | -0.99168700 | 0.73625400  |
| C                                                                                                                                                                                       | 0.60266000  | 0.51429100  | -0.05598300 |
| H                                                                                                                                                                                       | 0.57989400  | 1.15024100  | 0.83740400  |
| H                                                                                                                                                                                       | 0.64115600  | 1.19348900  | -0.91646800 |
| C                                                                                                                                                                                       | 1.86575100  | -0.34315200 | -0.03313500 |
| H                                                                                                                                                                                       | 1.88343000  | -0.98397900 | -0.92312200 |
| H                                                                                                                                                                                       | 1.83035100  | -1.01798000 | 0.83072100  |
| C                                                                                                                                                                                       | 3.15128500  | 0.47873200  | 0.02121900  |
| H                                                                                                                                                                                       | 3.13632100  | 1.11840500  | 0.91208600  |
| H                                                                                                                                                                                       | 3.18548500  | 1.15445000  | -0.84211400 |
| C                                                                                                                                                                                       | 4.41236700  | -0.38150000 | 0.03848900  |
| H                                                                                                                                                                                       | 4.42382400  | -1.02565800 | -0.84938500 |
| H                                                                                                                                                                                       | 4.38203400  | -1.05376100 | 0.90481500  |
| C                                                                                                                                                                                       | 5.70095700  | 0.43682500  | 0.08197200  |
| H                                                                                                                                                                                       | 5.68970000  | 1.07892900  | 0.96946400  |
| H                                                                                                                                                                                       | 5.72925300  | 1.10757300  | -0.78367100 |
| C                                                                                                                                                                                       | 6.95120900  | -0.43937300 | 0.09571800  |
| H                                                                                                                                                                                       | 6.99011100  | -1.07321600 | -0.79419700 |
| H                                                                                                                                                                                       | 7.86341100  | 0.16010400  | 0.12075600  |
| H                                                                                                                                                                                       | 6.95621100  | -1.09538900 | 0.97021300  |

**TS40: OH + CH<sub>3</sub>(CH<sub>2</sub>)<sub>10</sub>CH<sub>3</sub> → H<sub>2</sub>O + CH<sub>3</sub>(CH<sub>2</sub>)<sub>2</sub>CH(CH<sub>2</sub>)<sub>7</sub>CH<sub>3</sub>**

|   |             |             |             |
|---|-------------|-------------|-------------|
| C | -6.74243700 | -0.58886400 | -0.17659100 |
|---|-------------|-------------|-------------|

|   |             |             |             |
|---|-------------|-------------|-------------|
| H | -6.83687900 | -1.61862900 | 0.17838800  |
| H | -6.75361100 | -0.61147400 | -1.26933600 |
| H | -7.62473100 | -0.03794000 | 0.15491800  |
| C | -5.45636500 | 0.05152500  | 0.33831000  |
| H | -5.38969600 | 1.08884600  | -0.00481400 |
| H | -5.47207400 | 0.08460200  | 1.43332500  |
| C | -4.20710100 | -0.69648300 | -0.12211800 |
| H | -4.19356900 | -0.74571000 | -1.21713300 |
| H | -4.24629100 | -1.73484100 | 0.23456600  |
| C | -2.91791200 | -0.05626900 | 0.36321500  |
| H | -2.91760500 | 0.05187200  | 1.45435500  |
| H | -2.92314100 | 1.01865700  | -0.04716800 |
| C | -1.63790500 | -0.71355900 | -0.12268300 |
| H | -1.66627300 | -0.79445400 | -1.21527700 |
| H | -1.59731200 | -1.74051600 | 0.26455500  |
| C | -0.37973400 | 0.04135300  | 0.29944300  |
| H | -0.36558300 | 0.14130400  | 1.39213400  |
| H | -0.42523800 | 1.05776800  | -0.10912500 |
| C | 0.90931200  | -0.63327900 | -0.16187700 |
| H | 0.89082700  | -0.73896200 | -1.25327100 |
| H | 0.95466700  | -1.65063300 | 0.24551300  |
| C | 2.16469300  | 0.13200200  | 0.24942300  |
| H | 2.18602200  | 0.23480200  | 1.34131500  |
| H | 2.11443200  | 1.15048600  | -0.15446200 |
| C | 3.45588700  | -0.53298000 | -0.22051700 |
| H | 3.43095300  | -0.64099500 | -1.31172900 |
| H | 3.51102200  | -1.54956900 | 0.18769700  |
| C | 4.70936900  | 0.24055500  | 0.18063800  |
| H | 4.73753000  | 0.34644600  | 1.27221500  |
| H | 4.65193900  | 1.25833700  | -0.22463000 |
| C | 6.00251900  | -0.41745600 | -0.29467600 |
| H | 5.97289800  | -0.52182400 | -1.38476200 |
| H | 6.05958600  | -1.43359500 | 0.11059200  |
| C | 7.24524200  | 0.36976100  | 0.11362000  |
| H | 7.30916500  | 0.45836300  | 1.20145900  |
| H | 8.16048500  | -0.11064700 | -0.23787000 |
| H | 7.21704700  | 1.38142100  | -0.29974500 |
| O | -2.89452500 | 2.45959800  | -0.47089500 |
| H | -2.50177600 | 2.80226500  | 0.34833800  |

**OH-R41:**  $\text{OH} + \text{CH}_3(\text{CH}_2)_{10}\text{CH}_3 \rightarrow \text{H}_2\text{O} + \text{CH}_3(\text{CH}_2)_3\text{CH}(\text{CH}_2)_6\text{CH}_3$   
 $\text{CH}_3(\text{CH}_2)_3\text{CH}(\text{CH}_2)_6\text{CH}_3$

|   |             |            |            |
|---|-------------|------------|------------|
| C | -6.92713800 | 0.61602700 | 0.29170500 |
|---|-------------|------------|------------|

|   |             |             |             |
|---|-------------|-------------|-------------|
| H | -7.04418900 | 1.11315700  | -0.67489900 |
| H | -6.78170900 | 1.39188100  | 1.04802000  |
| H | -7.86160300 | 0.09859000  | 0.51752800  |
| C | -5.74280400 | -0.34664000 | 0.26677200  |
| H | -5.65923100 | -0.85481700 | 1.23375800  |
| H | -5.91820500 | -1.12958500 | -0.47919400 |
| C | -4.42355600 | 0.35529900  | -0.04504700 |
| H | -4.24136800 | 1.13927600  | 0.69897400  |
| H | -4.50190500 | 0.86090900  | -1.01507500 |
| C | -3.22980000 | -0.59886600 | -0.07020700 |
| H | -3.43011000 | -1.39842100 | -0.80451700 |
| H | -3.14997500 | -1.11300700 | 0.89757800  |
| C | -1.93473800 | 0.06969700  | -0.38397600 |
| H | -1.95147400 | 0.96943200  | -0.99386200 |
| C | -0.63704600 | -0.64316900 | -0.20986400 |
| H | -0.51787900 | -1.41214100 | -0.99260100 |
| H | -0.64936900 | -1.19840800 | 0.73781900  |
| C | 0.57907900  | 0.28313700  | -0.24372500 |
| H | 0.47465400  | 1.03812500  | 0.54372500  |
| H | 0.59003600  | 0.82793400  | -1.19524000 |
| C | 1.90014100  | -0.46030700 | -0.06847700 |
| H | 2.00250000  | -1.21291700 | -0.85989200 |
| H | 1.88192000  | -1.01224200 | 0.87926100  |
| C | 3.11606200  | 0.46274000  | -0.08963400 |
| H | 3.00967400  | 1.21902700  | 0.69758100  |
| H | 3.14003600  | 1.01002900  | -1.03985900 |
| C | 4.43618400  | -0.27999100 | 0.09918300  |
| H | 4.54449100  | -1.03634600 | -0.68799300 |
| H | 4.41119300  | -0.82816500 | 1.04907500  |
| C | 5.65408200  | 0.64109400  | 0.08233800  |
| H | 5.54245900  | 1.39778700  | 0.86657100  |
| H | 5.68064500  | 1.18468900  | -0.86836100 |
| C | 6.96459100  | -0.11647100 | 0.27929000  |
| H | 7.10587900  | -0.86033800 | -0.50934200 |
| H | 7.82523800  | 0.55515400  | 0.26449000  |
| H | 6.96796100  | -0.64491200 | 1.23629900  |

**TS41: OH + CH<sub>3</sub>(CH<sub>2</sub>)<sub>10</sub>CH<sub>3</sub> → H<sub>2</sub>O + CH<sub>3</sub>(CH<sub>2</sub>)<sub>3</sub>CH(CH<sub>2</sub>)<sub>6</sub>CH<sub>3</sub>**

|   |             |             |             |
|---|-------------|-------------|-------------|
| C | -6.83287100 | -0.04760900 | 0.28261900  |
| H | -6.85269300 | 1.03996600  | 0.17571800  |
| H | -6.88565400 | -0.27648000 | 1.35025700  |
| H | -7.73118200 | -0.44855500 | -0.19081100 |
| C | -5.56366500 | -0.62959700 | -0.33443600 |

|   |             |             |             |
|---|-------------|-------------|-------------|
| H | -5.57611200 | -1.72148600 | -0.24456700 |
| H | -5.54053900 | -0.40841700 | -1.40721400 |
| C | -4.29510900 | -0.08440300 | 0.31707200  |
| H | -4.31608200 | -0.30554700 | 1.39115100  |
| H | -4.27293800 | 1.00755900  | 0.22537800  |
| C | -3.01707700 | -0.65830500 | -0.28923000 |
| H | -2.99723300 | -0.44922400 | -1.36646000 |
| H | -3.02076800 | -1.75216800 | -0.19087700 |
| C | -1.75416300 | -0.11088100 | 0.35232200  |
| H | -1.76187600 | -0.26212300 | 1.43830600  |
| H | -1.78477300 | 1.04102900  | 0.25184900  |
| C | -0.45269100 | -0.59734700 | -0.26093600 |
| H | -0.45466500 | -0.38327000 | -1.33777800 |
| H | -0.40433600 | -1.69081600 | -0.17099500 |
| C | 0.78578500  | 0.02367700  | 0.38091200  |
| H | 0.79160300  | -0.21084200 | 1.45212900  |
| H | 0.71903700  | 1.11517700  | 0.30433600  |
| C | 2.08933200  | -0.45911900 | -0.24947500 |
| H | 2.08315400  | -0.22499200 | -1.32121000 |
| H | 2.14770700  | -1.55203700 | -0.17422600 |
| C | 3.32959900  | 0.15754300  | 0.39265100  |
| H | 3.33611400  | -0.07511500 | 1.46448700  |
| H | 3.27177500  | 1.25007900  | 0.31593500  |
| C | 4.63380000  | -0.32531100 | -0.23640800 |
| H | 4.62770300  | -0.09366200 | -1.30870500 |
| H | 4.69193700  | -1.41817500 | -0.15904500 |
| C | 5.87578700  | 0.29084400  | 0.40365600  |
| H | 5.88049700  | 0.05923800  | 1.47436400  |
| H | 5.81670300  | 1.38191200  | 0.32483000  |
| C | 7.17120300  | -0.20223000 | -0.23584000 |
| H | 7.19597800  | 0.04194500  | -1.30122500 |
| H | 8.04848200  | 0.24912000  | 0.23172300  |
| H | 7.26234200  | -1.28777100 | -0.14267800 |
| O | -1.80636600 | 2.39275600  | -0.36828000 |
| H | -1.64282600 | 2.08903000  | -1.27587000 |

**OH-R42: OH + CH<sub>3</sub>(CH<sub>2</sub>)<sub>10</sub>CH<sub>3</sub> → H<sub>2</sub>O + CH<sub>3</sub>(CH<sub>2</sub>)<sub>4</sub>CH(CH<sub>2</sub>)<sub>5</sub>CH<sub>3</sub>  
CH<sub>3</sub>(CH<sub>2</sub>)<sub>4</sub>CH(CH<sub>2</sub>)<sub>5</sub>CH<sub>3</sub>**

|   |             |             |             |
|---|-------------|-------------|-------------|
| C | -6.97660000 | 0.01315500  | 0.38214300  |
| H | -7.17773900 | 0.77782000  | -0.37284500 |
| H | -6.95920800 | 0.50710500  | 1.35726500  |
| H | -7.81129800 | -0.69050000 | 0.37757100  |
| C | -5.64797700 | -0.68569400 | 0.10430200  |

|   |             |             |             |
|---|-------------|-------------|-------------|
| H | -5.47586800 | -1.46432700 | 0.85535800  |
| H | -5.69463900 | -1.19617000 | -0.86386600 |
| C | -4.46687000 | 0.28188300  | 0.10474100  |
| H | -4.41943400 | 0.79331200  | 1.07418200  |
| H | -4.63938100 | 1.06304500  | -0.64599400 |
| C | -3.12955000 | -0.39886800 | -0.17250900 |
| H | -3.17275900 | -0.90449600 | -1.14457600 |
| H | -2.95311100 | -1.17998600 | 0.57564500  |
| C | -1.95181200 | 0.57578800  | -0.16521800 |
| H | -1.90623800 | 1.08968700  | 0.80475500  |
| H | -2.14683700 | 1.37272400  | -0.90371300 |
| C | -0.63759900 | -0.06982100 | -0.44547000 |
| H | -0.62085300 | -0.95730200 | -1.07299500 |
| C | 0.64308800  | 0.65614900  | -0.20956400 |
| H | 0.59351400  | 1.17838700  | 0.75566900  |
| H | 0.77252200  | 1.45313500  | -0.96199200 |
| C | 1.87449300  | -0.24978200 | -0.23766300 |
| H | 1.92687400  | -0.75667000 | -1.20858200 |
| H | 1.75625400  | -1.03604800 | 0.51645900  |
| C | 3.17661000  | 0.50608800  | 0.01201700  |
| H | 3.11652500  | 1.01922600  | 0.97970900  |
| H | 3.29372000  | 1.29082700  | -0.74535900 |
| C | 4.40705800  | -0.39731200 | -0.00262700 |
| H | 4.47630800  | -0.90290300 | -0.97370700 |
| H | 4.28456200  | -1.18827400 | 0.74737300  |
| C | 5.70857500  | 0.35440900  | 0.26775400  |
| H | 5.63638300  | 0.85816000  | 1.23789200  |
| H | 5.83069500  | 1.14412100  | -0.48154500 |
| C | 6.92893500  | -0.56281000 | 0.25328700  |
| H | 7.03900800  | -1.04837900 | -0.71998600 |
| H | 7.84926700  | -0.01274800 | 0.45932500  |
| H | 6.83162600  | -1.34885900 | 1.00679400  |

**TS42: OH + CH<sub>3</sub>(CH<sub>2</sub>)<sub>10</sub>CH<sub>3</sub> → H<sub>2</sub>O + CH<sub>3</sub>(CH<sub>2</sub>)<sub>4</sub>CH(CH<sub>2</sub>)<sub>5</sub>CH<sub>3</sub>**

|   |             |             |             |
|---|-------------|-------------|-------------|
| C | -6.95475200 | -0.37546300 | -0.20194300 |
| H | -7.03186400 | -1.46111700 | -0.09807900 |
| H | -6.98530800 | -0.14176600 | -1.26950500 |
| H | -7.83655600 | 0.06917500  | 0.26342700  |
| C | -5.66444700 | 0.14054500  | 0.42970600  |
| H | -5.61889700 | 1.23128100  | 0.34063200  |
| H | -5.66344200 | -0.08130000 | 1.50242500  |
| C | -4.41642100 | -0.46576800 | -0.20793300 |
| H | -4.41687700 | -0.24376900 | -1.28236000 |

|   |             |             |             |
|---|-------------|-------------|-------------|
| H | -4.46040400 | -1.55859600 | -0.12038000 |
| C | -3.11820200 | 0.04234200  | 0.41314400  |
| H | -3.11750800 | -0.18085500 | 1.48682300  |
| H | -3.06697900 | 1.13358600  | 0.32366100  |
| C | -1.87291300 | -0.56727400 | -0.22635000 |
| H | -1.87721000 | -0.36253500 | -1.30482900 |
| H | -1.90476100 | -1.66039900 | -0.12551900 |
| C | -0.57717700 | -0.05543600 | 0.37820700  |
| H | -0.56260900 | -0.19821000 | 1.46528100  |
| H | -0.56836900 | 1.09603200  | 0.26905500  |
| C | 0.69171200  | -0.58813700 | -0.26403600 |
| H | 0.66680800  | -0.38480700 | -1.34241100 |
| H | 0.70989100  | -1.68143300 | -0.16157300 |
| C | 1.96428800  | 0.00391100  | 0.33683800  |
| H | 1.98922400  | -0.21265700 | 1.41157400  |
| H | 1.92882700  | 1.09511000  | 0.24110900  |
| C | 3.23644300  | -0.53059800 | -0.31579000 |
| H | 3.21113000  | -0.31532300 | -1.39112800 |
| H | 3.26318700  | -1.62326000 | -0.22142300 |
| C | 4.51008300  | 0.05852600  | 0.28501100  |
| H | 4.53401200  | -0.15120000 | 1.36141900  |
| H | 4.48655200  | 1.15054800  | 0.18575500  |
| C | 5.78502700  | -0.47951700 | -0.36047600 |
| H | 5.75936800  | -0.27112600 | -1.43567100 |
| H | 5.80698700  | -1.57003600 | -0.25817000 |
| C | 7.04926500  | 0.12029700  | 0.24983200  |
| H | 7.10335900  | -0.09461300 | 1.32031700  |
| H | 7.95126700  | -0.27908000 | -0.21796500 |
| H | 7.06128800  | 1.20670100  | 0.12920400  |
| O | -0.56766400 | 2.44310600  | -0.36146200 |
| H | -0.61723500 | 2.12423200  | -1.27722800 |

### 3.1.13 C13 (*n*-C<sub>13</sub>H<sub>28</sub>)

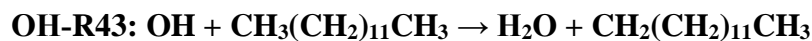

*n*-C<sub>13</sub>H<sub>28</sub>

|   |             |             |             |
|---|-------------|-------------|-------------|
| C | -7.63686300 | -0.40343800 | -0.00035400 |
| H | -7.66682700 | -1.04791200 | 0.88222500  |
| H | -7.66651700 | -1.04833000 | -0.88263900 |
| H | -8.54174800 | 0.20754800  | -0.00065800 |
| C | -6.37546600 | 0.45679100  | -0.00033800 |
| H | -6.37565800 | 1.11311400  | -0.87741700 |
| H | -6.37593200 | 1.11348900  | 0.87646100  |
| C | -5.09682400 | -0.37823500 | 0.00003500  |



|   |             |             |             |
|---|-------------|-------------|-------------|
| H | -5.09546900 | -1.03673900 | -0.87731900 |
| H | -5.09572300 | -1.03635400 | 0.87767800  |
| C | -3.82473100 | 0.46582800  | 0.00003100  |
| H | -3.82640600 | 1.12386400  | 0.87755600  |
| H | -3.82622800 | 1.12357500  | -0.87771100 |
| C | -2.54844000 | -0.37227200 | 0.00028900  |
| H | -2.54736800 | -1.03042300 | -0.87713400 |
| H | -2.54750700 | -1.03011300 | 0.87794400  |
| C | -1.27489000 | 0.46992200  | 0.00023500  |
| H | -1.27542500 | 1.12789800  | 0.87778600  |
| H | -1.27538500 | 1.12771300  | -0.87745500 |
| C | 0.00000100  | -0.37024000 | 0.00034200  |
| H | 0.00000300  | -1.02833000 | -0.87713600 |
| H | 0.00000100  | -1.02812600 | 0.87797400  |
| C | 1.27488900  | 0.46992600  | 0.00024000  |
| H | 1.27544700  | 1.12785500  | 0.87782700  |
| H | 1.27535700  | 1.12776500  | -0.87741400 |
| C | 2.54844100  | -0.37226500 | 0.00020900  |
| H | 2.54738000  | -1.03031100 | -0.87729200 |
| H | 2.54749800  | -1.03021100 | 0.87778500  |
| C | 3.82473200  | 0.46583500  | 0.00007200  |
| H | 3.82641000  | 1.12373500  | 0.87769900  |
| H | 3.82622700  | 1.12371800  | -0.87756700 |
| C | 5.09682300  | -0.37823100 | -0.00005800 |
| H | 5.09549300  | -1.03655200 | -0.87754900 |
| H | 5.09569100  | -1.03653300 | 0.87744800  |
| C | 6.37546900  | 0.45679000  | -0.00021300 |
| H | 6.37591500  | 1.11329100  | 0.87673300  |
| H | 6.37568700  | 1.11331000  | -0.87714500 |
| C | 7.63686100  | -0.40344500 | -0.00038700 |
| H | 7.66655100  | -1.04811900 | -0.88283000 |
| H | 8.54174900  | 0.20753600  | -0.00050000 |
| H | 7.66678400  | -1.04813700 | 0.88203400  |

**CH<sub>2</sub>(CH<sub>2</sub>)<sub>11</sub>CH<sub>3</sub>**

|   |            |             |             |
|---|------------|-------------|-------------|
| C | 7.68853600 | -0.38745300 | -0.02650300 |
| H | 7.70554400 | -1.35792300 | 0.45437800  |
| H | 8.62775500 | 0.02071900  | -0.37480200 |
| C | 6.44900200 | 0.43691100  | -0.00537900 |
| H | 6.43458000 | 1.07778200  | 0.89163700  |
| H | 6.44576500 | 1.12869100  | -0.85569900 |
| C | 5.16901400 | -0.40208100 | -0.02100300 |
| H | 5.17752900 | -1.08375500 | 0.83780900  |

|   |             |             |             |
|---|-------------|-------------|-------------|
| H | 5.16519800  | -1.03247500 | -0.91723000 |
| C | 3.89990500  | 0.44483700  | 0.01444700  |
| H | 3.89696200  | 1.12877500  | -0.84302500 |
| H | 3.90825900  | 1.07583700  | 0.91161200  |
| C | 2.62231600  | -0.39094400 | -0.00364300 |
| H | 2.62207500  | -1.07107000 | 0.85677300  |
| H | 2.61793900  | -1.02605700 | -0.89776700 |
| C | 1.35096900  | 0.45421400  | 0.02067300  |
| H | 1.35161600  | 1.13376200  | -0.84024400 |
| H | 1.35473200  | 1.08996400  | 0.91443700  |
| C | 0.07385100  | -0.38229000 | 0.00150800  |
| H | 0.07165100  | -1.05994200 | 0.86391800  |
| H | 0.07223600  | -1.02018200 | -0.89074300 |
| C | -1.19832400 | 0.46175000  | 0.02001100  |
| H | -1.19564200 | 1.13972700  | -0.84215400 |
| H | -1.19774200 | 1.09921800  | 0.91256900  |
| C | -2.47472600 | -0.37580100 | -0.00135800 |
| H | -2.47814200 | -1.05293900 | 0.86145400  |
| H | -2.47397900 | -1.01430500 | -0.89317600 |
| C | -3.74785900 | 0.46693800  | 0.01402400  |
| H | -3.74397700 | 1.14480300  | -0.84824800 |
| H | -3.74992600 | 1.10456100  | 0.90649100  |
| C | -5.02320600 | -0.37180700 | -0.01005600 |
| H | -5.02811700 | -1.04983400 | 0.85225800  |
| H | -5.02107100 | -1.01007000 | -0.90224200 |
| C | -6.29842500 | 0.46832700  | 0.00376200  |
| H | -6.29158300 | 1.14566700  | -0.85713100 |
| H | -6.30055200 | 1.10366000  | 0.89616700  |
| C | -7.56333200 | -0.38623900 | -0.02377600 |
| H | -7.60111800 | -1.05162000 | 0.84279300  |
| H | -8.46564600 | 0.22845800  | -0.01458400 |
| H | -7.59066200 | -1.00961300 | -0.92148200 |

**TS43: OH + CH<sub>3</sub>(CH<sub>2</sub>)<sub>11</sub>CH<sub>3</sub> → H<sub>2</sub>O + CH<sub>2</sub>(CH<sub>2</sub>)<sub>11</sub>CH<sub>3</sub>**

|   |            |             |             |
|---|------------|-------------|-------------|
| C | 6.85602300 | 0.73941500  | -0.00153400 |
| H | 6.96274800 | 1.29784900  | 0.93043000  |
| H | 6.89869000 | 1.42159700  | -0.85341000 |
| H | 7.82696400 | 0.10058300  | -0.11039800 |
| C | 5.63689300 | -0.16166100 | -0.02549900 |
| H | 5.65665100 | -0.78236400 | -0.92681700 |
| H | 5.66205400 | -0.84761900 | 0.82860400  |
| C | 4.33013400 | 0.63507400  | 0.01259200  |
| H | 4.29985000 | 1.31654400  | -0.84568200 |

|   |             |             |             |
|---|-------------|-------------|-------------|
| H | 4.31495800  | 1.26598300  | 0.90924400  |
| C | 3.08998600  | -0.25572300 | -0.00359500 |
| H | 3.11660600  | -0.93123800 | 0.85995300  |
| H | 3.11348800  | -0.89355800 | -0.89529400 |
| C | 1.78594800  | 0.53823700  | 0.01550600  |
| H | 1.76045600  | 1.21212300  | -0.84938100 |
| H | 1.76458900  | 1.17889200  | 0.90547600  |
| C | 0.54254600  | -0.34771700 | 0.00103200  |
| H | 0.56470900  | -1.01871100 | 0.86833300  |
| H | 0.56584000  | -0.99127600 | -0.88678000 |
| C | -0.75993900 | 0.44887600  | 0.01231800  |
| H | -0.78113300 | 1.11951600  | -0.85530700 |
| H | -0.78245600 | 1.09331900  | 0.89958800  |
| C | -2.00574600 | -0.43359300 | -0.00217200 |
| H | -1.98627100 | -1.10312400 | 0.86635800  |
| H | -1.98309500 | -1.07895600 | -0.88874100 |
| C | -3.30637800 | 0.36605900  | 0.00638500  |
| H | -3.32523200 | 1.03542200  | -0.86229200 |
| H | -3.32814100 | 1.01200800  | 0.89258000  |
| C | -4.55448700 | -0.51324500 | -0.00757800 |
| H | -4.53634800 | -1.18260600 | 0.86114200  |
| H | -4.53374000 | -1.15895800 | -0.89397200 |
| C | -5.85311700 | 0.28931500  | 0.00141600  |
| H | -5.87178100 | 0.95881200  | -0.86737000 |
| H | -5.87364000 | 0.93583000  | 0.88742300  |
| C | -7.10438600 | -0.58601900 | -0.01142500 |
| H | -7.08436000 | -1.25450000 | 0.85617400  |
| H | -7.08402100 | -1.22978900 | -0.89753500 |
| C | -8.39231400 | 0.23384300  | 0.00009100  |
| H | -8.44256100 | 0.88955200  | -0.87323000 |
| H | -9.27762900 | -0.40505200 | -0.00847200 |
| H | -8.44204000 | 0.86499100  | 0.89139300  |
| O | 8.83913000  | -0.89710000 | -0.07944900 |
| H | 8.52083900  | -1.36562900 | 0.70835400  |

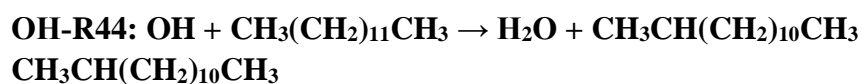

|   |             |             |             |
|---|-------------|-------------|-------------|
| C | -7.73109200 | -0.25828200 | -0.12592400 |
| H | -8.00551900 | -0.83773600 | 0.76844500  |
| H | -7.71427300 | -0.96827300 | -0.95997900 |
| H | -8.53260500 | 0.45981700  | -0.30543200 |
| C | -6.40949000 | 0.40996300  | 0.03546500  |
| H | -6.37344000 | 1.43702900  | 0.38307600  |

|   |             |             |             |
|---|-------------|-------------|-------------|
| C | -5.15486400 | -0.39475900 | 0.06618900  |
| H | -5.15881200 | -1.10916800 | -0.76921700 |
| H | -5.12929400 | -1.01930100 | 0.97594100  |
| C | -3.88239300 | 0.44996300  | 0.01118300  |
| H | -3.87979500 | 1.14954900  | 0.85543800  |
| H | -3.89722500 | 1.06145900  | -0.89814500 |
| C | -2.60664400 | -0.38707000 | 0.04312500  |
| H | -2.61003300 | -1.08529500 | -0.80275600 |
| H | -2.59897300 | -1.00324600 | 0.95056100  |
| C | -1.33488100 | 0.45629100  | -0.00480100 |
| H | -1.32976900 | 1.15199300  | 0.84308900  |
| H | -1.34387500 | 1.07510500  | -0.91026800 |
| C | -0.05812900 | -0.38054900 | 0.02194300  |
| H | -0.06156900 | -1.07371400 | -0.82804500 |
| H | -0.05130900 | -1.00223200 | 0.92555700  |
| C | 1.21420900  | 0.46235300  | -0.01989600 |
| H | 1.21741600  | 1.15535900  | 0.83023200  |
| H | 1.20795400  | 1.08418100  | -0.92338800 |
| C | 2.49054800  | -0.37508900 | 0.00775900  |
| H | 2.48878800  | -1.06644800 | -0.84370200 |
| H | 2.49493400  | -0.99877900 | 0.90999800  |
| C | 3.76362400  | 0.46703100  | -0.02908200 |
| H | 3.76436900  | 1.15943900  | 0.82156400  |
| H | 3.76091400  | 1.08952800  | -0.93215800 |
| C | 5.03915600  | -0.37115900 | 0.00254900  |
| H | 5.04043600  | -1.06279300 | -0.84890000 |
| H | 5.04098000  | -0.99524400 | 0.90471300  |
| C | 6.31411600  | 0.46881900  | -0.03005500 |
| H | 6.31016400  | 1.16035300  | 0.81948500  |
| H | 6.31287600  | 1.08935700  | -0.93281200 |
| C | 7.57941300  | -0.38475200 | 0.00731600  |
| H | 7.61549800  | -1.06342900 | -0.84892200 |
| H | 8.48144200  | 0.23009300  | -0.01348900 |
| H | 7.60929400  | -0.99416700 | 0.91447800  |

**TS44: OH + CH<sub>3</sub>(CH<sub>2</sub>)<sub>11</sub>CH<sub>3</sub> → H<sub>2</sub>O + CH<sub>3</sub>CH(CH<sub>2</sub>)<sub>10</sub>CH<sub>3</sub>**

|   |            |             |             |
|---|------------|-------------|-------------|
| C | 7.13854600 | -0.87829300 | -0.13009600 |
| H | 7.15765400 | -0.93210900 | -1.22088900 |
| H | 7.17536100 | -1.90162300 | 0.25692700  |
| H | 8.03916000 | -0.35888500 | 0.20064800  |
| C | 5.88118100 | -0.17614500 | 0.35158300  |
| H | 5.88433600 | -0.05008500 | 1.43934300  |
| H | 5.91407300 | 0.89277600  | -0.07610700 |

|   |             |             |             |
|---|-------------|-------------|-------------|
| C | 4.58178500  | -0.80722300 | -0.11812300 |
| H | 4.52403300  | -1.83036500 | 0.27772200  |
| H | 4.59965100  | -0.89818200 | -1.21025000 |
| C | 3.34240900  | -0.02511500 | 0.30899000  |
| H | 3.39768600  | 0.98344700  | -0.11729700 |
| H | 3.34503000  | 0.09220100  | 1.40008300  |
| C | 2.03610000  | -0.68584200 | -0.12325900 |
| H | 1.97894400  | -1.69454600 | 0.30370200  |
| H | 2.03839000  | -0.81198800 | -1.21257500 |
| C | 0.79939900  | 0.10818900  | 0.29030100  |
| H | 0.85738500  | 1.11580600  | -0.13908000 |
| H | 0.79882300  | 0.23758500  | 1.37956900  |
| C | -0.50931100 | -0.54912500 | -0.14016300 |
| H | -0.57015600 | -1.55545900 | 0.29198700  |
| H | -0.50674100 | -0.68198300 | -1.22884200 |
| C | -1.74452600 | 0.25047200  | 0.26728600  |
| H | -1.68161400 | 1.25706700  | -0.16397000 |
| H | -1.74804900 | 0.38277300  | 1.35613000  |
| C | -3.05436700 | -0.40279200 | -0.16596000 |
| H | -3.12029700 | -1.40805000 | 0.26795900  |
| H | -3.04898900 | -0.53805000 | -1.25437200 |
| C | -4.28818500 | 0.40193100  | 0.23583000  |
| H | -4.21992800 | 1.40784100  | -0.19630100 |
| H | -4.29527700 | 0.53555800  | 1.32449800  |
| C | -5.59867200 | -0.24685200 | -0.20148400 |
| H | -5.67049200 | -1.25167600 | 0.23293200  |
| H | -5.59076700 | -0.38351400 | -1.28988100 |
| C | -6.83242900 | 0.56137600  | 0.19452000  |
| H | -6.75798000 | 1.56470900  | -0.23906000 |
| H | -6.84041200 | 0.69574000  | 1.28168100  |
| C | -8.13460900 | -0.09768000 | -0.25253200 |
| H | -8.24212900 | -1.08982500 | 0.19401400  |
| H | -9.00555900 | 0.49492400  | 0.03463900  |
| H | -8.15537200 | -0.21983000 | -1.33870900 |
| O | 5.83111300  | 2.32244000  | -0.49522000 |
| H | 5.39040700  | 2.64882500  | 0.30589600  |

**OH-R45: OH + CH<sub>3</sub>(CH<sub>2</sub>)<sub>11</sub>CH<sub>3</sub> → H<sub>2</sub>O + CH<sub>3</sub>CH<sub>2</sub>CH(CH<sub>2</sub>)<sub>9</sub>CH<sub>3</sub>  
CH<sub>3</sub>CH<sub>2</sub>CH(CH<sub>2</sub>)<sub>9</sub>CH<sub>3</sub>**

|   |            |             |             |
|---|------------|-------------|-------------|
| C | 7.61107100 | -0.60952000 | 0.14752100  |
| H | 7.68264900 | -1.15581200 | -0.79624200 |
| H | 7.45942800 | -1.33994100 | 0.94551300  |
| H | 8.56599000 | -0.10996300 | 0.32003500  |

|   |             |             |             |
|---|-------------|-------------|-------------|
| C | 6.45608000  | 0.38906800  | 0.10450900  |
| H | 6.42168600  | 0.96284400  | 1.04024600  |
| H | 6.64979900  | 1.13730300  | -0.68136300 |
| C | 5.13124400  | -0.25449900 | -0.12800200 |
| H | 5.10365100  | -1.24449600 | -0.57579700 |
| C | 3.87240300  | 0.54242800  | -0.08226900 |
| H | 3.82828900  | 1.22699700  | -0.94691600 |
| H | 3.88411900  | 1.19720700  | 0.80015100  |
| C | 2.60606600  | -0.31384900 | -0.06753300 |
| H | 2.63139400  | -0.97621600 | 0.80515300  |
| H | 2.60291500  | -0.96408100 | -0.95041300 |
| C | 1.32409500  | 0.51394600  | -0.04427300 |
| H | 1.30426700  | 1.17620900  | -0.91847000 |
| H | 1.32951200  | 1.16727700  | 0.83676100  |
| C | 0.05915100  | -0.34087300 | -0.03039100 |
| H | 0.07722500  | -1.00112400 | 0.84517800  |
| H | 0.05557000  | -0.99625800 | -0.90986100 |
| C | -1.22448500 | 0.48566800  | -0.01248900 |
| H | -1.24166000 | 1.14653700  | -0.88771200 |
| H | -1.22185200 | 1.14050000  | 0.86739800  |
| C | -2.48923700 | -0.36954800 | -0.00129300 |
| H | -2.47321300 | -1.02916600 | 0.87486400  |
| H | -2.49031900 | -1.02576200 | -0.88016000 |
| C | -3.77355700 | 0.45607200  | 0.01267200  |
| H | -3.78902900 | 1.11627600  | -0.86310500 |
| H | -3.77362200 | 1.11161900  | 0.89206000  |
| C | -5.03760200 | -0.39991100 | 0.02139600  |
| H | -5.02379600 | -1.05939200 | 0.89790700  |
| H | -5.03701400 | -1.05694800 | -0.85705500 |
| C | -6.32373800 | 0.42345300  | 0.03214400  |
| H | -6.33608700 | 1.08132100  | -0.84370000 |
| H | -6.32360900 | 1.07860600  | 0.91010600  |
| C | -7.57740200 | -0.44793500 | 0.03975800  |
| H | -7.59611600 | -1.09328200 | 0.92200100  |
| H | -8.48755700 | 0.15513300  | 0.04576300  |
| H | -7.60716100 | -1.09238100 | -0.84284600 |

**TS45: OH + CH<sub>3</sub>(CH<sub>2</sub>)<sub>11</sub>CH<sub>3</sub> → H<sub>2</sub>O + CH<sub>3</sub>CH<sub>2</sub>CH(CH<sub>2</sub>)<sub>9</sub>CH<sub>3</sub>**

|   |             |             |             |
|---|-------------|-------------|-------------|
| C | -7.22704800 | -0.09683800 | 0.28867700  |
| H | -7.20767700 | 0.94377900  | -0.04386200 |
| H | -7.28519400 | -0.10032900 | 1.38040900  |
| H | -8.13533500 | -0.56309500 | -0.09712300 |
| C | -5.97574300 | -0.82777600 | -0.19038000 |

|   |             |             |             |
|---|-------------|-------------|-------------|
| H | -5.99437400 | -1.87090200 | 0.14910200  |
| H | -5.95579500 | -0.85714700 | -1.28449500 |
| C | -4.69758200 | -0.17459700 | 0.30865200  |
| H | -4.70769600 | -0.07402100 | 1.40061100  |
| H | -4.71631000 | 0.90279400  | -0.09413400 |
| C | -3.40515100 | -0.81068600 | -0.17154900 |
| H | -3.42415700 | -0.88614900 | -1.26472000 |
| H | -3.35254300 | -1.83895800 | 0.21084400  |
| C | -2.16141400 | -0.03983200 | 0.26459300  |
| H | -2.16146000 | 0.06107400  | 1.35725200  |
| H | -2.21507600 | 0.97574800  | -0.14516900 |
| C | -0.85843100 | -0.69846400 | -0.18027200 |
| H | -0.86435200 | -0.81133000 | -1.27106400 |
| H | -0.80268000 | -1.71247200 | 0.23416800  |
| C | 0.38168900  | 0.08713600  | 0.23908800  |
| H | 0.38376300  | 0.20685200  | 1.32947200  |
| H | 0.32707700  | 1.09873600  | -0.18121200 |
| C | 1.68752400  | -0.57134900 | -0.19822600 |
| H | 1.68308400  | -0.69623100 | -1.28785900 |
| H | 1.74541800  | -1.58102800 | 0.22644200  |
| C | 2.92604500  | 0.22086400  | 0.21355800  |
| H | 2.93022800  | 0.34691400  | 1.30314400  |
| H | 2.86727200  | 1.23016000  | -0.21187000 |
| C | 4.23323700  | -0.43533200 | -0.22335900 |
| H | 4.22769200  | -0.56408300 | -1.31259000 |
| H | 4.29459900  | -1.44344900 | 0.20460100  |
| C | 5.47025200  | 0.36127600  | 0.18386900  |
| H | 5.47761400  | 0.48921200  | 1.27336700  |
| H | 5.40815900  | 1.37014900  | -0.24255500 |
| C | 6.77930500  | -0.29064300 | -0.25487200 |
| H | 6.77081300  | -0.41720600 | -1.34294400 |
| H | 6.84065500  | -1.29779700 | 0.17173300  |
| C | 8.00547600  | 0.51896800  | 0.15975900  |
| H | 8.04766400  | 0.63128200  | 1.24641300  |
| H | 8.93232500  | 0.04141100  | -0.16417000 |
| H | 7.97418900  | 1.52134900  | -0.27548300 |
| O | -4.71333700 | 2.34268200  | -0.52493300 |
| H | -4.33015100 | 2.69690200  | 0.29393500  |

**OH-R46: OH + CH<sub>3</sub>(CH<sub>2</sub>)<sub>11</sub>CH<sub>3</sub> → H<sub>2</sub>O + CH<sub>3</sub>(CH<sub>2</sub>)<sub>2</sub>CH(CH<sub>2</sub>)<sub>8</sub>CH<sub>3</sub>  
CH<sub>3</sub>(CH<sub>2</sub>)<sub>2</sub>CH(CH<sub>2</sub>)<sub>8</sub>CH<sub>3</sub>**

|   |            |             |             |
|---|------------|-------------|-------------|
| C | 7.66973400 | -0.10026800 | 0.31236800  |
| H | 7.91156700 | -0.71200700 | -0.56089500 |

|   |             |             |             |
|---|-------------|-------------|-------------|
| H | 7.65856800  | -0.75806700 | 1.18551000  |
| H | 8.47615700  | 0.62288200  | 0.44851000  |
| C | 6.32133300  | 0.59172700  | 0.13619700  |
| H | 6.10634300  | 1.22070900  | 1.00582100  |
| H | 6.35765000  | 1.26078000  | -0.73002200 |
| C | 5.17248000  | -0.40012800 | -0.05204800 |
| H | 5.12977200  | -1.07996000 | 0.81021800  |
| H | 5.40201700  | -1.04687300 | -0.91665200 |
| C | 3.84647100  | 0.25476100  | -0.23725100 |
| H | 3.81798100  | 1.25047500  | -0.67245200 |
| C | 2.57987200  | -0.52908100 | -0.17625200 |
| H | 2.59684500  | -1.18655900 | 0.70401300  |
| H | 2.51463400  | -1.21050800 | -1.04205300 |
| C | 1.32500300  | 0.34325000  | -0.13981900 |
| H | 1.31453800  | 0.99252100  | -1.02334800 |
| H | 1.37522100  | 1.00643700  | 0.73124800  |
| C | 0.03214100  | -0.46612900 | -0.09174000 |
| H | 0.04343400  | -1.11724000 | 0.79086500  |
| H | -0.01268400 | -1.13025000 | -0.96363000 |
| C | -1.21935100 | 0.40776300  | -0.05781500 |
| H | -1.22887300 | 1.06021500  | -0.93941900 |
| H | -1.17532400 | 1.07074600  | 0.81480800  |
| C | -2.51501600 | -0.39860700 | -0.01343200 |
| H | -2.50731100 | -1.04930100 | 0.86947200  |
| H | -2.55747200 | -1.06333400 | -0.88488500 |
| C | -3.76620800 | 0.47600500  | 0.01532900  |
| H | -3.77261100 | 1.12776100  | -0.86684700 |
| H | -3.72518100 | 1.13973700  | 0.88761900  |
| C | -5.06190900 | -0.33017900 | 0.05592900  |
| H | -5.05789700 | -0.98020600 | 0.93956200  |
| H | -5.10176500 | -0.99629900 | -0.81477600 |
| C | -6.31497200 | 0.54242500  | 0.07920600  |
| H | -6.31754200 | 1.19066500  | -0.80384800 |
| H | -6.27475400 | 1.20672700  | 0.94935400  |
| C | -7.60076600 | -0.27983700 | 0.11861500  |
| H | -7.62866100 | -0.91381300 | 1.00884400  |
| H | -8.48713300 | 0.35753600  | 0.13256100  |
| H | -7.67039500 | -0.93299000 | -0.75531000 |

**TS46: OH + CH<sub>3</sub>(CH<sub>2</sub>)<sub>11</sub>CH<sub>3</sub> → H<sub>2</sub>O + CH<sub>3</sub>(CH<sub>2</sub>)<sub>2</sub>CH(CH<sub>2</sub>)<sub>8</sub>CH<sub>3</sub>**

|   |             |             |             |
|---|-------------|-------------|-------------|
| C | -7.34121100 | -0.62271900 | -0.23185400 |
| H | -7.43659200 | -1.64702400 | 0.13831800  |
| H | -7.33562500 | -0.66303300 | -1.32416200 |



|   |             |             |             |
|---|-------------|-------------|-------------|
| H | -8.23078500 | -0.07049200 | 0.07725800  |
| C | -6.06601200 | 0.03195000  | 0.29200500  |
| H | -5.99909100 | 1.06406900  | -0.06636300 |
| H | -6.09826700 | 0.08211900  | 1.38606500  |
| C | -4.80627400 | -0.71666900 | -0.13803400 |
| H | -4.77520100 | -0.78104400 | -1.23194500 |
| H | -4.84652300 | -1.75007500 | 0.23254300  |
| C | -3.52803100 | -0.06340000 | 0.35872800  |
| H | -3.54331100 | 0.05498100  | 1.44870500  |
| H | -3.53475800 | 1.00761300  | -0.06195800 |
| C | -2.23684100 | -0.71564500 | -0.10376200 |
| H | -2.24817200 | -0.80246300 | -1.19617800 |
| H | -2.19568100 | -1.74028800 | 0.28953600  |
| C | -0.99033500 | 0.05012600  | 0.33315300  |
| H | -0.99041900 | 0.15181100  | 1.42571300  |
| H | -1.03979900 | 1.06554200  | -0.07749300 |
| C | 0.31042700  | -0.61277500 | -0.11191600 |
| H | 0.30229000  | -0.72735800 | -1.20252100 |
| H | 0.36510900  | -1.62617600 | 0.30411700  |
| C | 1.55257800  | 0.17201600  | 0.30298400  |
| H | 1.56154300  | 0.28777200  | 1.39375800  |
| H | 1.49408400  | 1.18508900  | -0.11326400 |
| C | 2.85637500  | -0.48260300 | -0.14600000 |
| H | 2.84326300  | -0.60498300 | -1.23585400 |
| H | 2.92055600  | -1.49306300 | 0.27585600  |
| C | 4.09615300  | 0.31243900  | 0.25668800  |
| H | 4.11161700  | 0.43318900  | 1.34680600  |
| H | 4.02855400  | 1.32355000  | -0.16317500 |
| C | 5.40104300  | -0.33563700 | -0.19800400 |
| H | 5.38360000  | -0.46133300 | -1.28762300 |
| H | 5.47379400  | -1.34489700 | 0.22579000  |
| C | 6.64016000  | 0.46561500  | 0.19546000  |
| H | 6.65778800  | 0.58922800  | 1.28381100  |
| H | 6.56443800  | 1.47331100  | -0.22761600 |
| C | 7.93685900  | -0.19193500 | -0.26936300 |
| H | 7.94789200  | -0.30354200 | -1.35680900 |
| H | 8.81156600  | 0.39602200  | 0.01593900  |
| H | 8.04602800  | -1.18854800 | 0.16666700  |
| O | -3.50588000 | 2.44313000  | -0.50355300 |
| H | -3.14020700 | 2.80039700  | 0.32199800  |

**OH-R47: OH + CH<sub>3</sub>(CH<sub>2</sub>)<sub>11</sub>CH<sub>3</sub> → H<sub>2</sub>O + CH<sub>3</sub>(CH<sub>2</sub>)<sub>3</sub>CH(CH<sub>2</sub>)<sub>7</sub>CH<sub>3</sub>  
CH<sub>3</sub>(CH<sub>2</sub>)<sub>3</sub>CH(CH<sub>2</sub>)<sub>7</sub>CH<sub>3</sub>**

|   |             |             |             |
|---|-------------|-------------|-------------|
| C | 7.55310200  | -0.73303400 | 0.26165400  |
| H | 7.63693100  | -1.25199800 | -0.69678800 |
| H | 8.50674900  | -0.24017200 | 0.46040000  |
| H | 7.39848100  | -1.48947300 | 1.03544400  |
| C | 6.39773600  | 0.26457500  | 0.23941800  |
| H | 6.34653900  | 0.79144400  | 1.19844400  |
| H | 6.58420400  | 1.02891200  | -0.52284500 |
| C | 5.05339100  | -0.40318800 | -0.03804300 |
| H | 5.10022100  | -0.92696100 | -1.00029300 |
| H | 4.86107100  | -1.16914900 | 0.72186400  |
| C | 3.88568200  | 0.58313400  | -0.06052600 |
| H | 3.83451300  | 1.11462900  | 0.89963800  |
| H | 4.09608000  | 1.36486300  | -0.81074000 |
| C | 2.56992700  | -0.05760000 | -0.34439400 |
| H | 2.55504100  | -0.96626100 | -0.94050200 |
| C | 1.29176100  | 0.68447500  | -0.14952600 |
| H | 1.20155300  | 1.48767900  | -0.90103000 |
| H | 1.31262900  | 1.20119700  | 0.81986100  |
| C | 0.05091300  | -0.20506500 | -0.22881200 |
| H | 0.12704700  | -0.99315200 | 0.52878200  |
| H | 0.03381600  | -0.71084100 | -1.20144700 |
| C | -1.25195500 | 0.56589000  | -0.03573500 |
| H | -1.32353900 | 1.35449200  | -0.79468600 |
| H | -1.23173300 | 1.07484200  | 0.93561900  |
| C | -2.49099300 | -0.32286700 | -0.11317000 |
| H | -2.41847300 | -1.11216500 | 0.64476100  |
| H | -2.51211900 | -0.83095900 | -1.08488800 |
| C | -3.79544600 | 0.44614400  | 0.08246200  |
| H | -3.86776300 | 1.23605000  | -0.67499700 |
| H | -3.77454400 | 0.95357800  | 1.05457100  |
| C | -5.03431700 | -0.44250000 | 0.00418800  |
| H | -4.96261800 | -1.23296100 | 0.76130400  |
| H | -5.05625200 | -0.95009900 | -0.96796300 |
| C | -6.33996600 | 0.32491100  | 0.20031300  |
| H | -6.41053500 | 1.11337700  | -0.55679500 |
| H | -6.31667100 | 0.83131600  | 1.17133400  |
| C | -7.56881500 | -0.57748600 | 0.11986000  |
| H | -7.53018900 | -1.35575400 | 0.88653900  |
| H | -8.49284200 | -0.01341100 | 0.26109200  |
| H | -7.62372400 | -1.07335500 | -0.85281700 |

**TS47: OH + CH<sub>3</sub>(CH<sub>2</sub>)<sub>11</sub>CH<sub>3</sub> → H<sub>2</sub>O + CH<sub>3</sub>(CH<sub>2</sub>)<sub>3</sub>CH(CH<sub>2</sub>)<sub>7</sub>CH<sub>3</sub>**

|   |             |            |            |
|---|-------------|------------|------------|
| C | -7.42504400 | 0.10751100 | 0.22426500 |
|---|-------------|------------|------------|

|   |             |             |             |
|---|-------------|-------------|-------------|
| H | -7.40004200 | 1.15737200  | -0.07940800 |
| H | -7.49296900 | 0.07934000  | 1.31506500  |
| H | -8.33669200 | -0.33700200 | -0.17978000 |
| C | -6.17750900 | -0.62588900 | -0.26142300 |
| H | -6.22822100 | -1.67913700 | 0.03636700  |
| H | -6.14627700 | -0.61535300 | -1.35619500 |
| C | -4.89011300 | -0.00921500 | 0.28004900  |
| H | -4.92246300 | -0.00834600 | 1.37673900  |
| H | -4.82687900 | 1.04003200  | -0.03102600 |
| C | -3.63326000 | -0.73857500 | -0.18748200 |
| H | -3.61239400 | -0.76814000 | -1.28296800 |
| H | -3.66437300 | -1.78312000 | 0.15105300  |
| C | -2.35247800 | -0.09496700 | 0.31572800  |
| H | -2.36537900 | 0.00987100  | 1.40714600  |
| H | -2.35579700 | 0.98037600  | -0.09277600 |
| C | -1.06378300 | -0.74477400 | -0.15699400 |
| H | -1.07955900 | -0.82337000 | -1.25000400 |
| H | -1.02216000 | -1.77235000 | 0.22855100  |
| C | 0.18505500  | 0.01669900  | 0.28078500  |
| H | 0.18722700  | 0.11345100  | 1.37380100  |
| H | 0.13641400  | 1.03408800  | -0.12483800 |
| C | 1.48317900  | -0.64790100 | -0.16938800 |
| H | 1.47148300  | -0.76127800 | -1.26010400 |
| H | 1.53715100  | -1.66193000 | 0.24528000  |
| C | 2.72843100  | 0.13353400  | 0.24253000  |
| H | 2.73842200  | 0.25231900  | 1.33296700  |
| H | 2.67361000  | 1.14563200  | -0.17648700 |
| C | 4.02938400  | -0.52787800 | -0.20490400 |
| H | 4.01558300  | -0.65374900 | -1.29437700 |
| H | 4.08910700  | -1.53729200 | 0.22019600  |
| C | 5.27276500  | 0.26233500  | 0.19530700  |
| H | 5.28778600  | 0.38926100  | 1.28486800  |
| H | 5.21267000  | 1.27180300  | -0.22994100 |
| C | 6.57579200  | -0.39538100 | -0.25259400 |
| H | 6.55859700  | -0.52282700 | -1.34046100 |
| H | 6.63626000  | -1.40238900 | 0.17446600  |
| C | 7.80828200  | 0.40972800  | 0.15193500  |
| H | 7.85875600  | 0.52362900  | 1.23809100  |
| H | 8.73077900  | -0.07221400 | -0.17784000 |
| H | 7.77803000  | 1.41149700  | -0.28477400 |
| O | -2.33444900 | 2.41689900  | -0.53507400 |
| H | -2.02729700 | 2.78327600  | 0.31008400  |

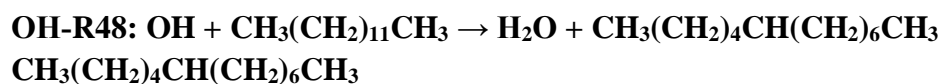

|   |             |             |             |
|---|-------------|-------------|-------------|
| C | 7.65735500  | -0.17303300 | 0.13523400  |
| H | 7.76843200  | -0.82171500 | -0.73776200 |
| H | 7.69691100  | -0.80643000 | 1.02543300  |
| H | 8.51631400  | 0.50022700  | 0.16400600  |
| C | 6.33971000  | 0.59568900  | 0.07541900  |
| H | 6.25965400  | 1.25950500  | 0.94315500  |
| H | 6.32874300  | 1.24180000  | -0.80912100 |
| C | 5.12448400  | -0.32791400 | 0.03573300  |
| H | 5.13213400  | -0.97355100 | 0.92257800  |
| H | 5.20695400  | -0.99598800 | -0.83066100 |
| C | 3.79840800  | 0.42397900  | -0.03182200 |
| H | 3.79179100  | 1.06934200  | -0.91821900 |
| H | 3.70756400  | 1.08770500  | 0.83565300  |
| C | 2.58643700  | -0.50526700 | -0.08151400 |
| H | 2.58669000  | -1.15740400 | 0.80370700  |
| H | 2.69727800  | -1.19086900 | -0.93929600 |
| C | 1.28245700  | 0.21142200  | -0.17249700 |
| H | 1.27295500  | 1.23589800  | -0.53432500 |
| C | -0.00487300 | -0.53714500 | -0.10469800 |
| H | 0.00123900  | -1.20093700 | 0.77169600  |
| H | -0.09038700 | -1.21315200 | -0.97296000 |
| C | -1.23937100 | 0.36222100  | -0.05600100 |
| H | -1.23629000 | 1.02243800  | -0.93138700 |
| H | -1.17648700 | 1.01289500  | 0.82368000  |
| C | -2.54762300 | -0.42283300 | -0.02005400 |
| H | -2.55075800 | -1.08391700 | 0.85516300  |
| H | -2.60065300 | -1.07665100 | -0.89930100 |
| C | -3.78504200 | 0.47055200  | 0.01809800  |
| H | -3.77757500 | 1.13676100  | -0.85318300 |
| H | -3.73890800 | 1.11878800  | 0.90163700  |
| C | -5.09205600 | -0.31810000 | 0.03791700  |
| H | -5.10181600 | -0.98306500 | 0.91030800  |
| H | -5.13539200 | -0.96880200 | -0.84425100 |
| C | -6.33370900 | 0.57027000  | 0.06853400  |
| H | -6.32097200 | 1.23551900  | -0.80167700 |
| H | -6.29243300 | 1.21685500  | 0.95187700  |
| C | -7.63001100 | -0.23626900 | 0.08093900  |
| H | -7.67288400 | -0.88832700 | 0.95738900  |
| H | -8.50850600 | 0.41170300  | 0.10123200  |
| H | -7.70059200 | -0.87006600 | -0.80709100 |

**TS48: OH + CH<sub>3</sub>(CH<sub>2</sub>)<sub>11</sub>CH<sub>3</sub> → H<sub>2</sub>O + CH<sub>3</sub>(CH<sub>2</sub>)<sub>4</sub>CH(CH<sub>2</sub>)<sub>6</sub>CH<sub>3</sub>**

|   |             |             |             |
|---|-------------|-------------|-------------|
| C | -7.53508400 | -0.44207400 | -0.27294400 |
| H | -7.64218900 | -1.44484700 | 0.14917100  |
| H | -7.53062200 | -0.53969400 | -1.36173200 |
| H | -8.41798100 | 0.13560800  | 0.00793000  |
| C | -6.25018900 | 0.22002700  | 0.21737900  |
| H | -6.17680200 | 1.23315800  | -0.19264500 |
| H | -6.28317800 | 0.32967000  | 1.30698200  |
| C | -4.99950100 | -0.56598700 | -0.16995100 |
| H | -4.96666900 | -0.67700300 | -1.26066200 |
| H | -5.06833100 | -1.58090700 | 0.24074700  |
| C | -3.70773300 | 0.09090000  | 0.30826300  |
| H | -3.73496900 | 0.19267900  | 1.40052200  |
| H | -3.64220100 | 1.10598800  | -0.10073400 |
| C | -2.45437800 | -0.68157000 | -0.09640100 |
| H | -2.42084800 | -0.77739200 | -1.18767600 |
| H | -2.50592200 | -1.70288300 | 0.30432700  |
| C | -1.17157400 | -0.02736400 | 0.38632700  |
| H | -1.17941000 | 0.10383700  | 1.47491100  |
| H | -1.15626400 | 1.03826700  | -0.04766900 |
| C | 0.11595700  | -0.68856800 | -0.07525200 |
| H | 0.10358900  | -0.77321000 | -1.16797500 |
| H | 0.15011300  | -1.71450400 | 0.31559800  |
| C | 1.36549800  | 0.07172000  | 0.36285200  |
| H | 1.38156000  | 0.14369700  | 1.45744300  |
| H | 1.30326900  | 1.09818800  | -0.01613900 |
| C | 2.66075600  | -0.57497900 | -0.12037700 |
| H | 2.63513700  | -0.66143300 | -1.21342000 |
| H | 2.72708300  | -1.59865600 | 0.26829600  |
| C | 3.90676000  | 0.20482700  | 0.29265800  |
| H | 3.93446200  | 0.29324600  | 1.38569200  |
| H | 3.83622600  | 1.22762900  | -0.09677300 |
| C | 5.20508500  | -0.43212200 | -0.19534100 |
| H | 5.17289400  | -0.53069000 | -1.28744900 |
| H | 5.28326100  | -1.45148400 | 0.20254600  |
| C | 6.44949800  | 0.35955600  | 0.20078700  |
| H | 6.48061100  | 0.45900700  | 1.29136600  |
| H | 6.36925100  | 1.37628600  | -0.19903400 |
| C | 7.74002600  | -0.28795900 | -0.29442700 |
| H | 7.73692500  | -0.37677600 | -1.38403100 |
| H | 8.61841100  | 0.29411400  | -0.00830100 |
| H | 7.85460700  | -1.29336400 | 0.11941300  |

|   |             |            |             |
|---|-------------|------------|-------------|
| O | -1.16869200 | 2.47076000 | -0.50082600 |
| H | -1.46321200 | 2.84694800 | 0.34446200  |

**OH-R49: OH + CH<sub>3</sub>(CH<sub>2</sub>)<sub>11</sub>CH<sub>3</sub> → H<sub>2</sub>O + CH<sub>3</sub>(CH<sub>2</sub>)<sub>5</sub>CH(CH<sub>2</sub>)<sub>5</sub>CH<sub>3</sub>**  
**CH<sub>3</sub>(CH<sub>2</sub>)<sub>5</sub>CH(CH<sub>2</sub>)<sub>5</sub>CH<sub>3</sub>**

|   |             |             |             |
|---|-------------|-------------|-------------|
| C | -7.56169900 | -0.68458600 | 0.17776100  |
| H | -7.47352600 | -1.47180800 | 0.93108700  |
| H | -7.62424400 | -1.16817000 | -0.80063200 |
| H | -8.50198400 | -0.15783100 | 0.35194000  |
| C | -6.36564200 | 0.26218800  | 0.23966600  |
| H | -6.48556100 | 1.05796400  | -0.50346000 |
| H | -6.33533200 | 0.75545700  | 1.21723600  |
| C | -5.03808500 | -0.45288500 | -0.00199100 |
| H | -5.06719300 | -0.94768900 | -0.98052800 |
| H | -4.91656300 | -1.25020300 | 0.74137100  |
| C | -3.83164700 | 0.48069700  | 0.05629100  |
| H | -3.80274700 | 0.97413800  | 1.03542100  |
| H | -3.95447000 | 1.27834200  | -0.68651600 |
| C | -2.50677200 | -0.23675700 | -0.18708900 |
| H | -2.53315500 | -0.72646500 | -1.16771400 |
| H | -2.37929600 | -1.03402400 | 0.55381600  |
| C | -1.29843700 | 0.69781900  | -0.12751600 |
| H | -1.26644900 | 1.19610800  | 0.85122400  |
| H | -1.44225500 | 1.51157400  | -0.85910200 |
| C | 0.00000000  | 0.00959500  | -0.37771400 |
| H | 0.00000000  | -0.89006400 | -0.98748400 |
| C | 1.29843700  | 0.69781800  | -0.12751400 |
| H | 1.26644900  | 1.19610500  | 0.85122700  |
| H | 1.44225400  | 1.51157500  | -0.85909800 |
| C | 2.50677200  | -0.23675700 | -0.18708900 |
| H | 2.53315500  | -0.72646300 | -1.16771600 |
| H | 2.37929600  | -1.03402600 | 0.55381400  |
| C | 3.83164700  | 0.48069700  | 0.05629400  |
| H | 3.80274700  | 0.97413500  | 1.03542400  |
| H | 3.95447000  | 1.27834300  | -0.68651200 |
| C | 5.03808500  | -0.45288500 | -0.00199000 |
| H | 5.06719300  | -0.94768800 | -0.98052800 |
| H | 4.91656300  | -1.25020400 | 0.74137100  |
| C | 6.36564200  | 0.26218800  | 0.23966600  |
| H | 6.33533300  | 0.75545600  | 1.21723800  |
| H | 6.48556000  | 1.05796500  | -0.50345800 |
| C | 7.56169900  | -0.68458500 | 0.17775900  |
| H | 7.62424300  | -1.16816800 | -0.80063400 |

|   |            |             |            |
|---|------------|-------------|------------|
| H | 8.50198500 | -0.15783000 | 0.35193700 |
| H | 7.47352800 | -1.47180800 | 0.93108500 |

**TS49: OH + CH<sub>3</sub>(CH<sub>2</sub>)<sub>11</sub>CH<sub>3</sub> → H<sub>2</sub>O + CH<sub>3</sub>(CH<sub>2</sub>)<sub>5</sub>CH(CH<sub>2</sub>)<sub>5</sub>CH<sub>3</sub>**

|   |             |             |             |
|---|-------------|-------------|-------------|
| C | -7.62682000 | 0.22676500  | 0.23891400  |
| H | -7.61748100 | 1.27291900  | -0.07794100 |
| H | -7.67385800 | 0.21197100  | 1.33099000  |
| H | -8.54192300 | -0.23073900 | -0.14217400 |
| C | -6.38204900 | -0.50248700 | -0.26064200 |
| H | -6.42229600 | -1.55367000 | 0.04497500  |
| H | -6.36744900 | -0.50029200 | -1.35588500 |
| C | -5.08850400 | 0.12148800  | 0.25836800  |
| H | -5.10332300 | 0.12387700  | 1.35524200  |
| H | -5.04462300 | 1.17293500  | -0.05037500 |
| C | -3.83432900 | -0.59984700 | -0.22867200 |
| H | -3.82361100 | -0.60652900 | -1.32523500 |
| H | -3.87535300 | -1.65006200 | 0.08549000  |
| C | -2.54318200 | 0.03392400  | 0.28286300  |
| H | -2.55621600 | 0.04878300  | 1.37963600  |
| H | -2.49107400 | 1.07900900  | -0.04272500 |
| C | -1.28963800 | -0.69447800 | -0.19583300 |
| H | -1.28117800 | -0.72994100 | -1.29122200 |
| H | -1.31405600 | -1.73712700 | 0.14868800  |
| C | -0.00460000 | -0.04618600 | 0.29065900  |
| H | -0.00624200 | 0.06149100  | 1.38181400  |
| H | -0.01433300 | 1.02812500  | -0.12067200 |
| C | 1.27964800  | -0.69725100 | -0.19264200 |
| H | 1.25989900  | -0.76678700 | -1.28609200 |
| H | 1.31704900  | -1.72808300 | 0.18438300  |
| C | 2.53405800  | 0.05300100  | 0.24854900  |
| H | 2.53720400  | 0.14248600  | 1.34211200  |
| H | 2.49437500  | 1.07315400  | -0.15085000 |
| C | 3.82690300  | -0.62020000 | -0.20521000 |
| H | 3.82165900  | -0.71343600 | -1.29779100 |
| H | 3.86305500  | -1.64217600 | 0.19128900  |
| C | 5.08001000  | 0.13471800  | 0.23087000  |
| H | 5.08404100  | 0.23185500  | 1.32357000  |
| H | 5.04559800  | 1.15572900  | -0.16834200 |
| C | 6.37520400  | -0.53785500 | -0.21875400 |
| H | 6.36933300  | -0.63502700 | -1.30974700 |
| H | 6.40849200  | -1.55700000 | 0.18139400  |
| C | 7.61870900  | 0.22969700  | 0.22308600  |
| H | 7.65591700  | 0.31556500  | 1.31225500  |

|   |            |             |             |
|---|------------|-------------|-------------|
| H | 8.53496900 | -0.26461300 | -0.10553000 |
| H | 7.61730900 | 1.24210900  | -0.18917700 |
| O | 0.01054700 | 2.46577200  | -0.55638400 |
| H | 0.36726400 | 2.82156400  | 0.27365400  |

### 3.1.14 C14 (*n*-C<sub>14</sub>H<sub>30</sub>)

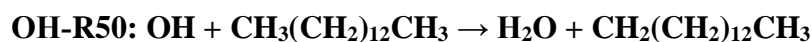

*n*-C<sub>14</sub>H<sub>30</sub>

|   |             |             |             |
|---|-------------|-------------|-------------|
| C | -8.28000900 | 0.33049400  | -0.00019300 |
| H | -8.31930700 | 0.97459800  | -0.88268400 |
| H | -8.31937600 | 0.97478700  | 0.88215700  |
| H | -9.17574000 | -0.29383300 | -0.00016100 |
| C | -7.00584500 | -0.51071000 | -0.00005500 |
| H | -6.99648200 | -1.16706300 | 0.87695200  |
| H | -6.99640400 | -1.16723500 | -0.87693300 |
| C | -5.73997500 | 0.34356200  | -0.00008100 |
| H | -5.74860200 | 1.00189700  | 0.87735900  |
| H | -5.74853200 | 1.00174200  | -0.87763800 |
| C | -4.45524000 | -0.48110800 | 0.00004200  |
| H | -4.44698800 | -1.13903000 | -0.87753500 |
| H | -4.44707000 | -1.13890000 | 0.87771700  |
| C | -3.19171800 | 0.37613800  | 0.00003800  |
| H | -3.20043600 | 1.03410500  | 0.87755500  |
| H | -3.20038500 | 1.03402000  | -0.87754300 |
| C | -1.90584000 | -0.44708100 | 0.00011200  |
| H | -1.89686500 | -1.10497600 | -0.87746100 |
| H | -1.89692200 | -1.10491300 | 0.87773200  |
| C | -0.64313000 | 0.41130700  | 0.00012200  |
| H | -0.65223700 | 1.06919600  | 0.87770100  |
| H | -0.65222100 | 1.06919100  | -0.87746100 |
| C | 0.64313000  | -0.41130700 | 0.00013300  |
| H | 0.65223500  | -1.06919000 | -0.87745100 |
| H | 0.65222200  | -1.06919700 | 0.87771100  |
| C | 1.90584000  | 0.44708100  | 0.00014400  |
| H | 1.89691100  | 1.10491000  | 0.87776700  |
| H | 1.89687600  | 1.10498000  | -0.87742600 |
| C | 3.19171800  | -0.37613800 | 0.00008100  |
| H | 3.20038500  | -1.03403000 | -0.87749100 |
| H | 3.20043500  | -1.03409400 | 0.87760600  |
| C | 4.45524000  | 0.48110800  | 0.00007400  |
| H | 4.44707500  | 1.13890600  | 0.87774500  |
| H | 4.44698300  | 1.13902300  | -0.87750800 |
| C | 5.73997500  | -0.34356200 | -0.00005100 |



|   |            |             |             |
|---|------------|-------------|-------------|
| H | 5.74851500 | -1.00176500 | -0.87759100 |
| H | 5.74862000 | -1.00187400 | 0.87740600  |
| C | 7.00584500 | 0.51071000  | -0.00007600 |
| H | 6.99650600 | 1.16708200  | 0.87691700  |
| H | 6.99638000 | 1.16721500  | -0.87696800 |
| C | 8.28000900 | -0.33049400 | -0.00023200 |
| H | 8.31927600 | -0.97462700 | -0.88270300 |
| H | 9.17574000 | 0.29383300  | -0.00025300 |
| H | 8.31940700 | -0.97475800 | 0.88213800  |

**CH<sub>2</sub>(CH<sub>2</sub>)<sub>12</sub>CH<sub>3</sub>**

|   |             |             |             |
|---|-------------|-------------|-------------|
| C | -8.33207500 | 0.30919200  | -0.01747500 |
| H | -8.36511400 | 1.27731900  | 0.46731900  |
| H | -9.26472800 | -0.11302000 | -0.36669400 |
| C | -7.07924600 | -0.49491600 | 0.00068000  |
| H | -7.05239000 | -1.13513700 | 0.89790500  |
| H | -7.06689400 | -1.18675000 | -0.84944800 |
| C | -5.81301900 | 0.36469400  | -0.01818700 |
| H | -5.83068100 | 1.04682400  | 0.84011600  |
| H | -5.82098800 | 0.99436800  | -0.91487900 |
| C | -4.53047100 | -0.46179300 | 0.01532200  |
| H | -4.51867400 | -1.14665900 | -0.84133500 |
| H | -4.52703300 | -1.09181300 | 0.91320800  |
| C | -3.26622600 | 0.39393800  | -0.00661000 |
| H | -3.27469300 | 1.07513000  | 0.85291700  |
| H | -3.27337300 | 1.02783100  | -0.90157400 |
| C | -1.98202900 | -0.43156800 | 0.01621900  |
| H | -1.97403100 | -1.11206500 | -0.84391500 |
| H | -1.97479800 | -1.06635600 | 0.91065100  |
| C | -0.71748600 | 0.42375500  | -0.00603900 |
| H | -0.72389400 | 1.10258800  | 0.85541500  |
| H | -0.72612200 | 1.06027700  | -0.89922000 |
| C | 0.56651500  | -0.40214400 | 0.01215600  |
| H | 0.57261800  | -1.08079800 | -0.84946200 |
| H | 0.57500400  | -1.03897100 | 0.90514100  |
| C | 1.83166700  | 0.45228500  | -0.01024200 |
| H | 1.82612600  | 1.13057700  | 0.85165600  |
| H | 1.82321200  | 1.08940200  | -0.90301000 |
| C | 3.11494800  | -0.37476200 | 0.00716200  |
| H | 3.12045400  | -1.05280900 | -0.85493100 |
| H | 3.12275900  | -1.01230300 | 0.89964000  |
| C | 4.38115800  | 0.47819300  | -0.01429800 |
| H | 4.37551100  | 1.15682000  | 0.84735800  |

|   |            |             |             |
|---|------------|-------------|-------------|
| H | 4.37449900 | 1.11498500  | -0.90733400 |
| C | 5.66323600 | -0.35034700 | 0.00507300  |
| H | 5.66989700 | -1.02897700 | -0.85675700 |
| H | 5.66969400 | -0.98795300 | 0.89770700  |
| C | 6.93176200 | 0.49972200  | -0.01464200 |
| H | 6.92309700 | 1.17781300  | 0.84563400  |
| H | 6.92555900 | 1.13420200  | -0.90763300 |
| C | 8.20333500 | -0.34503800 | 0.00866500  |
| H | 8.24305600 | -1.01057000 | -0.85770200 |
| H | 9.10090200 | 0.27650000  | -0.00405700 |
| H | 8.23860900 | -0.96772900 | 0.90657100  |

**TS50: OH + CH<sub>3</sub>(CH<sub>2</sub>)<sub>12</sub>CH<sub>3</sub> → H<sub>2</sub>O + CH<sub>2</sub>(CH<sub>2</sub>)<sub>12</sub>CH<sub>3</sub>**

|   |             |             |             |
|---|-------------|-------------|-------------|
| C | 7.50627700  | 0.67418600  | -0.00726800 |
| H | 7.62372100  | 1.23416100  | 0.92244100  |
| H | 7.55946300  | 1.35216500  | -0.86191700 |
| H | 8.46668100  | 0.01915000  | -0.11394600 |
| C | 6.27169800  | -0.20582200 | -0.02630300 |
| H | 6.28005900  | -0.83095300 | -0.92475700 |
| H | 6.28539800  | -0.88789900 | 0.83120300  |
| C | 4.97889500  | 0.61356100  | 0.00891000  |
| H | 4.95955500  | 1.29104700  | -0.85280700 |
| H | 4.97530600  | 1.24906000  | 0.90241100  |
| C | 3.72358400  | -0.25587400 | -0.00168400 |
| H | 3.73982700  | -0.92775600 | 0.86494900  |
| H | 3.73519700  | -0.89805800 | -0.89048300 |
| C | 2.43321100  | 0.56021000  | 0.01541100  |
| H | 2.41798500  | 1.23068400  | -0.85235100 |
| H | 2.42344300  | 1.20482000  | 0.90270100  |
| C | 1.17527800  | -0.30509900 | 0.00599600  |
| H | 1.18771400  | -0.97300300 | 0.87587100  |
| H | 1.18712000  | -0.95238800 | -0.87931800 |
| C | -0.11430800 | 0.51228800  | 0.01572300  |
| H | -0.12588700 | 1.18011100  | -0.85424200 |
| H | -0.12610200 | 1.15995300  | 0.90082700  |
| C | -1.37344900 | -0.35113700 | 0.00523500  |
| H | -1.36328400 | -1.01779200 | 0.87613300  |
| H | -1.36072100 | -0.99996100 | -0.87899700 |
| C | -2.66251000 | 0.46710800  | 0.01145000  |
| H | -2.67220200 | 1.13387000  | -0.85937400 |
| H | -2.67545200 | 1.11592900  | 0.89570500  |
| C | -3.92208600 | -0.39568500 | -0.00001100 |
| H | -3.91299600 | -1.06198000 | 0.87117600  |

|   |             |             |             |
|---|-------------|-------------|-------------|
| H | -3.90867700 | -1.04500000 | -0.88388100 |
| C | -5.21117400 | 0.42259500  | 0.00460500  |
| H | -5.22019100 | 1.08900300  | -0.86652400 |
| H | -5.22495000 | 1.07178700  | 0.88859800  |
| C | -6.47050400 | -0.44023300 | -0.00752400 |
| H | -6.46236800 | -1.10696100 | 0.86354300  |
| H | -6.45731600 | -1.08982100 | -0.89140100 |
| C | -7.76099900 | 0.37636100  | -0.00333400 |
| H | -7.76772600 | 1.04163300  | -0.87361200 |
| H | -7.77322400 | 1.02397700  | 0.88012600  |
| C | -9.01014800 | -0.50138300 | -0.01636400 |
| H | -9.03415900 | -1.15521600 | 0.85945500  |
| H | -9.92332300 | 0.09709700  | -0.01347100 |
| H | -9.02819100 | -1.13745100 | -0.90534100 |
| O | 9.46216400  | -0.99487000 | -0.08096300 |
| H | 9.11538800  | -1.47771200 | 0.68593800  |

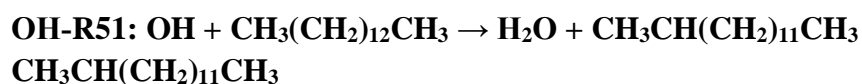

|   |             |             |             |
|---|-------------|-------------|-------------|
| C | 8.37170600  | -0.18480400 | 0.15696100  |
| H | 8.65869200  | -0.77734000 | -0.72480800 |
| H | 8.35968500  | -0.87912300 | 1.00423300  |
| H | 9.16250900  | 0.54726400  | 0.32724600  |
| C | 7.04226400  | 0.46240300  | -0.02441800 |
| H | 6.99457200  | 1.48446500  | -0.38508000 |
| C | 5.79949600  | -0.36044400 | -0.05599200 |
| H | 5.80866800  | -1.06800100 | 0.78514000  |
| H | 5.78790700  | -0.99239600 | -0.96088100 |
| C | 4.51483800  | 0.46651400  | -0.01501600 |
| H | 4.50761700  | 1.15998400  | -0.86428300 |
| H | 4.51560100  | 1.08461000  | 0.88995800  |
| C | 3.25128600  | -0.38876100 | -0.04858400 |
| H | 3.26031300  | -1.08204400 | 0.80131500  |
| H | 3.25665000  | -1.01010100 | -0.95250300 |
| C | 1.96751800  | 0.43678100  | -0.01147600 |
| H | 1.95644500  | 1.12750100  | -0.86337100 |
| H | 1.96398700  | 1.06082300  | 0.89044000  |
| C | 0.70272800  | -0.41803000 | -0.03864700 |
| H | 0.71340600  | -1.10760600 | 0.81420300  |
| H | 0.70690600  | -1.04338400 | -0.93973400 |
| C | -0.58122200 | 0.40736700  | -0.00331500 |
| H | -0.59262500 | 1.09606700  | -0.85686400 |
| H | -0.58459800 | 1.03371100  | 0.89707800  |

|   |             |             |             |
|---|-------------|-------------|-------------|
| C | -1.84614800 | -0.44732900 | -0.02800400 |
| H | -1.83445500 | -1.13619300 | 0.82541700  |
| H | -1.84318400 | -1.07348900 | -0.92853700 |
| C | -3.12992100 | 0.37830700  | 0.00836300  |
| H | -3.14208900 | 1.06680500  | -0.84533400 |
| H | -3.13220800 | 1.00493900  | 0.90856000  |
| C | -4.39528900 | -0.47586400 | -0.01462500 |
| H | -4.38224500 | -1.16551000 | 0.83816800  |
| H | -4.39439500 | -1.10122200 | -0.91573500 |
| C | -5.67841100 | 0.35027200  | 0.02519400  |
| H | -5.69254000 | 1.04035800  | -0.82740000 |
| H | -5.67945700 | 0.97591900  | 0.92627200  |
| C | -6.94555100 | -0.50182800 | 0.00339100  |
| H | -6.92871900 | -1.19212700 | 0.85378500  |
| H | -6.94514700 | -1.12356600 | -0.89854000 |
| C | -8.21855500 | 0.33976200  | 0.04909300  |
| H | -8.26669900 | 1.01792700  | -0.80697700 |
| H | -9.11492500 | -0.28347600 | 0.03437900  |
| H | -8.24810800 | 0.94912800  | 0.95629800  |

**TS51: OH + CH<sub>3</sub>(CH<sub>2</sub>)<sub>12</sub>CH<sub>3</sub> → H<sub>2</sub>O + CH<sub>3</sub>CH(CH<sub>2</sub>)<sub>11</sub>CH<sub>3</sub>**

|   |            |             |             |
|---|------------|-------------|-------------|
| C | 7.77502900 | -0.79390400 | -0.10009800 |
| H | 7.79715700 | -0.86753200 | -1.18969700 |
| H | 7.83320300 | -1.80887500 | 0.30590000  |
| H | 8.66384200 | -0.24929400 | 0.22205000  |
| C | 6.50231800 | -0.10982100 | 0.36692500  |
| H | 6.49919500 | 0.03203800  | 1.45273000  |
| H | 6.51529300 | 0.95337100  | -0.07615900 |
| C | 5.21709500 | -0.77289700 | -0.09778100 |
| H | 5.17796400 | -1.79141100 | 0.31199900  |
| H | 5.24035700 | -0.87864200 | -1.18847800 |
| C | 3.96143600 | -0.00899100 | 0.31438900  |
| H | 4.00032300 | 0.99545700  | -0.12324900 |
| H | 3.95655500 | 0.12090100  | 1.40403800  |
| C | 2.66953300 | -0.69836400 | -0.11651500 |
| H | 2.62876000 | -1.70325400 | 0.32116500  |
| H | 2.67936200 | -0.83620100 | -1.20436400 |
| C | 1.41667000 | 0.07756400  | 0.28245500  |
| H | 1.45953800 | 1.08203100  | -0.15597700 |
| H | 1.40743500 | 0.21700700  | 1.37043600  |
| C | 0.12211300 | -0.60637200 | -0.14942000 |
| H | 0.07640100 | -1.60982000 | 0.29120300  |
| H | 0.13310200 | -0.74855600 | -1.23686500 |

|   |             |             |             |
|---|-------------|-------------|-------------|
| C | -1.12901300 | 0.17517600  | 0.24422900  |
| H | -1.08086700 | 1.17914500  | -0.19496000 |
| H | -1.14103800 | 0.31629700  | 1.33190200  |
| C | -2.42508800 | -0.50388500 | -0.19080900 |
| H | -2.47561100 | -1.50707300 | 0.24991400  |
| H | -2.41206100 | -0.64658400 | -1.27821200 |
| C | -3.67445000 | 0.28214200  | 0.19962500  |
| H | -3.62171600 | 1.28601500  | -0.23928300 |
| H | -3.68862400 | 0.42328100  | 1.28725200  |
| C | -4.97186900 | -0.39239700 | -0.23851200 |
| H | -5.02621200 | -1.39586200 | 0.20119400  |
| H | -4.95734800 | -0.53422000 | -1.32604300 |
| C | -6.21969400 | 0.39650900  | 0.15035000  |
| H | -6.16482500 | 1.40075700  | -0.28785500 |
| H | -6.23586400 | 0.53751800  | 1.23812700  |
| C | -7.51899900 | -0.27407800 | -0.28924400 |
| H | -7.57301200 | -1.27652600 | 0.14927800  |
| H | -7.50175800 | -0.41383900 | -1.37560000 |
| C | -8.75623600 | 0.52790700  | 0.10696300  |
| H | -8.73301800 | 1.52456500  | -0.34172400 |
| H | -9.67595600 | 0.03602800  | -0.21585000 |
| H | -8.80619200 | 0.65448600  | 1.19171700  |
| O | 6.40659800  | 2.37673600  | -0.50972600 |
| H | 5.95975700  | 2.70337400  | 0.28786800  |

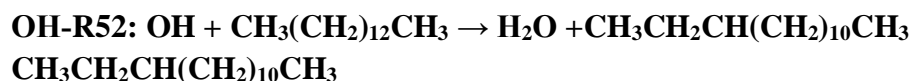

|   |             |             |             |
|---|-------------|-------------|-------------|
| C | -8.25844200 | 0.53975300  | 0.16339700  |
| H | -8.34281900 | 1.08870400  | -0.77774300 |
| H | -8.11319200 | 1.26901900  | 0.96362800  |
| H | -9.20504700 | 0.02565900  | 0.33888600  |
| C | -7.08914100 | -0.44162800 | 0.11039200  |
| H | -7.04252500 | -1.01958900 | 1.04305500  |
| H | -7.27514200 | -1.18861100 | -0.67850200 |
| C | -5.77490100 | 0.22273600  | -0.12396000 |
| H | -5.76389000 | 1.21557700  | -0.56608600 |
| C | -4.50433300 | -0.55586700 | -0.08752000 |
| H | -4.45263200 | -1.23349200 | -0.95720800 |
| H | -4.50437500 | -1.21707600 | 0.79015900  |
| C | -3.25042600 | 0.31844800  | -0.06960300 |
| H | -3.28372100 | 0.97519900  | 0.80706100  |
| H | -3.25763300 | 0.97384100  | -0.94861800 |
| C | -1.95704300 | -0.49153300 | -0.05295100 |

|   |             |             |             |
|---|-------------|-------------|-------------|
| H | -1.92935200 | -1.14824400 | -0.93113600 |
| H | -1.95270100 | -1.15023900 | 0.82407900  |
| C | -0.70354000 | 0.37990200  | -0.03508300 |
| H | -0.72945500 | 1.03498000  | 0.84417600  |
| H | -0.70879100 | 1.04008800  | -0.91093500 |
| C | 0.59027200  | -0.43067600 | -0.02238500 |
| H | 0.61493200  | -1.08632800 | -0.90136800 |
| H | 0.59561400  | -1.09062800 | 0.85366200  |
| C | 1.84521200  | 0.43879800  | -0.00647500 |
| H | 1.82226200  | 1.09322300  | 0.87342700  |
| H | 1.83920000  | 1.09981900  | -0.88170900 |
| C | 3.13776700  | -0.37383700 | 0.00279100  |
| H | 3.15933000  | -1.02901100 | -0.87661600 |
| H | 3.14398700  | -1.03440100 | 0.87837100  |
| C | 4.39445300  | 0.49323200  | 0.01637300  |
| H | 4.37461900  | 1.14737900  | 0.89658500  |
| H | 4.38794700  | 1.15460600  | -0.85861400 |
| C | 5.68530700  | -0.32180700 | 0.02270100  |
| H | 5.70460900  | -0.97707300 | -0.85688100 |
| H | 5.69277000  | -0.98294400 | 0.89804000  |
| C | 6.94486500  | 0.54162400  | 0.03405300  |
| H | 6.92545200  | 1.19456600  | 0.91344900  |
| H | 6.93613400  | 1.20138300  | -0.84039100 |
| C | 8.22500400  | -0.29044900 | 0.03862400  |
| H | 8.27380600  | -0.93151400 | -0.84561900 |
| H | 9.11628500  | 0.34016200  | 0.04556500  |
| H | 8.26400700  | -0.93723100 | 0.91916500  |

**TS52: OH + CH<sub>3</sub>(CH<sub>2</sub>)<sub>12</sub>CH<sub>3</sub> → H<sub>2</sub>O + CH<sub>3</sub>CH<sub>2</sub>CH(CH<sub>2</sub>)<sub>10</sub>CH<sub>3</sub>**

|   |             |             |             |
|---|-------------|-------------|-------------|
| C | -7.84597100 | -0.11511100 | 0.24456400  |
| H | -7.82696800 | 0.92454900  | -0.09092900 |
| H | -7.91499100 | -0.11552600 | 1.33568000  |
| H | -8.74869600 | -0.58577900 | -0.14883400 |
| C | -6.58737500 | -0.84299800 | -0.21982900 |
| H | -6.60575600 | -1.88522100 | 0.12241000  |
| H | -6.55636100 | -0.87537000 | -1.31361800 |
| C | -5.31656200 | -0.18386400 | 0.29005500  |
| H | -5.33756300 | -0.08096700 | 1.38165300  |
| H | -5.33571700 | 0.89258400  | -0.11521900 |
| C | -4.01713000 | -0.81592300 | -0.17633100 |
| H | -4.02524000 | -0.89354600 | -1.26947600 |
| H | -3.96430600 | -1.84326000 | 0.20853900  |
| C | -2.78067300 | -0.03945800 | 0.27040100  |

|   |             |             |             |
|---|-------------|-------------|-------------|
| H | -2.79151500 | 0.06309400  | 1.36285300  |
| H | -2.83448200 | 0.97529100  | -0.14141600 |
| C | -1.47084000 | -0.69344200 | -0.16105500 |
| H | -1.46568000 | -0.80711000 | -1.25176500 |
| H | -1.41520300 | -1.70692700 | 0.25467600  |
| C | -0.23801500 | 0.09742100  | 0.26973500  |
| H | -0.24598700 | 0.21653800  | 1.36014900  |
| H | -0.29359200 | 1.10901000  | -0.15050100 |
| C | 1.07465300  | -0.55458300 | -0.15674500 |
| H | 1.07923800  | -0.68022800 | -1.24628800 |
| H | 1.13467800  | -1.56364200 | 0.26910000  |
| C | 2.30567200  | 0.24474300  | 0.26368000  |
| H | 2.30159000  | 0.37106900  | 1.35323300  |
| H | 2.24391200  | 1.25358700  | -0.16245000 |
| C | 3.61961700  | -0.40375400 | -0.16429100 |
| H | 3.62086800  | -0.53500500 | -1.25320900 |
| H | 3.68548900  | -1.41044200 | 0.26629400  |
| C | 4.84908400  | 0.40254500  | 0.24752300  |
| H | 4.84933200  | 0.53284200  | 1.33661700  |
| H | 4.78105800  | 1.40961600  | -0.18192800 |
| C | 6.16372000  | -0.24177900 | -0.18390500 |
| H | 6.16214400  | -0.37612100 | -1.27261600 |
| H | 6.23585000  | -1.24733800 | 0.24874600  |
| C | 7.39311100  | 0.56890000  | 0.22056100  |
| H | 7.39473900  | 0.70117700  | 1.30800600  |
| H | 7.31844700  | 1.57286900  | -0.21150000 |
| C | 8.69947200  | -0.08589100 | -0.22053900 |
| H | 8.72628800  | -0.20635300 | -1.30678400 |
| H | 9.56727900  | 0.50867500  | 0.07204100  |
| H | 8.80738100  | -1.07840200 | 0.22509200  |
| O | -5.33499000 | 2.33127900  | -0.55022400 |
| H | -4.95890200 | 2.68927400  | 0.27029900  |

**OH-R53: OH + CH<sub>3</sub>(CH<sub>2</sub>)<sub>12</sub>CH<sub>3</sub> → H<sub>2</sub>O + CH<sub>3</sub>(CH<sub>2</sub>)<sub>2</sub>CH(CH<sub>2</sub>)<sub>9</sub>CH<sub>3</sub>**

|   |             |             |             |
|---|-------------|-------------|-------------|
| C | -8.31038000 | -0.01179300 | 0.31142500  |
| H | -8.56396400 | 0.62820500  | -0.53790500 |
| H | -8.31368900 | 0.61172700  | 1.20945700  |
| H | -9.10173200 | -0.75626600 | 0.41819900  |
| C | -6.94743600 | -0.66785700 | 0.11094400  |
| H | -6.72172300 | -1.32788500 | 0.95441900  |
| H | -6.96782100 | -1.30100800 | -0.78240600 |
| C | -5.81908600 | 0.35454400  | -0.03212000 |

|   |             |             |             |
|---|-------------|-------------|-------------|
| H | -5.79314400 | 0.99891400  | 0.85765000  |
| H | -6.05932500 | 1.03172500  | -0.87009600 |
| C | -4.47929900 | -0.26444600 | -0.23961100 |
| H | -4.42938400 | -1.24466400 | -0.70703500 |
| C | -3.22933900 | 0.54320500  | -0.15230600 |
| H | -3.26038000 | 1.17361200  | 0.74718800  |
| H | -3.17628400 | 1.25132300  | -0.99724900 |
| C | -1.95765200 | -0.30520000 | -0.14003300 |
| H | -1.93692400 | -0.93125700 | -1.04002500 |
| H | -1.99410300 | -0.99160000 | 0.71352700  |
| C | -0.67959000 | 0.52601400  | -0.07324800 |
| H | -0.70017800 | 1.15461300  | 0.82537100  |
| H | -0.64779700 | 1.21220900  | -0.92841300 |
| C | 0.58643800  | -0.32736500 | -0.06367000 |
| H | 0.60208900  | -0.96029400 | -0.95934000 |
| H | 0.55665700  | -1.00994000 | 0.79429400  |
| C | 1.86998600  | 0.49740900  | -0.00747000 |
| H | 1.85716300  | 1.12932800  | 0.88891900  |
| H | 1.89921700  | 1.18055600  | -0.86507900 |
| C | 3.13293000  | -0.36062000 | -0.00279600 |
| H | 3.14134900  | -0.99632100 | -0.89659800 |
| H | 3.10601700  | -1.04054800 | 0.85742400  |
| C | 4.41949800  | 0.46016300  | 0.04340100  |
| H | 4.41374600  | 1.09457900  | 0.93812900  |
| H | 4.44549700  | 1.14098700  | -0.81618100 |
| C | 5.68022700  | -0.40079400 | 0.04286700  |
| H | 5.68330500  | -1.03868000 | -0.84959900 |
| H | 5.65735800  | -1.07915500 | 0.90465000  |
| C | 6.96965100  | 0.41651000  | 0.08049500  |
| H | 6.96678200  | 1.05201400  | 0.97279000  |
| H | 6.99047800  | 1.09365400  | -0.78034900 |
| C | 8.21948500  | -0.46039000 | 0.07614800  |
| H | 8.25047100  | -1.08675300 | -0.81936400 |
| H | 9.13222000  | 0.13837800  | 0.09844900  |
| H | 8.23150200  | -1.12373200 | 0.94501200  |

**TS53: OH + CH<sub>3</sub>(CH<sub>2</sub>)<sub>12</sub>CH<sub>3</sub> → H<sub>2</sub>O + CH<sub>3</sub>(CH<sub>2</sub>)<sub>2</sub>CH(CH<sub>2</sub>)<sub>9</sub>CH<sub>3</sub>**

|   |             |             |             |
|---|-------------|-------------|-------------|
| C | -7.95917800 | -0.54118200 | -0.20649900 |
| H | -8.07045600 | -1.55498800 | 0.18742200  |
| H | -7.95920600 | -0.60661300 | -1.29763000 |
| H | -8.83778200 | 0.03319000  | 0.09355000  |
| C | -6.67050800 | 0.10293200  | 0.29704100  |
| H | -6.58759300 | 1.12542000  | -0.08479100 |



|   |             |             |             |
|---|-------------|-------------|-------------|
| H | -6.69679200 | 0.17796700  | 1.38988500  |
| C | -5.42581700 | -0.67677400 | -0.12166900 |
| H | -5.39824300 | -0.76132000 | -1.21428700 |
| H | -5.48525700 | -1.70244500 | 0.26743100  |
| C | -4.13434000 | -0.03990600 | 0.36169400  |
| H | -4.14357100 | 0.09312200  | 1.45006500  |
| H | -4.12039200 | 1.02517600  | -0.07393800 |
| C | -2.85648800 | -0.72133200 | -0.09609300 |
| H | -2.87055300 | -0.81658600 | -1.18779700 |
| H | -2.83532200 | -1.74347600 | 0.30517600  |
| C | -1.59523200 | 0.02388300  | 0.33375700  |
| H | -1.58825500 | 0.12651500  | 1.42619200  |
| H | -1.63008800 | 1.03966700  | -0.07724000 |
| C | -0.30810700 | -0.66131800 | -0.11723800 |
| H | -0.32259300 | -0.77415200 | -1.20797800 |
| H | -0.26943500 | -1.67613300 | 0.29714200  |
| C | 0.94912700  | 0.10125300  | 0.29348900  |
| H | 0.96643100  | 0.21221400  | 1.38466800  |
| H | 0.90462200  | 1.11689200  | -0.11812400 |
| C | 2.23956600  | -0.57219400 | -0.16619800 |
| H | 2.21868100  | -0.68784100 | -1.25669500 |
| H | 2.28937900  | -1.58603300 | 0.24941200  |
| C | 3.49404900  | 0.20033800  | 0.23449200  |
| H | 3.51862200  | 0.31182100  | 1.32542500  |
| H | 3.43909900  | 1.21578200  | -0.17654800 |
| C | 4.78618800  | -0.46342400 | -0.23455800 |
| H | 4.75980800  | -0.57685300 | -1.32523600 |
| H | 4.84474800  | -1.47793200 | 0.17835000  |
| C | 6.03835100  | 0.31523300  | 0.16091100  |
| H | 6.06884700  | 0.42454100  | 1.25207900  |
| H | 5.97669200  | 1.33167300  | -0.24717500 |
| C | 7.33244800  | -0.33995100 | -0.31569100 |
| H | 7.30092400  | -0.44662400 | -1.40551700 |
| H | 7.39334700  | -1.35510700 | 0.09149500  |
| C | 8.57373300  | 0.45171200  | 0.08845000  |
| H | 8.63984200  | 0.54229400  | 1.17599700  |
| H | 9.48968500  | -0.02638500 | -0.26437400 |
| H | 8.54141700  | 1.46264000  | -0.32644000 |
| O | -4.06945500 | 2.45675500  | -0.52523900 |
| H | -3.76371600 | 2.82391400  | 0.32007400  |

**OH-R54:**  $\text{OH} + \text{CH}_3(\text{CH}_2)_{12}\text{CH}_3 \rightarrow \text{H}_2\text{O} + \text{CH}_3(\text{CH}_2)_3\text{CH}(\text{CH}_2)_8\text{CH}_3$   
 $\text{CH}_3(\text{CH}_2)_3\text{CH}(\text{CH}_2)_8\text{CH}_3$

|   |             |             |             |
|---|-------------|-------------|-------------|
| C | 8.19096700  | 0.69812500  | 0.33667200  |
| H | 8.02861700  | 1.42761000  | 1.13438100  |
| H | 8.28822800  | 1.24987100  | -0.60198800 |
| H | 9.14069900  | 0.19564200  | 0.53002100  |
| C | 7.03321000  | -0.29441400 | 0.26532300  |
| H | 7.22732300  | -1.03270500 | -0.52033500 |
| H | 6.96812500  | -0.85376600 | 1.20492500  |
| C | 5.69446900  | 0.38697700  | -0.00613600 |
| H | 5.75460200  | 0.94183600  | -0.95006000 |
| H | 5.49544000  | 1.12835700  | 0.77607800  |
| C | 4.52375900  | -0.59385900 | -0.07465000 |
| H | 4.45807600  | -1.15462700 | 0.86768500  |
| H | 4.74158900  | -1.35235200 | -0.84629200 |
| C | 3.21422700  | 0.06085900  | -0.35539300 |
| H | 3.20959200  | 0.97798700  | -0.93859300 |
| C | 1.92923000  | -0.67363300 | -0.17727400 |
| H | 1.93852200  | -1.19822500 | 0.78810100  |
| H | 1.83955900  | -1.47025900 | -0.93580000 |
| C | 0.69540400  | 0.22530700  | -0.25931300 |
| H | 0.68754400  | 0.73604100  | -1.22947200 |
| H | 0.77290100  | 1.00901700  | 0.50268800  |
| C | -0.61408300 | -0.53705400 | -0.07725600 |
| H | -0.60353300 | -1.04932700 | 0.89250900  |
| H | -0.68643700 | -1.32264300 | -0.83925500 |
| C | -1.84635600 | 0.36064000  | -0.15940500 |
| H | -1.85955800 | 0.86969200  | -1.13076900 |
| H | -1.77147000 | 1.14875800  | 0.59954600  |
| C | -3.15705600 | -0.39916200 | 0.03007300  |
| H | -3.14441400 | -0.90622700 | 1.00249100  |
| H | -3.23122000 | -1.18893300 | -0.72731400 |
| C | -4.38945500 | 0.49823900  | -0.05464100 |
| H | -4.40357300 | 1.00330000  | -1.02811100 |
| H | -4.31392100 | 1.28962400  | 0.70094600  |
| C | -5.70003100 | -0.26034200 | 0.13899400  |
| H | -5.68727700 | -0.76450600 | 1.11310400  |
| H | -5.77605300 | -1.05289400 | -0.61553100 |
| C | -6.93352700 | 0.63590900  | 0.05287200  |
| H | -6.94570900 | 1.13755900  | -0.92081900 |
| H | -6.85582900 | 1.42728400  | 0.80623100  |
| C | -8.23538100 | -0.13677000 | 0.25021700  |
| H | -8.25372700 | -0.62351400 | 1.22886700  |
| H | -9.10646900 | 0.51817200  | 0.18531200  |
| H | -8.34390100 | -0.91571600 | -0.50904500 |

**TS54: OH + CH<sub>3</sub>(CH<sub>2</sub>)<sub>12</sub>CH<sub>3</sub> → H<sub>2</sub>O + CH<sub>3</sub>(CH<sub>2</sub>)<sub>3</sub>CH(CH<sub>2</sub>)<sub>8</sub>CH<sub>3</sub>**

|   |             |             |             |
|---|-------------|-------------|-------------|
| C | -8.02992700 | 0.08831200  | 0.15796700  |
| H | -8.00267100 | 1.12988200  | -0.17267700 |
| H | -8.11307600 | 0.08844000  | 1.24806300  |
| H | -8.93493400 | -0.36871100 | -0.24701400 |
| C | -6.77423600 | -0.65453300 | -0.29110200 |
| H | -6.82713800 | -1.69986400 | 0.03294100  |
| H | -6.72769200 | -0.67201900 | -1.38527700 |
| C | -5.49583200 | -0.02103500 | 0.25216200  |
| H | -5.54135600 | 0.00377900  | 1.34813800  |
| H | -5.43273200 | 1.02137000  | -0.08100400 |
| C | -4.23057400 | -0.75509600 | -0.18452500 |
| H | -4.19520800 | -0.80538700 | -1.27892300 |
| H | -4.26292200 | -1.79307900 | 0.17339500  |
| C | -2.95867900 | -0.09755100 | 0.32325700  |
| H | -2.98266700 | 0.01964300  | 1.41323100  |
| H | -2.96492200 | 0.97322800  | -0.09740700 |
| C | -1.66116700 | -0.74381500 | -0.12982900 |
| H | -1.66515400 | -0.83274100 | -1.22214300 |
| H | -1.61693800 | -1.76746900 | 0.26574900  |
| C | -0.42192800 | 0.03005600  | 0.31350900  |
| H | -0.42951400 | 0.13350700  | 1.40587800  |
| H | -0.47530000 | 1.04454500  | -0.09878000 |
| C | 0.88527100  | -0.62636000 | -0.12216500 |
| H | 0.88352200  | -0.74539300 | -1.21233000 |
| H | 0.94432300  | -1.63775300 | 0.29821500  |
| C | 2.12036200  | 0.16793700  | 0.29574300  |
| H | 2.12230400  | 0.28962700  | 1.38589900  |
| H | 2.05830100  | 1.17839100  | -0.12629700 |
| C | 3.43048900  | -0.48158800 | -0.14208800 |
| H | 3.42397500  | -0.61095500 | -1.23118600 |
| H | 3.49841600  | -1.48898400 | 0.28650100  |
| C | 4.66342400  | 0.32325300  | 0.26215200  |
| H | 4.67174400  | 0.45196700  | 1.35142400  |
| H | 4.59276400  | 1.33092300  | -0.16542700 |
| C | 5.97448000  | -0.32102400 | -0.18003800 |
| H | 5.96410900  | -0.45491800 | -1.26875600 |
| H | 6.05014500  | -1.32672900 | 0.25166200  |
| C | 7.20702800  | 0.48968200  | 0.21467800  |
| H | 7.21742500  | 0.62175900  | 1.30211000  |
| H | 7.12872600  | 1.49369900  | -0.21661600 |
| C | 8.50983500  | -0.16483100 | -0.23718300 |

|   |             |             |             |
|---|-------------|-------------|-------------|
| H | 8.52807900  | -0.28459300 | -1.32366700 |
| H | 9.37990700  | 0.42954300  | 0.04898200  |
| H | 8.62121000  | -1.15762100 | 0.20697900  |
| O | -2.94682200 | 2.40693100  | -0.54806500 |
| H | -2.64942600 | 2.78001900  | 0.29761400  |

**OH-R55: OH + CH<sub>3</sub>(CH<sub>2</sub>)<sub>12</sub>CH<sub>3</sub> → H<sub>2</sub>O + CH<sub>3</sub>(CH<sub>2</sub>)<sub>4</sub>CH(CH<sub>2</sub>)<sub>7</sub>CH<sub>3</sub>**  
**CH<sub>3</sub>(CH<sub>2</sub>)<sub>4</sub>CH(CH<sub>2</sub>)<sub>7</sub>CH<sub>3</sub>**

|   |             |             |             |
|---|-------------|-------------|-------------|
| C | -8.29126700 | 0.03148900  | 0.24047700  |
| H | -8.44452500 | 0.77331800  | -0.54780000 |
| H | -8.32356900 | 0.55607800  | 1.19903000  |
| H | -9.13067300 | -0.66602300 | 0.21201400  |
| C | -6.95612400 | -0.68565000 | 0.05833600  |
| H | -6.83025200 | -1.43887000 | 0.84368500  |
| H | -6.95570900 | -1.22962000 | -0.89250100 |
| C | -5.76708300 | 0.27195500  | 0.08735600  |
| H | -5.76754700 | 0.82005700  | 1.03760200  |
| H | -5.89091000 | 1.02506300  | -0.70071000 |
| C | -4.42503600 | -0.43168700 | -0.09048300 |
| H | -4.42648800 | -0.98381900 | -1.03778900 |
| H | -4.29362900 | -1.17737200 | 0.70192400  |
| C | -3.23707400 | 0.52918200  | -0.07456800 |
| H | -3.23789700 | 1.09965800  | 0.86542700  |
| H | -3.37857000 | 1.28567800  | -0.86537200 |
| C | -1.91909700 | -0.14572800 | -0.24623300 |
| H | -1.89443600 | -1.13902200 | -0.68645000 |
| C | -0.64532500 | 0.62198100  | -0.14576900 |
| H | -0.66990500 | 1.26093100  | 0.74816800  |
| H | -0.56051200 | 1.32195200  | -0.99496100 |
| C | 0.60146400  | -0.26151300 | -0.10930700 |
| H | 0.61258600  | -0.90155800 | -0.99955700 |
| H | 0.54045500  | -0.93334000 | 0.75440700  |
| C | 1.89979100  | 0.53803600  | -0.04584000 |
| H | 1.88775900  | 1.18191700  | 0.84206200  |
| H | 1.95374500  | 1.20932000  | -0.91175000 |
| C | 3.14598100  | -0.34332700 | -0.01320100 |
| H | 3.15183400  | -0.99416000 | -0.89603500 |
| H | 3.09864600  | -1.00764000 | 0.85821200  |
| C | 4.44589600  | 0.45633800  | 0.03148300  |
| H | 4.44195000  | 1.10651900  | 0.91482700  |
| H | 4.49089400  | 1.12149100  | -0.83957800 |
| C | 5.69272000  | -0.42404600 | 0.05828500  |
| H | 5.69321700  | -1.07913500 | -0.82161400 |

|   |            |             |             |
|---|------------|-------------|-------------|
| H | 5.65297400 | -1.08497800 | 0.93292500  |
| C | 6.99384900 | 0.37483100  | 0.09036500  |
| H | 6.99272800 | 1.02857700  | 0.96938100  |
| H | 7.03142400 | 1.03381900  | -0.78395600 |
| C | 8.23089800 | -0.51955000 | 0.11496400  |
| H | 8.26033100 | -1.16508600 | -0.76684900 |
| H | 9.15174600 | 0.06681700  | 0.13233600  |
| H | 8.22676500 | -1.16443700 | 0.99772400  |

**TS55: OH + CH<sub>3</sub>(CH<sub>2</sub>)<sub>12</sub>CH<sub>3</sub> → H<sub>2</sub>O + CH<sub>3</sub>(CH<sub>2</sub>)<sub>4</sub>CH(CH<sub>2</sub>)<sub>7</sub>CH<sub>3</sub>**

|   |             |             |             |
|---|-------------|-------------|-------------|
| C | -8.14252900 | -0.36385100 | -0.25279500 |
| H | -8.26241800 | -1.36961600 | 0.15872700  |
| H | -8.14155500 | -0.44973800 | -1.34261600 |
| H | -9.01702000 | 0.22267400  | 0.03608100  |
| C | -6.84760500 | 0.27510500  | 0.24199500  |
| H | -6.76119000 | 1.29190100  | -0.15591200 |
| H | -6.87650600 | 0.37214000  | 1.33287900  |
| C | -5.60873700 | -0.52318800 | -0.15812100 |
| H | -5.57928600 | -0.61867300 | -1.25048400 |
| H | -5.69211100 | -1.54307300 | 0.23767600  |
| C | -4.30717900 | 0.10831700  | 0.32767700  |
| H | -4.33020100 | 0.19209400  | 1.42134700  |
| H | -4.22558700 | 1.12957000  | -0.06158900 |
| C | -3.06717800 | -0.67734800 | -0.09269800 |
| H | -3.04561400 | -0.77025600 | -1.18461600 |
| H | -3.12444000 | -1.69963400 | 0.30508600  |
| C | -1.77214800 | -0.03738800 | 0.37747000  |
| H | -1.77243800 | 0.10022400  | 1.46528600  |
| H | -1.76255200 | 1.02574700  | -0.06292200 |
| C | -0.49726200 | -0.71868700 | -0.08868000 |
| H | -0.51954700 | -0.81524800 | -1.18016000 |
| H | -0.47188600 | -1.74029500 | 0.31371100  |
| C | 0.76630700  | 0.02874400  | 0.33044900  |
| H | 0.78531900  | 0.12643100  | 1.42319200  |
| H | 0.72320600  | 1.04622400  | -0.07554400 |
| C | 2.05064700  | -0.64936300 | -0.13877200 |
| H | 2.02434300  | -0.75552500 | -1.22998200 |
| H | 2.09768800  | -1.66653100 | 0.26893300  |
| C | 3.30966200  | 0.11539600  | 0.26243100  |
| H | 3.34099700  | 0.21625100  | 1.35429500  |
| H | 3.25493000  | 1.13457000  | -0.13907800 |
| C | 4.59700900  | -0.54741000 | -0.22087700 |
| H | 4.56269800  | -0.65130900 | -1.31226500 |

|   |             |             |             |
|---|-------------|-------------|-------------|
| H | 4.65635000  | -1.56546300 | 0.18306900  |
| C | 5.85333900  | 0.22568000  | 0.17222900  |
| H | 5.89264700  | 0.32466900  | 1.26413300  |
| H | 5.78993400  | 1.24590300  | -0.22596900 |
| C | 7.14267400  | -0.42666200 | -0.32092900 |
| H | 7.10175700  | -0.52354500 | -1.41136700 |
| H | 7.20591400  | -1.44542300 | 0.07676600  |
| C | 8.38806000  | 0.36035300  | 0.07959600  |
| H | 8.46398800  | 0.44070400  | 1.16731600  |
| H | 9.30048300  | -0.11492800 | -0.28588800 |
| H | 8.35274200  | 1.37509600  | -0.32560400 |
| O | -1.71785700 | 2.45464600  | -0.52470300 |
| H | -1.41815200 | 2.82970400  | 0.31927800  |

**OH-R56: OH + CH<sub>3</sub>(CH<sub>2</sub>)<sub>12</sub>CH<sub>3</sub> → H<sub>2</sub>O + CH<sub>3</sub>(CH<sub>2</sub>)<sub>5</sub>CH(CH<sub>2</sub>)<sub>6</sub>CH<sub>3</sub>  
CH<sub>3</sub>(CH<sub>2</sub>)<sub>5</sub>CH(CH<sub>2</sub>)<sub>6</sub>CH<sub>3</sub>**

|   |             |             |             |
|---|-------------|-------------|-------------|
| C | -8.20377400 | -0.66319800 | 0.24222200  |
| H | -8.10985400 | -1.44035900 | 1.00523100  |
| H | -8.28000400 | -1.15992100 | -0.72857800 |
| H | -9.13974100 | -0.13009800 | 0.42027800  |
| C | -7.00325500 | 0.27928100  | 0.27688100  |
| H | -7.12874700 | 1.06521900  | -0.47572800 |
| H | -6.95936200 | 0.78588800  | 1.24707600  |
| C | -5.68148100 | -0.44455300 | 0.02956800  |
| H | -5.72402600 | -0.95259200 | -0.94165300 |
| H | -5.55440400 | -1.23209100 | 0.78235900  |
| C | -4.47089300 | 0.48490800  | 0.06102200  |
| H | -4.42882200 | 0.99168300  | 1.03282800  |
| H | -4.59925500 | 1.27274000  | -0.69125500 |
| C | -3.15151700 | -0.24088500 | -0.18755100 |
| H | -3.19062700 | -0.74348500 | -1.16119100 |
| H | -3.01866400 | -1.02868000 | 0.56247000  |
| C | -1.93935600 | 0.69004300  | -0.15380900 |
| H | -1.89472700 | 1.20102700  | 0.81783100  |
| H | -2.08872300 | 1.49458000  | -0.89443000 |
| C | -0.64601500 | -0.00580400 | -0.40929100 |
| H | -0.65505600 | -0.91071700 | -1.01114800 |
| C | 0.65719400  | 0.67963300  | -0.17679600 |
| H | 0.63616400  | 1.18541200  | 0.79839900  |
| H | 0.79685800  | 1.48735100  | -0.91582100 |
| C | 1.86183900  | -0.25941200 | -0.24058100 |
| H | 1.87821400  | -0.75562300 | -1.21815200 |
| H | 1.73815300  | -1.05131800 | 0.50668700  |

|   |            |             |             |
|---|------------|-------------|-------------|
| C | 3.19088000 | 0.45551600  | -0.01321700 |
| H | 3.17192900 | 0.95490700  | 0.96310300  |
| H | 3.30953400 | 1.24830800  | -0.76182400 |
| C | 4.39429500 | -0.48200900 | -0.07634100 |
| H | 4.41354300 | -0.98129000 | -1.05268600 |
| H | 4.27558900 | -1.27490100 | 0.67198500  |
| C | 5.72449200 | 0.23163000  | 0.15146700  |
| H | 5.70659000 | 0.73009900  | 1.12841100  |
| H | 5.84336000 | 1.02570900  | -0.59588200 |
| C | 6.92936000 | -0.70442200 | 0.08662100  |
| H | 6.94612700 | -1.20117700 | -0.88950300 |
| H | 6.80946900 | -1.49665900 | 0.83349900  |
| C | 8.25133400 | 0.02389100  | 0.31635600  |
| H | 8.26434200 | 0.50518000  | 1.29778000  |
| H | 9.10153100 | -0.65922700 | 0.26682900  |
| H | 8.40199500 | 0.80231300  | -0.43621700 |

**TS56: OH + CH<sub>3</sub>(CH<sub>2</sub>)<sub>12</sub>CH<sub>3</sub> → H<sub>2</sub>O + CH<sub>3</sub>(CH<sub>2</sub>)<sub>5</sub>CH(CH<sub>2</sub>)<sub>6</sub>CH<sub>3</sub>**

|   |             |             |             |
|---|-------------|-------------|-------------|
| C | -8.20398000 | 0.25352400  | 0.09023200  |
| H | -8.16838500 | 1.27116600  | -0.30754000 |
| H | -8.28507700 | 0.32577400  | 1.17815200  |
| H | -9.11394400 | -0.22045100 | -0.28291800 |
| C | -6.95564600 | -0.52865700 | -0.31048500 |
| H | -7.01877800 | -1.55032600 | 0.07968100  |
| H | -6.90974600 | -0.61742600 | -1.40138400 |
| C | -5.66965900 | 0.12267800  | 0.19263000  |
| H | -5.71350700 | 0.21362200  | 1.28512100  |
| H | -5.60635900 | 1.14555100  | -0.19850200 |
| C | -4.41038600 | -0.64500900 | -0.20144000 |
| H | -4.37267300 | -0.74222700 | -1.29318900 |
| H | -4.46751400 | -1.66527100 | 0.19722700  |
| C | -3.12741600 | 0.02157500  | 0.28767200  |
| H | -3.16061800 | 0.11526800  | 1.38046100  |
| H | -3.07080400 | 1.04014900  | -0.11385700 |
| C | -1.86419800 | -0.73462300 | -0.11672800 |
| H | -1.82768500 | -0.82771200 | -1.20816400 |
| H | -1.90355200 | -1.75730800 | 0.28182800  |
| C | -0.59049500 | -0.06511300 | 0.36918900  |
| H | -0.60419500 | 0.06953100  | 1.45729800  |
| H | -0.58549100 | 0.99916700  | -0.06831200 |
| C | 0.70614700  | -0.71360000 | -0.08477700 |
| H | 0.69801000  | -0.80540000 | -1.17695700 |
| H | 0.75160500  | -1.73652800 | 0.31281900  |

|   |             |             |             |
|---|-------------|-------------|-------------|
| C | 1.94519700  | 0.06443100  | 0.35211200  |
| H | 1.95495800  | 0.14700000  | 1.44603700  |
| H | 1.87366000  | 1.08652600  | -0.03689100 |
| C | 3.24986900  | -0.57267300 | -0.11832400 |
| H | 3.23082100  | -0.67031200 | -1.21055600 |
| H | 3.32548200  | -1.59164300 | 0.28090200  |
| C | 4.48510800  | 0.22486900  | 0.29326300  |
| H | 4.50564400  | 0.32505500  | 1.38543300  |
| H | 4.40575200  | 1.24272800  | -0.10728000 |
| C | 5.79293800  | -0.40315000 | -0.18067300 |
| H | 5.76868700  | -0.51235200 | -1.27195600 |
| H | 5.87904400  | -1.41788400 | 0.22732100  |
| C | 7.02671400  | 0.40485600  | 0.21581100  |
| H | 7.04978400  | 0.51480300  | 1.30556100  |
| H | 6.93879200  | 1.41696000  | -0.19403100 |
| C | 8.32680900  | -0.23424800 | -0.26507300 |
| H | 8.33201400  | -0.33249300 | -1.35385900 |
| H | 9.19763700  | 0.35863600  | 0.02194100  |
| H | 8.44816700  | -1.23496800 | 0.15817200  |
| O | -0.61273500 | 2.42937800  | -0.52833200 |
| H | -0.91585600 | 2.80617000  | 0.31366300  |

### 3.1.15 C15 (*n*-C<sub>15</sub>H<sub>32</sub>)

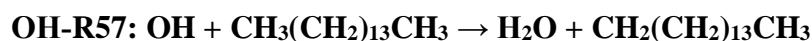

*n*-C<sub>15</sub>H<sub>32</sub>

|   |            |             |             |
|---|------------|-------------|-------------|
| C | 8.91111800 | -0.41275300 | -0.00008400 |
| H | 8.94047500 | -1.05745500 | -0.88251700 |
| H | 8.94055700 | -1.05745600 | 0.88234700  |
| H | 9.81639700 | 0.19765100  | -0.00012600 |
| C | 7.65028300 | 0.44830100  | -0.00002500 |
| H | 7.65106700 | 1.10480800  | 0.87691800  |
| H | 7.65099500 | 1.10482000  | -0.87695800 |
| C | 6.37108300 | -0.38587200 | 0.00002000  |
| H | 6.36939700 | -1.04418100 | -0.87747900 |
| H | 6.36945500 | -1.04417900 | 0.87752000  |
| C | 5.09956900 | 0.45905200  | 0.00005900  |
| H | 5.10158600 | 1.11695500  | -0.87756400 |
| H | 5.10162000 | 1.11693000  | 0.87770100  |
| C | 3.82269400 | -0.37815300 | 0.00006800  |
| H | 3.82123900 | -1.03614400 | 0.87760900  |
| H | 3.82123300 | -1.03614900 | -0.87746900 |
| C | 2.54975500 | 0.46495600  | 0.00006800  |
| H | 2.55075700 | 1.12285600  | -0.87754100 |



|   |             |             |             |
|---|-------------|-------------|-------------|
| H | 2.55073800  | 1.12283300  | 0.87769300  |
| C | 1.27423900  | -0.37425100 | 0.00004100  |
| H | 1.27372800  | -1.03223700 | 0.87759700  |
| H | 1.27376800  | -1.03223900 | -0.87751500 |
| C | 0.00000000  | 0.46689000  | 0.00000900  |
| H | 0.00002400  | 1.12477700  | -0.87761100 |
| H | -0.00002100 | 1.12477400  | 0.87763200  |
| C | -1.27424000 | -0.37424700 | -0.00002500 |
| H | -1.27377300 | -1.03223600 | 0.87753100  |
| H | -1.27372900 | -1.03223400 | -0.87758100 |
| C | -2.54975400 | 0.46496200  | -0.00005500 |
| H | -2.55073300 | 1.12284000  | -0.87767900 |
| H | -2.55075900 | 1.12286000  | 0.87755400  |
| C | -3.82269400 | -0.37814600 | -0.00006200 |
| H | -3.82123900 | -1.03614000 | 0.87747700  |
| H | -3.82123400 | -1.03614000 | -0.87760100 |
| C | -5.09956900 | 0.45905800  | -0.00006300 |
| H | -5.10161600 | 1.11693200  | -0.87770800 |
| H | -5.10159300 | 1.11696500  | 0.87755700  |
| C | -6.37108200 | -0.38586900 | -0.00002800 |
| H | -6.36939900 | -1.04417500 | 0.87747300  |
| H | -6.36944700 | -1.04418000 | -0.87752600 |
| C | -7.65028400 | 0.44829900  | 0.00000700  |
| H | -7.65106900 | 1.10479800  | -0.87694100 |
| H | -7.65100100 | 1.10482500  | 0.87693500  |
| C | -8.91111600 | -0.41276000 | 0.00007100  |
| H | -8.94047200 | -1.05745600 | 0.88250900  |
| H | -9.81639800 | 0.19764000  | 0.00010700  |
| H | -8.94055200 | -1.05746900 | -0.88235500 |

**CH<sub>2</sub>(CH<sub>2</sub>)<sub>13</sub>CH<sub>3</sub>**

|   |            |             |             |
|---|------------|-------------|-------------|
| C | 8.96388900 | -0.39119600 | -0.02667900 |
| H | 8.98286800 | -1.35642200 | 0.46460300  |
| H | 9.90209500 | 0.01428700  | -0.38081900 |
| C | 7.72394600 | 0.43263200  | -0.01004700 |
| H | 7.70881600 | 1.07758100  | 0.88405200  |
| H | 7.72060800 | 1.12033500  | -0.86361800 |
| C | 6.44434700 | -0.40711800 | -0.02203000 |
| H | 6.44051800 | -1.04083900 | -0.91591000 |
| H | 6.45352400 | -1.08559500 | 0.83931500  |
| C | 5.17485500 | 0.43934000  | 0.01084300  |
| H | 5.17146900 | 1.12053500  | -0.84881700 |
| H | 5.18311300 | 1.07320700  | 0.90599500  |

|   |             |             |             |
|---|-------------|-------------|-------------|
| C | 3.89760200  | -0.39701300 | -0.00428200 |
| H | 3.89816500  | -1.07487400 | 0.85793200  |
| H | 3.89293200  | -1.03447600 | -0.89673600 |
| C | 2.62595100  | 0.44772400  | 0.01865800  |
| H | 2.62574100  | 1.12500500  | -0.84405600 |
| H | 2.63015100  | 1.08584400  | 0.91073900  |
| C | 1.34906200  | -0.38920700 | 0.00272000  |
| H | 1.34786800  | -1.06476500 | 0.86678500  |
| H | 1.34678100  | -1.02926100 | -0.88798700 |
| C | 0.07670200  | 0.45456900  | 0.02043000  |
| H | 0.07830500  | 1.13034200  | -0.84347900 |
| H | 0.07815500  | 1.09433100  | 0.91135500  |
| C | -1.19963900 | -0.38316100 | 0.00270200  |
| H | -1.20196600 | -1.05808400 | 0.86727400  |
| H | -1.19986600 | -1.02393200 | -0.88750700 |
| C | -2.47270200 | 0.45962200  | 0.01745600  |
| H | -2.46998100 | 1.13502300  | -0.84674400 |
| H | -2.47345700 | 1.09979400  | 0.90808900  |
| C | -3.74828600 | -0.37921500 | -0.00232600 |
| H | -3.75132000 | -1.05424300 | 0.86215500  |
| H | -3.74663300 | -1.01992400 | -0.89257200 |
| C | -5.02229200 | 0.46224300  | 0.01062800  |
| H | -5.01895500 | 1.13795100  | -0.85335000 |
| H | -5.02514500 | 1.10210700  | 0.90149800  |
| C | -6.29678500 | -0.37785300 | -0.01147300 |
| H | -6.30090900 | -1.05395100 | 0.85237100  |
| H | -6.29409100 | -1.01812200 | -0.90222800 |
| C | -7.57289600 | 0.46094800  | 0.00062300  |
| H | -7.56695900 | 1.13629400  | -0.86185500 |
| H | -7.57549600 | 1.09835900  | 0.89155300  |
| C | -8.83690500 | -0.39502800 | -0.02458900 |
| H | -8.87367500 | -1.05848500 | 0.84351100  |
| H | -9.73988400 | 0.21872300  | -0.01646900 |
| H | -8.86386900 | -1.02046900 | -0.92087500 |

**TS57: OH + CH<sub>3</sub>(CH<sub>2</sub>)<sub>13</sub>CH<sub>3</sub> → H<sub>2</sub>O + CH<sub>2</sub>(CH<sub>2</sub>)<sub>13</sub>CH<sub>3</sub>**

|   |             |             |             |
|---|-------------|-------------|-------------|
| C | -8.13838600 | 0.71769900  | -0.00422500 |
| H | -8.18486200 | 1.39625100  | -0.85879400 |
| H | -8.24834300 | 1.27885800  | 0.92570100  |
| H | -9.10645000 | 0.07380900  | -0.10969300 |
| C | -6.91382300 | -0.17614600 | -0.02480200 |
| H | -6.93463300 | -0.85889700 | 0.83204600  |
| H | -6.92952400 | -0.80022200 | -0.92390000 |

|   |              |             |             |
|---|--------------|-------------|-------------|
| C | -5.61203900  | 0.62883800  | 0.01060400  |
| H | -5.58590200  | 1.30725600  | -0.85021200 |
| H | -5.60111100  | 1.26314000  | 0.90490300  |
| C | -4.36615900  | -0.25399900 | -0.00189000 |
| H | -4.38496000  | -0.89484800 | -0.89153400 |
| H | -4.38894500  | -0.92681800 | 0.86387300  |
| C | -3.06738700  | 0.54860500  | 0.01549600  |
| H | -3.05072400  | 1.19208500  | 0.90351400  |
| H | -3.04586000  | 1.21998500  | -0.85144500 |
| C | -1.81809900  | -0.32910300 | 0.00441000  |
| H | -1.83666200  | -0.97542900 | -0.88149500 |
| H | -1.83631800  | -0.99762600 | 0.87370800  |
| C | -0.52096700  | 0.47621500  | 0.01400200  |
| H | -0.50307600  | 1.12330300  | 0.89944100  |
| H | -0.50385500  | 1.14449100  | -0.85553500 |
| C | 0.73074600   | -0.39793400 | 0.00250600  |
| H | 0.71252900   | -1.04609300 | -0.88211800 |
| H | 0.71553600   | -1.06493100 | 0.87306700  |
| C | 2.02600400   | 0.41042000  | 0.00879500  |
| H | 2.04349700   | 1.05902900  | 0.89314400  |
| H | 2.04038100   | 1.07736900  | -0.86183200 |
| C | 3.27992300   | -0.46057900 | -0.00274300 |
| H | 3.26302000   | -1.10930800 | -0.88698800 |
| H | 3.26657200   | -1.12715800 | 0.86817800  |
| C | 4.57324700   | 0.35087700  | 0.00289500  |
| H | 4.58919700   | 1.00007800  | 0.88683200  |
| H | 4.58607900   | 1.01735500  | -0.86811400 |
| C | 5.82937300   | -0.51701900 | -0.00794800 |
| H | 5.81471100   | -1.16564100 | -0.89233600 |
| H | 5.81697900   | -1.18380600 | 0.86285200  |
| C | 7.12066600   | 0.29732300  | -0.00104400 |
| H | 7.13515200   | 0.94664900  | 0.88301800  |
| H | 7.13355900   | 0.96433100  | -0.87184900 |
| C | 8.37985900   | -0.56665200 | -0.01090600 |
| H | 8.36534600   | -1.21341300 | -0.89494500 |
| H | 8.36570200   | -1.23248900 | 0.85884200  |
| C | 9.66033400   | 0.26485900  | -0.00192500 |
| H | 9.70425900   | 0.89935300  | 0.88729900  |
| H | 10.55136100  | -0.36610100 | -0.00832000 |
| H | 9.70476300   | 0.91809300  | -0.87741700 |
| O | -10.11034000 | -0.93189600 | -0.08119300 |
| H | -9.76444300  | -1.42389100 | 0.68030100  |

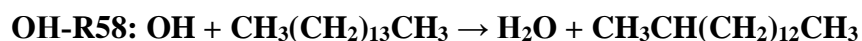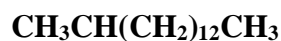

|   |             |             |             |
|---|-------------|-------------|-------------|
| C | -9.00831600 | -0.25963100 | -0.13353500 |
| H | -9.28439700 | -0.84582000 | 0.75592200  |
| H | -8.99108400 | -0.96306600 | -0.97312400 |
| H | -9.80891400 | 0.46060900  | -0.30846600 |
| C | -7.68635400 | 0.40616500  | 0.03482800  |
| H | -7.64987200 | 1.43103900  | 0.38877300  |
| C | -6.43248400 | -0.39984900 | 0.06247000  |
| H | -6.40871400 | -1.02988000 | 0.96847100  |
| H | -6.43578600 | -1.10914000 | -0.77727600 |
| C | -5.15931400 | 0.44425000  | 0.01434800  |
| H | -5.15746500 | 1.13885500  | 0.86270800  |
| H | -5.17245200 | 1.06109200  | -0.89139400 |
| C | -3.88412200 | -0.39374400 | 0.04315300  |
| H | -3.88697200 | -1.08732000 | -0.80654600 |
| H | -3.87777100 | -1.01484600 | 0.94723200  |
| C | -2.61188700 | 0.44923800  | 0.00113400  |
| H | -2.60723300 | 1.14025200  | 0.85285000  |
| H | -2.61982100 | 1.07303300  | -0.90092300 |
| C | -1.33548100 | -0.38824400 | 0.02428100  |
| H | -1.33877600 | -1.07708100 | -0.82922000 |
| H | -1.32927200 | -1.01447400 | 0.92475400  |
| C | -0.06288200 | 0.45449500  | -0.01281300 |
| H | -0.05960900 | 1.14298100  | 0.84098100  |
| H | -0.06890900 | 1.08109500  | -0.91300800 |
| C | 1.21333300  | -0.38327100 | 0.01038000  |
| H | 1.21118000  | -1.07043300 | -0.84448600 |
| H | 1.21795200  | -1.01133800 | 0.90958600  |
| C | 2.48634800  | 0.45902400  | -0.02288900 |
| H | 2.48787000  | 1.14669200  | 0.83157400  |
| H | 2.48272700  | 1.08650700  | -0.92249100 |
| C | 3.76210100  | -0.37938000 | 0.00265900  |
| H | 3.76162100  | -1.06597800 | -0.85265200 |
| H | 3.76429100  | -1.00808800 | 0.90141700  |
| C | 5.03580900  | 0.46208500  | -0.02692800 |
| H | 5.03531700  | 1.14982900  | 0.82749600  |
| H | 5.03527700  | 1.08948900  | -0.92661000 |
| C | 6.31072600  | -0.37711900 | 0.00257400  |
| H | 6.31286200  | -1.06451900 | -0.85229600 |
| H | 6.31074700  | -1.00565700 | 0.90164300  |
| C | 7.58632300  | 0.46211900  | -0.02392200 |

|   |            |             |             |
|---|------------|-------------|-------------|
| H | 7.58167800 | 1.14932900  | 0.82912000  |
| H | 7.58675300 | 1.08721700  | -0.92353100 |
| C | 8.85095300 | -0.39256600 | 0.01079500  |
| H | 8.88738100 | -1.06721600 | -0.84861500 |
| H | 9.75346500 | 0.22168900  | -0.00619500 |
| H | 8.87941000 | -1.00629300 | 0.91509300  |

**TS58: OH + CH<sub>3</sub>(CH<sub>2</sub>)<sub>13</sub>CH<sub>3</sub> → H<sub>2</sub>O + CH<sub>3</sub>CH(CH<sub>2</sub>)<sub>12</sub>CH<sub>3</sub>**

|   |             |             |             |
|---|-------------|-------------|-------------|
| C | 8.39729600  | -0.80076500 | -0.14899500 |
| H | 8.40718000  | -0.87668200 | -1.23860800 |
| H | 8.46060300  | -1.81484200 | 0.25847700  |
| H | 9.28936000  | -0.25498800 | 0.16198700  |
| C | 7.12962700  | -0.11624800 | 0.33090800  |
| H | 7.13850400  | 0.02767200  | 1.41640700  |
| H | 7.13737000  | 0.94612600  | -0.11426600 |
| C | 5.83941200  | -0.78044800 | -0.11817800 |
| H | 5.85051400  | -0.88818600 | -1.20885400 |
| H | 5.80502500  | -1.79821100 | 0.29386600  |
| C | 4.58851100  | -0.01569000 | 0.30664000  |
| H | 4.62303500  | 0.98819600  | -0.13265900 |
| H | 4.59545200  | 0.11560600  | 1.39610300  |
| C | 3.29147200  | -0.70460400 | -0.10939900 |
| H | 3.25435600  | -1.70887100 | 0.33000500  |
| H | 3.28957400  | -0.84378300 | -1.19711300 |
| C | 2.04404700  | 0.07360900  | 0.30195400  |
| H | 2.08482200  | 1.07805900  | -0.13674400 |
| H | 2.04567800  | 0.21299100  | 1.38997200  |
| C | 0.74358600  | -0.60688100 | -0.11749500 |
| H | 0.69865400  | -1.60991300 | 0.32412500  |
| H | 0.74425500  | -0.74963000 | -1.20491400 |
| C | -0.50108700 | 0.17943300  | 0.28699700  |
| H | -0.45189800 | 1.18363600  | -0.15157200 |
| H | -0.50388500 | 0.31958800  | 1.37485200  |
| C | -1.80385500 | -0.49276500 | -0.13860100 |
| H | -1.85699700 | -1.49564300 | 0.30250000  |
| H | -1.79924300 | -0.63544600 | -1.22606900 |
| C | -3.04571900 | 0.30082500  | 0.26040500  |
| H | -2.98828400 | 1.30514600  | -0.17694700 |
| H | -3.05293100 | 0.44008400  | 1.34834400  |
| C | -4.35034400 | -0.36322300 | -0.17216400 |
| H | -4.41117000 | -1.36641600 | 0.26724200  |
| H | -4.34160200 | -0.50452600 | -1.25979700 |
| C | -5.58988600 | 0.43640300  | 0.22218500  |

|   |              |             |             |
|---|--------------|-------------|-------------|
| H | -5.52557000  | 1.44085000  | -0.21397500 |
| H | -5.60112200  | 0.57466500  | 1.31023300  |
| C | -6.89563000  | -0.22090300 | -0.21653400 |
| H | -6.96368600  | -1.22440600 | 0.22151700  |
| H | -6.88375200  | -0.36166600 | -1.30437900 |
| C | -8.13460700  | 0.58268600  | 0.17260000  |
| H | -8.06325300  | 1.58505200  | -0.26376100 |
| H | -8.14703100  | 0.72034800  | 1.25930400  |
| C | -9.43217900  | -0.08365100 | -0.27702900 |
| H | -9.53652100  | -1.07517100 | 0.17164300  |
| H | -10.30681100 | 0.50559500  | 0.00586300  |
| H | -9.44883700  | -0.20859900 | -1.36295300 |
| O | 7.02382800   | 2.36880400  | -0.54895500 |
| H | 6.58372800   | 2.69626400  | 0.25205100  |

**OH-R59: OH + CH<sub>3</sub>(CH<sub>2</sub>)<sub>13</sub>CH<sub>3</sub> → H<sub>2</sub>O + CH<sub>3</sub>CH<sub>2</sub>CH(CH<sub>2</sub>)<sub>11</sub>CH<sub>3</sub>  
CH<sub>3</sub>CH<sub>2</sub>CH(CH<sub>2</sub>)<sub>11</sub>CH<sub>3</sub>**

|   |             |             |             |
|---|-------------|-------------|-------------|
| C | 8.88695400  | -0.62986500 | 0.15800800  |
| H | 8.96027500  | -1.17120900 | -0.78847400 |
| H | 8.73167500  | -1.36424100 | 0.95168200  |
| H | 9.84231000  | -0.13303300 | 0.33593200  |
| C | 7.73411900  | 0.37125500  | 0.11699700  |
| H | 7.69810300  | 0.94000200  | 1.05577400  |
| H | 7.93166200  | 1.12338900  | -0.66418100 |
| C | 6.40854600  | -0.26808300 | -0.12299800 |
| H | 6.38000000  | -1.25689500 | -0.57336300 |
| C | 5.15178000  | 0.53226500  | -0.08018500 |
| H | 5.11161800  | 1.21713300  | -0.94476800 |
| H | 5.16313300  | 1.18674000  | 0.80245900  |
| C | 3.88303200  | -0.32051500 | -0.06876800 |
| H | 3.90460100  | -0.98334800 | 0.80366200  |
| H | 3.88006600  | -0.97029800 | -0.95198400 |
| C | 2.60337200  | 0.51091400  | -0.04790100 |
| H | 2.58730300  | 1.17371800  | -0.92175600 |
| H | 2.60875600  | 1.16373500  | 0.83351100  |
| C | 1.33591200  | -0.34022900 | -0.03718500 |
| H | 1.35055000  | -1.00139900 | 0.83775100  |
| H | 1.33195400  | -0.99469000 | -0.91734100 |
| C | 0.05472200  | 0.49012500  | -0.02063400 |
| H | 0.04099100  | 1.15194100  | -0.89520100 |
| H | 0.05783200  | 1.14404200  | 0.85993200  |
| C | -1.21269000 | -0.36118400 | -0.01246200 |
| H | -1.19993800 | -1.02198300 | 0.86286200  |

|   |             |             |             |
|---|-------------|-------------|-------------|
| H | -1.21448900 | -1.01619900 | -0.89223500 |
| C | -2.49432700 | 0.46852600  | 0.00073200  |
| H | -2.50641800 | 1.12991100  | -0.87418300 |
| H | -2.49355000 | 1.12291500  | 0.88096200  |
| C | -3.76128000 | -0.38349900 | 0.00646700  |
| H | -3.74987200 | -1.04417400 | 0.88190900  |
| H | -3.76096100 | -1.03869800 | -0.87316500 |
| C | -5.04364500 | 0.44520200  | 0.01704000  |
| H | -5.05479800 | 1.10626100  | -0.85815000 |
| H | -5.04494300 | 1.09991000  | 0.89705600  |
| C | -6.30973700 | -0.40778900 | 0.02096200  |
| H | -6.29985200 | -1.06853600 | 0.89657200  |
| H | -6.30825400 | -1.06357600 | -0.85842700 |
| C | -7.59400900 | 0.41851300  | 0.02938900  |
| H | -7.60257200 | 1.07762400  | -0.84556100 |
| H | -7.59475100 | 1.07241700  | 0.90828500  |
| C | -8.84964600 | -0.45007400 | 0.03239600  |
| H | -8.87191100 | -1.09690200 | 0.91347200  |
| H | -9.75848200 | 0.15499600  | 0.03721800  |
| H | -8.87864800 | -1.09293400 | -0.85139700 |

**TS59: OH + CH<sub>3</sub>(CH<sub>2</sub>)<sub>13</sub>CH<sub>3</sub> → H<sub>2</sub>O + CH<sub>3</sub>CH<sub>2</sub>CH(CH<sub>2</sub>)<sub>11</sub>CH<sub>3</sub>**

|   |            |             |             |
|---|------------|-------------|-------------|
| C | 8.46191700 | -0.03129200 | 0.27797300  |
| H | 8.52172300 | 0.00043700  | 1.36919300  |
| H | 8.43122300 | 0.99795500  | -0.08723900 |
| H | 9.37437900 | -0.50025700 | -0.09450800 |
| C | 7.21747300 | -0.78999800 | -0.17534000 |
| H | 7.19468300 | -0.85181400 | -1.26808100 |
| H | 7.24913300 | -1.82235300 | 0.19459100  |
| C | 5.93347100 | -0.13711100 | 0.30876300  |
| H | 5.94357900 | -0.00984700 | 1.39792000  |
| H | 5.94093500 | 0.93035200  | -0.12024700 |
| C | 4.64685100 | -0.79717100 | -0.15437900 |
| H | 4.60683400 | -1.81810600 | 0.24863700  |
| H | 4.66354800 | -0.89449500 | -1.24586400 |
| C | 3.39582900 | -0.03166100 | 0.27012200  |
| H | 3.43893400 | 0.97763800  | -0.15610000 |
| H | 3.39578000 | 0.08702700  | 1.36097600  |
| C | 2.09918500 | -0.71057000 | -0.16268800 |
| H | 2.05660900 | -1.72030600 | 0.26359000  |
| H | 2.10303000 | -0.83601500 | -1.25209700 |
| C | 0.85129000 | 0.06527700  | 0.25169300  |
| H | 0.89448400 | 1.07385600  | -0.17713200 |

|   |              |             |             |
|---|--------------|-------------|-------------|
| H | 0.84935200   | 0.19413000  | 1.34101600  |
| C | -0.44805800  | -0.61064700 | -0.17837200 |
| H | -0.49419200  | -1.61778400 | 0.25370600  |
| H | -0.44412500  | -0.74337600 | -1.26706800 |
| C | -1.69437000  | 0.17110200  | 0.22984800  |
| H | -1.64683900  | 1.17816400  | -0.20225100 |
| H | -1.69840400  | 0.30423700  | 1.31859000  |
| C | -2.99515500  | -0.50167300 | -0.20087000 |
| H | -3.04515500  | -1.50766200 | 0.23347100  |
| H | -2.98991200  | -0.63716000 | -1.28926100 |
| C | -4.23986400  | 0.28469600  | 0.20346700  |
| H | -4.18826600  | 1.29103800  | -0.22986400 |
| H | -4.24571200  | 0.41942100  | 1.29198400  |
| C | -5.54192000  | -0.38460000 | -0.22891800 |
| H | -5.59498900  | -1.39050500 | 0.20531900  |
| H | -5.53576400  | -0.52012200 | -1.31732900 |
| C | -6.78523400  | 0.40440200  | 0.17392600  |
| H | -6.73170000  | 1.41112400  | -0.25871200 |
| H | -6.79306100  | 0.53899500  | 1.26260600  |
| C | -8.08909200  | -0.26111100 | -0.25988500 |
| H | -8.14149700  | -1.26621600 | 0.17269400  |
| H | -8.08042000  | -0.39405100 | -1.34719500 |
| C | -9.32183100  | 0.54041000  | 0.15097400  |
| H | -9.30010800  | 1.54010200  | -0.29097500 |
| H | -10.24483300 | 0.05243200  | -0.16838200 |
| H | -9.36353000  | 0.65961100  | 1.23690600  |
| O | 5.92368500   | 2.36051600  | -0.58109800 |
| H | 5.54183500   | 2.72909600  | 0.23200000  |

**OH-R60: OH + CH<sub>3</sub>(CH<sub>2</sub>)<sub>13</sub>CH<sub>3</sub> → H<sub>2</sub>O + CH<sub>3</sub>(CH<sub>2</sub>)<sub>2</sub>CH(CH<sub>2</sub>)<sub>10</sub>CH<sub>3</sub>  
CH<sub>3</sub>(CH<sub>2</sub>)<sub>2</sub>CH(CH<sub>2</sub>)<sub>10</sub>CH<sub>3</sub>**

|   |            |             |             |
|---|------------|-------------|-------------|
| C | 8.94639800 | -0.05340200 | 0.34938100  |
| H | 9.20045700 | -0.67923200 | -0.51031200 |
| H | 8.93582100 | -0.69441800 | 1.23494700  |
| H | 9.74445900 | 0.68050800  | 0.47712000  |
| C | 7.59224000 | 0.62105300  | 0.15061000  |
| H | 7.36504300 | 1.26485200  | 1.00615700  |
| H | 7.62753300 | 1.27318100  | -0.72848900 |
| C | 6.45474900 | -0.38605100 | -0.02548600 |
| H | 6.69662500 | -1.04757700 | -0.87540000 |
| H | 6.41294400 | -1.04887300 | 0.84999600  |
| C | 5.12383100 | 0.25184600  | -0.23308600 |
| H | 5.08924500 | 1.24024100  | -0.68436200 |



|   |             |             |             |
|---|-------------|-------------|-------------|
| C | 3.86404300  | -0.54272000 | -0.17007400 |
| H | 3.88099900  | -1.18893100 | 0.71847200  |
| H | 3.80982300  | -1.23528400 | -1.02772300 |
| C | 2.60192900  | 0.31978400  | -0.15248000 |
| H | 2.59261700  | 0.95862700  | -1.04360700 |
| H | 2.64136100  | 0.99354400  | 0.71097300  |
| C | 1.31455000  | -0.49824200 | -0.10349900 |
| H | 1.32454900  | -1.13946300 | 0.78633200  |
| H | 1.27942300  | -1.17210600 | -0.96829500 |
| C | 0.05756400  | 0.36829100  | -0.08703900 |
| H | 0.04990900  | 1.01110500  | -0.97572500 |
| H | 0.09265300  | 1.04101100  | 0.77849200  |
| C | -1.23426800 | -0.44413600 | -0.04165900 |
| H | -1.22827900 | -1.08608800 | 0.84764500  |
| H | -1.26919800 | -1.11743900 | -0.90682000 |
| C | -2.48909200 | 0.42562100  | -0.02798200 |
| H | -2.49323500 | 1.06889100  | -0.91637400 |
| H | -2.45481900 | 1.09788900  | 0.83800300  |
| C | -3.78251400 | -0.38448200 | 0.01379300  |
| H | -3.77972500 | -1.02667100 | 0.90295000  |
| H | -3.81600600 | -1.05769200 | -0.85149100 |
| C | -5.03673400 | 0.48625000  | 0.02424800  |
| H | -5.03889800 | 1.12888700  | -0.86462500 |
| H | -5.00397400 | 1.15906500  | 0.88989300  |
| C | -6.33016600 | -0.32360900 | 0.06415600  |
| H | -6.32969900 | -0.96516900 | 0.95397300  |
| H | -6.36258100 | -0.99811900 | -0.80035500 |
| C | -7.58603100 | 0.54527200  | 0.07134400  |
| H | -7.58594300 | 1.18411100  | -0.81855200 |
| H | -7.55227700 | 1.21888100  | 0.93456300  |
| C | -8.86952300 | -0.28045900 | 0.11297700  |
| H | -8.89962900 | -0.90547500 | 1.00945900  |
| H | -9.75786100 | 0.35431700  | 0.11649200  |
| H | -8.93318200 | -0.94265300 | -0.75455700 |

**TS60: OH + CH<sub>3</sub>(CH<sub>2</sub>)<sub>13</sub>CH<sub>3</sub> → H<sub>2</sub>O + CH<sub>3</sub>(CH<sub>2</sub>)<sub>2</sub>CH(CH<sub>2</sub>)<sub>10</sub>CH<sub>3</sub>**

|   |             |             |             |
|---|-------------|-------------|-------------|
| C | -8.56746800 | -0.56700200 | -0.25373000 |
| H | -8.67760700 | -1.58047600 | 0.14137500  |
| H | -8.55732300 | -0.63474800 | -1.34467600 |
| H | -9.45135500 | 0.00394400  | 0.03719300  |
| C | -7.28643500 | 0.08420900  | 0.26005900  |
| H | -7.20413000 | 1.10576800  | -0.12439000 |
| H | -7.32358800 | 0.16279100  | 1.35235200  |

|   |             |             |             |
|---|-------------|-------------|-------------|
| C | -6.03444000 | -0.69155000 | -0.14393000 |
| H | -6.09239800 | -1.71564800 | 0.24950500  |
| H | -5.99677300 | -0.78112600 | -1.23587200 |
| C | -4.75044400 | -0.04597500 | 0.34777000  |
| H | -4.77091600 | 0.09430000  | 1.43507900  |
| H | -4.73726300 | 1.01624200  | -0.09480800 |
| C | -3.46518600 | -0.72484100 | -0.09272100 |
| H | -3.46867300 | -0.82923900 | -1.18365600 |
| H | -3.44271100 | -1.74350700 | 0.31725600  |
| C | -2.21167700 | 0.03018600  | 0.34271000  |
| H | -2.21640300 | 0.14330700  | 1.43412100  |
| H | -2.24683500 | 1.04186200  | -0.07834600 |
| C | -0.91671800 | -0.65311000 | -0.08832800 |
| H | -0.91916700 | -0.77600600 | -1.17805100 |
| H | -0.87765400 | -1.66388400 | 0.33579400  |
| C | 0.33233700  | 0.11946300  | 0.32867800  |
| H | 0.33786900  | 0.23982700  | 1.41896100  |
| H | 0.28666500  | 1.13135600  | -0.09200800 |
| C | 1.63112600  | -0.55056800 | -0.11208900 |
| H | 1.62122400  | -0.67697200 | -1.20152000 |
| H | 1.68339100  | -1.55996900 | 0.31392500  |
| C | 2.87678300  | 0.23411700  | 0.29257400  |
| H | 2.89051600  | 0.35645500  | 1.38251400  |
| H | 2.81869600  | 1.24514400  | -0.12889000 |
| C | 4.17770100  | -0.42505600 | -0.15817900 |
| H | 4.16071700  | -0.55202800 | -1.24749600 |
| H | 4.24133900  | -1.43391800 | 0.26758500  |
| C | 5.42042300  | 0.36916900  | 0.23705700  |
| H | 5.44041200  | 0.49288900  | 1.32675900  |
| H | 5.35258800  | 1.37931000  | -0.18515900 |
| C | 6.72264900  | -0.28181800 | -0.22107000 |
| H | 6.70143600  | -0.40905000 | -1.31046000 |
| H | 6.79509200  | -1.29060600 | 0.20390900  |
| C | 7.96441100  | 0.51786700  | 0.16724500  |
| H | 7.98595500  | 0.64249000  | 1.25540700  |
| H | 7.88876600  | 1.52531200  | -0.25647300 |
| C | 9.25853800  | -0.14203700 | -0.30139300 |
| H | 9.26587100  | -0.25434400 | -1.38880100 |
| H | 10.13510600 | 0.44469600  | -0.01926900 |
| H | 9.36753100  | -1.13856900 | 0.13487800  |
| O | -4.68981500 | 2.44473900  | -0.55625200 |
| H | -4.38146100 | 2.81815900  | 0.28535900  |

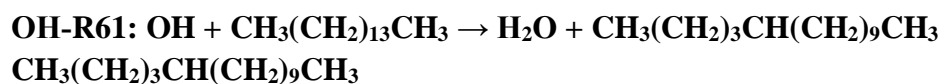

|   |             |             |             |
|---|-------------|-------------|-------------|
| C | -8.81801300 | -0.79944700 | 0.30997100  |
| H | -8.64588000 | -1.55697800 | 1.07897700  |
| H | -8.90551600 | -1.31557200 | -0.64967400 |
| H | -9.77552800 | -0.31924600 | 0.52073800  |
| C | -7.67537200 | 0.21252500  | 0.27972500  |
| H | -7.87949800 | 0.97769100  | -0.47716000 |
| H | -7.62039600 | 0.73593400  | 1.24043400  |
| C | -6.32596600 | -0.43735400 | -0.01502300 |
| H | -6.11607100 | -1.20423400 | 0.73927800  |
| H | -6.37663200 | -0.95742600 | -0.97908700 |
| C | -5.17068000 | 0.56336700  | -0.04545000 |
| H | -5.11538400 | 1.09076300  | 0.91670400  |
| H | -5.39897900 | 1.34596700  | -0.78948500 |
| C | -3.85054400 | -0.06012600 | -0.34684700 |
| H | -3.83120200 | -0.96285300 | -0.95179600 |
| C | -2.57863900 | 0.69366200  | -0.15592000 |
| H | -2.59561400 | 1.19916800  | 0.81944300  |
| H | -2.50437000 | 1.50622100  | -0.89905400 |
| C | -1.32919200 | -0.18148200 | -0.25723500 |
| H | -1.31584300 | -0.67550600 | -1.23594800 |
| H | -1.38997100 | -0.97925000 | 0.49156900  |
| C | -0.03274200 | 0.60087300  | -0.06690400 |
| H | -0.04896000 | 1.09753300  | 0.91086500  |
| H | 0.02331700  | 1.39949000  | -0.81663300 |
| C | 1.21468700  | -0.27374300 | -0.16718900 |
| H | 1.23184300  | -0.76924300 | -1.14547400 |
| H | 1.15737100  | -1.07329700 | 0.58125300  |
| C | 2.51295000  | 0.50616200  | 0.02613400  |
| H | 2.49609200  | 1.00100300  | 1.00477000  |
| H | 2.57011300  | 1.30626000  | -0.72183900 |
| C | 3.75997800  | -0.36898100 | -0.07512900 |
| H | 3.77664900  | -0.86386200 | -1.05374600 |
| H | 3.70264400  | -1.16914000 | 0.67273800  |
| C | 5.05882500  | 0.41002900  | 0.11815900  |
| H | 5.04252100  | 0.90471200  | 1.09691000  |
| H | 5.11620500  | 1.21030400  | -0.62963600 |
| C | 6.30540100  | -0.46538500 | 0.01637400  |
| H | 6.32213500  | -0.96092200 | -0.96209200 |
| H | 6.24918700  | -1.26565500 | 0.76445000  |
| C | 7.60557400  | 0.31226700  | 0.20839900  |

|   |            |             |             |
|---|------------|-------------|-------------|
| H | 7.58762900 | 0.80657200  | 1.18575000  |
| H | 7.66061700 | 1.11053200  | -0.53967100 |
| C | 8.84217300 | -0.57701700 | 0.10404100  |
| H | 8.89147600 | -1.06050300 | -0.87515100 |
| H | 9.76216900 | -0.00568900 | 0.24239500  |
| H | 8.81923800 | -1.36485700 | 0.86152100  |

**TS61: OH + CH<sub>3</sub>(CH<sub>2</sub>)<sub>13</sub>CH<sub>3</sub> → H<sub>2</sub>O + CH<sub>3</sub>(CH<sub>2</sub>)<sub>3</sub>CH(CH<sub>2</sub>)<sub>9</sub>CH<sub>3</sub>**

|   |             |             |             |
|---|-------------|-------------|-------------|
| C | -8.63056000 | 0.18922700  | 0.16771700  |
| H | -8.58501200 | 1.21698000  | -0.20164500 |
| H | -8.70856700 | 0.23155300  | 1.25741400  |
| H | -9.54591100 | -0.26525000 | -0.21639400 |
| C | -7.39104700 | -0.59354000 | -0.25824300 |
| H | -7.46273000 | -1.62509200 | 0.10390300  |
| H | -7.34930700 | -0.65170400 | -1.35126800 |
| C | -6.09881000 | 0.03466400  | 0.25759200  |
| H | -6.01975800 | 1.06473700  | -0.10868800 |
| H | -6.13738800 | 0.09499100  | 1.35250300  |
| C | -4.84877200 | -0.73446200 | -0.16266100 |
| H | -4.81683100 | -0.81259800 | -1.25553700 |
| H | -4.90068300 | -1.76242200 | 0.22102300  |
| C | -3.56335100 | -0.08978200 | 0.32707000  |
| H | -3.57937100 | 0.04550800  | 1.41506400  |
| H | -3.55335600 | 0.97423000  | -0.11092600 |
| C | -2.27905500 | -0.76460700 | -0.12224200 |
| H | -2.28813900 | -0.86586700 | -1.21345600 |
| H | -2.25195100 | -1.78435100 | 0.28476800  |
| C | -1.02502200 | -0.00773900 | 0.30853000  |
| H | -1.02436700 | 0.10284000  | 1.40021100  |
| H | -1.06488700 | 1.00482300  | -0.10994900 |
| C | 0.26925200  | -0.68697900 | -0.13080000 |
| H | 0.26067900  | -0.80925200 | -1.22057000 |
| H | 0.31384200  | -1.69788400 | 0.29249200  |
| C | 1.51861100  | 0.08886800  | 0.27921300  |
| H | 1.52915000  | 0.21032300  | 1.36935000  |
| H | 1.46865600  | 1.10022500  | -0.14225400 |
| C | 2.81661900  | -0.57908400 | -0.16692500 |
| H | 2.80264600  | -0.70558600 | -1.25630400 |
| H | 2.87197400  | -1.58839600 | 0.25893200  |
| C | 4.06286100  | 0.20706400  | 0.23309800  |
| H | 4.07973100  | 0.33039700  | 1.32288200  |
| H | 4.00289900  | 1.21764900  | -0.18911700 |
| C | 5.36286400  | -0.45196900 | -0.22059300 |

|   |             |             |             |
|---|-------------|-------------|-------------|
| H | 5.34418100  | -0.57778000 | -1.31004500 |
| H | 5.42660300  | -1.46134200 | 0.20402100  |
| C | 6.60655100  | 0.34069100  | 0.17388000  |
| H | 6.62881700  | 0.46318900  | 1.26382200  |
| H | 6.54005100  | 1.35175900  | -0.24665300 |
| C | 7.90871200  | -0.31035600 | -0.28608600 |
| H | 7.88526700  | -0.43088000 | -1.37464900 |
| H | 7.97475600  | -1.31987800 | 0.13415400  |
| C | 9.14121500  | 0.49589400  | 0.11617800  |
| H | 9.19915600  | 0.60099700  | 1.20286400  |
| H | 10.06312200 | 0.02026500  | -0.22428100 |
| H | 9.10405300  | 1.50114800  | -0.31194000 |
| O | -3.51210600 | 2.40249500  | -0.57519400 |
| H | -3.21088200 | 2.77936200  | 0.26744900  |

**OH-R62: OH + CH<sub>3</sub>(CH<sub>2</sub>)<sub>13</sub>CH<sub>3</sub> → H<sub>2</sub>O + CH<sub>3</sub>(CH<sub>2</sub>)<sub>4</sub>CH(CH<sub>2</sub>)<sub>8</sub>CH<sub>3</sub>  
CH<sub>3</sub>(CH<sub>2</sub>)<sub>4</sub>CH(CH<sub>2</sub>)<sub>8</sub>CH<sub>3</sub>**

|   |             |             |             |
|---|-------------|-------------|-------------|
| C | 8.89766600  | 0.00126500  | 0.45692500  |
| H | 9.11767900  | -0.70101500 | -0.35140000 |
| H | 8.87827100  | -0.56514500 | 1.39169300  |
| H | 9.72190300  | 0.71485600  | 0.51448900  |
| C | 7.56208000  | 0.70157100  | 0.21896600  |
| H | 7.37235400  | 1.41890700  | 1.02465300  |
| H | 7.61035900  | 1.28409800  | -0.70740700 |
| C | 6.39311700  | -0.27743000 | 0.13477100  |
| H | 6.58205000  | -0.99735800 | -0.67105600 |
| H | 6.34352500  | -0.86094600 | 1.06232500  |
| C | 5.05103100  | 0.40870900  | -0.10344000 |
| H | 5.09752500  | 0.98565600  | -1.03465200 |
| H | 4.85977600  | 1.13036300  | 0.69870600  |
| C | 3.88115500  | -0.57286800 | -0.18057300 |
| H | 3.82843400  | -1.15601200 | 0.74884000  |
| H | 4.09063700  | -1.31221700 | -0.97278400 |
| C | 2.56692200  | 0.08539000  | -0.42910000 |
| H | 2.55253100  | 1.01298900  | -0.99534400 |
| C | 1.28580300  | -0.65462900 | -0.24595000 |
| H | 1.30838100  | -1.19341700 | 0.71138800  |
| H | 1.18866300  | -1.44035000 | -1.01487600 |
| C | 0.04882800  | 0.24205900  | -0.29939100 |
| H | 0.02700900  | 0.76625500  | -1.26212800 |
| H | 0.13412900  | 1.01526900  | 0.47245100  |
| C | -1.25610900 | -0.52656800 | -0.11105600 |
| H | -1.23179300 | -1.05170700 | 0.85155100  |

|   |             |             |             |
|---|-------------|-------------|-------------|
| H | -1.33574100 | -1.30218300 | -0.88249900 |
| C | -2.49202700 | 0.36817300  | -0.16572700 |
| H | -2.51909800 | 0.89001200  | -1.12999100 |
| H | -2.41006400 | 1.14641400  | 0.60263300  |
| C | -3.79780900 | -0.39848400 | 0.03007500  |
| H | -3.77130100 | -0.91832300 | 0.99544300  |
| H | -3.87883900 | -1.17845800 | -0.73671100 |
| C | -5.03413800 | 0.49563900  | -0.02739300 |
| H | -5.06195100 | 1.01368100  | -0.99372000 |
| H | -4.95203600 | 1.27708500  | 0.73779700  |
| C | -6.33965300 | -0.27016700 | 0.17200800  |
| H | -6.31336300 | -0.78706800 | 1.13914600  |
| H | -6.42201500 | -1.05300900 | -0.59193700 |
| C | -7.57719100 | 0.62264400  | 0.11254200  |
| H | -7.60286900 | 1.13694900  | -0.85425900 |
| H | -7.49318000 | 1.40438400  | 0.87523000  |
| C | -8.87389900 | -0.15725000 | 0.31534100  |
| H | -8.87892400 | -0.65659800 | 1.28778000  |
| H | -9.74795800 | 0.49532000  | 0.26923500  |
| H | -8.98875200 | -0.92674700 | -0.45257900 |

**TS62: OH + CH<sub>3</sub>(CH<sub>2</sub>)<sub>13</sub>CH<sub>3</sub> → H<sub>2</sub>O + CH<sub>3</sub>(CH<sub>2</sub>)<sub>4</sub>CH(CH<sub>2</sub>)<sub>8</sub>CH<sub>3</sub>**

|   |             |             |             |
|---|-------------|-------------|-------------|
| C | -8.73460700 | -0.40409200 | -0.29559800 |
| H | -8.84968500 | -1.40298300 | 0.13363500  |
| H | -8.72842700 | -0.50980700 | -1.38361400 |
| H | -9.61402400 | 0.18180900  | -0.02089600 |
| C | -7.44612400 | 0.25236800  | 0.19286200  |
| H | -7.36350400 | 1.26123000  | -0.22588500 |
| H | -7.48162000 | 0.37194700  | 1.28133500  |
| C | -6.20043700 | -0.54694100 | -0.18328300 |
| H | -6.27858400 | -1.55738400 | 0.23673700  |
| H | -6.16506700 | -0.66850500 | -1.27278200 |
| C | -4.90509300 | 0.10416500  | 0.29307000  |
| H | -4.93666500 | 0.21955700  | 1.38386300  |
| H | -4.82850900 | 1.11357600  | -0.12797500 |
| C | -3.65670700 | -0.68446100 | -0.09556400 |
| H | -3.61850700 | -0.79452800 | -1.18534700 |
| H | -3.71955300 | -1.70008000 | 0.31789500  |
| C | -2.37080300 | -0.03546000 | 0.38570800  |
| H | -2.38488900 | 0.11307100  | 1.47200300  |
| H | -2.34162900 | 1.02289300  | -0.06500500 |
| C | -1.08630500 | -0.71611100 | -0.05579500 |
| H | -1.09134700 | -0.81814800 | -1.14707700 |

|   |             |             |             |
|---|-------------|-------------|-------------|
| H | -1.06465500 | -1.73590000 | 0.35165000  |
| C | 0.16647700  | 0.04023100  | 0.37981600  |
| H | 0.17481900  | 0.12926200  | 1.47323600  |
| H | 0.11538100  | 1.06121100  | -0.01533800 |
| C | 1.46041500  | -0.62363700 | -0.08318300 |
| H | 1.44278800  | -0.72663300 | -1.17494000 |
| H | 1.51633800  | -1.64168200 | 0.32159100  |
| C | 2.70824100  | 0.15416000  | 0.32799600  |
| H | 2.72858400  | 0.25753300  | 1.41985100  |
| H | 2.64616800  | 1.17195700  | -0.07572900 |
| C | 4.00682800  | -0.49602600 | -0.14201000 |
| H | 3.98095600  | -0.60918700 | -1.23269100 |
| H | 4.07698900  | -1.50994300 | 0.27058400  |
| C | 5.25047400  | 0.29717800  | 0.25242900  |
| H | 5.27786200  | 0.41039200  | 1.34315200  |
| H | 5.17706000  | 1.31111300  | -0.15952600 |
| C | 6.55113000  | -0.34586800 | -0.22109700 |
| H | 6.52138000  | -0.46544600 | -1.31118000 |
| H | 6.63065900  | -1.35734200 | 0.19617700  |
| C | 7.79316200  | 0.45564400  | 0.16259800  |
| H | 7.82230200  | 0.57432600  | 1.25127700  |
| H | 7.71115900  | 1.46512400  | -0.25500000 |
| C | 9.08595400  | -0.19742000 | -0.31916500 |
| H | 9.08569000  | -0.30373000 | -1.40720500 |
| H | 9.96270400  | 0.39055300  | -0.04016200 |
| H | 9.20119500  | -1.19596500 | 0.11086600  |
| O | -2.33779100 | 2.44730700  | -0.54347400 |
| H | -2.63866700 | 2.84087700  | 0.29157700  |

**OH-R63: OH + CH<sub>3</sub>(CH<sub>2</sub>)<sub>13</sub>CH<sub>3</sub> → H<sub>2</sub>O + CH<sub>3</sub>(CH<sub>2</sub>)<sub>5</sub>CH(CH<sub>2</sub>)<sub>7</sub>CH<sub>3</sub>  
CH<sub>3</sub>(CH<sub>2</sub>)<sub>5</sub>CH(CH<sub>2</sub>)<sub>7</sub>CH<sub>3</sub>**

|   |            |             |             |
|---|------------|-------------|-------------|
| C | 8.81359900 | -0.81971200 | 0.21189900  |
| H | 8.89309200 | -1.19793200 | -0.81066300 |
| H | 8.68800300 | -1.68011700 | 0.87440000  |
| H | 9.75951100 | -0.33695400 | 0.46511100  |
| C | 7.63647600 | 0.14346400  | 0.34429400  |
| H | 7.59018000 | 0.53163200  | 1.36754600  |
| H | 7.79325000 | 1.00997600  | -0.30721600 |
| C | 6.30119900 | -0.51048300 | -0.00416500 |
| H | 6.34654400 | -0.90117600 | -1.02812800 |
| H | 6.14245400 | -1.37780300 | 0.64824400  |
| C | 5.11351700 | 0.44040800  | 0.12160600  |
| H | 5.27190600 | 1.30650900  | -0.53250600 |

|   |             |             |             |
|---|-------------|-------------|-------------|
| H | 5.07011000  | 0.83198100  | 1.14521900  |
| C | 3.78065100  | -0.21763300 | -0.22421700 |
| H | 3.61748500  | -1.08200900 | 0.42931200  |
| H | 3.82201700  | -0.60704800 | -1.24831000 |
| C | 2.59064800  | 0.73383500  | -0.09889900 |
| H | 2.76722700  | 1.61088600  | -0.74516400 |
| H | 2.54702700  | 1.13614800  | 0.92263300  |
| C | 1.28461800  | 0.10116400  | -0.44003900 |
| H | 1.28146700  | -0.73996500 | -1.12838000 |
| C | -0.00624900 | 0.79246000  | -0.16069700 |
| H | -0.13486000 | 1.64704700  | -0.84718900 |
| H | 0.02457800  | 1.23450100  | 0.84446300  |
| C | -1.22570200 | -0.12211300 | -0.28097800 |
| H | -1.11617000 | -0.95760300 | 0.41955000  |
| H | -1.24684100 | -0.56101400 | -1.28551300 |
| C | -2.54449000 | 0.59873800  | -0.01573500 |
| H | -2.65188900 | 1.43110800  | -0.72187800 |
| H | -2.51902800 | 1.04602600  | 0.98539800  |
| C | -3.76034000 | -0.31800100 | -0.12735200 |
| H | -3.65412400 | -1.14812400 | 0.58138800  |
| H | -3.78349700 | -0.76858500 | -1.12700700 |
| C | -5.08196700 | 0.40110600  | 0.13234800  |
| H | -5.18887900 | 1.23043600  | -0.57736700 |
| H | -5.05881100 | 0.85274100  | 1.13155700  |
| C | -6.29675300 | -0.51692000 | 0.02190600  |
| H | -6.19127400 | -1.34576700 | 0.73259300  |
| H | -6.31955300 | -0.97027800 | -0.97668500 |
| C | -7.62021800 | 0.20040500  | 0.27879200  |
| H | -7.72455600 | 1.02729600  | -0.43199900 |
| H | -7.59628700 | 0.65257000  | 1.27621400  |
| C | -8.82425600 | -0.73137600 | 0.16481500  |
| H | -8.75150600 | -1.55006400 | 0.88553900  |
| H | -9.76153300 | -0.20332800 | 0.35089900  |
| H | -8.88044000 | -1.17314900 | -0.83352900 |

**TS63: OH + CH<sub>3</sub>(CH<sub>2</sub>)<sub>13</sub>CH<sub>3</sub> → H<sub>2</sub>O + CH<sub>3</sub>(CH<sub>2</sub>)<sub>5</sub>CH(CH<sub>2</sub>)<sub>7</sub>CH<sub>3</sub>**

|   |             |             |             |
|---|-------------|-------------|-------------|
| C | -8.79484800 | 0.34315200  | 0.11032200  |
| H | -8.74386400 | 1.35640000  | -0.29693500 |
| H | -8.87035000 | 0.42680700  | 1.19783700  |
| H | -9.71404900 | -0.11905400 | -0.25498800 |
| C | -7.56108000 | -0.46315700 | -0.28788700 |
| H | -7.63962800 | -1.48010000 | 0.11181800  |
| H | -7.52094700 | -0.56256700 | -1.37810200 |



|   |             |             |             |
|---|-------------|-------------|-------------|
| C | -6.26270700 | 0.17141400  | 0.20465600  |
| H | -6.18445900 | 1.19004900  | -0.19460400 |
| H | -6.30050100 | 0.27162200  | 1.29655300  |
| C | -5.01732200 | -0.61920300 | -0.18843300 |
| H | -4.98427200 | -0.72237900 | -1.27982300 |
| H | -5.09062400 | -1.63652200 | 0.21534500  |
| C | -3.72257900 | 0.02896900  | 0.29425700  |
| H | -3.74998500 | 0.12519900  | 1.38690800  |
| H | -3.65010600 | 1.04603200  | -0.10792000 |
| C | -2.47322200 | -0.74855200 | -0.11306800 |
| H | -2.44603500 | -0.85185700 | -1.20389100 |
| H | -2.52266500 | -1.76725400 | 0.29469500  |
| C | -1.18697500 | -0.09133600 | 0.35690300  |
| H | -1.19372000 | 0.05723800  | 1.44331400  |
| H | -1.17744700 | 0.96668700  | -0.09558000 |
| C | 0.09785500  | -0.76408500 | -0.09481900 |
| H | 0.08362700  | -0.86982800 | -1.18562400 |
| H | 0.13062600  | -1.78220400 | 0.31598300  |
| C | 1.35009500  | 0.00109100  | 0.32662800  |
| H | 1.36411400  | 0.10076800  | 1.41920800  |
| H | 1.29350300  | 1.01754800  | -0.07966600 |
| C | 2.64442900  | -0.66161300 | -0.13695200 |
| H | 2.62263400  | -0.77211700 | -1.22786500 |
| H | 2.70482400  | -1.67663900 | 0.27457500  |
| C | 3.89163100  | 0.12232100  | 0.26436200  |
| H | 3.91720400  | 0.23033600  | 1.35568100  |
| H | 3.82439600  | 1.13818200  | -0.14348500 |
| C | 5.18991100  | -0.52574800 | -0.20950900 |
| H | 5.16110800  | -0.63846700 | -1.30017800 |
| H | 5.26245100  | -1.53975500 | 0.20248100  |
| C | 6.43354900  | 0.26842500  | 0.18209400  |
| H | 6.46627400  | 0.37811000  | 1.27318300  |
| H | 6.35756400  | 1.28395600  | -0.22580400 |
| C | 7.73437200  | -0.36998000 | -0.29891600 |
| H | 7.69977400  | -0.47858200 | -1.38845900 |
| H | 7.81079900  | -1.38361600 | 0.10948600  |
| C | 8.96634400  | 0.43931100  | 0.09886900  |
| H | 9.03603900  | 0.53215800  | 1.18601200  |
| H | 9.88732700  | -0.02626600 | -0.25760700 |
| H | 8.91791200  | 1.44918000  | -0.31708000 |
| O | -1.16596500 | 2.39422600  | -0.56442500 |
| H | -1.16051400 | 2.79705700  | 0.31889600  |

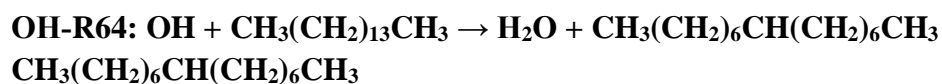

|   |             |             |             |
|---|-------------|-------------|-------------|
| C | 8.88790700  | -0.05296200 | 0.37915900  |
| H | 9.04466900  | -0.81577100 | -0.38801700 |
| H | 8.88682300  | -0.55515300 | 1.35014000  |
| H | 9.74145900  | 0.62732800  | 0.35471100  |
| C | 7.57191700  | 0.68593900  | 0.14885200  |
| H | 7.44600700  | 1.46245700  | 0.91110400  |
| H | 7.60295700  | 1.20352800  | -0.81603300 |
| C | 6.36248100  | -0.24594700 | 0.17854300  |
| H | 6.48734400  | -1.02424300 | -0.58428500 |
| H | 6.33033500  | -0.76533600 | 1.14416000  |
| C | 5.03813400  | 0.47824100  | -0.05014900 |
| H | 5.07156800  | 0.99848700  | -1.01509700 |
| H | 4.91333500  | 1.25524400  | 0.71370400  |
| C | 3.83036600  | -0.45534200 | -0.02219500 |
| H | 3.79761400  | -0.97594800 | 0.94261300  |
| H | 3.95501400  | -1.23206900 | -0.78651800 |
| C | 2.50681700  | 0.26969500  | -0.24969100 |
| H | 2.53655500  | 0.78680000  | -1.21605200 |
| H | 2.37720300  | 1.04578900  | 0.51300800  |
| C | 1.29824900  | -0.66601200 | -0.22016300 |
| H | 1.26413500  | -1.19258500 | 0.74355200  |
| H | 1.44389400  | -1.45809300 | -0.97482400 |
| C | 0.00000000  | 0.02874300  | -0.45277900 |
| H | 0.00000000  | 0.94331000  | -1.03994300 |
| C | -1.29824900 | -0.66601200 | -0.22016300 |
| H | -1.26413500 | -1.19258500 | 0.74355100  |
| H | -1.44389400 | -1.45809300 | -0.97482500 |
| C | -2.50681700 | 0.26969500  | -0.24969000 |
| H | -2.53655500 | 0.78680100  | -1.21605100 |
| H | -2.37720300 | 1.04578900  | 0.51300900  |
| C | -3.83036600 | -0.45534200 | -0.02219500 |
| H | -3.79761400 | -0.97594800 | 0.94261300  |
| H | -3.95501400 | -1.23206900 | -0.78651800 |
| C | -5.03813400 | 0.47824100  | -0.05014800 |
| H | -5.07156800 | 0.99848700  | -1.01509600 |
| H | -4.91333500 | 1.25524400  | 0.71370400  |
| C | -6.36248100 | -0.24594700 | 0.17854300  |
| H | -6.33033500 | -0.76533600 | 1.14416000  |
| H | -6.48734400 | -1.02424300 | -0.58428500 |
| C | -7.57191700 | 0.68593900  | 0.14885200  |

|   |             |             |             |
|---|-------------|-------------|-------------|
| H | -7.60295700 | 1.20352800  | -0.81603300 |
| H | -7.44600700 | 1.46245600  | 0.91110400  |
| C | -8.88790700 | -0.05296200 | 0.37915900  |
| H | -8.88682300 | -0.55515300 | 1.35014000  |
| H | -9.74145900 | 0.62732700  | 0.35471000  |
| H | -9.04466800 | -0.81577100 | -0.38801700 |

**TS64: OH + CH<sub>3</sub>(CH<sub>2</sub>)<sub>13</sub>CH<sub>3</sub> → H<sub>2</sub>O + CH<sub>3</sub>(CH<sub>2</sub>)<sub>6</sub>CH(CH<sub>2</sub>)<sub>6</sub>CH<sub>3</sub>**

|   |             |             |             |
|---|-------------|-------------|-------------|
| C | -8.90724500 | -0.29768000 | -0.31023900 |
| H | -9.02062400 | -1.29530300 | 0.12239500  |
| H | -8.90417900 | -0.40703400 | -1.39794700 |
| H | -9.78625400 | 0.28858700  | -0.03489300 |
| C | -7.61756700 | 0.36066800  | 0.17259900  |
| H | -7.53714500 | 1.36877800  | -0.24858800 |
| H | -7.64991100 | 0.48321600  | 1.26076900  |
| C | -6.37243700 | -0.43891100 | -0.20497400 |
| H | -6.44939200 | -1.44852000 | 0.21724800  |
| H | -6.34036200 | -0.56365400 | -1.29435300 |
| C | -5.07479600 | 0.21114000  | 0.26717400  |
| H | -5.10486900 | 0.33165000  | 1.35709200  |
| H | -5.00300900 | 1.22212500  | -0.15213400 |
| C | -3.82834500 | -0.58139800 | -0.11942100 |
| H | -3.80243100 | -0.70610600 | -1.20864600 |
| H | -3.89350300 | -1.59074500 | 0.30497600  |
| C | -2.53327000 | 0.08212000  | 0.34090000  |
| H | -2.55342800 | 0.20012000  | 1.43163000  |
| H | -2.47073800 | 1.09110700  | -0.08349400 |
| C | -1.28208800 | -0.69557000 | -0.06033900 |
| H | -1.25685800 | -0.81020600 | -1.15000000 |
| H | -1.32881000 | -1.70988500 | 0.35839100  |
| C | 0.00304100  | -0.03070700 | 0.40108700  |
| H | 0.00160000  | 0.12276000  | 1.48676700  |
| H | 0.01495000  | 1.02584700  | -0.05463200 |
| C | 1.28877000  | -0.69955000 | -0.05443100 |
| H | 1.27023000  | -0.80687500 | -1.14508100 |
| H | 1.32705900  | -1.71712500 | 0.35739700  |
| C | 2.53938200  | 0.07188200  | 0.36068600  |
| H | 2.56154300  | 0.16619800  | 1.45349000  |
| H | 2.47266000  | 1.09036100  | -0.03854900 |
| C | 3.83332700  | -0.58165000 | -0.11671300 |
| H | 3.80297300  | -0.68798800 | -1.20789000 |
| H | 3.90325100  | -1.59802000 | 0.29012800  |
| C | 5.07979500  | 0.20757100  | 0.27665200  |

|   |             |             |             |
|---|-------------|-------------|-------------|
| H | 5.11306200  | 0.31375300  | 1.36796200  |
| H | 5.00465300  | 1.22381900  | -0.12878500 |
| C | 6.37706400  | -0.43405700 | -0.20789600 |
| H | 6.34089500  | -0.54719800 | -1.29846700 |
| H | 6.45831900  | -1.44795500 | 0.20317600  |
| C | 7.62179600  | 0.36454300  | 0.17309100  |
| H | 7.65720000  | 0.47746100  | 1.26222500  |
| H | 7.53807000  | 1.37618500  | -0.23879500 |
| C | 8.91137800  | -0.28683200 | -0.31945500 |
| H | 8.90484400  | -0.38735500 | -1.40802300 |
| H | 9.79005400  | 0.29915200  | -0.04234500 |
| H | 9.02839300  | -1.28768300 | 0.10469600  |
| O | -0.00137900 | 2.44750800  | -0.54114200 |
| H | -0.31004100 | 2.84104800  | 0.29109400  |

### 3.1.16 C16 (*n*-C<sub>16</sub>H<sub>34</sub>)

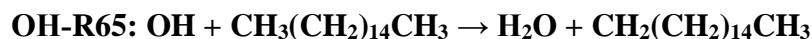

*n*-C<sub>16</sub>H<sub>34</sub>

|   |              |             |             |
|---|--------------|-------------|-------------|
| C | -9.55330000  | -0.34393500 | -0.00005100 |
| H | -9.59047900  | -0.98826600 | 0.88236500  |
| H | -9.59045100  | -0.98825200 | -0.88247900 |
| H | -10.45113500 | 0.27736900  | -0.00006000 |
| C | -8.28200800  | 0.50161300  | -0.00002400 |
| H | -8.27479200  | 1.15808700  | -0.87696000 |
| H | -8.27481900  | 1.15807200  | 0.87692400  |
| C | -7.01321800  | -0.34831600 | -0.00001200 |
| H | -7.01958500  | -1.00659200 | -0.87751500 |
| H | -7.01960900  | -1.00660400 | 0.87748100  |
| C | -5.73130800  | 0.48073400  | 0.00001000  |
| H | -5.72531200  | 1.13860300  | 0.87764400  |
| H | -5.72529200  | 1.13861800  | -0.87761200 |
| C | -4.46489900  | -0.37223100 | 0.00001700  |
| H | -4.47141700  | -1.03018100 | -0.87753200 |
| H | -4.47143000  | -1.03018800 | 0.87756000  |
| C | -3.18175800  | 0.45523900  | 0.00002900  |
| H | -3.17493000  | 1.11311600  | 0.87763300  |
| H | -3.17492200  | 1.11312700  | -0.87756800 |
| C | -1.91631900  | -0.39910600 | 0.00002900  |
| H | -1.92340100  | -1.05702800 | -0.87754500 |
| H | -1.92340100  | -1.05702900 | 0.87760300  |
| C | -0.63256400  | 0.42740300  | 0.00002900  |
| H | -0.62536500  | 1.08529800  | 0.87762100  |
| H | -0.62536700  | 1.08530000  | -0.87756100 |

|   |             |             |             |
|---|-------------|-------------|-------------|
| C | 0.63256400  | -0.42740300 | 0.00002600  |
| H | 0.62536200  | -1.08530200 | -0.87756300 |
| H | 0.62537100  | -1.08529600 | 0.87761900  |
| C | 1.91631900  | 0.39910600  | 0.00001600  |
| H | 1.92340600  | 1.05703300  | 0.87758700  |
| H | 1.92339700  | 1.05702500  | -0.87756100 |
| C | 3.18175800  | -0.45523900 | 0.00001300  |
| H | 3.17491900  | -1.11312800 | -0.87758200 |
| H | 3.17493200  | -1.11311400 | 0.87761900  |
| C | 4.46489900  | 0.37223100  | -0.00000300 |
| H | 4.47142900  | 1.03019300  | 0.87753600  |
| H | 4.47141900  | 1.03017500  | -0.87755500 |
| C | 5.73130800  | -0.48073400 | -0.00000200 |
| H | 5.72529600  | -1.13862000 | -0.87762200 |
| H | 5.72530800  | -1.13860000 | 0.87763500  |
| C | 7.01321800  | 0.34831600  | -0.00002000 |
| H | 7.01960200  | 1.00661000  | 0.87746900  |
| H | 7.01959300  | 1.00658500  | -0.87752700 |
| C | 8.28200800  | -0.50161300 | -0.00001400 |
| H | 8.27480100  | -1.15809200 | -0.87694700 |
| H | 8.27481000  | -1.15806700 | 0.87693700  |
| C | 9.55330000  | 0.34393500  | -0.00003300 |
| H | 9.59046900  | 0.98827300  | 0.88237900  |
| H | 10.45113500 | -0.27736900 | -0.00002700 |
| H | 9.59046200  | 0.98824500  | -0.88246500 |

**CH<sub>2</sub>(CH<sub>2</sub>)<sub>14</sub>CH<sub>3</sub>**

|   |              |             |             |
|---|--------------|-------------|-------------|
| C | -9.60656900  | 0.32201800  | 0.00959600  |
| H | -9.63172400  | 1.28088500  | 0.51247000  |
| H | -10.54470700 | -0.09448800 | -0.33105100 |
| C | -8.35611500  | -0.48593700 | 0.00289400  |
| H | -8.32084600  | -1.13664300 | 0.89225800  |
| H | -8.35587400  | -1.16807900 | -0.85502800 |
| C | -7.08726500  | 0.36971000  | -0.01984600 |
| H | -7.09849800  | 1.04884000  | 0.84089500  |
| H | -7.09806200  | 1.00278200  | -0.91401900 |
| C | -5.80725400  | -0.46103600 | 0.00505800  |
| H | -5.80117000  | -1.14384300 | -0.85324500 |
| H | -5.80226800  | -1.09349500 | 0.90115800  |
| C | -4.54011000  | 0.39031900  | -0.01893000 |
| H | -4.54623300  | 1.07322200  | 0.83922400  |
| H | -4.54533800  | 1.02271000  | -0.91488300 |
| C | -3.25870600  | -0.43950200 | 0.00571800  |

|   |             |             |             |
|---|-------------|-------------|-------------|
| H | -3.25215400 | -1.12146900 | -0.85321000 |
| H | -3.25436100 | -1.07304600 | 0.90098000  |
| C | -1.99122900 | 0.41146300  | -0.01608200 |
| H | -1.99759000 | 1.09300800  | 0.84318900  |
| H | -1.99577600 | 1.04549400  | -0.91098500 |
| C | -0.70982200 | -0.41835200 | 0.00776400  |
| H | -0.70316800 | -1.09936100 | -0.85193800 |
| H | -0.70569700 | -1.05298600 | 0.90226600  |
| C | 0.55782100  | 0.43240400  | -0.01288700 |
| H | 0.55151300  | 1.11295300  | 0.84718300  |
| H | 0.55340300  | 1.06752600  | -0.90703500 |
| C | 1.83918800  | -0.39750400 | 0.00994800  |
| H | 1.84552200  | -1.07786000 | -0.85027900 |
| H | 1.84354900  | -1.03284800 | 0.90394600  |
| C | 3.10688500  | 0.45317700  | -0.01049900 |
| H | 3.10095100  | 1.13307700  | 0.85009000  |
| H | 3.10215500  | 1.08900700  | -0.90414800 |
| C | 4.38824300  | -0.37677800 | 0.01117200  |
| H | 4.39414100  | -1.05665100 | -0.84942900 |
| H | 4.39311600  | -1.01263900 | 0.90478800  |
| C | 5.65598300  | 0.47389800  | -0.00949200 |
| H | 5.65042800  | 1.15350300  | 0.85135400  |
| H | 5.65088600  | 1.11005900  | -0.90292500 |
| C | 6.93728500  | -0.35581200 | 0.01133300  |
| H | 6.94358200  | -1.03591200 | -0.84928900 |
| H | 6.94360300  | -0.99207400 | 0.90484800  |
| C | 8.20598600  | 0.49392500  | -0.00999400 |
| H | 8.19869000  | 1.17210900  | 0.85018000  |
| H | 8.19819100  | 1.12867800  | -0.90269300 |
| C | 9.47813400  | -0.34988300 | 0.01052300  |
| H | 9.51656300  | -1.01603300 | -0.85537700 |
| H | 10.37483900 | 0.27271100  | -0.00562000 |
| H | 9.51760500  | -0.97179900 | 0.90866800  |

**TS65: OH + CH<sub>3</sub>(CH<sub>2</sub>)<sub>14</sub>CH<sub>3</sub> → H<sub>2</sub>O + CH<sub>2</sub>(CH<sub>2</sub>)<sub>14</sub>CH<sub>3</sub>**

|   |            |             |             |
|---|------------|-------------|-------------|
| C | 8.78596600 | 0.65332900  | -0.01129400 |
| H | 8.90539900 | 1.21612900  | 0.91646600  |
| H | 8.84105200 | 1.32821200  | -0.86827300 |
| H | 9.74436400 | -0.00494100 | -0.11588200 |
| C | 7.54852300 | -0.22271700 | -0.02705600 |
| H | 7.55438900 | -0.85046300 | -0.92370400 |
| H | 7.56041000 | -0.90230300 | 0.83245100  |
| C | 6.25851000 | 0.60113600  | 0.00644100  |

|   |              |             |             |
|---|--------------|-------------|-------------|
| H | 6.24129500   | 1.27663400  | −0.85688200 |
| H | 6.25727400   | 1.23876400  | 0.89843000  |
| C | 5.00015600   | −0.26392000 | −0.00180000 |
| H | 5.01454900   | −0.93423700 | 0.86607800  |
| H | 5.00902300   | −0.90777000 | −0.88941900 |
| C | 3.71272400   | 0.55681400  | 0.01456900  |
| H | 3.69945100   | 1.22588800  | −0.85430600 |
| H | 3.70570500   | 1.20293600  | 0.90078200  |
| C | 2.45163200   | −0.30391500 | 0.00727400  |
| H | 2.46214700   | −0.97045700 | 0.87821900  |
| H | 2.46063700   | −0.95265300 | −0.87700900 |
| C | 1.16509700   | 0.51826900  | 0.01643600  |
| H | 1.15548300   | 1.18474800  | −0.85458300 |
| H | 1.15621100   | 1.16738600  | 0.90051000  |
| C | −0.09734200  | −0.34037300 | 0.00808500  |
| H | −0.08918600  | −1.00568700 | 0.88003000  |
| H | −0.08760600  | −0.99060700 | −0.87514600 |
| C | −1.38318100  | 0.48292700  | 0.01379900  |
| H | −1.39072900  | 1.14843200  | −0.85800900 |
| H | −1.39308600  | 1.13310700  | 0.89709500  |
| C | −2.64628800  | −0.37472600 | 0.00433000  |
| H | −2.63945700  | −1.03969300 | 0.87656200  |
| H | −2.63594900  | −1.02542800 | −0.87856800 |
| C | −3.93183600  | 0.44903700  | 0.00833100  |
| H | −3.93842200  | 1.11414000  | −0.86379900 |
| H | −3.94238500  | 1.09964300  | 0.89130900  |
| C | −5.19505900  | −0.40844100 | −0.00181400 |
| H | −5.18863000  | −1.07347200 | 0.87036700  |
| H | −5.18434100  | −1.05915100 | −0.88469900 |
| C | −6.48082900  | 0.41504900  | 0.00170100  |
| H | −6.48730900  | 1.08023200  | −0.87039000 |
| H | −6.49195700  | 1.06555500  | 0.88476400  |
| C | −7.74357300  | −0.44280500 | −0.00901600 |
| H | −7.73775600  | −1.10846300 | 0.86289200  |
| H | −7.73309700  | −1.09356900 | −0.89206400 |
| C | −9.03094200  | 0.37871300  | −0.00550400 |
| H | −9.03544200  | 1.04290400  | −0.87662300 |
| H | −9.04051200  | 1.02747200  | 0.87714700  |
| C | −10.28338100 | −0.49437300 | −0.01704700 |
| H | −10.30945300 | −1.14708600 | 0.85955600  |
| H | −11.19436800 | 0.10745300  | −0.01453900 |
| H | −10.30404800 | −1.13144200 | −0.90525200 |
| O | 10.73591700  | −1.02283600 | −0.08287300 |

|                                                                                                                                                              |              |             |             |
|--------------------------------------------------------------------------------------------------------------------------------------------------------------|--------------|-------------|-------------|
| H                                                                                                                                                            | 10.38795100  | -1.50354700 | 0.68484100  |
| <b>OH-R66: OH + CH<sub>3</sub>(CH<sub>2</sub>)<sub>14</sub>CH<sub>3</sub> → H<sub>2</sub>O + CH<sub>3</sub>CH(CH<sub>2</sub>)<sub>13</sub>CH<sub>3</sub></b> |              |             |             |
| <b>CH<sub>3</sub>CH(CH<sub>2</sub>)<sub>13</sub>CH<sub>3</sub></b>                                                                                           |              |             |             |
| C                                                                                                                                                            | -9.64813900  | -0.19228500 | 0.16313600  |
| H                                                                                                                                                            | -9.63426600  | -0.88408200 | 1.01244400  |
| H                                                                                                                                                            | -9.93470000  | -0.78790600 | -0.71670000 |
| H                                                                                                                                                            | -10.44014900 | 0.53885300  | 0.33184100  |
| C                                                                                                                                                            | -8.32005500  | 0.45685800  | -0.02108300 |
| H                                                                                                                                                            | -8.27453800  | 1.47790900  | -0.38488100 |
| C                                                                                                                                                            | -7.07560300  | -0.36349500 | -0.05059900 |
| H                                                                                                                                                            | -7.06337300  | -0.99872900 | -0.95318700 |
| H                                                                                                                                                            | -7.08257100  | -1.06796400 | 0.79314600  |
| C                                                                                                                                                            | -5.79274700  | 0.46644500  | -0.01367800 |
| H                                                                                                                                                            | -5.79419800  | 1.08785500  | 0.88903300  |
| H                                                                                                                                                            | -5.78777100  | 1.15681900  | -0.86548900 |
| C                                                                                                                                                            | -4.52722900  | -0.38599200 | -0.04513700 |
| H                                                                                                                                                            | -4.53192400  | -1.01072200 | -0.94672800 |
| H                                                                                                                                                            | -4.53385100  | -1.07609100 | 0.80737900  |
| C                                                                                                                                                            | -3.24542900  | 0.44279200  | -0.01230900 |
| H                                                                                                                                                            | -3.24263100  | 1.07028600  | 0.88722100  |
| H                                                                                                                                                            | -3.23681700  | 1.13027900  | -0.86685300 |
| C                                                                                                                                                            | -1.97853600  | -0.40895900 | -0.03736800 |
| H                                                                                                                                                            | -1.98218100  | -1.03800400 | -0.93589500 |
| H                                                                                                                                                            | -1.98650800  | -1.09505600 | 0.81832000  |
| C                                                                                                                                                            | -0.69662200  | 0.41980700  | -0.00699100 |
| H                                                                                                                                                            | -0.69368700  | 1.04982100  | 0.89084700  |
| H                                                                                                                                                            | -0.68804900  | 1.10504100  | -0.86336900 |
| C                                                                                                                                                            | 0.57043700   | -0.43176800 | -0.02986600 |
| H                                                                                                                                                            | 0.56752300   | -1.06200700 | -0.92756000 |
| H                                                                                                                                                            | 0.56193800   | -1.11677200 | 0.82670400  |
| C                                                                                                                                                            | 1.85222400   | 0.39720600  | 0.00041200  |
| H                                                                                                                                                            | 1.85457700   | 1.02798500  | 0.89772700  |
| H                                                                                                                                                            | 1.86110000   | 1.08175800  | -0.85651400 |
| C                                                                                                                                                            | 3.11955500   | -0.45401100 | -0.02101600 |
| H                                                                                                                                                            | 3.11778800   | -1.08440400 | -0.91860400 |
| H                                                                                                                                                            | 3.11038500   | -1.13888400 | 0.83565200  |
| C                                                                                                                                                            | 4.40095900   | 0.37550300  | 0.01057800  |
| H                                                                                                                                                            | 4.40213900   | 1.00618600  | 0.90795700  |
| H                                                                                                                                                            | 4.41040000   | 1.06019200  | -0.84622300 |
| C                                                                                                                                                            | 5.66888800   | -0.47493000 | -0.00960600 |
| H                                                                                                                                                            | 5.66906800   | -1.10440700 | -0.90785200 |
| H                                                                                                                                                            | 5.65874100   | -1.16068400 | 0.84636800  |
| C                                                                                                                                                            | 6.94948900   | 0.35534700  | 0.02516000  |



|   |             |             |             |
|---|-------------|-------------|-------------|
| H | 6.94955500  | 0.98501800  | 0.92344200  |
| H | 6.96052500  | 1.04165000  | -0.83053600 |
| C | 8.21931500  | -0.49279800 | 0.00576600  |
| H | 8.21965900  | -1.11889000 | -0.89315800 |
| H | 8.20587800  | -1.17901500 | 0.85952700  |
| C | 9.48966600  | 0.35311800  | 0.04553800  |
| H | 9.51858700  | 0.96695300  | 0.94975500  |
| H | 10.38803000 | -0.26729200 | 0.03244400  |
| H | 9.53428400  | 1.02727700  | -0.81389200 |

**TS66: OH + CH<sub>3</sub>(CH<sub>2</sub>)<sub>14</sub>CH<sub>3</sub> → H<sub>2</sub>O + CH<sub>3</sub>CH(CH<sub>2</sub>)<sub>13</sub>CH<sub>3</sub>**

|   |             |             |             |
|---|-------------|-------------|-------------|
| C | 9.01785400  | -0.82930500 | -0.04696600 |
| H | 9.05667000  | -0.91701700 | -1.13508100 |
| H | 9.05044600  | -1.84008900 | 0.37215100  |
| H | 9.91100400  | -0.29696800 | 0.28349900  |
| C | 7.75007700  | -0.11679400 | 0.39030900  |
| H | 7.73356300  | 0.04180400  | 1.47367400  |
| H | 7.78770300  | 0.93908100  | -0.06858100 |
| C | 6.46129300  | -0.76674800 | -0.08258100 |
| H | 6.39921400  | -1.77672200 | 0.34532100  |
| H | 6.49926300  | -0.89343400 | -1.17062700 |
| C | 5.21134000  | 0.02366900  | 0.29605100  |
| H | 5.26445000  | 1.01414300  | -0.17100800 |
| H | 5.19947500  | 0.18584200  | 1.38132500  |
| C | 3.91625300  | -0.66682500 | -0.12319500 |
| H | 3.86180300  | -1.65483200 | 0.35016100  |
| H | 3.93487300  | -0.84433500 | -1.20514200 |
| C | 2.66604000  | 0.13295500  | 0.23514700  |
| H | 2.70924400  | 1.11214000  | -0.25704700 |
| H | 2.65857700  | 0.33036100  | 1.31412700  |
| C | 1.37099900  | -0.57439600 | -0.15590100 |
| H | 1.32473800  | -1.54774800 | 0.34774700  |
| H | 1.38381400  | -0.78574000 | -1.23202900 |
| C | 0.11807100  | 0.22877000  | 0.18496300  |
| H | 0.15162300  | 1.19247800  | -0.33758900 |
| H | 0.11589500  | 0.45996000  | 1.25722200  |
| C | -1.17504300 | -0.49822000 | -0.17579100 |
| H | -1.21094400 | -1.45637400 | 0.35688700  |
| H | -1.16822300 | -0.74153000 | -1.24531200 |
| C | -2.43102000 | 0.30631800  | 0.15008400  |
| H | -2.40599600 | 1.25602300  | -0.39792500 |
| H | -2.42917200 | 0.56591700  | 1.21587000  |
| C | -3.72184400 | -0.43701200 | -0.18489500 |

|   |              |             |             |
|---|--------------|-------------|-------------|
| H | -3.74825200  | -1.38258300 | 0.37027500  |
| H | -3.72031100  | -0.70525200 | -1.24853500 |
| C | -4.98048900  | 0.36750300  | 0.13038000  |
| H | -4.96149500  | 1.30726600  | -0.43474700 |
| H | -4.97643900  | 0.64645200  | 1.19128400  |
| C | -6.26939300  | -0.38676500 | -0.18731400 |
| H | -6.28898200  | -1.32430600 | 0.38159500  |
| H | -6.27162600  | -0.67029800 | -1.24702900 |
| C | -7.52977200  | 0.41686100  | 0.12220500  |
| H | -7.51426200  | 1.35229100  | -0.45052100 |
| H | -7.52630600  | 0.70503900  | 1.18081600  |
| C | -8.81851900  | -0.34126500 | -0.18816600 |
| H | -8.83299000  | -1.27430700 | 0.38559000  |
| H | -8.82024300  | -0.62927100 | -1.24522500 |
| C | -10.07008700 | 0.47493800  | 0.12491500  |
| H | -10.08569300 | 1.40043600  | -0.45675000 |
| H | -10.98134500 | -0.08070600 | -0.10512400 |
| H | -10.10135400 | 0.74818200  | 1.18306400  |
| O | 7.70749800   | 2.35774200  | -0.52230500 |
| H | 7.24673200   | 2.70006200  | 0.26062100  |

**OH-R67: OH + CH<sub>3</sub>(CH<sub>2</sub>)<sub>14</sub>CH<sub>3</sub> → H<sub>2</sub>O + CH<sub>3</sub>CH<sub>2</sub>CH(CH<sub>2</sub>)<sub>12</sub>CH<sub>3</sub>  
CH<sub>3</sub>CH<sub>2</sub>CH(CH<sub>2</sub>)<sub>12</sub>CH<sub>3</sub>**

|   |             |             |             |
|---|-------------|-------------|-------------|
| C | 9.53270400  | 0.56146600  | 0.17419800  |
| H | 9.38224900  | 1.29599500  | 0.96865100  |
| H | 9.61784000  | 1.10380800  | -0.77069800 |
| H | 10.48076300 | 0.05234200  | 0.35625900  |
| C | 8.36755200  | -0.42497900 | 0.12492100  |
| H | 8.55904100  | -1.17713900 | -0.65772000 |
| H | 8.32027200  | -0.99606500 | 1.06179300  |
| C | 7.05124800  | 0.23195900  | -0.11866800 |
| H | 7.03733600  | 1.22263700  | -0.56557200 |
| C | 5.78426500  | -0.55251700 | -0.08380200 |
| H | 5.78521800  | -1.21188600 | 0.79523800  |
| H | 5.73777800  | -1.23209700 | -0.95224900 |
| C | 4.52622100  | 0.31596800  | -0.07077700 |
| H | 4.53250500  | 0.96956800  | -0.95113700 |
| H | 4.55440500  | 0.97466500  | 0.80459400  |
| C | 3.23661900  | -0.50005500 | -0.05545800 |
| H | 3.23339600  | -1.15702200 | 0.82288500  |
| H | 3.21390200  | -1.15861900 | -0.93238400 |
| C | 1.97901500  | 0.36554600  | -0.04206100 |
| H | 1.98283700  | 1.02365400  | -0.91948200 |

|   |              |             |             |
|---|--------------|-------------|-------------|
| H | 2.00033000   | 1.02283000  | 0.83566700  |
| C | 0.68893500   | -0.45097800 | -0.02970700 |
| H | 0.68508400   | -1.10886000 | 0.84790500  |
| H | 0.66872600   | -1.10879900 | -0.90717400 |
| C | -0.56996400  | 0.41283400  | -0.01797400 |
| H | -0.56558500  | 1.07161000  | -0.89491200 |
| H | -0.55116500  | 1.06962200  | 0.86025900  |
| C | -1.85895600  | -0.40543500 | -0.00842800 |
| H | -1.86340300  | -1.06393500 | 0.86872800  |
| H | -1.87663700  | -1.06274500 | -0.88633200 |
| C | -3.11927600  | 0.45633900  | 0.00161600  |
| H | -3.11467000  | 1.11541600  | -0.87509600 |
| H | -3.10290600  | 1.11287700  | 0.88009300  |
| C | -4.40686500  | -0.36417100 | 0.00899500  |
| H | -4.41139200  | -1.02300100 | 0.88589600  |
| H | -4.42217300  | -1.02122300 | -0.86913100 |
| C | -5.66887800  | 0.49520500  | 0.01759400  |
| H | -5.66453600  | 1.15438300  | -0.85906300 |
| H | -5.65481100  | 1.15168400  | 0.89617800  |
| C | -6.95475900  | -0.32765900 | 0.02342300  |
| H | -6.95984100  | -0.98677400 | 0.90030500  |
| H | -6.96856700  | -0.98507200 | -0.85465000 |
| C | -8.21954300  | 0.52816600  | 0.03052200  |
| H | -8.21341100  | 1.18567300  | -0.84564300 |
| H | -8.20532500  | 1.18350500  | 0.90822500  |
| C | -9.49466900  | -0.31157200 | 0.03539900  |
| H | -9.53099700  | -0.95639200 | 0.91749400  |
| H | -10.38969000 | 0.31375600  | 0.03963200  |
| H | -9.53847700  | -0.95508100 | -0.84732000 |

**TS67: OH + CH<sub>3</sub>(CH<sub>2</sub>)<sub>14</sub>CH<sub>3</sub> → H<sub>2</sub>O + CH<sub>3</sub>CH<sub>2</sub>CH(CH<sub>2</sub>)<sub>12</sub>CH<sub>3</sub>**

|   |            |             |             |
|---|------------|-------------|-------------|
| C | 9.08464800 | -0.02786900 | 0.22247300  |
| H | 9.15764900 | 0.00329300  | 1.31292100  |
| H | 9.04655500 | 1.00151600  | -0.14164600 |
| H | 9.99385400 | -0.49392700 | -0.16141700 |
| C | 7.83697400 | -0.78987500 | -0.21626000 |
| H | 7.80128900 | -0.85126200 | -1.30870100 |
| H | 7.87597000 | -1.82230200 | 0.15279100  |
| C | 6.55702100 | -0.14076000 | 0.28337200  |
| H | 6.55670700 | 0.92709300  | -0.14483100 |
| H | 6.57945500 | -0.01428900 | 1.37244900  |
| C | 5.26667900 | -0.80364000 | -0.16527400 |
| H | 5.23313900 | -1.82451100 | 0.23846400  |

|   |              |             |             |
|---|--------------|-------------|-------------|
| H | 5.27153800   | -0.90128600 | -1.25683600 |
| C | 4.01913700   | -0.04009700 | 0.27272500  |
| H | 4.05650200   | 0.96941000  | -0.15353100 |
| H | 4.03040800   | 0.07824400  | 1.36356200  |
| C | 2.71857200   | -0.71994200 | -0.14675100 |
| H | 2.68069600   | -1.72968800 | 0.27991400  |
| H | 2.71148000   | -0.84529300 | -1.23615500 |
| C | 1.47498900   | 0.05602300  | 0.28012600  |
| H | 1.51579400   | 1.06546500  | -0.14692900 |
| H | 1.48247400   | 0.18267400  | 1.36967900  |
| C | 0.17086000   | -0.61663900 | -0.14053600 |
| H | 0.12497500   | -1.62384700 | 0.29137200  |
| H | 0.16655500   | -0.74873200 | -1.22930900 |
| C | -1.06988500  | 0.16911900  | 0.27685100  |
| H | -1.02030700  | 1.17694400  | -0.15327500 |
| H | -1.06710200  | 0.29992300  | 1.36587800  |
| C | -2.37638900  | -0.49615200 | -0.14816600 |
| H | -2.43061700  | -1.50205700 | 0.28584000  |
| H | -2.37673300  | -0.63095400 | -1.23665800 |
| C | -3.61423300  | 0.29812700  | 0.26178500  |
| H | -3.55612100  | 1.30507000  | -0.16939400 |
| H | -3.61602700  | 0.43044800  | 1.35061700  |
| C | -4.92266300  | -0.35962400 | -0.16889500 |
| H | -4.98463200  | -1.36503000 | 0.26525200  |
| H | -4.91891800  | -0.49499400 | -1.25731400 |
| C | -6.15813200  | 0.44150900  | 0.23505300  |
| H | -6.09292900  | 1.44789900  | -0.19646100 |
| H | -6.16411100  | 0.57445600  | 1.32380700  |
| C | -7.46769200  | -0.20994400 | -0.20101700 |
| H | -7.53714300  | -1.21496700 | 0.23330400  |
| H | -7.46056700  | -0.34641600 | -1.28945200 |
| C | -8.70260500  | 0.59594200  | 0.19620200  |
| H | -8.63000000  | 1.59968600  | -0.23675600 |
| H | -8.71021200  | 0.72962500  | 1.28345000  |
| C | -10.00400400 | -0.06481600 | -0.25060100 |
| H | -10.10989200 | -1.05736200 | 0.19542800  |
| H | -10.87569800 | 0.52637100  | 0.03727400  |
| H | -10.02507400 | -0.18637900 | -1.33684500 |
| O | 6.53177800   | 2.35784100  | -0.60338400 |
| H | 6.15715000   | 2.72429600  | 0.21404500  |

**OH-R68:**  $\text{HO}_2 + \text{CH}_3(\text{CH}_2)_{14}\text{CH}_3 \rightarrow \text{H}_2\text{O}_2 + \text{CH}_3(\text{CH}_2)_2\text{CH}(\text{CH}_2)_{11}\text{CH}_3$   
 $\text{CH}_3(\text{CH}_2)_2\text{CH}(\text{CH}_2)_{11}\text{CH}_3$

|   |             |             |             |
|---|-------------|-------------|-------------|
| C | 9.58606000  | -0.04672400 | 0.33827500  |
| H | 9.58803200  | 0.57321300  | 1.23878200  |
| H | 9.84849900  | 0.59500500  | -0.50703400 |
| H | 10.37214300 | -0.79652900 | 0.44668500  |
| C | 8.22022900  | -0.69343100 | 0.12720500  |
| H | 8.24195200  | -1.32327800 | -0.76844300 |
| H | 7.98540200  | -1.35520600 | 0.96679400  |
| C | 7.09915900  | 0.33660500  | -0.01856200 |
| H | 7.34898000  | 1.01585500  | -0.85204600 |
| H | 7.07142900  | 0.97720500  | 0.87385000  |
| C | 5.75705800  | -0.27336900 | -0.23754200 |
| H | 5.70447900  | -1.25019700 | -0.71177500 |
| C | 4.51073300  | 0.54008700  | -0.15196600 |
| H | 4.46395800  | 1.25138700  | -0.99459900 |
| H | 4.54134200  | 1.16700700  | 0.74993600  |
| C | 3.23524700  | -0.30273000 | -0.14755600 |
| H | 3.26574300  | -0.99243300 | 0.70355900  |
| H | 3.21518400  | -0.92538400 | -1.04991800 |
| C | 1.96030500  | 0.53339800  | -0.08227200 |
| H | 1.93399100  | 1.22264200  | -0.93515000 |
| H | 1.98023400  | 1.15874400  | 0.81862400  |
| C | 0.69119100  | -0.31545500 | -0.07993800 |
| H | 0.71616200  | -1.00154100 | 0.77536600  |
| H | 0.67608200  | -0.94478800 | -0.97814700 |
| C | -0.58991500 | 0.51314400  | -0.02417800 |
| H | -0.61471400 | 1.19975300  | -0.87914500 |
| H | -0.57779900 | 1.14139900  | 0.87478700  |
| C | -1.85523100 | -0.34140500 | -0.02654500 |
| H | -1.83210700 | -1.02525300 | 0.83067400  |
| H | -1.86302400 | -0.97308700 | -0.92320700 |
| C | -3.13991700 | 0.48222200  | 0.02021700  |
| H | -3.16239400 | 1.16689500  | -0.83636800 |
| H | -3.13491100 | 1.11258200  | 0.91778600  |
| C | -4.40244400 | -0.37640300 | 0.01278100  |
| H | -4.38162600 | -1.05887200 | 0.87115400  |
| H | -4.40409500 | -1.00942200 | -0.88295600 |
| C | -5.68959800 | 0.44385900  | 0.05206100  |
| H | -5.70968000 | 1.12721600  | -0.80565300 |
| H | -5.69023700 | 1.07562200  | 0.94868200  |
| C | -6.95014800 | -0.41726300 | 0.04009700  |
| H | -6.93239800 | -1.09918500 | 0.89917700  |
| H | -6.94782200 | -1.05141900 | -0.85502000 |
| C | -8.23984900 | 0.39982300  | 0.07345000  |

|   |              |             |             |
|---|--------------|-------------|-------------|
| H | -8.25558000  | 1.08071700  | -0.78452700 |
| H | -8.24226500  | 1.03141200  | 0.96851700  |
| C | -9.48961500  | -0.47703500 | 0.05772600  |
| H | -9.50636200  | -1.14477600 | 0.92312300  |
| H | -10.40246100 | 0.12163500  | 0.07807000  |
| H | -9.51572200  | -1.09885200 | -0.84110000 |

**TS68: HO<sub>2</sub> + CH<sub>3</sub>(CH<sub>2</sub>)<sub>14</sub>CH<sub>3</sub> → H<sub>2</sub>O<sub>2</sub> + CH<sub>3</sub>(CH<sub>2</sub>)<sub>2</sub>CH(CH<sub>2</sub>)<sub>11</sub>CH<sub>3</sub>**

|   |             |             |             |
|---|-------------|-------------|-------------|
| C | 9.18574800  | -0.48587700 | -0.23090800 |
| H | 9.18489700  | -0.58695900 | -1.31924500 |
| H | 9.30688100  | -1.48520700 | 0.19562700  |
| H | 10.05906600 | 0.10623500  | 0.04939900  |
| C | 7.89094000  | 0.16077000  | 0.25321500  |
| H | 7.91824900  | 0.27319600  | 1.34301700  |
| H | 7.79879200  | 1.16826000  | -0.16570100 |
| C | 6.65269200  | -0.64373200 | -0.13661700 |
| H | 6.73217400  | -1.65995500 | 0.27295900  |
| H | 6.61563300  | -0.75093900 | -1.22687300 |
| C | 5.35743600  | -0.01729400 | 0.34880500  |
| H | 5.30773600  | 1.04024200  | -0.10221700 |
| H | 5.37320300  | 0.13146400  | 1.43510800  |
| C | 4.08416900  | -0.72266100 | -0.08656600 |
| H | 4.08749000  | -1.74404500 | 0.31738500  |
| H | 4.08366700  | -0.82098000 | -1.17818500 |
| C | 2.81872300  | 0.00475800  | 0.36098500  |
| H | 2.84311700  | 1.02726700  | -0.03271900 |
| H | 2.81791100  | 0.09172000  | 1.45461300  |
| C | 1.53608500  | -0.68775800 | -0.09165600 |
| H | 1.50847800  | -1.70810500 | 0.31011400  |
| H | 1.54531500  | -0.78683300 | -1.18385900 |
| C | 0.27459800  | 0.05902500  | 0.33465200  |
| H | 0.30849400  | 1.07926100  | -0.06618300 |
| H | 0.26295700  | 0.15852000  | 1.42698200  |
| C | -1.01337600 | -0.61969500 | -0.12430400 |
| H | -1.05632000 | -1.63600200 | 0.28604700  |
| H | -0.99571000 | -0.72930500 | -1.21550700 |
| C | -2.27023900 | 0.14459800  | 0.28463200  |
| H | -2.22207400 | 1.16160200  | -0.12338500 |
| H | -2.29023400 | 0.25271000  | 1.37600300  |
| C | -3.56167600 | -0.52333600 | -0.18031900 |
| H | -3.61643700 | -1.53772400 | 0.23336700  |
| H | -3.53822600 | -0.63727200 | -1.27099800 |
| C | -4.81435800 | 0.25321600  | 0.21838100  |

|   |              |             |             |
|---|--------------|-------------|-------------|
| H | -4.75522800  | 1.26864700  | -0.19217500 |
| H | -4.84011200  | 0.36457800  | 1.30929700  |
| C | -6.10834300  | -0.40562400 | -0.25247800 |
| H | -6.17146000  | -1.41978100 | 0.16065000  |
| H | -6.08096800  | -0.51948000 | -1.34310600 |
| C | -7.35793100  | 0.37811100  | 0.14118600  |
| H | -7.29204900  | 1.39392100  | -0.26784500 |
| H | -7.38875200  | 0.48869300  | 1.23221600  |
| C | -8.65429500  | -0.27243100 | -0.33558200 |
| H | -8.71985100  | -1.28666600 | 0.07319700  |
| H | -8.62225500  | -0.38100700 | -1.42521500 |
| C | -9.89260300  | 0.52515200  | 0.06613700  |
| H | -9.85544300  | 1.53531200  | -0.35026300 |
| H | -10.81031600 | 0.05052100  | -0.28683100 |
| H | -9.95931300  | 0.61774900  | 1.15348200  |
| O | 5.27052300   | 2.46656300  | -0.57143100 |
| H | 5.53108000   | 2.86452000  | 0.27491400  |

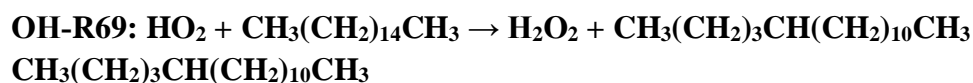

|   |             |             |             |
|---|-------------|-------------|-------------|
| C | 9.42423900  | 0.86641100  | 0.38212100  |
| H | 9.20595800  | 1.75009100  | 0.98761100  |
| H | 9.57044400  | 1.19959200  | -0.64874700 |
| H | 10.36671500 | 0.44277800  | 0.73472100  |
| C | 8.28417500  | -0.14492500 | 0.46957300  |
| H | 8.52971300  | -1.03100800 | -0.12617300 |
| H | 8.17525300  | -0.48969300 | 1.50367300  |
| C | 6.95407500  | 0.43072900  | -0.00895100 |
| H | 7.05866000  | 0.77518200  | -1.04482200 |
| H | 6.70316400  | 1.31598900  | 0.58676500  |
| C | 5.80085600  | -0.56890600 | 0.07341900  |
| H | 5.70218800  | -0.93213200 | 1.10577700  |
| H | 6.06114500  | -1.46182900 | -0.52080500 |
| C | 4.49586300  | -0.01101300 | -0.38283200 |
| H | 4.50349700  | 0.79358000  | -1.11369600 |
| C | 3.21736400  | -0.73881100 | -0.14149400 |
| H | 3.20171200  | -1.11713600 | 0.88990400  |
| H | 3.16676500  | -1.63877900 | -0.77850900 |
| C | 1.97348600  | 0.11385700  | -0.39147800 |
| H | 1.98937200  | 0.47908400  | -1.42523400 |
| H | 2.01422100  | 1.00102800  | 0.25079500  |
| C | 0.67012600  | -0.63849100 | -0.13848100 |
| H | 0.66890300  | -1.02411900 | 0.88843500  |

|   |              |             |             |
|---|--------------|-------------|-------------|
| H | 0.62164300   | -1.51510800 | -0.79610200 |
| C | -0.57011000  | 0.22579700  | -0.35046000 |
| H | -0.57195200  | 0.61531700  | -1.37575500 |
| H | -0.51713200  | 1.10000300  | 0.30994900  |
| C | -1.87636700  | -0.52055900 | -0.09043100 |
| H | -1.85557300  | -0.94243700 | 0.92191600  |
| H | -1.95209900  | -1.37238000 | -0.77717200 |
| C | -3.11151900  | 0.36436400  | -0.23905700 |
| H | -3.13149500  | 0.79677500  | -1.24688900 |
| H | -3.03399800  | 1.20920200  | 0.45619500  |
| C | -4.41996900  | -0.37904100 | 0.01839600  |
| H | -4.38107100  | -0.84542400 | 1.01050900  |
| H | -4.52118900  | -1.19876400 | -0.70312000 |
| C | -5.64859600  | 0.52379700  | -0.06402500 |
| H | -5.68611400  | 0.99919800  | -1.05186600 |
| H | -5.54679400  | 1.33710600  | 0.66481300  |
| C | -6.95845500  | -0.21799100 | 0.18954800  |
| H | -6.91115700  | -0.71280600 | 1.16757500  |
| H | -7.07454800  | -1.01674300 | -0.55322600 |
| C | -8.18395600  | 0.69226700  | 0.14608200  |
| H | -8.22927000  | 1.18930100  | -0.82917000 |
| H | -8.06661600  | 1.48622400  | 0.89162200  |
| C | -9.48555400  | -0.06422000 | 0.39912800  |
| H | -9.46852400  | -0.54967200 | 1.37855200  |
| H | -10.35098600 | 0.60078700  | 0.36979100  |
| H | -9.63477900  | -0.84279800 | -0.35365900 |

**TS69: HO<sub>2</sub> + CH<sub>3</sub>(CH<sub>2</sub>)<sub>14</sub>CH<sub>3</sub> → H<sub>2</sub>O<sub>2</sub> + CH<sub>3</sub>(CH<sub>2</sub>)<sub>3</sub>CH(CH<sub>2</sub>)<sub>10</sub>CH<sub>3</sub>**

|   |              |             |             |
|---|--------------|-------------|-------------|
| C | -9.24264800  | 0.17355600  | 0.11533300  |
| H | -9.19556300  | 1.19924900  | -0.25951300 |
| H | -9.33119600  | 0.22199800  | 1.20398500  |
| H | -10.15335200 | -0.28499800 | -0.27489900 |
| C | -7.99751000  | -0.60906700 | -0.29420900 |
| H | -8.07062300  | -1.63872800 | 0.07299500  |
| H | -7.94510200  | -0.67324000 | -1.38646500 |
| C | -6.71157800  | 0.02472600  | 0.23045900  |
| H | -6.76045400  | 0.09054000  | 1.32466300  |
| H | -6.63146900  | 1.05310600  | -0.14030500 |
| C | -5.45592700  | -0.74358800 | -0.17429700 |
| H | -5.41389900  | -0.82738900 | -1.26643900 |
| H | -5.50884300  | -1.76964300 | 0.21431600  |
| C | -4.17660100  | -0.09303800 | 0.32360100  |
| H | -4.20243500  | 0.04733900  | 1.41076700  |



|   |             |             |             |
|---|-------------|-------------|-------------|
| H | -4.16598800 | 0.96895700  | -0.11927200 |
| C | -2.88648100 | -0.76621800 | -0.11128500 |
| H | -2.88603000 | -0.87325100 | -1.20197600 |
| H | -2.85961100 | -1.78372400 | 0.30131900  |
| C | -1.63858800 | -0.00299400 | 0.32607700  |
| H | -1.64761800 | 0.11347800  | 1.41710800  |
| H | -1.67814500 | 1.00717900  | -0.09820900 |
| C | -0.33822700 | -0.67999600 | -0.09852400 |
| H | -0.33704300 | -0.80780900 | -1.18768200 |
| H | -0.29366200 | -1.68856400 | 0.33030400  |
| C | 0.90463500  | 0.10271200  | 0.31816600  |
| H | 0.90621800  | 0.22856100  | 1.40784100  |
| H | 0.85352000  | 1.11218500  | -0.10770200 |
| C | 2.20909100  | -0.56094600 | -0.11540700 |
| H | 2.20331900  | -0.69286100 | -1.20420600 |
| H | 2.26673200  | -1.56784300 | 0.31583800  |
| C | 3.44831300  | 0.23396200  | 0.28911200  |
| H | 3.45756700  | 0.36230400  | 1.37840300  |
| H | 3.38511400  | 1.24230300  | -0.13803900 |
| C | 4.75497300  | -0.41927200 | -0.15357600 |
| H | 4.74264100  | -0.55219900 | -1.24223600 |
| H | 4.82352400  | -1.42542100 | 0.27783900  |
| C | 5.99124900  | 0.38492000  | 0.24175400  |
| H | 6.00647000  | 0.51477000  | 1.33081000  |
| H | 5.91865800  | 1.39228200  | -0.18629200 |
| C | 7.29915200  | -0.26051600 | -0.20796200 |
| H | 7.28293100  | -0.39353900 | -1.29673500 |
| H | 7.37598400  | -1.26664500 | 0.22254300  |
| C | 8.53463100  | 0.54854300  | 0.18098900  |
| H | 8.55117200  | 0.67895900  | 1.26854700  |
| H | 8.45475400  | 1.55330500  | -0.24829900 |
| C | 9.83439800  | -0.10626800 | -0.27911100 |
| H | 9.84682000  | -0.22385900 | -1.36591600 |
| H | 10.70652600 | 0.48670700  | 0.00371000  |
| H | 9.94713700  | -1.10005600 | 0.16246800  |
| O | -4.12470800 | 2.39522200  | -0.58967600 |
| H | -3.82368200 | 2.77569000  | 0.25141300  |

**OH-R70:  $\text{HO}_2 + \text{CH}_3(\text{CH}_2)_{14}\text{CH}_3 \rightarrow \text{H}_2\text{O}_2 + \text{CH}_3(\text{CH}_2)_4\text{CH}(\text{CH}_2)_9\text{CH}_3$**   
 **$\text{CH}_3(\text{CH}_2)_4\text{CH}(\text{CH}_2)_9\text{CH}_3$**

|   |            |             |             |
|---|------------|-------------|-------------|
| C | 9.57124400 | -0.00762900 | 0.26349100  |
| H | 9.60401300 | 0.50356700  | 1.22924400  |
| H | 9.72976700 | 0.74411400  | -0.51429100 |

|   |             |             |             |
|---|-------------|-------------|-------------|
| H | 10.40725600 | -0.70885300 | 0.22720500  |
| C | 8.23304800  | -0.71568800 | 0.06841200  |
| H | 8.23278200  | -1.24736800 | -0.88937400 |
| H | 8.10119300  | -1.47825600 | 0.84368900  |
| C | 7.04870400  | 0.24741300  | 0.10620500  |
| H | 7.17882000  | 1.01001300  | -0.67163900 |
| H | 7.04874700  | 0.78306100  | 1.06354500  |
| C | 5.70372800  | -0.44707400 | -0.08524800 |
| H | 5.56546400  | -1.20152200 | 0.69763500  |
| H | 5.70611400  | -0.98770700 | -1.03917900 |
| C | 4.52074000  | 0.51971900  | -0.06249500 |
| H | 4.66922300  | 1.28484600  | -0.84362200 |
| H | 4.52081700  | 1.07890400  | 0.88431700  |
| C | 3.19987100  | -0.14595000 | -0.24748400 |
| H | 3.17183300  | -1.13615400 | -0.69443900 |
| C | 1.93021800  | 0.62881600  | -0.14922700 |
| H | 1.85406300  | 1.33412600  | -0.99479300 |
| H | 1.95388500  | 1.26244200  | 0.74850600  |
| C | 0.67789800  | -0.24728400 | -0.12457100 |
| H | 0.73019400  | -0.92429000 | 0.73564000  |
| H | 0.66772800  | -0.88220800 | -1.01848700 |
| C | -0.61583800 | 0.55987700  | -0.06348200 |
| H | -0.66131600 | 1.23598500  | -0.92609500 |
| H | -0.60443000 | 1.19897700  | 0.82787000  |
| C | -1.86760700 | -0.31393300 | -0.04192400 |
| H | -1.82874000 | -0.98297200 | 0.82627500  |
| H | -1.87289100 | -0.96013100 | -0.92816700 |
| C | -3.16268300 | 0.49361600  | 0.00027900  |
| H | -3.19944500 | 1.16292400  | -0.86793600 |
| H | -3.15889700 | 1.13975500  | 0.88656300  |
| C | -4.41522600 | -0.37924400 | 0.01706900  |
| H | -4.38305700 | -1.04391500 | 0.88895400  |
| H | -4.41467300 | -1.03005100 | -0.86581600 |
| C | -5.71039200 | 0.42884000  | 0.04618600  |
| H | -5.74103500 | 1.09411700  | -0.82536500 |
| H | -5.71249200 | 1.07907800  | 0.92950300  |
| C | -6.96306000 | -0.44360400 | 0.05869000  |
| H | -6.93601600 | -1.10638800 | 0.93239900  |
| H | -6.95901300 | -1.09703100 | -0.82244100 |
| C | -8.25947700 | 0.36327000  | 0.07970300  |
| H | -8.28459000 | 1.02440100  | -0.79342000 |
| H | -8.26287000 | 1.01498800  | 0.96021800  |
| C | -9.50212800 | -0.52365500 | 0.09024600  |

|   |              |             |             |
|---|--------------|-------------|-------------|
| H | -9.50927100  | -1.17171800 | 0.97065200  |
| H | -10.41957700 | 0.06816300  | 0.10188300  |
| H | -9.52781800  | -1.16583200 | -0.79413800 |

**TS70: HO<sub>2</sub> + CH<sub>3</sub>(CH<sub>2</sub>)<sub>14</sub>CH<sub>3</sub> → H<sub>2</sub>O<sub>2</sub> + CH<sub>3</sub>(CH<sub>2</sub>)<sub>4</sub>CH(CH<sub>2</sub>)<sub>9</sub>CH<sub>3</sub>**

|   |              |             |             |
|---|--------------|-------------|-------------|
| C | -9.34449600  | -0.32829200 | -0.27416400 |
| H | -9.46887700  | -1.32410600 | 0.15965600  |
| H | -9.34514500  | -0.43842800 | -1.36175400 |
| H | -10.21566400 | 0.26881300  | 0.00267100  |
| C | -8.04589400  | 0.31490100  | 0.20507400  |
| H | -7.95330600  | 1.32090500  | -0.21845400 |
| H | -8.07457300  | 0.43955300  | 1.29315900  |
| C | -6.81181300  | -0.50104800 | -0.17361500 |
| H | -6.78285100  | -0.62731000 | -1.26274500 |
| H | -6.90052200  | -1.50881900 | 0.25074600  |
| C | -5.50632700  | 0.13559800  | 0.29451100  |
| H | -5.53216600  | 0.25647100  | 1.38485100  |
| H | -5.41841600  | 1.14197200  | -0.13161300 |
| C | -4.26980100  | -0.67109100 | -0.09500400 |
| H | -4.23622900  | -0.78566400 | -1.18445700 |
| H | -4.34526600  | -1.68425000 | 0.32240200  |
| C | -2.97389100  | -0.03809100 | 0.38053600  |
| H | -2.98365200  | 0.11537100  | 1.46619700  |
| H | -2.93028200  | 1.01773000  | -0.07487800 |
| C | -1.69996100  | -0.73882700 | -0.06033700 |
| H | -1.70731400  | -0.84336100 | -1.15137200 |
| H | -1.69339300  | -1.75784800 | 0.34950300  |
| C | -0.43594100  | -0.00007300 | 0.37279300  |
| H | -0.42457000  | 0.08928400  | 1.46615500  |
| H | -0.47326900  | 1.02138500  | -0.02264400 |
| C | 0.84791500   | -0.68208600 | -0.09201600 |
| H | 0.82774900   | -0.78386700 | -1.18384400 |
| H | 0.88965900   | -1.70115100 | 0.31184900  |
| C | 2.10692000   | 0.07766700  | 0.31863700  |
| H | 2.13088600   | 0.17770700  | 1.41073300  |
| H | 2.05763000   | 1.09733400  | -0.08208200 |
| C | 3.39595400   | -0.58807500 | -0.15595600 |
| H | 3.36660100   | -0.69700900 | -1.24699700 |
| H | 3.45360900   | -1.60424000 | 0.25299700  |
| C | 4.65021700   | 0.18783200  | 0.23900100  |
| H | 4.68239900   | 0.29442600  | 1.33024700  |
| H | 4.58748000   | 1.20491700  | -0.16681300 |
| C | 5.94209200   | -0.46732800 | -0.24266300 |

|   |             |             |             |
|---|-------------|-------------|-------------|
| H | 5.90714800  | -0.57833100 | -1.33338100 |
| H | 6.01023700  | -1.48241400 | 0.16738600  |
| C | 7.19278100  | 0.31815800  | 0.14395500  |
| H | 7.23141300  | 0.42599000  | 1.23503700  |
| H | 7.12154900  | 1.33483100  | -0.26199800 |
| C | 8.48710300  | -0.32801900 | -0.34417300 |
| H | 8.44678000  | -0.43451800 | -1.43375300 |
| H | 8.55857100  | -1.34285200 | 0.06212700  |
| C | 9.72632700  | 0.47224000  | 0.04932300  |
| H | 9.80157900  | 0.56271200  | 1.13630300  |
| H | 10.64254300 | 0.00111500  | -0.31211300 |
| H | 9.68283300  | 1.48315600  | -0.36462300 |
| O | -2.90887900 | 2.43991400  | -0.55953700 |
| H | -3.20925400 | 2.84039600  | 0.27238400  |

**OH-R71:  $\text{HO}_2 + \text{CH}_3(\text{CH}_2)_{14}\text{CH}_3 \rightarrow \text{H}_2\text{O}_2 + \text{CH}_3(\text{CH}_2)_5\text{CH}(\text{CH}_2)_8\text{CH}_3$**   
 **$\text{CH}_3(\text{CH}_2)_5\text{CH}(\text{CH}_2)_8\text{CH}_3$**

|   |             |             |             |
|---|-------------|-------------|-------------|
| C | 9.45274400  | 0.80800300  | 0.26566600  |
| H | 9.32145300  | 1.67387800  | 0.91988700  |
| H | 9.54558400  | 1.17801000  | -0.75877000 |
| H | 10.39422800 | 0.32479400  | 0.53407100  |
| C | 8.27154200  | -0.15107300 | 0.39134800  |
| H | 8.43365400  | -1.02287400 | -0.25174300 |
| H | 8.21211700  | -0.53136700 | 1.41687400  |
| C | 6.94220000  | 0.50369300  | 0.02232000  |
| H | 7.00068500  | 0.88684000  | -1.00382200 |
| H | 6.77797900  | 1.37607900  | 0.66656600  |
| C | 5.75071900  | -0.44335800 | 0.14090200  |
| H | 5.69525300  | -0.82865700 | 1.16631300  |
| H | 5.91388300  | -1.31376800 | -0.50627600 |
| C | 4.42330700  | 0.21595400  | -0.22300700 |
| H | 4.47696400  | 0.60046400  | -1.24838200 |
| H | 4.25474300  | 1.08369500  | 0.42466100  |
| C | 3.22998200  | -0.73245800 | -0.10648100 |
| H | 3.17565700  | -1.13161200 | 0.91578900  |
| H | 3.41082900  | -1.61182800 | -0.74838100 |
| C | 1.92862100  | -0.09795200 | -0.46177400 |
| H | 1.93376800  | 0.74172000  | -1.15187800 |
| C | 0.63381700  | -0.78620200 | -0.19337800 |
| H | 0.65573600  | -1.22924700 | 0.81155300  |
| H | 0.50836400  | -1.63978300 | -0.88169700 |
| C | -0.58249200 | 0.13144200  | -0.32212300 |
| H | -0.59564200 | 0.57051000  | -1.32671800 |

|   |              |             |             |
|---|--------------|-------------|-------------|
| H | -0.47580300  | 0.96656000  | 0.37928800  |
| C | -1.90469400  | -0.58642800 | -0.06592500 |
| H | -1.88681100  | -1.03407000 | 0.93521200  |
| H | -2.00928600  | -1.41836700 | -0.77300400 |
| C | -3.11782500  | 0.33293900  | -0.18516300 |
| H | -3.13353000  | 0.78407600  | -1.18471600 |
| H | -3.01447800  | 1.16246200  | 0.52472300  |
| C | -4.44248000  | -0.38369300 | 0.06560500  |
| H | -4.42579500  | -0.83773800 | 1.06382400  |
| H | -4.54738900  | -1.21110500 | -0.64660500 |
| C | -5.65477300  | 0.53746700  | -0.04918500 |
| H | -5.66965600  | 0.99405300  | -1.04630800 |
| H | -5.55117200  | 1.36316500  | 0.66522100  |
| C | -6.98008600  | -0.17912500 | 0.19702300  |
| H | -6.96578300  | -0.63727700 | 1.19358400  |
| H | -7.08528200  | -1.00404800 | -0.51827300 |
| C | -8.19309300  | 0.74182500  | 0.08439800  |
| H | -8.20568700  | 1.19911700  | -0.91089600 |
| H | -8.08731400  | 1.56431400  | 0.80005600  |
| C | -9.51024500  | 0.01051400  | 0.33167000  |
| H | -9.52753800  | -0.43141700 | 1.33137500  |
| H | -10.36633500 | 0.68282100  | 0.24760200  |
| H | -9.64686000  | -0.79869500 | -0.39048800 |

**TS71:  $\text{HO}_2 + \text{CH}_3(\text{CH}_2)_{14}\text{CH}_3 \rightarrow \text{H}_2\text{O}_2 + \text{CH}_3(\text{CH}_2)_5\text{CH}(\text{CH}_2)_8\text{CH}_3$**

|   |              |             |             |
|---|--------------|-------------|-------------|
| C | -9.39510300  | 0.31611600  | 0.06434100  |
| H | -9.34680600  | 1.32644600  | -0.35044900 |
| H | -9.47722400  | 0.40770900  | 1.15074000  |
| H | -10.30988800 | -0.15344400 | -0.30257000 |
| C | -8.15521300  | -0.48716500 | -0.32068300 |
| H | -8.23093600  | -1.50132700 | 0.08651800  |
| H | -8.10847300  | -0.59487700 | -1.40983900 |
| C | -6.86276900  | 0.15771800  | 0.17401900  |
| H | -6.90746700  | 0.26725800  | 1.26477000  |
| H | -6.78710200  | 1.17323600  | -0.23379500 |
| C | -5.61146500  | -0.63053600 | -0.20466400 |
| H | -5.57235400  | -0.74578300 | -1.29459900 |
| H | -5.68121900  | -1.64353900 | 0.21024200  |
| C | -4.32229600  | 0.02925900  | 0.27717200  |
| H | -4.35785400  | 0.14181900  | 1.36811800  |
| H | -4.25262000  | 1.04022800  | -0.14127400 |
| C | -3.06645100  | -0.74817300 | -0.10976200 |
| H | -3.02594500  | -0.85832800 | -1.19946800 |

|   |             |             |             |
|---|-------------|-------------|-------------|
| H | -3.12024200 | -1.76412200 | 0.30413500  |
| C | -1.78737400 | -0.08653800 | 0.37257600  |
| H | -1.80500800 | 0.06462900  | 1.45845400  |
| H | -1.76713200 | 0.97090300  | -0.08073400 |
| C | -0.49562900 | -0.75614200 | -0.06459100 |
| H | -0.49817100 | -0.86264000 | -1.15545400 |
| H | -0.46411700 | -1.77399800 | 0.34707400  |
| C | 0.74881400  | 0.01470100  | 0.36966200  |
| H | 0.75386400  | 0.10952500  | 1.46261700  |
| H | 0.68848100  | 1.03306600  | -0.03089800 |
| C | 2.05035300  | -0.63861700 | -0.08694300 |
| H | 2.03633700  | -0.74759200 | -1.17816800 |
| H | 2.11565500  | -1.65388000 | 0.32341200  |
| C | 3.28923200  | 0.15400700  | 0.32307600  |
| H | 3.30571300  | 0.26336700  | 1.41441000  |
| H | 3.21780000  | 1.16898700  | -0.08618300 |
| C | 4.59561400  | -0.48536400 | -0.14007200 |
| H | 4.57444200  | -0.60338800 | -1.23032400 |
| H | 4.67432400  | -1.49680300 | 0.27707500  |
| C | 5.83015400  | 0.32155500  | 0.25520700  |
| H | 5.85249400  | 0.43981300  | 1.34549900  |
| H | 5.74850500  | 1.33293100  | -0.16148300 |
| C | 7.13861700  | -0.31112000 | -0.21070500 |
| H | 7.11437400  | -0.43509000 | -1.30041800 |
| H | 7.22577300  | -1.32025100 | 0.21073100  |
| C | 8.37170600  | 0.50315700  | 0.17498000  |
| H | 8.39524900  | 0.62624600  | 1.26329000  |
| H | 8.28234800  | 1.51025400  | -0.24684900 |
| C | 9.67229000  | -0.14013800 | -0.29890200 |
| H | 9.67772800  | -0.25012200 | -1.38656400 |
| H | 10.54270900 | 0.45629600  | -0.01806300 |
| H | 9.79422300  | -1.13623300 | 0.13499600  |
| O | -1.77534700 | 2.39314600  | -0.56598600 |
| H | -2.08754800 | 2.78722200  | 0.26467800  |

**OH-R72: HO<sub>2</sub> + CH<sub>3</sub>(CH<sub>2</sub>)<sub>14</sub>CH<sub>3</sub> → H<sub>2</sub>O<sub>2</sub> + CH<sub>3</sub>(CH<sub>2</sub>)<sub>6</sub>CH(CH<sub>2</sub>)<sub>7</sub>CH<sub>3</sub>**  
**CH<sub>3</sub>(CH<sub>2</sub>)<sub>6</sub>CH(CH<sub>2</sub>)<sub>7</sub>CH<sub>3</sub>**

|   |             |            |             |
|---|-------------|------------|-------------|
| C | -6.91709300 | 2.03957000 | -0.02453500 |
| H | -6.69795700 | 0.97196900 | -0.10945600 |
| H | -6.53106500 | 2.52925500 | -0.92241900 |
| H | -8.00223300 | 2.15945600 | -0.01770300 |
| C | -6.27756700 | 2.62663400 | 1.23131800  |
| H | -6.53031800 | 3.68938200 | 1.31223000  |

|   |             |            |             |
|---|-------------|------------|-------------|
| H | -6.69614400 | 2.14190400 | 2.11997500  |
| C | -4.75852000 | 2.47064900 | 1.24422600  |
| H | -4.50390300 | 1.40678900 | 1.16282600  |
| H | -4.33801500 | 2.95550800 | 0.35466100  |
| C | -4.10351700 | 3.05292600 | 2.49424800  |
| H | -4.52444300 | 2.56783100 | 3.38330100  |
| H | -4.35829700 | 4.11658500 | 2.57489500  |
| C | -2.58490400 | 2.89567200 | 2.50495500  |
| H | -2.16455900 | 3.38097700 | 1.61569700  |
| H | -2.33014700 | 1.83191700 | 2.42388700  |
| C | -1.93027000 | 3.47808600 | 3.75454300  |
| H | -2.34460100 | 2.98903900 | 4.64410100  |
| H | -2.18212300 | 4.54113600 | 3.83995500  |
| C | -0.40928800 | 3.32329400 | 3.76095100  |
| H | 0.01361800  | 3.80864500 | 2.87071600  |
| H | -0.16122300 | 2.25356400 | 3.65000200  |
| C | 0.24156500  | 3.87469200 | 4.98351500  |
| H | -0.32683800 | 3.89065800 | 5.90975500  |
| C | 1.71943800  | 4.05716800 | 5.05398100  |
| H | 2.07268200  | 4.54039900 | 4.13261700  |
| H | 2.22159700  | 3.07452400 | 5.07306800  |
| C | 2.17911100  | 4.86797100 | 6.26573400  |
| H | 1.82992800  | 4.37510300 | 7.18077000  |
| H | 1.69795700  | 5.85219900 | 6.24104800  |
| C | 3.69413700  | 5.04054500 | 6.32962000  |
| H | 4.04220000  | 5.53045600 | 5.41210500  |
| H | 4.17146800  | 4.05325200 | 6.35099300  |
| C | 4.15549500  | 5.85002100 | 7.53911800  |
| H | 3.80954700  | 5.35932200 | 8.45693200  |
| H | 3.67694400  | 6.83657500 | 7.51893100  |
| C | 5.67096900  | 6.02548400 | 7.60122400  |
| H | 6.01636100  | 6.51799400 | 6.68411900  |
| H | 6.14949800  | 5.03875100 | 7.61891500  |
| C | 6.13406700  | 6.83205500 | 8.81179700  |
| H | 5.79038600  | 6.33938800 | 9.72961700  |
| H | 5.65533500  | 7.81884400 | 8.79568500  |
| C | 7.64963600  | 7.00928500 | 8.87346100  |
| H | 7.99112600  | 7.50248700 | 7.95693500  |
| H | 8.12623400  | 6.02312600 | 8.88859000  |
| C | 8.09747500  | 7.81608000 | 10.08971900 |
| H | 7.78883700  | 7.32550500 | 11.01658900 |
| H | 9.18255600  | 7.93344600 | 10.11790600 |
| H | 7.65224800  | 8.81441400 | 10.07933100 |

**TS72: HO<sub>2</sub> + CH<sub>3</sub>(CH<sub>2</sub>)<sub>14</sub>CH<sub>3</sub> → H<sub>2</sub>O<sub>2</sub> + CH<sub>3</sub>(CH<sub>2</sub>)<sub>6</sub>CH(CH<sub>2</sub>)<sub>7</sub>CH<sub>3</sub>**

|   |              |             |             |
|---|--------------|-------------|-------------|
| C | -9.50991300  | -0.22256400 | -0.29568100 |
| H | -9.63403900  | -1.22073500 | 0.13279700  |
| H | -9.50999500  | -0.32720000 | -1.38388000 |
| H | -10.38163600 | 0.37261200  | -0.01622100 |
| C | -8.21164300  | 0.41832000  | 0.18773800  |
| H | -8.12014700  | 1.42741300  | -0.22872500 |
| H | -8.24049100  | 0.53601100  | 1.27654000  |
| C | -6.97673400  | -0.39406000 | -0.19609900 |
| H | -6.94688500  | -0.51174000 | -1.28636400 |
| H | -7.06620900  | -1.40553300 | 0.21925900  |
| C | -5.67075400  | 0.23616700  | 0.27992900  |
| H | -5.69813700  | 0.34748900  | 1.37087400  |
| H | -5.58670700  | 1.24978800  | -0.13030700 |
| C | -4.43439000  | -0.56794500 | -0.11521100 |
| H | -4.40948800  | -0.67896800 | -1.20605600 |
| H | -4.51374000  | -1.58189200 | 0.29597400  |
| C | -3.13159000  | 0.07327500  | 0.35470300  |
| H | -3.14882200  | 0.17252000  | 1.44713400  |
| H | -3.05477400  | 1.08929000  | -0.04889200 |
| C | -1.89126600  | -0.71422700 | -0.06124100 |
| H | -1.87645200  | -0.82476200 | -1.15162800 |
| H | -1.94095000  | -1.73017200 | 0.35347900  |
| C | -0.59658800  | -0.05977900 | 0.38976900  |
| H | -0.59102600  | 0.09625100  | 1.47504800  |
| H | -0.59818800  | 0.99607500  | -0.06780500 |
| C | 0.67938700   | -0.74129300 | -0.07283700 |
| H | 0.65097300   | -0.85757500 | -1.16223700 |
| H | 0.71424600   | -1.75529900 | 0.34772000  |
| C | 1.94072900   | 0.02146100  | 0.32504700  |
| H | 1.96333400   | 0.14253400  | 1.41539000  |
| H | 1.89085700   | 1.02986700  | -0.10254200 |
| C | 3.22740600   | -0.65885100 | -0.13441500 |
| H | 3.19978500   | -0.78485600 | -1.22345100 |
| H | 3.28013400   | -1.66822100 | 0.29157600  |
| C | 4.48314900   | 0.11932700  | 0.25106100  |
| H | 4.51615700   | 0.23848600  | 1.34102200  |
| H | 4.42182300   | 1.13145400  | -0.16711300 |
| C | 5.77332900   | -0.54391200 | -0.22392500 |
| H | 5.73795000   | -0.66532400 | -1.31345400 |
| H | 5.83920200   | -1.55507600 | 0.19604300  |
| C | 7.02570800   | 0.24267500  | 0.15485800  |



|   |             |             |             |
|---|-------------|-------------|-------------|
| H | 7.06573300  | 0.35953800  | 1.24496400  |
| H | 6.95572000  | 1.25599300  | −0.25960700 |
| C | 8.31830200  | −0.40985600 | −0.32932800 |
| H | 8.27671900  | −0.52485500 | −1.41797500 |
| H | 8.38834300  | −1.42158100 | 0.08489200  |
| C | 9.55931400  | 0.39128800  | 0.05660800  |
| H | 9.63569000  | 0.49047900  | 1.14274800  |
| H | 10.47426500 | −0.08458300 | −0.30172200 |
| H | 9.51739000  | 1.39884700  | −0.36559800 |
| O | −0.56523200 | 2.41540800  | −0.55987000 |
| H | −0.19545900 | 2.80030300  | 0.25121900  |
